# Supplementary material for: Transcriptomic Analysis Reveals the Regulatory Networks and Hub Genes Controlling the Unsaturated Fatty Acid Contents of Developing Seed in Soybean
Source: Front Plant Sci. 2022 May 12;13:876371. doi: 10.3389/fpls.2022.876371 (PMC9134122; doi:10.3389/fpls.2022.876371)
Supplement: Supplementary Table 1 — The DEGs at three developmental stages. [file Table_3.XLSX]

## Sheet: DEGs of DAF40
#ID	HO40a	HO40b	HO40c	LO40a	LO40b	LO40c	FDR	log2FC	regulated	COG_class	COG_class_annotation	GO_annotation	KEGG_annotation	KEGG_pathway_annotation	KOG_class	KOG_class_annotation	Pfam_annotation	Swiss_Prot_annotation	eggNOG_class	eggNOG_class_annotation	NR_annotation	GO_second_level_annotation
gene-LOC100820195	33.4025	51.5706	35.5717	6.39891	6.13433	6.28184	4.71199e-05	-1.21399	down	[G]	Carbohydrate transport and metabolism	Molecular Function: cellulase activity (GO:0008810);; Cellular Component: integral component of membrane (GO:0016021);; Biological Process: cellulose catabolic process (GO:0030245);;	K01179|1.2e-212|gra:105774882|K01179 endoglucanase [EC:3.2.1.4] | (RefSeq) endoglucanase 2-like	Starch and sucrose metabolism (ko00500)	--	--	Glycosyl hydrolase family 9	Endoglucanase 10 OS=Arabidopsis thaliana OX=3702 GN=At1g75680 PE=2 SV=2	G	Carbohydrate transport and metabolism	endoglucanase 2 [Glycine max]	molecular function: catalytic activity (GO:0003824);; cellular component: membrane (GO:0016020);; cellular component: membrane part (GO:0044425);; biological process: metabolic process (GO:0008152);; biological process: cellular process (GO:0009987)
gene-LOC100790298	3.15396	2.92318	3.36612	0	0	0	1.94745e-10	-7.48955	down	--	--	Biological Process: amino acid transmembrane transport (GO:0003333);; Cellular Component: plasma membrane (GO:0005886);; Molecular Function: amino acid transmembrane transporter activity (GO:0015171);; Cellular Component: integral component of membrane (GO:0016021);;	--	--	[E]	Amino acid transport and metabolism	Transmembrane amino acid transporter protein	Amino acid permease 8 OS=Arabidopsis thaliana OX=3702 GN=AAP8 PE=1 SV=1	E	Amino acid transport and metabolism	amino acid permease 8 isoform X1 [Glycine max]	biological process: single-organism process (GO:0044699);; biological process: localization (GO:0051179);; cellular component: cell (GO:0005623);; cellular component: membrane (GO:0016020);; cellular component: cell part (GO:0044464);; molecular function: transporter activity (GO:0005215);; cellular component: membrane part (GO:0044425)
gene-LOC100794561	5.79878	7.6395	5.70441	0.617297	0.196441	0.756065	7.8543e-07	-2.14478	down	[O]	Posttranslational modification, protein turnover, chaperones	Molecular Function: thioredoxin-disulfide reductase activity (GO:0004791);; Cellular Component: cytoplasm (GO:0005737);; Biological Process: removal of superoxide radicals (GO:0019430);;	K00384|2.4e-279|gmx:100794561|K00384 thioredoxin reductase (NADPH) [EC:1.8.1.9] | (RefSeq) NADPH-dependent thioredoxin reductase 3 isoform X2	Selenocompound metabolism (ko00450)	[O]	Posttranslational modification, protein turnover, chaperones	Pyridine nucleotide-disulphide oxidoreductase	Thioredoxin reductase NTRC OS=Oryza sativa subsp. japonica OX=39947 GN=Os07g0657900 PE=1 SV=2	O	Posttranslational modification, protein turnover, chaperones	NADPH-dependent thioredoxin reductase 3 isoform X1 [Glycine max]	molecular function: catalytic activity (GO:0003824);; molecular function: antioxidant activity (GO:0016209);; biological process: metabolic process (GO:0008152);; biological process: cellular process (GO:0009987);; biological process: single-organism process (GO:0044699);; biological process: response to stimulus (GO:0050896);; biological process: detoxification (GO:0098754);; cellular component:…
gene-LOC100790649	4.94989	3.37298	4.5772	0.332323	0.443443	0.352505	3.54741e-09	-1.97421	down	--	--	Cellular Component: chromosome, telomeric region (GO:0000781);; Molecular Function: DNA binding (GO:0003677);; Molecular Function: telomerase RNA reverse transcriptase activity (GO:0003721);; Cellular Component: nucleus (GO:0005634);; Molecular Function: metal ion binding (GO:0046872);;	K11126|0.0e+00|gmx:100790649|K11126 telomerase reverse transcriptase [EC:2.7.7.49] | (RefSeq) telomerase reverse transcriptase isoform X1	--	[LB]	Replication, recombination and repair;; Chromatin structure and dynamics	Telomerase ribonucleoprotein complex - RNA binding domain	Telomerase reverse transcriptase OS=Arabidopsis thaliana OX=3702 GN=TERT PE=1 SV=1	--	--	telomerase reverse transcriptase isoform X1 [Glycine max]	cellular component: cell (GO:0005623);; cellular component: organelle (GO:0043226);; cellular component: organelle part (GO:0044422);; cellular component: cell part (GO:0044464);; molecular function: binding (GO:0005488);; molecular function: catalytic activity (GO:0003824);; biological process: metabolic process (GO:0008152);; biological process: cellular process (GO:0009987)
gene-LOC102662096	5.25286	2.95308	4.63771	0.424115	0.189738	0.672544	0.000190371	-1.80088	down	--	--	Cellular Component: integral component of membrane (GO:0016021);;	--	--	--	--	--	--	--	--	uncharacterized protein LOC102662096 [Glycine max]	cellular component: membrane (GO:0016020);; cellular component: membrane part (GO:0044425)
gene-LOC100786690	0.950987	0.952153	1.21524	0.021997	0.073694	0.041057	4.80967e-05	-2.79236	down	--	--	Molecular Function: protein binding (GO:0005515);;	--	--	--	--	Leucine rich repeat	--	S	Function unknown	receptor like protein 29 [Glycine max]	molecular function: binding (GO:0005488)
gene-LOC100804317	13.2444	11.8176	13.7952	0.4383	0.302442	0.330204	2.45141e-34	-3.66632	down	--	--	Cellular Component: integral component of membrane (GO:0016021);;	--	--	--	--	Plant protein of unknown function	--	S	Function unknown	uncharacterized protein LOC100804317 isoform X1 [Glycine max]	cellular component: membrane (GO:0016020);; cellular component: membrane part (GO:0044425)
gene-LOC100798582	21.2097	33.6169	22.3128	1.89193	1.20734	2.58691	3.25856e-12	-2.32212	down	--	--	Biological Process: mitochondrial fission (GO:0000266);; Molecular Function: GTPase activity (GO:0003924);; Molecular Function: GTP binding (GO:0005525);; Cellular Component: cytoplasm (GO:0005737);; Molecular Function: microtubule binding (GO:0008017);; Cellular Component: membrane (GO:0016020);; Biological Process: organelle fission (GO:0048285);;	K17065|5.5e-97|gsl:Gasu_23230|K17065 dynamin 1-like protein [EC:3.6.5.5] | (RefSeq) dynamin GTPase	--	[UR]	Intracellular trafficking, secretion, and vesicular transport;; General function prediction only	Dynamin central region	Dynamin-related protein 1C OS=Arabidopsis thaliana OX=3702 GN=DRP1C PE=1 SV=2	U	Intracellular trafficking, secretion, and vesicular transport	dynamin-related protein 1C [Glycine max]	biological process: cellular process (GO:0009987);; biological process: cellular component organization or biogenesis (GO:0071840);; molecular function: catalytic activity (GO:0003824);; molecular function: binding (GO:0005488);; cellular component: cell (GO:0005623);; cellular component: cell part (GO:0044464);; cellular component: membrane (GO:0016020)
Glycine_max_newGene_5730	1.35476	0.265464	0.877361	9.55734	5.16052	8.05128	3.23647e-21	4.56599	up	--	--	--	--	--	--	--	--	--	--	--	--	--
gene-APX2	337.419	360.379	338.91	33.3961	23.2419	54.6433	1.11141e-09	-1.78682	down	[P]	Inorganic ion transport and metabolism	Biological Process: response to reactive oxygen species (GO:0000302);; Molecular Function: peroxidase activity (GO:0004601);; Cellular Component: chloroplast (GO:0009507);; Molecular Function: heme binding (GO:0020037);; Biological Process: cellular response to oxidative stress (GO:0034599);; Biological Process: hydrogen peroxide catabolic process (GO:0042744);;	K00434|6.6e-142|gmx:606508|K00434 L-ascorbate peroxidase [EC:1.11.1.11] | (RefSeq) APX2; L-ascorbate peroxidase 2	Ascorbate and aldarate metabolism (ko00053);; Glutathione metabolism (ko00480)	--	--	Peroxidase	L-ascorbate peroxidase, cytosolic OS=Pisum sativum OX=3888 GN=APX1 PE=1 SV=2	E	Amino acid transport and metabolism	L-ascorbate peroxidase 2 [Glycine max]	biological process: response to stimulus (GO:0050896);; molecular function: catalytic activity (GO:0003824);; molecular function: antioxidant activity (GO:0016209);; biological process: metabolic process (GO:0008152);; biological process: cellular process (GO:0009987);; biological process: single-organism process (GO:0044699);; biological process: detoxification (GO:0098754);; cellular component:…
gene-LOC100813562	9.01456	7.89854	8.91648	0.062666	0	0.277392	5.63834e-13	-4.50563	down	[HR]	Coenzyme transport and metabolism;; General function prediction only	Biological Process: jasmonic acid metabolic process (GO:0009694);; Biological Process: salicylic acid metabolic process (GO:0009696);; Molecular Function: hydrolase activity (GO:0016787);; Molecular Function: methyl indole-3-acetate esterase activity (GO:0080030);; Molecular Function: methyl salicylate esterase activity (GO:0080031);; Molecular Function: methyl jasmonate esterase activity (GO:008…	K20802|1.6e-67|ath:AT5G10300|K20802 (R)-mandelonitrile lyase [EC:4.1.2.10] | (RefSeq) MES5; methyl esterase 5	Cyanoamino acid metabolism (ko00460)	--	--	Alpha/beta hydrolase family	Salicylic acid-binding protein 2 OS=Nicotiana tabacum OX=4097 GN=SABP2 PE=1 SV=1	S	Function unknown	salicylic acid-binding protein 2 isoform X1 [Glycine max]	biological process: metabolic process (GO:0008152);; biological process: cellular process (GO:0009987);; biological process: single-organism process (GO:0044699);; molecular function: catalytic activity (GO:0003824)
gene-LOC100781899	3.64456	5.70328	4.1089	6.90096	7.09711	8.51668	1.32384e-12	2.17242	up	[E]	Amino acid transport and metabolism	Molecular Function: serine-type carboxypeptidase activity (GO:0004185);; Biological Process: proteolysis involved in cellular protein catabolic process (GO:0051603);;	K09645|6.6e-254|gmx:100781899|K09645 vitellogenic carboxypeptidase-like protein [EC:3.4.16.-] | (RefSeq) serine carboxypeptidase-like 50	--	[OE]	Posttranslational modification, protein turnover, chaperones;; Amino acid transport and metabolism	Serine carboxypeptidase	Serine carboxypeptidase-like 50 OS=Arabidopsis thaliana OX=3702 GN=SCPL50 PE=2 SV=1	O	Posttranslational modification, protein turnover, chaperones	serine carboxypeptidase-like 50 [Glycine max]	molecular function: catalytic activity (GO:0003824);; biological process: metabolic process (GO:0008152)
gene-LOC100794584	37.3584	41.995	35.0458	4.72412	3.97809	8.39783	3.2739e-05	-1.30212	down	[E]	Amino acid transport and metabolism	Molecular Function: catalytic activity (GO:0003824);; Biological Process: transsulfuration (GO:0019346);; Molecular Function: pyridoxal phosphate binding (GO:0030170);;	K01739|1.2e-302|gmx:100794584|K01739 cystathionine gamma-synthase [EC:2.5.1.48] | (RefSeq) cystathionine gamma-synthase 1, chloroplastic	Cysteine and methionine metabolism (ko00270);; Selenocompound metabolism (ko00450);; Sulfur metabolism (ko00920);; Biosynthesis of amino acids (ko01230)	[E]	Amino acid transport and metabolism	Cys/Met metabolism PLP-dependent enzyme	Cystathionine gamma-synthase 1, chloroplastic OS=Arabidopsis thaliana OX=3702 GN=CGS1 PE=1 SV=3	E	Amino acid transport and metabolism	cystathionine gamma-synthase 1, chloroplastic [Glycine max]	molecular function: catalytic activity (GO:0003824);; biological process: metabolic process (GO:0008152);; biological process: cellular process (GO:0009987);; biological process: single-organism process (GO:0044699);; molecular function: binding (GO:0005488)
gene-LOC100787661	4.11785	5.49496	4.60516	0.689511	0.215555	0.976222	0.00410663	-1.46463	down	[O]	Posttranslational modification, protein turnover, chaperones	Molecular Function: protein disulfide oxidoreductase activity (GO:0015035);;	--	--	--	--	DSBA-like thioredoxin domain	--	Q	Secondary metabolites biosynthesis, transport and catabolism	uncharacterized protein LOC100787661 [Glycine max]	molecular function: catalytic activity (GO:0003824);; biological process: metabolic process (GO:0008152);; biological process: single-organism process (GO:0044699)
gene-LOC100804604	5.17677	4.86311	5.18538	0.351187	0.312919	0.79546	2.9977e-06	-1.90179	down	[R]	General function prediction only	Cellular Component: chloroplast envelope (GO:0009941);; Cellular Component: integral component of membrane (GO:0016021);;	K03453|2.6e-223|gmx:100804604|K03453 bile acid:Na+ symporter, BASS family | (RefSeq) probable sodium/metabolite cotransporter BASS3, chloroplastic	--	[P]	Inorganic ion transport and metabolism	Sodium Bile acid symporter family	Probable sodium/metabolite cotransporter BASS3, chloroplastic OS=Arabidopsis thaliana OX=3702 GN=BASS3 PE=2 SV=1	P	Inorganic ion transport and metabolism	probable sodium/metabolite cotransporter BASS3, chloroplastic [Glycine max]	cellular component: cell (GO:0005623);; cellular component: organelle (GO:0043226);; cellular component: organelle part (GO:0044422);; cellular component: cell part (GO:0044464);; cellular component: membrane (GO:0016020);; cellular component: membrane part (GO:0044425)
gene-CYCB1_2	19.4774	14.9439	19.8265	0.915219	0.420355	0.213868	4.51919e-15	-3.59143	down	--	--	Cellular Component: host cell nucleus (GO:0042025);;	K21777|2.2e-252|gmx:547919|K21777 G2/mitotic-specific cyclin-B, other | (RefSeq) CYCB1;2; G2/mitotic-specific cyclin S13-7	--	[D]	Cell cycle control, cell division, chromosome partitioning	Cyclin, N-terminal domain	G2/mitotic-specific cyclin S13-6 OS=Glycine max OX=3847 PE=2 SV=1	D	Cell cycle control, cell division, chromosome partitioning	G2/mitotic-specific cyclin S13-7 [Glycine max]	cellular component: other organism (GO:0044215);; cellular component: other organism part (GO:0044217)
gene-LOC100801318	2.87567	2.84265	3.06191	3.05705	3.26645	2.26444	4.41094e-06	1.44862	up	--	--	Molecular Function: transcription cofactor activity (GO:0003712);; Molecular Function: transcription factor binding (GO:0008134);; Cellular Component: mediator complex (GO:0016592);; Biological Process: positive regulation of transcription from RNA polymerase II promoter (GO:0045944);;	--	--	--	--	--	Mediator of RNA polymerase II transcription subunit 19a OS=Arabidopsis thaliana OX=3702 GN=MED19A PE=1 SV=1	S	Function unknown	uncharacterized protein LOC100801318 isoform X1 [Glycine max]	molecular function: transcription factor activity, protein binding (GO:0000988);; biological process: biological regulation (GO:0065007);; molecular function: binding (GO:0005488);; cellular component: cell (GO:0005623);; cellular component: membrane-enclosed lumen (GO:0031974);; cellular component: macromolecular complex (GO:0032991);; cellular component: organelle (GO:0043226);; cellular compon…
gene-LOC100499986	18.6467	22.1189	18.0491	3.1628	2.86818	4.53048	0.000317224	-1.02532	down	--	--	Cellular Component: integral component of membrane (GO:0016021);;	K16569|5.1e-30|sita:101783840|K16569 gamma-tubulin complex component 2 | (RefSeq) gamma-tubulin complex component 2	--	[V]	Defense mechanisms	Protein of unknown function (DUF1068)	--	V	Defense mechanisms	uncharacterized protein LOC100499986 [Glycine max]	cellular component: membrane (GO:0016020);; cellular component: membrane part (GO:0044425)
gene-LOC778112	3.77223	3.60443	3.32316	0.321067	0.378653	0.318956	1.13058e-05	-1.65818	down	--	--	Molecular Function: DNA binding (GO:0003677);; Cellular Component: nucleus (GO:0005634);; Biological Process: regulation of transcription, DNA-templated (GO:0006355);;	K20043|1.8e-19|aip:107640400|K20043 clathrin coat assembly protein AP180 | (RefSeq) putative clathrin assembly protein At5g35200	--	--	--	Dof domain, zinc finger	Dof zinc finger protein 1 OS=Oryza sativa subsp. japonica OX=39947 GN=DOF1 PE=2 SV=1	K	Transcription	dof zinc finger protein DOF4.6-like isoform X1 [Glycine soja]	molecular function: binding (GO:0005488);; cellular component: cell (GO:0005623);; cellular component: organelle (GO:0043226);; cellular component: cell part (GO:0044464);; biological process: biological regulation (GO:0065007)
gene-LOC100802847	12.6691	13.8577	11.7123	0.912858	0.823314	1.20012	3.6945e-15	-2.22389	down	[I]	Lipid transport and metabolism	Molecular Function: 3-hydroxybutyrate dehydrogenase activity (GO:0003858);; Cellular Component: cytosol (GO:0005829);; Molecular Function: oxidoreductase activity, acting on the CH-OH group of donors, NAD or NADP as acceptor (GO:0016616);; Molecular Function: NADP binding (GO:0050661);; Molecular Function: NAD binding (GO:0051287);;	K18121|2.5e-161|gmx:100802847|K18121 glyoxylate/succinic semialdehyde reductase [EC:1.1.1.79 1.1.1.-] | (RefSeq) glyoxylate/succinic semialdehyde reductase 1	Glyoxylate and dicarboxylate metabolism (ko00630);; Butanoate metabolism (ko00650);; Carbon metabolism (ko01200)	[R]	General function prediction only	NAD binding domain of 6-phosphogluconate dehydrogenase	Glyoxylate/succinic semialdehyde reductase 1 OS=Arabidopsis thaliana OX=3702 GN=GLYR1 PE=1 SV=1	I	Lipid transport and metabolism	glyoxylate/succinic semialdehyde reductase 1 [Glycine max]	molecular function: catalytic activity (GO:0003824);; biological process: metabolic process (GO:0008152);; biological process: single-organism process (GO:0044699);; cellular component: cell (GO:0005623);; cellular component: cell part (GO:0044464);; molecular function: binding (GO:0005488)
gene-LOC100785159	71.7598	85.1785	66.7623	115.883	76.0321	122.734	6.30409e-18	1.90592	up	--	--	Cellular Component: endoplasmic reticulum membrane (GO:0005789);; Cellular Component: integral component of plasma membrane (GO:0005887);; Biological Process: intracellular protein transport (GO:0006886);; Biological Process: ER to Golgi vesicle-mediated transport (GO:0006888);; Biological Process: protein localization to endoplasmic reticulum exit site (GO:0070973);;	--	--	--	--	Bap31/Bap29 transmembrane region	--	S	Function unknown	uncharacterized protein LOC100785159 [Glycine max]	cellular component: cell (GO:0005623);; cellular component: membrane (GO:0016020);; cellular component: organelle (GO:0043226);; cellular component: organelle part (GO:0044422);; cellular component: membrane part (GO:0044425);; cellular component: cell part (GO:0044464);; biological process: localization (GO:0051179)
gene-LOC100815712	4.78141	4.01433	5.28882	0.566116	0.253621	0.518852	9.86732e-05	-1.8573	down	--	--	Cellular Component: integral component of membrane (GO:0016021);;	--	--	--	--	--	--	--	--	uncharacterized protein LOC100815712 [Glycine max]	cellular component: membrane (GO:0016020);; cellular component: membrane part (GO:0044425)
gene-LOC100787754	2.32573	2.68671	2.42792	3.00409	1.63191	5.37485	2.45836e-05	1.79445	up	[F]	Nucleotide transport and metabolism	Cellular Component: cytosol (GO:0005829);; Biological Process: purine nucleoside catabolic process (GO:0006152);; Molecular Function: purine nucleosidase activity (GO:0008477);;	K01240|1.2e-148|cit:102614134|K01240 uridine nucleosidase [EC:3.2.2.3] | (RefSeq) probable uridine nucleosidase 2	Pyrimidine metabolism (ko00240);; Nicotinate and nicotinamide metabolism (ko00760)	[F]	Nucleotide transport and metabolism	Inosine-uridine preferring nucleoside hydrolase	Probable uridine nucleosidase 2 OS=Arabidopsis thaliana OX=3702 GN=URH2 PE=2 SV=1	F	Nucleotide transport and metabolism	probable uridine nucleosidase 2 [Glycine max]	cellular component: cell (GO:0005623);; cellular component: cell part (GO:0044464);; biological process: metabolic process (GO:0008152);; biological process: cellular process (GO:0009987);; biological process: single-organism process (GO:0044699);; molecular function: catalytic activity (GO:0003824)
gene-LOC100806420	4.6304	10.8323	5.11333	0.59083	0.302356	0.812195	3.04918e-05	-2.12735	down	[E]	Amino acid transport and metabolism	Molecular Function: cysteine synthase activity (GO:0004124);; Cellular Component: cytoplasm (GO:0005737);; Cellular Component: mitochondrion (GO:0005739);; Biological Process: cysteine biosynthetic process from serine (GO:0006535);; Biological Process: cyanide metabolic process (GO:0019499);; Molecular Function: pyridoxal phosphate binding (GO:0030170);; Molecular Function: L-3-cyanoalanine synth…	K13034|3.0e-207|gmx:100806420|K13034 L-3-cyanoalanine synthase/ cysteine synthase [EC:2.5.1.47 4.4.1.9] | (RefSeq) beta-cyanoalanine synthase	Cysteine and methionine metabolism (ko00270);; Cyanoamino acid metabolism (ko00460);; Sulfur metabolism (ko00920);; Carbon metabolism (ko01200);; Biosynthesis of amino acids (ko01230)	[E]	Amino acid transport and metabolism	Pyridoxal-phosphate dependent enzyme	L-3-cyanoalanine synthase 1, mitochondrial OS=Malus domestica OX=3750 GN=CAS1 PE=1 SV=1	E	Amino acid transport and metabolism	beta-cyanoalanine synthase [Glycine max]	molecular function: catalytic activity (GO:0003824);; cellular component: cell (GO:0005623);; cellular component: cell part (GO:0044464);; cellular component: organelle (GO:0043226);; biological process: metabolic process (GO:0008152);; biological process: cellular process (GO:0009987);; biological process: single-organism process (GO:0044699);; molecular function: binding (GO:0005488)
gene-LOC100782780	3.94762	3.57571	4.03804	4.36645	5.93733	3.04514	1.09222e-05	1.6977	up	[R]	General function prediction only	--	--	--	--	--	von Willebrand factor type A domain	E3 ubiquitin-protein ligase WAV3 OS=Arabidopsis thaliana OX=3702 GN=WAV3 PE=1 SV=1	O	Posttranslational modification, protein turnover, chaperones	E3 ubiquitin-protein ligase WAV3-like [Glycine max]	--
gene-UR9	5.51996	2.387	4.53096	24.9388	19.2432	26.0069	1.04716e-36	3.91425	up	[Q]	Secondary metabolites biosynthesis, transport and catabolism	Molecular Function: urate oxidase activity (GO:0004846);; Cellular Component: peroxisome (GO:0005777);; Biological Process: purine nucleobase metabolic process (GO:0006144);; Biological Process: urate catabolic process (GO:0019628);;	K00365|3.0e-176|gmx:547453|K00365 urate oxidase [EC:1.7.3.3] | (RefSeq) UR9; uricase-2 isozyme 1	Purine metabolism (ko00230);; Caffeine metabolism (ko00232)	[Q]	Secondary metabolites biosynthesis, transport and catabolism	Uricase	Uricase-2 isozyme 1 OS=Glycine max OX=3847 PE=1 SV=2	Q	Secondary metabolites biosynthesis, transport and catabolism	uricase-2 isozyme 1 [Glycine max]	molecular function: catalytic activity (GO:0003824);; biological process: metabolic process (GO:0008152);; biological process: single-organism process (GO:0044699);; cellular component: cell (GO:0005623);; cellular component: organelle (GO:0043226);; cellular component: cell part (GO:0044464);; biological process: cellular process (GO:0009987)
gene-LOC102662413	0.864011	1.42301	0.924878	1.27241	0.665514	1.18699	0.00203412	1.33501	up	--	--	--	K09060|6.1e-30|oeu:111382929|K09060 plant G-box-binding factor | (RefSeq) bZIP transcription factor 16-like	--	--	--	Protein of unknown function (DUF760)	UV-B-induced protein At3g17800, chloroplastic OS=Arabidopsis thaliana OX=3702 GN=At3g17800 PE=2 SV=1	S	Function unknown	UV-B-induced protein At3g17800, chloroplastic [Glycine max]	--
gene-LOC100812700	8.42839	9.12142	8.10769	7.71997	8.22042	4.77605	0.00117417	1.16645	up	--	--	Biological Process: signal transduction (GO:0007165);;	K20642|2.2e-223|gmx:100812700|K20642 Rho GTPase-activating protein 22/24/25 | (RefSeq) rho GTPase-activating protein 2	--	[T]	Signal transduction mechanisms	RhoGAP domain	Rho GTPase-activating protein 2 OS=Arabidopsis thaliana OX=3702 GN=ROPGAP2 PE=1 SV=1	T	Signal transduction mechanisms	rho GTPase-activating protein 2 [Glycine max]	biological process: cellular process (GO:0009987);; biological process: biological regulation (GO:0065007)
gene-LOC100816914	3.06806	1.82093	2.42638	4.44625	5.32125	3.85177	3.66713e-12	2.36758	up	--	--	--	K18643|1.2e-53|gra:105795008|K18643 katanin p80 WD40 repeat-containing subunit B1 | (RefSeq) uncharacterized LOC105795008	--	--	--	Protein of unknown function (DUF789)	--	S	Function unknown	uncharacterized protein LOC100816914 isoform X2 [Glycine max]	--
Glycine_max_newGene_5860	3.00475	2.05432	2.34614	2.17496	1.68002	1.9566	0.000555022	1.09312	up	--	--	--	--	--	--	--	--	--	--	--	--	--
gene-LOC100819546	4.68494	3.49231	4.84933	3.76724	3.67983	2.17313	0.00487443	1.04282	up	[T]	Signal transduction mechanisms	Molecular Function: transmembrane receptor protein serine/threonine kinase activity (GO:0004675);; Molecular Function: ATP binding (GO:0005524);; Cellular Component: plasma membrane (GO:0005886);; Biological Process: protein phosphorylation (GO:0006468);;	K01180|2.4e-82|cmax:111487562|K01180 endo-1,3(4)-beta-glucanase [EC:3.2.1.6] | (RefSeq) uncharacterized protein LOC111487562	--	[T]	Signal transduction mechanisms	Protein tyrosine and serine/threonine kinase	Inactive protein kinase SELMODRAFT_444075 OS=Selaginella moellendorffii OX=88036 GN=SELMODRAFT_444075 PE=2 SV=1	T	Signal transduction mechanisms	inactive protein kinase SELMODRAFT_444075 [Glycine max]	molecular function: catalytic activity (GO:0003824);; molecular function: signal transducer activity (GO:0004871);; molecular function: molecular transducer activity (GO:0060089);; biological process: metabolic process (GO:0008152);; biological process: cellular process (GO:0009987);; biological process: signaling (GO:0023052);; biological process: single-organism process (GO:0044699);; biologica…
gene-LOC100820161	2.40036	0.793925	4.0716	30.7909	26.2933	39.1917	5.16604e-27	5.07449	up	[Q]	Secondary metabolites biosynthesis, transport and catabolism	Molecular Function: alditol:NADP+ 1-oxidoreductase activity (GO:0004032);; Cellular Component: cytosol (GO:0005829);; Molecular Function: alcohol dehydrogenase (NADP+) activity (GO:0008106);; Molecular Function: oxidoreductase activity (GO:0016491);;	K22374|6.5e-179|gmx:100820161|K22374 3''-deamino-3''-oxonicotianamine reductase [EC:1.1.1.285] | (RefSeq) NAD(P)H-dependent 6'-deoxychalcone synthase	--	[R]	General function prediction only	Aldo/keto reductase family	NAD(P)H-dependent 6'-deoxychalcone synthase OS=Glycine max OX=3847 PE=1 SV=1	S	Function unknown	chalcone reductase CHR5 [Glycine max]	molecular function: catalytic activity (GO:0003824);; biological process: metabolic process (GO:0008152);; biological process: single-organism process (GO:0044699);; cellular component: cell (GO:0005623);; cellular component: cell part (GO:0044464)
gene-LOC100791287	4.22857	3.90754	4.62149	6.92844	5.66027	5.5851	1.39138e-16	1.9561	up	--	--	Cellular Component: plasma membrane (GO:0005886);; Cellular Component: plasmodesma (GO:0009506);; Cellular Component: integral component of membrane (GO:0016021);;	--	--	--	--	Tetraspanin family	Tetraspanin-7 OS=Arabidopsis thaliana OX=3702 GN=TET7 PE=2 SV=1	S	Function unknown	tetraspanin-7 [Glycine max]	cellular component: cell (GO:0005623);; cellular component: membrane (GO:0016020);; cellular component: cell part (GO:0044464);; cellular component: cell junction (GO:0030054);; cellular component: membrane part (GO:0044425)
gene-LOC100788932	0.115508	0.252245	0.236537	0.359238	0.488307	0.315081	1.38614e-05	2.34271	up	--	--	Molecular Function: DNA binding (GO:0003677);; Molecular Function: protein dimerization activity (GO:0046983);;	K02995|1.3e-69|adu:107464504|K02995 small subunit ribosomal protein S8e | (RefSeq) 40S ribosomal protein S8	Ribosome (ko03010)	--	--	Protein of unknown function (DUF 659)	--	S	Function unknown	uncharacterized protein LOC100788932 [Glycine max]	molecular function: binding (GO:0005488)
gene-LOC100783342	12.9965	19.6565	16.3619	1.76678	1.34775	3.46178	0.000301738	-1.45322	down	--	--	Cellular Component: Golgi membrane (GO:0000139);; Biological Process: polysaccharide biosynthetic process (GO:0000271);; Cellular Component: cellular_component (GO:0005575);; Cellular Component: intracellular (GO:0005622);; Cellular Component: cell (GO:0005623);; Cellular Component: cytoplasm (GO:0005737);; Cellular Component: endosome (GO:0005768);; Cellular Component: vacuole (GO:0005773);; Cel…	K23871|1.3e-140|gmx:100783342|K23871 putative pectin methylesterase [EC:2.1.1.-] | (RefSeq) uncharacterized protein LOC100783342	--	--	--	--	Probable pectin methylesterase CGR2 OS=Arabidopsis thaliana OX=3702 GN=CGR2 PE=2 SV=1	S	Function unknown	uncharacterized protein LOC100783342 [Glycine max]	cellular component: cell (GO:0005623);; cellular component: membrane (GO:0016020);; cellular component: organelle (GO:0043226);; cellular component: organelle part (GO:0044422);; cellular component: cell part (GO:0044464);; biological process: metabolic process (GO:0008152);; biological process: single-organism process (GO:0044699);; biological process: multicellular organismal process (GO:003250…
Glycine_max_newGene_9912	3.42314	2.97276	3.2003	0.345892	0	0	0.00573638	-2.93314	down	--	--	--	--	--	--	--	--	--	--	--	hypothetical protein GLYMA_20G127000 [Glycine max]	--
gene-LOC100786565	5.37174	4.93499	6.18351	4.28651	4.68427	3.06049	0.00165184	1.02838	up	--	--	Molecular Function: protein binding (GO:0005515);;	--	--	--	--	BTB/POZ domain	BTB/POZ domain-containing protein At1g04390 OS=Arabidopsis thaliana OX=3702 GN=At1g04390 PE=2 SV=3	S	Function unknown	BTB/POZ domain-containing protein At1g04390 isoform X1 [Glycine max]	molecular function: binding (GO:0005488)
gene-LOC100818530	3.81419	3.30869	2.78483	0.727906	0.280714	0.375227	0.0055611	-1.35066	down	--	--	--	--	--	[S]	Function unknown	--	--	S	Function unknown	uncharacterized protein LOC100818530 [Glycine max]	--
Glycine_max_newGene_4881	4.66774	6.54274	4.78031	0.607565	0.890227	1.14307	0.00433913	-1.06543	down	--	--	Molecular Function: isomerase activity (GO:0016853);;	K01528|1.9e-110|lja:Lj0g3v0199559.2|K01528 dynamin 1/3 [EC:3.6.5.5] | (RefSeq) Lj0g3v0199559.2; -	Endocytosis (ko04144)	[R]	General function prediction only	Reverse transcriptase (RNA-dependent DNA polymerase)	Retrovirus-related Pol polyprotein from transposon RE2 OS=Arabidopsis thaliana OX=3702 GN=RE2 PE=4 SV=1	K	Transcription	Retrovirus-related Pol polyprotein from transposon TNT 1-94 [Glycine soja]	molecular function: catalytic activity (GO:0003824)
gene-CYP83D1	13.3984	16.39	15.2453	0.694172	0.394169	1.75088	6.49532e-08	-2.52629	down	[QV]	Secondary metabolites biosynthesis, transport and catabolism;; Defense mechanisms	Molecular Function: iron ion binding (GO:0005506);; Cellular Component: membrane (GO:0016020);; Molecular Function: oxidoreductase activity, acting on paired donors, with incorporation or reduction of molecular oxygen, NAD(P)H as one donor, and incorporation of one atom of oxygen (GO:0016709);; Molecular Function: heme binding (GO:0020037);;	K20617|1.0e-128|lja:Lj3g3v1475790.2|K20617 cytochrome P450 family 71 subfamily A | (RefSeq) Lj3g3v1475790.2; -	--	[Q]	Secondary metabolites biosynthesis, transport and catabolism	Cytochrome P450	Cytochrome P450 83B1 OS=Arabidopsis thaliana OX=3702 GN=CYP83B1 PE=1 SV=1	Q	Secondary metabolites biosynthesis, transport and catabolism	cytochrome P450 71A1 [Glycine max]	molecular function: binding (GO:0005488);; cellular component: membrane (GO:0016020);; molecular function: catalytic activity (GO:0003824);; biological process: metabolic process (GO:0008152);; biological process: single-organism process (GO:0044699)
gene-LOC100788693	27.5324	37.0483	26.7011	3.91284	3.34033	2.83287	6.39833e-09	-1.70618	down	--	--	Cellular Component: membrane (GO:0016020);; Cellular Component: integral component of membrane (GO:0016021);; Biological Process: protein localization to membrane (GO:0072657);;	K17086|0.0e+00|gmx:100788693|K17086 transmembrane 9 superfamily member 2/4 | (RefSeq) transmembrane 9 superfamily member 8	--	[U]	Intracellular trafficking, secretion, and vesicular transport	Endomembrane protein 70	Transmembrane 9 superfamily member 8 OS=Arabidopsis thaliana OX=3702 GN=TMN8 PE=2 SV=1	U	Intracellular trafficking, secretion, and vesicular transport	transmembrane 9 superfamily member 8 [Glycine max]	cellular component: membrane (GO:0016020);; cellular component: membrane part (GO:0044425);; biological process: localization (GO:0051179)
gene-LOC100803442	1.39303	1.49467	2.00497	0.176651	0	0.185391	0.00783513	-2.15444	down	--	--	--	--	--	--	--	Cotton fibre expressed protein	--	S	Function unknown	uncharacterized protein LOC100803442 [Glycine max]	--
gene-LOC100778412	5.33216	3.13542	6.60569	3.78065	4.15632	3.61653	0.00236515	1.10988	up	--	--	Molecular Function: DNA binding (GO:0003677);; Cellular Component: host cell nucleus (GO:0042025);;	--	--	--	--	Methyl-CpG binding domain	Methyl-CpG-binding domain-containing protein 13 OS=Arabidopsis thaliana OX=3702 GN=MBD13 PE=2 SV=1	S	Function unknown	uncharacterized protein LOC100778412 isoform X1 [Glycine max]	molecular function: binding (GO:0005488);; cellular component: other organism (GO:0044215);; cellular component: other organism part (GO:0044217)
gene-LOC100816855	62.4247	51.0413	62.9931	68.1802	25.2723	49.1516	0.000464996	1.08531	up	--	--	Molecular Function: translation elongation factor activity (GO:0003746);; Molecular Function: guanyl-nucleotide exchange factor activity (GO:0005085);; Cellular Component: cytosol (GO:0005829);; Cellular Component: eukaryotic translation elongation factor 1 complex (GO:0005853);; Biological Process: translational elongation (GO:0006414);;	K03232|7.8e-102|gmx:100816855|K03232 elongation factor 1-beta | (RefSeq) elongation factor 1-beta 2	--	[K]	Transcription	EF-1 guanine nucleotide exchange domain	Elongation factor 1-beta 1 OS=Arabidopsis thaliana OX=3702 GN=At5g12110 PE=2 SV=2	J	Translation, ribosomal structure and biogenesis	elongation factor 1-beta 2 [Glycine max]	molecular function: binding (GO:0005488);; biological process: metabolic process (GO:0008152);; biological process: cellular process (GO:0009987);; molecular function: molecular function regulator (GO:0098772);; biological process: biological regulation (GO:0065007);; cellular component: cell (GO:0005623);; cellular component: cell part (GO:0044464);; cellular component: macromolecular complex (G…
gene-MYB64	7.03907	9.23087	7.4522	1.47113	0.696789	1.74843	0.00112476	-1.17481	down	--	--	Molecular Function: transcription regulatory region sequence-specific DNA binding (GO:0000976);; Molecular Function: transcription factor activity, sequence-specific DNA binding (GO:0003700);; Cellular Component: nucleus (GO:0005634);; Biological Process: regulation of stomatal movement (GO:0010119);; Cellular Component: integral component of membrane (GO:0016021);; Biological Process: cell diffe…	K09422|6.9e-237|gmx:100037467|K09422 transcription factor MYB, plant | (RefSeq) MYB64; MYB transcription factor MYB64	--	[K]	Transcription	Myb-like DNA-binding domain	Transcription factor MYB61 OS=Arabidopsis thaliana OX=3702 GN=MYB61 PE=2 SV=1	K	Transcription	MYB transcription factor MYB64 [Glycine max]	molecular function: binding (GO:0005488);; molecular function: nucleic acid binding transcription factor activity (GO:0001071);; biological process: biological regulation (GO:0065007);; cellular component: cell (GO:0005623);; cellular component: organelle (GO:0043226);; cellular component: cell part (GO:0044464);; cellular component: membrane (GO:0016020);; cellular component: membrane part (GO:0…
gene-LOC100812857	4.47245	3.16236	4.96718	5.2249	6.26412	3.54337	7.58483e-06	1.70944	up	--	--	Biological Process: response to red or far red light (GO:0009639);; Biological Process: negative gravitropism (GO:0009959);;	--	--	--	--	Plant protein of unknown function (DUF641)	Protein GRAVITROPIC IN THE LIGHT 1 OS=Arabidopsis thaliana OX=3702 GN=GIL1 PE=1 SV=1	S	Function unknown	hypothetical protein GLYMA_18G067600 [Glycine max]	biological process: response to stimulus (GO:0050896)
gene-LOC100801237	7.76717	7.94441	5.92035	1.24387	0.481542	1.56544	0.0019191	-1.28649	down	[R]	General function prediction only	Molecular Function: oxidoreductase activity (GO:0016491);;	K05275|3.5e-67|mis:MICPUN_102447|K05275 pyridoxine 4-dehydrogenase [EC:1.1.1.65] | (RefSeq) predicted protein	Vitamin B6 metabolism (ko00750)	[C]	Energy production and conversion	Aldo/keto reductase family	Uncharacterized oxidoreductase At1g06690, chloroplastic OS=Arabidopsis thaliana OX=3702 GN=At1g06690 PE=1 SV=1	C	Energy production and conversion	uncharacterized oxidoreductase At1g06690, chloroplastic [Glycine max]	molecular function: catalytic activity (GO:0003824)
gene-LOC100799247	369.981	132.339	391.054	425.498	169.143	644.693	0.000217724	1.8347	up	[O]	Posttranslational modification, protein turnover, chaperones	Molecular Function: cysteine-type endopeptidase activity (GO:0004197);; Cellular Component: extracellular space (GO:0005615);; Cellular Component: lysosome (GO:0005764);; Biological Process: proteolysis involved in cellular protein catabolic process (GO:0051603);;	K16292|7.0e-110|vvi:100252285|K16292 KDEL-tailed cysteine endopeptidase [EC:3.4.22.-] | (RefSeq) senescence-specific cysteine protease SAG39	--	[O]	Posttranslational modification, protein turnover, chaperones	Papain family cysteine protease	Senescence-specific cysteine protease SAG39 OS=Oryza sativa subsp. japonica OX=39947 GN=SAG39 PE=2 SV=2	O	Posttranslational modification, protein turnover, chaperones	uncharacterized protein LOC100799247 precursor [Glycine max]	molecular function: catalytic activity (GO:0003824);; biological process: metabolic process (GO:0008152);; cellular component: extracellular region (GO:0005576);; cellular component: extracellular region part (GO:0044421);; cellular component: cell (GO:0005623);; cellular component: organelle (GO:0043226);; cellular component: cell part (GO:0044464)
gene-LOC100800208	9.08696	6.08169	9.59183	0.688445	0.586811	2.12185	0.00661904	-1.39842	down	--	--	--	--	--	--	--	--	Uncharacterized protein At3g49055 OS=Arabidopsis thaliana OX=3702 GN=At3g49055 PE=2 SV=1	S	Function unknown	hypothetical protein GLYMA_10G233600 [Glycine max]	--
Glycine_max_newGene_4136	19.6634	16.2713	18.0486	3.83393	1.06364	3.71505	0.00613366	-1.21252	down	--	--	--	--	--	--	--	--	--	--	--	hypothetical protein GLYMA_11G159200 [Glycine max]	--
Glycine_max_newGene_3988	0.735145	0.208993	0.482466	1.38457	0.553223	1.91162	1.33595e-06	2.73974	up	[E]	Amino acid transport and metabolism	Cellular Component: cytoplasm (GO:0005737);; Molecular Function: hydrolase activity (GO:0016787);;	K01262|6.0e-24|gmx:100803268|K01262 Xaa-Pro aminopeptidase [EC:3.4.11.9] | (RefSeq) aminopeptidase P1	--	[E]	Amino acid transport and metabolism	Creatinase/Prolidase N-terminal domain	Aminopeptidase P1 OS=Arabidopsis thaliana OX=3702 GN=APP1 PE=1 SV=1	E	Amino acid transport and metabolism	hypothetical protein GLYMA_11G064600, partial [Glycine max]	cellular component: cell (GO:0005623);; cellular component: cell part (GO:0044464);; molecular function: catalytic activity (GO:0003824)
gene-LOC100804915	12.8435	10.9666	13.4444	1.97717	1.47454	1.97754	3.06851e-08	-1.31561	down	[O]	Posttranslational modification, protein turnover, chaperones	Molecular Function: ATP binding (GO:0005524);; Cellular Component: mitochondrial matrix (GO:0005759);; Cellular Component: chloroplast (GO:0009507);; Cellular Component: plastid (GO:0009536);; Molecular Function: metal ion binding (GO:0046872);; Molecular Function: transition metal ion binding (GO:0046914);; Molecular Function: unfolded protein binding (GO:0051082);; Biological Process: chaperone…	K04078|2.3e-134|gmx:100804915|K04078 chaperonin GroES | (RefSeq) 20 kDa chaperonin, chloroplastic	--	[O]	Posttranslational modification, protein turnover, chaperones	Chaperonin 10 Kd subunit	20 kDa chaperonin, chloroplastic OS=Arabidopsis thaliana OX=3702 GN=CPN20 PE=1 SV=2	O	Posttranslational modification, protein turnover, chaperones	20 kDa chaperonin, chloroplastic [Glycine max]	molecular function: binding (GO:0005488);; cellular component: cell (GO:0005623);; cellular component: membrane-enclosed lumen (GO:0031974);; cellular component: organelle (GO:0043226);; cellular component: organelle part (GO:0044422);; cellular component: cell part (GO:0044464);; biological process: cellular process (GO:0009987);; biological process: biological regulation (GO:0065007)
gene-LOC100306436	1.26543	1.68653	1.28274	0.079762	0	0.059263	0.000140911	-3.16392	down	[L]	Replication, recombination and repair	Molecular Function: carbohydrate binding (GO:0030246);;	K03695|6.7e-35|adu:107486671|K03695 ATP-dependent Clp protease ATP-binding subunit ClpB | (RefSeq) LOW QUALITY PROTEIN: chaperone protein ClpB3, chloroplastic-like	--	--	--	Jacalin-like lectin domain	Jacalin-related lectin 19 OS=Arabidopsis thaliana OX=3702 GN=JAL19 PE=2 SV=1	S	Function unknown	jacalin-related lectin 19 [Glycine max]	molecular function: binding (GO:0005488)
gene-LOC100802172	7.60999	10.0543	7.51826	0.832594	0.523892	0.85102	8.14712e-13	-2.06324	down	--	--	--	--	--	--	--	--	--	--	--	mucin-5AC [Glycine max]	--
gene-LOC100784666	11.1654	9.70114	12.0671	9.00165	9.18591	6.93386	0.000112229	1.08636	up	[T]	Signal transduction mechanisms	Molecular Function: protein kinase activity (GO:0004672);; Molecular Function: ATP binding (GO:0005524);;	K04411|1.1e-86|cre:CHLREDRAFT_127161|K04411 serine/threonine kinase 4 | (RefSeq) MAPKKKK1; mitogen activated protein kinase kinase kinase kinase 1	--	[T]	Signal transduction mechanisms	Protein kinase domain	MAP3K epsilon protein kinase 1 OS=Arabidopsis thaliana OX=3702 GN=M3KE1 PE=1 SV=1	T	Signal transduction mechanisms	serine/threonine-protein kinase dst1 isoform X1 [Glycine max]	molecular function: catalytic activity (GO:0003824);; biological process: metabolic process (GO:0008152);; biological process: cellular process (GO:0009987);; molecular function: binding (GO:0005488)
gene-LOC100812848	17.3028	26.2033	16.965	2.88664	2.95884	2.28584	4.26595e-05	-1.41053	down	--	--	Cellular Component: cytoplasm (GO:0005737);; Molecular Function: methyltransferase activity (GO:0008168);; Cellular Component: integral component of membrane (GO:0016021);; Biological Process: methylation (GO:0032259);;	K23872|1.3e-125|smo:SELMODRAFT_74065|K23872 putative homogalacturonan methyltransferase [EC:2.1.1.-] | (RefSeq) hypothetical protein	--	--	--	Putative S-adenosyl-L-methionine-dependent methyltransferase	Probable methyltransferase PMT11 OS=Arabidopsis thaliana OX=3702 GN=At2g39750 PE=2 SV=1	S	Function unknown	probable methyltransferase PMT11 [Glycine max]	cellular component: cell (GO:0005623);; cellular component: cell part (GO:0044464);; molecular function: catalytic activity (GO:0003824);; cellular component: membrane (GO:0016020);; cellular component: membrane part (GO:0044425);; biological process: metabolic process (GO:0008152)
Glycine_max_newGene_5757	11.5912	1.4874	10.9389	0.173402	0.09595	0.187708	1.39128e-07	-3.90984	down	--	--	--	--	--	--	--	--	--	--	--	unknown [Glycine max]	--
gene-LOC100812433	9.44551	9.33899	8.18847	1.08502	1.50759	1.86875	0.000820345	-1.11402	down	--	--	Molecular Function: mRNA binding (GO:0003729);; Molecular Function: metal ion binding (GO:0046872);;	K13832|9.8e-33|boe:106335320|K13832 3-dehydroquinate dehydratase / shikimate dehydrogenase [EC:4.2.1.10 1.1.1.25] | (RefSeq) bifunctional 3-dehydroquinate dehydratase/shikimate dehydrogenase, chloroplastic-like isoform X1	Phenylalanine, tyrosine and tryptophan biosynthesis (ko00400);; Biosynthesis of amino acids (ko01230)	[R]	General function prediction only	Zinc finger C-x8-C-x5-C-x3-H type (and similar)	Zinc finger CCCH domain-containing protein 34 OS=Arabidopsis thaliana OX=3702 GN=At3g06410 PE=2 SV=2	S	Function unknown	zinc finger CCCH domain-containing protein 34 [Glycine max]	molecular function: binding (GO:0005488)
gene-LOC100305374	0.633608	0.995038	1.04899	0	0	0	4.29318e-06	-5.99728	down	--	--	Molecular Function: transferase activity, transferring acyl groups other than amino-acyl groups (GO:0016747);;	K13065|6.0e-141|cic:CICLE_v10001106mg|K13065 shikimate O-hydroxycinnamoyltransferase [EC:2.3.1.133] | (RefSeq) hypothetical protein	Phenylpropanoid biosynthesis (ko00940);; Flavonoid biosynthesis (ko00941);; Stilbenoid, diarylheptanoid and gingerol biosynthesis (ko00945)	--	--	Transferase family	Stemmadenine O-acetyltransferase OS=Catharanthus roseus OX=4058 GN=SAT PE=1 SV=1	S	Function unknown	transferase family protein isoform X1 [Glycine max]	molecular function: catalytic activity (GO:0003824)
gene-LOC100810538	10.1646	10.8143	10.4129	1.85154	1.06922	2.5099	0.000248847	-1.10386	down	--	--	Molecular Function: protein serine/threonine phosphatase activity (GO:0004722);; Molecular Function: magnesium-dependent protein serine/threonine phosphatase activity (GO:0004724);;	K14497|1.6e-21|oeu:111404627|K14497 protein phosphatase 2C [EC:3.1.3.16] | (RefSeq) probable protein phosphatase 2C 75	MAPK signaling pathway - plant (ko04016);; Plant hormone signal transduction (ko04075)	[T]	Signal transduction mechanisms	Protein phosphatase 2C	Probable protein phosphatase 2C 33 OS=Arabidopsis thaliana OX=3702 GN=PPC6-1 PE=1 SV=1	T	Signal transduction mechanisms	probable protein phosphatase 2C 33 [Glycine max]	molecular function: catalytic activity (GO:0003824);; biological process: metabolic process (GO:0008152);; biological process: cellular process (GO:0009987)
gene-LOC100814279	6.79251	5.58504	6.02637	7.99711	6.37663	14.4047	1.01434e-10	2.06153	up	[T]	Signal transduction mechanisms	Molecular Function: protein tyrosine phosphatase activity (GO:0004725);;	K18045|5.4e-121|gmx:100814279|K18045 tyrosine-protein phosphatase SIW14 [EC:3.1.3.48] | (RefSeq) probable tyrosine-protein phosphatase DSP4 isoform X1	--	[V]	Defense mechanisms	Tyrosine phosphatase family	Tyrosine-protein phosphatase DSP1 OS=Arabidopsis thaliana OX=3702 GN=DSP1 PE=1 SV=1	V	Defense mechanisms	Tyrosine-protein phosphatase DSP1 isoform B [Glycine soja]	molecular function: catalytic activity (GO:0003824);; biological process: metabolic process (GO:0008152);; biological process: cellular process (GO:0009987)
gene-LOC100802454	2.81766	1.46536	2.27213	0.047725	0.027646	0	3.86002e-13	-4.69375	down	--	--	Molecular Function: DNA binding (GO:0003677);; Molecular Function: transcription factor activity, sequence-specific DNA binding (GO:0003700);; Cellular Component: nucleus (GO:0005634);;	K09285|0.0e+00|gmx:100802454|K09285 AP2-like factor, ANT lineage | (RefSeq) AP2-like ethylene-responsive transcription factor ANT	--	--	--	AP2 domain	AP2-like ethylene-responsive transcription factor ANT OS=Arabidopsis thaliana OX=3702 GN=ANT PE=1 SV=2	K	Transcription	AP2-like ethylene-responsive transcription factor ANT [Glycine max]	molecular function: binding (GO:0005488);; molecular function: nucleic acid binding transcription factor activity (GO:0001071);; biological process: biological regulation (GO:0065007);; cellular component: cell (GO:0005623);; cellular component: organelle (GO:0043226);; cellular component: cell part (GO:0044464)
gene-LOC100792174	19.7454	10.0646	18.8885	0.664005	0.566671	1.26504	1.32453e-12	-2.78461	down	[J]	Translation, ribosomal structure and biogenesis	Biological Process: ribosomal large subunit assembly (GO:0000027);; Molecular Function: RNA binding (GO:0003723);; Molecular Function: structural constituent of ribosome (GO:0003735);; Biological Process: translation (GO:0006412);; Cellular Component: cytosolic large ribosomal subunit (GO:0022625);;	K02925|1.8e-251|gmx:100792174|K02925 large subunit ribosomal protein L3e | (RefSeq) 60S ribosomal protein L3	Ribosome (ko03010)	[J]	Translation, ribosomal structure and biogenesis	Ribosomal protein L3	60S ribosomal protein L3 OS=Oryza sativa subsp. japonica OX=39947 GN=RPL3 PE=2 SV=2	J	Translation, ribosomal structure and biogenesis	60S ribosomal protein L3-like [Glycine soja]	biological process: cellular process (GO:0009987);; biological process: cellular component organization or biogenesis (GO:0071840);; molecular function: binding (GO:0005488);; molecular function: structural molecule activity (GO:0005198);; biological process: metabolic process (GO:0008152);; cellular component: cell (GO:0005623);; cellular component: macromolecular complex (GO:0032991);; cellular…
gene-LOC100527548	18.5584	39.1092	20.9252	0.624351	0.509158	0.717296	1.9109e-18	-3.86035	down	--	--	Biological Process: ubiquitin-dependent protein catabolic process (GO:0006511);; Molecular Function: ubiquitin protein ligase activity (GO:0061630);;	K11982|2.9e-08|dzi:111317657|K11982 E3 ubiquitin-protein ligase RNF115/126 [EC:2.3.2.27] | (RefSeq) uncharacterized protein LOC111317657 isoform X1	--	[O]	Posttranslational modification, protein turnover, chaperones	Ring finger domain	--	O	Posttranslational modification, protein turnover, chaperones	uncharacterized protein LOC100527548 [Glycine max]	biological process: metabolic process (GO:0008152);; biological process: cellular process (GO:0009987);; molecular function: catalytic activity (GO:0003824)
gene-LOC100792012	8.1386	3.7245	7.24257	0	0.057484	0.051158	4.82917e-19	-5.56192	down	--	--	Molecular Function: catechol oxidase activity (GO:0004097);; Biological Process: pigment biosynthetic process (GO:0046148);; Molecular Function: metal ion binding (GO:0046872);;	K00422|0.0e+00|gmx:100792012|K00422 polyphenol oxidase [EC:1.10.3.1] | (RefSeq) polyphenol oxidase, chloroplastic	Tyrosine metabolism (ko00350);; Isoquinoline alkaloid biosynthesis (ko00950)	--	--	Protein of unknown function (DUF_B2219)	Polyphenol oxidase, chloroplastic OS=Malus domestica OX=3750 PE=1 SV=1	S	Function unknown	polyphenol oxidase, chloroplastic [Glycine max]	molecular function: catalytic activity (GO:0003824);; biological process: metabolic process (GO:0008152);; biological process: single-organism process (GO:0044699);; molecular function: binding (GO:0005488)
gene-LOC100811109	0.62152	0.576111	0.788191	1.09746	0.992736	0.84675	3.55302e-08	2.01504	up	--	--	Molecular Function: molecular_function (GO:0003674);; Molecular Function: binding (GO:0005488);; Cellular Component: cellular_component (GO:0005575);; Cellular Component: intracellular (GO:0005622);; Cellular Component: cell (GO:0005623);; Cellular Component: nucleus (GO:0005634);; Molecular Function: amino acid binding (GO:0016597);; Molecular Function: carboxylic acid binding (GO:0031406);; Mol…	--	--	--	--	ACT domain	ACT domain-containing protein ACR1 OS=Arabidopsis thaliana OX=3702 GN=ACR1 PE=2 SV=1	S	Function unknown	ACT domain-containing protein ACR1 isoform X1 [Glycine max]	molecular function: binding (GO:0005488);; cellular component: cell (GO:0005623);; cellular component: cell part (GO:0044464);; cellular component: organelle (GO:0043226)
gene-LOC100806797	1.426	2.51113	1.78411	0.056454	0.051192	0.224973	2.73047e-05	-2.54664	down	[P]	Inorganic ion transport and metabolism	Molecular Function: calcium-transporting ATPase activity (GO:0005388);; Molecular Function: ATP binding (GO:0005524);; Cellular Component: integral component of membrane (GO:0016021);;	K01537|0.0e+00|gmx:100806797|K01537 P-type Ca2+ transporter type 2C [EC:7.2.2.10] | (RefSeq) calcium-transporting ATPase 12, plasma membrane-type	--	[P]	Inorganic ion transport and metabolism	Cation transporting ATPase, C-terminus	Calcium-transporting ATPase 12, plasma membrane-type OS=Arabidopsis thaliana OX=3702 GN=ACA12 PE=2 SV=1	P	Inorganic ion transport and metabolism	calcium-transporting ATPase 12, plasma membrane-type, partial [Glycine max]	molecular function: catalytic activity (GO:0003824);; molecular function: transporter activity (GO:0005215);; biological process: localization (GO:0051179);; molecular function: binding (GO:0005488);; cellular component: membrane (GO:0016020);; cellular component: membrane part (GO:0044425)
gene-LOC100793777	3.05879	0.969085	2.70884	0.051818	0	0.298176	0.00772414	-2.56607	down	--	--	Molecular Function: transcription factor activity, sequence-specific DNA binding (GO:0003700);; Cellular Component: nucleus (GO:0005634);; Molecular Function: sequence-specific DNA binding (GO:0043565);;	K13425|5.9e-29|pda:103712469|K13425 WRKY transcription factor 22 | (RefSeq) WRKY transcription factor 22-like	MAPK signaling pathway - plant (ko04016);; Plant-pathogen interaction (ko04626)	--	--	WRKY DNA -binding domain	Probable WRKY transcription factor 65 OS=Arabidopsis thaliana OX=3702 GN=WRKY65 PE=2 SV=1	K	Transcription	probable WRKY transcription factor 65 [Glycine max]	molecular function: nucleic acid binding transcription factor activity (GO:0001071);; biological process: biological regulation (GO:0065007);; cellular component: cell (GO:0005623);; cellular component: organelle (GO:0043226);; cellular component: cell part (GO:0044464);; molecular function: binding (GO:0005488)
gene-LOC100803824	26.7563	48.7667	28.1602	5.49202	6.77335	4.46091	0.00655892	-1.13122	down	[O]	Posttranslational modification, protein turnover, chaperones	Molecular Function: ATP-dependent peptidase activity (GO:0004176);; Molecular Function: metalloendopeptidase activity (GO:0004222);; Molecular Function: ATP binding (GO:0005524);; Biological Process: proteolysis (GO:0006508);; Cellular Component: chloroplast thylakoid membrane (GO:0009535);; Cellular Component: chloroplast envelope (GO:0009941);; Biological Process: thylakoid membrane organizatio…	K03798|0.0e+00|gmx:100803824|K03798 cell division protease FtsH [EC:3.4.24.-] | (RefSeq) ATP-dependent zinc metalloprotease FTSH, chloroplastic	--	[O]	Posttranslational modification, protein turnover, chaperones	Peptidase family M41	ATP-dependent zinc metalloprotease FTSH, chloroplastic OS=Nicotiana tabacum OX=4097 GN=FTSH PE=2 SV=2	O	Posttranslational modification, protein turnover, chaperones	ATP-dependent zinc metalloprotease FTSH, chloroplastic-like [Glycine max]	molecular function: catalytic activity (GO:0003824);; biological process: metabolic process (GO:0008152);; molecular function: binding (GO:0005488);; cellular component: cell (GO:0005623);; cellular component: membrane (GO:0016020);; cellular component: organelle (GO:0043226);; cellular component: organelle part (GO:0044422);; cellular component: cell part (GO:0044464);; biological process: cellu…
gene-LOC100817987	5.04134	3.77996	5.0927	0.481083	0.323242	0.879238	1.77867e-05	-1.6368	down	--	--	Molecular Function: molecular_function (GO:0003674);; Molecular Function: nucleic acid binding (GO:0003676);; Molecular Function: DNA binding (GO:0003677);; Molecular Function: transcription factor activity, sequence-specific DNA binding (GO:0003700);; Molecular Function: binding (GO:0005488);; Cellular Component: cellular_component (GO:0005575);; Cellular Component: intracellular (GO:0005622);; …	K14494|6.2e-60|qsu:111997883|K14494 DELLA protein | (RefSeq) DELLA protein GAI-like	Plant hormone signal transduction (ko04075)	--	--	GRAS domain family	Scarecrow-like protein 13 OS=Arabidopsis thaliana OX=3702 GN=SCL13 PE=2 SV=2	K	Transcription	scarecrow-like protein 13 [Glycine max]	molecular function: binding (GO:0005488);; molecular function: nucleic acid binding transcription factor activity (GO:0001071);; biological process: biological regulation (GO:0065007);; cellular component: cell (GO:0005623);; cellular component: cell part (GO:0044464);; cellular component: organelle (GO:0043226)
Glycine_max_newGene_8826	1.88921	1.28628	1.4741	1.79225	1.01666	0.956084	0.00521249	1.1264	up	--	--	--	--	--	--	--	--	--	--	--	--	--
gene-LOC100306409	669.604	636.04	601.178	0.507854	0.060289	0	8.76904e-18	-8.88201	down	--	--	Biological Process: lipid transport (GO:0006869);;	--	--	--	--	Probable lipid transfer	Probable non-specific lipid-transfer protein AKCS9 OS=Vigna unguiculata OX=3917 PE=2 SV=1	S	Function unknown	alpha-amylase inhibitor/lipid transfer/seed storage family protein precursor [Glycine max]	biological process: single-organism process (GO:0044699);; biological process: localization (GO:0051179)
gene-LOC100791771	1.34305	0.437204	0.810056	2.21552	1.40431	3.20748	2.36436e-08	2.7356	up	--	--	--	--	--	--	--	--	--	S	Function unknown	uncharacterized protein LOC100791771 isoform X2 [Glycine max]	--
gene-LOC100798233	0.904658	0.282671	0.72642	0.013105	0	0	1.38997e-06	-4.96485	down	[U]	Intracellular trafficking, secretion, and vesicular transport	Molecular Function: protein serine/threonine kinase activity (GO:0004674);; Molecular Function: ATP binding (GO:0005524);; Cellular Component: plasma membrane (GO:0005886);; Cellular Component: integral component of membrane (GO:0016021);; Biological Process: protein autophosphorylation (GO:0046777);;	K01180|9.0e-68|cmax:111487562|K01180 endo-1,3(4)-beta-glucanase [EC:3.2.1.6] | (RefSeq) uncharacterized protein LOC111487562	--	--	--	Protein tyrosine and serine/threonine kinase	Probable LRR receptor-like serine/threonine-protein kinase At1g56140 OS=Arabidopsis thaliana OX=3702 GN=At1g56140 PE=2 SV=2	T	Signal transduction mechanisms	probable LRR receptor-like serine/threonine-protein kinase At1g56130 isoform X1 [Glycine max]	molecular function: catalytic activity (GO:0003824);; biological process: metabolic process (GO:0008152);; biological process: cellular process (GO:0009987);; molecular function: binding (GO:0005488);; cellular component: cell (GO:0005623);; cellular component: membrane (GO:0016020);; cellular component: cell part (GO:0044464);; cellular component: membrane part (GO:0044425)
gene-LOC100775563	3.92306	2.18417	3.9963	0.103483	0.234423	0.058282	4.5508e-07	-2.96294	down	--	--	Molecular Function: microtubule motor activity (GO:0003777);; Molecular Function: ATP binding (GO:0005524);; Cellular Component: kinesin complex (GO:0005871);; Cellular Component: microtubule (GO:0005874);; Biological Process: microtubule-based movement (GO:0007018);; Molecular Function: microtubule binding (GO:0008017);; Molecular Function: ATPase activity (GO:0016887);;	K11498|0.0e+00|gmx:100775563|K11498 centromeric protein E | (RefSeq) kinesin-like protein KIN-7N	--	[Z]	Cytoskeleton	Kinesin motor domain	Kinesin-like protein KIN-7N OS=Arabidopsis thaliana OX=3702 GN=KIN7N PE=2 SV=1	Z	Cytoskeleton	kinesin-like protein KIN-7N [Glycine max]	molecular function: catalytic activity (GO:0003824);; molecular function: binding (GO:0005488);; cellular component: cell (GO:0005623);; cellular component: macromolecular complex (GO:0032991);; cellular component: organelle (GO:0043226);; cellular component: organelle part (GO:0044422);; cellular component: cell part (GO:0044464);; cellular component: supramolecular complex (GO:0099080);; biolog…
gene-LOC102665927	7.28785	9.48415	8.77549	1.5068	0.171637	1.01082	0.00167989	-1.80132	down	--	--	--	--	--	--	--	--	Uncharacterized protein At3g17950 OS=Arabidopsis thaliana OX=3702 GN=Y-3 PE=1 SV=1	--	--	uncharacterized protein At3g17950 [Glycine max]	--
gene-LOC106794462	2.52591	2.59392	4.15027	0.074316	0	0	1.90569e-06	-4.48522	down	--	--	--	K01206|2.1e-18|smo:SELMODRAFT_441539|K01206 alpha-L-fucosidase [EC:3.2.1.51] | (RefSeq) hypothetical protein	Other glycan degradation (ko00511)	--	--	Ferritin-like domain	Desiccation-related protein PCC13-62 OS=Craterostigma plantagineum OX=4153 PE=2 SV=1	S	Function unknown	desiccation-related protein PCC13-62-like [Glycine max]	--
gene-LOC100814573	3.38208	2.47425	3.2575	0.078179	0.087002	0.095653	1.88197e-13	-3.4896	down	--	--	--	--	--	--	--	--	--	--	--	uncharacterized protein LOC100814573 [Glycine max]	--
gene-LOC100804948	4.8034	3.16175	4.01109	0.428839	0.558247	0.247563	0.00198852	-1.6705	down	--	--	Molecular Function: DNA binding (GO:0003677);; Cellular Component: nucleus (GO:0005634);;	--	--	--	--	B3 DNA binding domain	B3 domain-containing protein Os04g0386900 OS=Oryza sativa subsp. japonica OX=39947 GN=Os04g0386900 PE=2 SV=3	K	Transcription	B3 domain-containing protein Os04g0386900 isoform X1 [Glycine max]	molecular function: binding (GO:0005488);; cellular component: cell (GO:0005623);; cellular component: organelle (GO:0043226);; cellular component: cell part (GO:0044464)
gene-DDKCS	6.19448	6.94635	7.31567	1.02072	1.11146	1.41353	0.000641355	-1.04816	down	[Q]	Secondary metabolites biosynthesis, transport and catabolism	Biological Process: fatty acid biosynthetic process (GO:0006633);; Cellular Component: integral component of membrane (GO:0016021);; Molecular Function: transferase activity, transferring acyl groups other than amino-acyl groups (GO:0016747);;	K15397|1.5e-294|gmx:100797855|K15397 3-ketoacyl-CoA synthase [EC:2.3.1.199] | (RefSeq) DDKCS; uncharacterized protein LOC100797855	Fatty acid elongation (ko00062);; Plant-pathogen interaction (ko04626)	--	--	FAE1/Type III polyketide synthase-like protein	3-ketoacyl-CoA synthase 4 OS=Arabidopsis thaliana OX=3702 GN=KCS4 PE=2 SV=1	I	Lipid transport and metabolism	uncharacterized protein LOC100797855 [Glycine max]	biological process: metabolic process (GO:0008152);; biological process: cellular process (GO:0009987);; biological process: single-organism process (GO:0044699);; cellular component: membrane (GO:0016020);; cellular component: membrane part (GO:0044425);; molecular function: catalytic activity (GO:0003824)
gene-LOC102669138	46.4859	14.277	42.9227	0.429638	0.126185	0	8.30516e-15	-5.62372	down	--	--	Cellular Component: membrane (GO:0016020);;	--	--	--	--	Probable lipid transfer	--	--	--	non-specific lipid-transfer protein C, cotyledon-specific isoform [Glycine max]	cellular component: membrane (GO:0016020)
gene-LOC100805897	3.62455	2.92924	4.4879	3.24814	2.49699	3.26677	5.71972e-06	1.15523	up	--	--	Cellular Component: integral component of membrane (GO:0016021);;	K09775|3.3e-20|dzi:111283728|K09775 uncharacterized protein | (RefSeq) uncharacterized protein LOC111283728 isoform X1	--	--	--	Core-2/I-Branching enzyme	Glycosyltransferase BC10 OS=Oryza sativa subsp. japonica OX=39947 GN=BC10 PE=1 SV=1	S	Function unknown	uncharacterized protein LOC100805897 [Glycine max]	cellular component: membrane (GO:0016020);; cellular component: membrane part (GO:0044425)
gene-LOC100804422	5.74805	3.72284	6.06007	5.29553	6.62184	4.92437	1.48749e-06	1.60374	up	[P]	Inorganic ion transport and metabolism	Molecular Function: ATP binding (GO:0005524);; Cellular Component: plasma membrane (GO:0005886);; Molecular Function: hydrogen-exporting ATPase activity, phosphorylative mechanism (GO:0008553);; Cellular Component: integral component of membrane (GO:0016021);; Molecular Function: ATPase activity (GO:0016887);; Biological Process: regulation of intracellular pH (GO:0051453);; Biological Process: h…	K01535|0.0e+00|gmx:100804422|K01535 H+-transporting ATPase [EC:7.1.2.1] | (RefSeq) plasma membrane ATPase 4	Oxidative phosphorylation (ko00190)	[P]	Inorganic ion transport and metabolism	E1-E2 ATPase	Plasma membrane ATPase 4 OS=Nicotiana plumbaginifolia OX=4092 GN=PMA4 PE=2 SV=1	P	Inorganic ion transport and metabolism	plasma membrane ATPase 4 [Glycine max]	molecular function: binding (GO:0005488);; cellular component: cell (GO:0005623);; cellular component: membrane (GO:0016020);; cellular component: cell part (GO:0044464);; molecular function: catalytic activity (GO:0003824);; molecular function: transporter activity (GO:0005215);; biological process: single-organism process (GO:0044699);; biological process: localization (GO:0051179);; cellular c…
gene-LOC100816657	5.31786	4.98749	4.8379	0.338737	0.263332	0.834805	4.37822e-05	-1.90668	down	[H]	Coenzyme transport and metabolism	Molecular Function: methyltransferase activity (GO:0008168);; Cellular Component: integral component of membrane (GO:0016021);;	--	--	--	--	Methyltransferase domain	--	S	Function unknown	uncharacterized protein LOC100816657 [Glycine max]	molecular function: catalytic activity (GO:0003824);; cellular component: membrane (GO:0016020);; cellular component: membrane part (GO:0044425)
gene-LOXB1	296.167	343.786	305.238	0.02887	0.105668	0.084941	8.99689e-173	-10.4201	down	--	--	Molecular Function: oxidoreductase activity, acting on single donors with incorporation of molecular oxygen, incorporation of two atoms of oxygen (GO:0016702);; Biological Process: oxylipin biosynthetic process (GO:0031408);; Biological Process: lipid oxidation (GO:0034440);; Molecular Function: metal ion binding (GO:0046872);;	K15718|0.0e+00|gmx:547836|K15718 linoleate 9S-lipoxygenase [EC:1.13.11.58] | (RefSeq) LOXB1; linoleate 9S-lipoxygenase-4	Linoleic acid metabolism (ko00591)	--	--	Lipoxygenase	Linoleate 9S-lipoxygenase-4 OS=Glycine max OX=3847 GN=LOX1.5 PE=1 SV=1	E	Amino acid transport and metabolism	linoleate 9S-lipoxygenase-4 [Glycine max]	molecular function: catalytic activity (GO:0003824);; biological process: metabolic process (GO:0008152);; biological process: single-organism process (GO:0044699);; biological process: cellular process (GO:0009987);; molecular function: binding (GO:0005488)
gene-LOC547658	1587.37	1172.47	1650.89	63.7405	54.6446	121.884	2.21992e-18	-2.73414	down	[R]	General function prediction only	Molecular Function: alcohol dehydrogenase activity, zinc-dependent (GO:0004024);; Cellular Component: cytosol (GO:0005829);; Molecular Function: zinc ion binding (GO:0008270);; Biological Process: formaldehyde catabolic process (GO:0046294);; Molecular Function: S-(hydroxymethyl)glutathione dehydrogenase activity (GO:0051903);;	K18857|2.4e-220|gmx:547658|K18857 alcohol dehydrogenase class-P [EC:1.1.1.1] | (RefSeq) alcohol dehydrogenase 1	Glycolysis / Gluconeogenesis (ko00010);; Fatty acid degradation (ko00071);; Tyrosine metabolism (ko00350);; alpha-Linolenic acid metabolism (ko00592)	[Q]	Secondary metabolites biosynthesis, transport and catabolism	Zinc-binding dehydrogenase	Alcohol dehydrogenase 1 OS=Pisum sativum OX=3888 PE=1 SV=1	Q	Secondary metabolites biosynthesis, transport and catabolism	alcohol dehydrogenase 1 [Glycine max]	molecular function: catalytic activity (GO:0003824);; biological process: metabolic process (GO:0008152);; biological process: single-organism process (GO:0044699);; cellular component: cell (GO:0005623);; cellular component: cell part (GO:0044464);; molecular function: binding (GO:0005488);; biological process: cellular process (GO:0009987);; biological process: response to stimulus (GO:0050896)…
gene-LOC100783824	54.3006	51.8149	54.5264	10.2202	8.18134	10.8105	1.79465e-10	-1.00779	down	[T]	Signal transduction mechanisms	Molecular Function: protein serine/threonine kinase activity (GO:0004674);; Molecular Function: ATP binding (GO:0005524);;	K08960|2.8e-268|gmx:100783824|K08960 casein kinase 1, epsilon [EC:2.7.11.1] | (RefSeq) casein kinase 1-like protein 6	--	[T]	Signal transduction mechanisms	Protein kinase domain	Casein kinase 1-like protein 6 OS=Arabidopsis thaliana OX=3702 GN=CKL6 PE=1 SV=1	T	Signal transduction mechanisms	casein kinase 1-like protein 6 [Glycine max]	molecular function: catalytic activity (GO:0003824);; biological process: metabolic process (GO:0008152);; biological process: cellular process (GO:0009987);; molecular function: binding (GO:0005488)
Glycine_max_newGene_9161	0.50666	0.303498	0.649285	2.36736	2.13669	0.963496	2.34123e-13	3.43446	up	--	--	--	--	--	--	--	--	--	--	--	--	--
gene-LOC100796917	7.47549	6.40465	7.06067	4.89827	6.89588	3.54814	0.00333241	1.13857	up	--	--	Cellular Component: cytoplasm (GO:0005737);; Cellular Component: nuclear microtubule (GO:0005880);; Molecular Function: microtubule binding (GO:0008017);; Biological Process: spindle assembly (GO:0051225);;	K13172|1.7e-90|cmax:111493922|K13172 serine/arginine repetitive matrix protein 2 | (RefSeq) uncharacterized protein LOC111493922 isoform X1	--	--	--	QWRF family	AUGMIN subunit 8 OS=Arabidopsis thaliana OX=3702 GN=AUG8 PE=1 SV=1	S	Function unknown	AUGMIN subunit 8 [Glycine max]	cellular component: cell (GO:0005623);; cellular component: cell part (GO:0044464);; cellular component: organelle (GO:0043226);; cellular component: organelle part (GO:0044422);; cellular component: supramolecular complex (GO:0099080);; molecular function: binding (GO:0005488);; biological process: cellular process (GO:0009987);; biological process: single-organism process (GO:0044699);; biologi…
gene-PM34	11.3913	4.11244	13.7535	705.507	450.046	701.893	9.8452e-80	7.31768	up	[IQR]	Lipid transport and metabolism;; Secondary metabolites biosynthesis, transport and catabolism;; General function prediction only	Molecular Function: oxidoreductase activity (GO:0016491);;	K00059|1.4e-29|qsu:112018695|K00059 3-oxoacyl-[acyl-carrier protein] reductase [EC:1.1.1.100] | (RefSeq) short chain dehydrogenase mdpC-like	Fatty acid biosynthesis (ko00061);; Biotin metabolism (ko00780);; Fatty acid metabolism (ko01212)	[R]	General function prediction only	Enoyl-(Acyl carrier protein) reductase	Glucose and ribitol dehydrogenase OS=Daucus carota OX=4039 GN=CAISE5 PE=2 SV=1	Q	Secondary metabolites biosynthesis, transport and catabolism	seed maturation protein PM34 [Glycine max]	molecular function: catalytic activity (GO:0003824)
gene-LOC100783020	9.68326	7.65342	9.68259	1.20378	0.958176	1.19412	2.5278e-12	-1.54426	down	[T]	Signal transduction mechanisms	Molecular Function: hydrolase activity, acting on ester bonds (GO:0016788);;	K12867|4.1e-24|cvr:CHLNCDRAFT_134697|K12867 pre-mRNA-splicing factor SYF1 | (RefSeq) hypothetical protein	Spliceosome (ko03040)	[R]	General function prediction only	Calcineurin-like phosphoesterase	Probable inactive purple acid phosphatase 29 OS=Arabidopsis thaliana OX=3702 GN=PAP29 PE=2 SV=1	S	Function unknown	probable inactive purple acid phosphatase 29 [Glycine max]	molecular function: catalytic activity (GO:0003824)
gene-LOC100799995	18.9018	16.046	15.2043	0.515694	0.078708	0.089956	5.79679e-18	-4.63318	down	--	--	--	--	--	--	--	--	--	S	Function unknown	uncharacterized protein LOC100799995 [Glycine max]	--
gene-LOC100810144	5.60655	4.2409	5.55617	3.56812	5.52084	3.47459	0.00146782	1.20902	up	[P]	Inorganic ion transport and metabolism	Molecular Function: cation transmembrane transporter activity (GO:0008324);; Cellular Component: integral component of membrane (GO:0016021);;	K14692|0.0e+00|gmx:100810144|K14692 solute carrier family 30 (zinc transporter), member 5/7 | (RefSeq) LOW QUALITY PROTEIN: probable zinc transporter protein DDB_G0291141	--	[P]	Inorganic ion transport and metabolism	Cation efflux family	Metal tolerance protein 8 OS=Oryza sativa subsp. japonica OX=39947 GN=MTP8 PE=2 SV=2	P	Inorganic ion transport and metabolism	LOW QUALITY PROTEIN: probable zinc transporter protein DDB_G0291141 [Glycine max]	molecular function: transporter activity (GO:0005215);; biological process: localization (GO:0051179);; cellular component: membrane (GO:0016020);; cellular component: membrane part (GO:0044425)
gene-LOC100816150	14.6791	11.386	13.7041	11.6545	8.32742	9.2683	5.44619e-07	1.00449	up	[E]	Amino acid transport and metabolism	Molecular Function: glutamate 5-kinase activity (GO:0004349);; Molecular Function: glutamate-5-semialdehyde dehydrogenase activity (GO:0004350);; Molecular Function: ATP binding (GO:0005524);; Cellular Component: cytoplasm (GO:0005737);; Biological Process: L-proline biosynthetic process (GO:0055129);;	K12657|0.0e+00|gmx:100816150|K12657 delta-1-pyrroline-5-carboxylate synthetase [EC:2.7.2.11 1.2.1.41] | (RefSeq) delta-1-pyrroline-5-carboxylate synthase	Arginine and proline metabolism (ko00330);; Biosynthesis of amino acids (ko01230)	[E]	Amino acid transport and metabolism	Amino acid kinase family	Delta-1-pyrroline-5-carboxylate synthase OS=Vigna aconitifolia OX=3918 PE=2 SV=1	E	Amino acid transport and metabolism	delta-1-pyrroline-5-carboxylate synthase [Glycine max]	molecular function: catalytic activity (GO:0003824);; biological process: metabolic process (GO:0008152);; biological process: cellular process (GO:0009987);; biological process: single-organism process (GO:0044699);; molecular function: binding (GO:0005488);; cellular component: cell (GO:0005623);; cellular component: cell part (GO:0044464)
gene-LOC100306044	6.84085	2.9169	6.62141	0.462591	0	0.45209	0.00115548	-2.59569	down	--	--	Molecular Function: oxidoreductase activity (GO:0016491);;	K01166|3.0e-16|gra:105775724|K01166 ribonuclease T2 [EC:4.6.1.19] | (RefSeq) ribonuclease 1-like	--	--	--	Gamma interferon inducible lysosomal thiol reductase (GILT)	--	O	Posttranslational modification, protein turnover, chaperones	GILT domain-containing protein isoform X1 [Glycine max]	molecular function: catalytic activity (GO:0003824)
gene-LOC100794096	20.5732	15.3635	22.0472	1.14532	0.784389	1.5029	5.36913e-24	-2.61164	down	--	--	Molecular Function: DNA binding (GO:0003677);; Molecular Function: transcription factor activity, sequence-specific DNA binding (GO:0003700);; Cellular Component: nucleus (GO:0005634);;	K09284|1.3e-283|gmx:100794096|K09284 AP2-like factor, euAP2 lineage | (RefSeq) floral homeotic protein APETALA 2 isoform X3	--	--	--	AP2 domain	Floral homeotic protein APETALA 2 OS=Arabidopsis thaliana OX=3702 GN=AP2 PE=1 SV=1	K	Transcription	floral homeotic protein APETALA 2 isoform X1 [Glycine max]	molecular function: binding (GO:0005488);; molecular function: nucleic acid binding transcription factor activity (GO:0001071);; biological process: biological regulation (GO:0065007);; cellular component: cell (GO:0005623);; cellular component: organelle (GO:0043226);; cellular component: cell part (GO:0044464)
gene-LOC100800250	7.60409	11.347	8.05508	0.877729	0.945372	0.88552	1.18684e-07	-1.83113	down	[S]	Function unknown	Cellular Component: integral component of membrane (GO:0016021);;	K07556|1.1e-28|gsl:Gasu_39180|K07556 ATP synthase mitochondrial F1 complex assembly factor 2 | (RefSeq) ATP synthase mitochondrial F1 complex assembly factor 2	--	--	--	Protein of unknown function (DUF1517)	--	S	Function unknown	uncharacterized protein LOC100800250 [Glycine max]	cellular component: membrane (GO:0016020);; cellular component: membrane part (GO:0044425)
gene-LOC100808223	2.408	0.603127	3.26424	0.074498	0.052706	0.064488	6.58635e-06	-3.31475	down	[QV]	Secondary metabolites biosynthesis, transport and catabolism;; Defense mechanisms	Molecular Function: iron ion binding (GO:0005506);; Cellular Component: membrane (GO:0016020);; Molecular Function: oxidoreductase activity, acting on paired donors, with incorporation or reduction of molecular oxygen, NAD(P)H as one donor, and incorporation of one atom of oxygen (GO:0016709);; Molecular Function: heme binding (GO:0020037);;	K13261|2.7e-299|gmx:100808223|K13261 3,9-dihydroxypterocarpan 6a-monooxygenase [EC:1.14.14.93] | (RefSeq) 3,9-dihydroxypterocarpan 6A-monooxygenase	Isoflavonoid biosynthesis (ko00943)	[Q]	Secondary metabolites biosynthesis, transport and catabolism	Cytochrome P450	3,9-dihydroxypterocarpan 6A-monooxygenase OS=Glycine max OX=3847 GN=CYP93A1 PE=1 SV=1	Q	Secondary metabolites biosynthesis, transport and catabolism	3,9-dihydroxypterocarpan 6A-monooxygenase [Glycine max]	molecular function: binding (GO:0005488);; cellular component: membrane (GO:0016020);; molecular function: catalytic activity (GO:0003824);; biological process: metabolic process (GO:0008152);; biological process: single-organism process (GO:0044699)
gene-LOC100799245	2.58573	6.21571	2.76171	0	0	0.076133	2.86675e-09	-5.25676	down	[OT]	Posttranslational modification, protein turnover, chaperones;; Signal transduction mechanisms	Cellular Component: chloroplast (GO:0009507);; Cellular Component: chloroplast thylakoid membrane (GO:0009535);; Cellular Component: chloroplast stroma (GO:0009570);;	K03844|2.3e-37|mng:MNEG_1379|K03844 alpha-1,2-mannosyltransferase [EC:2.4.1.131] | (RefSeq) alpha-1,2-mannosyltransferase	N-Glycan biosynthesis (ko00510);; Various types of N-glycan biosynthesis (ko00513)	--	--	--	ACT domain-containing protein ACR11 OS=Arabidopsis thaliana OX=3702 GN=ACR11 PE=1 SV=1	S	Function unknown	ACT domain-containing protein ACR11 [Glycine max]	cellular component: cell (GO:0005623);; cellular component: organelle (GO:0043226);; cellular component: cell part (GO:0044464);; cellular component: membrane (GO:0016020);; cellular component: organelle part (GO:0044422)
gene-LOC100804554	10.0986	12.5551	9.55717	1.41109	1.32376	1.84718	4.13889e-06	-1.352	down	[O]	Posttranslational modification, protein turnover, chaperones	Cellular Component: cytoplasm (GO:0005737);; Cellular Component: chloroplast thylakoid membrane (GO:0009535);; Biological Process: protein refolding (GO:0042026);; Molecular Function: unfolded protein binding (GO:0051082);; Biological Process: chaperone mediated protein folding requiring cofactor (GO:0051085);;	K03686|5.5e-209|gmx:100804554|K03686 molecular chaperone DnaJ | (RefSeq) chaperone protein dnaJ A6, chloroplastic	--	[O]	Posttranslational modification, protein turnover, chaperones	DnaJ C terminal domain	Chaperone protein dnaJ A6, chloroplastic OS=Arabidopsis thaliana OX=3702 GN=DJA6 PE=2 SV=2	O	Posttranslational modification, protein turnover, chaperones	chaperone protein dnaJ A6, chloroplastic [Glycine max]	cellular component: cell (GO:0005623);; cellular component: cell part (GO:0044464);; cellular component: membrane (GO:0016020);; cellular component: organelle (GO:0043226);; cellular component: organelle part (GO:0044422);; biological process: cellular process (GO:0009987);; molecular function: binding (GO:0005488)
gene-LOC100804350	50.1518	97.5314	50.1189	5.20104	3.95289	4.6144	4.32938e-11	-2.38231	down	--	--	Molecular Function: peroxidase activity (GO:0004601);; Cellular Component: extracellular region (GO:0005576);; Biological Process: response to oxidative stress (GO:0006979);; Molecular Function: heme binding (GO:0020037);; Biological Process: hydrogen peroxide catabolic process (GO:0042744);; Molecular Function: metal ion binding (GO:0046872);;	K00430|6.8e-187|gmx:100804350|K00430 peroxidase [EC:1.11.1.7] | (RefSeq) uncharacterized protein LOC100804350 precursor	Phenylpropanoid biosynthesis (ko00940)	--	--	Peroxidase	Peroxidase 50 OS=Arabidopsis thaliana OX=3702 GN=PER50 PE=1 SV=1	Q	Secondary metabolites biosynthesis, transport and catabolism	uncharacterized protein LOC100804350 precursor [Glycine max]	molecular function: catalytic activity (GO:0003824);; molecular function: antioxidant activity (GO:0016209);; biological process: metabolic process (GO:0008152);; biological process: cellular process (GO:0009987);; biological process: single-organism process (GO:0044699);; biological process: response to stimulus (GO:0050896);; biological process: detoxification (GO:0098754);; cellular component:…
gene-LOC102667099	0.154774	0	0.073451	11.0855	3.61339	7.19582	2.25791e-35	7.50015	up	--	--	--	--	--	--	--	--	--	L	Replication, recombination and repair	uncharacterized protein LOC102667099 [Glycine max]	--
gene-LOC100791440	0.419661	0.528825	0.745512	0.594007	0.242328	2.13974	0.00561702	2.06595	up	[C]	Energy production and conversion	Molecular Function: FMN binding (GO:0010181);; Molecular Function: oxidoreductase activity (GO:0016491);;	K05894|2.4e-220|gmx:100791440|K05894 12-oxophytodienoic acid reductase [EC:1.3.1.42] | (RefSeq) putative 12-oxophytodienoate reductase 11	alpha-Linolenic acid metabolism (ko00592)	[CR]	Energy production and conversion;; General function prediction only	NADH:flavin oxidoreductase / NADH oxidase family	12-oxophytodienoate reductase 2 OS=Arabidopsis thaliana OX=3702 GN=OPR2 PE=1 SV=2	C	Energy production and conversion	putative 12-oxophytodienoate reductase 11 [Glycine max]	molecular function: binding (GO:0005488);; molecular function: catalytic activity (GO:0003824)
gene-LOC100811492	36.078	38.119	38.2714	0.426273	0.527387	0.690645	1.25565e-45	-4.57853	down	--	--	--	--	--	--	--	--	--	--	--	uncharacterized protein LOC100811492 [Glycine max]	--
Glycine_max_newGene_8689	254.592	423.999	277.562	388.237	108.2	431.453	0.00559236	1.28977	up	--	--	Molecular Function: metal ion binding (GO:0046872);;	--	--	[P]	Inorganic ion transport and metabolism	Metallothionein	Metallothionein-like protein 2 OS=Cicer arietinum OX=3827 PE=3 SV=2	S	Function unknown	metallothionein-like protein 2 [Glycine soja]	molecular function: binding (GO:0005488)
gene-LOC100804934	3.89968	8.31917	4.27125	0	0	0.031843	2.85461e-12	-6.40416	down	--	--	Biological Process: response to light stimulus (GO:0009416);; Cellular Component: photosystem I (GO:0009522);; Cellular Component: photosystem II (GO:0009523);; Cellular Component: chloroplast thylakoid membrane (GO:0009535);; Biological Process: photosynthesis, light harvesting in photosystem I (GO:0009768);; Cellular Component: integral component of membrane (GO:0016021);; Molecular Function: c…	K08911|1.2e-163|gmx:100804934|K08911 light-harvesting complex I chlorophyll a/b binding protein 5 | (RefSeq) photosystem I chlorophyll a/b-binding protein 5, chloroplastic	Photosynthesis - antenna proteins (ko00196)	--	--	Chlorophyll A-B binding protein	Photosystem I chlorophyll a/b-binding protein 5, chloroplastic OS=Arabidopsis thaliana OX=3702 GN=LHCA5 PE=1 SV=1	C	Energy production and conversion	photosystem I chlorophyll a/b-binding protein 5, chloroplastic [Glycine max]	biological process: response to stimulus (GO:0050896);; cellular component: cell (GO:0005623);; cellular component: membrane (GO:0016020);; cellular component: macromolecular complex (GO:0032991);; cellular component: membrane part (GO:0044425);; cellular component: cell part (GO:0044464);; cellular component: organelle (GO:0043226);; cellular component: organelle part (GO:0044422);; biological p…
gene-LOC100789903	7.94719	8.48185	7.50793	1.75314	0.800065	1.23208	2.48838e-05	-1.21099	down	--	--	Molecular Function: molecular_function (GO:0003674);; Molecular Function: GTPase activator activity (GO:0005096);; Molecular Function: binding (GO:0005488);; Molecular Function: protein binding (GO:0005515);; Cellular Component: cellular_component (GO:0005575);; Cellular Component: extracellular region (GO:0005576);; Cellular Component: intracellular (GO:0005622);; Cellular Component: cell (GO:00…	K20168|2.5e-37|bvg:104901989|K20168 TBC1 domain family member 15 | (RefSeq) TBC1 domain family member 15	--	[T]	Signal transduction mechanisms	Rab-GTPase-TBC domain	Rab GTPase-activating protein 22 OS=Arabidopsis thaliana OX=3702 GN=RABGAP22 PE=1 SV=1	T	Signal transduction mechanisms	TBC1 domain family member 15 isoform X1 [Glycine max]	molecular function: molecular function regulator (GO:0098772);; biological process: biological regulation (GO:0065007);; molecular function: binding (GO:0005488);; cellular component: extracellular region (GO:0005576);; cellular component: cell (GO:0005623);; cellular component: cell part (GO:0044464);; biological process: localization (GO:0051179)
Glycine_max_newGene_5574	6.9397	4.48954	6.59397	1.09909	0.47401	1.33697	0.00242846	-1.23945	down	--	--	Cellular Component: plasma membrane (GO:0005886);; Biological Process: protein transport (GO:0015031);; Cellular Component: integral component of membrane (GO:0016021);; Cellular Component: transport vesicle membrane (GO:0030658);;	K19995|2.8e-75|gmx:100777657|K19995 secretory carrier-associated membrane protein | (RefSeq) secretory carrier-associated membrane protein	--	[U]	Intracellular trafficking, secretion, and vesicular transport	SCAMP family	Putative secretory carrier-associated membrane protein 1 OS=Oryza sativa subsp. indica OX=39946 GN=SCAMP1 PE=3 SV=1	U	Intracellular trafficking, secretion, and vesicular transport	Secretory carrier-associated membrane protein 1 isoform B [Glycine soja]	cellular component: cell (GO:0005623);; cellular component: membrane (GO:0016020);; cellular component: cell part (GO:0044464);; biological process: localization (GO:0051179);; cellular component: membrane part (GO:0044425);; cellular component: organelle (GO:0043226);; cellular component: organelle part (GO:0044422)
gene-LOC100798943	2.40853	1.54069	3.20979	0	0	0.188144	0.00114986	-3.3026	down	--	--	--	--	--	--	--	--	--	--	--	uncharacterized protein LOC100798943 [Glycine max]	--
gene-LOC100808841	0.419614	2.29037	0.367046	3.03473	2.0106	2.62823	0.000257899	2.57188	up	[H]	Coenzyme transport and metabolism	Molecular Function: 3-methyl-2-oxobutanoate hydroxymethyltransferase activity (GO:0003864);; Molecular Function: methyltransferase activity (GO:0008168);; Biological Process: pantothenate biosynthetic process (GO:0015940);; Biological Process: methylation (GO:0032259);;	K00606|4.6e-197|gmx:100808841|K00606 3-methyl-2-oxobutanoate hydroxymethyltransferase [EC:2.1.2.11] | (RefSeq) LOW QUALITY PROTEIN: 3-methyl-2-oxobutanoate hydroxymethyltransferase 2, mitochondrial-like	Pantothenate and CoA biosynthesis (ko00770)	[H]	Coenzyme transport and metabolism	Ketopantoate hydroxymethyltransferase	3-methyl-2-oxobutanoate hydroxymethyltransferase 2, mitochondrial OS=Arabidopsis thaliana OX=3702 GN=KPHMT2 PE=1 SV=1	H	Coenzyme transport and metabolism	LOW QUALITY PROTEIN: 3-methyl-2-oxobutanoate hydroxymethyltransferase 2, mitochondrial-like [Glycine max]	molecular function: catalytic activity (GO:0003824);; biological process: metabolic process (GO:0008152);; biological process: cellular process (GO:0009987);; biological process: single-organism process (GO:0044699)
gene-LOC100800041	7.15874	12.3009	7.35575	10.6555	5.38023	10.252	0.000214114	1.35229	up	--	--	Molecular Function: chaperone binding (GO:0051087);;	--	--	[T]	Signal transduction mechanisms	BAG domain	BAG family molecular chaperone regulator 4 OS=Arabidopsis thaliana OX=3702 GN=BAG4 PE=1 SV=1	T	Signal transduction mechanisms	BAG domain-containing protein [Glycine max]	molecular function: binding (GO:0005488)
gene-LOC100784554	0.610659	1.21146	1.08792	0.022927	0.079476	0.111412	0.00946944	-2.01043	down	--	--	Cellular Component: integral component of membrane (GO:0016021);;	--	--	[E]	Amino acid transport and metabolism	Transmembrane amino acid transporter protein	Proline transporter 1 OS=Arabidopsis thaliana OX=3702 GN=PROT1 PE=1 SV=1	E	Amino acid transport and metabolism	proline transporter 2 isoform X1 [Glycine max]	cellular component: membrane (GO:0016020);; cellular component: membrane part (GO:0044425)
Glycine_max_newGene_5610	5.13616	3.68482	5.88372	0.548812	0.466772	0.982561	0.00273986	-1.37781	down	--	--	Molecular Function: protein kinase activity (GO:0004672);; Molecular Function: ATP binding (GO:0005524);; Cellular Component: integral component of membrane (GO:0016021);;	--	--	--	--	Leucine rich repeat	Probable LRR receptor-like serine/threonine-protein kinase At1g07650 OS=Arabidopsis thaliana OX=3702 GN=At1g07650 PE=1 SV=1	T	Signal transduction mechanisms	probable leucine-rich repeat receptor-like serine/threonine-protein kinase At3g14840 isoform X2 [Glycine soja]	molecular function: catalytic activity (GO:0003824);; biological process: metabolic process (GO:0008152);; biological process: cellular process (GO:0009987);; molecular function: binding (GO:0005488);; cellular component: membrane (GO:0016020);; cellular component: membrane part (GO:0044425)
gene-LOC100792688	101.824	249.108	115.139	0	0	0	2.38682e-39	-12.6506	down	[P]	Inorganic ion transport and metabolism	Molecular Function: ferroxidase activity (GO:0004322);; Molecular Function: copper ion binding (GO:0005507);; Cellular Component: plasma membrane (GO:0005886);; Biological Process: iron ion transport (GO:0006826);; Biological Process: lignin catabolic process (GO:0046274);; Cellular Component: apoplast (GO:0048046);; Molecular Function: hydroquinone:oxygen oxidoreductase activity (GO:0052716);; B…	K05909|0.0e+00|gmx:100792688|K05909 laccase [EC:1.10.3.2] | (RefSeq) laccase-2	--	[Q]	Secondary metabolites biosynthesis, transport and catabolism	Multicopper oxidase	Laccase-2 OS=Arabidopsis thaliana OX=3702 GN=LAC2 PE=2 SV=1	Q	Secondary metabolites biosynthesis, transport and catabolism	laccase-2 [Glycine max]	molecular function: catalytic activity (GO:0003824);; biological process: metabolic process (GO:0008152);; biological process: single-organism process (GO:0044699);; molecular function: binding (GO:0005488);; cellular component: cell (GO:0005623);; cellular component: membrane (GO:0016020);; cellular component: cell part (GO:0044464);; biological process: localization (GO:0051179);; biological pr…
gene-LOC102669261	5.86155	4.21676	6.12141	0	0	0	1.68811e-14	-8.53768	down	--	--	Molecular Function: protein binding (GO:0005515);;	K22184|0.0e+00|gmx:102669261|K22184 bromodomain-containing protein 9 | (RefSeq) uncharacterized protein LOC102669261 isoform X3	--	[R]	General function prediction only	Bromodomain	Transcription factor GTE10 OS=Arabidopsis thaliana OX=3702 GN=GTE10 PE=1 SV=2	S	Function unknown	uncharacterized protein LOC102669261 isoform X1 [Glycine max]	molecular function: binding (GO:0005488)
gene-LOC100800373	16.2117	18.168	13.5443	0.174371	0.228981	0.177096	1.25213e-41	-4.78566	down	--	--	Biological Process: protein glycosylation (GO:0006486);; Molecular Function: transferase activity, transferring glycosyl groups (GO:0016757);;	K18789|2.0e-205|gmx:100800373|K18789 xylogalacturonan beta-1,3-xylosyltransferase [EC:2.4.2.41] | (RefSeq) probable glycosyltransferase At3g42180 isoform X1	--	[GMW]	Carbohydrate transport and metabolism;; Cell wall/membrane/envelope biogenesis;; Extracellular structures	Exostosin family	Probable glycosyltransferase At3g42180 OS=Arabidopsis thaliana OX=3702 GN=At3g42180 PE=2 SV=2	--	--	probable glycosyltransferase At3g42180 isoform X2 [Glycine max]	biological process: metabolic process (GO:0008152);; biological process: cellular process (GO:0009987);; biological process: single-organism process (GO:0044699);; molecular function: catalytic activity (GO:0003824)
gene-LOC100499763	2.79296	4.38849	4.52298	4.57227	1.18613	11.8436	0.00587759	1.85746	up	--	--	Molecular Function: calcium ion binding (GO:0005509);;	K13448|2.9e-86|gmx:100499763|K13448 calcium-binding protein CML | (RefSeq) uncharacterized protein LOC100499763	Plant-pathogen interaction (ko04626)	[T]	Signal transduction mechanisms	EF hand	Calmodulin-like protein 30 OS=Arabidopsis thaliana OX=3702 GN=CML30 PE=2 SV=1	T	Signal transduction mechanisms	uncharacterized protein LOC100499763 [Glycine max]	molecular function: binding (GO:0005488)
gene-LOC100787084	5.13359	3.86865	6.0085	0.221017	0.305584	0.295893	3.60273e-15	-2.66118	down	[G]	Carbohydrate transport and metabolism	Molecular Function: beta-galactosidase activity (GO:0004565);; Cellular Component: cell wall (GO:0005618);; Cellular Component: vacuole (GO:0005773);; Biological Process: carbohydrate metabolic process (GO:0005975);; Molecular Function: carbohydrate binding (GO:0030246);;	K12309|1.9e-312|brp:103872148|K12309 beta-galactosidase [EC:3.2.1.23] | (RefSeq) beta-galactosidase 2	Galactose metabolism (ko00052);; Other glycan degradation (ko00511);; Glycosaminoglycan degradation (ko00531);; Sphingolipid metabolism (ko00600);; Glycosphingolipid biosynthesis - ganglio series (ko00604)	[G]	Carbohydrate transport and metabolism	Glycosyl hydrolases family 35	Beta-galactosidase 1 OS=Arabidopsis thaliana OX=3702 GN=BGAL1 PE=2 SV=1	G	Carbohydrate transport and metabolism	beta-galactosidase 1 [Glycine max]	molecular function: catalytic activity (GO:0003824);; cellular component: cell (GO:0005623);; cellular component: cell part (GO:0044464);; cellular component: organelle (GO:0043226);; biological process: metabolic process (GO:0008152);; molecular function: binding (GO:0005488)
gene-LOC100807391	9.61224	2.29122	10.7789	105.75	61.4294	50.7185	9.92293e-20	4.60374	up	--	--	--	--	--	--	--	Hydrophobic seed protein	36.4 kDa proline-rich protein OS=Solanum lycopersicum OX=4081 GN=TPRP-F1 PE=2 SV=1	S	Function unknown	36.4 kDa proline-rich protein [Glycine max]	--
gene-LOC100784335	6.3116	9.20502	6.48458	0.038437	0	0	1.24177e-15	-6.87112	down	--	--	Cellular Component: integral component of membrane (GO:0016021);;	--	--	--	--	--	--	--	--	uncharacterized protein LOC100784335 [Glycine max]	cellular component: membrane (GO:0016020);; cellular component: membrane part (GO:0044425)
gene-LOC100778056	5.56304	6.73996	6.99955	0.104458	0.082957	0.270293	1.01822e-17	-3.84732	down	[QV]	Secondary metabolites biosynthesis, transport and catabolism;; Defense mechanisms	Molecular Function: iron ion binding (GO:0005506);; Cellular Component: membrane (GO:0016020);; Cellular Component: integral component of membrane (GO:0016021);; Molecular Function: oxidoreductase activity, acting on paired donors, with incorporation or reduction of molecular oxygen, NAD(P)H as one donor, and incorporation of one atom of oxygen (GO:0016709);; Molecular Function: heme binding (GO:…	K23136|8.7e-160|gra:105769156|K23136 fraxetin 5-hydroxylase [EC:1.14.14.164] | (RefSeq) uncharacterized LOC105769156	--	[Q]	Secondary metabolites biosynthesis, transport and catabolism	Cytochrome P450	Cytochrome P450 82A4 OS=Glycine max OX=3847 GN=CYP82A4 PE=2 SV=1	Q	Secondary metabolites biosynthesis, transport and catabolism	hypothetical protein GLYMA_01G135200 [Glycine max]	molecular function: binding (GO:0005488);; cellular component: membrane (GO:0016020);; cellular component: membrane part (GO:0044425);; molecular function: catalytic activity (GO:0003824);; biological process: metabolic process (GO:0008152);; biological process: single-organism process (GO:0044699);; biological process: response to stimulus (GO:0050896);; biological process: multi-organism proces…
gene-LOC100809281	1.71785	1.51839	2.08316	167.453	121.163	145.054	0	7.75857	up	--	--	Cellular Component: cellular_component (GO:0005575);; Cellular Component: intracellular (GO:0005622);; Cellular Component: cell (GO:0005623);; Cellular Component: nucleus (GO:0005634);; Cellular Component: nucleolus (GO:0005730);; Cellular Component: cytoplasm (GO:0005737);; Cellular Component: cytosol (GO:0005829);; Biological Process: cellular ion homeostasis (GO:0006873);; Biological Process: …	K10779|8.2e-10|smo:SELMODRAFT_443867|K10779 transcriptional regulator ATRX [EC:3.6.4.12] | (RefSeq) hypothetical protein	--	--	--	Seed maturation protein	Late embryogenesis abundant protein D-34 OS=Gossypium hirsutum OX=3635 PE=3 SV=1	S	Function unknown	late embryogenesis abundant protein D-34 [Glycine max]	cellular component: cell (GO:0005623);; cellular component: cell part (GO:0044464);; cellular component: organelle (GO:0043226);; cellular component: organelle part (GO:0044422);; biological process: cellular process (GO:0009987);; biological process: single-organism process (GO:0044699);; biological process: biological regulation (GO:0065007);; biological process: multicellular organismal proces…
Glycine_max_newGene_190	0.380314	0.571656	0.335085	0	0.013643	0	8.81803e-05	-3.97231	down	--	--	--	--	--	--	--	--	--	--	--	--	--
gene-LOC100527333	78.4868	73.9534	85.1772	0.101352	0.121691	0.036137	7.55448e-67	-7.9235	down	[G]	Carbohydrate transport and metabolism	Molecular Function: channel activity (GO:0015267);; Cellular Component: integral component of membrane (GO:0016021);;	K09873|1.6e-132|gmx:100527333|K09873 aquaporin TIP | (RefSeq) uncharacterized protein LOC100527333	--	[G]	Carbohydrate transport and metabolism	Major intrinsic protein	Probable aquaporin TIP2-2 OS=Arabidopsis thaliana OX=3702 GN=TIP2-2 PE=1 SV=2	G	Carbohydrate transport and metabolism	aquaporin TIP2-2 [Glycine max]	molecular function: transporter activity (GO:0005215);; biological process: localization (GO:0051179);; cellular component: membrane (GO:0016020);; cellular component: membrane part (GO:0044425)
gene-LOC102669928	1.95814	0.921959	1.11372	3.27792	1.68393	0.656924	0.00277033	1.87038	up	[IR]	Lipid transport and metabolism;; General function prediction only	Molecular Function: hydrolase activity, acting on ester bonds (GO:0016788);;	K00679|2.6e-46|cic:CICLE_v10027727mg|K00679 phospholipid:diacylglycerol acyltransferase [EC:2.3.1.158] | (RefSeq) hypothetical protein	Glycerolipid metabolism (ko00561)	--	--	GDSL-like Lipase/Acylhydrolase	GDSL esterase/lipase At1g71691 OS=Arabidopsis thaliana OX=3702 GN=At1g71691 PE=2 SV=1	I	Lipid transport and metabolism	GDSL esterase/lipase At1g71691 [Glycine max]	molecular function: catalytic activity (GO:0003824)
gene-LOC100775182	17.4731	13.5432	19.5429	16.675	12.5658	15.2116	5.05059e-10	1.26388	up	[R]	General function prediction only	Molecular Function: oxidoreductase activity (GO:0016491);;	K00121|2.1e-47|cme:CYME_CMS125C|K00121 S-(hydroxymethyl)glutathione dehydrogenase / alcohol dehydrogenase [EC:1.1.1.284 1.1.1.1] | (RefSeq) alcohol dehydrogenase class III	Glycolysis / Gluconeogenesis (ko00010);; Fatty acid degradation (ko00071);; Tyrosine metabolism (ko00350);; Carbon metabolism (ko01200)	[Q]	Secondary metabolites biosynthesis, transport and catabolism	Zinc-binding dehydrogenase	CYP enzymes assisting alcohol dehydrogenase OS=Catharanthus roseus OX=4058 GN=CYPADH PE=1 SV=1	Q	Secondary metabolites biosynthesis, transport and catabolism	uncharacterized protein LOC100775182 [Glycine max]	molecular function: catalytic activity (GO:0003824)
gene-LOC100797835	1.07875	1.05404	0.961244	0	0	0	4.03017e-07	-6.401	down	[P]	Inorganic ion transport and metabolism	Cellular Component: plasma membrane (GO:0005886);; Molecular Function: cation transmembrane transporter activity (GO:0008324);; Molecular Function: sodium ion transmembrane transporter activity (GO:0015081);; Cellular Component: integral component of membrane (GO:0016021);;	--	--	[P]	Inorganic ion transport and metabolism	Cation transport protein	Probable cation transporter HKT6 OS=Oryza sativa subsp. japonica OX=39947 GN=HKT6 PE=2 SV=2	P	Inorganic ion transport and metabolism	sodium transporter HKT1 [Glycine max]	cellular component: cell (GO:0005623);; cellular component: membrane (GO:0016020);; cellular component: cell part (GO:0044464);; molecular function: transporter activity (GO:0005215);; biological process: localization (GO:0051179);; cellular component: membrane part (GO:0044425)
gene-LOC100783823	1.10368	1.30707	0.859454	0.072404	0.042746	0.190393	0.00997716	-1.83199	down	--	--	Cellular Component: integral component of membrane (GO:0016021);;	K10664|3.5e-200|gmx:100783823|K10664 E3 ubiquitin-protein ligase ATL6/9/15/31/42/55 [EC:2.3.2.27] | (RefSeq) E3 ubiquitin-protein ligase ATL6	--	[O]	Posttranslational modification, protein turnover, chaperones	Ring finger domain	E3 ubiquitin-protein ligase ATL6 OS=Arabidopsis thaliana OX=3702 GN=ATL6 PE=1 SV=2	O	Posttranslational modification, protein turnover, chaperones	E3 ubiquitin-protein ligase ATL6 [Glycine max]	cellular component: membrane (GO:0016020);; cellular component: membrane part (GO:0044425)
gene-LOC100781444	16.0766	16.8098	15.6419	24.9941	12.5965	21.8166	2.74727e-13	1.69557	up	--	--	--	--	--	--	--	--	--	--	--	uncharacterized protein LOC100781444 [Glycine max]	--
gene-LOC100779967	1.12573	0.974483	1.92027	0	0	0	5.66483e-07	-6.3664	down	[QV]	Secondary metabolites biosynthesis, transport and catabolism;; Defense mechanisms	Molecular Function: monooxygenase activity (GO:0004497);; Molecular Function: iron ion binding (GO:0005506);; Molecular Function: oxidoreductase activity, acting on paired donors, with incorporation or reduction of molecular oxygen (GO:0016705);; Molecular Function: heme binding (GO:0020037);;	K09590|1.3e-295|gmx:100779967|K09590 brassinosteroid-6-oxidase 1 [EC:1.14.-.-] | (RefSeq) cytochrome P450 85A	Brassinosteroid biosynthesis (ko00905)	[QI]	Secondary metabolites biosynthesis, transport and catabolism;; Lipid transport and metabolism	Cytochrome P450	Cytochrome P450 85A OS=Phaseolus vulgaris OX=3885 GN=BA13 PE=3 SV=2	Q	Secondary metabolites biosynthesis, transport and catabolism	cytochrome P450 85A [Glycine max]	molecular function: catalytic activity (GO:0003824);; biological process: metabolic process (GO:0008152);; biological process: single-organism process (GO:0044699);; molecular function: binding (GO:0005488)
Glycine_max_newGene_11324	2.52278	2.74363	2.83554	0.481011	0.312175	0.429127	0.00783598	-1.02258	down	--	--	--	--	--	--	--	--	--	--	--	--	--
gene-LOC100802734	1.17376	0.772541	1.09889	4.00432	5.87967	2.54687	6.1619e-14	3.4736	up	--	--	Molecular Function: DNA binding (GO:0003677);; Cellular Component: nucleus (GO:0005634);;	K09287|3.9e-37|sbi:8061113|K09287 RAV-like factor | (RefSeq) AP2/ERF and B3 domain-containing protein Os05g0549800	--	--	--	B3 DNA binding domain	B3 domain-containing protein At2g36080 OS=Arabidopsis thaliana OX=3702 GN=ARF31 PE=2 SV=1	K	Transcription	B3 domain-containing protein At2g36080 [Glycine max]	molecular function: binding (GO:0005488);; cellular component: cell (GO:0005623);; cellular component: organelle (GO:0043226);; cellular component: cell part (GO:0044464)
Glycine_max_newGene_5761	97.0873	57.3011	101.359	12.7434	8.3153	3.18537	0.000202873	-1.85599	down	--	--	--	--	--	--	--	--	--	--	--	uncharacterized protein LOC100816159 precursor [Glycine max]	--
gene-LOC100805685	2.23322	2.63909	2.54377	0.047237	0.06998	0.08719	1.42355e-17	-3.59028	down	[R]	General function prediction only	Biological Process: signal transduction (GO:0007165);; Molecular Function: ADP binding (GO:0043531);;	K00695|3.7e-186|mtr:MTR_6g478030|K00695 sucrose synthase [EC:2.4.1.13] | (RefSeq) sucrose synthase	Starch and sucrose metabolism (ko00500)	--	--	TIR domain	Disease resistance protein Roq1 OS=Nicotiana benthamiana OX=4100 GN=ROQ1 PE=1 SV=1	J	Translation, ribosomal structure and biogenesis	TMV resistance protein N [Glycine max]	biological process: cellular process (GO:0009987);; biological process: biological regulation (GO:0065007);; molecular function: binding (GO:0005488)
gene-LOC100799577	17.3792	11.9667	16.0764	14.2956	15.7995	10.6997	2.96292e-05	1.33059	up	--	--	Cellular Component: cytoplasm (GO:0005737);;	K09527|3.8e-107|pop:7468901|K09527 DnaJ homolog subfamily C member 7 | (RefSeq) TPR repeat-containing thioredoxin TTL1	--	[R]	General function prediction only	Tetratricopeptide repeat	TPR repeat-containing thioredoxin TTL1 OS=Arabidopsis thaliana OX=3702 GN=TTL1 PE=1 SV=1	O	Posttranslational modification, protein turnover, chaperones	TPR repeat-containing thioredoxin TTL1 [Glycine max]	cellular component: cell (GO:0005623);; cellular component: cell part (GO:0044464)
gene-LOC100798089	78.3578	57.7333	75.5776	75.6718	60.6414	61.5036	8.49946e-11	1.35959	up	[J]	Translation, ribosomal structure and biogenesis	Molecular Function: mRNA binding (GO:0003729);; Cellular Component: cytosol (GO:0005829);;	K13201|1.1e-40|csl:COCSUDRAFT_20324|K13201 nucleolysin TIA-1/TIAR | (RefSeq) RNA-binding domain-containing protein	--	[R]	General function prediction only	RNA recognition motif. (a.k.a. RRM, RBD, or RNP domain)	Polyadenylate-binding protein RBP47 OS=Nicotiana plumbaginifolia OX=4092 GN=RBP47 PE=1 SV=1	A	RNA processing and modification	polyadenylate-binding protein RBP47 [Glycine max]	molecular function: binding (GO:0005488);; cellular component: cell (GO:0005623);; cellular component: cell part (GO:0044464)
gene-GPRP3	43.1656	36.2431	46.8663	101.732	64.183	97.2396	1.64037e-43	2.4859	up	--	--	--	--	--	--	--	--	--	S	Function unknown	uncharacterized protein LOC100780885 [Glycine max]	--
gene-LOC100813592	93.0344	139.963	96.4872	1.9461	3.31116	0.322731	6.37983e-10	-4.11972	down	[GI]	Carbohydrate transport and metabolism;; Lipid transport and metabolism	Molecular Function: pectinesterase activity (GO:0030599);; Biological Process: cell wall modification (GO:0042545);; Molecular Function: aspartyl esterase activity (GO:0045330);; Biological Process: pectin catabolic process (GO:0045490);; Molecular Function: pectinesterase inhibitor activity (GO:0046910);;	K01051|0.0e+00|gmx:100813592|K01051 pectinesterase [EC:3.1.1.11] | (RefSeq) pectinesterase	Pentose and glucuronate interconversions (ko00040)	--	--	Pectinesterase	Probable pectinesterase/pectinesterase inhibitor 39 OS=Arabidopsis thaliana OX=3702 GN=PME39 PE=2 SV=1	G	Carbohydrate transport and metabolism	pectinesterase [Glycine max]	molecular function: catalytic activity (GO:0003824);; biological process: cellular process (GO:0009987);; biological process: cellular component organization or biogenesis (GO:0071840);; biological process: metabolic process (GO:0008152);; molecular function: molecular function regulator (GO:0098772);; biological process: biological regulation (GO:0065007)
gene-LOC100798355	7.56527	17.8201	7.64141	1.6399	1.72257	0.836615	0.00661904	-1.45544	down	[O]	Posttranslational modification, protein turnover, chaperones	Molecular Function: ATP-dependent peptidase activity (GO:0004176);; Molecular Function: metalloendopeptidase activity (GO:0004222);; Molecular Function: ATP binding (GO:0005524);; Biological Process: proteolysis (GO:0006508);; Molecular Function: zinc ion binding (GO:0008270);; Cellular Component: chloroplast thylakoid membrane (GO:0009535);; Cellular Component: chloroplast envelope (GO:0009941);…	K03798|0.0e+00|gmx:100798355|K03798 cell division protease FtsH [EC:3.4.24.-] | (RefSeq) ATP-dependent zinc metalloprotease FTSH 2, chloroplastic isoform X2	--	[O]	Posttranslational modification, protein turnover, chaperones	Peptidase family M41	ATP-dependent zinc metalloprotease FTSH 2, chloroplastic OS=Oryza sativa subsp. japonica OX=39947 GN=FTSH2 PE=3 SV=1	O	Posttranslational modification, protein turnover, chaperones	ATP-dependent zinc metalloprotease FTSH 2, chloroplastic isoform X2 [Glycine max]	molecular function: catalytic activity (GO:0003824);; biological process: metabolic process (GO:0008152);; molecular function: binding (GO:0005488);; cellular component: cell (GO:0005623);; cellular component: membrane (GO:0016020);; cellular component: organelle (GO:0043226);; cellular component: organelle part (GO:0044422);; cellular component: cell part (GO:0044464);; biological process: cellu…
gene-LOC100818188	46.4935	43.9966	46.8619	2.89997	1.94012	4.68902	1.96465e-16	-2.39502	down	[I]	Lipid transport and metabolism	Molecular Function: 3-hydroxyisobutyryl-CoA hydrolase activity (GO:0003860);;	K05605|2.7e-219|gmx:100818188|K05605 3-hydroxyisobutyryl-CoA hydrolase [EC:3.1.2.4] | (RefSeq) uncharacterized protein LOC100818188	Valine, leucine and isoleucine degradation (ko00280);; beta-Alanine metabolism (ko00410);; Propanoate metabolism (ko00640);; Carbon metabolism (ko01200)	--	--	Enoyl-CoA hydratase/isomerase	3-hydroxyisobutyryl-CoA hydrolase-like protein 5 OS=Arabidopsis thaliana OX=3702 GN=At1g06550 PE=1 SV=2	I	Lipid transport and metabolism	3-hydroxyisobutyryl-CoA hydrolase-like protein isoform 1 [Glycine max]	molecular function: catalytic activity (GO:0003824)
gene-LOC100789773	0.160642	0.68942	0.466253	2.1717	1.07905	1.21805	1.60923e-07	3.04498	up	--	--	Cellular Component: integral component of membrane (GO:0016021);;	--	--	[S]	Function unknown	Protein of unknown function (DUF2838)	Glycerophosphocholine acyltransferase 1 OS=Ricinus communis OX=3988 GN=GPC1 PE=1 SV=1	S	Function unknown	uncharacterized membrane protein C776.05 [Glycine max]	cellular component: membrane (GO:0016020);; cellular component: membrane part (GO:0044425)
gene-LOC100807452	35.9518	28.3057	40.5072	44.1186	33.3253	53.1382	2.58345e-16	1.75371	up	--	--	Cellular Component: endoplasmic reticulum (GO:0005783);; Cellular Component: endomembrane system (GO:0012505);; Cellular Component: membrane (GO:0016020);; Cellular Component: integral component of membrane (GO:0016021);;	K17278|2.2e-120|gmx:100807452|K17278 membrane-associated progesterone receptor component | (RefSeq) membrane steroid-binding protein 1	--	[R]	General function prediction only	Cytochrome b5-like Heme/Steroid binding domain	Membrane steroid-binding protein 1 OS=Oryza sativa subsp. japonica OX=39947 GN=MSBP1 PE=1 SV=1	J	Translation, ribosomal structure and biogenesis	membrane steroid-binding protein 1 [Glycine max]	cellular component: cell (GO:0005623);; cellular component: organelle (GO:0043226);; cellular component: cell part (GO:0044464);; cellular component: membrane (GO:0016020);; cellular component: membrane part (GO:0044425)
gene-LOC100816560	1.55597	1.71325	1.6481	3.91933	3.99949	1.12403	1.03849e-05	2.31663	up	--	--	Cellular Component: integral component of membrane (GO:0016021);; Molecular Function: oxidoreductase activity (GO:0016491);;	K00521|0.0e+00|gmx:100816560|K00521 ferric-chelate reductase [EC:1.16.1.7] | (RefSeq) ferric reduction oxidase 8, mitochondrial	--	[PQ]	Inorganic ion transport and metabolism;; Secondary metabolites biosynthesis, transport and catabolism	Ferric reductase NAD binding domain	Ferric reduction oxidase 8, mitochondrial OS=Arabidopsis thaliana OX=3702 GN=FRO8 PE=1 SV=1	--	--	ferric reduction oxidase 8, mitochondrial [Glycine max]	cellular component: membrane (GO:0016020);; cellular component: membrane part (GO:0044425);; molecular function: catalytic activity (GO:0003824)
gene-LOC778120	2.25281	1.86258	1.81574	5.85368	3.78204	4.43244	1.63934e-27	2.66555	up	--	--	Molecular Function: DNA binding (GO:0003677);; Molecular Function: transcription factor activity, sequence-specific DNA binding (GO:0003700);; Cellular Component: nucleus (GO:0005634);;	K16222|7.3e-39|dct:110107877|K16222 Dof zinc finger protein DOF5.5 | (RefSeq) cyclic dof factor 1 isoform X1	Circadian rhythm - plant (ko04712)	--	--	Dof domain, zinc finger	Cyclic dof factor 2 OS=Arabidopsis thaliana OX=3702 GN=CDF2 PE=1 SV=2	K	Transcription	C2C2-Zn Dof transcription factor [Glycine max]	molecular function: binding (GO:0005488);; molecular function: nucleic acid binding transcription factor activity (GO:0001071);; biological process: biological regulation (GO:0065007);; cellular component: cell (GO:0005623);; cellular component: organelle (GO:0043226);; cellular component: cell part (GO:0044464)
gene-LOC100812838	1.60609	1.7303	1.35099	0.078842	0	0.069489	5.57971e-06	-3.18947	down	[I]	Lipid transport and metabolism	Biological Process: catabolic process (GO:0009056);; Biological Process: pollen tube growth (GO:0009860);; Molecular Function: hydrolase activity (GO:0016787);; Molecular Function: carboxylic ester hydrolase activity (GO:0052689);;	K14493|1.7e-66|gab:108469672|K14493 gibberellin receptor GID1 [EC:3.-.-.-] | (RefSeq) gibberellin receptor GID1C	Plant hormone signal transduction (ko04075)	[V]	Defense mechanisms	alpha/beta hydrolase fold	Probable carboxylesterase 18 OS=Arabidopsis thaliana OX=3702 GN=CXE18 PE=1 SV=1	V	Defense mechanisms	probable carboxylesterase 18 [Glycine max]	biological process: metabolic process (GO:0008152);; biological process: reproduction (GO:0000003);; biological process: cellular process (GO:0009987);; biological process: reproductive process (GO:0022414);; biological process: developmental process (GO:0032502);; biological process: growth (GO:0040007);; biological process: single-organism process (GO:0044699);; biological process: cellular com…
gene-LOC100803710	2.0923	7.85666	2.18708	0.028707	0	0	1.25868e-10	-6.35473	down	[M]	Cell wall/membrane/envelope biogenesis	Molecular Function: transferase activity, transferring glycosyl groups (GO:0016757);;	--	--	--	--	Glycosyltransferase family 9 (heptosyltransferase)	Photosynthetic NDH subunit of subcomplex B 1, chloroplastic OS=Arabidopsis thaliana OX=3702 GN=PNSB1 PE=2 SV=1	M	Cell wall/membrane/envelope biogenesis	photosynthetic NDH subunit of subcomplex B 1, chloroplastic [Glycine max]	molecular function: catalytic activity (GO:0003824)
gene-LOC102669626	0.777258	1.81057	0.60806	0	0	0	8.41409e-06	-5.91476	down	[L]	Replication, recombination and repair	Molecular Function: catalytic activity (GO:0003824);; Biological Process: DNA repair (GO:0006281);;	--	--	--	--	--	--	--	--	uncharacterized protein LOC102669626 [Glycine max]	molecular function: catalytic activity (GO:0003824);; biological process: metabolic process (GO:0008152);; biological process: cellular process (GO:0009987);; biological process: response to stimulus (GO:0050896)
gene-LOC100780302	7.53636	12.7164	7.5085	8.97384	6.93081	6.0549	0.00259252	1.06879	up	--	--	Molecular Function: RNA binding (GO:0003723);; Molecular Function: ubiquitin-protein transferase activity (GO:0004842);; Cellular Component: CCR4-NOT complex (GO:0030014);;	K10643|0.0e+00|gmx:100780302|K10643 CCR4-NOT transcription complex subunit 4 [EC:2.3.2.27] | (RefSeq) uncharacterized protein LOC100780302 isoform X3	RNA degradation (ko03018)	[K]	Transcription	RING/Ubox like zinc-binding domain	--	A	RNA processing and modification	uncharacterized protein LOC100780302 isoform X2 [Glycine max]	molecular function: binding (GO:0005488);; molecular function: catalytic activity (GO:0003824);; cellular component: cell (GO:0005623);; cellular component: macromolecular complex (GO:0032991);; cellular component: cell part (GO:0044464)
gene-LOC100796821	2.68548	1.46486	2.91937	0.084034	0.05653	0.116444	3.31817e-12	-3.10707	down	[T]	Signal transduction mechanisms	Molecular Function: protein serine/threonine kinase activity (GO:0004674);; Molecular Function: ATP binding (GO:0005524);; Cellular Component: plasma membrane (GO:0005886);; Biological Process: protein phosphorylation (GO:0006468);; Cellular Component: integral component of membrane (GO:0016021);; Biological Process: recognition of pollen (GO:0048544);;	K24104|7.6e-70|thj:104799061|K24104 GPN-loop GTPase | (RefSeq) LOW QUALITY PROTEIN: uncharacterized protein LOC104799061	--	--	--	Protein tyrosine and serine/threonine kinase	G-type lectin S-receptor-like serine/threonine-protein kinase At4g27290 OS=Arabidopsis thaliana OX=3702 GN=At4g27290 PE=3 SV=4	--	--	G-type lectin S-receptor-like serine/threonine-protein kinase At4g27290 isoform X1 [Glycine max]	molecular function: catalytic activity (GO:0003824);; biological process: metabolic process (GO:0008152);; biological process: cellular process (GO:0009987);; molecular function: binding (GO:0005488);; cellular component: cell (GO:0005623);; cellular component: membrane (GO:0016020);; cellular component: cell part (GO:0044464);; cellular component: membrane part (GO:0044425);; biological process:…
gene-LOC100779288	2.80427	5.32335	4.36219	0.869331	0.472836	0.452844	0.00373834	-1.34333	down	[R]	General function prediction only	Molecular Function: cysteine-type endopeptidase activity (GO:0004197);;	K22684|1.3e-218|gmx:100779288|K22684 metacaspase-1 [EC:3.4.22.-] | (RefSeq) metacaspase-3	--	[DO]	Cell cycle control, cell division, chromosome partitioning;; Posttranslational modification, protein turnover, chaperones	Caspase domain	Metacaspase-1 OS=Arabidopsis thaliana OX=3702 GN=AMC1 PE=1 SV=1	--	--	metacaspase-3 [Glycine max]	molecular function: catalytic activity (GO:0003824);; biological process: metabolic process (GO:0008152)
gene-LOC100813910	14.444	20.7072	18.8914	0.505386	0.507396	0.679006	5.91631e-29	-3.49695	down	--	--	Cellular Component: plant-type cell wall (GO:0009505);;	K03097|2.7e-11|aip:107623262|K03097 casein kinase II subunit alpha [EC:2.7.11.1] | (RefSeq) casein kinase II subunit alpha-like isoform X2	Ribosome biogenesis in eukaryotes (ko03008);; Circadian rhythm - plant (ko04712)	--	--	Protein of unknown function (DUF642)	--	S	Function unknown	uncharacterized protein LOC100813910 [Glycine max]	cellular component: cell (GO:0005623);; cellular component: cell part (GO:0044464)
gene-LOC100778677	52.6902	14.8265	57.5133	4.20465	4.53534	4.8734	0.000572589	-1.66347	down	[O]	Posttranslational modification, protein turnover, chaperones	Molecular Function: ATP binding (GO:0005524);; Cellular Component: cytosol (GO:0005829);; Biological Process: protein folding (GO:0006457);; Biological Process: response to heat (GO:0009408);; Molecular Function: heat shock protein binding (GO:0031072);; Molecular Function: metal ion binding (GO:0046872);; Molecular Function: unfolded protein binding (GO:0051082);;	K09503|3.7e-238|gmx:100778677|K09503 DnaJ homolog subfamily A member 2 | (RefSeq) dnaJ protein homolog	Protein processing in endoplasmic reticulum (ko04141)	[O]	Posttranslational modification, protein turnover, chaperones	DnaJ C terminal domain	DnaJ protein homolog ANJ1 OS=Atriplex nummularia OX=3553 PE=2 SV=1	O	Posttranslational modification, protein turnover, chaperones	dnaJ protein homolog [Glycine max]	molecular function: binding (GO:0005488);; cellular component: cell (GO:0005623);; cellular component: cell part (GO:0044464);; biological process: cellular process (GO:0009987);; biological process: response to stimulus (GO:0050896)
gene-LOC100799583	8.66804	10.0721	9.8476	0.200257	0	0.209843	4.39834e-17	-4.52999	down	[GEPR]	Carbohydrate transport and metabolism;; Amino acid transport and metabolism;; Inorganic ion transport and metabolism;; General function prediction only	Cellular Component: integral component of membrane (GO:0016021);; Molecular Function: transmembrane transporter activity (GO:0022857);;	K12818|3.0e-90|smo:SELMODRAFT_429199|K12818 ATP-dependent RNA helicase DHX8/PRP22 [EC:3.6.4.13] | (RefSeq) hypothetical protein	Spliceosome (ko03040)	[R]	General function prediction only	Major Facilitator Superfamily	Protein ZINC INDUCED FACILITATOR-LIKE 1 OS=Arabidopsis thaliana OX=3702 GN=ZIFL1 PE=2 SV=1	S	Function unknown	protein ZINC INDUCED FACILITATOR-LIKE 1 [Glycine max]	cellular component: membrane (GO:0016020);; cellular component: membrane part (GO:0044425);; molecular function: transporter activity (GO:0005215);; biological process: localization (GO:0051179)
gene-LOC100801056	3.66588	2.76604	3.67918	0.295726	0.08922	0.567646	0.000584911	-1.92824	down	--	--	Molecular Function: nucleoside transmembrane transporter activity (GO:0005337);; Cellular Component: integral component of membrane (GO:0016021);;	K15014|3.1e-237|gmx:100801056|K15014 solute carrier family 29 (equilibrative nucleoside transporter), member 1/2/3 | (RefSeq) equilibrative nucleotide transporter 3	--	[F]	Nucleotide transport and metabolism	Nucleoside transporter	Equilibrative nucleotide transporter 3 OS=Arabidopsis thaliana OX=3702 GN=ENT3 PE=1 SV=1	F	Nucleotide transport and metabolism	equilibrative nucleotide transporter 3 [Glycine max]	molecular function: transporter activity (GO:0005215);; biological process: single-organism process (GO:0044699);; biological process: localization (GO:0051179);; cellular component: membrane (GO:0016020);; cellular component: membrane part (GO:0044425)
gene-LOC100500579	13.3507	23.0479	9.9219	0.180205	0	0.032985	1.16815e-17	-5.80848	down	--	--	Molecular Function: endopeptidase inhibitor activity (GO:0004866);;	--	--	--	--	Trypsin and protease inhibitor	Trypsin inhibitor A OS=Glycine max OX=3847 GN=KTI3 PE=1 SV=2	--	--	kunitz-type trypsin inhibitor precursor [Glycine max]	molecular function: molecular function regulator (GO:0098772);; biological process: biological regulation (GO:0065007)
gene-LOC100802293	1.73978	3.21406	2.02637	0.265525	0.292352	0.154888	0.000817258	-1.74812	down	[T]	Signal transduction mechanisms	Biological Process: defense response to oomycetes (GO:0002229);; Molecular Function: transmembrane receptor protein serine/threonine kinase activity (GO:0004675);; Molecular Function: ATP binding (GO:0005524);; Cellular Component: plasma membrane (GO:0005886);; Biological Process: defense response (GO:0006952);; Cellular Component: integral component of membrane (GO:0016021);; Molecular Function:…	K01176|1.8e-69|sbi:8065370|K01176 alpha-amylase [EC:3.2.1.1] | (RefSeq) alpha-amylase isozyme 2A	Starch and sucrose metabolism (ko00500)	--	--	Legume lectin domain	L-type lectin-domain containing receptor kinase IV.1 OS=Arabidopsis thaliana OX=3702 GN=LECRK41 PE=2 SV=1	T	Signal transduction mechanisms	L-type lectin-domain containing receptor kinase IV.1 [Glycine max]	biological process: response to stimulus (GO:0050896);; biological process: multi-organism process (GO:0051704);; molecular function: catalytic activity (GO:0003824);; molecular function: signal transducer activity (GO:0004871);; molecular function: molecular transducer activity (GO:0060089);; biological process: metabolic process (GO:0008152);; biological process: cellular process (GO:0009987);;…
gene-LOC100779439	18.0315	14.0499	18.7796	13.7126	16.7295	9.43591	0.00155265	1.14574	up	--	--	Molecular Function: nucleic acid binding (GO:0003676);; Biological Process: gene silencing by RNA (GO:0031047);;	K11593|0.0e+00|gmx:100779439|K11593 eukaryotic translation initiation factor 2C | (RefSeq) protein argonaute 4	--	[J]	Translation, ribosomal structure and biogenesis	Piwi domain	Protein argonaute 4 OS=Arabidopsis thaliana OX=3702 GN=AGO4 PE=1 SV=2	J	Translation, ribosomal structure and biogenesis	protein argonaute 4 [Glycine max]	molecular function: binding (GO:0005488);; biological process: cellular process (GO:0009987);; biological process: single-organism process (GO:0044699);; biological process: biological regulation (GO:0065007)
gene-LOC100820623	10.3892	6.74203	10.212	7.22981	6.89417	9.4398	1.32417e-06	1.25951	up	[H]	Coenzyme transport and metabolism	Molecular Function: methyltransferase activity (GO:0008168);; Cellular Component: integral component of membrane (GO:0016021);; Biological Process: methylation (GO:0032259);;	K23872|7.1e-142|egu:105043413|K23872 putative homogalacturonan methyltransferase [EC:2.1.1.-] | (RefSeq) probable methyltransferase PMT13 isoform X1	--	--	--	Putative S-adenosyl-L-methionine-dependent methyltransferase	Probable methyltransferase PMT20 OS=Arabidopsis thaliana OX=3702 GN=At1g31850 PE=2 SV=1	S	Function unknown	probable methyltransferase PMT20 [Glycine max]	molecular function: catalytic activity (GO:0003824);; cellular component: membrane (GO:0016020);; cellular component: membrane part (GO:0044425);; biological process: metabolic process (GO:0008152)
gene-LOC100806672	6.97196	5.22242	3.70898	22.1696	15.6473	21.088	2.08036e-31	3.29607	up	[Q]	Secondary metabolites biosynthesis, transport and catabolism	Molecular Function: oxidoreductase activity (GO:0016491);; Molecular Function: metal ion binding (GO:0046872);;	K24028|5.5e-57|aof:109828012|K24028 salicylic acid 3-hydroxylase [EC:1.14.11.-] | (RefSeq) protein DMR6-LIKE OXYGENASE 2-like	--	[QR]	Secondary metabolites biosynthesis, transport and catabolism;; General function prediction only	2OG-Fe(II) oxygenase superfamily	Protein DMR6-LIKE OXYGENASE 2 OS=Arabidopsis thaliana OX=3702 GN=DLO2 PE=2 SV=1	Q	Secondary metabolites biosynthesis, transport and catabolism	protein DMR6-LIKE OXYGENASE 2 [Glycine max]	molecular function: catalytic activity (GO:0003824);; molecular function: binding (GO:0005488)
gene-LOC547684	57.1298	29.9867	62.7258	1.68079	1.81965	3.36117	3.35967e-15	-2.93839	down	[G]	Carbohydrate transport and metabolism	Biological Process: polysaccharide catabolic process (GO:0000272);; Molecular Function: beta-amylase activity (GO:0016161);; Molecular Function: amylopectin maltohydrolase activity (GO:0102229);;	K01177|8.1e-97|psom:113302616|K01177 beta-amylase [EC:3.2.1.2] | (RefSeq) beta-amylase 3, chloroplastic-like	Starch and sucrose metabolism (ko00500)	--	--	Glycosyl hydrolase family 14	Inactive beta-amylase 9 OS=Arabidopsis thaliana OX=3702 GN=BAM9 PE=2 SV=1	G	Carbohydrate transport and metabolism	beta-amylase [Glycine max]	biological process: metabolic process (GO:0008152);; molecular function: catalytic activity (GO:0003824)
gene-LOC100790956	0.084494	0.05695	0	0.891637	0.625522	0.389122	1.35117e-10	4.81463	up	--	--	Cellular Component: plasma membrane (GO:0005886);;	--	--	--	--	--	Uncharacterized GPI-anchored protein At1g61900 OS=Arabidopsis thaliana OX=3702 GN=At1g61900 PE=2 SV=1	S	Function unknown	uncharacterized GPI-anchored protein At1g61900 isoform X1 [Glycine max]	cellular component: cell (GO:0005623);; cellular component: membrane (GO:0016020);; cellular component: cell part (GO:0044464)
gene-LOC100777561	7.58825	15.0946	7.92397	0	0	0	1.62339e-13	-8.37434	down	--	--	Cellular Component: ubiquitin ligase complex (GO:0000151);; Molecular Function: molecular_function (GO:0003674);; Molecular Function: binding (GO:0005488);; Molecular Function: protein binding (GO:0005515);; Cellular Component: cellular_component (GO:0005575);; Cellular Component: intracellular (GO:0005622);; Cellular Component: cell (GO:0005623);; Cellular Component: cytoplasm (GO:0005737);; Bio…	K10523|2.1e-154|gmx:100777561|K10523 speckle-type POZ protein | (RefSeq) BTB/POZ domain-containing protein At3g56230	--	[DR]	Cell cycle control, cell division, chromosome partitioning;; General function prediction only	BTB/POZ domain	BTB/POZ domain-containing protein At3g56230 OS=Arabidopsis thaliana OX=3702 GN=At3g56230 PE=2 SV=1	D	Cell cycle control, cell division, chromosome partitioning	BTB/POZ domain-containing protein At3g56230 [Glycine max]	cellular component: cell (GO:0005623);; cellular component: macromolecular complex (GO:0032991);; cellular component: cell part (GO:0044464);; molecular function: binding (GO:0005488);; biological process: metabolic process (GO:0008152);; biological process: cellular process (GO:0009987);; biological process: biological regulation (GO:0065007)
gene-LOC100811067	33.2944	14.7655	32.617	4.58734	2.21205	5.26907	0.00143207	-1.29323	down	--	--	Molecular Function: ATP binding (GO:0005524);; Molecular Function: transferase activity (GO:0016740);;	K10583|3.2e-123|gmx:100811067|K10583 ubiquitin-conjugating enzyme E2 S [EC:2.3.2.23] | (RefSeq) uncharacterized protein LOC100811067	Ubiquitin mediated proteolysis (ko04120)	[O]	Posttranslational modification, protein turnover, chaperones	Ubiquitin-conjugating enzyme	Ubiquitin-conjugating enzyme E2 22 OS=Arabidopsis thaliana OX=3702 GN=UBC22 PE=1 SV=1	O	Posttranslational modification, protein turnover, chaperones	ubiquitin-conjugating enzyme E2 22-like [Glycine max]	molecular function: binding (GO:0005488);; molecular function: catalytic activity (GO:0003824)
gene-LOC100780588	2.44541	3.21915	2.69822	0	0.078647	0	6.17848e-09	-4.85772	down	[Q]	Secondary metabolites biosynthesis, transport and catabolism	Molecular Function: molecular_function (GO:0003674);; Molecular Function: catalytic activity (GO:0003824);; Biological Process: multicellular organism development (GO:0007275);; Biological Process: aging (GO:0007568);; Biological Process: biological_process (GO:0008150);; Biological Process: metabolic process (GO:0008152);; Biological Process: leaf senescence (GO:0010150);; Molecular Function: ox…	K14976|1.0e-29|psom:113347789|K14976 thebaine 6-O-demethylase [EC:1.14.11.31] | (RefSeq) thebaine 6-O-demethylase	Isoquinoline alkaloid biosynthesis (ko00950)	[QR]	Secondary metabolites biosynthesis, transport and catabolism;; General function prediction only	non-haem dioxygenase in morphine synthesis N-terminal	S-norcoclaurine synthase 1 OS=Coptis japonica OX=3442 GN=NCS1 PE=1 SV=1	Q	Secondary metabolites biosynthesis, transport and catabolism	unknown [Glycine max]	molecular function: catalytic activity (GO:0003824);; biological process: multicellular organismal process (GO:0032501);; biological process: developmental process (GO:0032502);; biological process: single-organism process (GO:0044699);; biological process: metabolic process (GO:0008152)
gene-LOC100811345	0.053979	0	0.071147	0.842832	0.490373	0.622147	1.5087e-14	5.11644	up	--	--	Cellular Component: nucleus (GO:0005634);; Molecular Function: protein dimerization activity (GO:0046983);;	K16189|0.0e+00|gmx:100811345|K16189 phytochrome-interacting factor 4 | (RefSeq) transcription factor PIF4	Plant hormone signal transduction (ko04075)	--	--	Helix-loop-helix DNA-binding domain	Transcription factor PIF4 OS=Arabidopsis thaliana OX=3702 GN=PIF4 PE=1 SV=1	K	Transcription	transcription factor PIF4 [Glycine max]	cellular component: cell (GO:0005623);; cellular component: organelle (GO:0043226);; cellular component: cell part (GO:0044464);; molecular function: binding (GO:0005488)
gene-LOC100795858	1.95798	12.8491	1.82487	0	0	0	3.63054e-09	-7.35763	down	[R]	General function prediction only	Molecular Function: O-methyltransferase activity (GO:0008171);; Molecular Function: S-adenosylmethionine-dependent methyltransferase activity (GO:0008757);;	K00588|1.5e-141|gmx:100795858|K00588 caffeoyl-CoA O-methyltransferase [EC:2.1.1.104] | (RefSeq) caffeoyl-CoA O-methyltransferase 5 isoform X1	Phenylpropanoid biosynthesis (ko00940);; Flavonoid biosynthesis (ko00941);; Stilbenoid, diarylheptanoid and gingerol biosynthesis (ko00945)	[Q]	Secondary metabolites biosynthesis, transport and catabolism	O-methyltransferase	Caffeoyl-CoA O-methyltransferase 2 OS=Eucalyptus globulus OX=34317 GN=CCOAOMT2 PE=2 SV=1	Q	Secondary metabolites biosynthesis, transport and catabolism	caffeoyl-CoA O-methyltransferase 5 isoform X1 [Glycine max]	molecular function: catalytic activity (GO:0003824);; biological process: metabolic process (GO:0008152)
gene-LOC100807676	9.03035	9.58106	9.34243	0.076386	0.151458	0.155966	2.0359e-36	-4.59326	down	--	--	Biological Process: reproduction (GO:0000003);; Biological Process: cell morphogenesis (GO:0000902);; Biological Process: cell morphogenesis involved in differentiation (GO:0000904);; Biological Process: developmental process involved in reproduction (GO:0003006);; Molecular Function: protein binding (GO:0005515);; Biological Process: biological_process (GO:0008150);; Biological Process: anatomic…	--	--	--	--	NPH3 family	BTB/POZ domain-containing protein At1g03010 OS=Arabidopsis thaliana OX=3702 GN=At1g03010 PE=2 SV=1	S	Function unknown	BTB/POZ domain-containing protein At1g03010 isoform X1 [Glycine max]	biological process: reproduction (GO:0000003);; biological process: cellular process (GO:0009987);; biological process: developmental process (GO:0032502);; biological process: single-organism process (GO:0044699);; biological process: cellular component organization or biogenesis (GO:0071840);; biological process: reproductive process (GO:0022414);; molecular function: binding (GO:0005488);; bio…
gene-LOC100793425	1.09771	0.628582	1.01907	0.961605	0.761169	0.824004	0.000365507	1.33048	up	--	--	Molecular Function: molecular_function (GO:0003674);; Molecular Function: nucleic acid binding (GO:0003676);; Molecular Function: RNA binding (GO:0003723);; Molecular Function: catalytic activity (GO:0003824);; Molecular Function: nuclease activity (GO:0004518);; Molecular Function: endonuclease activity (GO:0004519);; Molecular Function: binding (GO:0005488);; Cellular Component: cellular_compon…	--	--	[R]	General function prediction only	PPR repeat family	Pentatricopeptide repeat-containing protein At3g16010 OS=Arabidopsis thaliana OX=3702 GN=At3g16010 PE=2 SV=1	S	Function unknown	pentatricopeptide repeat-containing protein At3g16010 [Glycine max]	molecular function: binding (GO:0005488);; molecular function: catalytic activity (GO:0003824);; biological process: metabolic process (GO:0008152);; biological process: cellular process (GO:0009987);; cellular component: cell (GO:0005623);; cellular component: cell part (GO:0044464);; cellular component: organelle (GO:0043226)
gene-LOC100808390	2.24121	1.43396	2.04154	2.6489	2.85867	1.59042	3.31461e-06	1.803	up	--	--	--	--	--	--	--	--	COP1-interacting protein 7 OS=Arabidopsis thaliana OX=3702 GN=CIP7 PE=1 SV=1	--	--	COP1-interacting protein 7 isoform X1 [Glycine max]	--
gene-LOC100813479	14.348	12.8539	13.4986	0.946565	1.13563	1.17641	5.87914e-27	-2.21264	down	--	--	Molecular Function: microtubule motor activity (GO:0003777);; Molecular Function: ATP binding (GO:0005524);; Cellular Component: kinesin complex (GO:0005871);; Cellular Component: microtubule (GO:0005874);; Biological Process: microtubule-based movement (GO:0007018);; Molecular Function: microtubule binding (GO:0008017);; Molecular Function: ATPase activity (GO:0016887);;	K11498|0.0e+00|gmx:100813479|K11498 centromeric protein E | (RefSeq) kinesin-like protein KIN-7E isoform X1	--	[Z]	Cytoskeleton	Kinesin motor domain	Kinesin-like protein KIN-7E OS=Arabidopsis thaliana OX=3702 GN=KIN7E PE=2 SV=1	Z	Cytoskeleton	kinesin-like protein KIN-7E isoform X1 [Glycine max]	molecular function: catalytic activity (GO:0003824);; molecular function: binding (GO:0005488);; cellular component: cell (GO:0005623);; cellular component: macromolecular complex (GO:0032991);; cellular component: organelle (GO:0043226);; cellular component: organelle part (GO:0044422);; cellular component: cell part (GO:0044464);; cellular component: supramolecular complex (GO:0099080);; biolog…
gene-LOC100811489	0.837785	0.45384	1.37255	0.026398	0.041421	0	5.02443e-05	-3.38924	down	[T]	Signal transduction mechanisms	Molecular Function: protein serine/threonine kinase activity (GO:0004674);; Molecular Function: ATP binding (GO:0005524);; Cellular Component: integral component of membrane (GO:0016021);;	K00924|8.9e-86|csat:104741456|K00924 kinase [EC:2.7.1.-] | (RefSeq) receptor-like protein kinase HSL1	--	--	--	Protein kinase domain	Receptor-like protein kinase 7 OS=Arabidopsis thaliana OX=3702 GN=RLK7 PE=1 SV=1	T	Signal transduction mechanisms	receptor-like protein kinase 7 [Glycine max]	molecular function: catalytic activity (GO:0003824);; biological process: metabolic process (GO:0008152);; biological process: cellular process (GO:0009987);; molecular function: binding (GO:0005488);; cellular component: membrane (GO:0016020);; cellular component: membrane part (GO:0044425)
gene-LOC100785535	2.41502	2.01827	2.07788	0	0.156285	0	0.00141544	-3.3134	down	--	--	--	--	--	--	--	--	--	--	--	uncharacterized protein LOC100785535 [Glycine max]	--
gene-LOC100818401	1.27033	1.27497	1.3798	0	0.024568	0.042705	8.3269e-08	-3.9139	down	--	--	--	--	--	--	--	Protein BYPASS1-related	--	--	--	uncharacterized protein LOC100818401 [Glycine max]	--
gene-LOC100779441	2.17962	5.19916	2.07673	3.41043	3.34669	4.91095	0.000284774	1.69327	up	--	--	Biological Process: ubiquitin-dependent ERAD pathway (GO:0030433);; Molecular Function: polyubiquitin modification-dependent protein binding (GO:0031593);; Cellular Component: VCP-NPL4-UFD1 AAA ATPase complex (GO:0034098);; Biological Process: ER-associated misfolded protein catabolic process (GO:0071712);;	K14016|3.6e-26|olu:OSTLU_34773|K14016 ubiquitin fusion degradation protein 1 | (RefSeq) predicted protein	Protein processing in endoplasmic reticulum (ko04141)	[O]	Posttranslational modification, protein turnover, chaperones	Ubiquitin fusion degradation protein UFD1	--	--	--	uncharacterized protein LOC100779441 [Glycine max]	biological process: metabolic process (GO:0008152);; biological process: cellular process (GO:0009987);; biological process: single-organism process (GO:0044699);; biological process: response to stimulus (GO:0050896);; molecular function: binding (GO:0005488);; cellular component: cell (GO:0005623);; cellular component: membrane (GO:0016020);; cellular component: macromolecular complex (GO:00329…
gene-NAC6	14.4043	19.7555	13.6737	0.128239	0.215513	0.42869	1.85819e-21	-4.34621	down	--	--	Molecular Function: DNA binding (GO:0003677);; Cellular Component: nucleus (GO:0005634);; Biological Process: regulation of transcription, DNA-templated (GO:0006355);;	K00521|5.1e-48|cmos:111447866|K00521 ferric-chelate reductase [EC:1.16.1.7] | (RefSeq) ferric reduction oxidase 7, chloroplastic-like	--	--	--	No apical meristem (NAM) protein	NAC domain-containing protein 6 OS=Glycine max OX=3847 GN=NAC6 PE=2 SV=1	K	Transcription	NAC domain protein NAC6 [Glycine max]	molecular function: binding (GO:0005488);; cellular component: cell (GO:0005623);; cellular component: organelle (GO:0043226);; cellular component: cell part (GO:0044464);; biological process: biological regulation (GO:0065007)
gene-LOC100813797	6.54824	7.3762	7.13747	1.03468	1.03293	1.09085	9.3064e-07	-1.26841	down	--	--	Molecular Function: protein binding (GO:0005515);;	--	--	--	--	Kelch motif	F-box/kelch-repeat protein At5g42350 OS=Arabidopsis thaliana OX=3702 GN=At5g42350 PE=2 SV=1	S	Function unknown	F-box/kelch-repeat protein At5g42350 [Glycine max]	molecular function: binding (GO:0005488)
Glycine_max_newGene_9503	1.00386	3.24053	0.758239	0	0	0	5.95919e-07	-6.45029	down	[Q]	Secondary metabolites biosynthesis, transport and catabolism	Molecular Function: transferase activity, transferring acyl groups other than amino-acyl groups (GO:0016747);;	K19861|1.8e-152|ccaj:109815603|K19861 benzyl alcohol O-benzoyltransferase [EC:2.3.1.196 2.3.1.232] | (RefSeq) benzyl alcohol O-benzoyltransferase	--	--	--	Transferase family	Benzyl alcohol O-benzoyltransferase OS=Nicotiana tabacum OX=4097 GN=HSR201 PE=1 SV=1	S	Function unknown	Benzyl alcohol O-benzoyltransferase [Glycine soja]	molecular function: catalytic activity (GO:0003824)
gene-LOC100793028	32.2003	44.1807	32.6406	5.66039	4.20226	6.07604	2.7411e-07	-1.33302	down	--	--	Molecular Function: chorismate mutase activity (GO:0004106);; Biological Process: aromatic amino acid family biosynthetic process (GO:0009073);; Biological Process: chorismate metabolic process (GO:0046417);;	K01850|3.5e-180|gmx:100793028|K01850 chorismate mutase [EC:5.4.99.5] | (RefSeq) chorismate mutase 1, chloroplastic	Phenylalanine, tyrosine and tryptophan biosynthesis (ko00400);; Biosynthesis of amino acids (ko01230)	[E]	Amino acid transport and metabolism	--	Chorismate mutase 1, chloroplastic OS=Arabidopsis thaliana OX=3702 GN=CM1 PE=1 SV=3	E	Amino acid transport and metabolism	chorismate mutase 1, chloroplastic [Glycine max]	molecular function: catalytic activity (GO:0003824);; biological process: metabolic process (GO:0008152);; biological process: cellular process (GO:0009987);; biological process: single-organism process (GO:0044699)
gene-LOC100814789	15.9836	9.84238	15.5413	1.66647	0.861534	3.31548	0.00335226	-1.36882	down	--	--	Molecular Function: molecular_function (GO:0003674);; Molecular Function: transcription factor activity, sequence-specific DNA binding (GO:0003700);; Biological Process: regulation of transcription, DNA-templated (GO:0006355);; Biological Process: cell communication (GO:0007154);; Biological Process: signal transduction (GO:0007165);; Biological Process: biological_process (GO:0008150);; Biologic…	--	--	--	--	--	Transcription factor IBH1-like 1 OS=Arabidopsis thaliana OX=3702 GN=IBL1 PE=1 SV=1	S	Function unknown	transcription factor IBH1-like 1 [Glycine max]	molecular function: nucleic acid binding transcription factor activity (GO:0001071);; biological process: biological regulation (GO:0065007);; biological process: cellular process (GO:0009987);; biological process: response to stimulus (GO:0050896);; biological process: signaling (GO:0023052);; biological process: single-organism process (GO:0044699)
gene-LOC100784306	11.2399	8.23652	10.8492	8.54182	10.2064	4.73051	0.00594865	1.12976	up	[L]	Replication, recombination and repair	Molecular Function: nucleic acid binding (GO:0003676);; Molecular Function: helicase activity (GO:0004386);; Molecular Function: ATP binding (GO:0005524);;	K12811|0.0e+00|gmx:100784306|K12811 ATP-dependent RNA helicase DDX46/PRP5 [EC:3.6.4.13] | (RefSeq) DEAD-box ATP-dependent RNA helicase 42	Spliceosome (ko03040)	[A]	RNA processing and modification	DEAD/DEAH box helicase	DEAD-box ATP-dependent RNA helicase 42 OS=Arabidopsis thaliana OX=3702 GN=RH42 PE=1 SV=2	A	RNA processing and modification	DEAD-box ATP-dependent RNA helicase 42 [Glycine max]	molecular function: binding (GO:0005488);; molecular function: catalytic activity (GO:0003824)
gene-LOC100799549	10.1015	15.6645	9.39845	0.37996	0.199671	0.530118	2.79446e-16	-3.46652	down	--	--	--	K14399|6.8e-20|csl:COCSUDRAFT_47181|K14399 polyribonucleotide 5'-hydroxyl-kinase [EC:2.7.1.78] | (RefSeq) Clp1-domain-containing protein	mRNA surveillance pathway (ko03015)	[I]	Lipid transport and metabolism	CRAL/TRIO domain	--	I	Lipid transport and metabolism	phosphatidylinositol transfer protein 3 [Glycine max]	--
gene-LOC100793208	0.981169	1.20027	1.68075	2.76633	1.91192	2.71158	6.40713e-15	2.35156	up	[E]	Amino acid transport and metabolism	Molecular Function: glycine hydroxymethyltransferase activity (GO:0004372);; Biological Process: glycine metabolic process (GO:0006544);; Biological Process: L-serine catabolic process (GO:0006565);; Biological Process: one-carbon metabolic process (GO:0006730);; Molecular Function: zinc ion binding (GO:0008270);; Molecular Function: amino acid binding (GO:0016597);; Biological Process: glycine b…	K00600|0.0e+00|gmx:100793208|K00600 glycine hydroxymethyltransferase [EC:2.1.2.1] | (RefSeq) serine hydroxymethyltransferase 7	Glycine, serine and threonine metabolism (ko00260);; Cyanoamino acid metabolism (ko00460);; Glyoxylate and dicarboxylate metabolism (ko00630);; One carbon pool by folate (ko00670);; Carbon metabolism (ko01200);; Biosynthesis of amino acids (ko01230)	[E]	Amino acid transport and metabolism	Serine hydroxymethyltransferase	Serine hydroxymethyltransferase 7 OS=Arabidopsis thaliana OX=3702 GN=SHM7 PE=2 SV=1	E	Amino acid transport and metabolism	hypothetical protein GLYMA_04G254300 [Glycine max]	molecular function: catalytic activity (GO:0003824);; biological process: metabolic process (GO:0008152);; biological process: cellular process (GO:0009987);; biological process: single-organism process (GO:0044699);; molecular function: binding (GO:0005488);; biological process: response to stimulus (GO:0050896)
gene-LOC100779744	5.63138	9.12217	6.47257	0.360927	0.15003	0.268005	1.56599e-18	-3.30363	down	--	--	Molecular Function: protein kinase activity (GO:0004672);; Molecular Function: ATP binding (GO:0005524);; Cellular Component: integral component of membrane (GO:0016021);;	K13430|2.0e-33|csat:104783579|K13430 serine/threonine-protein kinase PBS1 [EC:2.7.11.1] | (RefSeq) serine/threonine-protein kinase CDG1	Plant-pathogen interaction (ko04626)	--	--	Protein tyrosine and serine/threonine kinase	Probable LRR receptor-like serine/threonine-protein kinase At1g63430 OS=Arabidopsis thaliana OX=3702 GN=At1g63430 PE=1 SV=1	T	Signal transduction mechanisms	probable LRR receptor-like serine/threonine-protein kinase At1g63430 [Glycine max]	molecular function: catalytic activity (GO:0003824);; biological process: metabolic process (GO:0008152);; biological process: cellular process (GO:0009987);; molecular function: binding (GO:0005488);; cellular component: membrane (GO:0016020);; cellular component: membrane part (GO:0044425)
gene-LOC100784217	1.72169	2.29176	1.98456	0	0	0	1.15568e-06	-6.22649	down	--	--	--	--	--	--	--	PAR1 protein	--	S	Function unknown	uncharacterized protein LOC100784217 [Glycine max]	--
gene-GMIQD42	6.30232	9.14003	6.58173	0.613736	0.159118	1.23563	0.000591163	-1.9933	down	--	--	Molecular Function: molecular_function (GO:0003674);; Molecular Function: binding (GO:0005488);; Molecular Function: protein binding (GO:0005515);; Cellular Component: cellular_component (GO:0005575);; Cellular Component: intracellular (GO:0005622);; Cellular Component: cell (GO:0005623);; Cellular Component: nucleus (GO:0005634);; Cellular Component: cytoskeleton (GO:0005856);; Cellular Componen…	--	--	--	--	--	Protein IQ-DOMAIN 1 OS=Arabidopsis thaliana OX=3702 GN=IQD1 PE=1 SV=1	S	Function unknown	LOW QUALITY PROTEIN: protein IQ-DOMAIN 1 [Glycine max]	molecular function: binding (GO:0005488);; cellular component: cell (GO:0005623);; cellular component: cell part (GO:0044464);; cellular component: organelle (GO:0043226);; cellular component: organelle part (GO:0044422);; cellular component: supramolecular complex (GO:0099080)
gene-LOC100776207	3.99677	3.96215	3.69238	0.066221	0.073485	0.150678	2.99228e-17	-3.71901	down	--	--	Cellular Component: host cell nucleus (GO:0042025);;	K06627|1.3e-204|gmx:100776207|K06627 cyclin-A | (RefSeq) uncharacterized protein LOC100776207	--	[D]	Cell cycle control, cell division, chromosome partitioning	Cyclin, N-terminal domain	Cyclin-A1-1 OS=Arabidopsis thaliana OX=3702 GN=CYCA1-1 PE=1 SV=1	D	Cell cycle control, cell division, chromosome partitioning	uncharacterized protein LOC100776207 isoform X1 [Glycine max]	cellular component: other organism (GO:0044215);; cellular component: other organism part (GO:0044217)
gene-LOC100815486	3.40878	4.54385	3.80089	0.144055	0.164286	0.265268	5.94045e-09	-2.16757	down	[R]	General function prediction only	Biological Process: signal transduction (GO:0007165);; Molecular Function: ADP binding (GO:0043531);;	K00695|2.9e-139|mtr:MTR_6g478030|K00695 sucrose synthase [EC:2.4.1.13] | (RefSeq) sucrose synthase	Starch and sucrose metabolism (ko00500)	--	--	TIR domain	TMV resistance protein N OS=Nicotiana glutinosa OX=35889 GN=N PE=1 SV=1	S	Function unknown	TMV resistance protein N isoform X1 [Glycine max]	biological process: cellular process (GO:0009987);; biological process: biological regulation (GO:0065007);; molecular function: binding (GO:0005488)
gene-LOC100305990	6.42959	13.3867	5.3679	1.45282	0.531816	1.04599	0.00332393	-1.60131	down	--	--	Cellular Component: integral component of membrane (GO:0016021);; Molecular Function: oxidoreductase activity (GO:0016491);;	K08360|8.7e-119|gmx:100305990|K08360 cytochrome b-561 [EC:7.2.1.3] | (RefSeq) uncharacterized protein LOC100305990	--	[C]	Energy production and conversion	Eukaryotic cytochrome b561	Probable transmembrane ascorbate ferrireductase 3 OS=Arabidopsis thaliana OX=3702 GN=CYB561C PE=2 SV=1	C	Energy production and conversion	uncharacterized protein LOC100305990 [Glycine max]	cellular component: membrane (GO:0016020);; cellular component: membrane part (GO:0044425);; molecular function: catalytic activity (GO:0003824)
gene-LOC100814793	15.0724	11.8541	14.1782	12.3955	11.0409	10.9014	6.10043e-08	1.20812	up	--	--	Cellular Component: BRCA1-A complex (GO:0070531);; Cellular Component: BRISC complex (GO:0070552);;	K12173|7.5e-222|gmx:100814793|K12173 BRCA1-A complex subunit BRE | (RefSeq) uncharacterized protein LOC100814793	Homologous recombination (ko03440)	--	--	Brain and reproductive organ-expressed protein (BRE)	--	S	Function unknown	uncharacterized protein LOC100814793 [Glycine max]	cellular component: cell (GO:0005623);; cellular component: macromolecular complex (GO:0032991);; cellular component: organelle (GO:0043226);; cellular component: organelle part (GO:0044422);; cellular component: cell part (GO:0044464)
gene-MYB128	1.92824	7.06092	3.61396	0	0	0	4.45608e-09	-7.18895	down	--	--	Molecular Function: DNA binding (GO:0003677);; Cellular Component: nucleus (GO:0005634);; Molecular Function: zinc ion binding (GO:0008270);;	K08869|1.3e-24|cre:CHLREDRAFT_165812|K08869 aarF domain-containing kinase | (RefSeq) predicted protein	--	--	--	Myb-like DNA-binding domain	Transcription factor KUA1 OS=Arabidopsis thaliana OX=3702 GN=KUA1 PE=1 SV=1	K	Transcription	MYB transcription factor MYB128 [Glycine max]	molecular function: binding (GO:0005488);; cellular component: cell (GO:0005623);; cellular component: organelle (GO:0043226);; cellular component: cell part (GO:0044464)
gene-LOC100791891	5.98477	10.1791	6.35049	0.176004	0.216003	0.121162	2.5167e-21	-3.90012	down	[L]	Replication, recombination and repair	Biological Process: signal transduction (GO:0007165);; Cellular Component: integral component of membrane (GO:0016021);; Molecular Function: ADP binding (GO:0043531);;	K00695|1.1e-98|mtr:MTR_6g478030|K00695 sucrose synthase [EC:2.4.1.13] | (RefSeq) sucrose synthase	Starch and sucrose metabolism (ko00500)	--	--	TIR domain	Disease resistance protein RPV1 OS=Vitis rotundifolia OX=103349 GN=RPV1 PE=1 SV=1	S	Function unknown	disease resistance-like protein DSC1 isoform X1 [Glycine max]	biological process: cellular process (GO:0009987);; biological process: biological regulation (GO:0065007);; cellular component: membrane (GO:0016020);; cellular component: membrane part (GO:0044425);; molecular function: binding (GO:0005488)
gene-LOC100500214	25.1711	31.2858	24.4824	0.255863	0	0.236547	9.02556e-31	-5.64916	down	[V]	Defense mechanisms	Biological Process: nucleoside triphosphate catabolic process (GO:0009143);; Molecular Function: dCTP diphosphatase activity (GO:0047840);;	K16904|4.1e-67|gmx:100500214|K16904 dCTP diphosphatase [EC:3.6.1.12] | (RefSeq) uncharacterized protein LOC100500214	Pyrimidine metabolism (ko00240)	--	--	MazG nucleotide pyrophosphohydrolase domain	--	S	Function unknown	uncharacterized protein LOC100500214 [Glycine max]	biological process: metabolic process (GO:0008152);; biological process: cellular process (GO:0009987);; biological process: single-organism process (GO:0044699);; molecular function: catalytic activity (GO:0003824)
gene-LOC100819459	10.7539	7.13068	12.4744	22.8477	9.01942	10.8669	4.31101e-09	1.93219	up	[H]	Coenzyme transport and metabolism	Molecular Function: hydrolase activity (GO:0016787);;	K07025|1.5e-175|gmx:100819459|K07025 putative hydrolase of the HAD superfamily | (RefSeq) uncharacterized protein LOC100819459 isoform X2	--	[R]	General function prediction only	Haloacid dehalogenase-like hydrolase	--	S	Function unknown	uncharacterized protein LOC100819459 isoform X1 [Glycine max]	molecular function: catalytic activity (GO:0003824)
gene-LOC100780442	3.39029	1.37624	3.21844	0.12787	0.088909	0	2.04419e-05	-3.38058	down	--	--	Molecular Function: transcription regulatory region sequence-specific DNA binding (GO:0000976);; Cellular Component: nucleus (GO:0005634);; Biological Process: regulation of transcription, DNA-templated (GO:0006355);;	--	--	--	--	No apical meristem (NAM) protein	SUPPRESSOR OF GAMMA RESPONSE 1 OS=Arabidopsis thaliana OX=3702 GN=SOG1 PE=1 SV=1	K	Transcription	SUPPRESSOR OF GAMMA RESPONSE 1 [Glycine max]	molecular function: binding (GO:0005488);; cellular component: cell (GO:0005623);; cellular component: organelle (GO:0043226);; cellular component: cell part (GO:0044464);; biological process: biological regulation (GO:0065007)
gene-LOC100800835	1.72809	1.53775	1.57723	0	0	0	1.85227e-07	-6.5259	down	[IR]	Lipid transport and metabolism;; General function prediction only	Molecular Function: hydrolase activity, acting on ester bonds (GO:0016788);;	K00679|3.0e-50|cic:CICLE_v10027727mg|K00679 phospholipid:diacylglycerol acyltransferase [EC:2.3.1.158] | (RefSeq) hypothetical protein	Glycerolipid metabolism (ko00561)	--	--	GDSL-like Lipase/Acylhydrolase	GDSL esterase/lipase At4g28780 OS=Arabidopsis thaliana OX=3702 GN=At4g28780 PE=2 SV=1	I	Lipid transport and metabolism	GDSL esterase/lipase At4g28780 [Glycine max]	molecular function: catalytic activity (GO:0003824)
gene-LOC100815818	17.0058	10.6988	16.5018	15.1646	9.2462	11.8888	4.85993e-06	1.15625	up	[P]	Inorganic ion transport and metabolism	Cellular Component: integral component of plasma membrane (GO:0005887);; Molecular Function: secondary active sulfate transmembrane transporter activity (GO:0008271);; Molecular Function: anion:anion antiporter activity (GO:0015301);;	K17470|2.8e-72|gmx:100784124|K17470 sulfate transporter 1, high-affinity | (RefSeq) high affinity sulfate transporter 2	--	[P]	Inorganic ion transport and metabolism	Sulfate permease family	High affinity sulfate transporter 2 OS=Stylosanthes hamata OX=37660 GN=ST2 PE=2 SV=1	P	Inorganic ion transport and metabolism	high affinity sulfate transporter 2 isoform X1 [Glycine max]	cellular component: cell (GO:0005623);; cellular component: membrane (GO:0016020);; cellular component: membrane part (GO:0044425);; cellular component: cell part (GO:0044464);; molecular function: transporter activity (GO:0005215);; biological process: single-organism process (GO:0044699);; biological process: localization (GO:0051179)
gene-LOC100798700	23.6307	26.3676	24.5184	2.44705	3.67593	2.2241	6.03572e-06	-1.62566	down	--	--	Cellular Component: integral component of membrane (GO:0016021);;	--	--	--	--	--	Proton pump-interactor 1 OS=Arabidopsis thaliana OX=3702 GN=PPI1 PE=1 SV=2	S	Function unknown	plectin [Glycine max]	cellular component: membrane (GO:0016020);; cellular component: membrane part (GO:0044425)
gene-LOC100782096	2.94721	4.51286	3.42609	5.89503	4.29073	1.70246	0.00203656	1.54791	up	[C]	Energy production and conversion	Molecular Function: malic enzyme activity (GO:0004470);; Molecular Function: malate dehydrogenase (decarboxylating) (NAD+) activity (GO:0004471);; Molecular Function: malate dehydrogenase (decarboxylating) (NADP+) activity (GO:0004473);; Biological Process: pyruvate metabolic process (GO:0006090);; Biological Process: malate metabolic process (GO:0006108);; Cellular Component: chloroplast (GO:000…	K00029|0.0e+00|gmx:100782096|K00029 malate dehydrogenase (oxaloacetate-decarboxylating)(NADP+) [EC:1.1.1.40] | (RefSeq) NADP-dependent malic enzyme isoform X1	Pyruvate metabolism (ko00620);; Carbon fixation in photosynthetic organisms (ko00710);; Carbon metabolism (ko01200)	[C]	Energy production and conversion	Malic enzyme, NAD binding domain	NADP-dependent malic enzyme OS=Vitis vinifera OX=29760 PE=2 SV=1	C	Energy production and conversion	NADP-dependent malic enzyme isoform X1 [Glycine max]	molecular function: catalytic activity (GO:0003824);; biological process: metabolic process (GO:0008152);; biological process: single-organism process (GO:0044699);; biological process: cellular process (GO:0009987);; cellular component: cell (GO:0005623);; cellular component: organelle (GO:0043226);; cellular component: cell part (GO:0044464);; molecular function: binding (GO:0005488)
gene-LOC100796711	6.33352	6.91109	6.53148	8.33617	4.37279	7.87609	2.30588e-09	1.45885	up	--	--	--	--	--	--	--	PDDEXK-like family of unknown function	--	S	Function unknown	uncharacterized protein LOC100796711 [Glycine max]	--
gene-LOC100783572	4.97474	9.21096	6.51585	0.072893	0.036321	0.061995	3.00767e-17	-5.02536	down	--	--	Molecular Function: calcium ion binding (GO:0005509);;	K13448|1.4e-53|gmx:100783572|K13448 calcium-binding protein CML | (RefSeq) calcium-binding allergen Ole e 8	Plant-pathogen interaction (ko04626)	[T]	Signal transduction mechanisms	EF hand	Probable calcium-binding protein CML26 OS=Arabidopsis thaliana OX=3702 GN=CML26 PE=1 SV=1	T	Signal transduction mechanisms	calcium-binding allergen Ole e 8 [Glycine max]	molecular function: binding (GO:0005488)
gene-LOC106794654	1.03025	0.874841	1.40632	0	0	0.046889	2.5842e-05	-3.97547	down	[M]	Cell wall/membrane/envelope biogenesis	Cellular Component: integral component of membrane (GO:0016021);;	--	--	--	--	Glycosyltransferase Family 4	--	M	Cell wall/membrane/envelope biogenesis	uncharacterized protein LOC106794654 [Glycine max]	cellular component: membrane (GO:0016020);; cellular component: membrane part (GO:0044425)
gene-LOC100809977	3.69458	6.04666	5.554	6.37543	3.95647	3.69109	7.82122e-05	1.33815	up	[M]	Cell wall/membrane/envelope biogenesis	Molecular Function: protein kinase activity (GO:0004672);; Molecular Function: ATP binding (GO:0005524);;	K13412|7.6e-64|dosa:Os03t0788500-01|K13412 calcium-dependent protein kinase [EC:2.7.11.1] | (RefSeq) Os03g0788500, CDPK10, CALCIUM-DEPENDENT_PROTEIN_KINASE_10; Similar to Calcium-dependent protein kinase 2.	Plant-pathogen interaction (ko04626)	[T]	Signal transduction mechanisms	Protein kinase domain	Serine/threonine-protein kinase PEPKR2 OS=Arabidopsis thaliana OX=3702 GN=PEPKR2 PE=2 SV=1	T	Signal transduction mechanisms	serine/threonine-protein kinase PEPKR2 [Glycine max]	molecular function: catalytic activity (GO:0003824);; biological process: metabolic process (GO:0008152);; biological process: cellular process (GO:0009987);; molecular function: binding (GO:0005488)
gene-LOC100801963	4.16063	5.72188	3.83906	0.829087	0.625367	0.946465	0.00340167	-1.06439	down	--	--	Cellular Component: integral component of membrane (GO:0016021);;	K15102|1.0e-205|gmx:100801963|K15102 solute carrier family 25 (mitochondrial phosphate transporter), member 3 | (RefSeq) LOW QUALITY PROTEIN: mitochondrial phosphate carrier protein 3, mitochondrial	--	[C]	Energy production and conversion	Mitochondrial carrier protein	Mitochondrial phosphate carrier protein 3, mitochondrial OS=Arabidopsis thaliana OX=3702 GN=MPT3 PE=1 SV=1	C	Energy production and conversion	LOW QUALITY PROTEIN: mitochondrial phosphate carrier protein 3, mitochondrial [Glycine max]	cellular component: membrane (GO:0016020);; cellular component: membrane part (GO:0044425)
gene-LOC100779531	5.05865	4.00957	4.47088	0.08268	0.160753	0.302887	2.01965e-10	-3.0692	down	--	--	Cellular Component: Golgi apparatus (GO:0005794);; Molecular Function: antiporter activity (GO:0015297);; Cellular Component: integral component of membrane (GO:0016021);; Molecular Function: transmembrane transporter activity (GO:0022857);;	K15283|2.4e-237|gmx:100779531|K15283 solute carrier family 35, member E1 | (RefSeq) xylulose 5-phosphate/phosphate translocator, chloroplastic	--	[GE]	Carbohydrate transport and metabolism;; Amino acid transport and metabolism	Triose-phosphate Transporter family	Xylulose 5-phosphate/phosphate translocator, chloroplastic OS=Arabidopsis thaliana OX=3702 GN=XPT PE=1 SV=1	--	--	xylulose 5-phosphate/phosphate translocator, chloroplastic [Glycine max]	cellular component: cell (GO:0005623);; cellular component: organelle (GO:0043226);; cellular component: cell part (GO:0044464);; molecular function: transporter activity (GO:0005215);; biological process: localization (GO:0051179);; cellular component: membrane (GO:0016020);; cellular component: membrane part (GO:0044425)
gene-LOC100785644	21.1978	15.1374	19.8856	3.35566	2.63569	2.83464	5.9369e-07	-1.16293	down	--	--	--	K17046|1.2e-225|gmx:100785644|K17046 protein DEK | (RefSeq) protein DEK-like isoform X1	--	[B]	Chromatin structure and dynamics	DEK C terminal domain	--	B	Chromatin structure and dynamics	protein DEK-like isoform X1 [Glycine max]	--
gene-LOC100306663	27.2847	24.8122	31.1328	49.0217	13.0179	50.9557	2.4451e-05	1.78575	up	--	--	--	--	--	--	--	Zinc-binding	Uncharacterized protein At2g23090 OS=Arabidopsis thaliana OX=3702 GN=At2g23090 PE=1 SV=1	S	Function unknown	uncharacterized protein At2g23090 [Glycine max]	--
gene-LOC100786017	11.6505	8.96762	11.1881	0	0	0.018871	4.64685e-21	-7.644	down	[Q]	Secondary metabolites biosynthesis, transport and catabolism	Molecular Function: metal ion binding (GO:0046872);; Molecular Function: dioxygenase activity (GO:0051213);;	K05658|1.7e-119|cpep:111781709|K05658 ATP-binding cassette, subfamily B (MDR/TAP), member 1 [EC:7.6.2.2] | (RefSeq) uncharacterized protein LOC111781709	ABC transporters (ko02010)	[QR]	Secondary metabolites biosynthesis, transport and catabolism;; General function prediction only	non-haem dioxygenase in morphine synthesis N-terminal	Protein SRG1 OS=Arabidopsis thaliana OX=3702 GN=SRG1 PE=2 SV=1	Q	Secondary metabolites biosynthesis, transport and catabolism	protein SRG1 [Glycine max]	molecular function: binding (GO:0005488);; molecular function: catalytic activity (GO:0003824);; biological process: metabolic process (GO:0008152);; biological process: single-organism process (GO:0044699)
gene-LOC547659	3.03733	19.3235	2.8898	0	0	0	2.31516e-11	-8.04148	down	[R]	General function prediction only	--	K23050|3.5e-180|gmx:547659|K23050 phenylcoumaran benzylic ether reductase [EC:1.3.1.-] | (RefSeq) NADPH:isoflavone reductase	--	--	--	NmrA-like family	Isoflavone reductase OS=Glycine max OX=3847 GN=IFR PE=1 SV=1	S	Function unknown	NADPH:isoflavone reductase [Glycine max]	--
gene-LOC100811620	4.96749	11.2068	5.5603	0.583444	0.321242	0.225902	3.5623e-07	-2.72359	down	--	--	Cellular Component: membrane (GO:0016020);; Molecular Function: oxidoreductase activity, acting on NAD(P)H, quinone or similar compound as acceptor (GO:0016655);;	--	--	--	--	NADH-quinone oxidoreductase cyanobacterial subunit N	NAD(P)H-quinone oxidoreductase subunit N, chloroplastic OS=Arabidopsis thaliana OX=3702 GN=ndhN PE=2 SV=1	S	Function unknown	NAD(P)H-quinone oxidoreductase subunit N, chloroplastic [Glycine max]	cellular component: membrane (GO:0016020);; molecular function: catalytic activity (GO:0003824);; biological process: metabolic process (GO:0008152);; biological process: single-organism process (GO:0044699)
gene-LOC100807938	2.77297	2.07105	2.76211	2.87364	3.09312	2.70052	4.51835e-08	1.65453	up	--	--	Molecular Function: UDP-glycosyltransferase activity (GO:0008194);;	K22794|4.0e-281|gmx:100807938|K22794 flavonol-3-O-glucoside/galactoside glucosyltransferase [EC:2.4.1.239 2.4.1.-] | (RefSeq) UDP-glycosyltransferase 79B30-like	Flavone and flavonol biosynthesis (ko00944)	[GC]	Carbohydrate transport and metabolism;; Energy production and conversion	UDP-glucoronosyl and UDP-glucosyl transferase	Cyanidin 3-O-galactoside 2''-O-xylosyltransferase FGGT1 OS=Actinidia chinensis var. chinensis OX=1590841 GN=F3GGT1 PE=1 SV=2	--	--	UDP-glycosyltransferase 79B30-like [Glycine max]	molecular function: catalytic activity (GO:0003824)
gene-LOC100776324	0.290329	0.369183	0.459665	0.022104	0.006357	0.035443	0.00127902	-2.46871	down	[M]	Cell wall/membrane/envelope biogenesis	Molecular Function: protein kinase activity (GO:0004672);; Molecular Function: ATP binding (GO:0005524);; Cellular Component: plasma membrane (GO:0005886);; Cellular Component: plasmodesma (GO:0009506);; Cellular Component: integral component of membrane (GO:0016021);; Biological Process: protein autophosphorylation (GO:0046777);;	K13435|5.6e-81|spen:107018783|K13435 serine/threonine-protein kinase Pto | (RefSeq) receptor-like protein kinase HERK 1 isoform X2	Plant-pathogen interaction (ko04626)	[T]	Signal transduction mechanisms	Protein tyrosine and serine/threonine kinase	Receptor-like protein kinase FERONIA OS=Arabidopsis thaliana OX=3702 GN=FER PE=1 SV=1	T	Signal transduction mechanisms	receptor-like protein kinase FERONIA [Glycine max]	molecular function: catalytic activity (GO:0003824);; biological process: metabolic process (GO:0008152);; biological process: cellular process (GO:0009987);; molecular function: binding (GO:0005488);; cellular component: cell (GO:0005623);; cellular component: membrane (GO:0016020);; cellular component: cell part (GO:0044464);; cellular component: cell junction (GO:0030054);; cellular component:…
gene-LOC100794728	1.42925	1.03781	2.84839	37.8671	38.1804	38.4165	6.97701e-57	5.82168	up	--	--	Cellular Component: monolayer-surrounded lipid storage body (GO:0012511);; Cellular Component: integral component of membrane (GO:0016021);; Biological Process: lipid storage (GO:0019915);;	--	--	--	--	Oleosin	Oleosin OS=Lilium longiflorum OX=4690 PE=1 SV=1	S	Function unknown	oleosin 1 [Glycine max]	cellular component: cell (GO:0005623);; cellular component: organelle (GO:0043226);; cellular component: cell part (GO:0044464);; cellular component: membrane (GO:0016020);; cellular component: membrane part (GO:0044425);; biological process: localization (GO:0051179);; biological process: biological regulation (GO:0065007)
gene-LOC100799873	19.1297	32.4198	18.659	2.404	1.5427	1.62296	5.64191e-10	-2.19639	down	[G]	Carbohydrate transport and metabolism	Cellular Component: cytoplasm (GO:0005737);; Biological Process: sucrose biosynthetic process (GO:0005986);; Biological Process: fructose metabolic process (GO:0006000);; Biological Process: fructose 6-phosphate metabolic process (GO:0006002);; Biological Process: gluconeogenesis (GO:0006094);; Biological Process: fructose 1,6-bisphosphate metabolic process (GO:0030388);; Molecular Function: fruc…	K03841|2.9e-235|gmx:100799873|K03841 fructose-1,6-bisphosphatase I [EC:3.1.3.11] | (RefSeq) fructose-1,6-bisphosphatase, chloroplastic	Glycolysis / Gluconeogenesis (ko00010);; Pentose phosphate pathway (ko00030);; Fructose and mannose metabolism (ko00051);; Carbon fixation in photosynthetic organisms (ko00710);; Carbon metabolism (ko01200)	[G]	Carbohydrate transport and metabolism	Fructose-1-6-bisphosphatase, N-terminal domain	Fructose-1,6-bisphosphatase, chloroplastic OS=Glycine max OX=3847 GN=FBP PE=2 SV=1	G	Carbohydrate transport and metabolism	fructose-1,6-bisphosphatase, chloroplastic [Glycine max]	cellular component: cell (GO:0005623);; cellular component: cell part (GO:0044464);; biological process: metabolic process (GO:0008152);; biological process: cellular process (GO:0009987);; biological process: single-organism process (GO:0044699);; molecular function: catalytic activity (GO:0003824)
gene-LOC100796869	4.37233	4.31043	4.40057	0.728767	0.316271	0.593561	1.0958e-06	-1.54123	down	[R]	General function prediction only	Cellular Component: nucleus (GO:0005634);; Biological Process: dGTP catabolic process (GO:0006203);; Molecular Function: dGTPase activity (GO:0008832);;	K22544|1.0e-273|gmx:100796869|K22544 deoxynucleoside triphosphate triphosphohydrolase SAMHD1 [EC:3.1.5.-] | (RefSeq) deoxynucleoside triphosphate triphosphohydrolase SAMHD1 homolog isoform X1	--	[S]	Function unknown	HD domain	--	S	Function unknown	deoxynucleoside triphosphate triphosphohydrolase SAMHD1 homolog isoform X1 [Glycine max]	cellular component: cell (GO:0005623);; cellular component: organelle (GO:0043226);; cellular component: cell part (GO:0044464);; biological process: metabolic process (GO:0008152);; biological process: cellular process (GO:0009987);; biological process: single-organism process (GO:0044699);; molecular function: catalytic activity (GO:0003824)
gene-DEHYDRIN	0.89749	0.427364	1.33493	795.581	577.523	810.457	7.52442e-251	11.0016	up	--	--	--	--	--	--	--	--	--	--	--	dehydrin-like protein [Glycine max]	--
gene-LOC100776011	35.5451	37.0196	37.1346	1.70611	1.65047	3.79882	6.03266e-13	-2.47262	down	[DPM]	Cell cycle control, cell division, chromosome partitioning;; Inorganic ion transport and metabolism;; Cell wall/membrane/envelope biogenesis	Molecular Function: copper ion binding (GO:0005507);; Cellular Component: extracellular region (GO:0005576);; Cellular Component: plasmodesma (GO:0009506);; Molecular Function: oxidoreductase activity (GO:0016491);;	K00423|0.0e+00|gmx:100776011|K00423 L-ascorbate oxidase [EC:1.10.3.3] | (RefSeq) L-ascorbate oxidase	Ascorbate and aldarate metabolism (ko00053)	[Q]	Secondary metabolites biosynthesis, transport and catabolism	Multicopper oxidase	L-ascorbate oxidase OS=Nicotiana tabacum OX=4097 GN=AAO PE=2 SV=1	Q	Secondary metabolites biosynthesis, transport and catabolism	L-ascorbate oxidase [Glycine max]	molecular function: binding (GO:0005488);; cellular component: extracellular region (GO:0005576);; cellular component: cell junction (GO:0030054);; molecular function: catalytic activity (GO:0003824)
gene-LOC100779962	1.08479	0.802702	1.26835	2.15531	0.815093	1.53907	5.23086e-06	1.90017	up	[R]	General function prediction only	--	K01456|4.0e-105|pavi:110759676|K01456 peptide-N4-(N-acetyl-beta-glucosaminyl)asparagine amidase [EC:3.5.1.52] | (RefSeq) peptide-N(4)-(N-acetyl-beta- glucosaminyl)asparagine amidase-like	Protein processing in endoplasmic reticulum (ko04141)	[C]	Energy production and conversion	Aldo/keto reductase family	Probable aldo-keto reductase 2 OS=Oryza sativa subsp. japonica OX=39947 GN=Os04g0338000 PE=2 SV=2	C	Energy production and conversion	probable aldo-keto reductase 2 [Glycine max]	--
gene-LOC100805558	7.37159	9.69769	6.93208	10.5418	4.61038	8.64025	2.79275e-05	1.37193	up	[O]	Posttranslational modification, protein turnover, chaperones	Molecular Function: molecular_function (GO:0003674);; Molecular Function: binding (GO:0005488);; Molecular Function: protein binding (GO:0005515);; Cellular Component: cellular_component (GO:0005575);; Cellular Component: intracellular (GO:0005622);; Cellular Component: cell (GO:0005623);; Cellular Component: cytoplasm (GO:0005737);; Cellular Component: vacuole (GO:0005773);; Cellular Component: …	--	--	[C]	Energy production and conversion	SPFH domain / Band 7 family	Hypersensitive-induced response protein 2 OS=Arabidopsis thaliana OX=3702 GN=HIR2 PE=1 SV=1	C	Energy production and conversion	SPFH_like_u4 domain-containing protein HIR1-like [Glycine max]	molecular function: binding (GO:0005488);; cellular component: cell (GO:0005623);; cellular component: cell part (GO:0044464);; cellular component: organelle (GO:0043226);; cellular component: membrane (GO:0016020);; cellular component: organelle part (GO:0044422);; cellular component: cell junction (GO:0030054);; cellular component: symplast (GO:0055044)
gene-LOC100789565	12.0673	7.98827	11.5343	0.339506	0.488344	0.107282	6.77903e-11	-3.41636	down	--	--	Biological Process: regulation of cyclin-dependent protein serine/threonine kinase activity (GO:0000079);; Cellular Component: cyclin-dependent protein kinase holoenzyme complex (GO:0000307);; Cellular Component: nucleus (GO:0005634);; Cellular Component: cytoplasm (GO:0005737);; Cellular Component: integral component of membrane (GO:0016021);; Molecular Function: cyclin-dependent protein serine/…	K06627|1.8e-260|gmx:100789565|K06627 cyclin-A | (RefSeq) cyclin-A1-1	--	[D]	Cell cycle control, cell division, chromosome partitioning	Cyclin, N-terminal domain	Cyclin-A1-1 OS=Arabidopsis thaliana OX=3702 GN=CYCA1-1 PE=1 SV=1	D	Cell cycle control, cell division, chromosome partitioning	cyclin-A1-1 [Glycine max]	biological process: biological regulation (GO:0065007);; cellular component: cell (GO:0005623);; cellular component: macromolecular complex (GO:0032991);; cellular component: cell part (GO:0044464);; cellular component: organelle (GO:0043226);; cellular component: membrane (GO:0016020);; cellular component: membrane part (GO:0044425);; molecular function: molecular function regulator (GO:0098772)…
gene-LOC100800978	1.25722	0.905415	0.727739	2.65904	2.6498	2.2697	6.4268e-16	2.81752	up	[E]	Amino acid transport and metabolism	Molecular Function: proline dehydrogenase activity (GO:0004657);; Cellular Component: mitochondrion (GO:0005739);; Biological Process: proline catabolic process to glutamate (GO:0010133);; Molecular Function: FAD binding (GO:0071949);;	K00318|3.0e-279|gmx:100800978|K00318 proline dehydrogenase [EC:1.5.5.2] | (RefSeq) proline dehydrogenase 2, mitochondrial	Arginine and proline metabolism (ko00330)	[E]	Amino acid transport and metabolism	Proline dehydrogenase	Proline dehydrogenase 2, mitochondrial OS=Arabidopsis thaliana OX=3702 GN=POX2 PE=2 SV=1	E	Amino acid transport and metabolism	proline dehydrogenase 2, mitochondrial [Glycine max]	molecular function: catalytic activity (GO:0003824);; biological process: metabolic process (GO:0008152);; biological process: single-organism process (GO:0044699);; cellular component: cell (GO:0005623);; cellular component: organelle (GO:0043226);; cellular component: cell part (GO:0044464);; biological process: cellular process (GO:0009987);; molecular function: binding (GO:0005488)
gene-LOC100794757	0.958743	6.27978	0.993422	0.028342	0.033713	0	1.64411e-06	-4.88097	down	[I]	Lipid transport and metabolism	Molecular Function: S-adenosylmethionine-dependent methyltransferase activity (GO:0008757);; Biological Process: methylation (GO:0032259);;	K21483|3.9e-215|gmx:100794757|K21483 salicylate 1-O-methyltransferase [EC:2.1.1.274] | (RefSeq) salicylate carboxymethyltransferase	--	--	--	SAM dependent carboxyl methyltransferase	Salicylate carboxymethyltransferase OS=Clarkia breweri OX=36903 GN=SAMT PE=1 SV=1	S	Function unknown	salicylate carboxymethyltransferase [Glycine max]	molecular function: catalytic activity (GO:0003824);; biological process: metabolic process (GO:0008152)
gene-LOC100813253	9.37551	8.39386	11.1746	9.36104	9.30148	7.71639	4.17023e-07	1.33815	up	--	--	Biological Process: fucose metabolic process (GO:0006004);; Cellular Component: integral component of membrane (GO:0016021);; Molecular Function: transferase activity, transferring glycosyl groups (GO:0016757);;	K23280|1.2e-90|dosa:Os03t0328100-01|K23280 rhamnogalacturonan I rhamnosyltransferase [EC:2.4.1.351] | (RefSeq) Os03g0328100; Similar to Axi 1 (Auxin-independent growth promoter)-like protein.	--	--	--	GDP-fucose protein O-fucosyltransferase	O-fucosyltransferase 29 OS=Arabidopsis thaliana OX=3702 GN=OFUT29 PE=2 SV=1	G	Carbohydrate transport and metabolism	O-fucosyltransferase 29 [Glycine max]	biological process: metabolic process (GO:0008152);; biological process: single-organism process (GO:0044699);; cellular component: membrane (GO:0016020);; cellular component: membrane part (GO:0044425);; molecular function: catalytic activity (GO:0003824)
gene-LOC100811247	138.835	332.259	149.845	2.38692	1.41004	2.14521	4.13588e-38	-5.20116	down	[R]	General function prediction only	Molecular Function: O-methyltransferase activity (GO:0008171);; Molecular Function: S-adenosylmethionine-dependent methyltransferase activity (GO:0008757);;	K00588|1.8e-187|gmx:100811247|K00588 caffeoyl-CoA O-methyltransferase [EC:2.1.1.104] | (RefSeq) caffeoyl-CoA O-methyltransferase	Phenylpropanoid biosynthesis (ko00940);; Flavonoid biosynthesis (ko00941);; Stilbenoid, diarylheptanoid and gingerol biosynthesis (ko00945)	[Q]	Secondary metabolites biosynthesis, transport and catabolism	O-methyltransferase	Caffeoyl-CoA O-methyltransferase OS=Medicago sativa OX=3879 GN=CCOMT PE=1 SV=1	Q	Secondary metabolites biosynthesis, transport and catabolism	caffeoyl-CoA O-methyltransferase [Glycine max]	molecular function: catalytic activity (GO:0003824);; biological process: metabolic process (GO:0008152)
gene-GMIQD3	0.768614	0.852036	1.76962	1.36454	1.22355	1.4263	0.000146194	1.67595	up	--	--	Molecular Function: protein binding (GO:0005515);; Cellular Component: cellular_component (GO:0005575);; Cellular Component: intracellular (GO:0005622);; Cellular Component: cell (GO:0005623);; Cellular Component: cytoplasm (GO:0005737);; Cellular Component: cytosol (GO:0005829);; Cellular Component: cytoskeleton (GO:0005856);; Cellular Component: microtubule associated complex (GO:0005875);; Cel…	K14561|9.9e-12|gmx:102670478|K14561 U3 small nucleolar ribonucleoprotein protein IMP4 | (RefSeq) uncharacterized protein LOC102670478 isoform X1	Ribosome biogenesis in eukaryotes (ko03008)	--	--	Protein of unknown function (DUF4005)	Protein IQ-DOMAIN 14 OS=Arabidopsis thaliana OX=3702 GN=IQD14 PE=1 SV=1	S	Function unknown	protein IQ-DOMAIN 14 isoform X2 [Glycine max]	molecular function: binding (GO:0005488);; cellular component: cell (GO:0005623);; cellular component: cell part (GO:0044464);; cellular component: organelle (GO:0043226);; cellular component: macromolecular complex (GO:0032991);; cellular component: organelle part (GO:0044422);; cellular component: membrane (GO:0016020)
gene-LOC100775984	3.87032	5.53674	4.23674	0.491154	0.68228	0.859492	0.000179751	-1.31686	down	--	--	--	--	--	--	--	Plant protein of unknown function (DUF936)	--	S	Function unknown	uncharacterized protein LOC100775984 isoform X2 [Glycine max]	--
gene-LOC100777340	3.96104	3.97966	4.01898	5.5057	6.42422	4.22477	5.37611e-10	1.92411	up	[O]	Posttranslational modification, protein turnover, chaperones	Molecular Function: ATP binding (GO:0005524);; Molecular Function: phosphatidylinositol phosphate kinase activity (GO:0016307);; Molecular Function: metal ion binding (GO:0046872);;	K00921|0.0e+00|gmx:100777340|K00921 1-phosphatidylinositol-3-phosphate 5-kinase [EC:2.7.1.150] | (RefSeq) 1-phosphatidylinositol-3-phosphate 5-kinase FAB1B	Inositol phosphate metabolism (ko00562);; Phosphatidylinositol signaling system (ko04070);; Phagosome (ko04145)	[T]	Signal transduction mechanisms	Phosphatidylinositol-4-phosphate 5-Kinase	1-phosphatidylinositol-3-phosphate 5-kinase FAB1B OS=Arabidopsis thaliana OX=3702 GN=FAB1B PE=2 SV=1	T	Signal transduction mechanisms	1-phosphatidylinositol-3-phosphate 5-kinase FAB1B [Glycine max]	molecular function: binding (GO:0005488);; molecular function: catalytic activity (GO:0003824);; biological process: metabolic process (GO:0008152);; biological process: cellular process (GO:0009987)
gene-LOC100811911	4.16717	3.46224	3.22052	0.13069	0.210975	0.082015	1.03149e-07	-3.00306	down	--	--	--	--	--	--	--	--	--	S	Function unknown	uncharacterized protein LOC100811911 [Glycine max]	--
gene-LOC100818679	4.25845	3.75857	4.30162	3.13901	3.40959	2.48563	0.000572934	1.0326	up	--	--	Molecular Function: molecular_function (GO:0003674);; Molecular Function: nucleic acid binding (GO:0003676);; Molecular Function: RNA binding (GO:0003723);; Molecular Function: catalytic activity (GO:0003824);; Molecular Function: nuclease activity (GO:0004518);; Molecular Function: endonuclease activity (GO:0004519);; Molecular Function: binding (GO:0005488);; Cellular Component: cellular_compon…	--	--	[R]	General function prediction only	PPR repeat family	Pentatricopeptide repeat-containing protein At5g27270 OS=Arabidopsis thaliana OX=3702 GN=EMB976 PE=2 SV=2	S	Function unknown	pentatricopeptide repeat-containing protein At5g27270 [Glycine max]	molecular function: binding (GO:0005488);; molecular function: catalytic activity (GO:0003824);; biological process: metabolic process (GO:0008152);; biological process: cellular process (GO:0009987);; cellular component: cell (GO:0005623);; cellular component: cell part (GO:0044464);; cellular component: organelle (GO:0043226)
gene-LOC100808230	73.9154	79.8023	78.3811	88.3443	76.4764	86.5394	1.24869e-18	1.5651	up	[E]	Amino acid transport and metabolism	Molecular Function: aminopeptidase activity (GO:0004177);; Cellular Component: cytoplasm (GO:0005737);; Molecular Function: metalloexopeptidase activity (GO:0008235);; Molecular Function: manganese ion binding (GO:0030145);;	K01255|0.0e+00|gmx:100808230|K01255 leucyl aminopeptidase [EC:3.4.11.1] | (RefSeq) leucine aminopeptidase 1	Glutathione metabolism (ko00480)	[R]	General function prediction only	Cytosol aminopeptidase family, catalytic domain	Leucine aminopeptidase 2, chloroplastic OS=Arabidopsis thaliana OX=3702 GN=LAP2 PE=2 SV=2	E	Amino acid transport and metabolism	leucine aminopeptidase 1 [Glycine max]	molecular function: catalytic activity (GO:0003824);; biological process: metabolic process (GO:0008152);; cellular component: cell (GO:0005623);; cellular component: cell part (GO:0044464);; molecular function: binding (GO:0005488)
gene-LOC100305550	148.868	124.692	142.586	148.917	66.979	130.583	9.35842e-06	1.1384	up	[J]	Translation, ribosomal structure and biogenesis	Biological Process: maturation of LSU-rRNA (GO:0000470);; Molecular Function: RNA binding (GO:0003723);; Molecular Function: structural constituent of ribosome (GO:0003735);; Biological Process: translation (GO:0006412);; Cellular Component: cytosolic large ribosomal subunit (GO:0022625);;	K02865|2.4e-116|gmx:100305550|K02865 large subunit ribosomal protein L10Ae | (RefSeq) uncharacterized protein LOC100305550	Ribosome (ko03010)	[J]	Translation, ribosomal structure and biogenesis	Ribosomal protein L1p/L10e family	60S ribosomal protein L10a OS=Oryza sativa subsp. indica OX=39946 GN=RPL10A PE=3 SV=1	J	Translation, ribosomal structure and biogenesis	uncharacterized protein LOC100305550 [Glycine max]	biological process: metabolic process (GO:0008152);; biological process: cellular process (GO:0009987);; biological process: cellular component organization or biogenesis (GO:0071840);; molecular function: binding (GO:0005488);; molecular function: structural molecule activity (GO:0005198);; cellular component: cell (GO:0005623);; cellular component: macromolecular complex (GO:0032991);; cellular…
gene-LOC100781489	0.791021	0.549693	0.484171	1.93211	1.70265	2.34278	5.56849e-20	3.0208	up	--	--	Molecular Function: DNA binding (GO:0003677);; Cellular Component: nucleus (GO:0005634);;	K09287|1.9e-45|smo:SELMODRAFT_133669|K09287 RAV-like factor | (RefSeq) hypothetical protein	--	--	--	B3 DNA binding domain	B3 domain-containing transcription factor NGA3 OS=Arabidopsis thaliana OX=3702 GN=NGA3 PE=1 SV=1	K	Transcription	B3 domain-containing transcription factor NGA1 isoform X1 [Glycine max]	molecular function: binding (GO:0005488);; cellular component: cell (GO:0005623);; cellular component: organelle (GO:0043226);; cellular component: cell part (GO:0044464)
gene-LOC100816211	2.03805	2.56004	2.28292	0.031322	0	0.077978	2.77258e-06	-3.86074	down	--	--	--	--	--	--	--	--	--	--	--	myosin-5 [Glycine max]	--
gene-LOC100789747	11.0206	4.9568	7.68493	0.270985	0.121025	0.028592	5.3542e-12	-4.14535	down	[R]	General function prediction only	Molecular Function: GTPase activity (GO:0003924);; Molecular Function: GTP binding (GO:0005525);;	K07904|1.7e-117|gmx:100781889|K07904 Ras-related protein Rab-11A | (RefSeq) ras-related protein RABA1f	Endocytosis (ko04144)	[U]	Intracellular trafficking, secretion, and vesicular transport	Ras family	Ras-related protein RABA1f OS=Arabidopsis thaliana OX=3702 GN=RABA1F PE=2 SV=1	U	Intracellular trafficking, secretion, and vesicular transport	ras-related protein RABA1f [Glycine max]	molecular function: catalytic activity (GO:0003824);; molecular function: binding (GO:0005488)
gene-LOC100806426	4.70999	3.44736	4.29754	3.67363	3.72373	2.76876	8.11143e-05	1.18659	up	--	--	Biological Process: gene silencing by RNA (GO:0031047);;	K17046|9.4e-50|ini:109192967|K17046 protein DEK | (RefSeq) factor of DNA methylation 4-like	--	--	--	XS zinc finger domain	Protein INVOLVED IN DE NOVO 2 OS=Arabidopsis thaliana OX=3702 GN=IDN2 PE=1 SV=1	S	Function unknown	protein INVOLVED IN DE NOVO 2 isoform X1 [Glycine max]	biological process: cellular process (GO:0009987);; biological process: single-organism process (GO:0044699);; biological process: biological regulation (GO:0065007)
gene-LOC100816326	4.45143	3.82887	4.65585	0.415363	0.244965	0.313679	9.46124e-15	-2.26547	down	[R]	General function prediction only	Molecular Function: ADP binding (GO:0043531);;	K13457|3.1e-26|ini:109160543|K13457 disease resistance protein RPM1 | (RefSeq) disease resistance protein RPM1-like	Plant-pathogen interaction (ko04626)	--	--	NB-ARC domain	Probable disease resistance protein At4g33300 OS=Arabidopsis thaliana OX=3702 GN=At4g33300 PE=2 SV=3	S	Function unknown	probable disease resistance protein At4g33300 [Glycine max]	molecular function: binding (GO:0005488)
gene-LOC100783996	3.8788	3.04394	4.17052	0.445617	0.549811	0.81313	0.00197021	-1.12828	down	--	--	Molecular Function: electron carrier activity (GO:0009055);; Molecular Function: protein disulfide oxidoreductase activity (GO:0015035);;	K17479|4.1e-52|mdm:103454578|K17479 glutaredoxin domain-containing cysteine-rich protein 1 | (RefSeq) uncharacterized protein At3g28850	--	[O]	Posttranslational modification, protein turnover, chaperones	Glutaredoxin	Uncharacterized protein At3g28850 OS=Arabidopsis thaliana OX=3702 GN=At3g28850 PE=4 SV=1	O	Posttranslational modification, protein turnover, chaperones	uncharacterized protein At3g28850 [Glycine max]	molecular function: electron carrier activity (GO:0009055);; molecular function: catalytic activity (GO:0003824);; biological process: metabolic process (GO:0008152);; biological process: single-organism process (GO:0044699)
gene-LOC100799576	2.30583	1.13889	2.32954	25.1999	18.0101	19.8727	5.71191e-60	4.86202	up	--	--	Molecular Function: transcription factor activity, sequence-specific DNA binding (GO:0003700);; Cellular Component: nucleus (GO:0005634);; Biological Process: positive regulation of transcription, DNA-templated (GO:0045893);;	K14432|2.6e-181|gmx:100799576|K14432 ABA responsive element binding factor | (RefSeq) ABSCISIC ACID-INSENSITIVE 5-like protein 1	Plant hormone signal transduction (ko04075)	--	--	bZIP transcription factor	ABSCISIC ACID-INSENSITIVE 5-like protein 1 OS=Arabidopsis thaliana OX=3702 GN=DPBF2 PE=1 SV=1	K	Transcription	ABSCISIC ACID-INSENSITIVE 5-like protein 1 [Glycine max]	molecular function: nucleic acid binding transcription factor activity (GO:0001071);; biological process: biological regulation (GO:0065007);; cellular component: cell (GO:0005623);; cellular component: organelle (GO:0043226);; cellular component: cell part (GO:0044464)
gene-LOC100808990	4.03595	4.81749	4.20025	0	0	0	1.92382e-10	-7.49867	down	[R]	General function prediction only	Cellular Component: integral component of membrane (GO:0016021);; Molecular Function: oxidoreductase activity (GO:0016491);;	K22418|2.8e-185|gmx:100808990|K22418 11beta/17beta-hydroxysteroid dehydrogenase [EC:1.1.1.146 1.1.1.-] | (RefSeq) uncharacterized protein LOC100808990	--	[Q]	Secondary metabolites biosynthesis, transport and catabolism	short chain dehydrogenase	11-beta-hydroxysteroid dehydrogenase-like 3 OS=Arabidopsis thaliana OX=3702 GN=HSD3 PE=3 SV=1	Q	Secondary metabolites biosynthesis, transport and catabolism	uncharacterized protein LOC100808990 [Glycine max]	cellular component: membrane (GO:0016020);; cellular component: membrane part (GO:0044425);; molecular function: catalytic activity (GO:0003824)
gene-LOC100806835	9.33111	9.61951	10.9982	0.306988	0.436069	0.422381	1.70071e-21	-3.16092	down	--	--	--	--	--	--	--	Domain of unknown function (DUF702)	Protein LATERAL ROOT PRIMORDIUM 1 OS=Arabidopsis thaliana OX=3702 GN=LRP1 PE=1 SV=1	S	Function unknown	protein LATERAL ROOT PRIMORDIUM 1 [Glycine max]	--
gene-LOC100807420	0.331641	0.454761	0.305939	0.818036	0.736177	0.51923	4.64825e-09	2.33845	up	[G]	Carbohydrate transport and metabolism	Molecular Function: hydrolase activity, hydrolyzing O-glycosyl compounds (GO:0004553);; Biological Process: carbohydrate metabolic process (GO:0005975);; Cellular Component: anchored component of plasma membrane (GO:0046658);;	K19893|4.7e-136|cam:101496323|K19893 glucan endo-1,3-beta-glucosidase 5/6 [EC:3.2.1.39] | (RefSeq) glucan endo-1,3-beta-glucosidase 5	Starch and sucrose metabolism (ko00500)	--	--	Glycosyl hydrolases family 17	Glucan endo-1,3-beta-glucosidase 5 OS=Arabidopsis thaliana OX=3702 GN=At4g31140 PE=2 SV=1	G	Carbohydrate transport and metabolism	glucan endo-1,3-beta-glucosidase 5 [Glycine max]	molecular function: catalytic activity (GO:0003824);; biological process: metabolic process (GO:0008152);; cellular component: cell (GO:0005623);; cellular component: membrane (GO:0016020);; cellular component: membrane part (GO:0044425);; cellular component: cell part (GO:0044464)
gene-LOC102665387	1.02326	0.894524	0.612687	0.987377	1.04634	0.815215	8.93531e-05	1.60893	up	--	--	--	--	--	--	--	Glycogen recognition site of AMP-activated protein kinase	Protein PTST homolog 3, chloroplastic OS=Arabidopsis thaliana OX=3702 GN=PTST PE=1 SV=1	S	Function unknown	protein PTST homolog 3, chloroplastic [Glycine max]	--
gene-LOC100817357	9.47113	9.21772	10.4715	7.72152	5.10355	8.86181	1.67751e-05	1.00133	up	--	--	Cellular Component: endoplasmic reticulum (GO:0005783);; Cellular Component: endoplasmic reticulum membrane (GO:0005789);; Cellular Component: endoplasmic reticulum-Golgi intermediate compartment (GO:0005793);; Cellular Component: Golgi apparatus (GO:0005794);; Biological Process: intracellular protein transport (GO:0006886);; Biological Process: ER to Golgi vesicle-mediated transport (GO:0006888…	K20352|9.0e-116|gmx:100817357|K20352 p24 family protein delta-1 | (RefSeq) transmembrane emp24 domain-containing protein p24delta3-like	--	[U]	Intracellular trafficking, secretion, and vesicular transport	emp24/gp25L/p24 family/GOLD	Transmembrane emp24 domain-containing protein p24delta3 OS=Arabidopsis thaliana OX=3702 GN=At1g09580 PE=1 SV=1	U	Intracellular trafficking, secretion, and vesicular transport	transmembrane emp24 domain-containing protein p24delta3-like [Glycine max]	cellular component: cell (GO:0005623);; cellular component: organelle (GO:0043226);; cellular component: cell part (GO:0044464);; cellular component: membrane (GO:0016020);; cellular component: organelle part (GO:0044422);; cellular component: membrane part (GO:0044425);; biological process: localization (GO:0051179);; biological process: cellular process (GO:0009987);; biological process: cellul…
gene-LOC100817725	3.48362	4.80593	3.71899	0.019558	0.026006	0.032839	5.57888e-35	-5.54504	down	--	--	--	--	--	--	--	N-terminal C2 in EEIG1 and EHBP1 proteins	--	--	--	myosin-11 isoform X1 [Glycine max]	--
gene-LOC100797194	18.7339	24.8025	17.5017	2.73483	1.42223	2.93312	1.04002e-07	-1.68493	down	--	--	--	K02433|8.6e-17|apro:F751_6020|K02433 aspartyl-tRNA(Asn)/glutamyl-tRNA(Gln) amidotransferase subunit A [EC:6.3.5.6 6.3.5.7] | (RefSeq) Glutamyl-tRNA(Gln) amidotransferase subunit A	Aminoacyl-tRNA biosynthesis (ko00970)	[I]	Lipid transport and metabolism	CRAL/TRIO domain	--	I	Lipid transport and metabolism	phosphatidylinositol/phosphatidylcholine transfer protein SFH2 isoform X1 [Glycine max]	--
gene-LOC100793807	18.7129	11.1889	17.7769	2.36513	2.28279	2.93887	4.34398e-05	-1.17306	down	[L]	Replication, recombination and repair	Biological Process: maturation of LSU-rRNA from tricistronic rRNA transcript (SSU-rRNA, 5.8S rRNA, LSU-rRNA) (GO:0000463);; Molecular Function: RNA binding (GO:0003723);; Molecular Function: RNA helicase activity (GO:0003724);; Molecular Function: ATP binding (GO:0005524);; Cellular Component: nucleolus (GO:0005730);;	K13179|2.2e-283|gmx:100793807|K13179 ATP-dependent RNA helicase DDX18/HAS1 [EC:3.6.4.13] | (RefSeq) DEAD-box ATP-dependent RNA helicase 27	--	[A]	RNA processing and modification	DEAD/DEAH box helicase	DEAD-box ATP-dependent RNA helicase 27 OS=Oryza sativa subsp. japonica OX=39947 GN=Os03g0802700 PE=3 SV=1	A	RNA processing and modification	DEAD-box ATP-dependent RNA helicase 27 [Glycine max]	biological process: metabolic process (GO:0008152);; biological process: cellular process (GO:0009987);; biological process: cellular component organization or biogenesis (GO:0071840);; molecular function: binding (GO:0005488);; molecular function: catalytic activity (GO:0003824);; cellular component: cell (GO:0005623);; cellular component: organelle (GO:0043226);; cellular component: organelle p…
Glycine_max_newGene_1173	0.933184	0.843858	1.18215	1.04154	1.40301	0.502917	0.00107659	1.61591	up	--	--	--	--	--	--	--	--	--	--	--	hypothetical protein D0Y65_015669 [Glycine soja]	--
gene-LOC100784318	48.6396	47.0887	45.8783	32.9042	26.1957	78.1903	0.000644353	1.34795	up	[O]	Posttranslational modification, protein turnover, chaperones	Molecular Function: cysteine-type endopeptidase activity (GO:0004197);; Cellular Component: vacuole (GO:0005773);; Biological Process: vacuolar protein processing (GO:0006624);; Biological Process: proteolysis involved in cellular protein catabolic process (GO:0051603);;	K01369|1.5e-288|gmx:100784318|K01369 legumain [EC:3.4.22.34] | (RefSeq) vacuolar-processing enzyme	--	[O]	Posttranslational modification, protein turnover, chaperones	Peptidase C13 family	Vacuolar-processing enzyme OS=Phaseolus vulgaris OX=3885 PE=1 SV=1	O	Posttranslational modification, protein turnover, chaperones	vacuolar-processing enzyme [Glycine max]	molecular function: catalytic activity (GO:0003824);; biological process: metabolic process (GO:0008152);; cellular component: cell (GO:0005623);; cellular component: organelle (GO:0043226);; cellular component: cell part (GO:0044464);; biological process: cellular process (GO:0009987)
gene-LOC100793387	25.7633	25.0135	24.4771	2.37457	2.71954	3.2115	2.07372e-12	-1.7013	down	[P]	Inorganic ion transport and metabolism	Cellular Component: plasma membrane (GO:0005886);; Biological Process: potassium ion transport (GO:0006813);; Molecular Function: potassium ion transmembrane transporter activity (GO:0015079);; Cellular Component: membrane (GO:0016020);; Cellular Component: integral component of membrane (GO:0016021);;	K03549|0.0e+00|gmx:100793387|K03549 KUP system potassium uptake protein | (RefSeq) potassium transporter 8	--	--	--	K+ potassium transporter	Potassium transporter 8 OS=Arabidopsis thaliana OX=3702 GN=POT8 PE=2 SV=2	P	Inorganic ion transport and metabolism	potassium transporter 8 [Glycine max]	cellular component: cell (GO:0005623);; cellular component: membrane (GO:0016020);; cellular component: cell part (GO:0044464);; biological process: localization (GO:0051179);; molecular function: transporter activity (GO:0005215);; cellular component: membrane part (GO:0044425)
gene-LOC100792684	6.60633	6.04706	5.82926	0.224412	0	0.13178	3.11652e-09	-3.86678	down	[S]	Function unknown	Cellular Component: integral component of membrane (GO:0016021);;	K03260|1.9e-07|pda:103710480|K03260 translation initiation factor 4G | (RefSeq) eukaryotic translation initiation factor-like	RNA transport (ko03013)	[R]	General function prediction only	Proteolipid membrane potential modulator	Hydrophobic protein LTI6A OS=Oryza sativa subsp. japonica OX=39947 GN=LTI6A PE=2 SV=1	S	Function unknown	hydrophobic protein RCI2B [Glycine max]	cellular component: membrane (GO:0016020);; cellular component: membrane part (GO:0044425)
gene-LOC100801780	21.5707	27.4587	20.6097	0.017642	0.354541	0.08537	1.81031e-15	-5.35104	down	--	--	Molecular Function: DNA binding (GO:0003677);; Molecular Function: transcription factor activity, sequence-specific DNA binding (GO:0003700);; Cellular Component: nucleus (GO:0005634);;	K09286|4.8e-76|var:108320556|K09286 EREBP-like factor | (RefSeq) dehydration-responsive element-binding protein 3-like	--	--	--	AP2 domain	Dehydration-responsive element-binding protein 3 OS=Arabidopsis thaliana OX=3702 GN=DREB3 PE=2 SV=1	K	Transcription	ethylene-responsive transcription factor ERF036 [Glycine max]	molecular function: binding (GO:0005488);; molecular function: nucleic acid binding transcription factor activity (GO:0001071);; biological process: biological regulation (GO:0065007);; cellular component: cell (GO:0005623);; cellular component: organelle (GO:0043226);; cellular component: cell part (GO:0044464)
gene-LOC100799947	2.08218	2.40881	2.90175	4.32792	4.10435	12.3358	1.54212e-10	2.84906	up	[GER]	Carbohydrate transport and metabolism;; Amino acid transport and metabolism;; General function prediction only	Cellular Component: integral component of membrane (GO:0016021);; Molecular Function: transmembrane transporter activity (GO:0022857);;	K17500|6.1e-57|nto:104085001|K17500 integrin-linked kinase-associated serine/threonine phosphatase 2C [EC:3.1.3.16] | (RefSeq) WAT1-related protein At3g18200 isoform X1	--	--	--	EamA-like transporter family	WAT1-related protein At5g07050 OS=Arabidopsis thaliana OX=3702 GN=At5g07050 PE=2 SV=1	S	Function unknown	WAT1-related protein At5g07050 [Glycine max]	cellular component: membrane (GO:0016020);; cellular component: membrane part (GO:0044425);; molecular function: transporter activity (GO:0005215);; biological process: localization (GO:0051179)
gene-LOC100796145	10.0623	8.54697	8.81993	6.85723	6.43893	7.53718	4.51722e-07	1.06113	up	[J]	Translation, ribosomal structure and biogenesis	Molecular Function: GTPase activity (GO:0003924);; Molecular Function: GTP binding (GO:0005525);;	K06949|3.3e-267|gmx:100796145|K06949 ribosome biogenesis GTPase / thiamine phosphate phosphatase [EC:3.6.1.- 3.1.3.100] | (RefSeq) small ribosomal subunit biogenesis GTPase RsgA 1, mitochondrial	Thiamine metabolism (ko00730)	--	--	RsgA GTPase	Small ribosomal subunit biogenesis GTPase RsgA 1, mitochondrial OS=Arabidopsis thaliana OX=3702 GN=rsgA PE=2 SV=1	S	Function unknown	small ribosomal subunit biogenesis GTPase RsgA 1, mitochondrial [Glycine max]	molecular function: catalytic activity (GO:0003824);; molecular function: binding (GO:0005488)
gene-LOC100815507	7.715	8.62884	8.21586	1.11092	0.462526	1.11607	7.30889e-08	-1.72814	down	[V]	Defense mechanisms	Molecular Function: hydrolase activity (GO:0016787);;	K22763|3.3e-78|lja:Lj2g3v1989220.3|K22763 deubiquitinase DESI2 [EC:3.4.19.12] | (RefSeq) Lj2g3v1989220.3; -	--	[T]	Signal transduction mechanisms	Nudix hydrolase domain	Nudix hydrolase 8 OS=Arabidopsis thaliana OX=3702 GN=NUDT8 PE=2 SV=2	T	Signal transduction mechanisms	uncharacterized protein LOC100815507 isoform X1 [Glycine max]	molecular function: catalytic activity (GO:0003824)
gene-LOC106798868	0.762875	1.81526	0.748118	0.080926	0.046076	0.098601	0.00299503	-2.18757	down	--	--	Cellular Component: nucleus (GO:0005634);; Biological Process: negative regulation of transcription, DNA-templated (GO:0045892);;	K01870|1.4e-08|smo:SELMODRAFT_437676|K01870 isoleucyl-tRNA synthetase [EC:6.1.1.5] | (RefSeq) hypothetical protein	Aminoacyl-tRNA biosynthesis (ko00970)	--	--	Transcriptional repressor, ovate	Transcription repressor OFP5 OS=Arabidopsis thaliana OX=3702 GN=OFP5 PE=1 SV=1	S	Function unknown	transcription repressor OFP5-like [Glycine max]	cellular component: cell (GO:0005623);; cellular component: organelle (GO:0043226);; cellular component: cell part (GO:0044464);; biological process: biological regulation (GO:0065007)
gene-LOC100793443	1.46239	0.945452	1.40093	0.141392	0.089942	0.094407	3.67655e-05	-2.02123	down	--	--	--	--	--	--	--	Cell division control protein 24, OB domain 3	--	S	Function unknown	uncharacterized protein LOC100793443 isoform X1 [Glycine max]	--
gene-LOC100527236	5.61301	6.30344	7.89987	0.316554	0.178358	1.20089	0.00178684	-2.02043	down	--	--	--	K23541|3.8e-26|egu:105051209|K23541 Ca2+/H+ antiporter, TMEM165/GDT1 family | (RefSeq) LOW QUALITY PROTEIN: uncharacterized protein LOC105051209	--	--	--	P21-Rho-binding domain	CRIB domain-containing protein RIC4 OS=Arabidopsis thaliana OX=3702 GN=RIC4 PE=1 SV=1	S	Function unknown	uncharacterized protein LOC100527236 isoform X1 [Glycine max]	--
gene-LOC100803724	18.3569	22.7639	17.4106	3.50815	3.53259	2.23992	0.000861063	-1.15961	down	[J]	Translation, ribosomal structure and biogenesis	Biological Process: biosynthetic process (GO:0009058);; Molecular Function: pyridoxal phosphate binding (GO:0030170);; Molecular Function: methionine S-methyltransferase activity (GO:0030732);; Biological Process: methylation (GO:0032259);;	K08247|0.0e+00|gmx:100803724|K08247 methionine S-methyltransferase [EC:2.1.1.12] | (RefSeq) methionine S-methyltransferase isoform X1	Selenocompound metabolism (ko00450)	--	--	Aminotransferase class I and II	Methionine S-methyltransferase OS=Arabidopsis thaliana OX=3702 GN=MMT1 PE=1 SV=1	S	Function unknown	methionine S-methyltransferase [Glycine max]	biological process: metabolic process (GO:0008152);; molecular function: binding (GO:0005488);; molecular function: catalytic activity (GO:0003824)
gene-LOC100809832	10.99	15.9092	11.535	0	0	0.102393	1.95839e-06	-5.80104	down	[M]	Cell wall/membrane/envelope biogenesis	Cellular Component: cytoplasm (GO:0005737);; Cellular Component: integral component of membrane (GO:0016021);; Biological Process: D-xylose metabolic process (GO:0042732);; Molecular Function: UDP-glucuronate decarboxylase activity (GO:0048040);; Molecular Function: NAD+ binding (GO:0070403);;	K08678|4.0e-248|gmx:100809832|K08678 UDP-glucuronate decarboxylase [EC:4.1.1.35] | (RefSeq) UDP-glucuronic acid decarboxylase 2	Amino sugar and nucleotide sugar metabolism (ko00520)	[GM]	Carbohydrate transport and metabolism;; Cell wall/membrane/envelope biogenesis	GDP-mannose 4,6 dehydratase	UDP-glucuronic acid decarboxylase 2 OS=Arabidopsis thaliana OX=3702 GN=UXS2 PE=1 SV=1	--	--	UDP-glucuronic acid decarboxylase 2 [Glycine max]	cellular component: cell (GO:0005623);; cellular component: cell part (GO:0044464);; cellular component: membrane (GO:0016020);; cellular component: membrane part (GO:0044425);; biological process: metabolic process (GO:0008152);; biological process: single-organism process (GO:0044699);; molecular function: catalytic activity (GO:0003824);; molecular function: binding (GO:0005488)
gene-LOC100804995	22.4742	22.3199	21.8038	19.963	21.7436	19.0855	5.5835e-08	1.33338	up	[T]	Signal transduction mechanisms	Molecular Function: protein serine/threonine kinase activity (GO:0004674);; Molecular Function: ATP binding (GO:0005524);; Cellular Component: cytoplasm (GO:0005737);; Biological Process: regulation of mitotic cell cycle (GO:0007346);; Biological Process: signal transduction by protein phosphorylation (GO:0023014);; Biological Process: stress-activated protein kinase signaling cascade (GO:0031098…	K04411|1.4e-87|cre:CHLREDRAFT_127161|K04411 serine/threonine kinase 4 | (RefSeq) MAPKKKK1; mitogen activated protein kinase kinase kinase kinase 1	--	[T]	Signal transduction mechanisms	Protein kinase domain	MAP3K epsilon protein kinase 1 OS=Arabidopsis thaliana OX=3702 GN=M3KE1 PE=1 SV=1	T	Signal transduction mechanisms	serine/threonine-protein kinase dst1 isoform X1 [Glycine max]	molecular function: catalytic activity (GO:0003824);; biological process: metabolic process (GO:0008152);; biological process: cellular process (GO:0009987);; molecular function: binding (GO:0005488);; cellular component: cell (GO:0005623);; cellular component: cell part (GO:0044464);; biological process: biological regulation (GO:0065007);; biological process: signaling (GO:0023052);; biological…
gene-LOC100776472	1.74523	3.18782	1.87954	16.5658	13.622	16.4076	3.8587e-40	4.16246	up	[E]	Amino acid transport and metabolism	Cellular Component: plasma membrane (GO:0005886);; Molecular Function: peptide:proton symporter activity (GO:0015333);; Cellular Component: integral component of membrane (GO:0016021);; Molecular Function: oligopeptide transmembrane transporter activity (GO:0035673);; Molecular Function: peptide transmembrane transporter activity (GO:1904680);;	K14638|4.5e-200|cmax:111493070|K14638 solute carrier family 15 (peptide/histidine transporter), member 3/4 | (RefSeq) protein NRT1/ PTR FAMILY 2.13-like	--	[E]	Amino acid transport and metabolism	POT family	Protein NRT1/ PTR FAMILY 2.13 OS=Arabidopsis thaliana OX=3702 GN=NPF2.13 PE=1 SV=1	E	Amino acid transport and metabolism	protein NRT1/ PTR FAMILY 2.13 [Glycine max]	cellular component: cell (GO:0005623);; cellular component: membrane (GO:0016020);; cellular component: cell part (GO:0044464);; molecular function: transporter activity (GO:0005215);; biological process: single-organism process (GO:0044699);; biological process: localization (GO:0051179);; cellular component: membrane part (GO:0044425)
gene-LOC100793054	0.082993	0.034032	0.032384	1.08114	1.06808	0.943644	1.97742e-33	5.61578	up	[R]	General function prediction only	Molecular Function: ADP binding (GO:0043531);;	K13415|4.5e-31|mdm:103413440|K13415 protein brassinosteroid insensitive 1 [EC:2.7.10.1 2.7.11.1] | (RefSeq) uncharacterized protein LOC103413440 isoform X1	Plant hormone signal transduction (ko04075)	--	--	NB-ARC domain	Probable disease resistance protein At5g66900 OS=Arabidopsis thaliana OX=3702 GN=At5g66900 PE=3 SV=1	S	Function unknown	probable disease resistance protein At5g66900 [Glycine max]	molecular function: binding (GO:0005488)
gene-LOC100816096	33.9772	20.3043	34.3808	31.4962	15.5901	24.7362	0.000155364	1.11588	up	[J]	Translation, ribosomal structure and biogenesis	Molecular Function: tRNA binding (GO:0000049);; Biological Process: tRNA wobble position uridine thiolation (GO:0002143);; Cellular Component: cytosolic tRNA wobble base thiouridylase complex (GO:0002144);; Molecular Function: nucleotidyltransferase activity (GO:0016779);; Biological Process: protein urmylation (GO:0032447);;	K14168|1.3e-204|gmx:100816096|K14168 cytoplasmic tRNA 2-thiolation protein 1 [EC:2.7.7.-] | (RefSeq) uncharacterized protein LOC100816096	Sulfur relay system (ko04122)	[R]	General function prediction only	Zinc-ribbon	Cytoplasmic tRNA 2-thiolation protein 1 OS=Arabidopsis thaliana OX=3702 GN=NCS6 PE=2 SV=2	--	--	cytoplasmic tRNA 2-thiolation protein 1-like [Glycine max]	molecular function: binding (GO:0005488);; biological process: metabolic process (GO:0008152);; biological process: cellular process (GO:0009987);; cellular component: cell (GO:0005623);; cellular component: macromolecular complex (GO:0032991);; cellular component: cell part (GO:0044464);; molecular function: catalytic activity (GO:0003824)
gene-LOC100789427	9.34455	7.9682	9.33482	0.201926	0.445359	0.044647	1.05437e-07	-3.51444	down	--	--	Molecular Function: ATP binding (GO:0005524);; Molecular Function: 1-phosphatidylinositol-4-phosphate 5-kinase activity (GO:0016308);;	K00889|0.0e+00|gmx:100789427|K00889 1-phosphatidylinositol-4-phosphate 5-kinase [EC:2.7.1.68] | (RefSeq) phosphatidylinositol 4-phosphate 5-kinase 1	Inositol phosphate metabolism (ko00562);; Phosphatidylinositol signaling system (ko04070);; Endocytosis (ko04144)	[T]	Signal transduction mechanisms	Phosphatidylinositol-4-phosphate 5-Kinase	Phosphatidylinositol 4-phosphate 5-kinase 1 OS=Arabidopsis thaliana OX=3702 GN=PIP5K1 PE=1 SV=1	T	Signal transduction mechanisms	phosphatidylinositol 4-phosphate 5-kinase 1 [Glycine max]	molecular function: binding (GO:0005488);; molecular function: catalytic activity (GO:0003824);; biological process: metabolic process (GO:0008152);; biological process: cellular process (GO:0009987);; biological process: single-organism process (GO:0044699)
gene-LOC100820530	6.17094	4.71114	7.56737	0.032653	0	0	1.43595e-14	-6.62282	down	--	--	Molecular Function: DNA binding (GO:0003677);; Cellular Component: nucleus (GO:0005634);;	--	--	--	--	Homeodomain	WUSCHEL-related homeobox 8 OS=Oryza sativa subsp. japonica OX=39947 GN=WOX8 PE=2 SV=1	K	Transcription	WUSCHEL-related homeobox 8 [Glycine max]	molecular function: binding (GO:0005488);; cellular component: cell (GO:0005623);; cellular component: organelle (GO:0043226);; cellular component: cell part (GO:0044464)
Glycine_max_newGene_7758	9.35644	11.4488	7.55524	2.37452	0.599252	1.15143	0.00878662	-1.3378	down	--	--	--	--	--	--	--	--	--	--	--	hypothetical protein GLYMA_02G208100 [Glycine max]	--
gene-LOC100776338	2.92485	2.82188	3.26869	0.021037	0.049495	0.133712	6.95555e-12	-3.81738	down	[G]	Carbohydrate transport and metabolism	Molecular Function: polygalacturonase activity (GO:0004650);; Cellular Component: extracellular region (GO:0005576);; Biological Process: carbohydrate metabolic process (GO:0005975);; Biological Process: cell wall organization (GO:0071555);;	K01213|1.1e-174|aip:107645968|K01213 galacturan 1,4-alpha-galacturonidase [EC:3.2.1.67] | (RefSeq) polygalacturonase At1g48100-like	Pentose and glucuronate interconversions (ko00040)	--	--	Glycosyl hydrolases family 28	Polygalacturonase At1g48100 OS=Arabidopsis thaliana OX=3702 GN=At1g48100 PE=2 SV=1	G	Carbohydrate transport and metabolism	polygalacturonase At1g48100 [Glycine max]	molecular function: catalytic activity (GO:0003824);; cellular component: extracellular region (GO:0005576);; biological process: metabolic process (GO:0008152);; biological process: cellular process (GO:0009987);; biological process: cellular component organization or biogenesis (GO:0071840)
gene-LOC100795063	1.37869	1.04437	1.37885	3.55422	3.24942	2.77021	1.32169e-21	2.77575	up	--	--	Molecular Function: DNA binding (GO:0003677);;	K15777|5.1e-39|mesc:110630336|K15777 4,5-DOPA dioxygenase extradiol [EC:1.13.11.-] | (RefSeq) uncharacterized protein LOC110630336	Betalain biosynthesis (ko00965)	--	--	ZF-HD protein dimerisation region	Zinc-finger homeodomain protein 1 OS=Oryza sativa subsp. japonica OX=39947 GN=ZHD1 PE=2 SV=1	S	Function unknown	zinc-finger homeodomain protein 1 isoform X1 [Glycine max]	molecular function: binding (GO:0005488)
gene-LOC100815378	5.70385	3.65649	5.12443	5.92288	6.57576	4.97647	1.93833e-08	1.74044	up	--	--	Cellular Component: integral component of membrane (GO:0016021);;	K11844|1.5e-60|cmo:103483482|K11844 ubiquitin carboxyl-terminal hydrolase 16/45 [EC:3.4.19.12] | (RefSeq) ubiquitin carboxyl-terminal hydrolase 2	--	--	--	Zein-binding	Myosin-binding protein 2 OS=Arabidopsis thaliana OX=3702 GN=MYOB2 PE=1 SV=1	S	Function unknown	probable myosin-binding protein 6 isoform X1 [Glycine max]	cellular component: membrane (GO:0016020);; cellular component: membrane part (GO:0044425)
gene-LOC100812470	20.1443	38.1356	20.9003	2.14599	1.04548	5.65541	0.00258642	-1.71836	down	--	--	Cellular Component: extracellular space (GO:0005615);; Biological Process: lipid metabolic process (GO:0006629);;	K12382|6.3e-93|gmx:100802366|K12382 saposin | (RefSeq) prosaposin isoform X3	Sphingolipid metabolism (ko00600)	[IG]	Lipid transport and metabolism;; Carbohydrate transport and metabolism	Saposin-like type B, region 1	--	--	--	Prosaposin isoform B [Glycine soja]	cellular component: extracellular region (GO:0005576);; cellular component: extracellular region part (GO:0044421);; biological process: metabolic process (GO:0008152);; biological process: single-organism process (GO:0044699)
gene-LOC100805280	2.28417	1.95241	2.51712	0.181769	0.203185	0.059264	1.34787e-05	-2.33615	down	--	--	--	--	--	--	--	--	Uncharacterized protein At1g65710 OS=Arabidopsis thaliana OX=3702 GN=At1g65710 PE=2 SV=1	S	Function unknown	dentin sialophosphoprotein isoform X2 [Glycine max]	--
gene-LOC100795901	14.922	21.1117	16.3146	0.131706	0.05744	0	5.97878e-29	-6.36931	down	--	--	Molecular Function: electron carrier activity (GO:0009055);; Cellular Component: anchored component of plasma membrane (GO:0046658);;	--	--	--	--	Plastocyanin-like domain	Early nodulin-like protein 2 OS=Arabidopsis thaliana OX=3702 GN=At4g27520 PE=1 SV=1	S	Function unknown	uncharacterized protein LOC100795901 precursor [Glycine max]	molecular function: electron carrier activity (GO:0009055);; cellular component: cell (GO:0005623);; cellular component: membrane (GO:0016020);; cellular component: membrane part (GO:0044425);; cellular component: cell part (GO:0044464)
gene-LOC100802114	11.4208	7.40768	10.7359	0	0	0	9.41021e-16	-8.82295	down	[R]	General function prediction only	Biological Process: lipid catabolic process (GO:0016042);; Molecular Function: hydrolase activity (GO:0016787);;	--	--	[I]	Lipid transport and metabolism	Patatin-like phospholipase	Patatin-like protein 1 OS=Arabidopsis thaliana OX=3702 GN=PLP1 PE=1 SV=2	--	--	patatin group A-3-like precursor [Glycine max]	biological process: metabolic process (GO:0008152);; biological process: single-organism process (GO:0044699);; molecular function: catalytic activity (GO:0003824)
gene-LOC100787175	3.85385	6.36934	3.55878	0.098136	0.091382	0.084901	1.3159e-22	-4.07204	down	[V]	Defense mechanisms	Molecular Function: ATP binding (GO:0005524);; Cellular Component: integral component of membrane (GO:0016021);; Molecular Function: ATPase activity (GO:0016887);;	K08712|3.2e-131|gsl:Gasu_29800|K08712 ATP-binding cassette, subfamily G (WHITE), member 2, SNQ2 | (RefSeq) ABC transporter, ATP-binding protein	ABC transporters (ko02010)	[Q]	Secondary metabolites biosynthesis, transport and catabolism	ABC-2 type transporter	ABC transporter G family member 39 OS=Arabidopsis thaliana OX=3702 GN=ABCG39 PE=3 SV=1	Q	Secondary metabolites biosynthesis, transport and catabolism	pleiotropic drug resistance protein 2 [Glycine max]	molecular function: binding (GO:0005488);; cellular component: membrane (GO:0016020);; cellular component: membrane part (GO:0044425);; molecular function: catalytic activity (GO:0003824)
gene-LOC100777473	6.24144	11.1287	7.62851	1.21557	1.07372	0.82226	0.000125667	-1.52158	down	--	--	Molecular Function: kinase activity (GO:0016301);;	K13415|3.7e-07|lja:Lj1g3v1222380.1|K13415 protein brassinosteroid insensitive 1 [EC:2.7.10.1 2.7.11.1] | (RefSeq) Lj1g3v1222380.1; -	Plant hormone signal transduction (ko04075)	[R]	General function prediction only	Leucine rich repeat	--	S	Function unknown	leucine-rich repeat protein FLOR 1 [Glycine max]	molecular function: catalytic activity (GO:0003824)
gene-LOC100812823	3.77122	2.93649	3.38894	4.18841	4.39741	5.97373	8.99967e-15	1.97602	up	[G]	Carbohydrate transport and metabolism	Molecular Function: hydrolase activity, hydrolyzing O-glycosyl compounds (GO:0004553);; Molecular Function: xylan 1,4-beta-xylosidase activity (GO:0009044);; Cellular Component: plant-type cell wall (GO:0009505);; Biological Process: arabinan catabolic process (GO:0031222);; Biological Process: xylan catabolic process (GO:0045493);; Molecular Function: alpha-L-arabinofuranosidase activity (GO:004…	K15920|4.9e-268|nnu:104600010|K15920 xylan 1,4-beta-xylosidase [EC:3.2.1.37] | (RefSeq) beta-xylosidase/alpha-L-arabinofuranosidase 2-like	Amino sugar and nucleotide sugar metabolism (ko00520)	--	--	Glycosyl hydrolase family 3 C-terminal domain	Beta-D-xylosidase 1 OS=Arabidopsis thaliana OX=3702 GN=BXL1 PE=1 SV=1	G	Carbohydrate transport and metabolism	beta-D-xylosidase 1 [Glycine max]	molecular function: catalytic activity (GO:0003824);; cellular component: cell (GO:0005623);; cellular component: cell part (GO:0044464);; biological process: metabolic process (GO:0008152);; biological process: single-organism process (GO:0044699);; biological process: cellular process (GO:0009987)
gene-LOC100819752	6.9188	3.31488	6.00464	37.1532	32.3775	32.2526	2.12606e-42	4.02678	up	--	--	Cellular Component: integral component of membrane (GO:0016021);;	--	--	--	--	--	--	--	--	uncharacterized protein LOC100819752 isoform X1 [Glycine max]	cellular component: membrane (GO:0016020);; cellular component: membrane part (GO:0044425)
gene-LOC100809704	0.967916	0.519917	0.73132	0.802991	1.18503	0.66582	0.000480928	1.73569	up	[T]	Signal transduction mechanisms	Molecular Function: protein kinase activity (GO:0004672);; Molecular Function: ATP binding (GO:0005524);; Cellular Component: membrane (GO:0016020);; Cellular Component: integral component of membrane (GO:0016021);;	K13415|2.9e-43|pda:103704826|K13415 protein brassinosteroid insensitive 1 [EC:2.7.10.1 2.7.11.1] | (RefSeq) LOW QUALITY PROTEIN: brassinosteroid LRR receptor kinase BRI1	Plant hormone signal transduction (ko04075)	--	--	Protein tyrosine and serine/threonine kinase	Calmodulin-binding receptor kinase CaMRLK OS=Arabidopsis thaliana OX=3702 GN=CAMRLK PE=1 SV=1	T	Signal transduction mechanisms	calmodulin-binding receptor kinase CaMRLK [Glycine max]	molecular function: catalytic activity (GO:0003824);; biological process: metabolic process (GO:0008152);; biological process: cellular process (GO:0009987);; molecular function: binding (GO:0005488);; cellular component: membrane (GO:0016020);; cellular component: membrane part (GO:0044425)
gene-LOC100781363	10.1053	10.0259	12.1031	0.384129	0	0	0.00903658	-3.723	down	--	--	Cellular Component: extracellular region (GO:0005576);; Molecular Function: growth factor activity (GO:0008083);; Biological Process: cell proliferation (GO:0008283);;	--	--	--	--	Phytosulfokine precursor protein (PSK)	Putative phytosulfokines 6 OS=Arabidopsis thaliana OX=3702 GN=PSK6 PE=2 SV=2	S	Function unknown	putative phytosulfokines 6 isoform X1 [Glycine max]	cellular component: extracellular region (GO:0005576);; molecular function: binding (GO:0005488);; biological process: single-organism process (GO:0044699)
gene-LOC100815717	27.8663	24.7459	27.9647	3.65185	2.72257	4.7235	4.05632e-11	-1.41236	down	[M]	Cell wall/membrane/envelope biogenesis	Molecular Function: protein serine/threonine kinase activity (GO:0004674);; Molecular Function: ATP binding (GO:0005524);; Biological Process: peptidyl-serine phosphorylation (GO:0018105);; Biological Process: intracellular signal transduction (GO:0035556);;	K08790|1.7e-293|gmx:100815717|K08790 serine/threonine kinase 38 [EC:2.7.11.1] | (RefSeq) serine/threonine-protein kinase tricorner	--	[R]	General function prediction only	Protein kinase domain	Probable serine/threonine protein kinase IRE4 OS=Arabidopsis thaliana OX=3702 GN=IRE4 PE=2 SV=1	T	Signal transduction mechanisms	serine/threonine-protein kinase tricorner [Glycine max]	molecular function: catalytic activity (GO:0003824);; biological process: metabolic process (GO:0008152);; biological process: cellular process (GO:0009987);; molecular function: binding (GO:0005488);; biological process: signaling (GO:0023052);; biological process: single-organism process (GO:0044699);; biological process: response to stimulus (GO:0050896);; biological process: biological regula…
gene-LOC102666599	8.54222	8.25031	11.4677	0.923159	1.12088	1.50398	0.00246393	-1.4484	down	--	--	--	--	--	--	--	--	--	--	--	hypothetical protein glysoja_043038 [Glycine soja]	--
gene-LOC100778030	1.33906	2.51619	1.23756	0.123148	0.06745	0.257326	0.00276044	-1.90278	down	--		Molecular Function: protein tyrosine kinase activity (GO:0004713);; Molecular Function: ATP binding (GO:0005524);; Cellular Component: integral component of membrane (GO:0016021);;	K24104|3.2e-75|thj:104799061|K24104 GPN-loop GTPase | (RefSeq) LOW QUALITY PROTEIN: uncharacterized protein LOC104799061	--	--	--	Protein tyrosine and serine/threonine kinase	Receptor-like serine/threonine-protein kinase SD1-8 OS=Arabidopsis thaliana OX=3702 GN=SD18 PE=1 SV=1	T	Signal transduction mechanisms	receptor-like serine/threonine-protein kinase SD1-8 isoform X1 [Glycine max]	molecular function: catalytic activity (GO:0003824);; biological process: metabolic process (GO:0008152);; biological process: cellular process (GO:0009987);; molecular function: binding (GO:0005488);; cellular component: membrane (GO:0016020);; cellular component: membrane part (GO:0044425)
gene-LOC100500129	11.1098	10.6952	11.9341	10.7127	5.29469	10.5334	0.000112087	1.06212	up	--	--	Cellular Component: DNA-directed RNA polymerase V complex (GO:0000419);; Biological Process: regulation of DNA methylation (GO:0044030);;	--	--	--	--	RNA-directed DNA methylation 1	Protein RDM1 OS=Arabidopsis thaliana OX=3702 GN=RDM1 PE=1 SV=1	S	Function unknown	uncharacterized protein LOC100500129 [Glycine max]	cellular component: cell (GO:0005623);; cellular component: macromolecular complex (GO:0032991);; cellular component: organelle (GO:0043226);; cellular component: organelle part (GO:0044422);; cellular component: cell part (GO:0044464);; biological process: biological regulation (GO:0065007)
gene-LOC100805206	1.42065	0.828086	1.28793	1.99027	2.95351	1.90903	7.07354e-10	2.43283	up	[LK]	Replication, recombination and repair;; Transcription	Molecular Function: nucleic acid binding (GO:0003676);; Molecular Function: ATP binding (GO:0005524);; Biological Process: DNA repair (GO:0006281);;	K03655|8.5e-53|bna:106406031|K03655 ATP-dependent DNA helicase RecG [EC:3.6.4.12] | (RefSeq) ATP-dependent DNA helicase homolog RECG, chloroplastic isoform X2	Homologous recombination (ko03440)	[A]	RNA processing and modification	Helicase conserved C-terminal domain	ATP-dependent DNA helicase At3g02060, chloroplastic OS=Arabidopsis thaliana OX=3702 GN=At3g02060 PE=2 SV=1	A	RNA processing and modification	ATP-dependent DNA helicase At3g02060, chloroplastic [Glycine max]	molecular function: binding (GO:0005488);; biological process: metabolic process (GO:0008152);; biological process: cellular process (GO:0009987);; biological process: response to stimulus (GO:0050896)
gene-LOC100788617	9.88732	3.50506	9.21546	0.580242	0.340619	0.699329	1.00258e-06	-2.28187	down	--	--	Cellular Component: nucleus (GO:0005634);; Molecular Function: protein dimerization activity (GO:0046983);;	K16189|2.6e-15|ccaj:109789483|K16189 phytochrome-interacting factor 4 | (RefSeq) transcription factor PIF4-like isoform X1	Plant hormone signal transduction (ko04075)	--	--	Helix-loop-helix DNA-binding domain	Transcription factor UNE10 OS=Arabidopsis thaliana OX=3702 GN=UNE10 PE=2 SV=1	K	Transcription	transcription factor UNE10 [Glycine max]	cellular component: cell (GO:0005623);; cellular component: organelle (GO:0043226);; cellular component: cell part (GO:0044464);; molecular function: binding (GO:0005488)
gene-SALI5-4A	4815.62	5213.42	5091.96	38.5093	26.7216	69.9701	6.71466e-66	-5.33512	down	--	--	--	--	--	--	--	BURP domain	Embryonic abundant protein USP92 OS=Vicia faba OX=3906 PE=2 SV=1	S	Function unknown	sali5-4a protein precursor [Glycine max]	--
gene-LOC100805866	2.28989	1.83867	1.70853	0.196855	0.061658	0.055018	2.44005e-06	-2.5803	down	--	--	--	--	--	--	--	Protein of unknown function (DUF1005)	--	S	Function unknown	uncharacterized protein LOC100805866 [Glycine max]	--
gene-LOC732576	93.2026	2.0408	102.874	0	0	0	1.64791e-08	-7.78408	down	--	--	Molecular Function: carbohydrate binding (GO:0030246);;	--	--	--	--	Legume lectin domain	Lectin DB58 OS=Vigna unguiculata subsp. cylindrica OX=3840 PE=1 SV=2	T	Signal transduction mechanisms	hypothetical protein GLYMA_02G156800 [Glycine max]	molecular function: binding (GO:0005488)
gene-LOC100807692	6.44038	11.7709	6.51488	0.409932	0.563285	0.055061	3.26946e-05	-2.88382	down	[T]	Signal transduction mechanisms	Molecular Function: ATP binding (GO:0005524);; Cellular Component: plasma membrane (GO:0005886);; Cellular Component: integral component of membrane (GO:0016021);; Molecular Function: ATPase activity (GO:0016887);; Molecular Function: ATPase activity, coupled to transmembrane movement of substances (GO:0042626);; Biological Process: transmembrane transport (GO:0055085);;	K05681|1.9e-61|cme:CYME_CMS467C|K05681 ATP-binding cassette, subfamily G (WHITE), member 2 | (RefSeq) ATP-binding cassette, sub-family G, member 2	ABC transporters (ko02010)	[Q]	Secondary metabolites biosynthesis, transport and catabolism	ABC-2 type transporter	ABC transporter G family member 15 OS=Arabidopsis thaliana OX=3702 GN=ABCG15 PE=2 SV=2	Q	Secondary metabolites biosynthesis, transport and catabolism	ABC transporter G family member 15 isoform X1 [Glycine max]	molecular function: binding (GO:0005488);; cellular component: cell (GO:0005623);; cellular component: membrane (GO:0016020);; cellular component: cell part (GO:0044464);; cellular component: membrane part (GO:0044425);; molecular function: catalytic activity (GO:0003824);; molecular function: transporter activity (GO:0005215);; biological process: localization (GO:0051179)
gene-LOC112999556	4.70628	5.36805	4.63704	0.482051	0.531318	0.240591	3.40992e-07	-2.02675	down	[L]	Replication, recombination and repair	Biological Process: signal transduction (GO:0007165);; Cellular Component: integral component of membrane (GO:0016021);; Molecular Function: ADP binding (GO:0043531);;	K00695|1.4e-96|mtr:MTR_6g478030|K00695 sucrose synthase [EC:2.4.1.13] | (RefSeq) sucrose synthase	Starch and sucrose metabolism (ko00500)	--	--	TIR domain	Disease resistance protein RPV1 OS=Vitis rotundifolia OX=103349 GN=RPV1 PE=1 SV=1	S	Function unknown	disease resistance-like protein DSC1 [Glycine max]	biological process: cellular process (GO:0009987);; biological process: biological regulation (GO:0065007);; cellular component: membrane (GO:0016020);; cellular component: membrane part (GO:0044425);; molecular function: binding (GO:0005488)
Glycine_max_newGene_7536	0.769861	0.502284	0.59286	2.95818	2.57147	1.59442	3.80962e-24	3.52141	up	--	--	Cellular Component: integral component of membrane (GO:0016021);;	--	--	[L]	Replication, recombination and repair	--	--	L	Replication, recombination and repair	hypothetical protein glysoja_043880, partial [Glycine soja]	cellular component: membrane (GO:0016020);; cellular component: membrane part (GO:0044425)
gene-LOC100794115	0.54344	1.54778	0.887729	0	0	0	1.48196e-07	-6.6283	down	[I]	Lipid transport and metabolism	Molecular Function: phospholipase D activity (GO:0004630);; Molecular Function: calcium ion binding (GO:0005509);; Cellular Component: plasma membrane (GO:0005886);; Biological Process: phospholipid catabolic process (GO:0009395);; Biological Process: phosphatidylcholine metabolic process (GO:0046470);; Molecular Function: N-acylphosphatidylethanolamine-specific phospholipase D activity (GO:00702…	K01115|0.0e+00|gmx:100794115|K01115 phospholipase D1/2 [EC:3.1.4.4] | (RefSeq) phospholipase D alpha 1	Glycerophospholipid metabolism (ko00564);; Ether lipid metabolism (ko00565);; Endocytosis (ko04144)	[I]	Lipid transport and metabolism	Phospholipase D C terminal	Phospholipase D alpha 1 OS=Vigna unguiculata OX=3917 GN=PLD1 PE=2 SV=1	I	Lipid transport and metabolism	phospholipase D alpha 1 [Glycine max]	molecular function: catalytic activity (GO:0003824);; molecular function: binding (GO:0005488);; cellular component: cell (GO:0005623);; cellular component: membrane (GO:0016020);; cellular component: cell part (GO:0044464);; biological process: metabolic process (GO:0008152);; biological process: cellular process (GO:0009987);; biological process: single-organism process (GO:0044699)
gene-LOC100803045	2.61468	3.03133	3.22558	0	0.053145	0	1.58339e-10	-5.1179	down	--	--	Cellular Component: plasma membrane (GO:0005886);;	--	--	--	--	Protein of unknown function (DUF1645)	--	S	Function unknown	uncharacterized protein LOC100803045 [Glycine max]	cellular component: cell (GO:0005623);; cellular component: membrane (GO:0016020);; cellular component: cell part (GO:0044464)
gene-LOC100778990	4.8932	5.39144	4.42419	0.684665	0.429804	0.450369	1.03168e-08	-1.82726	down	--	--	Biological Process: regulation of asymmetric cell division (GO:0009786);;	--	--	--	--	--	--	S	Function unknown	uncharacterized protein LOC100778990 isoform X1 [Glycine max]	biological process: biological regulation (GO:0065007)
gene-MYB70	24.5042	18.966	22.702	43.5858	26.3818	46.3393	8.4384e-27	2.23183	up	--	--	Molecular Function: transcription regulatory region sequence-specific DNA binding (GO:0000976);; Molecular Function: transcription factor activity, sequence-specific DNA binding (GO:0003700);; Molecular Function: transcription cofactor activity (GO:0003712);; Cellular Component: nucleus (GO:0005634);; Biological Process: regulation of transcription, DNA-templated (GO:0006355);; Molecular Function…	K09422|9.9e-152|gmx:778174|K09422 transcription factor MYB, plant | (RefSeq) MYB70; MYB transcription factor MYB70	--	[K]	Transcription	Myb-like DNA-binding domain	Transcription factor MYB44 OS=Arabidopsis thaliana OX=3702 GN=MYB44 PE=1 SV=1	K	Transcription	MYB transcription factor MYB70 [Glycine max]	molecular function: binding (GO:0005488);; molecular function: nucleic acid binding transcription factor activity (GO:0001071);; biological process: biological regulation (GO:0065007);; molecular function: transcription factor activity, protein binding (GO:0000988);; cellular component: cell (GO:0005623);; cellular component: organelle (GO:0043226);; cellular component: cell part (GO:0044464)
Glycine_max_newGene_4482	0.825521	0.830978	1.04953	0.089278	0.054561	0.028249	0.000189524	-2.25871	down	--	--	Molecular Function: beta-galactosidase activity (GO:0004565);; Cellular Component: cell wall (GO:0005618);; Cellular Component: vacuole (GO:0005773);; Biological Process: carbohydrate metabolic process (GO:0005975);; Molecular Function: carbohydrate binding (GO:0030246);;	K00908|2.7e-29|oeu:111380680|K00908 calcium/calmodulin-dependent protein kinase kinase 1 [EC:2.7.11.17] | (RefSeq) serine/threonine-protein kinase GRIK2-like	--	[G]	Carbohydrate transport and metabolism	Galactose binding lectin domain	Beta-galactosidase 8 OS=Arabidopsis thaliana OX=3702 GN=BGAL8 PE=2 SV=2	G	Carbohydrate transport and metabolism	Beta-galactosidase 8, partial [Glycine soja]	molecular function: catalytic activity (GO:0003824);; cellular component: cell (GO:0005623);; cellular component: cell part (GO:0044464);; cellular component: organelle (GO:0043226);; biological process: metabolic process (GO:0008152);; molecular function: binding (GO:0005488)
gene-GMTPS21	6.66216	8.49615	5.13468	0	0	0	8.21858e-15	-8.63897	down	--	--	Molecular Function: magnesium ion binding (GO:0000287);; Molecular Function: terpene synthase activity (GO:0010333);;	K14173|0.0e+00|gmx:100812119|K14173 alpha-farnesene synthase [EC:4.2.3.46] | (RefSeq) GMTPS21; terpene synthase TPS21	Sesquiterpenoid and triterpenoid biosynthesis (ko00909)	--	--	Terpene synthase family, metal binding domain	Alpha-farnesene synthase OS=Ricinus communis OX=3988 GN=TPS7 PE=1 SV=2	S	Function unknown	terpene synthase 21 [Glycine max]	molecular function: binding (GO:0005488);; molecular function: catalytic activity (GO:0003824)
gene-LOC100809773	7.64019	10.0366	7.35372	25.1801	21.2503	17.2632	4.91205e-22	2.77031	up	[O]	Posttranslational modification, protein turnover, chaperones	Molecular Function: ATP binding (GO:0005524);; Molecular Function: 2-alkenal reductase [NAD(P)] activity (GO:0032440);;	K09489|0.0e+00|gmx:100809773|K09489 heat shock 70kDa protein 4 | (RefSeq) HSP70 family protein	--	[O]	Posttranslational modification, protein turnover, chaperones	Hsp70 protein	Heat shock 70 kDa protein 8 OS=Arabidopsis thaliana OX=3702 GN=HSP70-8 PE=1 SV=1	O	Posttranslational modification, protein turnover, chaperones	HSP70 family protein [Glycine max]	molecular function: binding (GO:0005488);; molecular function: catalytic activity (GO:0003824);; biological process: metabolic process (GO:0008152);; biological process: single-organism process (GO:0044699)
gene-LOC102659952	0.374305	0.227145	0.303025	0	0	0	1.44089e-05	-5.75444	down	--	--	--	K14007|2.7e-17|obr:102710266|K14007 protein transport protein SEC24 | (RefSeq) protein transport protein Sec24-like At3g07100	Protein processing in endoplasmic reticulum (ko04141)	--	--	Protein of unknown function (DUF 659)	--	S	Function unknown	uncharacterized protein LOC102659952 isoform X1 [Glycine max]	--
gene-LOC100806754	12.808	20.3766	14.6098	0.39888	0.479354	0.479045	1.55409e-24	-3.61653	down	[M]	Cell wall/membrane/envelope biogenesis	Cellular Component: Golgi apparatus (GO:0005794);; Molecular Function: transferase activity, transferring glycosyl groups (GO:0016757);;	K20893|1.0e-204|gmx:100806754|K20893 probable galacturonosyltransferase-like 1 [EC:2.4.1.-] | (RefSeq) probable galacturonosyltransferase-like 1	--	--	--	Glycosyl transferase family 8	Probable galacturonosyltransferase-like 1 OS=Arabidopsis thaliana OX=3702 GN=GATL1 PE=2 SV=1	G	Carbohydrate transport and metabolism	probable galacturonosyltransferase-like 1 [Glycine max]	cellular component: cell (GO:0005623);; cellular component: organelle (GO:0043226);; cellular component: cell part (GO:0044464);; molecular function: catalytic activity (GO:0003824)
gene-LOC100810127	4.57799	3.65784	4.31361	2.9309	2.83798	3.6147	3.11888e-05	1.03342	up	[H]	Coenzyme transport and metabolism	Molecular Function: uroporphyrin-III C-methyltransferase activity (GO:0004851);; Biological Process: siroheme biosynthetic process (GO:0019354);; Biological Process: methylation (GO:0032259);; Biological Process: oxidation-reduction process (GO:0055114);;	K02303|3.2e-206|gmx:100810127|K02303 uroporphyrin-III C-methyltransferase [EC:2.1.1.107] | (RefSeq) uroporphyrinogen-III C-methyltransferase	Porphyrin and chlorophyll metabolism (ko00860)	[H]	Coenzyme transport and metabolism	Tetrapyrrole (Corrin/Porphyrin) Methylases	S-adenosyl-L-methionine-dependent uroporphyrinogen III methyltransferase, chloroplastic OS=Arabidopsis thaliana OX=3702 GN=UPM1 PE=1 SV=1	H	Coenzyme transport and metabolism	uroporphyrinogen-III C-methyltransferase [Glycine max]	molecular function: catalytic activity (GO:0003824);; biological process: metabolic process (GO:0008152);; biological process: cellular process (GO:0009987);; biological process: single-organism process (GO:0044699)
gene-LOC102667346	0.110627	0.10501	0.128753	1.02502	0.502714	0.395224	1.7293e-11	3.71894	up	--	--	Cellular Component: small-subunit processome (GO:0032040);;	K14566|4.8e-07|lang:109340395|K14566 U3 small nucleolar RNA-associated protein 24 | (RefSeq) rRNA-processing protein FCF1 homolog	Ribosome biogenesis in eukaryotes (ko03008)	[R]	General function prediction only	Fcf1	--	--	--	uncharacterized protein LOC102667346 isoform X3 [Glycine max]	cellular component: cell (GO:0005623);; cellular component: macromolecular complex (GO:0032991);; cellular component: cell part (GO:0044464)
gene-LOC100527489	6.93219	5.40633	7.10938	7.1471	6.79038	4.96515	2.80369e-05	1.42326	up	[K]	Transcription	Molecular Function: nucleic acid binding (GO:0003676);; Molecular Function: DNA-directed 5'-3' RNA polymerase activity (GO:0003899);; Cellular Component: DNA-directed RNA polymerase I complex (GO:0005736);; Biological Process: termination of RNA polymerase I transcription (GO:0006363);; Biological Process: mRNA cleavage (GO:0006379);; Molecular Function: zinc ion binding (GO:0008270);;	K03000|2.2e-63|gmx:100527489|K03000 DNA-directed RNA polymerase I subunit RPA12 | (RefSeq) uncharacterized protein LOC100527489	RNA polymerase (ko03020)	[K]	Transcription	Transcription factor S-II (TFIIS)	--	K	Transcription	uncharacterized protein LOC100527489 [Glycine max]	molecular function: binding (GO:0005488);; molecular function: catalytic activity (GO:0003824);; cellular component: cell (GO:0005623);; cellular component: membrane-enclosed lumen (GO:0031974);; cellular component: macromolecular complex (GO:0032991);; cellular component: organelle (GO:0043226);; cellular component: organelle part (GO:0044422);; cellular component: cell part (GO:0044464);; biolo…
gene-LOC100819895	6.73367	6.11686	7.27379	5.23946	6.01769	3.56646	0.00192373	1.07544	up	--	--	Biological Process: intracellular protein transport (GO:0006886);; Biological Process: vesicle-mediated transport (GO:0016192);;	K20177|0.0e+00|gmx:100819895|K20177 vacuolar protein sorting-associated protein 3 | (RefSeq) vacuolar sorting protein 3 isoform X1	--	[U]	Intracellular trafficking, secretion, and vesicular transport	Vacuolar sorting protein 39 domain 2	Vacuolar sorting protein 3 OS=Arabidopsis thaliana OX=3702 GN=VPS3 PE=1 SV=2	U	Intracellular trafficking, secretion, and vesicular transport	vacuolar sorting protein 3 isoform X1 [Glycine max]	biological process: localization (GO:0051179)
gene-LOC100790610	7.97156	4.38287	7.27646	0	0	0	3.17042e-13	-8.25727	down	--	--	Molecular Function: aspartic-type endopeptidase activity (GO:0004190);; Cellular Component: extracellular region (GO:0005576);; Biological Process: proteolysis (GO:0006508);; Biological Process: protein catabolic process (GO:0030163);;	K01381|1.9e-99|nau:109218643|K01381 saccharopepsin [EC:3.4.23.25] | (RefSeq) aspartic proteinase CDR1-like	--	[O]	Posttranslational modification, protein turnover, chaperones	Xylanase inhibitor N-terminal	Aspartic proteinase CDR1 OS=Arabidopsis thaliana OX=3702 GN=CDR1 PE=1 SV=1	O	Posttranslational modification, protein turnover, chaperones	aspartic proteinase CDR1 [Glycine max]	molecular function: catalytic activity (GO:0003824);; biological process: metabolic process (GO:0008152);; cellular component: extracellular region (GO:0005576)
gene-LOC100812400	9.94752	4.64658	8.77327	0.148781	0.084938	0.136957	1.85246e-24	-4.35732	down	--	--	--	K18643|9.4e-47|gra:105795008|K18643 katanin p80 WD40 repeat-containing subunit B1 | (RefSeq) uncharacterized LOC105795008	--	--	--	Protein of unknown function (DUF789)	--	S	Function unknown	uncharacterized protein LOC100812400 [Glycine max]	--
gene-LOC100813311	11.2526	15.6824	9.99013	0.352549	0	0.412806	3.06297e-09	-4.02492	down	--	--	Cellular Component: integral component of membrane (GO:0016021);;	K10664|8.6e-42|vvi:100854068|K10664 E3 ubiquitin-protein ligase ATL6/9/15/31/42/55 [EC:2.3.2.27] | (RefSeq) RING-H2 finger protein ATL54	--	[O]	Posttranslational modification, protein turnover, chaperones	Ring finger domain	RING-H2 finger protein ATL54 OS=Arabidopsis thaliana OX=3702 GN=ATL54 PE=2 SV=2	O	Posttranslational modification, protein turnover, chaperones	RING-H2 finger protein ATL54 [Glycine max]	cellular component: membrane (GO:0016020);; cellular component: membrane part (GO:0044425)
gene-LOC100813490	0.987518	1.00294	0.80108	1.82081	1.34521	4.34543	3.57476e-09	2.75995	up	[G]	Carbohydrate transport and metabolism	Molecular Function: alpha-amylase activity (GO:0004556);; Molecular Function: calcium ion binding (GO:0005509);; Biological Process: carbohydrate metabolic process (GO:0005975);; Molecular Function: alpha-amylase activity (releasing maltohexaose) (GO:0103025);;	K01176|4.6e-257|gmx:100813490|K01176 alpha-amylase [EC:3.2.1.1] | (RefSeq) uncharacterized protein LOC100813490	Starch and sucrose metabolism (ko00500)	[G]	Carbohydrate transport and metabolism	Alpha-amylase C-terminal beta-sheet domain	Probable alpha-amylase 2 OS=Arabidopsis thaliana OX=3702 GN=AMY2 PE=2 SV=1	G	Carbohydrate transport and metabolism	uncharacterized protein LOC100813490 [Glycine max]	molecular function: catalytic activity (GO:0003824);; molecular function: binding (GO:0005488);; biological process: metabolic process (GO:0008152)
gene-LOC100801143	27.5597	31.3757	26.5201	2.15572	2.28821	3.17298	1.72e-14	-2.01561	down	[Q]	Secondary metabolites biosynthesis, transport and catabolism	Molecular Function: ligase activity (GO:0016874);;	K01904|1.8e-210|ccaj:109788437|K01904 4-coumarate--CoA ligase [EC:6.2.1.12] | (RefSeq) 4-coumarate--CoA ligase-like 9	Ubiquinone and other terpenoid-quinone biosynthesis (ko00130);; Phenylpropanoid biosynthesis (ko00940)	[I]	Lipid transport and metabolism	AMP-binding enzyme	4-coumarate--CoA ligase-like 9 OS=Arabidopsis thaliana OX=3702 GN=4CLL9 PE=1 SV=2	I	Lipid transport and metabolism	4-coumarate--CoA ligase-like 9 isoform X2 [Glycine max]	molecular function: catalytic activity (GO:0003824)
gene-LOC100801988	5.83533	4.88001	8.5398	0.972477	0.548916	1.09766	5.73469e-05	-1.40587	down	--	--	Cellular Component: host cell nucleus (GO:0042025);;	K06627|9.5e-199|gmx:100801988|K06627 cyclin-A | (RefSeq) putative cyclin-A3-1 isoform X2	--	[D]	Cell cycle control, cell division, chromosome partitioning	Cyclin, N-terminal domain	Putative cyclin-A3-1 OS=Arabidopsis thaliana OX=3702 GN=CYCA3-1 PE=3 SV=1	D	Cell cycle control, cell division, chromosome partitioning	putative cyclin-A3-1 isoform X1 [Glycine max]	cellular component: other organism (GO:0044215);; cellular component: other organism part (GO:0044217)
gene-LOC100790826	1.04856	1.83306	1.25192	0	0	0	3.43968e-09	-7.14797	down	[J]	Translation, ribosomal structure and biogenesis	Molecular Function: translation elongation factor activity (GO:0003746);; Molecular Function: GTPase activity (GO:0003924);; Molecular Function: GTP binding (GO:0005525);; Biological Process: translational elongation (GO:0006414);; Molecular Function: ribosome binding (GO:0043022);; Cellular Component: ribonucleoprotein complex (GO:1990904);;	K03234|0.0e+00|gmx:100790826|K03234 elongation factor 2 | (RefSeq) elongation factor 2 isoform X1	--	[J]	Translation, ribosomal structure and biogenesis	Elongation factor Tu GTP binding domain	Elongation factor 2 OS=Beta vulgaris OX=161934 PE=2 SV=1	J	Translation, ribosomal structure and biogenesis	elongation factor 2 isoform X2 [Glycine max]	molecular function: binding (GO:0005488);; biological process: metabolic process (GO:0008152);; biological process: cellular process (GO:0009987);; molecular function: catalytic activity (GO:0003824);; cellular component: macromolecular complex (GO:0032991)
gene-LOC100818247	3.38808	2.96154	2.90215	0.168145	0.267008	0.250077	8.32688e-07	-2.10253	down	--	--	Cellular Component: cellular_component (GO:0005575);; Cellular Component: cell-cell junction (GO:0005911);; Cellular Component: plasmodesma (GO:0009506);; Cellular Component: cell junction (GO:0030054);; Cellular Component: symplast (GO:0055044);;	--	--	--	--	--	F-box protein At1g10780 OS=Arabidopsis thaliana OX=3702 GN=At1g10780 PE=2 SV=1	S	Function unknown	F-box protein At1g10780-like [Glycine max]	cellular component: cell junction (GO:0030054);; cellular component: symplast (GO:0055044)
gene-LOC100808286	54.2618	71.2535	56.9502	6.5319	4.92936	9.85886	1.86395e-08	-1.65936	down	[F]	Nucleotide transport and metabolism	Molecular Function: GMP synthase (glutamine-hydrolyzing) activity (GO:0003922);; Biological Process: glutamine metabolic process (GO:0006541);; Molecular Function: transferase activity (GO:0016740);;	K22314|2.7e-140|gmx:100808286|K22314 glucosinolate gamma-glutamyl hydrolase [EC:3.4.19.16] | (RefSeq) uncharacterized protein LOC100808286	--	[F]	Nucleotide transport and metabolism	Glutamine amidotransferase class-I	Gamma-glutamyl peptidase 5 OS=Arabidopsis thaliana OX=3702 GN=GGP5 PE=2 SV=1	F	Nucleotide transport and metabolism	gamma-glutamyl peptidase 5-like [Glycine max]	molecular function: catalytic activity (GO:0003824);; biological process: metabolic process (GO:0008152);; biological process: cellular process (GO:0009987);; biological process: single-organism process (GO:0044699)
gene-LOC100796289	59.3079	47.9549	58.1176	4.71129	3.73959	2.79944	5.49173e-18	-2.38726	down	--	--	Biological Process: metal ion transport (GO:0030001);; Molecular Function: metal ion binding (GO:0046872);;	--	--	[P]	Inorganic ion transport and metabolism	Heavy-metal-associated domain	Heavy metal-associated isoprenylated plant protein 7 OS=Arabidopsis thaliana OX=3702 GN=HIPP07 PE=1 SV=1	P	Inorganic ion transport and metabolism	heavy metal-associated isoprenylated plant protein 7 [Glycine max]	biological process: localization (GO:0051179);; molecular function: binding (GO:0005488)
gene-LOC100786819	8.05833	6.99925	7.52093	1.03812	0.725666	1.11282	1.14357e-08	-1.50573	down	--	--	Molecular Function: DNA binding (GO:0003677);; Molecular Function: transcription factor activity, sequence-specific DNA binding (GO:0003700);; Cellular Component: nucleus (GO:0005634);;	--	--	--	--	AP2 domain	Ethylene-responsive transcription factor-like protein At4g13040 OS=Arabidopsis thaliana OX=3702 GN=At4g13040 PE=2 SV=2	K	Transcription	ethylene-responsive transcription factor-like protein At4g13040 isoform X1 [Glycine max]	molecular function: binding (GO:0005488);; molecular function: nucleic acid binding transcription factor activity (GO:0001071);; biological process: biological regulation (GO:0065007);; cellular component: cell (GO:0005623);; cellular component: organelle (GO:0043226);; cellular component: cell part (GO:0044464)
gene-LOC100818534	3.95432	4.34705	3.44543	3.61179	4.21994	3.53702	3.37113e-06	1.41889	up	[U]	Intracellular trafficking, secretion, and vesicular transport	Molecular Function: protein kinase activity (GO:0004672);; Molecular Function: ATP binding (GO:0005524);; Cellular Component: integral component of membrane (GO:0016021);;	K13429|1.8e-61|nau:109245049|K13429 chitin elicitor receptor kinase 1 | (RefSeq) lysM domain receptor-like kinase 3	Plant-pathogen interaction (ko04626)	--	--	Protein kinase domain	Protein LYK5 OS=Arabidopsis thaliana OX=3702 GN=LYK5 PE=2 SV=1	T	Signal transduction mechanisms	LOW QUALITY PROTEIN: protein LYK5-like [Glycine max]	molecular function: catalytic activity (GO:0003824);; biological process: metabolic process (GO:0008152);; biological process: cellular process (GO:0009987);; molecular function: binding (GO:0005488);; cellular component: membrane (GO:0016020);; cellular component: membrane part (GO:0044425)
gene-LOC100796408	4.43781	5.80406	4.98062	0	0	0	3.81541e-10	-7.41639	down	--	--	--	--	--	[R]	General function prediction only	--	--	S	Function unknown	uncharacterized protein LOC100796408 [Glycine max]	--
gene-LOC100781644	93.2138	113.883	95.5727	11.5826	4.88108	12.1071	1.20542e-10	-1.98963	down	[S]	Function unknown	Biological Process: allantoin metabolic process (GO:0000255);; Biological Process: allantoin catabolic process (GO:0000256);; Molecular Function: molecular_function (GO:0003674);; Molecular Function: transcription factor activity, sequence-specific DNA binding (GO:0003700);; Molecular Function: catalytic activity (GO:0003824);; Biological Process: nucleobase-containing compound metabolic process …	K14977|1.2e-171|gmx:100781644|K14977 (S)-ureidoglycine aminohydrolase [EC:3.5.3.26] | (RefSeq) (S)-ureidoglycine aminohydrolase	Purine metabolism (ko00230)	--	--	Cupin domain	(S)-ureidoglycine aminohydrolase OS=Arabidopsis thaliana OX=3702 GN=UGLYAH PE=1 SV=1	S	Function unknown	(S)-ureidoglycine aminohydrolase [Glycine max]	biological process: metabolic process (GO:0008152);; biological process: cellular process (GO:0009987);; molecular function: nucleic acid binding transcription factor activity (GO:0001071);; biological process: biological regulation (GO:0065007);; molecular function: catalytic activity (GO:0003824);; biological process: single-organism process (GO:0044699)
gene-LOC100775179	17.1325	22.2589	18.0904	1.02169	1.5893	1.32221	3.66713e-12	-2.34537	down	--	--	Molecular Function: methyltransferase activity (GO:0008168);; Cellular Component: integral component of membrane (GO:0016021);; Biological Process: methylation (GO:0032259);;	K15449|1.7e-165|gmx:100791920|K15449 tRNA wybutosine-synthesizing protein 1 [EC:4.1.3.44] | (RefSeq) probable methyltransferase PMT28	--	--	--	Putative S-adenosyl-L-methionine-dependent methyltransferase	Probable methyltransferase PMT26 OS=Arabidopsis thaliana OX=3702 GN=At5g64030 PE=2 SV=1	S	Function unknown	probable methyltransferase PMT26 [Glycine max]	molecular function: catalytic activity (GO:0003824);; cellular component: membrane (GO:0016020);; cellular component: membrane part (GO:0044425);; biological process: metabolic process (GO:0008152)
gene-LOC100797432	3.24124	1.7613	3.19278	10.5743	5.54807	8.19548	1.43025e-21	2.97149	up	--	--	Molecular Function: metal ion binding (GO:0046872);;	K16275|2.7e-188|gmx:100797432|K16275 E3 ubiquitin-protein ligase BAH [EC:2.3.2.27] | (RefSeq) E3 ubiquitin-protein ligase BAH1	--	--	--	RING-type zinc-finger	E3 ubiquitin-protein ligase BAH1 OS=Arabidopsis thaliana OX=3702 GN=BAH1 PE=1 SV=1	O	Posttranslational modification, protein turnover, chaperones	E3 ubiquitin-protein ligase BAH1 isoform A [Glycine soja]	molecular function: binding (GO:0005488)
gene-LOC100306573	9.88552	8.95754	9.67072	2.52963	0.705498	1.66183	0.00498202	-1.11267	down	--	--	--	--	--	--	--	Protein of unknown function (DUF4050)	--	S	Function unknown	uncharacterized protein LOC100306573 [Glycine max]	--
gene-GMNF-YC03	23.3999	24.1759	24.1956	3.19751	3.75749	4.48214	1.57547e-05	-1.17194	down	--	--	Cellular Component: nucleus (GO:0005634);; Molecular Function: protein heterodimerization activity (GO:0046982);;	K08066|5.1e-53|han:110903714|K08066 nuclear transcription factor Y, gamma | (RefSeq) nuclear transcription factor Y subunit C-9	--	[K]	Transcription	Histone-like transcription factor (CBF/NF-Y) and archaeal histone	Nuclear transcription factor Y subunit C-1 OS=Arabidopsis thaliana OX=3702 GN=NFYC1 PE=1 SV=1	K	Transcription	nuclear factor Y transcription factor family protein [Glycine max]	cellular component: cell (GO:0005623);; cellular component: organelle (GO:0043226);; cellular component: cell part (GO:0044464);; molecular function: binding (GO:0005488)
gene-LOC100819858	29.5316	23.5887	32.0078	4.5611	2.44142	5.05807	4.25611e-07	-1.37918	down	--	--	Cellular Component: mitochondrial outer membrane translocase complex (GO:0005742);; Cellular Component: integral component of membrane (GO:0016021);; Biological Process: protein import into mitochondrial outer membrane (GO:0045040);;	--	--	--	--	Plant specific mitochondrial import receptor subunit TOM20	Mitochondrial import receptor subunit TOM20 OS=Solanum tuberosum OX=4113 GN=TOM20 PE=1 SV=1	U	Intracellular trafficking, secretion, and vesicular transport	uncharacterized protein LOC100819858 [Glycine max]	cellular component: cell (GO:0005623);; cellular component: membrane (GO:0016020);; cellular component: macromolecular complex (GO:0032991);; cellular component: organelle (GO:0043226);; cellular component: organelle part (GO:0044422);; cellular component: membrane part (GO:0044425);; cellular component: cell part (GO:0044464);; biological process: cellular process (GO:0009987);; biological proce…
gene-LOC100779591	3.87237	2.15131	3.97065	0.3381	0.420522	0.188813	0.000403453	-1.87809	down	[M]	Cell wall/membrane/envelope biogenesis	Molecular Function: protein kinase activity (GO:0004672);; Molecular Function: ATP binding (GO:0005524);; Cellular Component: integral component of membrane (GO:0016021);;	K13416|2.8e-41|nta:107767522|K13416 brassinosteroid insensitive 1-associated receptor kinase 1 [EC:2.7.10.1 2.7.11.1] | (RefSeq) BRASSINOSTEROID INSENSITIVE 1-associated receptor kinase 1-like	MAPK signaling pathway - plant (ko04016);; Plant hormone signal transduction (ko04075);; Plant-pathogen interaction (ko04626)	--	--	Protein tyrosine and serine/threonine kinase	BRASSINOSTEROID INSENSITIVE 1-associated receptor kinase 1 OS=Arabidopsis thaliana OX=3702 GN=BAK1 PE=1 SV=2	T	Signal transduction mechanisms	protein NSP-INTERACTING KINASE 2 isoform X1 [Glycine max]	molecular function: catalytic activity (GO:0003824);; biological process: metabolic process (GO:0008152);; biological process: cellular process (GO:0009987);; molecular function: binding (GO:0005488);; cellular component: membrane (GO:0016020);; cellular component: membrane part (GO:0044425)
gene-LOC100787349	7.10524	13.543	8.43217	0.470285	0.52317	0.660208	7.57122e-12	-2.64456	down	[P]	Inorganic ion transport and metabolism	Molecular Function: inorganic phosphate transmembrane transporter activity (GO:0005315);; Biological Process: phosphate ion transport (GO:0006817);; Cellular Component: integral component of membrane (GO:0016021);;	K14640|0.0e+00|gmx:100787349|K14640 solute carrier family 20 (sodium-dependent phosphate transporter) | (RefSeq) inorganic phosphate transporter 2-1, chloroplastic	--	[P]	Inorganic ion transport and metabolism	Phosphate transporter family	Inorganic phosphate transporter 2-1, chloroplastic OS=Arabidopsis thaliana OX=3702 GN=PHT2-1 PE=1 SV=1	P	Inorganic ion transport and metabolism	inorganic phosphate transporter 2-1, chloroplastic [Glycine max]	molecular function: transporter activity (GO:0005215);; biological process: localization (GO:0051179);; cellular component: membrane (GO:0016020);; cellular component: membrane part (GO:0044425)
gene-LOC100776854	3.98534	3.38499	4.60145	3.7417	4.07124	2.78139	7.42411e-05	1.30306	up	[T]	Signal transduction mechanisms	Cellular Component: cyclin-dependent protein kinase holoenzyme complex (GO:0000307);; Cellular Component: nuclear chromatin (GO:0000790);; Molecular Function: cyclin-dependent protein serine/threonine kinase activity (GO:0004693);; Molecular Function: ATP binding (GO:0005524);; Cellular Component: nucleus (GO:0005634);; Biological Process: protein phosphorylation (GO:0006468);; Molecular Function…	K08819|0.0e+00|gmx:100776854|K08819 cyclin-dependent kinase 12/13 [EC:2.7.11.22 2.7.11.23] | (RefSeq) probable serine/threonine-protein kinase At1g54610	--	[D]	Cell cycle control, cell division, chromosome partitioning	Protein kinase domain	Probable serine/threonine-protein kinase At1g54610 OS=Arabidopsis thaliana OX=3702 GN=At1g54610 PE=1 SV=1	T	Signal transduction mechanisms	probable serine/threonine-protein kinase At1g54610 [Glycine max]	cellular component: cell (GO:0005623);; cellular component: macromolecular complex (GO:0032991);; cellular component: cell part (GO:0044464);; cellular component: membrane-enclosed lumen (GO:0031974);; cellular component: organelle (GO:0043226);; cellular component: organelle part (GO:0044422);; molecular function: catalytic activity (GO:0003824);; biological process: metabolic process (GO:000815…
gene-LOC112997745	0.953368	0.681987	1.06167	1.11082	0.738274	0.532129	0.00908321	1.25226	up	--	--	Cellular Component: integral component of membrane (GO:0016021);;	K15121|8.6e-190|gmx:112997745|K15121 solute carrier family 25, member 44 | (RefSeq) solute carrier family 25 member 44-like	--	[C]	Energy production and conversion	Mitochondrial carrier protein	Adenine nucleotide transporter BT1, chloroplastic/mitochondrial OS=Arabidopsis thaliana OX=3702 GN=BT1 PE=1 SV=1	C	Energy production and conversion	solute carrier family 25 member 44-like [Glycine max]	cellular component: membrane (GO:0016020);; cellular component: membrane part (GO:0044425)
gene-LOC100816677	2.99728	2.0873	3.19488	2.49913	2.20107	1.79927	0.000273459	1.11744	up	--	--	Molecular Function: molecular_function (GO:0003674);; Molecular Function: nucleic acid binding (GO:0003676);; Molecular Function: RNA binding (GO:0003723);; Molecular Function: catalytic activity (GO:0003824);; Molecular Function: nuclease activity (GO:0004518);; Molecular Function: endonuclease activity (GO:0004519);; Molecular Function: binding (GO:0005488);; Cellular Component: cellular_compon…	--	--	[R]	General function prediction only	PPR repeat family	Pentatricopeptide repeat-containing protein At5g01110 OS=Arabidopsis thaliana OX=3702 GN=At5g01110 PE=2 SV=1	S	Function unknown	hypothetical protein GLYMA_14G034400 [Glycine max]	molecular function: binding (GO:0005488);; molecular function: catalytic activity (GO:0003824);; biological process: metabolic process (GO:0008152);; biological process: cellular process (GO:0009987);; cellular component: cell (GO:0005623);; cellular component: cell part (GO:0044464);; cellular component: organelle (GO:0043226)
gene-LOC100526916	2.99766	4.92307	3.93645	0	0	0	3.48091e-07	-6.44262	down	--	--	Biological Process: defense response to bacterium (GO:0042742);; Biological Process: defense response to fungus (GO:0050832);;	--	--	[R]	General function prediction only	Barwin family	Pathogenesis-related protein PR-4B OS=Nicotiana tabacum OX=4097 PE=2 SV=1	S	Function unknown	uncharacterized protein LOC100526916 precursor [Glycine max]	biological process: response to stimulus (GO:0050896);; biological process: multi-organism process (GO:0051704)
gene-LOC100815170	3.39285	4.86142	3.92911	0.149062	0.192639	0.550072	1.33711e-05	-2.25862	down	--	--	Biological Process: ubiquitin-dependent protein catabolic process (GO:0006511);; Cellular Component: SCF ubiquitin ligase complex (GO:0019005);; Biological Process: SCF-dependent proteasomal ubiquitin-dependent protein catabolic process (GO:0031146);;	K10268|2.1e-08|cam:101493919|K10268 F-box and leucine-rich repeat protein 2/20 | (RefSeq) uncharacterized LOC101493919	--	--	--	F-box-like	F-box/LRR-repeat protein 17 OS=Arabidopsis thaliana OX=3702 GN=FBL17 PE=1 SV=1	S	Function unknown	F-box/LRR-repeat protein 17 [Glycine max]	biological process: metabolic process (GO:0008152);; biological process: cellular process (GO:0009987);; cellular component: cell (GO:0005623);; cellular component: macromolecular complex (GO:0032991);; cellular component: cell part (GO:0044464)
gene-LOC100817516	5.78525	3.22253	5.13184	7.40672	9.24066	5.67899	7.66991e-09	2.13481	up	--	--	Molecular Function: ion channel activity (GO:0005216);; Cellular Component: integral component of membrane (GO:0016021);;	K05391|0.0e+00|gmx:100817516|K05391 cyclic nucleotide gated channel, plant | (RefSeq) cyclic nucleotide-gated ion channel 1	Plant-pathogen interaction (ko04626)	[PT]	Inorganic ion transport and metabolism;; Signal transduction mechanisms	Ion transport protein	Cyclic nucleotide-gated ion channel 1 OS=Arabidopsis thaliana OX=3702 GN=CNGC1 PE=1 SV=1	--	--	cyclic nucleotide-gated ion channel 1 [Glycine max]	molecular function: transporter activity (GO:0005215);; biological process: localization (GO:0051179);; cellular component: membrane (GO:0016020);; cellular component: membrane part (GO:0044425)
gene-LOC100808948	39.8155	186.108	39.0609	0.299729	0.216466	0.49238	3.88181e-25	-6.35029	down	[DPM]	Cell cycle control, cell division, chromosome partitioning;; Inorganic ion transport and metabolism;; Cell wall/membrane/envelope biogenesis	Molecular Function: ferroxidase activity (GO:0004322);; Molecular Function: copper ion binding (GO:0005507);; Cellular Component: plasma membrane (GO:0005886);; Biological Process: iron ion transport (GO:0006826);; Biological Process: lignin catabolic process (GO:0046274);; Cellular Component: apoplast (GO:0048046);; Molecular Function: hydroquinone:oxygen oxidoreductase activity (GO:0052716);; B…	K05909|0.0e+00|gmx:100808948|K05909 laccase [EC:1.10.3.2] | (RefSeq) laccase-12	--	[Q]	Secondary metabolites biosynthesis, transport and catabolism	Multicopper oxidase	Laccase-5 OS=Arabidopsis thaliana OX=3702 GN=LAC5 PE=2 SV=1	Q	Secondary metabolites biosynthesis, transport and catabolism	laccase-12 [Glycine max]	molecular function: catalytic activity (GO:0003824);; biological process: metabolic process (GO:0008152);; biological process: single-organism process (GO:0044699);; molecular function: binding (GO:0005488);; cellular component: cell (GO:0005623);; cellular component: membrane (GO:0016020);; cellular component: cell part (GO:0044464);; biological process: localization (GO:0051179);; biological pr…
gene-DGAT1A	10.5989	9.74357	9.5975	20.8923	19.9316	18.6176	5.33709e-29	2.44505	up	--	--	Molecular Function: diacylglycerol O-acyltransferase activity (GO:0004144);; Cellular Component: endoplasmic reticulum membrane (GO:0005789);; Cellular Component: integral component of membrane (GO:0016021);; Biological Process: triglyceride biosynthetic process (GO:0019432);;	K11155|6.5e-290|gmx:548005|K11155 diacylglycerol O-acyltransferase 1 [EC:2.3.1.20 2.3.1.75 2.3.1.76] | (RefSeq) DGAT1A; diacylglycerol O-acyltransferase 1A isoform 1	Glycerolipid metabolism (ko00561)	[I]	Lipid transport and metabolism	MBOAT, membrane-bound O-acyltransferase family	Diacylglycerol O-acyltransferase 1A OS=Glycine max OX=3847 GN=DGAT1A PE=1 SV=1	I	Lipid transport and metabolism	diacylglycerol O-acyltransferase 1A isoform 2 [Glycine max]	molecular function: catalytic activity (GO:0003824);; cellular component: cell (GO:0005623);; cellular component: membrane (GO:0016020);; cellular component: organelle (GO:0043226);; cellular component: organelle part (GO:0044422);; cellular component: membrane part (GO:0044425);; cellular component: cell part (GO:0044464);; biological process: metabolic process (GO:0008152);; biological process:…
gene-LOC100778704	16.5391	16.3374	15.1039	28.4947	15.7568	19.5585	4.37492e-15	1.82765	up	[P]	Inorganic ion transport and metabolism	Molecular Function: gamma-glutamylcyclotransferase activity (GO:0003839);; Molecular Function: hydrolase activity, hydrolyzing O-glycosyl compounds (GO:0004553);; Biological Process: carbohydrate metabolic process (GO:0005975);; Biological Process: glutathione catabolic process (GO:0006751);; Molecular Function: transferase activity (GO:0016740);;	K22596|2.8e-131|gmx:100778704|K22596 gamma-glutamylcyclotransferase, plant [EC:4.3.2.9] | (RefSeq) uncharacterized protein LOC100778704	Glutathione metabolism (ko00480)	[P]	Inorganic ion transport and metabolism	ChaC-like protein	Gamma-glutamylcyclotransferase 2-2 OS=Arabidopsis thaliana OX=3702 GN=GGCT2;2 PE=1 SV=1	P	Inorganic ion transport and metabolism	gamma-glutamylcyclotransferase 2-1-like [Glycine soja]	molecular function: catalytic activity (GO:0003824);; biological process: metabolic process (GO:0008152);; biological process: cellular process (GO:0009987)
gene-LOC100785182	13.9783	29.5306	15.9604	0.259874	0.237705	0.309082	3.74301e-27	-4.62379	down	--	--	Cellular Component: integral component of membrane (GO:0016021);; Biological Process: transmembrane transport (GO:0055085);;	K24139|1.0e-227|gmx:100785182|K24139 auxin efflux carrier family protein | (RefSeq) protein PIN-LIKES 3	--	[S]	Function unknown	Membrane transport protein	Protein PIN-LIKES 3 OS=Arabidopsis thaliana OX=3702 GN=PILS3 PE=2 SV=1	S	Function unknown	protein PIN-LIKES 3 [Glycine max]	cellular component: membrane (GO:0016020);; cellular component: membrane part (GO:0044425);; biological process: localization (GO:0051179)
gene-LOC100790964	1.19217	0.868138	1.32433	0	0	0	2.56417e-07	-6.47996	down	--		Molecular Function: protein kinase activity (GO:0004672);; Molecular Function: ATP binding (GO:0005524);; Cellular Component: integral component of membrane (GO:0016021);;	K13416|3.4e-46|aip:107631617|K13416 brassinosteroid insensitive 1-associated receptor kinase 1 [EC:2.7.10.1 2.7.11.1] | (RefSeq) BRASSINOSTEROID INSENSITIVE 1-associated receptor kinase 1 isoform X1	MAPK signaling pathway - plant (ko04016);; Plant hormone signal transduction (ko04075);; Plant-pathogen interaction (ko04626)	[T]	Signal transduction mechanisms	Protein tyrosine and serine/threonine kinase	Rust resistance kinase Lr10 OS=Triticum aestivum OX=4565 GN=LRK10 PE=2 SV=1	T	Signal transduction mechanisms	rust resistance kinase Lr10 [Glycine max]	molecular function: catalytic activity (GO:0003824);; biological process: metabolic process (GO:0008152);; biological process: cellular process (GO:0009987);; molecular function: binding (GO:0005488);; cellular component: membrane (GO:0016020);; cellular component: membrane part (GO:0044425)
gene-LOC100798061	12.5084	8.60675	11.9588	1.07706	1.07354	0.967663	2.51686e-12	-1.91288	down	[L]	Replication, recombination and repair	Molecular Function: DNA binding (GO:0003677);; Molecular Function: chromatin binding (GO:0003682);; Molecular Function: DNA (cytosine-5-)-methyltransferase activity (GO:0003886);; Cellular Component: nucleus (GO:0005634);; Biological Process: maintenance of DNA methylation (GO:0010216);; Biological Process: DNA methylation on cytosine within a CG sequence (GO:0010424);;	K00558|0.0e+00|gmx:100798061|K00558 DNA (cytosine-5)-methyltransferase 1 [EC:2.1.1.37] | (RefSeq) putative DNA (cytosine-5)-methyltransferase CMT1	Cysteine and methionine metabolism (ko00270)	--	--	C-5 cytosine-specific DNA methylase	DNA (cytosine-5)-methyltransferase CMT3 OS=Oryza sativa subsp. japonica OX=39947 GN=CMT3 PE=2 SV=1	B	Chromatin structure and dynamics	putative DNA (cytosine-5)-methyltransferase CMT1 [Glycine max]	molecular function: binding (GO:0005488);; molecular function: catalytic activity (GO:0003824);; biological process: metabolic process (GO:0008152);; biological process: cellular process (GO:0009987);; cellular component: cell (GO:0005623);; cellular component: organelle (GO:0043226);; cellular component: cell part (GO:0044464)
gene-LOC100789576	5.96516	9.61398	7.37011	0	0	0	1.03689e-09	-7.30171	down	--	--	--	K03860|4.4e-07|nnu:104608881|K03860 phosphatidylinositol N-acetylglucosaminyltransferase subunit Q | (RefSeq) N-acetylglucosaminyl-phosphatidylinositol biosynthetic protein gpi1-like	Glycosylphosphatidylinositol (GPI)-anchor biosynthesis (ko00563)	--	--	Gibberellin regulated protein	Snakin-2 OS=Solanum tuberosum OX=4113 GN=SN2 PE=1 SV=1	S	Function unknown	snakin-2 [Glycine max]	--
gene-LOC100814336	0.365282	0.300126	0.590007	0.792603	0.825064	0.594361	2.24719e-08	2.26807	up	--		Molecular Function: protein kinase activity (GO:0004672);; Molecular Function: ATP binding (GO:0005524);; Cellular Component: integral component of membrane (GO:0016021);;	K13430|3.5e-28|rcu:8260762|K13430 serine/threonine-protein kinase PBS1 [EC:2.7.11.1] | (RefSeq) probable serine/threonine-protein kinase PBL7 isoform X2	Plant-pathogen interaction (ko04626)	[T]	Signal transduction mechanisms	Protein kinase domain	Receptor-like serine/threonine-protein kinase At4g25390 OS=Arabidopsis thaliana OX=3702 GN=At4g25390 PE=2 SV=1	T	Signal transduction mechanisms	LOW QUALITY PROTEIN: receptor-like serine/threonine-protein kinase At4g25390 [Glycine max]	molecular function: catalytic activity (GO:0003824);; biological process: metabolic process (GO:0008152);; biological process: cellular process (GO:0009987);; molecular function: binding (GO:0005488);; cellular component: membrane (GO:0016020);; cellular component: membrane part (GO:0044425)
gene-LOC100796449	1.78843	0.852811	2.03062	1.33146	1.30276	2.151	0.000384499	1.48	up	[P]	Inorganic ion transport and metabolism	Molecular Function: potassium ion transmembrane transporter activity (GO:0015079);; Cellular Component: integral component of membrane (GO:0016021);;	K03549|0.0e+00|gmx:100796449|K03549 KUP system potassium uptake protein | (RefSeq) potassium transporter 10	--	--	--	K+ potassium transporter	Probable potassium transporter 11 OS=Oryza sativa subsp. japonica OX=39947 GN=HAK11 PE=2 SV=4	P	Inorganic ion transport and metabolism	potassium transporter 10 [Glycine max]	molecular function: transporter activity (GO:0005215);; biological process: localization (GO:0051179);; cellular component: membrane (GO:0016020);; cellular component: membrane part (GO:0044425)
gene-LOC100777821	22.6276	21.3347	17.6294	16.6298	14.5226	20.2302	4.87878e-07	1.17874	up	[J]	Translation, ribosomal structure and biogenesis	Molecular Function: RNA binding (GO:0003723);; Molecular Function: mRNA binding (GO:0003729);; Cellular Component: nucleus (GO:0005634);; Biological Process: mRNA processing (GO:0006397);; Biological Process: regulation of RNA metabolic process (GO:0051252);; Cellular Component: ribonucleoprotein complex (GO:1990904);;	K13195|9.0e-40|pper:109950660|K13195 cold-inducible RNA-binding protein | (RefSeq) glycine-rich RNA-binding protein-like isoform X1	--	[R]	General function prediction only	RNA recognition motif. (a.k.a. RRM, RBD, or RNP domain)	Glycine-rich RNA-binding protein GRP2A OS=Sinapis alba OX=3728 PE=2 SV=1	A	RNA processing and modification	glycine-rich RNA-binding protein 2 [Glycine max]	molecular function: binding (GO:0005488);; cellular component: cell (GO:0005623);; cellular component: organelle (GO:0043226);; cellular component: cell part (GO:0044464);; biological process: metabolic process (GO:0008152);; biological process: cellular process (GO:0009987);; biological process: biological regulation (GO:0065007);; cellular component: macromolecular complex (GO:0032991)
gene-LOC100809595	5.04685	4.43071	4.43106	9.82385	7.34535	9.36336	1.88817e-36	2.36692	up	--	--	Cellular Component: nucleus (GO:0005634);; Biological Process: signal transduction (GO:0007165);; Biological Process: negative regulation of transcription, DNA-templated (GO:0045892);;	--	--	--	--	Ethylene-responsive binding factor-associated repression	Ninja-family protein AFP3 OS=Arabidopsis thaliana OX=3702 GN=AFP3 PE=1 SV=1	S	Function unknown	ninja-family protein AFP2 [Glycine max]	cellular component: cell (GO:0005623);; cellular component: organelle (GO:0043226);; cellular component: cell part (GO:0044464);; biological process: cellular process (GO:0009987);; biological process: biological regulation (GO:0065007)
gene-LOC100808843	2.79085	2.76485	2.53712	1.99352	2.51676	1.72652	0.00199398	1.10463	up	--	--	Molecular Function: protein binding (GO:0005515);;	K03122|7.6e-07|mdm:114825099|K03122 transcription initiation factor TFIIA large subunit | (RefSeq) uncharacterized protein LOC114825099	Basal transcription factors (ko03022)	--	--	PB1 domain	--	S	Function unknown	uncharacterized protein LOC100808843 [Glycine max]	molecular function: binding (GO:0005488)
gene-LOC100803168	1.84357	2.31264	1.94824	0.143365	0	0.032529	1.08873e-05	-3.43186	down	--	--	Cellular Component: integral component of membrane (GO:0016021);;	--	--	--	--	Family of unknown function (DUF716)	--	S	Function unknown	uncharacterized protein LOC100803168 [Glycine max]	cellular component: membrane (GO:0016020);; cellular component: membrane part (GO:0044425)
gene-LOC100778851	7.20649	5.63061	8.04696	0.025048	0.095682	0.126781	2.38575e-23	-4.7623	down	--	--	Biological Process: lipid metabolic process (GO:0006629);;	K18875|0.0e+00|gmx:100778851|K18875 enhanced disease susceptibility 1 protein | (RefSeq) uncharacterized protein LOC100778851	Plant-pathogen interaction (ko04626)	--	--	Enhanced disease susceptibility 1 protein EP domain	Protein EDS1L OS=Arabidopsis thaliana OX=3702 GN=EDS1 PE=1 SV=1	T	Signal transduction mechanisms	protein EDS1L-like [Glycine soja]	biological process: metabolic process (GO:0008152);; biological process: single-organism process (GO:0044699)
gene-LOC100806782	2.48821	0.806458	3.39032	0	0	0	6.58709e-08	-6.77626	down	[G]	Carbohydrate transport and metabolism	Biological Process: lipid metabolic process (GO:0006629);; Molecular Function: phosphoric diester hydrolase activity (GO:0008081);;	--	--	--	--	--	PI-PLC X domain-containing protein At5g67130 OS=Arabidopsis thaliana OX=3702 GN=At5g67130 PE=1 SV=1	S	Function unknown	PI-PLC X domain-containing protein At5g67130 isoform X1 [Glycine max]	biological process: metabolic process (GO:0008152);; biological process: single-organism process (GO:0044699);; molecular function: catalytic activity (GO:0003824)
gene-LOC100808604	118.838	108.538	120.065	155.372	179.601	114.677	2.69971e-09	1.84365	up	[O]	Posttranslational modification, protein turnover, chaperones	Molecular Function: ATP binding (GO:0005524);; Biological Process: protein folding (GO:0006457);; Biological Process: response to heat (GO:0009408);; Molecular Function: heat shock protein binding (GO:0031072);; Molecular Function: metal ion binding (GO:0046872);; Molecular Function: unfolded protein binding (GO:0051082);;	K09503|1.6e-230|gmx:100808604|K09503 DnaJ homolog subfamily A member 2 | (RefSeq) uncharacterized protein LOC100808604	Protein processing in endoplasmic reticulum (ko04141)	[O]	Posttranslational modification, protein turnover, chaperones	DnaJ C terminal domain	DnaJ protein homolog ANJ1 OS=Atriplex nummularia OX=3553 PE=2 SV=1	O	Posttranslational modification, protein turnover, chaperones	chaperone protein dnaJ isoform 2 [Glycine max]	molecular function: binding (GO:0005488);; biological process: cellular process (GO:0009987);; biological process: response to stimulus (GO:0050896)
gene-LOC100815472	12.5789	18.2764	14.4162	2.9158	2.18279	1.78318	0.00017259	-1.25283	down	[Z]	Cytoskeleton	Molecular Function: ATP binding (GO:0005524);; Cellular Component: cytoplasm (GO:0005737);; Cellular Component: cytoskeleton (GO:0005856);;	K10355|1.1e-217|gmx:100815472|K10355 actin, other eukaryote | (RefSeq) actin	--	[Z]	Cytoskeleton	Actin	Actin OS=Gossypium hirsutum OX=3635 PE=3 SV=1	Z	Cytoskeleton	actin [Glycine max]	molecular function: binding (GO:0005488);; cellular component: cell (GO:0005623);; cellular component: cell part (GO:0044464);; cellular component: organelle (GO:0043226)
gene-LOC100803663	0.123055	0.335767	0.250126	42.8189	16.6677	22.1252	1.11592e-70	7.99139	up	[V]	Defense mechanisms	Molecular Function: peroxidase activity (GO:0004601);; Molecular Function: peroxiredoxin activity (GO:0051920);;	K11188|8.7e-51|gmx:100820616|K11188 peroxiredoxin 6 [EC:1.11.1.7 1.11.1.27 3.1.1.-] | (RefSeq) 1-Cys peroxiredoxin	Glutathione metabolism (ko00480);; Phenylpropanoid biosynthesis (ko00940)	[O]	Posttranslational modification, protein turnover, chaperones	C-terminal domain of 1-Cys peroxiredoxin	1-Cys peroxiredoxin OS=Medicago truncatula OX=3880 PE=2 SV=1	O	Posttranslational modification, protein turnover, chaperones	1-Cys peroxiredoxin [Glycine max]	molecular function: catalytic activity (GO:0003824);; molecular function: antioxidant activity (GO:0016209);; biological process: metabolic process (GO:0008152);; biological process: cellular process (GO:0009987);; biological process: single-organism process (GO:0044699);; biological process: response to stimulus (GO:0050896);; biological process: detoxification (GO:0098754)
gene-LOC100820627	2.31908	2.64551	2.94427	0.221462	0.328676	0.212127	1.58558e-05	-1.82319	down	--	--	--	--	--	--	--	--	Protein SINE1 OS=Arabidopsis thaliana OX=3702 GN=SINE1 PE=1 SV=1	--	--	hypothetical protein GLYMA_16G152900 [Glycine max]	--
gene-LOC100795144	11.5672	10.84	10.595	0.055201	0	0.169457	4.69997e-22	-5.54642	down	[G]	Carbohydrate transport and metabolism	Molecular Function: beta-galactosidase activity (GO:0004565);; Cellular Component: cell wall (GO:0005618);; Cellular Component: vacuole (GO:0005773);; Biological Process: carbohydrate metabolic process (GO:0005975);;	K12309|2.8e-273|csat:104791541|K12309 beta-galactosidase [EC:3.2.1.23] | (RefSeq) beta-galactosidase 2 isoform X1	Galactose metabolism (ko00052);; Other glycan degradation (ko00511);; Glycosaminoglycan degradation (ko00531);; Sphingolipid metabolism (ko00600);; Glycosphingolipid biosynthesis - ganglio series (ko00604)	[G]	Carbohydrate transport and metabolism	Glycosyl hydrolases family 35	Beta-galactosidase 3 OS=Arabidopsis thaliana OX=3702 GN=BGAL3 PE=2 SV=1	G	Carbohydrate transport and metabolism	beta-galactosidase 5 [Glycine max]	molecular function: catalytic activity (GO:0003824);; cellular component: cell (GO:0005623);; cellular component: cell part (GO:0044464);; cellular component: organelle (GO:0043226);; biological process: metabolic process (GO:0008152)
gene-LOC100784233	3.12592	6.49205	2.90124	0	0	0.032059	3.18014e-09	-5.71616	down	--	--	Biological Process: response to auxin (GO:0009733);;	K14488|1.5e-46|gmx:100784233|K14488 SAUR family protein | (RefSeq) auxin-induced protein 6B-like	Plant hormone signal transduction (ko04075)	--	--	Auxin responsive protein	Auxin-induced protein 6B OS=Glycine max OX=3847 PE=2 SV=1	S	Function unknown	auxin-induced protein 6B-like [Glycine max]	biological process: response to stimulus (GO:0050896)
gene-LOC100810469	22.9282	35.1171	19.9735	3.15725	3.88284	3.27374	0.000147455	-1.42678	down	[GR]	Carbohydrate transport and metabolism;; General function prediction only	Molecular Function: hydrolase activity (GO:0016787);;	K20884|1.3e-12|vvi:100253969|K20884 riboflavin kinase / FMN hydrolase [EC:2.7.1.26 3.1.3.102] | (RefSeq) bifunctional riboflavin kinase/FMN phosphatase	Riboflavin metabolism (ko00740)	--	--	Haloacid dehalogenase-like hydrolase	Haloacid dehalogenase-like hydrolase domain-containing protein At4g39970 OS=Arabidopsis thaliana OX=3702 GN=At4g39970 PE=2 SV=1	S	Function unknown	haloacid dehalogenase-like hydrolase domain-containing protein At4g39970 [Glycine max]	molecular function: catalytic activity (GO:0003824)
gene-LOC100780092	0.407747	1.12483	0.553637	0	0	0	9.74167e-07	-6.30956	down	[G]	Carbohydrate transport and metabolism	Molecular Function: beta-galactosidase activity (GO:0004565);; Cellular Component: cell wall (GO:0005618);; Cellular Component: vacuole (GO:0005773);; Biological Process: carbohydrate metabolic process (GO:0005975);; Molecular Function: carbohydrate binding (GO:0030246);;	K12309|1.7e-178|csat:104711840|K12309 beta-galactosidase [EC:3.2.1.23] | (RefSeq) LOW QUALITY PROTEIN: beta-galactosidase 2	Galactose metabolism (ko00052);; Other glycan degradation (ko00511);; Glycosaminoglycan degradation (ko00531);; Sphingolipid metabolism (ko00600);; Glycosphingolipid biosynthesis - ganglio series (ko00604)	[G]	Carbohydrate transport and metabolism	Glycosyl hydrolases family 35	Beta-galactosidase 13 OS=Arabidopsis thaliana OX=3702 GN=BGAL13 PE=2 SV=1	G	Carbohydrate transport and metabolism	beta-galactosidase 13 isoform X1 [Glycine max]	molecular function: catalytic activity (GO:0003824);; cellular component: cell (GO:0005623);; cellular component: cell part (GO:0044464);; cellular component: organelle (GO:0043226);; biological process: metabolic process (GO:0008152);; molecular function: binding (GO:0005488)
gene-LOC100796281	6.98684	4.32326	7.88154	0.633055	0.116568	0.602301	1.06862e-05	-2.30251	down	[I]	Lipid transport and metabolism	Molecular Function: polyneuridine-aldehyde esterase activity (GO:0050529);;	K20802|4.6e-69|ath:AT5G10300|K20802 (R)-mandelonitrile lyase [EC:4.1.2.10] | (RefSeq) MES5; methyl esterase 5	Cyanoamino acid metabolism (ko00460)	--	--	Alpha/beta hydrolase family	Salicylic acid-binding protein 2 OS=Nicotiana tabacum OX=4097 GN=SABP2 PE=1 SV=1	S	Function unknown	uncharacterized protein LOC100796281 [Glycine max]	molecular function: catalytic activity (GO:0003824)
gene-LOC547496	0.046884	0.188097	0.095098	596.418	227.034	661.236	2.20282e-116	12.7905	up	--	--	Molecular Function: zinc ion binding (GO:0008270);;	K02995|5.9e-17|mtr:MTR_8g012330|K02995 small subunit ribosomal protein S8e | (RefSeq) 40S ribosomal protein S8	Ribosome (ko03010)	--	--	Plant PEC family metallothionein	Metallothionein-like protein 4B OS=Arabidopsis thaliana OX=3702 GN=MT4B PE=2 SV=2	S	Function unknown	metallothionein-II protein isoform X1 [Glycine max]	molecular function: binding (GO:0005488)
gene-LOC100789574	1.33133	0.92087	1.29302	1.01236	1.00594	0.8952	0.000536294	1.18216	up	[R]	General function prediction only	Molecular Function: protein kinase activity (GO:0004672);; Molecular Function: ATP binding (GO:0005524);; Molecular Function: ligase activity (GO:0016874);;	K16279|3.8e-37|zma:103635738|K16279 E3 ubiquitin-protein ligase KEG [EC:2.7.11.1 2.3.2.27] | (RefSeq) E3 ubiquitin-protein ligase KEG	--	[T]	Signal transduction mechanisms	Protein tyrosine and serine/threonine kinase	E3 ubiquitin-protein ligase KEG OS=Arabidopsis thaliana OX=3702 GN=KEG PE=1 SV=2	T	Signal transduction mechanisms	E3 ubiquitin-protein ligase KEG isoform X1 [Glycine max]	molecular function: catalytic activity (GO:0003824);; biological process: metabolic process (GO:0008152);; biological process: cellular process (GO:0009987);; molecular function: binding (GO:0005488)
gene-LOC102668560	3.08003	2.90979	3.82465	3.28176	2.14506	2.36686	0.000418186	1.1057	up	--	--	Biological Process: reproduction (GO:0000003);; Biological Process: polysaccharide biosynthetic process (GO:0000271);; Biological Process: cell morphogenesis (GO:0000902);; Biological Process: cell morphogenesis involved in differentiation (GO:0000904);; Biological Process: regulation of cell growth (GO:0001558);; Biological Process: developmental process involved in reproduction (GO:0003006);; B…	K11000|2.3e-33|gmx:100777245|K11000 callose synthase [EC:2.4.1.-] | (RefSeq) callose synthase 5	--	[M]	Cell wall/membrane/envelope biogenesis	--	Callose synthase 5 OS=Arabidopsis thaliana OX=3702 GN=CALS5 PE=1 SV=1	M	Cell wall/membrane/envelope biogenesis	callose synthase 5-like [Glycine max]	biological process: reproduction (GO:0000003);; biological process: metabolic process (GO:0008152);; biological process: single-organism process (GO:0044699);; biological process: cellular process (GO:0009987);; biological process: developmental process (GO:0032502);; biological process: cellular component organization or biogenesis (GO:0071840);; biological process: biological regulation (GO:006…
gene-LOC100779977	10.3712	14.4793	10.6894	0.553497	0.691535	0.643818	1.88144e-16	-2.71962	down	--	--	Molecular Function: transcription factor activity, sequence-specific DNA binding (GO:0003700);; Cellular Component: nucleus (GO:0005634);; Biological Process: regulation of transcription, DNA-templated (GO:0006355);; Molecular Function: sequence-specific DNA binding (GO:0043565);;	K14494|1.1e-59|pop:18099385|K14494 DELLA protein | (RefSeq) DELLA protein GAI	Plant hormone signal transduction (ko04075)	--	--	GRAS domain family	Scarecrow-like transcription factor PAT1 OS=Arabidopsis thaliana OX=3702 GN=PAT1 PE=1 SV=1	K	Transcription	scarecrow-like protein 21 [Glycine max]	molecular function: nucleic acid binding transcription factor activity (GO:0001071);; biological process: biological regulation (GO:0065007);; cellular component: cell (GO:0005623);; cellular component: organelle (GO:0043226);; cellular component: cell part (GO:0044464);; molecular function: binding (GO:0005488)
gene-LOC100797246	2.80993	9.66065	2.6468	0.027157	0	0.088448	4.82972e-10	-4.98563	down	--	--	Cellular Component: integral component of membrane (GO:0016021);;	--	--	--	--	--	--	--	--	uncharacterized protein LOC100797246 [Glycine max]	cellular component: membrane (GO:0016020);; cellular component: membrane part (GO:0044425)
gene-LOC100805486	1.82019	5.20584	1.38706	0	0	0	1.68639e-08	-7.01321	down	[IR]	Lipid transport and metabolism;; General function prediction only	Molecular Function: hydrolase activity, acting on ester bonds (GO:0016788);; Molecular Function: 9,9'-dicis-carotene:quinone oxidoreductase activity (GO:0052886);; Molecular Function: 7,9,9'-tricis-neurosporene:quinone oxidoreductase activity (GO:0052887);;	K10691|3.7e-82|ats:109762802|K10691 E3 ubiquitin-protein ligase UBR4 [EC:2.3.2.27] | (RefSeq) LOC109762802; auxin transport protein BIG	--	--	--	GDSL-like Lipase/Acylhydrolase	GDSL esterase/lipase At2g42990 OS=Arabidopsis thaliana OX=3702 GN=At2g42990 PE=2 SV=1	I	Lipid transport and metabolism	GDSL esterase/lipase At2g42990 [Glycine max]	molecular function: catalytic activity (GO:0003824);; biological process: metabolic process (GO:0008152);; biological process: single-organism process (GO:0044699)
gene-LOC100801617	6.71984	8.78578	6.71383	5.83998	4.11724	6.71496	0.000186335	1.00466	up	[M]	Cell wall/membrane/envelope biogenesis	Molecular Function: GDP-Man:Man3GlcNAc2-PP-Dol alpha-1,2-mannosyltransferase activity (GO:0004377);; Cellular Component: endoplasmic reticulum membrane (GO:0005789);; Biological Process: protein N-linked glycosylation (GO:0006487);; Biological Process: oligosaccharide-lipid intermediate biosynthetic process (GO:0006490);; Cellular Component: integral component of membrane (GO:0016021);;	K03844|3.1e-270|gmx:100801617|K03844 alpha-1,2-mannosyltransferase [EC:2.4.1.131] | (RefSeq) GDP-Man:Man(3)GlcNAc(2)-PP-Dol alpha-1,2-mannosyltransferase	N-Glycan biosynthesis (ko00510);; Various types of N-glycan biosynthesis (ko00513)	[M]	Cell wall/membrane/envelope biogenesis	ALG11 mannosyltransferase N-terminus	GDP-Man:Man(3)GlcNAc(2)-PP-Dol alpha-1,2-mannosyltransferase OS=Arabidopsis thaliana OX=3702 GN=ALG11 PE=1 SV=2	M	Cell wall/membrane/envelope biogenesis	GDP-Man:Man(3)GlcNAc(2)-PP-Dol alpha-1,2-mannosyltransferase [Glycine max]	molecular function: catalytic activity (GO:0003824);; biological process: metabolic process (GO:0008152);; biological process: single-organism process (GO:0044699);; cellular component: cell (GO:0005623);; cellular component: membrane (GO:0016020);; cellular component: organelle (GO:0043226);; cellular component: organelle part (GO:0044422);; cellular component: membrane part (GO:0044425);; cellu…
gene-LOC100794552	6.24531	3.31499	6.52894	0.394556	0.259804	0.139145	1.94749e-09	-2.78263	down	--	--	Cellular Component: nucleus (GO:0005634);; Biological Process: regulation of transcription, DNA-templated (GO:0006355);; Molecular Function: lipid binding (GO:0008289);; Molecular Function: sequence-specific DNA binding (GO:0043565);;	K09338|0.0e+00|gmx:100794552|K09338 homeobox-leucine zipper protein | (RefSeq) homeobox-leucine zipper protein HDG11 isoform X2	--	--	--	START domain	Homeobox-leucine zipper protein HDG11 OS=Arabidopsis thaliana OX=3702 GN=HDG11 PE=1 SV=1	K	Transcription	homeobox-leucine zipper protein HDG11 isoform X1 [Glycine max]	cellular component: cell (GO:0005623);; cellular component: organelle (GO:0043226);; cellular component: cell part (GO:0044464);; biological process: biological regulation (GO:0065007);; molecular function: binding (GO:0005488)
gene-LOC100799697	1.39335	1.43318	1.36104	0	0	0	1.97258e-05	-5.68356	down	--	--	Cellular Component: integral component of membrane (GO:0016021);;	K19041|6.0e-143|gmx:100799697|K19041 E3 ubiquitin-protein ligase RNF38/44 [EC:2.3.2.27] | (RefSeq) NEP1-interacting protein-like 2	--	[O]	Posttranslational modification, protein turnover, chaperones	Ring finger domain	NEP1-interacting protein 1 OS=Arabidopsis thaliana OX=3702 GN=NIP1 PE=1 SV=2	O	Posttranslational modification, protein turnover, chaperones	NEP1-interacting protein-like 2 [Glycine max]	cellular component: membrane (GO:0016020);; cellular component: membrane part (GO:0044425)
gene-LOC100500181	40.8416	56.9438	38.3133	0.176091	0	0.66576	4.80368e-06	-5.09778	down	--	--	--	--	--	--	--	PAR1 protein	--	S	Function unknown	putative PAR1 protein precursor [Glycine max]	--
gene-LOC100818915	47.0337	83.5257	53.3209	11.5049	8.99953	10.5761	0.000502677	-1.11739	down	[G]	Carbohydrate transport and metabolism	Molecular Function: fructose-bisphosphate aldolase activity (GO:0004332);; Biological Process: glycolytic process (GO:0006096);;	K01623|2.0e-225|gmx:100818383|K01623 fructose-bisphosphate aldolase, class I [EC:4.1.2.13] | (RefSeq) fructose-bisphosphate aldolase 1, chloroplastic	Glycolysis / Gluconeogenesis (ko00010);; Pentose phosphate pathway (ko00030);; Fructose and mannose metabolism (ko00051);; Carbon fixation in photosynthetic organisms (ko00710);; Carbon metabolism (ko01200);; Biosynthesis of amino acids (ko01230)	[G]	Carbohydrate transport and metabolism	Fructose-bisphosphate aldolase class-I	Fructose-bisphosphate aldolase 1, chloroplastic (Fragment) OS=Pisum sativum OX=3888 PE=1 SV=1	G	Carbohydrate transport and metabolism	fructose-bisphosphate aldolase 1, chloroplastic [Glycine max]	molecular function: catalytic activity (GO:0003824);; biological process: metabolic process (GO:0008152);; biological process: cellular process (GO:0009987);; biological process: single-organism process (GO:0044699)
gene-LOC102666110	3.05495	5.11115	1.89349	0	0	0	8.22454e-08	-6.71652	down	[O]	Posttranslational modification, protein turnover, chaperones	Molecular Function: ATP-dependent peptidase activity (GO:0004176);; Molecular Function: serine-type endopeptidase activity (GO:0004252);; Molecular Function: ATP binding (GO:0005524);; Biological Process: protein catabolic process (GO:0030163);;	K07277|7.8e-13|gmx:100801556|K07277 outer membrane protein insertion porin family | (RefSeq) outer envelope protein 80, chloroplastic	--	[O]	Posttranslational modification, protein turnover, chaperones	--	Lon protease homolog 2, peroxisomal OS=Arabidopsis thaliana OX=3702 GN=LON2 PE=2 SV=1	O	Posttranslational modification, protein turnover, chaperones	uncharacterized protein LOC102666110 isoform X1 [Glycine max]	molecular function: catalytic activity (GO:0003824);; biological process: metabolic process (GO:0008152);; molecular function: binding (GO:0005488)
gene-LOC100812862	7.39938	6.86516	7.59323	0.443183	0.300182	0.30559	3.56169e-24	-2.90481	down	[DPM]	Cell cycle control, cell division, chromosome partitioning;; Inorganic ion transport and metabolism;; Cell wall/membrane/envelope biogenesis	Molecular Function: copper ion binding (GO:0005507);; Molecular Function: oxidoreductase activity (GO:0016491);;	K06324|2.8e-79|zju:107409543|K06324 spore coat protein A, manganese oxidase [EC:1.16.3.3] | (RefSeq) uncharacterized protein LOC107409543	--	--	--	Multicopper oxidase	Multicopper oxidase LPR2 OS=Arabidopsis thaliana OX=3702 GN=LPR2 PE=2 SV=1	Q	Secondary metabolites biosynthesis, transport and catabolism	multicopper oxidase LPR2 [Glycine max]	molecular function: binding (GO:0005488);; molecular function: catalytic activity (GO:0003824)
gene-LOC100809488	9.94411	8.14635	10.1478	0.7397	0.840318	0.599334	1.99563e-12	-2.21512	down	--	--	Molecular Function: protein binding (GO:0005515);; Cellular Component: cellular_component (GO:0005575);; Cellular Component: intracellular (GO:0005622);; Cellular Component: cell (GO:0005623);; Cellular Component: nucleus (GO:0005634);; Cellular Component: cytoplasm (GO:0005737);; Cellular Component: organelle (GO:0043226);; Cellular Component: membrane-bounded organelle (GO:0043227);; Cellular C…	--	--	[S]	Function unknown	Armadillo/beta-catenin-like repeat	--	S	Function unknown	protein spotted leaf 11 [Glycine max]	molecular function: binding (GO:0005488);; cellular component: cell (GO:0005623);; cellular component: cell part (GO:0044464);; cellular component: organelle (GO:0043226)
gene-LOC100794970	9.45054	4.9334	7.12357	0.217112	0	0.058296	1.84892e-09	-4.32582	down	--	--	Molecular Function: DNA binding (GO:0003677);; Cellular Component: nucleus (GO:0005634);;	K15397|1.1e-17|cpep:111776416|K15397 3-ketoacyl-CoA synthase [EC:2.3.1.199] | (RefSeq) 3-ketoacyl-CoA synthase 17-like	Fatty acid elongation (ko00062);; Plant-pathogen interaction (ko04626)	[O]	Posttranslational modification, protein turnover, chaperones	Myb-like DNA-binding domain	Protein RADIALIS-like 2 OS=Arabidopsis thaliana OX=3702 GN=RL2 PE=2 SV=1	K	Transcription	protein RADIALIS-like 3 [Glycine max]	molecular function: binding (GO:0005488);; cellular component: cell (GO:0005623);; cellular component: organelle (GO:0043226);; cellular component: cell part (GO:0044464)
gene-LOC100792902	1.66541	1.71635	1.51918	0.239366	0.127654	0.282916	0.00406476	-1.37306	down	--	--	Molecular Function: protein dimerization activity (GO:0046983);;	K22484|3.4e-29|pvu:PHAVU_001G121200g|K22484 transcriptional regulator CBF1 | (RefSeq) hypothetical protein	--	--	--	Helix-loop-helix DNA-binding domain	Transcription factor bHLH30 OS=Arabidopsis thaliana OX=3702 GN=BHLH30 PE=1 SV=1	K	Transcription	transcription factor bHLH30 [Glycine max]	molecular function: binding (GO:0005488)
gene-LOC100777018	10.9792	13.6542	12.102	0.184992	0.172932	0.385134	2.98705e-33	-4.15288	down	--	--	--	K06630|2.0e-09|soe:110789589|K06630 14-3-3 protein epsilon | (RefSeq) uncharacterized protein LOC110789589	--	--	--	Transcription factor regulating root and shoot growth via Pin3	Protein Brevis radix-like 4 OS=Arabidopsis thaliana OX=3702 GN=BRXL4 PE=2 SV=1	S	Function unknown	protein Brevis radix-like 4 isoform X2 [Glycine max]	--
gene-LOC100775382	19.3246	14.1786	21.9162	0.268148	0.113396	0.813921	1.38023e-14	-3.95876	down	[R]	General function prediction only	--	K21568|1.6e-180|gmx:100775382|K21568 pinoresinol/lariciresinol reductase [EC:1.23.1.1 1.23.1.2 1.23.1.3 1.23.1.4] | (RefSeq) isoflavone reductase homolog	Biosynthesis of various secondary metabolites - part 2 (ko00998)	--	--	NmrA-like family	Isoflavone reductase homolog OS=Lupinus albus OX=3870 PE=2 SV=1	S	Function unknown	isoflavone reductase homolog [Glycine max]	--
gene-LOC100811504	1.911	0.897393	1.73197	0.169989	0.170622	0.169185	0.00168525	-1.58356	down	[T]	Signal transduction mechanisms	Molecular Function: protein serine/threonine kinase activity (GO:0004674);; Molecular Function: ATP binding (GO:0005524);; Cellular Component: plasma membrane (GO:0005886);; Biological Process: protein phosphorylation (GO:0006468);; Cellular Component: integral component of membrane (GO:0016021);;	K24104|2.9e-71|thj:104799061|K24104 GPN-loop GTPase | (RefSeq) LOW QUALITY PROTEIN: uncharacterized protein LOC104799061	--	--	--	Protein tyrosine and serine/threonine kinase	G-type lectin S-receptor-like serine/threonine-protein kinase CES101 OS=Arabidopsis thaliana OX=3702 GN=CES101 PE=2 SV=2	T	Signal transduction mechanisms	G-type lectin S-receptor-like serine/threonine-protein kinase CES101 isoform X1 [Glycine max]	molecular function: catalytic activity (GO:0003824);; biological process: metabolic process (GO:0008152);; biological process: cellular process (GO:0009987);; molecular function: binding (GO:0005488);; cellular component: cell (GO:0005623);; cellular component: membrane (GO:0016020);; cellular component: cell part (GO:0044464);; cellular component: membrane part (GO:0044425)
gene-LOC100799685	3.80531	5.78622	4.91983	0.229612	0.108812	0.654776	2.85998e-05	-2.35348	down	--	--	Molecular Function: transferase activity, transferring acyl groups other than amino-acyl groups (GO:0016747);;	K19861|3.5e-266|gmx:100799685|K19861 benzyl alcohol O-benzoyltransferase [EC:2.3.1.196 2.3.1.232] | (RefSeq) benzyl alcohol O-benzoyltransferase	--	--	--	Transferase family	Benzyl alcohol O-benzoyltransferase OS=Nicotiana tabacum OX=4097 GN=HSR201 PE=1 SV=1	S	Function unknown	benzyl alcohol O-benzoyltransferase [Glycine max]	molecular function: catalytic activity (GO:0003824)
gene-LOC100801020	1.29707	1.19085	1.71409	2.18963	1.5624	1.01458	6.39115e-05	1.60469	up	--	--	--	--	--	--	--	--	--	--	--	hypothetical protein GLYMA_13G205500 [Glycine max]	--
gene-LOC100811871	40.1781	34.8986	39.3872	0.072719	0.109927	0.020692	1.41224e-72	-7.48842	down	[V]	Defense mechanisms	Cellular Component: vacuolar membrane (GO:0005774);; Molecular Function: solute:proton antiporter activity (GO:0015299);; Cellular Component: membrane (GO:0016020);; Cellular Component: integral component of membrane (GO:0016021);; Molecular Function: transmembrane transporter activity (GO:0022857);; Molecular Function: xenobiotic transporter activity (GO:0042910);;	K03327|2.9e-277|gmx:100811871|K03327 multidrug resistance protein, MATE family | (RefSeq) protein DETOXIFICATION 41	--	[R]	General function prediction only	MatE	Protein DETOXIFICATION 41 OS=Arabidopsis thaliana OX=3702 GN=DTX41 PE=2 SV=1	V	Defense mechanisms	protein DETOXIFICATION 41 [Glycine max]	cellular component: cell (GO:0005623);; cellular component: membrane (GO:0016020);; cellular component: organelle (GO:0043226);; cellular component: organelle part (GO:0044422);; cellular component: cell part (GO:0044464);; molecular function: transporter activity (GO:0005215);; biological process: single-organism process (GO:0044699);; biological process: localization (GO:0051179);; cellular com…
gene-LOC100813782	14.26	15.7896	15.3182	1.88699	2.21836	2.47371	1.71567e-06	-1.30388	down	[M]	Cell wall/membrane/envelope biogenesis	Cellular Component: chloroplast thylakoid membrane (GO:0009535);; Biological Process: thylakoid membrane organization (GO:0010027);; Cellular Component: integral component of membrane (GO:0016021);; Molecular Function: membrane insertase activity (GO:0032977);; Biological Process: protein insertion into membrane (GO:0051205);; Biological Process: protein localization to chloroplast (GO:0072598);;	K03217|1.3e-241|gmx:100813782|K03217 YidC/Oxa1 family membrane protein insertase | (RefSeq) inner membrane protein PPF-1, chloroplastic	Protein export (ko03060)	[OU]	Posttranslational modification, protein turnover, chaperones;; Intracellular trafficking, secretion, and vesicular transport	60Kd inner membrane protein	Inner membrane protein PPF-1, chloroplastic OS=Pisum sativum OX=3888 GN=PPF-1 PE=2 SV=2	--	--	inner membrane protein PPF-1, chloroplastic [Glycine max]	cellular component: cell (GO:0005623);; cellular component: membrane (GO:0016020);; cellular component: organelle (GO:0043226);; cellular component: organelle part (GO:0044422);; cellular component: cell part (GO:0044464);; biological process: cellular process (GO:0009987);; biological process: single-organism process (GO:0044699);; biological process: cellular component organization or biogenesi…
gene-LOC100785531	13.021	14.0833	12.4067	13.1633	6.87694	11.2572	5.21244e-06	1.08543	up	--	--	Molecular Function: RNA binding (GO:0003723);;	K18666|4.7e-291|gmx:100785531|K18666 activating signal cointegrator complex subunit 1 | (RefSeq) uncharacterized protein LOC100785531 isoform X1	--	[K]	Transcription	AKAP7 2'5' RNA ligase-like domain	--	K	Transcription	uncharacterized protein LOC100785531 isoform X1 [Glycine max]	molecular function: binding (GO:0005488)
gene-LOC100815998	13.6892	15.9667	12.9316	2.47474	1.57059	3.32647	0.000385915	-1.09387	down	--	--	Molecular Function: protein binding (GO:0005515);;	--	--	--	--	CUE domain	--	S	Function unknown	uncharacterized protein LOC100815998 [Glycine max]	molecular function: binding (GO:0005488)
gene-LOC100787548	10.6807	9.21086	8.71836	8.3123	5.7106	10.0617	6.24215e-07	1.17808	up	--	--	--	K01513|2.7e-29|ats:109769794|K01513 ectonucleotide pyrophosphatase/phosphodiesterase family member 1/3 [EC:3.1.4.1 3.6.1.9] | (RefSeq) uncharacterized protein LOC109769794	Purine metabolism (ko00230);; Pyrimidine metabolism (ko00240);; Starch and sucrose metabolism (ko00500);; Riboflavin metabolism (ko00740);; Nicotinate and nicotinamide metabolism (ko00760);; Pantothenate and CoA biosynthesis (ko00770)	--	--	Plant protein 1589 of unknown function (A_thal_3526)	--	S	Function unknown	uncharacterized protein LOC100787548 isoform X1 [Glycine max]	--
gene-LOC100816304	5.8499	6.44082	5.65949	0.364725	0.152753	0.119856	1.17582e-14	-3.28013	down	--	--	Biological Process: protein glycosylation (GO:0006486);; Molecular Function: transferase activity, transferring glycosyl groups (GO:0016757);;	K18789|1.4e-206|gmx:100816304|K18789 xylogalacturonan beta-1,3-xylosyltransferase [EC:2.4.2.41] | (RefSeq) probable glycosyltransferase At5g20260 isoform X1	--	[GMW]	Carbohydrate transport and metabolism;; Cell wall/membrane/envelope biogenesis;; Extracellular structures	Exostosin family	Xylogalacturonan beta-1,3-xylosyltransferase OS=Arabidopsis thaliana OX=3702 GN=XGD1 PE=1 SV=2	--	--	xylogalacturonan beta-1,3-xylosyltransferase isoform X2 [Glycine max]	biological process: metabolic process (GO:0008152);; biological process: cellular process (GO:0009987);; biological process: single-organism process (GO:0044699);; molecular function: catalytic activity (GO:0003824)
gene-LOC100817754	11.1338	16.8999	10.479	0	0.101446	0	2.03649e-05	-5.2981	down	[G]	Carbohydrate transport and metabolism	Molecular Function: water channel activity (GO:0015250);; Cellular Component: integral component of membrane (GO:0016021);;	K09873|1.0e-131|gmx:100817754|K09873 aquaporin TIP | (RefSeq) uncharacterized protein LOC100817754	--	[G]	Carbohydrate transport and metabolism	Major intrinsic protein	Aquaporin TIP2-1 OS=Arabidopsis thaliana OX=3702 GN=TIP2-1 PE=1 SV=2	G	Carbohydrate transport and metabolism	aquaporin TIP2-1-like [Glycine max]	molecular function: transporter activity (GO:0005215);; biological process: single-organism process (GO:0044699);; biological process: localization (GO:0051179);; cellular component: membrane (GO:0016020);; cellular component: membrane part (GO:0044425)
gene-LOC102668744	1.61001	0.913023	1.43037	0	0	0	9.74432e-07	-6.26205	down	--	--	--	--	--	--	--	--	--	--	--	uncharacterized protein LOC102668744 [Glycine max]	--
gene-LOC100814910	31.7029	56.0236	32.4133	53.2747	39.8946	39.3437	3.37065e-06	1.56029	up	[G]	Carbohydrate transport and metabolism	Molecular Function: ATP binding (GO:0005524);; Biological Process: glycogen biosynthetic process (GO:0005978);; Molecular Function: glucose-1-phosphate adenylyltransferase activity (GO:0008878);; Cellular Component: chloroplast (GO:0009507);; Biological Process: starch biosynthetic process (GO:0019252);;	K00975|2.4e-303|gmx:100814910|K00975 glucose-1-phosphate adenylyltransferase [EC:2.7.7.27] | (RefSeq) glucose-1-phosphate adenylyltransferase large subunit 1 isoform X1	Starch and sucrose metabolism (ko00500);; Amino sugar and nucleotide sugar metabolism (ko00520)	[M]	Cell wall/membrane/envelope biogenesis	Nucleotidyl transferase	Glucose-1-phosphate adenylyltransferase large subunit 1 (Fragment) OS=Solanum tuberosum OX=4113 GN=AGPS1 PE=1 SV=1	M	Cell wall/membrane/envelope biogenesis	glucose-1-phosphate adenylyltransferase large subunit 1 isoform X1 [Glycine max]	molecular function: binding (GO:0005488);; biological process: metabolic process (GO:0008152);; biological process: cellular process (GO:0009987);; biological process: single-organism process (GO:0044699);; molecular function: catalytic activity (GO:0003824);; cellular component: cell (GO:0005623);; cellular component: organelle (GO:0043226);; cellular component: cell part (GO:0044464)
gene-LOC100798484	14.7044	1.47402	13.5087	0.77995	0.514086	0.828648	0.00112047	-2.22129	down	--	--	Cellular Component: endoplasmic reticulum (GO:0005783);; Biological Process: regulation of transcription, DNA-templated (GO:0006355);; Biological Process: lipid transport (GO:0006869);; Molecular Function: lipid binding (GO:0008289);; Cellular Component: integral component of membrane (GO:0016021);;	K12486|3.9e-06|nnu:104590053|K12486 stromal membrane-associated protein | (RefSeq) probable ADP-ribosylation factor GTPase-activating protein AGD11	Endocytosis (ko04144)	[R]	General function prediction only	C2 domain	Calcium-dependent lipid-binding protein OS=Arabidopsis thaliana OX=3702 GN=CLB PE=1 SV=1	M	Cell wall/membrane/envelope biogenesis	synaptotagmin-5 isoform X1 [Glycine max]	cellular component: cell (GO:0005623);; cellular component: organelle (GO:0043226);; cellular component: cell part (GO:0044464);; biological process: biological regulation (GO:0065007);; biological process: single-organism process (GO:0044699);; biological process: localization (GO:0051179);; molecular function: binding (GO:0005488);; cellular component: membrane (GO:0016020);; cellular component…
gene-LOC100815793	6.20405	4.79655	5.44442	0.165545	0	0.076804	1.11902e-14	-4.39163	down	[R]	General function prediction only	Molecular Function: GTPase activity (GO:0003924);; Molecular Function: GTP binding (GO:0005525);;	K07976|2.2e-101|lja:Lj0g3v0172059.1|K07976 Rab family, other | (RefSeq) Lj0g3v0172059.1; -	--	[U]	Intracellular trafficking, secretion, and vesicular transport	Ras family	Ras-related protein RABA6b OS=Arabidopsis thaliana OX=3702 GN=RABA6B PE=2 SV=2	U	Intracellular trafficking, secretion, and vesicular transport	ras-related protein RABA6b [Glycine max]	molecular function: catalytic activity (GO:0003824);; molecular function: binding (GO:0005488)
Glycine_max_newGene_2016	10.1109	7.6776	9.6665	0.124478	0.051521	0.056272	8.54918e-42	-5.17552	down	[Q]	Secondary metabolites biosynthesis, transport and catabolism	Molecular Function: peroxidase activity (GO:0004601);; Biological Process: response to oxidative stress (GO:0006979);; Molecular Function: heme binding (GO:0020037);;	K10529|1.3e-82|ccaj:109799552|K10529 alpha-dioxygenase [EC:1.14.99.-] | (RefSeq) alpha-dioxygenase 2	alpha-Linolenic acid metabolism (ko00592)	[R]	General function prediction only	Animal haem peroxidase	Alpha-dioxygenase 2 OS=Arabidopsis thaliana OX=3702 GN=DOX2 PE=2 SV=1	S	Function unknown	alpha-dioxygenase 2 [Abrus precatorius]	molecular function: catalytic activity (GO:0003824);; molecular function: antioxidant activity (GO:0016209);; biological process: metabolic process (GO:0008152);; biological process: cellular process (GO:0009987);; biological process: single-organism process (GO:0044699);; biological process: response to stimulus (GO:0050896);; biological process: detoxification (GO:0098754);; molecular function:…
gene-LOC100794510	4.16401	8.74849	4.12708	0	0	0	2.27945e-13	-8.3517	down	--	--	Cellular Component: integral component of membrane (GO:0016021);;	K13993|8.4e-08|peq:110036782|K13993 HSP20 family protein | (RefSeq) 22.0 kDa class IV heat shock protein	Protein processing in endoplasmic reticulum (ko04141)	[O]	Posttranslational modification, protein turnover, chaperones	Hsp20/alpha crystallin family	Inactive protein RESTRICTED TEV MOVEMENT 2 OS=Arabidopsis thaliana OX=3702 GN=RTM2 PE=3 SV=1	O	Posttranslational modification, protein turnover, chaperones	inactive protein RESTRICTED TEV MOVEMENT 2 [Glycine max]	cellular component: membrane (GO:0016020);; cellular component: membrane part (GO:0044425)
gene-LOC100781873	5.54676	4.28708	5.86147	4.08148	5.33167	3.06547	0.00146786	1.16853	up	--	--	Molecular Function: transcription cofactor activity (GO:0003712);; Biological Process: regulation of transcription from RNA polymerase II promoter (GO:0006357);; Cellular Component: mediator complex (GO:0016592);;	K15164|0.0e+00|gmx:100781873|K15164 mediator of RNA polymerase II transcription subunit 13 | (RefSeq) mediator of RNA polymerase II transcription subunit 13 isoform X1	--	[I]	Lipid transport and metabolism	MID domain of medPIWI	Mediator of RNA polymerase II transcription subunit 13 OS=Arabidopsis thaliana OX=3702 GN=MED13 PE=1 SV=1	K	Transcription	mediator of RNA polymerase II transcription subunit 13 isoform X1 [Glycine max]	molecular function: transcription factor activity, protein binding (GO:0000988);; biological process: biological regulation (GO:0065007);; cellular component: cell (GO:0005623);; cellular component: membrane-enclosed lumen (GO:0031974);; cellular component: macromolecular complex (GO:0032991);; cellular component: organelle (GO:0043226);; cellular component: organelle part (GO:0044422);; cellular…
gene-LOC100802144	3.48933	2.74227	3.31745	0.261364	0.274677	0.415234	3.17396e-09	-1.8465	down	--	--	Molecular Function: protein kinase activity (GO:0004672);; Molecular Function: ATP binding (GO:0005524);;	K16240|0.0e+00|gmx:100802144|K16240 protein suppressor of PHYA-105 1 | (RefSeq) protein SUPPRESSOR OF PHYA-105 1	Circadian rhythm - plant (ko04712)	--	--	WD domain, G-beta repeat	Protein SUPPRESSOR OF PHYA-105 1 OS=Arabidopsis thaliana OX=3702 GN=SPA1 PE=1 SV=1	J	Translation, ribosomal structure and biogenesis	protein SUPPRESSOR OF PHYA-105 1 [Glycine max]	molecular function: catalytic activity (GO:0003824);; biological process: metabolic process (GO:0008152);; biological process: cellular process (GO:0009987);; molecular function: binding (GO:0005488)
gene-LOC100820061	1.70321	0.890472	1.39536	0.058725	0	0	5.84219e-05	-3.896	down	--	--	Molecular Function: transcription regulatory region sequence-specific DNA binding (GO:0000976);; Molecular Function: RNA polymerase II regulatory region sequence-specific DNA binding (GO:0000977);; Molecular Function: RNA polymerase II transcription factor activity, sequence-specific DNA binding (GO:0000981);; Cellular Component: nucleus (GO:0005634);; Molecular Function: transcription factor bin…	K09264|7.2e-133|gmx:100820061|K09264 MADS-box transcription factor, plant | (RefSeq) MADS-box transcription factor 6	--	[K]	Transcription	K-box region	Agamous-like MADS-box protein MADS3 OS=Vitis vinifera OX=29760 GN=MADS3 PE=2 SV=1	K	Transcription	MADS-box transcription factor 6 [Glycine max]	molecular function: binding (GO:0005488);; molecular function: nucleic acid binding transcription factor activity (GO:0001071);; biological process: biological regulation (GO:0065007);; cellular component: cell (GO:0005623);; cellular component: organelle (GO:0043226);; cellular component: cell part (GO:0044464)
gene-MP2	0.185092	0.141351	0.379591	12.7548	13.8142	4.89298	6.71607e-38	6.76197	up	--	--	Biological Process: reproduction (GO:0000003);; Biological Process: developmental process involved in reproduction (GO:0003006);; Cellular Component: cellular_component (GO:0005575);; Cellular Component: intracellular (GO:0005622);; Cellular Component: cell (GO:0005623);; Cellular Component: cytoplasm (GO:0005737);; Cellular Component: cytosol (GO:0005829);; Biological Process: multicellular orga…	--	--	--	--	Late embryogenesis abundant protein	Embryonic protein DC-8 OS=Daucus carota OX=4039 PE=3 SV=1	S	Function unknown	maturation polypeptide [Glycine max]	biological process: reproduction (GO:0000003);; biological process: reproductive process (GO:0022414);; biological process: developmental process (GO:0032502);; cellular component: cell (GO:0005623);; cellular component: cell part (GO:0044464);; biological process: multicellular organismal process (GO:0032501);; biological process: single-organism process (GO:0044699)
gene-LOC100778027	7.74899	9.5973	7.356	0.956934	0.272449	0.979605	1.96648e-05	-1.99247	down	--	--	Cellular Component: chloroplast (GO:0009507);; Cellular Component: integral component of membrane (GO:0016021);;	--	--	--	--	--	--	--	--	uncharacterized protein LOC100778027 isoform X1 [Glycine max]	cellular component: cell (GO:0005623);; cellular component: organelle (GO:0043226);; cellular component: cell part (GO:0044464);; cellular component: membrane (GO:0016020);; cellular component: membrane part (GO:0044425)
Glycine_max_newGene_408	1.6588	1.19359	1.94335	1.23549	1.59278	1.57143	0.000207888	1.35909	up	[P]	Inorganic ion transport and metabolism	Cellular Component: integral component of membrane (GO:0016021);;	K05389|3.3e-144|gmx:100804249|K05389 potassium channel subfamily K, other eukaryote | (RefSeq) two-pore potassium channel 3 isoform X2	--	[P]	Inorganic ion transport and metabolism	Ion channel	Two-pore potassium channel 3 OS=Arabidopsis thaliana OX=3702 GN=TPK3 PE=2 SV=1	P	Inorganic ion transport and metabolism	hypothetical protein GLYMA_05G127500 [Glycine max]	cellular component: membrane (GO:0016020);; cellular component: membrane part (GO:0044425)
gene-LOC100778046	3.97535	4.36914	4.61516	4.15325	5.79305	2.66845	0.000434511	1.45723	up	--	--	Molecular Function: actin binding (GO:0003779);;	K20478|3.4e-134|tcc:18606657|K20478 golgin subfamily B member 1 | (RefSeq) golgin subfamily B member 1	--	--	--	KIP1-like protein	COP1-interactive protein 1 OS=Arabidopsis thaliana OX=3702 GN=CIP1 PE=1 SV=1	S	Function unknown	COP1-interactive protein 1 [Glycine max]	molecular function: binding (GO:0005488)
Glycine_max_newGene_41	12.4413	40.7313	19.4512	38.2737	26.2018	180.436	9.87291e-06	2.96433	up	--	--	--	--	--	--	--	--	--	C	Energy production and conversion	hypothetical protein CR513_00089, partial [Mucuna pruriens]	--
gene-WRKY47	9.35454	10.6651	10.1664	1.19907	0.893495	1.16723	2.70719e-12	-1.74548	down	--	--	Molecular Function: transcription factor activity, sequence-specific DNA binding (GO:0003700);; Cellular Component: nucleus (GO:0005634);; Molecular Function: sequence-specific DNA binding (GO:0043565);;	K13425|5.4e-26|han:110922953|K13425 WRKY transcription factor 22 | (RefSeq) WRKY transcription factor 22-like	MAPK signaling pathway - plant (ko04016);; Plant-pathogen interaction (ko04626)	--	--	WRKY DNA -binding domain	Probable WRKY transcription factor 17 OS=Arabidopsis thaliana OX=3702 GN=WRKY17 PE=1 SV=2	K	Transcription	putative WRKY transcription factor 11 isoform A [Glycine soja]	molecular function: nucleic acid binding transcription factor activity (GO:0001071);; biological process: biological regulation (GO:0065007);; cellular component: cell (GO:0005623);; cellular component: organelle (GO:0043226);; cellular component: cell part (GO:0044464);; molecular function: binding (GO:0005488)
Glycine_max_newGene_5658	1.428	1.19691	1.21279	0.013338	0	0	5.27489e-09	-5.41117	down	--	--	Cellular Component: integral component of membrane (GO:0016021);;	--	--	--	--	--	--	--	--	hypothetical protein GLYMA_02G125800 [Glycine max]	cellular component: membrane (GO:0016020);; cellular component: membrane part (GO:0044425)
gene-LOC100801282	14.5734	18.0737	15.946	1.43862	1.06455	2.68519	1.04584e-06	-1.78057	down	--	--	Cellular Component: integral component of membrane (GO:0016021);;	--	--	--	--	Protein of unknown function (DUF1195)	--	S	Function unknown	uncharacterized protein LOC100801282 [Glycine max]	cellular component: membrane (GO:0016020);; cellular component: membrane part (GO:0044425)
gene-LOC106794334	7.53759	2.83416	7.53648	0	0	0	2.63767e-07	-6.51943	down	--	--	Cellular Component: extracellular region (GO:0005576);; Biological Process: rejection of self pollen (GO:0060320);;	--	--	--	--	Plant self-incompatibility protein S1	Self-incompatibility protein S1 OS=Papaver rhoeas OX=33128 GN=S1 PE=1 SV=1	S	Function unknown	self-incompatibility protein S1 [Glycine max]	cellular component: extracellular region (GO:0005576);; biological process: reproduction (GO:0000003);; biological process: cellular process (GO:0009987);; biological process: reproductive process (GO:0022414);; biological process: multicellular organismal process (GO:0032501);; biological process: single-organism process (GO:0044699);; biological process: multi-organism process (GO:0051704)
gene-LOC100781978	9.15316	12.4834	8.68241	0.676525	0.953975	1.35767	6.32086e-07	-1.85716	down	--	--	Molecular Function: protein kinase activity (GO:0004672);; Molecular Function: ATP binding (GO:0005524);; Cellular Component: integral component of membrane (GO:0016021);;	K13430|8.7e-32|csat:104783579|K13430 serine/threonine-protein kinase PBS1 [EC:2.7.11.1] | (RefSeq) serine/threonine-protein kinase CDG1	Plant-pathogen interaction (ko04626)	--	--	Protein tyrosine and serine/threonine kinase	Probable LRR receptor-like serine/threonine-protein kinase At1g63430 OS=Arabidopsis thaliana OX=3702 GN=At1g63430 PE=1 SV=1	T	Signal transduction mechanisms	probable LRR receptor-like serine/threonine-protein kinase At1g63430 [Glycine max]	molecular function: catalytic activity (GO:0003824);; biological process: metabolic process (GO:0008152);; biological process: cellular process (GO:0009987);; molecular function: binding (GO:0005488);; cellular component: membrane (GO:0016020);; cellular component: membrane part (GO:0044425)
gene-LOC100780764	39.7872	53.3756	41.6512	4.59189	3.12152	4.50728	2.45892e-15	-1.92272	down	[M]	Cell wall/membrane/envelope biogenesis	Molecular Function: GDP-mannose 3,5-epimerase activity (GO:0047918);; Molecular Function: NAD binding (GO:0051287);;	K10046|9.4e-225|gmx:100780764|K10046 GDP-D-mannose 3', 5'-epimerase [EC:5.1.3.18 5.1.3.-] | (RefSeq) uncharacterized protein LOC100780764	Ascorbate and aldarate metabolism (ko00053);; Amino sugar and nucleotide sugar metabolism (ko00520)	[GM]	Carbohydrate transport and metabolism;; Cell wall/membrane/envelope biogenesis	NAD dependent epimerase/dehydratase family	GDP-mannose 3,5-epimerase OS=Arabidopsis thaliana OX=3702 GN=At5g28840 PE=1 SV=1	--	--	uncharacterized protein LOC100780764 isoform X1 [Glycine max]	molecular function: catalytic activity (GO:0003824);; molecular function: binding (GO:0005488)
Glycine_max_newGene_4127	1.96682	1.80985	2.98396	0	0	0.200476	0.00280545	-3.10611	down	[HR]	Coenzyme transport and metabolism;; General function prediction only	Cellular Component: chloroplast (GO:0009507);;	--	--	[R]	General function prediction only	--	--	S	Function unknown	hypothetical protein GLYMA_02G055200 [Glycine max]	cellular component: cell (GO:0005623);; cellular component: organelle (GO:0043226);; cellular component: cell part (GO:0044464)
gene-LOC102665505	2.2571	2.84685	2.95805	0.266672	0.264208	0.385276	0.000295526	-1.6235	down	--	--	--	--	--	--	--	--	--	--	--	serine/arginine repetitive matrix protein 2 [Glycine max]	--
gene-LOC100306291	33.4644	57.7189	33.2724	9.4902	3.07961	5.57669	0.00167116	-1.36843	down	--	--	Cellular Component: photosystem II (GO:0009523);; Biological Process: photosynthesis (GO:0015979);; Cellular Component: integral component of membrane (GO:0016021);;	K22048|9.5e-30|csv:101209209|K22048 mechanosensitive ion channel protein 4/5/6/7/8/9/10 | (RefSeq) mechanosensitive ion channel protein 10	--	--	--	Photosystem II reaction centre X protein (PsbX)	--	S	Function unknown	uncharacterized protein LOC100306291 [Glycine max]	cellular component: cell (GO:0005623);; cellular component: membrane (GO:0016020);; cellular component: macromolecular complex (GO:0032991);; cellular component: membrane part (GO:0044425);; cellular component: cell part (GO:0044464);; biological process: metabolic process (GO:0008152);; biological process: cellular process (GO:0009987)
gene-LOC100784203	38.5248	39.8724	34.3804	3.33599	2.16286	7.95858	0.00025704	-1.62476	down	[CP]	Energy production and conversion;; Inorganic ion transport and metabolism	Molecular Function: magnesium ion binding (GO:0000287);; Molecular Function: inorganic diphosphatase activity (GO:0004427);; Cellular Component: cytoplasm (GO:0005737);; Biological Process: phosphate-containing compound metabolic process (GO:0006796);;	K01507|2.4e-130|gmx:100784203|K01507 inorganic pyrophosphatase [EC:3.6.1.1] | (RefSeq) soluble inorganic pyrophosphatase 4 isoform X1	Oxidative phosphorylation (ko00190)	[C]	Energy production and conversion	Inorganic pyrophosphatase	Soluble inorganic pyrophosphatase 4 OS=Arabidopsis thaliana OX=3702 GN=PPA4 PE=1 SV=1	C	Energy production and conversion	soluble inorganic pyrophosphatase 4 isoform X1 [Glycine max]	molecular function: binding (GO:0005488);; molecular function: catalytic activity (GO:0003824);; cellular component: cell (GO:0005623);; cellular component: cell part (GO:0044464);; biological process: metabolic process (GO:0008152);; biological process: cellular process (GO:0009987)
gene-LOC100803275	1.77365	1.45143	1.11959	0	0	0.011289	1.21936e-10	-5.86002	down	[T]	Signal transduction mechanisms	Molecular Function: protein serine/threonine kinase activity (GO:0004674);; Molecular Function: ATP binding (GO:0005524);; Cellular Component: plasma membrane (GO:0005886);; Biological Process: protein phosphorylation (GO:0006468);; Cellular Component: integral component of membrane (GO:0016021);; Molecular Function: ubiquitin protein ligase binding (GO:0031625);; Biological Process: recognition …	K24104|9.0e-79|thj:104799061|K24104 GPN-loop GTPase | (RefSeq) LOW QUALITY PROTEIN: uncharacterized protein LOC104799061	--	--	--	Protein tyrosine and serine/threonine kinase	G-type lectin S-receptor-like serine/threonine-protein kinase At4g27290 OS=Arabidopsis thaliana OX=3702 GN=At4g27290 PE=3 SV=4	T	Signal transduction mechanisms	G-type lectin S-receptor-like serine/threonine-protein kinase At4g27290 [Glycine max]	molecular function: catalytic activity (GO:0003824);; biological process: metabolic process (GO:0008152);; biological process: cellular process (GO:0009987);; molecular function: binding (GO:0005488);; cellular component: cell (GO:0005623);; cellular component: membrane (GO:0016020);; cellular component: cell part (GO:0044464);; cellular component: membrane part (GO:0044425);; biological process:…
gene-LOC100810029	11.4026	10.7522	11.1707	0.714437	0.29418	1.23415	6.19406e-09	-2.4186	down	--	--	Molecular Function: Rho GDP-dissociation inhibitor activity (GO:0005094);; Cellular Component: cytosol (GO:0005829);; Biological Process: Rho protein signal transduction (GO:0007266);; Cellular Component: membrane (GO:0016020);; Molecular Function: Rac GTPase binding (GO:0048365);;	K12462|6.0e-121|gmx:100810029|K12462 Rho GDP-dissociation inhibitor | (RefSeq) rho GDP-dissociation inhibitor 1	--	[T]	Signal transduction mechanisms	RHO protein GDP dissociation inhibitor	Rho GDP-dissociation inhibitor 1 OS=Arabidopsis thaliana OX=3702 GN=GDI1 PE=1 SV=1	T	Signal transduction mechanisms	rho GDP-dissociation inhibitor 1 [Glycine max]	molecular function: molecular function regulator (GO:0098772);; biological process: biological regulation (GO:0065007);; cellular component: cell (GO:0005623);; cellular component: cell part (GO:0044464);; biological process: cellular process (GO:0009987);; biological process: signaling (GO:0023052);; biological process: single-organism process (GO:0044699);; biological process: response to stimu…
gene-LOC100802980	5.5515	5.86854	6.04692	0.777372	0.876571	0.614012	5.93443e-06	-1.44205	down	[N]	Cell motility	Cellular Component: Golgi apparatus (GO:0005794);; Cellular Component: integral component of membrane (GO:0016021);; Molecular Function: transferase activity, transferring glycosyl groups (GO:0016757);;	K20887|3.5e-249|zju:107415449|K20887 xyloglucan glycosyltransferase 4 [EC:2.4.1.-] | (RefSeq) xyloglucan glycosyltransferase 4	--	--	--	Glycosyl transferase family group 2	Probable xyloglucan glycosyltransferase 12 OS=Arabidopsis thaliana OX=3702 GN=CSLC12 PE=1 SV=1	M	Cell wall/membrane/envelope biogenesis	probable xyloglucan glycosyltransferase 12 [Glycine max]	cellular component: cell (GO:0005623);; cellular component: organelle (GO:0043226);; cellular component: cell part (GO:0044464);; cellular component: membrane (GO:0016020);; cellular component: membrane part (GO:0044425);; molecular function: catalytic activity (GO:0003824)
gene-LOC100788148	5.35903	5.23729	4.94782	0.68171	0.723578	1.06942	0.00010869	-1.17383	down	[F]	Nucleotide transport and metabolism	Cellular Component: integral component of membrane (GO:0016021);; Molecular Function: transmembrane transporter activity (GO:0022857);;	K06901|0.0e+00|gmx:100788148|K06901 adenine/guanine/hypoxanthine permease | (RefSeq) adenine/guanine permease AZG1 isoform X1	--	--	--	Permease family	Adenine/guanine permease AZG1 OS=Arabidopsis thaliana OX=3702 GN=AZG1 PE=2 SV=1	S	Function unknown	adenine/guanine permease AZG1 isoform X1 [Glycine max]	cellular component: membrane (GO:0016020);; cellular component: membrane part (GO:0044425);; molecular function: transporter activity (GO:0005215);; biological process: localization (GO:0051179)
gene-LOC100798369	8.06088	4.522	8.0935	1.66669	0.882233	0.973911	0.00737779	-1.08331	down	--	--	Molecular Function: DNA binding (GO:0003677);; Molecular Function: transcription factor activity, sequence-specific DNA binding (GO:0003700);; Cellular Component: nucleus (GO:0005634);;	K09286|4.6e-27|ini:109164194|K09286 EREBP-like factor | (RefSeq) ethylene-responsive transcription factor 3-like	--	--	--	AP2 domain	Ethylene-responsive transcription factor 12 OS=Arabidopsis thaliana OX=3702 GN=ERF12 PE=1 SV=1	K	Transcription	ethylene-responsive transcription factor 12 [Glycine max]	molecular function: binding (GO:0005488);; molecular function: nucleic acid binding transcription factor activity (GO:0001071);; biological process: biological regulation (GO:0065007);; cellular component: cell (GO:0005623);; cellular component: organelle (GO:0043226);; cellular component: cell part (GO:0044464)
gene-LOC100798684	10.4682	7.81527	10.4036	17.7512	21.1177	11.5515	9.95331e-11	2.29425	up	[J]	Translation, ribosomal structure and biogenesis	Molecular Function: RNA binding (GO:0003723);; Molecular Function: helicase activity (GO:0004386);; Molecular Function: ATP binding (GO:0005524);; Cellular Component: nucleus (GO:0005634);;	K14442|0.0e+00|gmx:100798684|K14442 ATP-dependent RNA helicase DHX36 [EC:3.6.4.13] | (RefSeq) DExH-box ATP-dependent RNA helicase DExH5, mitochondrial isoform X1	RNA degradation (ko03018)	[A]	RNA processing and modification	Helicase associated domain (HA2)	DExH-box ATP-dependent RNA helicase DExH5, mitochondrial OS=Arabidopsis thaliana OX=3702 GN=At2g01130 PE=3 SV=1	A	RNA processing and modification	DExH-box ATP-dependent RNA helicase DExH5, mitochondrial-like [Glycine soja]	molecular function: binding (GO:0005488);; molecular function: catalytic activity (GO:0003824);; cellular component: cell (GO:0005623);; cellular component: organelle (GO:0043226);; cellular component: cell part (GO:0044464)
gene-LOC100786500	7.452	8.04249	5.44948	0.563486	0.96431	0.649743	7.68789e-05	-1.72616	down	--	--	--	--	--	--	--	Phosphate-induced protein 1 conserved region	Protein EXORDIUM-like 5 OS=Arabidopsis thaliana OX=3702 GN=EXL5 PE=2 SV=1	S	Function unknown	protein EXORDIUM-like 5 [Glycine max]	--
gene-LOC100807439	58.9504	70.7357	58.9467	9.25742	5.89426	10.8457	4.38938e-09	-1.42859	down	--	--	Molecular Function: oxoglutarate:malate antiporter activity (GO:0015367);; Cellular Component: integral component of membrane (GO:0016021);;	K15104|6.9e-170|gmx:100807439|K15104 solute carrier family 25 (mitochondrial oxoglutarate transporter), member 11 | (RefSeq) mitochondrial dicarboxylate/tricarboxylate transporter DTC	--	[C]	Energy production and conversion	Mitochondrial carrier protein	Mitochondrial dicarboxylate/tricarboxylate transporter DTC OS=Arabidopsis thaliana OX=3702 GN=DTC PE=1 SV=1	C	Energy production and conversion	mitochondrial dicarboxylate/tricarboxylate transporter DTC [Glycine max]	molecular function: transporter activity (GO:0005215);; biological process: single-organism process (GO:0044699);; biological process: localization (GO:0051179);; cellular component: membrane (GO:0016020);; cellular component: membrane part (GO:0044425)
gene-WRKY42	12.3579	12.614	11.7117	1.87563	1.32327	1.04931	1.95124e-07	-1.63622	down	--	--	Molecular Function: transcription factor activity, sequence-specific DNA binding (GO:0003700);; Cellular Component: nucleus (GO:0005634);; Molecular Function: sequence-specific DNA binding (GO:0043565);;	K13425|5.9e-25|han:110922953|K13425 WRKY transcription factor 22 | (RefSeq) WRKY transcription factor 22-like	MAPK signaling pathway - plant (ko04016);; Plant-pathogen interaction (ko04626)	--	--	WRKY DNA -binding domain	Probable WRKY transcription factor 17 OS=Arabidopsis thaliana OX=3702 GN=WRKY17 PE=1 SV=2	K	Transcription	WRKY transcription factor 42 [Glycine max]	molecular function: nucleic acid binding transcription factor activity (GO:0001071);; biological process: biological regulation (GO:0065007);; cellular component: cell (GO:0005623);; cellular component: organelle (GO:0043226);; cellular component: cell part (GO:0044464);; molecular function: binding (GO:0005488)
gene-LOC100037473	2.07482	4.53525	2.29153	0	0	0	9.02242e-11	-7.6608	down	--	--	Molecular Function: catechol oxidase activity (GO:0004097);; Biological Process: pigment biosynthetic process (GO:0046148);; Molecular Function: metal ion binding (GO:0046872);;	K00422|0.0e+00|gmx:100037473|K00422 polyphenol oxidase [EC:1.10.3.1] | (RefSeq) polyphenol oxidase A1, chloroplastic	Tyrosine metabolism (ko00350);; Isoquinoline alkaloid biosynthesis (ko00950)	--	--	Protein of unknown function (DUF_B2219)	Polyphenol oxidase, chloroplastic OS=Malus domestica OX=3750 PE=1 SV=1	S	Function unknown	polyphenol oxidase A1, chloroplastic [Glycine max]	molecular function: catalytic activity (GO:0003824);; biological process: metabolic process (GO:0008152);; biological process: single-organism process (GO:0044699);; molecular function: binding (GO:0005488)
gene-LOC100808127	4.07506	5.1433	3.51266	0	0.085294	0.162445	1.43485e-08	-3.94173	down	--	--	Cellular Component: early endosome (GO:0005769);; Cellular Component: plasma membrane (GO:0005886);; Molecular Function: magnesium ion transmembrane transporter activity (GO:0015095);; Biological Process: magnesium ion transport (GO:0015693);; Cellular Component: membrane (GO:0016020);; Cellular Component: integral component of membrane (GO:0016021);;	K22733|1.4e-196|gmx:100808127|K22733 magnesium transporter | (RefSeq) probable magnesium transporter NIPA6	--	[S]	Function unknown	Magnesium transporter NIPA	Probable magnesium transporter NIPA6 OS=Arabidopsis thaliana OX=3702 GN=At2g21120 PE=2 SV=1	P	Inorganic ion transport and metabolism	probable magnesium transporter NIPA6 [Glycine max]	cellular component: cell (GO:0005623);; cellular component: organelle (GO:0043226);; cellular component: cell part (GO:0044464);; cellular component: membrane (GO:0016020);; molecular function: transporter activity (GO:0005215);; biological process: localization (GO:0051179);; cellular component: membrane part (GO:0044425)
gene-LOC102660030	0.079248	1.2997	0.089926	1.41251	1.28987	1.27407	0.00756947	2.54383	up	--	--	--	--	--	--	--	--	--	--	--	uncharacterized protein LOC102660030 [Glycine max]	--
gene-LOC100811896	0.926392	1.43482	1.29434	0.047996	0	0.032009	2.81522e-08	-3.838	down	[T]	Signal transduction mechanisms	Molecular Function: protein serine/threonine kinase activity (GO:0004674);; Molecular Function: ATP binding (GO:0005524);; Cellular Component: plasma membrane (GO:0005886);; Biological Process: protein phosphorylation (GO:0006468);; Cellular Component: integral component of membrane (GO:0016021);; Biological Process: recognition of pollen (GO:0048544);;	K24104|1.0e-72|thj:104799061|K24104 GPN-loop GTPase | (RefSeq) LOW QUALITY PROTEIN: uncharacterized protein LOC104799061	--	--	--	Protein tyrosine and serine/threonine kinase	G-type lectin S-receptor-like serine/threonine-protein kinase At1g11300 OS=Arabidopsis thaliana OX=3702 GN=At1g11300 PE=2 SV=1	T	Signal transduction mechanisms	G-type lectin S-receptor-like serine/threonine-protein kinase At1g11300 isoform X1 [Glycine max]	molecular function: catalytic activity (GO:0003824);; biological process: metabolic process (GO:0008152);; biological process: cellular process (GO:0009987);; molecular function: binding (GO:0005488);; cellular component: cell (GO:0005623);; cellular component: membrane (GO:0016020);; cellular component: cell part (GO:0044464);; cellular component: membrane part (GO:0044425);; biological process:…
gene-LOC100775376	5.50442	12.3606	5.41584	0.247965	0.094613	0.074765	9.2449e-15	-4.24625	down	[IR]	Lipid transport and metabolism;; General function prediction only	Cellular Component: integral component of membrane (GO:0016021);; Molecular Function: long-chain-alcohol oxidase activity (GO:0046577);; Molecular Function: flavin adenine dinucleotide binding (GO:0050660);;	K17756|0.0e+00|gmx:100775376|K17756 long-chain-alcohol oxidase [EC:1.1.3.20] | (RefSeq) long-chain-alcohol oxidase FAO4A	--	--	--	GMC oxidoreductase	Long-chain-alcohol oxidase FAO4A OS=Arabidopsis thaliana OX=3702 GN=FAO4A PE=3 SV=2	E	Amino acid transport and metabolism	long-chain-alcohol oxidase FAO4A [Glycine max]	cellular component: membrane (GO:0016020);; cellular component: membrane part (GO:0044425);; molecular function: catalytic activity (GO:0003824);; biological process: metabolic process (GO:0008152);; biological process: single-organism process (GO:0044699);; molecular function: binding (GO:0005488)
gene-LOC100808013	6.37556	5.61989	6.19904	4.76013	6.10888	4.08263	0.000293079	1.20561	up	--	--	Molecular Function: RNA binding (GO:0003723);;	K01148|1.3e-21|pxb:103940831|K01148 poly(A)-specific ribonuclease [EC:3.1.13.4] | (RefSeq) uncharacterized CRM domain-containing protein At3g25440, chloroplastic-like isoform X1	RNA degradation (ko03018)	[L]	Replication, recombination and repair	CRS1 / YhbY (CRM) domain	CRM-domain containing factor CFM3, chloroplastic/mitochondrial OS=Zea mays OX=4577 GN=CFM3 PE=1 SV=1	L	Replication, recombination and repair	CRM-domain containing factor CFM3, chloroplastic/mitochondrial [Glycine max]	molecular function: binding (GO:0005488)
gene-LOC100808129	9.48983	8.09348	10.579	1.79286	0.634749	1.2887	4.70236e-06	-1.50648	down	--	--	--	--	--	--	--	--	--	S	Function unknown	uncharacterized protein LOC100808129 isoform X1 [Glycine max]	--
gene-LOC100814598	21.0534	31.0726	20.2555	0.672207	1.00599	0.385067	6.91533e-15	-3.53252	down	--	--	--	K22911|5.7e-30|psom:113299743|K22911 thiamine phosphate phosphatase / amino-HMP aminohydrolase [EC:3.1.3.100 3.5.99.-] | (RefSeq) bifunctional TH2 protein, mitochondrial-like	Thiamine metabolism (ko00730)	--	--	--	--	--	--	uncharacterized protein LOC100814598 [Glycine max]	--
gene-LOC100779200	1.43897	1.18264	1.41393	0.992908	1.05938	1.06128	0.000164717	1.09445	up	--	--	--	--	--	--	--	PPR repeat family	--	S	Function unknown	putative pentatricopeptide repeat-containing protein At3g16710, mitochondrial isoform X1 [Glycine max]	--
gene-LOC100777331	4.91639	6.55465	5.48128	24.0402	13.8357	20.6382	3.65076e-39	3.18382	up	--	--	Cellular Component: integral component of membrane (GO:0016021);;	--	--	--	--	Protein of unknown function (DUF1084)	Tobamovirus multiplication protein 1 OS=Nicotiana tabacum OX=4097 GN=TOM1 PE=1 SV=1	S	Function unknown	tobamovirus multiplication protein 1 isoform X1 [Glycine max]	cellular component: membrane (GO:0016020);; cellular component: membrane part (GO:0044425)
gene-LOC100527679	1.87189	1.79708	2.4986	3.08866	1.8576	2.45082	2.84132e-07	1.68714	up	[G]	Carbohydrate transport and metabolism	Molecular Function: monooxygenase activity (GO:0004497);; Cellular Component: plastid (GO:0009536);; Biological Process: photorespiration (GO:0009853);; Biological Process: carbon fixation (GO:0015977);; Biological Process: photosynthesis (GO:0015979);; Molecular Function: ribulose-bisphosphate carboxylase activity (GO:0016984);;	K01602|1.1e-100|gmx:100527679|K01602 ribulose-bisphosphate carboxylase small chain [EC:4.1.1.39] | (RefSeq) putative ribulose bisphosphate carboxylase small chain	Glyoxylate and dicarboxylate metabolism (ko00630);; Carbon fixation in photosynthetic organisms (ko00710);; Carbon metabolism (ko01200)	--	--	Ribulose bisphosphate carboxylase, small chain	Ribulose bisphosphate carboxylase small chain, chloroplastic OS=Marchantia paleacea OX=56867 GN=RBCS PE=2 SV=1	E	Amino acid transport and metabolism	putative ribulose bisphosphate carboxylase small chain [Glycine max]	molecular function: catalytic activity (GO:0003824);; biological process: metabolic process (GO:0008152);; biological process: single-organism process (GO:0044699);; cellular component: cell (GO:0005623);; cellular component: organelle (GO:0043226);; cellular component: cell part (GO:0044464);; biological process: cellular process (GO:0009987)
gene-LOC100812335	1.36475	3.41464	1.63679	0	0	0	1.32698e-07	-6.64373	down	--	--	Molecular Function: electron carrier activity (GO:0009055);; Molecular Function: protein disulfide oxidoreductase activity (GO:0015035);;	K17479|1.4e-155|gmx:100812335|K17479 glutaredoxin domain-containing cysteine-rich protein 1 | (RefSeq) uncharacterized protein At5g39865	--	[O]	Posttranslational modification, protein turnover, chaperones	Glutaredoxin	Uncharacterized protein At5g39865 OS=Arabidopsis thaliana OX=3702 GN=At5g39865 PE=2 SV=1	O	Posttranslational modification, protein turnover, chaperones	uncharacterized protein At5g39865 [Glycine max]	molecular function: electron carrier activity (GO:0009055);; molecular function: catalytic activity (GO:0003824);; biological process: metabolic process (GO:0008152);; biological process: single-organism process (GO:0044699)
gene-LOC100789619	2.29857	3.31984	2.18584	0.372655	0.25671	0.496874	0.00384621	-1.32406	down	[FR]	Nucleotide transport and metabolism;; General function prediction only	Molecular Function: 5'-deoxynucleotidase activity (GO:0002953);; Cellular Component: cytoplasm (GO:0005737);;	K07023|1.1e-144|gmx:100789619|K07023 putative hydrolases of HD superfamily | (RefSeq) HD domain-containing protein C4G3.17	--	[R]	General function prediction only	HD domain	--	S	Function unknown	HD domain-containing protein C4G3.17 [Glycine max]	molecular function: catalytic activity (GO:0003824);; biological process: metabolic process (GO:0008152);; biological process: cellular process (GO:0009987);; cellular component: cell (GO:0005623);; cellular component: cell part (GO:0044464)
gene-LOC100788498	13.9082	17.609	14.4396	1.18198	1.42696	0.512052	4.2069e-07	-2.27939	down	--	--	Molecular Function: microtubule motor activity (GO:0003777);; Molecular Function: ATP binding (GO:0005524);; Cellular Component: kinesin complex (GO:0005871);; Cellular Component: microtubule (GO:0005874);; Biological Process: microtubule-based movement (GO:0007018);; Biological Process: mitotic spindle organization (GO:0007052);; Molecular Function: microtubule binding (GO:0008017);; Molecular F…	K18806|2.8e-85|mis:MICPUN_63076|K18806 kinesin family member 7 | (RefSeq) predicted protein	--	[Z]	Cytoskeleton	Kinesin motor domain	Kinesin-like protein KIN-4A OS=Gossypium hirsutum OX=3635 GN=KIN4A PE=2 SV=1	Z	Cytoskeleton	kinesin-like protein KIN-4A isoform X1 [Glycine max]	molecular function: catalytic activity (GO:0003824);; molecular function: binding (GO:0005488);; cellular component: cell (GO:0005623);; cellular component: macromolecular complex (GO:0032991);; cellular component: organelle (GO:0043226);; cellular component: organelle part (GO:0044422);; cellular component: cell part (GO:0044464);; cellular component: supramolecular complex (GO:0099080);; biolog…
gene-LOC100798116	13.7745	16.8485	16.7023	12.6969	9.31761	19.9965	0.000128246	1.23988	up	--	--	Cellular Component: integral component of membrane (GO:0016021);;	--	--	--	--	Oligosaccaryltransferase	Dolichyl-diphosphooligosaccharide--protein glycosyltransferase subunit 4A OS=Oryza sativa subsp. japonica OX=39947 GN=OST4A PE=3 SV=1	S	Function unknown	dolichyl-diphosphooligosaccharide--protein glycosyltransferase subunit 4A [Glycine max]	cellular component: membrane (GO:0016020);; cellular component: membrane part (GO:0044425)
gene-LOC100807864	16.9946	8.94379	15.588	9.17233	10.1488	14.3173	0.000562495	1.1566	up	[G]	Carbohydrate transport and metabolism	Molecular Function: magnesium ion binding (GO:0000287);; Molecular Function: pyruvate kinase activity (GO:0004743);; Cellular Component: cytoplasm (GO:0005737);; Biological Process: glycolytic process (GO:0006096);; Molecular Function: kinase activity (GO:0016301);; Molecular Function: potassium ion binding (GO:0030955);;	K00873|1.2e-297|gmx:100807864|K00873 pyruvate kinase [EC:2.7.1.40] | (RefSeq) pyruvate kinase 1, cytosolic	Glycolysis / Gluconeogenesis (ko00010);; Purine metabolism (ko00230);; Pyruvate metabolism (ko00620);; Carbon metabolism (ko01200);; Biosynthesis of amino acids (ko01230)	[G]	Carbohydrate transport and metabolism	Pyruvate kinase, barrel domain	Pyruvate kinase 1, cytosolic OS=Oryza sativa subsp. indica OX=39946 GN=OsI_35105 PE=3 SV=1	G	Carbohydrate transport and metabolism	pyruvate kinase 1, cytosolic [Glycine max]	molecular function: binding (GO:0005488);; molecular function: catalytic activity (GO:0003824);; cellular component: cell (GO:0005623);; cellular component: cell part (GO:0044464);; biological process: metabolic process (GO:0008152);; biological process: cellular process (GO:0009987);; biological process: single-organism process (GO:0044699)
gene-LOC100793851	7.34839	10.2137	7.88838	0.896329	0.454118	1.88992	0.00123808	-1.54282	down	[M]	Cell wall/membrane/envelope biogenesis	Biological Process: spliceosomal complex assembly (GO:0000245);; Molecular Function: MAP kinase activity (GO:0004707);; Molecular Function: ATP binding (GO:0005524);; Cellular Component: nucleus (GO:0005634);; Cellular Component: cytoplasm (GO:0005737);; Biological Process: regulation of gene expression (GO:0010468);; Biological Process: intracellular signal transduction (GO:0035556);; Biological…	K08832|1.3e-260|gmx:100793851|K08832 serine/threonine-protein kinase SRPK3 [EC:2.7.11.1] | (RefSeq) SRSF protein kinase 1	--	[T]	Signal transduction mechanisms	Protein kinase domain	Serine/threonine-protein kinase AFC2 OS=Arabidopsis thaliana OX=3702 GN=AFC2 PE=1 SV=1	T	Signal transduction mechanisms	SRSF protein kinase 1 [Glycine max]	biological process: cellular process (GO:0009987);; biological process: cellular component organization or biogenesis (GO:0071840);; molecular function: catalytic activity (GO:0003824);; molecular function: signal transducer activity (GO:0004871);; biological process: metabolic process (GO:0008152);; biological process: signaling (GO:0023052);; biological process: single-organism process (GO:0044…
gene-LOC100789150	2.57438	3.32054	2.71987	0.320337	0.119779	0.588662	0.00316896	-1.58942	down	[G]	Carbohydrate transport and metabolism	Cellular Component: endoplasmic reticulum (GO:0005783);; Biological Process: biosynthetic process (GO:0009058);; Molecular Function: strictosidine synthase activity (GO:0016844);;	K01757|1.6e-54|crb:111828550|K01757 strictosidine synthase [EC:4.3.3.2] | (RefSeq) protein STRICTOSIDINE SYNTHASE-LIKE 12-like	Indole alkaloid biosynthesis (ko00901)	[R]	General function prediction only	Strictosidine synthase	Protein STRICTOSIDINE SYNTHASE-LIKE 2 OS=Arabidopsis thaliana OX=3702 GN=SSL2 PE=2 SV=1	J	Translation, ribosomal structure and biogenesis	protein STRICTOSIDINE SYNTHASE-LIKE 2 [Glycine max]	cellular component: cell (GO:0005623);; cellular component: organelle (GO:0043226);; cellular component: cell part (GO:0044464);; biological process: metabolic process (GO:0008152);; molecular function: catalytic activity (GO:0003824)
gene-LOC100786373	15.4745	12.8374	16.9294	13.1867	10.9536	15.1401	1.54258e-09	1.28231	up	--	--	Biological Process: ubiquitin-dependent protein catabolic process (GO:0006511);; Molecular Function: ubiquitin-like protein conjugating enzyme binding (GO:0044390);; Molecular Function: metal ion binding (GO:0046872);; Molecular Function: ubiquitin protein ligase activity (GO:0061630);; Biological Process: ER-associated misfolded protein catabolic process (GO:0071712);;	K10666|4.6e-140|gmx:100786373|K10666 E3 ubiquitin-protein ligase RNF5 [EC:2.3.2.27] | (RefSeq) uncharacterized protein LOC100786373	Protein processing in endoplasmic reticulum (ko04141)	[O]	Posttranslational modification, protein turnover, chaperones	Zinc finger, C3HC4 type (RING finger)	E3 ubiquitin-protein ligase RMA1H1 OS=Capsicum annuum OX=4072 GN=RMA1H1 PE=1 SV=1	O	Posttranslational modification, protein turnover, chaperones	uncharacterized protein LOC100786373 [Glycine max]	biological process: metabolic process (GO:0008152);; biological process: cellular process (GO:0009987);; molecular function: binding (GO:0005488);; molecular function: catalytic activity (GO:0003824);; biological process: single-organism process (GO:0044699);; biological process: response to stimulus (GO:0050896)
Glycine_max_newGene_1132	2.01686	1.21787	2.66478	0.100449	0.069952	0.088863	1.91954e-06	-2.5321	down	--	--	Molecular Function: 3-hydroxyacyl-CoA dehydrogenase activity (GO:0003857);; Biological Process: fatty acid metabolic process (GO:0006631);;	--	--	--	--	--	--	--	--	unknown [Glycine max]	molecular function: catalytic activity (GO:0003824);; biological process: metabolic process (GO:0008152);; biological process: single-organism process (GO:0044699);; biological process: cellular process (GO:0009987)
gene-LOC100802730	7.67364	11.1519	8.97102	31.9758	21.9388	23.7563	4.78156e-30	2.89888	up	[G]	Carbohydrate transport and metabolism	Molecular Function: magnesium ion binding (GO:0000287);; Molecular Function: phosphoglucomutase activity (GO:0004614);; Cellular Component: cytosol (GO:0005829);; Biological Process: carbohydrate metabolic process (GO:0005975);;	K01835|0.0e+00|gmx:100802730|K01835 phosphoglucomutase [EC:5.4.2.2] | (RefSeq) phosphoglucomutase, chloroplastic	Glycolysis / Gluconeogenesis (ko00010);; Pentose phosphate pathway (ko00030);; Galactose metabolism (ko00052);; Purine metabolism (ko00230);; Starch and sucrose metabolism (ko00500);; Amino sugar and nucleotide sugar metabolism (ko00520)	[G]	Carbohydrate transport and metabolism	Phosphoglucomutase/phosphomannomutase, alpha/beta/alpha domain I	Phosphoglucomutase, chloroplastic OS=Pisum sativum OX=3888 GN=PGMP PE=2 SV=1	G	Carbohydrate transport and metabolism	phosphoglucomutase, chloroplastic [Glycine max]	molecular function: binding (GO:0005488);; molecular function: catalytic activity (GO:0003824);; cellular component: cell (GO:0005623);; cellular component: cell part (GO:0044464);; biological process: metabolic process (GO:0008152)
gene-LOC100801350	1.01524	0.890302	0.626467	0.024895	0	0.015465	1.49934e-05	-3.87143	down	--	--	Cellular Component: ubiquitin ligase complex (GO:0000151);; Biological Process: protein polyubiquitination (GO:0000209);; Cellular Component: cytoplasm (GO:0005737);; Biological Process: ubiquitin-dependent protein catabolic process (GO:0006511);; Cellular Component: integral component of membrane (GO:0016021);; Molecular Function: ubiquitin conjugating enzyme binding (GO:0031624);; Biological Pr…	K11968|0.0e+00|gmx:100801350|K11968 ariadne-1 [EC:2.3.2.31] | (RefSeq) probable E3 ubiquitin-protein ligase ARI8	--	[O]	Posttranslational modification, protein turnover, chaperones	IBR domain, a half RING-finger domain	Probable E3 ubiquitin-protein ligase ARI8 OS=Arabidopsis thaliana OX=3702 GN=ARI8 PE=2 SV=1	O	Posttranslational modification, protein turnover, chaperones	probable E3 ubiquitin-protein ligase ARI8 [Glycine max]	cellular component: cell (GO:0005623);; cellular component: macromolecular complex (GO:0032991);; cellular component: cell part (GO:0044464);; biological process: metabolic process (GO:0008152);; biological process: cellular process (GO:0009987);; cellular component: membrane (GO:0016020);; cellular component: membrane part (GO:0044425);; molecular function: binding (GO:0005488);; biological proc…
gene-LOC100779679	24.1792	17.7166	24.5485	4.32702	2.46009	3.62489	2.103e-07	-1.22838	down	[I]	Lipid transport and metabolism	Molecular Function: enoyl-[acyl-carrier-protein] reductase (NADH) activity (GO:0004318);; Biological Process: fatty acid biosynthetic process (GO:0006633);;	K00208|1.8e-218|gmx:100779679|K00208 enoyl-[acyl-carrier protein] reductase I [EC:1.3.1.9 1.3.1.10] | (RefSeq) enoyl-[acyl-carrier-protein] reductase [NADH], chloroplastic	Fatty acid biosynthesis (ko00061);; Biotin metabolism (ko00780);; Fatty acid metabolism (ko01212)	[R]	General function prediction only	Enoyl-(Acyl carrier protein) reductase	Enoyl-[acyl-carrier-protein] reductase [NADH], chloroplastic OS=Brassica napus OX=3708 PE=1 SV=2	Q	Secondary metabolites biosynthesis, transport and catabolism	hypothetical protein GLYMA_18G156100 [Glycine max]	molecular function: catalytic activity (GO:0003824);; biological process: metabolic process (GO:0008152);; biological process: single-organism process (GO:0044699);; biological process: cellular process (GO:0009987)
gene-SBPRP	100.928	293.156	105.643	10.8402	5.38846	6.44776	5.90305e-10	-2.9924	down	--	--	--	K11855|9.7e-17|bvg:104906049|K11855 ubiquitin carboxyl-terminal hydrolase 36/42 [EC:3.4.19.12] | (RefSeq) ubiquitin carboxyl-terminal hydrolase 36	--	--	--	Hydrophobic seed protein	14 kDa proline-rich protein DC2.15 OS=Daucus carota OX=4039 PE=2 SV=1	S	Function unknown	proline-rich protein precursor [Glycine max]	--
gene-LOC100810342	0.936636	0.900197	0.884532	0	0	0	2.96527e-05	-5.59839	down	--	--	Cellular Component: Golgi apparatus (GO:0005794);; Molecular Function: O-acetyltransferase activity (GO:0016413);;	K23877|2.0e-33|mesc:110610356|K23877 xyloglucan O-acetyltransferase | (RefSeq) protein ALTERED XYLOGLUCAN 4-like	--	--	--	GDSL/SGNH-like Acyl-Esterase family found in Pmr5 and Cas1p	Protein trichome birefringence-like 43 OS=Arabidopsis thaliana OX=3702 GN=TBL43 PE=2 SV=1	S	Function unknown	protein trichome birefringence-like 43 [Glycine max]	cellular component: cell (GO:0005623);; cellular component: organelle (GO:0043226);; cellular component: cell part (GO:0044464);; molecular function: catalytic activity (GO:0003824)
gene-LOC100784391	2.03529	2.90575	1.90809	0.039501	0.03144	0.247032	2.95437e-05	-2.83138	down	[E]	Amino acid transport and metabolism	Cellular Component: plasma membrane (GO:0005886);; Molecular Function: urea transmembrane transporter activity (GO:0015204);; Cellular Component: integral component of membrane (GO:0016021);; Biological Process: urea transmembrane transport (GO:0071918);;	K20989|0.0e+00|gmx:100784391|K20989 urea-proton symporter | (RefSeq) urea-proton symporter DUR3	--	[E]	Amino acid transport and metabolism	Sodium:solute symporter family	Urea-proton symporter DUR3 OS=Arabidopsis thaliana OX=3702 GN=DUR3 PE=1 SV=1	E	Amino acid transport and metabolism	urea-proton symporter DUR3 [Glycine max]	cellular component: cell (GO:0005623);; cellular component: membrane (GO:0016020);; cellular component: cell part (GO:0044464);; molecular function: transporter activity (GO:0005215);; biological process: localization (GO:0051179);; cellular component: membrane part (GO:0044425);; biological process: single-organism process (GO:0044699)
gene-LOC100808701	4.8511	3.56426	4.4019	53.6569	32.2787	60.0233	2.33341e-100	4.90472	up	--	--	Cellular Component: integral component of membrane (GO:0016021);;	K17279|1.4e-95|gmx:100808701|K17279 receptor expression-enhancing protein 5/6 | (RefSeq) HVA22-like protein a	--	[U]	Intracellular trafficking, secretion, and vesicular transport	TB2/DP1, HVA22 family	HVA22-like protein a OS=Arabidopsis thaliana OX=3702 GN=HVA22A PE=2 SV=1	U	Intracellular trafficking, secretion, and vesicular transport	HVA22-like protein a [Glycine max]	cellular component: membrane (GO:0016020);; cellular component: membrane part (GO:0044425)
gene-LOC100815777	0	0	0	5.09846	2.1501	2.87363	2.17229e-16	9.04298	up	--	--	Molecular Function: DNA binding (GO:0003677);; Cellular Component: nucleus (GO:0005634);; Biological Process: regulation of transcription, DNA-templated (GO:0006355);;	--	--	--	--	No apical meristem (NAM) protein	NAC domain-containing protein 104 OS=Arabidopsis thaliana OX=3702 GN=NAC104 PE=2 SV=1	K	Transcription	NAC domain-containing protein 104 isoform X1 [Glycine max]	molecular function: binding (GO:0005488);; cellular component: cell (GO:0005623);; cellular component: organelle (GO:0043226);; cellular component: cell part (GO:0044464);; biological process: biological regulation (GO:0065007)
gene-LOC100814531	7.27869	3.86548	6.31917	0.898906	0.614819	0.945653	4.6027e-05	-1.35551	down	[T]	Signal transduction mechanisms	Molecular Function: acid phosphatase activity (GO:0003993);; Molecular Function: metal ion binding (GO:0046872);;	K22390|0.0e+00|gmx:100814531|K22390 acid phosphatase type 7 | (RefSeq) probable inactive purple acid phosphatase 27-like precursor	--	[G]	Carbohydrate transport and metabolism	Fn3-like domain from Purple Acid Phosphatase	Probable inactive purple acid phosphatase 27 OS=Arabidopsis thaliana OX=3702 GN=PAP27 PE=2 SV=1	G	Carbohydrate transport and metabolism	probable inactive purple acid phosphatase 27-like isoform X1 [Glycine max]	molecular function: catalytic activity (GO:0003824);; biological process: metabolic process (GO:0008152);; biological process: cellular process (GO:0009987);; molecular function: binding (GO:0005488)
gene-LOC100775955	0.69592	0.629517	0.582549	1.10213	1.34912	1.40756	2.80153e-14	2.45908	up	[MR]	Cell wall/membrane/envelope biogenesis;; General function prediction only	Molecular Function: ATP binding (GO:0005524);; Molecular Function: D-alanine-D-alanine ligase activity (GO:0008716);; Cellular Component: chloroplast (GO:0009507);; Molecular Function: metal ion binding (GO:0046872);;	--	--	--	--	D-ala D-ala ligase N-terminus	--	F	Nucleotide transport and metabolism	uncharacterized protein LOC100775955 [Glycine max]	molecular function: binding (GO:0005488);; molecular function: catalytic activity (GO:0003824);; cellular component: cell (GO:0005623);; cellular component: organelle (GO:0043226);; cellular component: cell part (GO:0044464)
gene-LOC100809648	3.43931	5.59415	3.64139	0	0.123167	0.032916	5.6577e-09	-4.33988	down	--	--	Cellular Component: Golgi apparatus (GO:0005794);; Biological Process: xyloglucan metabolic process (GO:0010411);; Cellular Component: integral component of membrane (GO:0016021);; Molecular Function: O-acetyltransferase activity (GO:0016413);;	K23877|6.0e-191|gmx:100809774|K23877 xyloglucan O-acetyltransferase | (RefSeq) protein ALTERED XYLOGLUCAN 4	--	--	--	GDSL/SGNH-like Acyl-Esterase family found in Pmr5 and Cas1p	Protein ALTERED XYLOGLUCAN 4 OS=Arabidopsis thaliana OX=3702 GN=AXY4 PE=1 SV=1	S	Function unknown	protein ALTERED XYLOGLUCAN 4 isoform X2 [Glycine max]	cellular component: cell (GO:0005623);; cellular component: organelle (GO:0043226);; cellular component: cell part (GO:0044464);; biological process: metabolic process (GO:0008152);; biological process: cellular process (GO:0009987);; cellular component: membrane (GO:0016020);; cellular component: membrane part (GO:0044425);; molecular function: catalytic activity (GO:0003824)
gene-LOC100820233	21.8079	27.3376	21.1923	4.37097	1.77669	4.04097	1.17575e-06	-1.48138	down	--	--	Molecular Function: transferase activity (GO:0016740);;	K20782|1.2e-216|gmx:100820233|K20782 hydroxyproline O-arabinosyltransferase [EC:2.4.2.58] | (RefSeq) uncharacterized protein LOC100820233 precursor	Other types of O-glycan biosynthesis (ko00514)	--	--	--	Hydroxyproline O-arabinosyltransferase RDN2 OS=Medicago truncatula OX=3880 GN=RDN2 PE=3 SV=1	S	Function unknown	uncharacterized protein LOC100820233 precursor [Glycine max]	molecular function: catalytic activity (GO:0003824)
gene-LOC102661364	2.71952	1.49611	2.16784	2.09055	1.31519	2.20785	0.000614291	1.24635	up	--	--	Molecular Function: molecular_function (GO:0003674);; Molecular Function: nucleic acid binding (GO:0003676);; Molecular Function: RNA binding (GO:0003723);; Molecular Function: binding (GO:0005488);; Molecular Function: protein binding (GO:0005515);; Biological Process: multicellular organism development (GO:0007275);; Biological Process: determination of left/right symmetry (GO:0007368);; Biolog…	K15340|1.1e-06|pvu:PHAVU_009G084300g|K15340 DNA cross-link repair 1A protein | (RefSeq) hypothetical protein	--	[A]	RNA processing and modification	SAM domain (Sterile alpha motif)	--	A	RNA processing and modification	protein bicaudal C homolog 1 [Glycine max]	molecular function: binding (GO:0005488);; biological process: multicellular organismal process (GO:0032501);; biological process: developmental process (GO:0032502);; biological process: single-organism process (GO:0044699);; biological process: biological regulation (GO:0065007)
gene-LOC100797243	3.0793	2.43092	2.38843	0.154114	0.182885	0.164337	5.99849e-09	-2.44071	down	--	--	Cellular Component: spindle (GO:0005819);; Cellular Component: microtubule (GO:0005874);; Biological Process: activation of protein kinase activity (GO:0032147);; Biological Process: regulation of mitotic spindle organization (GO:0060236);;	K16812|8.6e-21|atr:18448126|K16812 targeting protein for Xklp2 | (RefSeq) protein TPX2	--	--	--	Targeting protein for Xklp2 (TPX2) domain	--	S	Function unknown	uncharacterized protein LOC100797243 [Glycine max]	cellular component: cell (GO:0005623);; cellular component: organelle (GO:0043226);; cellular component: organelle part (GO:0044422);; cellular component: cell part (GO:0044464);; cellular component: supramolecular complex (GO:0099080);; biological process: biological regulation (GO:0065007)
gene-LOC100789654	0.366918	1.62376	0.381719	0.056076	0.051471	0.07155	0.00991275	-2.09513	down	--	--	Cellular Component: cytoplasm (GO:0005737);; Cellular Component: endosome (GO:0005768);; Cellular Component: trans-Golgi network (GO:0005802);; Molecular Function: methyltransferase activity (GO:0008168);; Cellular Component: integral component of membrane (GO:0016021);;	K15449|3.7e-149|sly:109120154|K15449 tRNA wybutosine-synthesizing protein 1 [EC:4.1.3.44] | (RefSeq) uncharacterized protein LOC109120154	--	--	--	Putative S-adenosyl-L-methionine-dependent methyltransferase	Probable methyltransferase PMT27 OS=Arabidopsis thaliana OX=3702 GN=At3g51070 PE=3 SV=1	S	Function unknown	probable methyltransferase PMT27 isoform X1 [Glycine max]	cellular component: cell (GO:0005623);; cellular component: cell part (GO:0044464);; cellular component: organelle (GO:0043226);; cellular component: organelle part (GO:0044422);; molecular function: catalytic activity (GO:0003824);; cellular component: membrane (GO:0016020);; cellular component: membrane part (GO:0044425)
gene-LOC102664191	4.42802	3.04472	3.8533	0	0	0	1.00105e-08	-6.97175	down	--	--	Molecular Function: DNA binding (GO:0003677);; Molecular Function: transcription factor activity, sequence-specific DNA binding (GO:0003700);; Cellular Component: nucleus (GO:0005634);; Biological Process: positive regulation of transcription, DNA-templated (GO:0045893);;	--	--	--	--	bZIP transcription factor	--	K	Transcription	basic leucine zipper 61 [Glycine max]	molecular function: binding (GO:0005488);; molecular function: nucleic acid binding transcription factor activity (GO:0001071);; biological process: biological regulation (GO:0065007);; cellular component: cell (GO:0005623);; cellular component: organelle (GO:0043226);; cellular component: cell part (GO:0044464)
gene-LOC102670360	2.45948	1.26109	1.9614	1.72303	1.66033	1.38244	0.00385731	1.20462	up	--	--	Cellular Component: plasma membrane (GO:0005886);; Cellular Component: integral component of membrane (GO:0016021);;	--	--	--	--	--	--	S	Function unknown	NDR1/HIN1-like protein 13 [Glycine max]	cellular component: cell (GO:0005623);; cellular component: membrane (GO:0016020);; cellular component: cell part (GO:0044464);; cellular component: membrane part (GO:0044425)
gene-LOC100803864	19.4687	36.4054	20.9717	1.54246	1.55414	1.17997	2.51807e-11	-2.65699	down	--	--	Cellular Component: chloroplast thylakoid membrane (GO:0009535);; Biological Process: regulation of protein complex stability (GO:0061635);;	--	--	--	--	--	Protein MAINTENANCE OF PSII UNDER HIGH LIGHT 1 OS=Arabidopsis thaliana OX=3702 GN=MPH1 PE=1 SV=1	S	Function unknown	uncharacterized protein LOC100803864 [Glycine max]	cellular component: cell (GO:0005623);; cellular component: membrane (GO:0016020);; cellular component: organelle (GO:0043226);; cellular component: organelle part (GO:0044422);; cellular component: cell part (GO:0044464);; biological process: biological regulation (GO:0065007)
gene-LOC100812928	1.19472	2.01735	1.51032	0	0	0	6.11812e-07	-6.34969	down	--	--	Biological Process: tRNA processing (GO:0008033);; Molecular Function: tRNA dimethylallyltransferase activity (GO:0052381);;	K10760|1.7e-134|gmx:100812928|K10760 adenylate dimethylallyltransferase (cytokinin synthase) [EC:2.5.1.27 2.5.1.112] | (RefSeq) adenylate isopentenyltransferase 5, chloroplastic	Zeatin biosynthesis (ko00908)	[J]	Translation, ribosomal structure and biogenesis	IPP transferase	Adenylate isopentenyltransferase 5, chloroplastic OS=Arabidopsis thaliana OX=3702 GN=IPT5 PE=1 SV=2	J	Translation, ribosomal structure and biogenesis	adenylate isopentenyltransferase 5, chloroplastic [Glycine max]	biological process: metabolic process (GO:0008152);; biological process: cellular process (GO:0009987);; molecular function: catalytic activity (GO:0003824)
gene-GMCUPIN10.1	0.365965	1.2043	0.798139	3.37177	2.11882	1.88666	2.86667e-08	2.96019	up	[G]	Carbohydrate transport and metabolism	Cellular Component: cell wall (GO:0005618);; Molecular Function: manganese ion binding (GO:0030145);; Molecular Function: nutrient reservoir activity (GO:0045735);; Cellular Component: apoplast (GO:0048046);;	--	--	--	--	Cupin	Germin-like protein subfamily 3 member 2 OS=Arabidopsis thaliana OX=3702 GN=At3g10080 PE=2 SV=1	S	Function unknown	germin-like protein precursor [Glycine max]	cellular component: cell (GO:0005623);; cellular component: cell part (GO:0044464);; molecular function: binding (GO:0005488);; molecular function: nutrient reservoir activity (GO:0045735);; cellular component: extracellular region (GO:0005576)
gene-LOC100784534	2.36018	2.15153	3.0049	2.17093	2.7681	3.95426	4.63256e-07	1.6925	up	--	--	Molecular Function: phosphatidylinositol phospholipase C activity (GO:0004435);; Biological Process: lipid catabolic process (GO:0016042);; Biological Process: phosphatidylinositol-mediated signaling (GO:0048015);; Biological Process: release of sequestered calcium ion into cytosol (GO:0051209);;	K05857|0.0e+00|gmx:100784534|K05857 phosphatidylinositol phospholipase C, delta [EC:3.1.4.11] | (RefSeq) phosphoinositide phospholipase C 2	Inositol phosphate metabolism (ko00562);; Phosphatidylinositol signaling system (ko04070)	[T]	Signal transduction mechanisms	Phosphatidylinositol-specific phospholipase C, X domain	Phosphoinositide phospholipase C 2 OS=Arabidopsis thaliana OX=3702 GN=PLC2 PE=1 SV=1	I	Lipid transport and metabolism	phosphoinositide phospholipase C 2 [Glycine max]	molecular function: catalytic activity (GO:0003824);; biological process: metabolic process (GO:0008152);; biological process: single-organism process (GO:0044699);; biological process: cellular process (GO:0009987);; biological process: signaling (GO:0023052);; biological process: response to stimulus (GO:0050896);; biological process: biological regulation (GO:0065007);; biological process: loc…
gene-LOC100784436	1.0416	0.618691	1.29675	2.63655	0.577568	7.09715	2.6569e-05	3.0012	up	--	--	--	--	--	--	--	--	--	--	--	uncharacterized protein LOC100784436 [Glycine max]	--
gene-LOC100786430	10.7799	11.4669	11.2218	2.12372	1.05078	1.66634	1.71257e-07	-1.35338	down	--	--	--	--	--	[R]	General function prediction only	--	--	S	Function unknown	peptidoglycan-binding LysM domain-containing protein [Glycine max]	--
gene-LOC100814097	12.1697	10.0948	11.0059	0.461528	0.399566	1.53318	1.71567e-06	-2.31088	down	--	--	Molecular Function: transferase activity, transferring acyl groups other than amino-acyl groups (GO:0016747);;	K13065|2.9e-15|pmum:103335795|K13065 shikimate O-hydroxycinnamoyltransferase [EC:2.3.1.133] | (RefSeq) shikimate O-hydroxycinnamoyltransferase-like	Phenylpropanoid biosynthesis (ko00940);; Flavonoid biosynthesis (ko00941);; Stilbenoid, diarylheptanoid and gingerol biosynthesis (ko00945)	--	--	Transferase family	Protein ECERIFERUM 2 OS=Arabidopsis thaliana OX=3702 GN=CER2 PE=1 SV=1	S	Function unknown	protein ECERIFERUM 2 [Glycine max]	molecular function: catalytic activity (GO:0003824)
gene-LOC100170730	27.5539	74.2561	30.1438	2.95674	2.29637	2.70863	7.05161e-09	-2.56735	down	[CIR]	Energy production and conversion;; Lipid transport and metabolism;; General function prediction only	Molecular Function: FMN binding (GO:0010181);; Molecular Function: oxidoreductase activity (GO:0016491);;	K11517|3.1e-204|gmx:100170730|K11517 (S)-2-hydroxy-acid oxidase [EC:1.1.3.15] | (RefSeq) peroxisomal glycolate oxidase	Glyoxylate and dicarboxylate metabolism (ko00630);; Carbon metabolism (ko01200);; Peroxisome (ko04146)	[C]	Energy production and conversion	FMN-dependent dehydrogenase	(S)-2-hydroxy-acid oxidase GLO1 OS=Arabidopsis thaliana OX=3702 GN=GLO1 PE=1 SV=1	C	Energy production and conversion	peroxisomal glycolate oxidase isoform X1 [Glycine max]	molecular function: binding (GO:0005488);; molecular function: catalytic activity (GO:0003824)
gene-LOC100527145	7.34934	15.786	7.88096	0.170193	0.143396	0.075618	2.22367e-15	-4.57287	down	--	--	Biological Process: photosynthetic electron transport chain (GO:0009767);;	K00345|2.4e-133|gmx:100527145|K00345 NAD(P)H-quinone oxidoreductase subunit S, chloroplastic [EC:1.6.5.-] | (RefSeq) uncharacterized protein LOC100527145	--	--	--	NAD(P)H dehydrogenase subunit S	NAD(P)H-quinone oxidoreductase subunit S, chloroplastic OS=Arabidopsis thaliana OX=3702 GN=ndhS PE=1 SV=1	S	Function unknown	uncharacterized protein LOC100527145 [Glycine max]	biological process: metabolic process (GO:0008152);; biological process: cellular process (GO:0009987);; biological process: single-organism process (GO:0044699)
gene-LOC100305968	7.8701	10.935	8.33286	0	0	0	2.2693e-12	-8.03504	down	[P]	Inorganic ion transport and metabolism	Biological Process: response to acid chemical (GO:0001101);; Molecular Function: molecular_function (GO:0003674);; Molecular Function: catalytic activity (GO:0003824);; Molecular Function: thiosulfate sulfurtransferase activity (GO:0004792);; Cellular Component: cellular_component (GO:0005575);; Cellular Component: intracellular (GO:0005622);; Cellular Component: cell (GO:0005623);; Cellular Comp…	K22547|9.9e-26|pda:103700882|K22547 arsenate reductase [EC:1.20.4.1] | (RefSeq) thiosulfate sulfurtransferase 18-like	--	[P]	Inorganic ion transport and metabolism	Rhodanese-like domain	Rhodanese-like domain-containing protein 15, chloroplastic OS=Arabidopsis thaliana OX=3702 GN=STR15 PE=2 SV=1	P	Inorganic ion transport and metabolism	uncharacterized protein LOC100305968 [Glycine max]	biological process: response to stimulus (GO:0050896);; molecular function: catalytic activity (GO:0003824);; cellular component: cell (GO:0005623);; cellular component: cell part (GO:0044464);; biological process: developmental process (GO:0032502);; biological process: single-organism process (GO:0044699);; cellular component: organelle (GO:0043226)
gene-WRKY11	9.29501	5.13527	8.7968	0.648878	0.810754	0.543427	7.83485e-07	-2.0037	down	--	--	Molecular Function: transcription factor activity, sequence-specific DNA binding (GO:0003700);; Cellular Component: nucleus (GO:0005634);; Molecular Function: sequence-specific DNA binding (GO:0043565);;	K13425|1.1e-22|han:110922953|K13425 WRKY transcription factor 22 | (RefSeq) WRKY transcription factor 22-like	MAPK signaling pathway - plant (ko04016);; Plant-pathogen interaction (ko04626)	--	--	WRKY DNA -binding domain	Probable WRKY transcription factor 15 OS=Arabidopsis thaliana OX=3702 GN=WRKY15 PE=2 SV=1	K	Transcription	WRKY transcription factor [Glycine max]	molecular function: nucleic acid binding transcription factor activity (GO:0001071);; biological process: biological regulation (GO:0065007);; cellular component: cell (GO:0005623);; cellular component: organelle (GO:0043226);; cellular component: cell part (GO:0044464);; molecular function: binding (GO:0005488)
gene-LOC100816187	3.71829	7.75154	4.6461	0	0	0	8.08163e-16	-8.90235	down	[T]	Signal transduction mechanisms	Molecular Function: protein kinase activity (GO:0004672);; Molecular Function: ATP binding (GO:0005524);;	K08867|5.1e-274|gmx:100816187|K08867 WNK lysine deficient protein kinase [EC:2.7.11.1] | (RefSeq) probable serine/threonine-protein kinase WNK5 isoform X1	--	[R]	General function prediction only	Protein kinase domain	Probable serine/threonine-protein kinase WNK5 OS=Arabidopsis thaliana OX=3702 GN=WNK5 PE=1 SV=2	T	Signal transduction mechanisms	probable serine/threonine-protein kinase WNK5 isoform X3 [Glycine max]	molecular function: catalytic activity (GO:0003824);; biological process: metabolic process (GO:0008152);; biological process: cellular process (GO:0009987);; molecular function: binding (GO:0005488)
gene-LOC100792588	0.343624	0.062944	0.288043	2.979	2.35902	2.47201	5.03571e-24	4.80169	up	[V]	Defense mechanisms	Molecular Function: antiporter activity (GO:0015297);; Cellular Component: membrane (GO:0016020);; Cellular Component: integral component of membrane (GO:0016021);; Molecular Function: transmembrane transporter activity (GO:0022857);; Molecular Function: xenobiotic transporter activity (GO:0042910);;	K03327|4.4e-278|gmx:100792588|K03327 multidrug resistance protein, MATE family | (RefSeq) protein DETOXIFICATION 16	--	[R]	General function prediction only	MatE	Protein DETOXIFICATION 16 OS=Arabidopsis thaliana OX=3702 GN=DTX16 PE=2 SV=1	V	Defense mechanisms	protein DETOXIFICATION 16 [Glycine max]	molecular function: transporter activity (GO:0005215);; biological process: localization (GO:0051179);; cellular component: membrane (GO:0016020);; cellular component: membrane part (GO:0044425)
gene-LOC100810486	4.97263	7.61064	3.35715	0	0	0	7.7885e-10	-7.37424	down	--	--	--	--	--	--	--	Protein of unknown function (DUF1677)	--	S	Function unknown	uncharacterized protein LOC100810486 [Glycine max]	--
gene-LOC100806957	6.31065	3.85326	5.23735	0	0.102902	0	0.00730107	-3.89697	down	--	--	Molecular Function: aspartic-type endopeptidase activity (GO:0004190);; Biological Process: proteolysis (GO:0006508);; Biological Process: protein catabolic process (GO:0030163);;	K22683|1.3e-36|pda:103713998|K22683 aspartyl protease family protein [EC:3.4.23.-] | (RefSeq) protein ASPARTIC PROTEASE IN GUARD CELL 1-like	--	[O]	Posttranslational modification, protein turnover, chaperones	Xylanase inhibitor C-terminal	Aspartic proteinase PCS1 OS=Arabidopsis thaliana OX=3702 GN=PCS1 PE=2 SV=1	O	Posttranslational modification, protein turnover, chaperones	aspartic proteinase PCS1 [Glycine max]	molecular function: catalytic activity (GO:0003824);; biological process: metabolic process (GO:0008152)
gene-LOC100795132	1.30986	1.81993	1.35306	3.77548	0.671885	1.57948	0.00480466	1.72572	up	--	--	--	--	--	--	--	--	--	--	--	uncharacterized protein LOC100795132 [Glycine max]	--
gene-LOC100305555	53.083	53.6086	55.6095	5.71873	3.2565	2.29012	2.21638e-11	-2.36773	down	--	--	Molecular Function: electron carrier activity (GO:0009055);; Cellular Component: integral component of membrane (GO:0016021);;	--	--	--	--	Plastocyanin-like domain	Lamin-like protein OS=Arabidopsis thaliana OX=3702 GN=At5g15350 PE=2 SV=1	S	Function unknown	uncharacterized protein LOC100305555 precursor [Glycine max]	molecular function: electron carrier activity (GO:0009055);; cellular component: membrane (GO:0016020);; cellular component: membrane part (GO:0044425)
gene-LOC100795100	23.0341	15.391	23.025	1.1734	0.843991	2.9669	1.16375e-06	-2.15165	down	--	--	--	K13081|1.5e-211|gmx:100795100|K13081 leucoanthocyanidin reductase [EC:1.17.1.3] | (RefSeq) leucoanthocyanidin reductase	Flavonoid biosynthesis (ko00941)	--	--	NmrA-like family	Leucoanthocyanidin reductase OS=Desmodium uncinatum OX=225101 GN=LAR PE=1 SV=1	S	Function unknown	leucoanthocyanidin reductase [Glycine max]	--
gene-LOC100818052	10.5614	9.59871	10.6938	9.41308	11.0584	7.27073	1.98039e-05	1.3434	up	--	--	Biological Process: immune system process (GO:0002376);; Molecular Function: molecular_function (GO:0003674);; Molecular Function: binding (GO:0005488);; Molecular Function: protein binding (GO:0005515);; Cellular Component: cellular_component (GO:0005575);; Cellular Component: intracellular (GO:0005622);; Cellular Component: cell (GO:0005623);; Cellular Component: cytoplasm (GO:0005737);; Cellul…	K11838|5.3e-24|ppp:112288942|K11838 ubiquitin carboxyl-terminal hydrolase 7 [EC:3.4.19.12] | (RefSeq) ubiquitin carboxyl-terminal hydrolase 12-like isoform X1	--	--	--	MATH domain	TNF receptor-associated factor homolog 1a OS=Arabidopsis thaliana OX=3702 GN=TRAF1A PE=1 SV=1	S	Function unknown	TNF receptor-associated factor homolog 1b isoform X1 [Glycine max]	biological process: immune system process (GO:0002376);; molecular function: binding (GO:0005488);; cellular component: cell (GO:0005623);; cellular component: cell part (GO:0044464);; cellular component: membrane (GO:0016020);; biological process: metabolic process (GO:0008152);; biological process: cellular process (GO:0009987);; biological process: response to stimulus (GO:0050896);; biologica…
gene-LOC100808242	4.64973	4.65514	3.53232	0.381848	0.155811	0.410394	7.80184e-08	-2.2657	down	--	--	Cellular Component: nucleus (GO:0005634);; Molecular Function: zinc ion binding (GO:0008270);; Biological Process: cell differentiation (GO:0030154);; Molecular Function: sequence-specific DNA binding (GO:0043565);; Biological Process: positive regulation of transcription, DNA-templated (GO:0045893);;	K21630|2.2e-38|cmax:111478040|K21630 GATA-type zinc finger protein 1 | (RefSeq) GATA transcription factor 6-like	--	[K]	Transcription	GATA zinc finger	GATA transcription factor 5 OS=Arabidopsis thaliana OX=3702 GN=GATA5 PE=2 SV=1	K	Transcription	GATA transcription factor 7 [Glycine max]	cellular component: cell (GO:0005623);; cellular component: organelle (GO:0043226);; cellular component: cell part (GO:0044464);; molecular function: binding (GO:0005488);; biological process: cellular process (GO:0009987);; biological process: developmental process (GO:0032502);; biological process: single-organism process (GO:0044699);; biological process: biological regulation (GO:0065007)
gene-LOC100783088	2.99983	2.4566	2.58698	0.266737	0.459044	0.215412	0.00300767	-1.53287	down	--	--	Cellular Component: nucleus (GO:0005634);; Biological Process: regulation of gene expression (GO:0010468);; Biological Process: anatomical structure development (GO:0048856);;	K09228|4.0e-10|ppp:112288929|K09228 KRAB domain-containing zinc finger protein | (RefSeq) zinc finger protein JACKDAW-like	--	[R]	General function prediction only	--	Zinc finger protein WIP2 OS=Arabidopsis thaliana OX=3702 GN=WIP2 PE=1 SV=1	S	Function unknown	zinc finger protein WIP2 [Glycine max]	cellular component: cell (GO:0005623);; cellular component: organelle (GO:0043226);; cellular component: cell part (GO:0044464);; biological process: biological regulation (GO:0065007);; biological process: developmental process (GO:0032502)
gene-LOC100780526	13.5628	10.3062	13.9442	16.3585	10.0397	13.6119	1.88263e-13	1.51481	up	[E]	Amino acid transport and metabolism	Molecular Function: transaminase activity (GO:0008483);; Molecular Function: pyridoxal phosphate binding (GO:0030170);;	K00827|5.6e-278|gmx:100780526|K00827 alanine-glyoxylate transaminase / (R)-3-amino-2-methylpropionate-pyruvate transaminase [EC:2.6.1.44 2.6.1.40] | (RefSeq) alanine--glyoxylate aminotransferase 2 homolog 1, mitochondrial isoform X2	Alanine, aspartate and glutamate metabolism (ko00250);; Glycine, serine and threonine metabolism (ko00260);; Cysteine and methionine metabolism (ko00270);; Valine, leucine and isoleucine degradation (ko00280)	[E]	Amino acid transport and metabolism	Aminotransferase class-III	Alanine--glyoxylate aminotransferase 2 homolog 1, mitochondrial OS=Arabidopsis thaliana OX=3702 GN=AGT2 PE=1 SV=1	E	Amino acid transport and metabolism	alanine--glyoxylate aminotransferase 2 homolog 1, mitochondrial isoform X1 [Glycine max]	molecular function: catalytic activity (GO:0003824);; molecular function: binding (GO:0005488)
gene-LOC100820148	3.90734	5.75929	4.1721	0.391426	0.322644	0.783353	3.94065e-05	-1.73706	down	--	--	--	K01593|9.0e-37|mtr:MTR_7g058700|K01593 aromatic-L-amino-acid/L-tryptophan decarboxylase [EC:4.1.1.28 4.1.1.105] | (RefSeq) tyrosine/DOPA decarboxylase	Tyrosine metabolism (ko00350);; Phenylalanine metabolism (ko00360);; Tryptophan metabolism (ko00380);; Isoquinoline alkaloid biosynthesis (ko00950);; Betalain biosynthesis (ko00965)	--	--	Protein of unknown function (DUF674)	--	S	Function unknown	uncharacterized protein LOC100820148 [Glycine max]	--
Glycine_max_newGene_6295	11.8791	18.0335	11.5315	0.31025	0.203712	0.235018	1.07508e-32	-4.24482	down	[I]	Lipid transport and metabolism	Molecular Function: farnesyl-diphosphate farnesyltransferase activity (GO:0004310);; Biological Process: carotenoid biosynthetic process (GO:0016117);; Molecular Function: geranylgeranyl-diphosphate geranylgeranyltransferase activity (GO:0016767);; Molecular Function: squalene synthase activity (GO:0051996);;	K02291|1.8e-129|gmx:100780932|K02291 15-cis-phytoene synthase [EC:2.5.1.32] | (RefSeq) phytoene synthase, chloroplastic-like	Carotenoid biosynthesis (ko00906)	[I]	Lipid transport and metabolism	Squalene/phytoene synthase	Phytoene synthase, chloroplastic OS=Cucumis melo OX=3656 GN=PSY PE=2 SV=1	I	Lipid transport and metabolism	hypothetical protein GLYMA_14G209700 [Glycine max]	molecular function: catalytic activity (GO:0003824);; biological process: metabolic process (GO:0008152);; biological process: cellular process (GO:0009987);; biological process: single-organism process (GO:0044699)
gene-LOC100792887	1.45568	1.99503	2.13537	0.205422	0.216579	0.154424	0.000402516	-1.73822	down	[T]	Signal transduction mechanisms	Molecular Function: protein kinase activity (GO:0004672);; Molecular Function: protein serine/threonine kinase activity (GO:0004674);; Molecular Function: ATP binding (GO:0005524);; Cellular Component: cytoplasm (GO:0005737);; Biological Process: signal transduction (GO:0007165);;	K04427|3.1e-73|lang:109331017|K04427 mitogen-activated protein kinase kinase kinase 7 [EC:2.7.11.25] | (RefSeq) serine/threonine-protein kinase HT1-like	--	[T]	Signal transduction mechanisms	Protein tyrosine and serine/threonine kinase	Serine/threonine/tyrosine-protein kinase HT1 OS=Arabidopsis thaliana OX=3702 GN=HT1 PE=1 SV=1	T	Signal transduction mechanisms	serine/threonine-protein kinase HT1 [Glycine max]	molecular function: catalytic activity (GO:0003824);; biological process: metabolic process (GO:0008152);; biological process: cellular process (GO:0009987);; molecular function: binding (GO:0005488);; cellular component: cell (GO:0005623);; cellular component: cell part (GO:0044464);; biological process: biological regulation (GO:0065007)
gene-GND	45.2024	84.8146	51.8414	2.75006	2.11411	4.88122	6.72709e-13	-2.76904	down	[G]	Carbohydrate transport and metabolism	Molecular Function: phosphogluconate dehydrogenase (decarboxylating) activity (GO:0004616);; Cellular Component: cytosol (GO:0005829);; Biological Process: pentose-phosphate shunt, oxidative branch (GO:0009051);; Biological Process: D-gluconate catabolic process (GO:0046177);; Molecular Function: NADP binding (GO:0050661);;	K00033|1.4e-281|gmx:547455|K00033 6-phosphogluconate dehydrogenase [EC:1.1.1.44 1.1.1.343] | (RefSeq) GND; 6-phosphogluconate dehydrogenase	Pentose phosphate pathway (ko00030);; Glutathione metabolism (ko00480);; Carbon metabolism (ko01200)	[G]	Carbohydrate transport and metabolism	6-phosphogluconate dehydrogenase, C-terminal domain	6-phosphogluconate dehydrogenase, decarboxylating 2 OS=Arabidopsis thaliana OX=3702 GN=PGD2 PE=1 SV=1	G	Carbohydrate transport and metabolism	6-phosphogluconate dehydrogenase [Glycine max]	molecular function: catalytic activity (GO:0003824);; biological process: metabolic process (GO:0008152);; biological process: single-organism process (GO:0044699);; cellular component: cell (GO:0005623);; cellular component: cell part (GO:0044464);; biological process: cellular process (GO:0009987);; molecular function: binding (GO:0005488)
gene-LOC100798976	0.548342	0.491362	0.44241	0	0	0	3.11462e-05	-5.59007	down	--	--	Biological Process: cytoskeleton organization (GO:0007010);; Molecular Function: microtubule binding (GO:0008017);;	--	--	--	--	Microtubule-associated protein 70	Microtubule-associated protein 70-5 OS=Arabidopsis thaliana OX=3702 GN=MAP70.5 PE=1 SV=1	S	Function unknown	microtubule-associated protein 70-5 [Glycine max]	biological process: cellular process (GO:0009987);; biological process: cellular component organization or biogenesis (GO:0071840);; molecular function: binding (GO:0005488)
gene-LOC100806979	3.10098	3.02702	3.90562	5.08443	2.39915	4.08907	1.92973e-07	1.61231	up	--	--	--	--	--	--	--	--	--	--	--	uncharacterized protein LOC100806979 [Glycine max]	--
gene-LOC112999357	3.39067	2.50472	2.49093	3.71445	4.88213	3.46332	4.62843e-07	1.98416	up	--	--	Molecular Function: RNA binding (GO:0003723);;	K13415|4.7e-07|obr:102715163|K13415 protein brassinosteroid insensitive 1 [EC:2.7.10.1 2.7.11.1] | (RefSeq) protein BRASSINOSTEROID INSENSITIVE 1-like	Plant hormone signal transduction (ko04075)	--	--	zinc-binding in reverse transcriptase	--	A	RNA processing and modification	uncharacterized protein LOC112999357 [Glycine max]	molecular function: binding (GO:0005488)
gene-LOC100816243	0.264041	0.441538	0.807288	1.19707	1.65912	0.393194	0.00035987	2.48986	up	--	--	Molecular Function: AT DNA binding (GO:0003680);; Molecular Function: transcription factor activity, sequence-specific DNA binding (GO:0003700);; Cellular Component: nucleus (GO:0005634);; Biological Process: vegetative to reproductive phase transition of meristem (GO:0010228);;	--	--	--	--	Plants and Prokaryotes Conserved (PCC) domain	AT-hook motif nuclear-localized protein 22 OS=Arabidopsis thaliana OX=3702 GN=AHL22 PE=1 SV=1	K	Transcription	AT-hook motif nuclear-localized protein 22 [Glycine max]	molecular function: binding (GO:0005488);; molecular function: nucleic acid binding transcription factor activity (GO:0001071);; biological process: biological regulation (GO:0065007);; cellular component: cell (GO:0005623);; cellular component: organelle (GO:0043226);; cellular component: cell part (GO:0044464);; biological process: reproduction (GO:0000003);; biological process: reproductive pr…
gene-LOC100810214	2.71449	2.12987	2.7422	2.18783	1.88016	1.82245	2.60275e-05	1.09428	up	--	--	Molecular Function: protein serine/threonine phosphatase activity (GO:0004722);; Molecular Function: magnesium-dependent protein serine/threonine phosphatase activity (GO:0004724);;	K01102|9.2e-128|gmx:100804061|K01102 pyruvate dehydrogenase phosphatase [EC:3.1.3.43] | (RefSeq) probable protein phosphatase 2C 4	--	[T]	Signal transduction mechanisms	Protein phosphatase 2C	Probable protein phosphatase 2C 4 OS=Arabidopsis thaliana OX=3702 GN=PLL5 PE=2 SV=1	T	Signal transduction mechanisms	probable protein phosphatase 2C 4 [Glycine max]	molecular function: catalytic activity (GO:0003824);; biological process: metabolic process (GO:0008152);; biological process: cellular process (GO:0009987)
gene-LOC100789614	7.7309	8.14387	6.91416	1.22687	0.618288	1.28927	8.63328e-06	-1.41703	down	[J]	Translation, ribosomal structure and biogenesis	Molecular Function: RNA binding (GO:0003723);; Molecular Function: ribonuclease T2 activity (GO:0033897);;	K01166|1.9e-163|gmx:100789614|K01166 ribonuclease T2 [EC:4.6.1.19] | (RefSeq) ribonuclease 2	--	[A]	RNA processing and modification	Ribonuclease T2 family	Ribonuclease 2 OS=Arabidopsis thaliana OX=3702 GN=RNS2 PE=2 SV=1	A	RNA processing and modification	ribonuclease 2 [Glycine max]	molecular function: binding (GO:0005488);; molecular function: catalytic activity (GO:0003824);; biological process: metabolic process (GO:0008152);; biological process: cellular process (GO:0009987)
gene-LOC100812565	7.43681	2.87701	6.15176	0.999119	0.255278	0.743537	0.00297937	-1.57117	down	[M]	Cell wall/membrane/envelope biogenesis	Molecular Function: RNA binding (GO:0003723);; Molecular Function: UDP-glucose 4-epimerase activity (GO:0003978);; Cellular Component: cytosol (GO:0005829);; Biological Process: galactose metabolic process (GO:0006012);; Biological Process: rRNA processing (GO:0006364);;	K01784|2.6e-205|gmx:100812565|K01784 UDP-glucose 4-epimerase [EC:5.1.3.2] | (RefSeq) UDP-glucose 4-epimerase GEPI48-like	Galactose metabolism (ko00052);; Amino sugar and nucleotide sugar metabolism (ko00520)	[M]	Cell wall/membrane/envelope biogenesis	GDP-mannose 4,6 dehydratase	UDP-glucose 4-epimerase GEPI48 OS=Cyamopsis tetragonoloba OX=3832 PE=2 SV=1	M	Cell wall/membrane/envelope biogenesis	UDP-glucose 4-epimerase GEPI48-like [Glycine max]	molecular function: binding (GO:0005488);; molecular function: catalytic activity (GO:0003824);; cellular component: cell (GO:0005623);; cellular component: cell part (GO:0044464);; biological process: metabolic process (GO:0008152);; biological process: single-organism process (GO:0044699);; biological process: cellular process (GO:0009987)
gene-LOC100787379	1.38073	1.16697	1.55082	0.021844	0.037278	0.022718	1.73633e-09	-3.71433	down	[R]	General function prediction only	Molecular Function: protein kinase activity (GO:0004672);; Molecular Function: ATP binding (GO:0005524);; Cellular Component: integral component of membrane (GO:0016021);;	K13418|5.5e-63|cic:CICLE_v10027231mg|K13418 somatic embryogenesis receptor kinase 1 [EC:2.7.10.1 2.7.11.1] | (RefSeq) hypothetical protein	--	--	--	Protein kinase domain	Cysteine-rich receptor-like protein kinase 2 OS=Arabidopsis thaliana OX=3702 GN=CRK2 PE=1 SV=1	T	Signal transduction mechanisms	cysteine-rich receptor-like protein kinase 2 isoform X1 [Glycine max]	molecular function: catalytic activity (GO:0003824);; biological process: metabolic process (GO:0008152);; biological process: cellular process (GO:0009987);; molecular function: binding (GO:0005488);; cellular component: membrane (GO:0016020);; cellular component: membrane part (GO:0044425)
gene-LOC100782231	18.9432	38.2206	18.9694	0.12946	0.452457	1.00995	9.18019e-11	-3.96164	down	--	--	Cellular Component: integral component of membrane (GO:0016021);; Biological Process: oxidation-reduction process (GO:0055114);;	--	--	[T]	Signal transduction mechanisms	DOMON domain	Cytochrome b561 and DOMON domain-containing protein At3g61750 OS=Arabidopsis thaliana OX=3702 GN=At3g61750 PE=3 SV=1	T	Signal transduction mechanisms	cytochrome b561 and DOMON domain-containing protein At3g61750 [Glycine max]	cellular component: membrane (GO:0016020);; cellular component: membrane part (GO:0044425);; biological process: metabolic process (GO:0008152);; biological process: single-organism process (GO:0044699)
gene-LOC100812162	11.0877	12.0473	10.7026	12.6856	16.0373	11.6958	1.81202e-08	1.73236	up	[PR]	Inorganic ion transport and metabolism;; General function prediction only	Molecular Function: chlorophyllide a oxygenase [overall] activity (GO:0010277);; Molecular Function: 2 iron, 2 sulfur cluster binding (GO:0051537);;	K13071|0.0e+00|gmx:100812162|K13071 pheophorbide a oxygenase [EC:1.14.15.17] | (RefSeq) pheophorbide a oxygenase, chloroplastic	Porphyrin and chlorophyll metabolism (ko00860)	--	--	Pheophorbide a oxygenase	Pheophorbide a oxygenase, chloroplastic OS=Oryza sativa subsp. japonica OX=39947 GN=PAO PE=2 SV=1	P	Inorganic ion transport and metabolism	pheophorbide a oxygenase, chloroplastic [Glycine max]	molecular function: catalytic activity (GO:0003824);; biological process: metabolic process (GO:0008152);; biological process: single-organism process (GO:0044699);; molecular function: binding (GO:0005488)
gene-LOC100812207	0.97583	0.622944	1.49747	0.773229	1.37278	0.984155	0.00343161	1.50018	up	--	--	Molecular Function: zinc ion binding (GO:0008270);; Biological Process: RNA modification (GO:0009451);; Cellular Component: intracellular membrane-bounded organelle (GO:0043231);;	K22733|6.3e-132|cit:102612526|K22733 magnesium transporter | (RefSeq) uncharacterized protein LOC102612526	--	[R]	General function prediction only	PPR repeat family	Pentatricopeptide repeat-containing protein At1g08070, chloroplastic OS=Arabidopsis thaliana OX=3702 GN=PCMP-H12 PE=2 SV=1	S	Function unknown	pentatricopeptide repeat-containing protein At1g08070, chloroplastic [Glycine max]	molecular function: binding (GO:0005488);; biological process: metabolic process (GO:0008152);; biological process: cellular process (GO:0009987);; cellular component: cell (GO:0005623);; cellular component: organelle (GO:0043226);; cellular component: cell part (GO:0044464)
gene-LOC100798087	11.726	7.0117	11.6052	7.90606	10.488	5.18735	0.00640434	1.14429	up	--	--	Biological Process: maturation of SSU-rRNA from tricistronic rRNA transcript (SSU-rRNA, 5.8S rRNA, LSU-rRNA) (GO:0000462);; Molecular Function: snoRNA binding (GO:0030515);; Cellular Component: 90S preribosome (GO:0030686);; Cellular Component: small-subunit processome (GO:0032040);; Cellular Component: t-UTP complex (GO:0034455);; Biological Process: positive regulation of transcription from RNA…	K14550|0.0e+00|gmx:100798087|K14550 U3 small nucleolar RNA-associated protein 10 | (RefSeq) uncharacterized protein At3g06530 isoform X1	Ribosome biogenesis in eukaryotes (ko03008)	[S]	Function unknown	BP28CT (NUC211) domain	Uncharacterized protein At3g06530 OS=Arabidopsis thaliana OX=3702 GN=At3g06530 PE=1 SV=3	S	Function unknown	uncharacterized protein At3g06530 isoform X1 [Glycine max]	biological process: metabolic process (GO:0008152);; biological process: cellular process (GO:0009987);; biological process: cellular component organization or biogenesis (GO:0071840);; molecular function: binding (GO:0005488);; cellular component: cell (GO:0005623);; cellular component: macromolecular complex (GO:0032991);; cellular component: cell part (GO:0044464);; cellular component: membran…
gene-LOC100795803	3.96664	4.77743	3.432	0.542074	0.338143	0.624735	7.98248e-06	-1.566	down	--	--	Molecular Function: aspartic-type endopeptidase activity (GO:0004190);; Biological Process: proteolysis (GO:0006508);; Cellular Component: integral component of membrane (GO:0016021);; Biological Process: protein catabolic process (GO:0030163);;	K00924|5.0e-218|lang:109351698|K00924 kinase [EC:2.7.1.-] | (RefSeq) aspartic proteinase-like protein 2	--	[O]	Posttranslational modification, protein turnover, chaperones	Xylanase inhibitor N-terminal	Aspartic proteinase 36 OS=Arabidopsis thaliana OX=3702 GN=A36 PE=1 SV=1	O	Posttranslational modification, protein turnover, chaperones	aspartic proteinase-like protein 2 [Glycine max]	molecular function: catalytic activity (GO:0003824);; biological process: metabolic process (GO:0008152);; cellular component: membrane (GO:0016020);; cellular component: membrane part (GO:0044425)
gene-LOC100792483	1.13898	1.03153	0.943813	54.2696	45.7042	47.4457	1.7669e-194	6.96851	up	--	--	Cellular Component: plasmodesma (GO:0009506);; Cellular Component: integral component of membrane (GO:0016021);; Cellular Component: anchored component of plasma membrane (GO:0046658);;	K04077|1.2e-08|cmos:111455859|K04077 chaperonin GroEL | (RefSeq) chaperonin CPN60-like 2, mitochondrial	RNA degradation (ko03018)	--	--	Late embryogenesis abundant protein	NDR1/HIN1-like protein 1 OS=Arabidopsis thaliana OX=3702 GN=NHL1 PE=2 SV=1	S	Function unknown	NDR1/HIN1-like protein 12 [Glycine max]	cellular component: cell junction (GO:0030054);; cellular component: membrane (GO:0016020);; cellular component: membrane part (GO:0044425);; cellular component: cell (GO:0005623);; cellular component: cell part (GO:0044464)
gene-LOC100815245	9.80906	9.98844	10.3587	0.752183	0.44801	0.793431	7.43299e-20	-2.44014	down	[T]	Signal transduction mechanisms	Molecular Function: protein serine/threonine phosphatase activity (GO:0004722);; Molecular Function: magnesium-dependent protein serine/threonine phosphatase activity (GO:0004724);; Molecular Function: metal ion binding (GO:0046872);;	K17506|1.5e-150|gmx:100815245|K17506 protein phosphatase 1L [EC:3.1.3.16] | (RefSeq) probable protein phosphatase 2C 39	--	[T]	Signal transduction mechanisms	Protein phosphatase 2C	Probable protein phosphatase 2C 39 OS=Arabidopsis thaliana OX=3702 GN=At3g15260 PE=2 SV=1	T	Signal transduction mechanisms	probable protein phosphatase 2C 39 [Glycine max]	molecular function: catalytic activity (GO:0003824);; biological process: metabolic process (GO:0008152);; biological process: cellular process (GO:0009987);; molecular function: binding (GO:0005488)
gene-LOC100787149	7.0494	3.40921	5.83904	96.1088	83.1183	61.8086	5.67353e-49	5.48696	up	--	--	Cellular Component: integral component of membrane (GO:0016021);;	--	--	--	--	--	--	--	--	uncharacterized protein LOC100787149 isoform X1 [Glycine max]	cellular component: membrane (GO:0016020);; cellular component: membrane part (GO:0044425)
gene-LOC100305836	1.60374	7.39122	2.3679	0	0.21134	0.137149	0.00148536	-3.14437	down	--	--	Cellular Component: integral component of membrane (GO:0016021);;	--	--	--	--	--	--	S	Function unknown	uncharacterized protein LOC100305836 [Glycine max]	cellular component: membrane (GO:0016020);; cellular component: membrane part (GO:0044425)
gene-LOC100785790	4.83536	3.5494	5.31921	0.343352	0.251257	0.068902	1.20865e-07	-2.79707	down	--	--	Molecular Function: microtubule motor activity (GO:0003777);; Molecular Function: ATP binding (GO:0005524);; Cellular Component: kinesin complex (GO:0005871);; Cellular Component: microtubule (GO:0005874);; Biological Process: microtubule-based movement (GO:0007018);; Molecular Function: microtubule binding (GO:0008017);; Molecular Function: ATP-dependent microtubule motor activity, plus-end-dire…	K10400|0.0e+00|gmx:100785790|K10400 kinesin family member 15 | (RefSeq) kinesin-like protein KIN-12B isoform X1	--	--	--	Kinesin motor domain	Kinesin-like protein KIN-12B OS=Arabidopsis thaliana OX=3702 GN=KIN12B PE=1 SV=1	Z	Cytoskeleton	kinesin-like protein KIN-12B isoform X1 [Glycine max]	molecular function: catalytic activity (GO:0003824);; molecular function: binding (GO:0005488);; cellular component: cell (GO:0005623);; cellular component: macromolecular complex (GO:0032991);; cellular component: organelle (GO:0043226);; cellular component: organelle part (GO:0044422);; cellular component: cell part (GO:0044464);; cellular component: supramolecular complex (GO:0099080);; biolog…
gene-LOC100794879	0.455182	0.541296	0.931194	0.020258	0	0	7.35748e-05	-4.2591	down	--	--	Molecular Function: transcription regulatory region sequence-specific DNA binding (GO:0000976);; Cellular Component: nucleus (GO:0005634);; Biological Process: regulation of transcription, DNA-templated (GO:0006355);;	--	--	--	--	No apical meristem (NAM) protein	SUPPRESSOR OF GAMMA RESPONSE 1 OS=Arabidopsis thaliana OX=3702 GN=SOG1 PE=1 SV=1	K	Transcription	SUPPRESSOR OF GAMMA RESPONSE 1 [Glycine max]	molecular function: binding (GO:0005488);; cellular component: cell (GO:0005623);; cellular component: organelle (GO:0043226);; cellular component: cell part (GO:0044464);; biological process: biological regulation (GO:0065007)
gene-LOC100794675	77.9326	66.666	80.479	65.8442	46.6695	61.9469	1.99903e-12	1.07449	up	[J]	Translation, ribosomal structure and biogenesis	Molecular Function: mRNA binding (GO:0003729);; Cellular Component: cytosol (GO:0005829);;	K13201|1.2e-42|csl:COCSUDRAFT_20324|K13201 nucleolysin TIA-1/TIAR | (RefSeq) RNA-binding domain-containing protein	--	[R]	General function prediction only	RNA recognition motif. (a.k.a. RRM, RBD, or RNP domain)	Polyadenylate-binding protein RBP45 OS=Nicotiana plumbaginifolia OX=4092 GN=RBP45 PE=1 SV=1	A	RNA processing and modification	polyadenylate-binding protein RBP45 [Glycine max]	molecular function: binding (GO:0005488);; cellular component: cell (GO:0005623);; cellular component: cell part (GO:0044464)
gene-LOC100789605	6.93845	23.1173	7.60419	0.022477	0	0.038734	5.60151e-20	-7.11891	down	--	--	Molecular Function: transferase activity, transferring acyl groups other than amino-acyl groups (GO:0016747);;	K13065|5.3e-22|dcr:108223132|K13065 shikimate O-hydroxycinnamoyltransferase [EC:2.3.1.133] | (RefSeq) shikimate O-hydroxycinnamoyltransferase-like	Phenylpropanoid biosynthesis (ko00940);; Flavonoid biosynthesis (ko00941);; Stilbenoid, diarylheptanoid and gingerol biosynthesis (ko00945)	--	--	Transferase family	Protein ECERIFERUM 26 OS=Arabidopsis thaliana OX=3702 GN=CER26 PE=2 SV=1	S	Function unknown	protein ECERIFERUM 26 [Glycine max]	molecular function: catalytic activity (GO:0003824)
gene-LOC100789108	2.60214	1.47211	3.18352	0.149208	0.156877	0.088117	1.01016e-06	-2.60268	down	[C]	Energy production and conversion	Molecular Function: lactaldehyde dehydrogenase activity (GO:0008911);;	K00131|5.5e-289|gmx:100789108|K00131 glyceraldehyde-3-phosphate dehydrogenase (NADP+) [EC:1.2.1.9] | (RefSeq) NADP-dependent glyceraldehyde-3-phosphate dehydrogenase	Glycolysis / Gluconeogenesis (ko00010);; Pentose phosphate pathway (ko00030);; Carbon metabolism (ko01200)	[C]	Energy production and conversion	Aldehyde dehydrogenase family	NADP-dependent glyceraldehyde-3-phosphate dehydrogenase OS=Nicotiana plumbaginifolia OX=4092 GN=GAPN PE=2 SV=1	C	Energy production and conversion	NADP-dependent glyceraldehyde-3-phosphate dehydrogenase [Glycine max]	molecular function: catalytic activity (GO:0003824);; biological process: metabolic process (GO:0008152);; biological process: single-organism process (GO:0044699)
gene-LOC100811905	2.00229	1.88741	1.9299	0.086253	0.109012	0.149598	4.68221e-07	-2.45973	down	--	--	--	--	--	--	--	Auxin canalisation	VAN3-binding protein OS=Arabidopsis thaliana OX=3702 GN=VAB PE=1 SV=1	T	Signal transduction mechanisms	VAN3-binding protein [Glycine max]	--
gene-LOC102661321	62.2953	52.1056	70.9529	0.464584	0	0	0.000277227	-5.17746	down	--	--	Cellular Component: apoplast (GO:0048046);;	K23544|1.8e-08|spen:107030478|K23544 serine incorporator 1/3 | (RefSeq) probable serine incorporator	--	--	--	Dirigent-like protein	Disease resistance response protein 206 OS=Pisum sativum OX=3888 GN=PI206 PE=1 SV=2	S	Function unknown	dirigent protein 2 [Glycine max]	cellular component: extracellular region (GO:0005576)
gene-LOC100813357	7.06023	5.91422	7.44169	0	0	0	5.85837e-15	-8.63147	down	[QV]	Secondary metabolites biosynthesis, transport and catabolism;; Defense mechanisms	Molecular Function: monooxygenase activity (GO:0004497);; Molecular Function: iron ion binding (GO:0005506);; Cellular Component: integral component of membrane (GO:0016021);; Molecular Function: oxidoreductase activity, acting on paired donors, with incorporation or reduction of molecular oxygen (GO:0016705);; Molecular Function: heme binding (GO:0020037);;	K20617|7.8e-153|egr:104423680|K20617 cytochrome P450 family 71 subfamily A | (RefSeq) cytochrome P450 71A26	--	[Q]	Secondary metabolites biosynthesis, transport and catabolism	Cytochrome P450	Cytochrome P450 736A117 OS=Prunus mume OX=102107 GN=CYP736A117 PE=2 SV=1	Q	Secondary metabolites biosynthesis, transport and catabolism	cytochrome P450 71A26 [Glycine max]	molecular function: catalytic activity (GO:0003824);; biological process: metabolic process (GO:0008152);; biological process: single-organism process (GO:0044699);; molecular function: binding (GO:0005488);; cellular component: membrane (GO:0016020);; cellular component: membrane part (GO:0044425)
gene-LOC100779359	9.34056	11.2489	10.2927	9.17116	5.95216	8.1656	8.07538e-06	1.0195	up	[J]	Translation, ribosomal structure and biogenesis	Molecular Function: RNA binding (GO:0003723);; Cellular Component: chloroplast (GO:0009507);;	K07574|1.4e-134|gmx:100779359|K07574 RNA-binding protein | (RefSeq) uncharacterized protein LOC100779359	--	--	--	CRS1 / YhbY (CRM) domain	--	J	Translation, ribosomal structure and biogenesis	uncharacterized protein LOC100779359 [Glycine max]	molecular function: binding (GO:0005488);; cellular component: cell (GO:0005623);; cellular component: organelle (GO:0043226);; cellular component: cell part (GO:0044464)
gene-LOC100800247	3.49476	1.52094	3.40646	0	0	0	3.17339e-11	-7.76764	down	--	--	Biological Process: response to stress (GO:0006950);; Biological Process: defense response (GO:0006952);; Biological Process: biological_process (GO:0008150);; Biological Process: response to external stimulus (GO:0009605);; Biological Process: response to biotic stimulus (GO:0009607);; Biological Process: response to bacterium (GO:0009617);; Biological Process: defense response to bacterium (GO:…	--	--	--	--	NPH3 family	BTB/POZ domain-containing protein SR1IP1 OS=Arabidopsis thaliana OX=3702 GN=SR1IP1 PE=1 SV=2	S	Function unknown	BTB/POZ domain-containing protein SR1IP1 isoform X1 [Glycine max]	biological process: response to stimulus (GO:0050896);; biological process: multi-organism process (GO:0051704)
gene-LOC100780102	41.3716	45.8407	37.8723	5.52841	4.11333	9.93911	0.000200608	-1.24466	down	--	--	Cellular Component: extracellular region (GO:0005576);; Biological Process: defense response (GO:0006952);;	K12173|1.1e-67|gmx:100794341|K12173 BRCA1-A complex subunit BRE | (RefSeq) BRISC and BRCA1-A complex member 2	Homologous recombination (ko03440)	--	--	Thaumatin family	Thaumatin-like protein 1 OS=Arabidopsis thaliana OX=3702 GN=TLP1 PE=2 SV=1	S	Function unknown	thaumatin-like protein 1b [Glycine max]	cellular component: extracellular region (GO:0005576);; biological process: response to stimulus (GO:0050896)
gene-LOC100784111	21.9638	15.4895	23.2061	18.7548	15.7487	17.3126	7.34864e-08	1.23121	up	[F]	Nucleotide transport and metabolism	Molecular Function: adenylate kinase activity (GO:0004017);; Molecular Function: ATP binding (GO:0005524);; Cellular Component: cytoplasm (GO:0005737);; Biological Process: purine nucleotide metabolic process (GO:0006163);;	K00939|2.8e-146|gmx:100784111|K00939 adenylate kinase [EC:2.7.4.3] | (RefSeq) probable adenylate kinase 7, mitochondrial	Purine metabolism (ko00230);; Thiamine metabolism (ko00730)	[F]	Nucleotide transport and metabolism	Adenylate kinase	Probable adenylate kinase 7, mitochondrial OS=Arabidopsis thaliana OX=3702 GN=At3g01820 PE=2 SV=1	F	Nucleotide transport and metabolism	probable adenylate kinase 7, mitochondrial [Glycine max]	molecular function: catalytic activity (GO:0003824);; biological process: metabolic process (GO:0008152);; biological process: cellular process (GO:0009987);; biological process: single-organism process (GO:0044699);; molecular function: binding (GO:0005488);; cellular component: cell (GO:0005623);; cellular component: cell part (GO:0044464)
gene-LOC100798782	22.0611	27.9464	25.2809	4.25122	2.77991	5.65458	3.44014e-05	-1.16954	down	[M]	Cell wall/membrane/envelope biogenesis	--	--	--	--	--	--	Protein CDI OS=Arabidopsis thaliana OX=3702 GN=CDI PE=2 SV=1	--	--	protein CDI-like [Glycine max]	--
[truncated: 10,835 more rows]

## Sheet: DEGs of DAF30
#ID	HO30a	HO30b	HO30c	LO30a	LO30b	LO30c	FDR	log2FC	regulated	COG_class	COG_class_annotation	GO_annotation	KEGG_annotation	KEGG_pathway_annotation	KOG_class	KOG_class_annotation	Pfam_annotation	Swiss_Prot_annotation	eggNOG_class	eggNOG_class_annotation	NR_annotation	GO_second_level_annotation
[truncated: 2,080 more rows]

[truncated: 1 more sheets: DEGs of DAF50]
