# Supplementary material for: Transcriptomic Analysis Reveals the Regulatory Networks and Hub Genes Controlling the Unsaturated Fatty Acid Contents of Developing Seed in Soybean
Source: Front Plant Sci. 2022 May 12;13:876371. doi: 10.3389/fpls.2022.876371 (PMC9134122; doi:10.3389/fpls.2022.876371)
Supplement: Supplementary Table 2 — The gene specific primers for qRT-PCR. [file Table_4.XLSX]

## Sheet: Sheet1
Table S2. Gene specific primers for qRT-PCR
Gene ID	Forward Primers	Reverse Primers
LOC100802887	GCTTTTCGATTCCTGAGA	CAGCCCCCTTTAAATTA
LOX2	AGATGTTTTCAGTTCCAGG	AGACCACATGCTCCCTTA
LOC100808453	CATCTCAAGAGAGTGTGTA	TTCTGCATCTTGGAGCTGATGA
LOC100809384	CCGCCAATAAACTCCAGGGAAA	TGGATTGTCTGCACCACTTGT
CYP94D24	GGAAAAATCAAAGGGCGCGT	GTCGTCGTTTAGGCACTCCA
LOC100810130	TCATTCTAGGACCATCCGGC	GTCTTTGGCCCAGGTGGATA
TUBB3	GAATCTCATCCCTTTCCCTCG	CATTTGCTGTGTCAGCTCTGG
