# Supplementary material for: Transcriptomic Analysis Reveals the Regulatory Networks and Hub Genes Controlling the Unsaturated Fatty Acid Contents of Developing Seed in Soybean
Source: Front Plant Sci. 2022 May 12;13:876371. doi: 10.3389/fpls.2022.876371 (PMC9134122; doi:10.3389/fpls.2022.876371)
Supplement: Supplementary Table 4 — Gene Ontology analysis of trait-specifical module. [file Table_6.XLSX]

## Sheet: Skyblue module
GO_ID	GO_term	ontology	Items	Background_Items	p_adj	pvalue	Gene_ID
GO:0016168	chlorophyll binding	Molecular Function	33	35	2.22664e-13	1.37193e-16	gene-LOC100799813;gene-LOC100798548;gene-LHCB1-7;gene-LOC100808379;gene-LOC100802138;gene-LOC100789786;gene-LOC100796326;gene-LOC100817348;gene-LOC100527463;gene-LOC100783223;gene-LOC100794944;gene-LOC100815789;gene-LOC100793702;gene-LOC100784089;gene-LOC100786260;gene-LOC100805310;gene-LOC100779387;gene-LOC100794604;gene-LOC100305992;gene-LOC547819;gene-LOC100820327;gene-LOC100500118;gene-CAB3;g…
GO:0046982	protein heterodimerization activity	Molecular Function	98	183	2.87717e-10	1.77275e-13	gene-LOC100778034;gene-LOC100306277;gene-LOC111828532;gene-LOC100810646;gene-LOC100818215;gene-LOC100776133;gene-LOC100810059;gene-LOC100782447;gene-LOC100799680;gene-LOC102669107;gene-LOC100781420;gene-LOC100789332;gene-LOC100776374;gene-LOC100804633;gene-LOC102661475;gene-LOC100778317;gene-LOC100527768;gene-LOC100805597;gene-LOC100817768;gene-LOC100801568;gene-LOC100306323;gene-GMNF-YC06;gene-L…
GO:0003735	structural constituent of ribosome	Molecular Function	294	619	3.50792e-09	2.16138e-12	gene-LOC106797809;gene-LOC100799648;gene-LOC100775561;gene-LOC100792247;gene-LOC100810086;gene-LOC100499680;gene-LOC100779071;gene-LOC100778713;gene-LOC100787337;gene-LOC100806820;gene-LOC100499937;gene-LOC100499789;gene-LOC100306213;gene-RPL2;gene-LOC100816874;gene-LOC100799973;gene-LOC100805664;gene-LOC100306009;gene-LOC100305645;gene-LOC100807649;gene-LOC100810082;gene-LOC100813518;gene-LOC100…
GO:0008017	microtubule binding	Molecular Function	152	327	7.55353e-09	4.65405e-12	gene-LOC100813479;gene-LOC100785173;gene-LOC100780066;gene-LOC100820294;gene-LOC100800246;gene-LOC100777734;gene-LOC100818630;gene-LOC100783382;gene-LOC100788335;gene-LOC100789455;gene-LOC100810661;gene-LOC100788498;gene-LOC100808026;gene-LOC100820012;gene-LOC100777089;gene-LOC100804879;gene-LOC100779873;gene-LOC100798109;Glycine_max_newGene_4431;gene-LOC100782834;gene-LOC100775793;gene-LOC100798…
GO:0047262	polygalacturonate 4-alpha-galacturonosyltransferase activity	Molecular Function	31	38	1.29011e-08	7.9489e-12	gene-LOC100811181;gene-LOC100813514;gene-LOC100777811;gene-LOC100809273;gene-LOC100816698;gene-LOC102664546;gene-LOC100802290;gene-LOC100802623;gene-LOC100778251;gene-LOC100785342;gene-LOC100818596;gene-LOC100805886;gene-LOC100798073;gene-LOC100817076;gene-LOC100784212;gene-LOC100813219;gene-LOC100795264;gene-LOC100794379;gene-LOC102666034;gene-LOC100786907;gene-LOC100817381;gene-LOC100801940;gen…
GO:0004739	pyruvate dehydrogenase (acetyl-transferring) activity	Molecular Function	15	15	7.36816e-06	4.53984e-09	gene-LOC100778279;gene-LOC100811207;gene-LOC100780826;Glycine_max_newGene_5834;gene-LOC100793091;gene-LOC100816737;gene-LOC100811513;gene-LOC100802573;gene-LOC100805001;gene-LOC100813933;gene-LOC100817577;gene-LOC100798407;gene-LOC100787512;gene-LOC100777306;gene-LOC100781250
GO:0005525	GTP binding	Molecular Function	177	455	0.000266601	1.64264e-07	gene-LOC100780006;gene-LOC100813878;gene-LOC100799021;gene-LOC100805534;gene-LOC100527786;gene-GMR1;gene-LOC100792329;gene-LOC100790459;gene-LOC100797931;gene-LOC547855;gene-LOC100811698;Glycine_max_newGene_3954;Glycine_max_newGene_6599;gene-LOC100777656;gene-LOC100527312;gene-LOC100809354;gene-LOC100781223;gene-LOC100781185;gene-LOC100813911;gene-LOC100785104;gene-LOC100795309;gene-LOC100801379;…
GO:0015078	hydrogen ion transmembrane transporter activity	Molecular Function	21	29	0.00124356	7.66214e-07	gene-LOC100781475;gene-LOC100306184;gene-LOC100804255;gene-LOC100527042;gene-LOC100787215;gene-LOC100499783;gene-LOC100798638;gene-LOC100803728;gene-LOC100500014;gene-LOC100786845;gene-LOC100778175;gene-LOC100777816;gene-LOC100798558;gene-LOC100527177;gene-LOC100815182;gene-LOC100527703;gene-LOC100527598;gene-LOC100812380;gene-LOC100306205;gene-LOC100500032;gene-LOC100500400
GO:0051015	actin filament binding	Molecular Function	54	109	0.00193953	1.19503e-06	gene-LOC100806987;gene-LOC100819436;gene-LOC100786418;gene-LOC100797955;gene-LOC100526982;gene-ADF1;gene-LOC100801857;gene-LOC100527688;gene-LOC100814445;gene-LOC100802614;gene-LOC100776808;gene-LOC100805073;gene-LOC100794702;gene-LOC100803795;gene-LOC100500501;gene-LOC100305720;gene-LOC100799696;gene-LOC100809968;gene-LOC100499953;gene-LOC100805133;gene-LOC100802004;gene-LOC100804820;gene-LOC100…
GO:0003924	GTPase activity	Molecular Function	136	347	0.00426353	2.62694e-06	gene-LOC100305599;gene-GPA1;gene-LOC100791062;gene-LOC100500031;gene-LOC100805035;gene-TUBB3;gene-LOC100779203;gene-LOC100820512;gene-LOC100799688;gene-LOC100801608;gene-LOC100789747;gene-LOC100527651;gene-LOC100817378;gene-LOC100791620;gene-LOC100787725;gene-LOC100786112;gene-LOC100790511;gene-LOC100813513;gene-LOC100819408;gene-GMR2;gene-LOC100527786;gene-GMR1;gene-LOC100813878;gene-LOC10078000…
GO:0003755	peptidyl-prolyl cis-trans isomerase activity	Molecular Function	54	114	0.010861	6.69191e-06	gene-GMCYP41;gene-GMCYP29;gene-LOC100499966;gene-LOC100809205;gene-GMCYP40;gene-GMCYP31;gene-LOC100781416;gene-GMCYP23;gene-GMCYP28;gene-LOC100810243;gene-LOC100305479;gene-LOC100801197;gene-GMCYP14;gene-LOC100803404;gene-GMCYP32;gene-LOC100305505;gene-LOC100527937;gene-LOC100779438;gene-GMCYP55;gene-GMCYP17;gene-LOC100815603;gene-GMCYP15;gene-LOC100778390;gene-GMCYP25;gene-GMCYP24;gene-GMCYP36;g…
GO:0046961	proton-transporting ATPase activity, rotational mechanism	Molecular Function	20	30	0.0171864	1.05893e-05	gene-LOC100780523;gene-LOC106794127;gene-LOC100788723;gene-LOC100810062;gene-LOC100793301;gene-LOC100790694;gene-LOC100499818;gene-LOC100800799;gene-LOC100305531;gene-LOC100808847;gene-LOC111064655;gene-LOC100813963;gene-LOC100801612;gene-LOC100796479;gene-LOC100814929;gene-LOC100500452;gene-LOC100780187;gene-LOC100775727;gene-LOC100796361;gene-LOC100779290
GO:0004128	cytochrome-b5 reductase activity, acting on NAD(P)H	Molecular Function	12	14	0.0173237	1.06739e-05	gene-GMCB5-A2;gene-LOC100788796;gene-LOC100306380;gene-LOC100812559;gene-LOC100500611;gene-LOC100806129;gene-LOC100819222;gene-LOC100816447;gene-LOC100805390;gene-LOC100781191;gene-LOC100306652;gene-LOC100809584
GO:0051287	NAD binding	Molecular Function	57	125	0.0256973	1.58332e-05	gene-LOC100806545;gene-LOC100796117;gene-LOC100810871;gene-LOC100788347;gene-LOC100807342;gene-LOC100775394;gene-LOC100810522;gene-LOC100801527;gene-LOC732655;gene-LOC100799344;gene-LOC100817216;gene-LOC100781465;gene-LOC100793819;gene-LOC100803962;gene-LOC547640;gene-LOC732571;gene-LOC100818219;gene-LOC100795823;gene-LOC100794772;gene-LOC100779623;gene-LOC100793496;gene-UGD1;gene-LOC100802280;ge…
GO:0005484	SNAP receptor activity	Molecular Function	34	64	0.0271129	1.67055e-05	gene-LOC100804155;gene-LOC100810956;gene-LOC100801744;gene-LOC100796579;gene-LOC100795077;gene-LOC100816145;gene-LOC100786429;gene-LOC100800991;gene-LOC100786529;gene-LOC100811494;gene-GOS12;gene-LOC100796741;gene-LOC100796477;gene-LOC100789318;gene-LOC100787129;gene-LOC100778493;gene-LOC100789659;gene-LOC100306329;gene-LOC100806698;gene-LOC100500007;gene-LOC100819710;gene-LOC100816016;gene-LOC10…
GO:0005200	structural constituent of cytoskeleton	Molecular Function	28	50	0.0414948	2.55667e-05	gene-LOC100807401;gene-LOC100818878;gene-LOC100818162;gene-LOC100781043;gene-LOC100814445;gene-TUBB3;gene-LOC100785622;gene-LOC100788253;gene-LOC100801608;gene-LOC100799688;gene-LOC100786598;gene-LOC100779027;gene-LOC100816898;gene-LOC100797652;gene-LOC100817997;gene-LOC100789289;gene-TUBB;gene-TUBB1;gene-LOC100784236;gene-LOC100781185;gene-LOC100819883;gene-LOC100798849;gene-LOC100781525;gene-TU…
GO:0015250	water channel activity	Molecular Function	21	34	0.0585688	3.60867e-05	gene-LOC100815583;gene-SPCP1;gene-LOC100812711;gene-LOC100818032;gene-LOC100817450;gene-LOC100820403;gene-PIP1;gene-LOC100793242;gene-LOC547794;gene-LOC100797632;gene-LOC100817754;gene-LOC100805863;gene-LOC100805635;gene-LOC100817292;gene-LOC100527338;gene-GMPIP1-6;gene-LOC100527509;gene-LOC100811447;gene-PIP;gene-LOC100796833;gene-LOC100782690
GO:0015631	tubulin binding	Molecular Function	26	46	0.06457	3.97843e-05	gene-LOC100793943;gene-GMIQD35;gene-LOC100818900;gene-LOC100788524;gene-LOC100786958;gene-GMIQD46;gene-GMIQD54;gene-LOC100804879;gene-GMIQD61;gene-GMIQD10;gene-GMIQD45;gene-GMIQD25;gene-LOC100797456;gene-LOC100813544;gene-GMIQD7;gene-LOC100793597;gene-LOC100798109;gene-LOC100782834;gene-LOC100789174;gene-LOC100500215;gene-GMIQD43;gene-GMIQD18;gene-GMIQD63;gene-GMIQD42;gene-LOC100807370;gene-LOC10…
GO:0046933	proton-transporting ATP synthase activity, rotational mechanism	Molecular Function	14	19	0.0692312	4.26563e-05	gene-LOC100797948;gene-LOC100499703;gene-LOC100813657;gene-LOC100819224;gene-ATPC;gene-LOC100799603;gene-LOC100499796;gene-LOC100526851;gene-LOC100780778;gene-LOC100790990;gene-LOC100306025;gene-LOC100797290;gene-LOC100789705;gene-LOC100790402
GO:0015165	pyrimidine nucleotide-sugar transmembrane transporter activity	Molecular Function	17	26	0.116698	7.19024e-05	gene-LOC100791591;gene-LOC100787400;gene-LOC100782949;gene-LOC100817042;gene-LOC100819763;gene-LOC100785614;Glycine_max_newGene_11041;gene-LOC100813464;gene-LOC100819087;gene-LOC100814056;gene-LOC100776520;gene-LOC100815055;gene-LOC100778544;gene-LOC100797956;gene-LOC100817995;gene-LOC100806704;gene-LOC100786532
GO:0031418	L-ascorbic acid binding	Molecular Function	19	31	0.160484	9.88808e-05	gene-LOC100795761;gene-LOC100820384;gene-LOC100816390;gene-LOC100806046;gene-LOC100785989;gene-LOC100783075;gene-LOC100796794;gene-LOC100820606;gene-LOC100775302;gene-LOC100775928;gene-LOC100818717;gene-LOC100798201;gene-LOC100527885;gene-LOC100819289;gene-LOC100818586;gene-LOC100812049;gene-LOC100818794;gene-LOC100805097;gene-LOC100526938
GO:0016757	transferase activity, transferring glycosyl groups	Molecular Function	121	324	0.180766	0.000111378	Glycine_max_newGene_925;gene-LOC100779860;gene-LOC100807616;gene-LOC100778263;gene-LOC100804935;gene-LOC100800373;gene-LOC100805969;gene-LOC100818659;gene-LOC100780085;gene-LOC100790409;gene-LOC100802582;gene-LOC100784931;gene-LOC100802240;gene-LOC100778054;gene-LOC100799111;gene-LOC100783054;gene-LOC100799251;gene-LOC100800040;gene-LOC100801794;gene-LOC100805608;gene-DGD2;gene-LOC100780899;gene-…
GO:0003777	microtubule motor activity	Molecular Function	73	180	0.237171	0.000146132	gene-LOC100812813;gene-LOC100805061;gene-LOC100782128;gene-LOC100806354;gene-LOC100796881;gene-LOC100780424;gene-LOC100787892;gene-LOC100787957;gene-LOC100817066;gene-LOC100786278;gene-LOC100793472;gene-LOC100788073;gene-LOC100784439;gene-LOC100788096;gene-LOC100813698;gene-LOC100785855;gene-LOC100795452;gene-LOC100815027;gene-LOC100807481;gene-LOC100808278;gene-LOC100798358;gene-LOC100786770;gen…
GO:0000287	magnesium ion binding	Molecular Function	81	206	0.358902	0.000221135	gene-LOC100811326;gene-LOC100803925;gene-LOC106798062;gene-LOC100780404;gene-LOC100778321;gene-LOC547752;gene-LOC100776984;gene-LOC100777629;gene-LOC100794730;gene-LOC100780166;gene-LOC100818193;gene-LOC100781158;gene-LOC100812830;gene-LOC100500040;gene-LOC100798203;gene-GMTPS2;gene-LOC100786103;gene-LOC100784203;gene-LOC100780644;gene-LOC100816688;gene-IDH;gene-LOC100792878;gene-LOC100817490;gen…
GO:0003688	DNA replication origin binding	Molecular Function	16	26	0.536845	0.000330773	gene-LOC100776255;gene-LOC100811639;gene-LOC100779248;gene-LOC100800649;gene-LOC100798547;gene-LOC100798779;gene-LOC100805788;gene-LOC100799441;gene-LOC100791302;gene-LOC100794021;gene-LOC100811545;gene-LOC100802903;gene-LOC100813006;gene-LOC100782586;gene-LOC100527758;gene-LOC100779483
GO:0004072	aspartate kinase activity	Molecular Function	6	6	0.74831	0.000461066	gene-LOC100803204;gene-LOC547546;gene-LOC100812202;gene-LOC100805860;gene-AK-HSDH;gene-LOC100792482
GO:0016841	ammonia-lyase activity	Molecular Function	6	6	0.74831	0.000461066	gene-GMPAL1.3;gene-GMPAL2.3;gene-GMPAL2.2;gene-GMPAL1.1;gene-GMPAL1.2;gene-GMPAL2.1
GO:0005198	structural molecule activity	Molecular Function	38	84	0.762022	0.000469515	gene-LOC100791801;gene-LOC100499730;gene-LOC547986;gene-LOC100778846;gene-LOC100818162;gene-LOC100776763;gene-LOC100786715;gene-LOC100814149;gene-LOC100784651;gene-LOC100802600;gene-LOC100812825;gene-LOC100794696;gene-LOC100783637;gene-LOC100804776;gene-LOC100802469;gene-LOC100814417;gene-LOC100787533;gene-LOC100780788;gene-COPE1;gene-LOC100802224;gene-LOC100527785;gene-LOC100797508;gene-LOC10078…
GO:0008289	lipid binding	Molecular Function	90	238	0.792085	0.000488038	gene-LOC100801191;gene-LOC100817318;gene-LOC100777506;gene-LOC100809075;gene-LOC100797904;gene-LOC100793455;gene-LOC100801492;gene-LOC100787972;gene-LOC100798958;gene-LOC100779499;gene-LOC100793658;gene-LOC100527133;gene-LOC100816218;gene-LOC100306166;gene-LOC100815286;gene-LOC100775781;gene-LOC100306214;gene-LOC100499750;gene-LOC100794400;gene-LOC100819310;gene-LOC100805161;gene-LOC100803299;gen…
GO:0005086	ARF guanyl-nucleotide exchange factor activity	Molecular Function	13	20	0.930896	0.000573565	gene-LOC100813389;gene-LOC100783833;gene-LOC100789674;gene-LOC100778814;gene-LOC100784083;gene-LOC100780239;gene-LOC100814692;gene-LOC100794995;gene-LOC100789988;gene-LOC100789153;gene-LOC100811766;gene-LOC100782540;gene-LOC100798955
GO:0030955	potassium ion binding	Molecular Function	15	25	1	0.00074502	gene-LOC100799747;gene-LOC100802271;gene-PK3;gene-LOC100803036;gene-LOC100815822;gene-LOC100809327;gene-LOC100787043;gene-LOC100781158;gene-LOC100804313;gene-LOC100780404;gene-LOC100818193;gene-LOC100807615;gene-LOC100797214;gene-LOC100780644;gene-LOC100776984
GO:0045548	phenylalanine ammonia-lyase activity	Molecular Function	7	8	1	0.000775748	gene-GMPAL2.2;gene-GMPAL2.3;gene-GMPAL1.2;gene-GMPAL1.1;gene-GMPAL2.4;gene-GMPAL1.3;gene-GMPAL2.1
GO:0005464	UDP-xylose transmembrane transporter activity	Molecular Function	7	8	1	0.000775748	gene-LOC100777499;gene-LOC100782555;Glycine_max_newGene_2688;gene-LOC100777883;gene-LOC100814737;gene-LOC100779737;gene-LOC100789517
GO:0004707	MAP kinase activity	Molecular Function	23	45	1	0.000779253	gene-LOC100780831;gene-LOC100781115;gene-LOC100802929;gene-LOC100305373;gene-LOC100781650;gene-LOC100814013;gene-LOC100795768;gene-LOC100798863;gene-LOC100784192;gene-MPK4B;gene-LOC100803024;gene-LOC100815293;gene-LOC100811862;gene-LOC100805830;gene-MAPK1;gene-LOC100799442;gene-LOC100783422;gene-LOC100811788;gene-LOC100788131;gene-LOC100790060;gene-LOC100793851;gene-MPK4A;gene-LOC100809984
GO:0016413	O-acetyltransferase activity	Molecular Function	44	103	1	0.00080092	gene-LOC100803650;gene-LOC100803167;gene-LOC100789791;gene-LOC100305942;gene-LOC100775841;gene-LOC100804622;gene-LOC100792371;gene-LOC100786668;gene-LOC100777725;gene-LOC100817694;gene-LOC100797317;gene-LOC100804200;gene-LOC100813837;gene-LOC100818476;gene-LOC100801798;gene-LOC100819457;gene-LOC100818177;gene-LOC100785578;gene-LOC100785873;gene-LOC100527506;gene-LOC100790014;gene-LOC100817514;gen…
GO:0016760	cellulose synthase (UDP-forming) activity	Molecular Function	30	64	1	0.000876762	gene-LOC100810567;gene-LOC100819146;gene-LOC100797597;gene-LOC112999362;gene-LOC100798759;gene-LOC100795671;gene-LOC100799375;gene-LOC100801955;gene-LOC100794515;gene-LOC100786644;gene-LOC100813900;gene-LOC100814262;gene-LOC100804687;gene-LOC100815436;gene-LOC100793104;gene-LOC100806786;gene-LOC100795809;gene-LOC100798193;gene-LOC100781996;gene-LOC100806522;gene-LOC100786824;gene-LOC100779834;gen…
GO:0032051	clathrin light chain binding	Molecular Function	8	10	1	0.000909576	gene-LOC100802224;gene-LOC100786715;gene-LOC100784651;gene-LOC100776763;gene-LOC100778846;gene-LOC100786617;gene-LOC547986;gene-LOC100808189
GO:0004560	alpha-L-fucosidase activity	Molecular Function	8	10	1	0.000909576	gene-LOC100817294;gene-LOC100775293;gene-LOC100810387;gene-LOC100805382;gene-LOC100807583;gene-LOC102670239;gene-LOC100777878;gene-LOC100808977
GO:0004743	pyruvate kinase activity	Molecular Function	15	26	1	0.0013099	gene-LOC100780644;gene-LOC100776984;gene-LOC100797214;gene-LOC100807615;gene-LOC100781158;gene-LOC100804313;gene-LOC100780404;gene-LOC100818193;gene-LOC100815822;gene-LOC100787043;gene-LOC100809327;gene-PK3;gene-LOC100803036;gene-LOC100799747;gene-LOC100802271
GO:0003756	protein disulfide isomerase activity	Molecular Function	19	36	1	0.00133941	gene-PDIM-1;gene-LOC100798225;gene-LOC100796355;gene-LOC100788687;gene-LOC100804924;gene-LOC100499960;gene-LOC100785630;gene-LOC100791778;gene-PDIS-2;gene-LOC100526845;gene-LOC100813728;gene-PDIL-2;gene-LOC100787595;gene-LOC100813627;gene-LOC100499858;gene-LOC100790223;gene-LOC100811253;gene-LOC100037471;gene-LOC100170705
GO:0008312	7S RNA binding	Molecular Function	12	19	1	0.00136429	gene-LOC100811698;gene-LOC100500606;gene-LOC100776490;gene-LOC100811012;gene-LOC100791472;gene-LOC100816486;gene-LOC100792778;gene-LOC100810125;gene-LOC100788603;gene-LOC100815799;gene-LOC100526909;gene-LOC100500453
GO:0008092	cytoskeletal protein binding	Molecular Function	29	63	1	0.00151217	gene-GMIQD54;gene-GMIQD46;gene-LOC100788524;gene-LOC100786958;gene-LOC100818900;gene-GMIQD35;gene-LOC100797456;gene-LOC100811853;gene-GMIQD25;gene-LOC100805150;gene-GMIQD45;gene-GMIQD10;gene-LOC100804879;gene-GMIQD61;gene-LOC100789174;gene-LOC100782834;gene-LOC100798109;gene-LOC100793597;gene-GMIQD7;gene-LOC100813544;gene-LOC100789319;gene-LOC100794002;gene-LOC100807370;gene-LOC100818162;gene-GMI…
GO:0031386	protein tag	Molecular Function	11	17	1	0.00164076	gene-LOC100797664;gene-LOC100800784;gene-LOC100794617;gene-LOC100306072;gene-LOC100306317;gene-LOC100500241;gene-LOC100306626;gene-LOC100785758;gene-LOC100792206;gene-LOC100798042;gene-LOC100527854
GO:0008137	NADH dehydrogenase (ubiquinone) activity	Molecular Function	11	17	1	0.00164076	gene-LOC100802267;gene-LOC100802040;gene-LOC100776683;gene-LOC100810522;gene-LOC100500489;gene-LOC100526873;gene-LOC100306450;gene-LOC100789832;gene-LOC100777389;gene-LOC100786583;gene-LOC100500270
GO:0008725	DNA-3-methyladenine glycosylase activity	Molecular Function	11	17	1	0.00164076	gene-LOC100785912;gene-LOC100814780;gene-LOC100811352;gene-LOC100810677;gene-LOC100790760;gene-LOC100783263;gene-LOC100813637;gene-LOC100805836;gene-LOC100801163;gene-LOC100791725;gene-LOC100788160
GO:0070403	NAD+ binding	Molecular Function	9	13	1	0.00225251	gene-LOC100170753;gene-LOC100787009;gene-LOC100784468;gene-LOC100782935;gene-LOC100809832;gene-LOC100783463;gene-LOC100813832;gene-LOC100818771;gene-LOC100803586
GO:0004332	fructose-bisphosphate aldolase activity	Molecular Function	9	13	1	0.00225251	gene-LOC100786504;gene-LOC100818383;gene-LOC100795446;gene-LOC100798677;gene-LOC100815070;gene-LOC100527532;gene-LOC100818915;gene-LOC100775844;gene-LOC100783089
GO:0004347	glucose-6-phosphate isomerase activity	Molecular Function	6	7	1	0.00245877	gene-LOC100809452;gene-LOC100791285;gene-LOC100807719;gene-LOC100791496;gene-LOC100818441;gene-LOC100798134
GO:0008318	protein prenyltransferase activity	Molecular Function	6	7	1	0.00245877	gene-LOC100790130;gene-LOC100807900;gene-LOC100783193;gene-LOC100797408;gene-LOC100780581;gene-LOC100811502
GO:0003878	ATP citrate synthase activity	Molecular Function	7	9	1	0.00264649	gene-LOC100795745;gene-LOC100787121;gene-LOC100818180;gene-LOC100800904;gene-LOC100796266;gene-LOC100812287;gene-LOC100787551
GO:0004252	serine-type endopeptidase activity	Molecular Function	74	200	1	0.00283794	gene-LOC100804040;gene-LOC100797543;gene-LOC100781249;gene-LOC100778645;gene-LOC102661726;gene-LOC100802878;gene-LOC100306121;gene-LOC100785827;gene-LOC100783877;gene-LOC100799654;gene-LOC100820194;gene-LOC100781173;gene-LOC100796650;gene-LOC100808511;gene-SUB1;gene-LOC100780538;gene-LOC100814261;gene-LOC100796787;gene-LOC100815930;gene-LOC100784999;gene-LOC100795195;Glycine_max_newGene_10967;gen…
GO:0050661	NADP binding	Molecular Function	40	98	1	0.00366844	gene-LOC732655;gene-LOC100796103;gene-LOC100803740;gene-LOC100817216;gene-LOC100817010;gene-LOC100810846;gene-LOC100793462;gene-LOC100807342;gene-LOC100793203;gene-LOC100812619;gene-LOC102668138;gene-LOC100815891;gene-GAPDH;gene-AK-HSDH;gene-LOC100804853;gene-LOC100811075;gene-LOC100818789;gene-LOC100781161;gene-LOC100783902;gene-LOC100802847;gene-LOC100815985;gene-LOC100819951;gene-LOC732571;gen…
GO:0005338	nucleotide-sugar transmembrane transporter activity	Molecular Function	9	14	1	0.00475276	gene-LOC100789517;gene-LOC100817847;gene-LOC100814737;gene-LOC100777883;gene-LOC100799112;gene-LOC100779737;gene-LOC100782555;gene-LOC100777499;Glycine_max_newGene_2688
GO:0052793	pectin acetylesterase activity	Molecular Function	9	14	1	0.00475276	gene-LOC100786972;gene-LOC100794453;gene-LOC100792819;gene-LOC100810716;gene-LOC100819978;gene-LOC100791571;gene-LOC100785270;gene-LOC100781246;gene-LOC100793403
GO:0000062	fatty-acyl-CoA binding	Molecular Function	9	14	1	0.00475276	gene-LOC100813431;gene-LOC100786884;gene-LOC100813240;gene-LOC100777579;gene-LOC100812452;gene-LOC100499892;gene-LOC100500327;gene-LOC100775953;gene-LOC100807200
GO:0044389	ubiquitin-like protein ligase binding	Molecular Function	20	42	1	0.00486748	gene-LOC100787262;Glycine_max_newGene_4097;gene-LOC100805974;gene-LOC100778680;gene-LOC100500241;gene-LOC100777561;gene-LOC100814664;gene-LOC100527864;gene-LOC100790186;gene-LOC100786905;Glycine_max_newGene_6;gene-LOC100820308;gene-LOC100818865;gene-LOC100812552;gene-LOC100777871;gene-LOC100775687;gene-LOC100809598;gene-LOC100813260;gene-LOC100306398;gene-LOC100818162
GO:0008553	hydrogen-exporting ATPase activity, phosphorylative mechanism	Molecular Function	20	42	1	0.00486748	gene-LOC100818043;gene-LOC100813963;gene-LOC100783509;gene-LOC100806580;gene-LOC100790694;gene-LOC100816905;gene-LOC100795836;Glycine_max_newGene_5318;Glycine_max_newGene_5319;gene-LOC100782459;gene-LOC100500452;gene-LOC100780187;gene-LOC547525;gene-LOC100785442;gene-LOC111064655;gene-LOC100812151;gene-LOC100499818;gene-LOC100802859;gene-LOC100306550;gene-LOC106794127
GO:0004470	malic enzyme activity	Molecular Function	8	12	1	0.0057133	gene-LOC100784112;gene-LOC100775394;gene-LOC100791514;gene-LOC100811081;gene-LOC100806545;gene-LOC100796117;gene-LOC100795823;gene-LOC100799344
GO:0004775	succinate-CoA ligase (ADP-forming) activity	Molecular Function	8	12	1	0.0057133	gene-LOC100818180;gene-LOC100780205;gene-LOC100527938;gene-LOC100795745;gene-LOC100787121;gene-LOC100812287;gene-LOC100787551;gene-LOC100800904
GO:0072542	protein phosphatase activator activity	Molecular Function	8	12	1	0.0057133	gene-LOC100808283;gene-LOC100781390;gene-LOC100775767;gene-LOC100806230;gene-LOC100785874;gene-LOC100795277;gene-LOC100775273;gene-LOC100814538
GO:0052636	arabinosyltransferase activity	Molecular Function	4	4	1	0.00597011	gene-LOC100789338;gene-LOC100780346;gene-LOC100776463;gene-LOC100819032
GO:0043495	protein anchor	Molecular Function	4	4	1	0.00597011	gene-LOC100814950;gene-LOC100777981;gene-LOC100796587;gene-LOC100813866
GO:0004379	glycylpeptide N-tetradecanoyltransferase activity	Molecular Function	4	4	1	0.00597011	gene-LOC100817419;gene-LOC100789104;gene-LOC100787291;gene-LOC100776780
GO:0004576	oligosaccharyl transferase activity	Molecular Function	4	4	1	0.00597011	gene-LOC100780916;gene-LOC100782502;gene-LOC100805873;gene-LOC100816018
GO:0036456	L-methionine-(S)-S-oxide reductase activity	Molecular Function	4	4	1	0.00597011	gene-LOC100527085;gene-LOC100792638;gene-LOC100782739;gene-LOC100802671
GO:0004512	inositol-3-phosphate synthase activity	Molecular Function	4	4	1	0.00597011	gene-LOC100800820;gene-MIPS;gene-LOC106797152;gene-MIPS4
GO:0010242	oxygen evolving activity	Molecular Function	4	4	1	0.00597011	gene-LOC100820458;gene-LOC100811386;gene-LOC100798485;gene-LOC100792252
GO:0004610	phosphoacetylglucosamine mutase activity	Molecular Function	4	4	1	0.00597011	Glycine_max_newGene_2079;gene-LOC100804530;gene-LOC106794258;gene-LOC100806886
GO:0004047	aminomethyltransferase activity	Molecular Function	4	4	1	0.00597011	gene-LOC100809241;Glycine_max_newGene_2593;gene-LOC100778188;gene-LOC100800509
GO:0004318	enoyl-[acyl-carrier-protein] reductase (NADH) activity	Molecular Function	4	4	1	0.00597011	gene-LOC100810475;gene-LOC100777266;gene-LOC100779679;gene-LOC100785606
GO:0004579	dolichyl-diphosphooligosaccharide-protein glycotransferase activity	Molecular Function	4	4	1	0.00597011	gene-LOC100814638;gene-LOC100796192;gene-LOC100817203;gene-LOC100817179
GO:0004298	threonine-type endopeptidase activity	Molecular Function	23	51	1	0.00610211	gene-LOC100802854;gene-LOC100793282;gene-LOC100306084;gene-LOC100779240;gene-LOC100808731;gene-LOC100820387;gene-LOC100810291;gene-LOC100790481;gene-LOC100527174;gene-LOC100527499;gene-LOC100786457;gene-LOC100799919;gene-LOC100819051;gene-LOC100792921;gene-LOC100305513;gene-LOC102662733;gene-LOC100499664;gene-LOC100795748;gene-LOC100527027;gene-LOC100527630;gene-LOC100306148;gene-LOC100796147;gen…
GO:0008121	ubiquinol-cytochrome-c reductase activity	Molecular Function	7	10	1	0.0066993	gene-LOC100500024;gene-LOC100792906;gene-LOC100798615;gene-LOC100806917;gene-LOC100799135;gene-LOC100500582;gene-LOC100500486
GO:0070696	transmembrane receptor protein serine/threonine kinase binding	Molecular Function	7	10	1	0.0066993	gene-LOC100818900;gene-LOC100808483;gene-LOC100780150;gene-LOC100794002;gene-LOC100807370;gene-LOC100788575;gene-LOC100796864
GO:0004345	glucose-6-phosphate dehydrogenase activity	Molecular Function	7	10	1	0.0066993	gene-LOC100815891;gene-LOC100793694;gene-LOC100801945;gene-LOC100796541;gene-LOC100811075;gene-LOC100793462;gene-G6PDH
GO:0004017	adenylate kinase activity	Molecular Function	10	17	1	0.00711553	gene-LOC100777369;gene-LOC100790268;gene-LOC100791848;gene-LOC100818561;gene-LOC100796331;gene-LOC100818830;gene-LOC100784319;gene-LOC100814972;gene-LOC100784021;gene-LOC100779881
GO:0048040	UDP-glucuronate decarboxylase activity	Molecular Function	6	8	1	0.00750783	gene-LOC100783463;gene-LOC100813832;gene-LOC100818771;gene-LOC100782935;gene-LOC100787009;gene-LOC100809832
GO:0004506	squalene monooxygenase activity	Molecular Function	6	8	1	0.00750783	gene-LOC100810547;gene-LOC100808856;gene-LOC100820031;gene-LOC100795522;gene-LOC100804406;gene-LOC100795027
GO:0004449	isocitrate dehydrogenase (NAD+) activity	Molecular Function	5	6	1	0.00764967	gene-LOC100777867;gene-LOC100800050;gene-LOC100781465;gene-LOC100811326;gene-LOC100790110
GO:0004742	dihydrolipoyllysine-residue acetyltransferase activity	Molecular Function	5	6	1	0.00764967	gene-LOC100786455;gene-LOC100778218;gene-LOC100799926;gene-LOC100813087;gene-LOC100804938
GO:0035064	methylated histone binding	Molecular Function	5	6	1	0.00764967	gene-LOC100526864;gene-LOC100819331;gene-LOC100811464;gene-LOC100782880;gene-LOC100800393
GO:0016018	cyclosporin A binding	Molecular Function	11	20	1	0.00940179	gene-GMCYP40;gene-GMCYP16;gene-GMCYP23;gene-GMCYP17;gene-GMCYP36;gene-GMCYP14;gene-GMCYP41;gene-GMCYP2;gene-GMCYP11;gene-GMCYP25;gene-GMCYP28
GO:0016407	acetyltransferase activity	Molecular Function	11	20	1	0.00940179	gene-LOC100811441;gene-LOC100796855;gene-LOC102664482;gene-LOC100794337;gene-LOC100778218;gene-LOC100809303;gene-LOC100787763;gene-LOC100788136;gene-LOC100818476;gene-LOC100789791;gene-LOC100776242
GO:0004634	phosphopyruvate hydratase activity	Molecular Function	8	13	1	0.0112506	gene-LOC547752;gene-LOC100809646;gene-LOC100787663;gene-LOC100787451;gene-LOC100803925;gene-LOC100811084;gene-LOC100806538;gene-LOC100789125
GO:0016872	intramolecular lyase activity	Molecular Function	8	13	1	0.0112506	gene-GMCHI3B1;gene-CHI1A;gene-GMCHI4A;gene-GMCHI3A1;gene-GMCHI3A2;gene-CHI2-A;gene-GMCHI3B2;gene-CHI1B2
GO:0004550	nucleoside diphosphate kinase activity	Molecular Function	8	13	1	0.0112506	gene-LOC100778161;gene-LOC100818830;gene-LOC547709;gene-LOC100527141;gene-LOC100500470;gene-LOC100796331;gene-LOC100500478;gene-LOC547870
GO:0003872	6-phosphofructokinase activity	Molecular Function	12	23	1	0.0115106	gene-LOC100807957;gene-LOC100815278;gene-LOC100793844;gene-LOC100782857;gene-LOC100780164;gene-LOC100793883;gene-LOC100800863;gene-LOC100818755;gene-LOC100804429;gene-LOC100797925;gene-LOC100803139;gene-LOC100819847
GO:0004553	hydrolase activity, hydrolyzing O-glycosyl compounds	Molecular Function	88	256	1	0.0122361	Glycine_max_newGene_6564;gene-LOC100811671;gene-LOC100802367;gene-LOC100810169;gene-LOC100813465;gene-LOC100792948;gene-LOC100775918;gene-LOC100813344;gene-LOC100786906;gene-LOC100814337;gene-LOC100792073;Glycine_max_newGene_5424;gene-LOC547802;gene-LOC100804710;gene-LOC100789267;gene-LOC100813539;gene-LOC100803406;gene-LOC100794295;gene-LOC100778482;gene-LOC100809047;gene-LOC100775557;gene-LOC10…
GO:0004143	diacylglycerol kinase activity	Molecular Function	7	11	1	0.0140159	gene-LOC100801004;gene-LOC100813809;gene-LOC100816144;gene-LOC100808353;gene-LOC100817198;gene-LOC100811680;gene-LOC100794891
GO:0003999	adenine phosphoribosyltransferase activity	Molecular Function	7	11	1	0.0140159	gene-LOC100777103;gene-LOC100499904;gene-LOC100306411;gene-LOC100810609;gene-LOC100305792;gene-LOC100775389;gene-LOC100526858
GO:0008097	5S rRNA binding	Molecular Function	11	21	1	0.0148444	gene-LOC100779285;gene-LOC100785668;gene-LOC100805468;gene-LOC100786189;gene-LOC100818819;gene-LOC100809143;gene-LOC100812032;gene-LOC100805868;gene-LOC100817746;gene-LOC100804348;gene-LOC100803727
GO:0016759	cellulose synthase activity	Molecular Function	14	29	1	0.015061	gene-LOC100798759;gene-LOC100794515;gene-LOC100784207;gene-LOC100796374;Glycine_max_newGene_10025;gene-LOC100789821;gene-LOC100806522;gene-LOC100819146;gene-LOC100781996;gene-LOC100798193;gene-LOC100795671;gene-LOC100795809;gene-LOC100810567;gene-LOC100793104
GO:0004362	glutathione-disulfide reductase activity	Molecular Function	6	9	1	0.0172305	gene-LOC100783766;gene-LOC100527634;gene-LOC100500348;gene-LOC100810846;gene-LOC100777703;gene-LOC100305517
GO:0046556	alpha-L-arabinofuranosidase activity	Molecular Function	12	24	1	0.0172822	gene-LOC100786744;gene-LOC100780688;gene-LOC100783150;gene-LOC100801565;gene-LOC100781521;gene-LOC100812757;gene-LOC100787734;gene-LOC100809501;gene-LOC100805839;gene-LOC100789316;gene-LOC100792948;gene-LOC100791803
GO:0047134	protein-disulfide reductase activity	Molecular Function	12	24	1	0.0172822	gene-LOC100814030;gene-LOC100305959;gene-LOC100527081;gene-LOC100527038;gene-LOC100811845;gene-LOC100306601;gene-LOC100526924;gene-LOC100784029;gene-LOC100305596;gene-LOC100802971;gene-LOC100499858;gene-LOC100813627
GO:0004427	inorganic diphosphatase activity	Molecular Function	12	24	1	0.0172822	gene-LOC100527574;gene-LOC100784465;gene-LOC100798544;gene-LOC100793677;gene-LOC100306258;gene-LOC100306101;gene-LOC100787805;gene-LOC100784203;gene-LOC100775864;gene-LOC100527417;Glycine_max_newGene_1414;gene-LOC100500040
GO:0051537	2 iron, 2 sulfur cluster binding	Molecular Function	25	61	1	0.0179735	gene-LOC100800358;gene-LOC100783951;gene-LOC100813636;gene-LOC100806917;gene-LOC100500372;gene-LOC100799420;gene-LOC100526856;gene-LOC100305932;gene-LOC100811801;Glycine_max_newGene_7186;gene-PETC;gene-LOC100798615;Glycine_max_newGene_2696;gene-LOC100799135;gene-LOC100815377;gene-LOC100808254;gene-LOC100527610;gene-LOC100305886;gene-LOC100800521;gene-LOC100786050;gene-LOC100812604;gene-LOC1007859…
GO:0004029	aldehyde dehydrogenase (NAD) activity	Molecular Function	10	19	1	0.0191955	gene-LOC100816920;gene-LOC100800699;gene-LOC100811501;gene-LOC100802990;Glycine_max_newGene_7741;gene-LOC100786773;gene-LOC100797873;gene-LOC100798892;gene-LOC100527654;gene-LOC100783920
GO:0004535	poly(A)-specific ribonuclease activity	Molecular Function	10	19	1	0.0191955	gene-LOC100808935;gene-LOC100776413;gene-LOC100805583;gene-LOC100807026;gene-LOC100783415;gene-LOC100799461;gene-LOC100781759;gene-LOC100790027;gene-LOC100806559;gene-LOC100500357
GO:0016671	oxidoreductase activity, acting on a sulfur group of donors, disulfide as acceptor	Molecular Function	13	27	1	0.019374	gene-LOC100798225;gene-LOC100814030;gene-LOC100527038;gene-LOC100527081;gene-LOC100811845;gene-LOC100784029;gene-LOC100306601;gene-LOC100526924;gene-LOC100305596;gene-LOC100802971;gene-LOC100813627;gene-LOC100499858;gene-LOC547630
GO:0009044	xylan 1,4-beta-xylosidase activity	Molecular Function	8	14	1	0.0199143	gene-LOC100801565;gene-LOC100789316;gene-LOC100792948;gene-LOC100812757;gene-LOC100786744;gene-LOC100780688;gene-LOC100805839;gene-LOC100809501
GO:0004724	magnesium-dependent protein serine/threonine phosphatase activity	Molecular Function	38	101	1	0.0201741	Glycine_max_newGene_10960;gene-LOC100817563;gene-LOC100790374;gene-LOC100816201;gene-LOC100815245;gene-LOC100782003;gene-LOC100806476;gene-LOC100807886;gene-LOC100807235;gene-LOC100781388;gene-LOC100808304;gene-LOC100775371;gene-LOC100813810;gene-LOC100810538;gene-LOC100776518;gene-LOC100811922;gene-LOC100778238;gene-LOC100812974;gene-LOC100812137;gene-LOC100813306;gene-LOC100782634;gene-LOC10078…
GO:0004127	cytidylate kinase activity	Molecular Function	5	7	1	0.0206269	gene-LOC100796331;gene-LOC100306603;gene-LOC100500111;gene-LOC100777369;gene-LOC100818830
GO:0003886	DNA (cytosine-5-)-methyltransferase activity	Molecular Function	5	7	1	0.0206269	gene-LOC100799480;gene-LOC100818307;gene-LOC100798061;gene-LOC100797667;gene-LOC100802765
GO:0042282	hydroxymethylglutaryl-CoA reductase activity	Molecular Function	5	7	1	0.0206269	gene-LOC100777317;gene-LOC100786956;gene-LOC100811237;gene-LOC100779932;gene-LOC100784330
GO:0004802	transketolase activity	Molecular Function	3	3	1	0.0214802	gene-LOC100781676;gene-LOC100805786;gene-LOC100818028
GO:0004573	mannosyl-oligosaccharide glucosidase activity	Molecular Function	3	3	1	0.0214802	gene-LOC100795691;Glycine_max_newGene_2066;gene-LOC100795161
GO:0080132	fatty acid alpha-hydroxylase activity	Molecular Function	3	3	1	0.0214802	gene-LOC100783704;gene-LOC100820263;gene-LOC100784159
GO:0047517	1,4-beta-D-xylan synthase activity	Molecular Function	3	3	1	0.0214802	gene-LOC100797597;gene-LOC100800085;gene-LOC100797122
GO:0042834	peptidoglycan binding	Molecular Function	3	3	1	0.0214802	Glycine_max_newGene_5278;gene-LOC100808966;gene-LOC100777292
GO:0005539	glycosaminoglycan binding	Molecular Function	3	3	1	0.0214802	Glycine_max_newGene_5278;gene-LOC100777292;gene-LOC100808966
GO:0004758	serine C-palmitoyltransferase activity	Molecular Function	3	3	1	0.0214802	gene-LOC100785505;gene-LOC100803194;gene-LOC100789635
GO:0045153	electron transporter, transferring electrons within CoQH2-cytochrome c reductase complex activity	Molecular Function	3	3	1	0.0214802	gene-LOC100777056;gene-LOC100796742;gene-LOC100803087
GO:0030295	protein kinase activator activity	Molecular Function	3	3	1	0.0214802	gene-LOC100801741;gene-LOC100791962;gene-LOC100785976
GO:0001158	enhancer sequence-specific DNA binding	Molecular Function	3	3	1	0.0214802	gene-GT-2B;gene-LOC100795995;gene-LOC100801868
GO:0035326	enhancer binding	Molecular Function	3	3	1	0.0214802	gene-GT-2B;gene-LOC100795995;gene-LOC100801868
GO:0048531	beta-1,3-galactosyltransferase activity	Molecular Function	3	3	1	0.0214802	gene-LOC100776715;gene-LOC100793793;gene-LOC100804402
GO:0047800	cysteamine dioxygenase activity	Molecular Function	3	3	1	0.0214802	gene-LOC100805101;gene-LOC100807889;gene-LOC100777850
GO:0004648	O-phospho-L-serine:2-oxoglutarate aminotransferase activity	Molecular Function	3	3	1	0.0214802	gene-LOC100795286;gene-LOC100798600;gene-LOC100779355
GO:0004013	adenosylhomocysteinase activity	Molecular Function	3	3	1	0.0214802	gene-LOC100786939;gene-LOC100787210;gene-LOC100815953
GO:0031682	G-protein gamma-subunit binding	Molecular Function	3	3	1	0.0214802	gene-LOC100811645;gene-LOC100794776;gene-LOC100787237
GO:0016616	oxidoreductase activity, acting on the CH-OH group of donors, NAD or NADP as acceptor	Molecular Function	30	77	1	0.0220943	gene-LOC100809809;gene-LOC100801553;gene-LOC100816854;gene-LOC100806814;gene-LOC100809416;gene-LOC100807617;gene-LOC100796771;gene-LOC100804892;gene-LOC102662120;gene-LOC100795575;gene-LOC100799994;gene-LOC100137082;gene-LOC100820588;gene-LOC100800492;gene-ANR1;gene-LOC100802847;gene-LOC100777124;gene-LOC100776273;gene-LOC100784676;gene-LOC100803241;gene-LOC100779140;gene-LOC547570;gene-LOC100793…
GO:0016308	1-phosphatidylinositol-4-phosphate 5-kinase activity	Molecular Function	11	22	1	0.022348	gene-LOC100789949;gene-LOC100790049;gene-LOC100789427;gene-LOC100794706;gene-LOC100810432;gene-LOC100801603;gene-LOC100780680;gene-LOC100782430;gene-LOC100808235;gene-LOC100800418;gene-LOC100789188
GO:0019901	protein kinase binding	Molecular Function	27	68	1	0.0223783	gene-LOC100790062;gene-LOC100499696;gene-LOC100814445;gene-LOC100778117;Glycine_max_newGene_10377;gene-LOC100790459;gene-HIR1;gene-ROP10;gene-LOC100305689;gene-LOC100804982;gene-LOC100306559;gene-LOC100789856;gene-LOC100527158;gene-LOC100785464;gene-LOC100778254;gene-LOC100527464;gene-LOC100811808;gene-LOC100810094;gene-LOC100805035;gene-LOC100803222;gene-LOC100790880;gene-LOC100789295;gene-LOC10…
GO:0004020	adenylylsulfate kinase activity	Molecular Function	4	5	1	0.0232139	gene-LOC100794000;gene-LOC100500116;gene-LOC100777457;gene-LOC100793200
GO:0004419	hydroxymethylglutaryl-CoA lyase activity	Molecular Function	4	5	1	0.0232139	gene-LOC100788349;gene-LOC100801507;gene-LOC100777073;gene-LOC100817457
GO:0004421	hydroxymethylglutaryl-CoA synthase activity	Molecular Function	4	5	1	0.0232139	gene-LOC100782595;gene-LOC100777679;gene-LOC100780554;gene-LOC100788028
GO:0004767	sphingomyelin phosphodiesterase activity	Molecular Function	4	5	1	0.0232139	gene-LOC100305824;gene-LOC100785104;gene-LOC100790511;gene-LOC100527651
GO:0022821	potassium ion antiporter activity	Molecular Function	4	5	1	0.0232139	gene-LOC100798192;gene-LOC100811644;gene-LOC100800124;gene-LOC100815467
GO:0018478	malonate-semialdehyde dehydrogenase (acetylating) activity	Molecular Function	4	5	1	0.0232139	gene-LOC100791508;gene-LOC100783569;gene-LOC100796803;gene-LOC100811544
GO:0070182	DNA polymerase binding	Molecular Function	4	5	1	0.0232139	gene-LOC100808801;gene-LOC100794715;gene-LOC100778818;gene-LOC100792904
GO:0004450	isocitrate dehydrogenase (NADP+) activity	Molecular Function	4	5	1	0.0232139	gene-LOC100786103;gene-IDH;gene-IDH1;gene-LOC100816688
GO:0016813	hydrolase activity, acting on carbon-nitrogen (but not peptide) bonds, in linear amidines	Molecular Function	4	5	1	0.0232139	gene-LOC100797579;gene-AAH;gene-LOC100781644;Glycine_max_newGene_10014
GO:0016251	obsolete general RNA polymerase II transcription factor activity	Molecular Function	4	5	1	0.0232139	gene-LOC100799998;gene-LOC100783444;gene-LOC100788777;gene-LOC100803416
GO:0004616	phosphogluconate dehydrogenase (decarboxylating) activity	Molecular Function	4	5	1	0.0232139	gene-LOC100818789;gene-LOC100796103;gene-LOC100803740;gene-GND
GO:0017040	ceramidase activity	Molecular Function	4	5	1	0.0232139	gene-LOC100788589;gene-LOC100781840;gene-LOC100810626;gene-LOC100802481
GO:0046863	ribulose-1,5-bisphosphate carboxylase/oxygenase activator activity	Molecular Function	4	5	1	0.0232139	gene-RCAALPHA;gene-RCABETA;gene-RCA11;gene-RCA14
GO:0016985	mannan endo-1,4-beta-mannosidase activity	Molecular Function	9	17	1	0.0249012	gene-LOC100811794;gene-LOC100784013;gene-LOC100783510;gene-LOC100805357;gene-LOC100811461;gene-LOC100817974;gene-LOC100805627;gene-LOC100789254;gene-LOC100794126
GO:0097367	carbohydrate derivative binding	Molecular Function	17	40	1	0.0322649	gene-LOC100500682;gene-LOC100804158;gene-LOC100808966;gene-LOC100805755;gene-LOC100777292;gene-LOC100527623;gene-LOC100775953;gene-LOC100810796;gene-LOC100306535;gene-LOC100792611;gene-LOC100784482;Glycine_max_newGene_5278;gene-LOC100807200;gene-LOC100779312;gene-LOC100805150;gene-LOC100780156;gene-GF14A
GO:0003690	double-stranded DNA binding	Molecular Function	38	104	1	0.032277	gene-LOC100793697;Glycine_max_newGene_4058;gene-LOC100527758;gene-LOC100499955;gene-LOC100778090;gene-LOC100804440;gene-LOC548080;gene-LOC100799629;gene-LOC100793256;gene-LOC102661687;gene-LOC102667698;gene-LOC100806386;gene-LOC100803968;gene-GT-2B;gene-LOC100810590;gene-LOC102664297;gene-LOC100788221;gene-LOC100815140;gene-LOC100818448;gene-LOC100795995;gene-LOC100809590;gene-LOC100813396;gene-L…
GO:0004791	thioredoxin-disulfide reductase activity	Molecular Function	11	23	1	0.0322823	gene-LOC100813627;gene-LOC100499858;gene-LOC100784029;gene-LOC100527081;gene-LOC100527038;gene-LOC100814030;gene-LOC100786086;gene-LOC100819254;gene-LOC100790557;gene-LOC100810846;gene-LOC100794561
GO:0004602	glutathione peroxidase activity	Molecular Function	8	15	1	0.032427	gene-LOC100808523;gene-LOC100306295;gene-LOC100527297;gene-LOC100306570;gene-LOC100306590;gene-LOC113001172;gene-LOC100306136;gene-LOC100527421
GO:1990757	ubiquitin ligase activator activity	Molecular Function	6	10	1	0.0330273	gene-CCS52;gene-LOC100785726;gene-LOC100808928;gene-LOC100800467;gene-LOC100784841;gene-LOC100780928
GO:0003979	UDP-glucose 6-dehydrogenase activity	Molecular Function	6	10	1	0.0330273	gene-LOC100820448;gene-LOC100810907;gene-UGD1;gene-LOC100802280;gene-LOC100803962;gene-LOC100799142
GO:0042285	xylosyltransferase activity	Molecular Function	6	10	1	0.0330273	gene-LOC100804618;gene-PGLCAT8;gene-LOC100782450;gene-LOC100777749;gene-LOC100808765;gene-LOC100785607
GO:0030942	endoplasmic reticulum signal peptide binding	Molecular Function	6	10	1	0.0330273	gene-LOC100815799;gene-LOC100500453;gene-LOC100526909;gene-LOC100811698;gene-LOC100792778;gene-LOC100816486
GO:0004351	glutamate decarboxylase activity	Molecular Function	6	10	1	0.0330273	gene-LOC100783047;gene-LOC100787167;gene-GAD;gene-LOC100796475;gene-LOC100791696;gene-GAD-2
GO:0043015	gamma-tubulin binding	Molecular Function	6	10	1	0.0330273	gene-LOC100819794;gene-LOC100780017;gene-LOC100782299;gene-LOC100795585;gene-LOC100786441;Glycine_max_newGene_10983
GO:0008168	methyltransferase activity	Molecular Function	84	253	1	0.033441	gene-LOC100799841;gene-LOC100820623;gene-LOC100812467;gene-LOC102659364;gene-LOC100796978;gene-LOC100789973;gene-LOC100817472;gene-LOC100788766;gene-LOC100819297;gene-LOC100788069;gene-LOC100811384;gene-LOC100812239;gene-LOC100500304;gene-LOC100813493;gene-LOC100789198;gene-LOC100788504;gene-LOC100809916;gene-LOC100810799;gene-LOC100798553;gene-LOC100799195;gene-LOC100779883;gene-LOC100786204;gen…
GO:0016627	oxidoreductase activity, acting on the CH-CH group of donors	Molecular Function	12	26	1	0.0349	gene-LOC100779933;gene-LOC100780327;gene-LOC100780288;gene-LOC100798454;Glycine_max_newGene_5400;gene-LOC100527396;gene-LOC100785393;gene-LOC100807179;gene-LOC100784443;gene-LOC100499683;gene-LOC100814603;gene-LOC100797930
GO:0005507	copper ion binding	Molecular Function	49	140	1	0.037221	gene-LOC100806689;gene-LOC100817473;gene-LOC100811543;gene-LOC100788318;gene-LOC100779825;gene-LOC100810923;gene-LOC100799744;gene-LOC100775521;gene-LOC100792688;gene-LOC100808948;gene-LOC100777925;gene-LOC100819511;gene-LOC100811534;gene-LOC100796779;gene-LOC100811833;gene-LOC100776222;gene-LOC100812416;gene-LOC100775285;gene-LOC100775325;gene-PAO1;gene-LOC100798164;gene-LOC100785096;gene-LOC100…
GO:0015095	magnesium ion transmembrane transporter activity	Molecular Function	14	32	1	0.0385369	gene-LOC100819228;gene-LOC100810239;gene-LOC100807024;gene-LOC100778788;gene-LOC100799368;gene-LOC100793445;gene-LOC100804175;gene-LOC100812264;gene-LOC100788454;gene-LOC100779611;gene-LOC100786220;gene-LOC100807502;gene-LOC100799756;gene-LOC100812149
GO:0016157	sucrose synthase activity	Molecular Function	10	21	1	0.0418481	gene-LOC100793371;gene-LOC100806761;Glycine_max_newGene_2655;Glycine_max_newGene_8332;gene-LOC100806543;gene-GMSS;gene-LOC100819730;gene-LOC100807527;gene-LOC100788717;gene-SS
GO:0005199	structural constituent of cell wall	Molecular Function	7	13	1	0.0424267	gene-LOC100814585;gene-PRP1;gene-LOC547527;gene-LOC100808321;gene-PRP3;gene-LOC100782090;Glycine_max_newGene_4811
GO:0015018	galactosylgalactosylxylosylprotein 3-beta-glucuronosyltransferase activity	Molecular Function	7	13	1	0.0424267	gene-LOC100782450;gene-PGLCAT8;gene-LOC100804618;gene-LOC100809892;gene-LOC100777749;gene-LOC100785607;gene-LOC100808765
GO:0052691	UDP-arabinopyranose mutase activity	Molecular Function	5	8	1	0.0424921	gene-LOC100784882;gene-LOC100783948;gene-LOC100809983;gene-LOC100788017;gene-LOC100816315
GO:0004365	glyceraldehyde-3-phosphate dehydrogenase (NAD+) (phosphorylating) activity	Molecular Function	5	8	1	0.0424921	gene-LOC100807342;gene-GAPDH;gene-LOC100815649;gene-LOC732571;gene-LOC100781161
GO:0047769	arogenate dehydratase activity	Molecular Function	5	8	1	0.0424921	gene-LOC100787387;gene-LOC100800074;gene-LOC100809331;gene-LOC100797636;gene-LOC100781285
GO:0047334	diphosphate-fructose-6-phosphate 1-phosphotransferase activity	Molecular Function	5	8	1	0.0424921	gene-LOC100819847;gene-LOC100800863;gene-LOC100797925;gene-LOC100782857;gene-LOC100804429
GO:0005459	UDP-galactose transmembrane transporter activity	Molecular Function	5	8	1	0.0424921	gene-LOC100812669;gene-LOC100817042;gene-LOC100817847;gene-LOC100786532;gene-LOC100811913
GO:0008308	voltage-gated anion channel activity	Molecular Function	11	24	1	0.0449747	gene-LOC100777928;gene-LOC100784432;gene-LOC100170728;gene-LOC100790270;gene-LOC100797369;gene-LOC100790578;gene-LOC100787061;gene-LOC100787662;gene-LOC100818855;gene-LOC100805016;gene-LOC100170756
GO:0019905	syntaxin binding	Molecular Function	11	24	1	0.0449747	gene-LOC100810735;gene-LOC100783306;gene-LOC100817329;gene-LOC100782049;gene-LOC100804432;gene-LOC100815044;gene-LOC100793138;gene-LOC100790986;gene-LOC100792796;gene-SNAP18;gene-LOC100795213
GO:0003951	NAD+ kinase activity	Molecular Function	12	27	1	0.0473208	gene-LOC100813809;gene-LOC100792824;gene-LOC100816144;gene-LOC100801004;gene-LOC100800104;gene-LOC100808353;gene-LOC100805656;gene-LOC100788629;gene-LOC100782844;gene-LOC100811680;gene-LOC100794891;gene-LOC100817198
GO:0044183	protein binding involved in protein folding	Molecular Function	13	30	1	0.0490427	gene-GMBIP4;gene-LOC100787543;gene-LOC100786585;gene-LOC100812707;gene-LOC100526969;gene-LOC547838;gene-GMBIP2;gene-LOC100499735;gene-LOC100777767;gene-LOC100803843;gene-LOC100812005;gene-LOC100818633;gene-LOC100526846
GO:0031492	nucleosomal DNA binding	Molecular Function	8	16	1	0.0493687	gene-LOC102660898;gene-LOC100305747;gene-LOC100802642;gene-LOC100795994;gene-LOC548080;gene-LOC100803968;gene-LOC100810590;gene-LOC100793697
GO:0008526	phosphatidylinositol transporter activity	Molecular Function	8	16	1	0.0493687	gene-LOC100775995;gene-LOC100777065;gene-LOC100790867;gene-LOC100802091;gene-LOC100782334;gene-LOC100797297;gene-LOC100785793;gene-LOC100783495
GO:0016791	phosphatase activity	Molecular Function	22	57	1	0.050342	gene-LOC100814193;gene-LOC100789290;gene-LOC100800012;gene-LOC100810787;gene-LOC100777603;gene-LOC100794137;gene-LOC100806524;gene-LOC100808918;gene-LOC100785272;gene-LOC100789743;gene-LOC100781541;gene-LOC100785357;gene-LOC100820476;gene-LOC100798113;gene-LOC100815584;gene-LOC100798495;gene-LOC100306472;gene-LOC100786174;gene-LOC100783292;gene-LOC100804369;gene-LOC100305976;gene-LOC100795122
GO:0061631	ubiquitin conjugating enzyme activity	Molecular Function	21	54	1	0.050874	gene-LOC100805577;gene-LOC100499741;gene-LOC100817810;gene-LOC100805631;gene-LOC100806291;gene-LOC100809740;gene-LOC100787053;gene-LOC100527105;gene-LOC100789495;gene-LOC100810772;gene-LOC100527458;gene-LOC100798396;gene-LOC100809853;gene-LOC100306222;gene-LOC100811370;gene-LOC100804054;gene-LOC100802605;gene-LOC100789952;gene-LOC100813446;gene-LOC100305664;gene-LOC100527756
GO:0004565	beta-galactosidase activity	Molecular Function	20	51	1	0.0513092	gene-LOC100818098;gene-LOC100804103;gene-LOC100811187;gene-LOC100781074;gene-LOC100787084;gene-LOC100818637;gene-LOC100780897;gene-LOC100804036;gene-LOC100815037;gene-LOC100792629;gene-LOC100785688;gene-LOC106795462;gene-LOC100818981;gene-LOC100795144;gene-LOC100796895;Glycine_max_newGene_1453;gene-LOC100820539;gene-LOC100810170;gene-LOC100777287;gene-LOC100783905
GO:0005504	fatty acid binding	Molecular Function	17	42	1	0.0517916	gene-LOC100305511;gene-LOC100527244;Glycine_max_newGene_7827;gene-ACX1_1;gene-LOC100810829;gene-LOC100305635;gene-LOC100527769;gene-LOC100527644;gene-LOC100526983;gene-LOC100527120;gene-LOC100305686;gene-LOC102660896;gene-GMCHI3B1;gene-LOC100305636;gene-GMCHI3B2;gene-LOC100306273;gene-LOC100810277
GO:0000149	SNARE binding	Molecular Function	29	79	1	0.0528618	gene-LOC100816145;gene-LOC100795077;gene-LOC100810956;gene-LOC100796579;gene-LOC100804155;gene-LOC100778493;gene-LOC100787129;gene-LOC100789318;gene-LOC100799406;gene-LOC100796741;gene-LOC100796477;gene-LOC100811494;gene-LOC100786429;gene-LOC100800991;gene-LOC100786529;gene-LOC100793612;gene-LOC100799493;gene-LOC100780958;gene-LOC100794161;gene-LOC100819710;Glycine_max_newGene_3186;gene-LOC100789…
GO:0097177	mitochondrial ribosome binding	Molecular Function	4	6	1	0.0543423	gene-LOC100799012;gene-LOC100790011;gene-LOC100803348;gene-LOC100797340
GO:0017057	6-phosphogluconolactonase activity	Molecular Function	4	6	1	0.0543423	gene-LOC100806593;gene-LOC100792737;gene-LOC100794078;gene-LOC100809411
GO:0051538	3 iron, 4 sulfur cluster binding	Molecular Function	4	6	1	0.0543423	gene-LOC100815931;gene-LOC100815377;Glycine_max_newGene_7186;gene-LOC100819513
GO:0008494	translation activator activity	Molecular Function	4	6	1	0.0543423	gene-LOC100797340;gene-LOC100803348;gene-LOC100799012;gene-LOC100790011
GO:0102148	N-acetyl-beta-D-galactosaminidase activity	Molecular Function	4	6	1	0.0543423	gene-LOC100776871;gene-LOC100814818;gene-LOC100790700;gene-LOC100785536
GO:0004375	glycine dehydrogenase (decarboxylating) activity	Molecular Function	4	6	1	0.0543423	gene-LOC100814366;gene-LOC100819714;gene-LOC100777528;gene-LOC100795673
GO:0004108	citrate (Si)-synthase activity	Molecular Function	4	6	1	0.0543423	gene-LOC100499624;gene-LOC100805556;gene-LOC100775180;gene-LOC100781418
GO:0004563	beta-N-acetylhexosaminidase activity	Molecular Function	4	6	1	0.0543423	gene-LOC100790700;gene-LOC100814818;gene-LOC100785536;gene-LOC100776871
GO:0008443	phosphofructokinase activity	Molecular Function	4	6	1	0.0543423	gene-LOC100782857;gene-LOC100804429;gene-LOC100797925;gene-LOC100800863
GO:0052833	inositol monophosphate 4-phosphatase activity	Molecular Function	4	6	1	0.0543423	gene-LOC100799849;gene-GMAPHO1:H14;gene-LOC100817591;gene-LOC100790820
GO:0004807	triose-phosphate isomerase activity	Molecular Function	4	6	1	0.0543423	gene-LOC100798459;gene-LOC100796274;gene-LOC100812398;gene-LOC547761
GO:0052832	inositol monophosphate 3-phosphatase activity	Molecular Function	4	6	1	0.0543423	gene-GMAPHO1:H14;gene-LOC100817591;gene-LOC100799849;gene-LOC100790820
GO:0052742	phosphatidylinositol kinase activity	Molecular Function	4	6	1	0.0543423	gene-LOC100811499;gene-LOC547983;gene-LOC100784942;gene-LOC100777069
GO:0016621	cinnamoyl-CoA reductase activity	Molecular Function	4	6	1	0.0543423	gene-LOC100790333;gene-LOC100806281;gene-LOC100799213;gene-LOC100789070
GO:0008934	inositol monophosphate 1-phosphatase activity	Molecular Function	4	6	1	0.0543423	gene-GMAPHO1:H14;gene-LOC100817591;gene-LOC100799849;gene-LOC100790820
GO:0008177	succinate dehydrogenase (ubiquinone) activity	Molecular Function	4	6	1	0.0543423	gene-LOC100803020;gene-LOC100815377;gene-LOC100818379;Glycine_max_newGene_7186
GO:0042132	fructose 1,6-bisphosphate 1-phosphatase activity	Molecular Function	6	11	1	0.055841	gene-LOC100788090;gene-LOC100799873;gene-LOC100815943;gene-LOC100793620;gene-FBP;gene-LOC100786122
GO:0004478	methionine adenosyltransferase activity	Molecular Function	6	11	1	0.055841	gene-LOC100787994;gene-LOC100812341;gene-LOC100794248;gene-LOC100820392;gene-LOC100799139;gene-LOC100777770
GO:0016851	magnesium chelatase activity	Molecular Function	6	11	1	0.055841	gene-CHLH;gene-LOC100775919;gene-LOC100815274;gene-CHLI;gene-LOC100806079;gene-LOC100787735
GO:0008460	dTDP-glucose 4,6-dehydratase activity	Molecular Function	6	11	1	0.055841	gene-LOC100775641;gene-LOC100785885;gene-LOC100789909;gene-LOC100819843;gene-LOC100803187;gene-LOC100806073
GO:0008506	sucrose:proton symporter activity	Molecular Function	6	11	1	0.055841	gene-LOC100803894;Glycine_max_newGene_8430;gene-LOC100786411;gene-SUT1;gene-LOC100782007;gene-LOC100784153
GO:0003978	UDP-glucose 4-epimerase activity	Molecular Function	6	11	1	0.055841	gene-LOC100775308;gene-LOC100805114;gene-LOC100783060;gene-LOC100803483;gene-LOC100781806;gene-LOC100792055
GO:0000030	mannosyltransferase activity	Molecular Function	6	11	1	0.055841	gene-LOC100804913;gene-LOC100787801;gene-LOC100786127;gene-LOC100781854;gene-LOC100805094;gene-LOC100805971
GO:0003993	acid phosphatase activity	Molecular Function	23	61	1	0.0594504	gene-LOC100817359;gene-PAP;gene-LOC100816294;gene-LOC100814531;gene-LOC100802126;gene-LOC100793835;gene-PAP36;gene-LOC100790228;gene-LOC100803398;gene-LOC100818610;gene-LOC100775672;gene-PAP02;gene-GMPAP25;gene-LOC100795218;gene-LOC100779640;gene-LOC100788370;gene-LOC547669;gene-GMPAP3;gene-LOC100785781;gene-LOC100776063;gene-LOC100783099;gene-LOC100815749;gene-PHYTASE
GO:0051787	misfolded protein binding	Molecular Function	12	28	1	0.0624569	gene-LOC100785303;gene-LOC100777767;gene-LOC100802618;gene-GMBIP2;gene-LOC547838;gene-LOC100803843;gene-LOC100812707;gene-LOC100791885;gene-GMBIP4;gene-LOC100783754;gene-LOC100811870;gene-LOC100787543
GO:0004315	3-oxoacyl-[acyl-carrier-protein] synthase activity	Molecular Function	7	14	1	0.0649391	gene-KASI;gene-LOC548028;gene-LOC100813007;gene-KASII-A;gene-LOC548033;gene-LOC100306478;gene-KASII-B
GO:0017137	Rab GTPase binding	Molecular Function	26	71	1	0.0659742	gene-LOC100791150;gene-LOC100809001;gene-LOC100810054;gene-LOC100809869;gene-LOC100782049;gene-LOC100818738;gene-LOC100810943;gene-LOC100810735;gene-LOC100793138;gene-LOC100805808;gene-LOC100784639;gene-LOC100793557;gene-LOC100780622;gene-LOC100806518;gene-LOC100811679;gene-LOC100807177;gene-LOC100813760;gene-LOC100817329;gene-LOC100777799;gene-LOC100802342;gene-LOC100820217;gene-LOC100785695;gen…
GO:0004333	fumarate hydratase activity	Molecular Function	3	4	1	0.0680106	gene-LOC100813552;gene-LOC100810850;gene-LOC100819617
GO:0000026	alpha-1,2-mannosyltransferase activity	Molecular Function	3	4	1	0.0680106	gene-LOC100805094;gene-LOC100805971;gene-LOC100804913
GO:0004376	glycolipid mannosyltransferase activity	Molecular Function	3	4	1	0.0680106	gene-LOC100786062;gene-LOC100787801;gene-LOC100804913
GO:0005462	UDP-N-acetylglucosamine transmembrane transporter activity	Molecular Function	3	4	1	0.0680106	Glycine_max_newGene_11041;gene-LOC100778544;gene-LOC100819763
GO:0004165	dodecenoyl-CoA delta-isomerase activity	Molecular Function	3	4	1	0.0680106	gene-LOC100797754;gene-LOC100786464;gene-LOC100813431
GO:0004300	enoyl-CoA hydratase activity	Molecular Function	3	4	1	0.0680106	gene-LOC100786464;gene-LOC100797754;gene-LOC100306241
GO:0005461	UDP-glucuronic acid transmembrane transporter activity	Molecular Function	3	4	1	0.0680106	gene-LOC100778544;Glycine_max_newGene_11041;gene-LOC100819763
GO:0004591	oxoglutarate dehydrogenase (succinyl-transferring) activity	Molecular Function	3	4	1	0.0680106	gene-LOC100786978;gene-LOC100816277;gene-LOC100781680
GO:0019781	NEDD8 activating enzyme activity	Molecular Function	3	4	1	0.0680106	gene-LOC100793799;gene-LOC100808837;gene-LOC100777973
GO:0140078	class I DNA-(apurinic or apyrimidinic site) lyase activity	Molecular Function	3	4	1	0.0680106	gene-LOC100817167;gene-LOC100776653;gene-LOC100818398
GO:0005463	UDP-N-acetylgalactosamine transmembrane transporter activity	Molecular Function	3	4	1	0.0680106	Glycine_max_newGene_11041;gene-LOC100778544;gene-LOC100819763
GO:0016289	CoA hydrolase activity	Molecular Function	3	4	1	0.0680106	gene-LOC100527631;gene-LOC100527403;gene-LOC100790693
GO:0016603	glutaminyl-peptide cyclotransferase activity	Molecular Function	3	4	1	0.0680106	gene-LOC100812294;gene-LOC100803206;gene-LOC100811755
GO:0008963	phospho-N-acetylmuramoyl-pentapeptide-transferase activity	Molecular Function	3	4	1	0.0680106	gene-LOC100811886;gene-LOC100789475;gene-LOC100801463
GO:0004055	argininosuccinate synthase activity	Molecular Function	3	4	1	0.0680106	gene-LOC100499845;gene-LOC100795886;gene-LOC100816038
GO:0051010	microtubule plus-end binding	Molecular Function	3	4	1	0.0680106	gene-LOC100808026;gene-LOC100805687;gene-LOC100802923
GO:0050178	phenylpyruvate tautomerase activity	Molecular Function	3	4	1	0.0680106	gene-LOC100805338;gene-LOC100500101;gene-LOC100306650
GO:0061522	1,4-dihydroxy-2-naphthoyl-CoA thioesterase activity	Molecular Function	3	4	1	0.0680106	gene-LOC100790693;gene-LOC100527403;gene-LOC100527631
GO:0000234	phosphoethanolamine N-methyltransferase activity	Molecular Function	3	4	1	0.0680106	gene-LOC100820554;gene-LOC100818466;gene-LOC100808891
GO:0003854	3-beta-hydroxy-delta5-steroid dehydrogenase activity	Molecular Function	8	17	1	0.0711176	gene-LOC100799363;gene-LOC100790333;gene-LOC100794808;gene-LOC100784676;gene-LOC100815785;gene-LOC100816854;gene-LOC100814147;gene-LOC100793329
GO:0004420	hydroxymethylglutaryl-CoA reductase (NADPH) activity	Molecular Function	5	9	1	0.0740691	gene-LOC100811237;gene-LOC100777317;gene-LOC100779932;gene-LOC100786956;gene-LOC100784330
GO:0004106	chorismate mutase activity	Molecular Function	5	9	1	0.0740691	gene-LOC100793028;gene-LOC100808361;gene-LOC100782140;gene-LOC100791341;gene-LOC100797299
GO:0004849	uridine kinase activity	Molecular Function	5	9	1	0.0740691	gene-LOC100798205;gene-LOC100786137;gene-LOC100527893;gene-LOC100777904;gene-LOC100780005
GO:0016790	thiolester hydrolase activity	Molecular Function	5	9	1	0.0740691	gene-LOC100806931;Glycine_max_newGene_2548;gene-FATB1B;gene-LOC100818013;gene-LOC100809770
GO:0032934	sterol binding	Molecular Function	9	20	1	0.0752616	gene-LOC100775781;gene-LOC100817856;gene-LOC100779808;gene-LOC100819924;gene-LOC100808070;gene-LOC100794335;gene-LOC100500058;gene-LOC100788779;gene-LOC100810228
GO:0016811	hydrolase activity, acting on carbon-nitrogen (but not peptide) bonds, in linear amides	Molecular Function	9	20	1	0.0752616	gene-LOC100812549;gene-LOC100814435;gene-LOC100794435;gene-LOC100781615;gene-LOC100780821;gene-LOC100785492;gene-LOC100792563;gene-LOC100787107;gene-LOC100802133
GO:0004471	malate dehydrogenase (decarboxylating) (NAD+) activity	Molecular Function	9	20	1	0.0752616	gene-LOC100799344;gene-LOC100784112;gene-LOC100811081;gene-LOC100818219;gene-LOC100806545;gene-LOC100796117;gene-LOC100795823;gene-LOC100775394;gene-LOC100791514
GO:0016208	AMP binding	Molecular Function	9	20	1	0.0752616	gene-LOC100306535;gene-LOC100790062;gene-LOC100808939;gene-LOC100789257;gene-LOC100527623;gene-LOC100778117;gene-LOC100500682;gene-LOC100804158;gene-LOC100305494
GO:0004722	protein serine/threonine phosphatase activity	Molecular Function	58	176	1	0.0757584	gene-LOC100810695;gene-LOC100810538;gene-LOC100775371;gene-LOC100785390;gene-LOC100799218;gene-LOC100776518;gene-LOC100811922;gene-LOC100816201;gene-LOC100789207;gene-LOC100790374;gene-LOC100781388;gene-LOC100806476;gene-LOC100807886;gene-LOC100500617;gene-LOC100779241;gene-LOC100807235;gene-LOC100790813;gene-LOC100820303;gene-LOC100795728;gene-LOC100807302;gene-LOC100790373;gene-LOC100786856;gen…
GO:0001758	retinal dehydrogenase activity	Molecular Function	2	2	1	0.0772789	gene-LOC100792798;gene-LOC100791918
GO:0003923	GPI-anchor transamidase activity	Molecular Function	2	2	1	0.0772789	gene-LOC100794836;gene-LOC100805764
GO:0004458	D-lactate dehydrogenase (cytochrome) activity	Molecular Function	2	2	1	0.0772789	gene-LOC100800479;gene-LOC100784932
GO:0048529	magnesium-protoporphyrin IX monomethyl ester (oxidative) cyclase activity	Molecular Function	2	2	1	0.0772789	gene-LOC100805393;gene-LOC100527925
GO:0016594	glycine binding	Molecular Function	2	2	1	0.0772789	gene-LOC100795673;gene-LOC100814366
GO:0015137	citrate transmembrane transporter activity	Molecular Function	2	2	1	0.0772789	gene-FRD3a;gene-FRD3b
GO:1901681	sulfur compound binding	Molecular Function	2	2	1	0.0772789	gene-LOC100807200;gene-LOC100775953
GO:0004647	phosphoserine phosphatase activity	Molecular Function	2	2	1	0.0772789	gene-LOC100789869;gene-LOC100814193
GO:0004452	isopentenyl-diphosphate delta-isomerase activity	Molecular Function	2	2	1	0.0772789	gene-LOC100783078;gene-LOC100789313
GO:0015505	uracil:cation symporter activity	Molecular Function	2	2	1	0.0772789	gene-LOC100802349;gene-LOC100794172
GO:1901567	fatty acid derivative binding	Molecular Function	2	2	1	0.0772789	gene-LOC100775953;gene-LOC100807200
GO:0052624	2-phytyl-1,4-naphthoquinone methyltransferase activity	Molecular Function	2	2	1	0.0772789	gene-LOC100789973;gene-LOC100789470
GO:1990841	promoter-specific chromatin binding	Molecular Function	2	2	1	0.0772789	gene-LOC100781563;gene-LOC100805953
GO:0004170	dUTP diphosphatase activity	Molecular Function	2	2	1	0.0772789	gene-LOC100794055;gene-LOC100782126
GO:0016855	racemase and epimerase activity, acting on amino acids and derivatives	Molecular Function	2	2	1	0.0772789	gene-LOC100793110;gene-LOC100776391
GO:0071566	UFM1 activating enzyme activity	Molecular Function	2	2	1	0.0772789	gene-LOC100819760;gene-LOC100816132
GO:0016430	tRNA (adenine-N6-)-methyltransferase activity	Molecular Function	2	2	1	0.0772789	gene-LOC100808885;gene-LOC100812211
GO:0016633	galactonolactone dehydrogenase activity	Molecular Function	2	2	1	0.0772789	gene-LOC100793515;gene-LOC100526948
GO:0004056	argininosuccinate lyase activity	Molecular Function	2	2	1	0.0772789	gene-LOC100796544;gene-LOC100780483
GO:0003992	N2-acetyl-L-ornithine:2-oxoglutarate 5-aminotransferase activity	Molecular Function	2	2	1	0.0772789	gene-LOC100798293;gene-LOC100797501
GO:0045437	uridine nucleosidase activity	Molecular Function	2	2	1	0.0772789	gene-LOC100818908;gene-LOC100787563
GO:0032422	purine-rich negative regulatory element binding	Molecular Function	2	2	1	0.0772789	gene-LOC100499955;gene-LOC100782805
GO:0004583	dolichyl-phosphate-glucose-glycolipid alpha-glucosyltransferase activity	Molecular Function	2	2	1	0.0772789	gene-LOC100792228;gene-LOC100792293
GO:0008974	phosphoribulokinase activity	Molecular Function	2	2	1	0.0772789	gene-LOC100807126;gene-LOC100777515
GO:0004585	ornithine carbamoyltransferase activity	Molecular Function	2	2	1	0.0772789	gene-LOC100775828;gene-LOC100796780
GO:0050269	coniferyl-aldehyde dehydrogenase activity	Molecular Function	2	2	1	0.0772789	gene-LOC100791918;gene-LOC100792798
GO:0072585	xanthosine nucleotidase activity	Molecular Function	2	2	1	0.0772789	gene-LOC100818908;gene-LOC100787563
GO:0010385	double-stranded methylated DNA binding	Molecular Function	2	2	1	0.0772789	gene-LOC100818448;gene-LOC100780160
GO:0046922	peptide-O-fucosyltransferase activity	Molecular Function	2	2	1	0.0772789	gene-LOC548046;gene-LOC100776069
GO:0008830	dTDP-4-dehydrorhamnose 3,5-epimerase activity	Molecular Function	2	2	1	0.0772789	gene-LOC100801553;gene-LOC100781643
GO:1990610	acetolactate synthase regulator activity	Molecular Function	2	2	1	0.0772789	gene-LOC100810297;gene-LOC100779210
GO:0008418	protein-N-terminal asparagine amidohydrolase activity	Molecular Function	2	2	1	0.0772789	gene-LOC100806375;gene-LOC100806607
GO:0016710	trans-cinnamate 4-monooxygenase activity	Molecular Function	2	2	1	0.0772789	gene-LOC100812188;gene-LOC100818985
GO:0000224	peptide-N4-(N-acetyl-beta-glucosaminyl)asparagine amidase activity	Molecular Function	2	2	1	0.0772789	gene-LOC100792131;gene-LOC100794435
GO:0046406	magnesium protoporphyrin IX methyltransferase activity	Molecular Function	2	2	1	0.0772789	gene-LOC100819913;gene-LOC100817017
GO:0052657	guanine phosphoribosyltransferase activity	Molecular Function	2	2	1	0.0772789	gene-LOC100037484;gene-LOC100797406
GO:0030732	methionine S-methyltransferase activity	Molecular Function	2	2	1	0.0772789	gene-LOC100800262;gene-LOC100803724
GO:0102960	momilactone-A synthase activity	Molecular Function	2	2	1	0.0772789	gene-LOC100794412;gene-LOC100777055
GO:0061632	RNA lariat debranching enzyme activator activity	Molecular Function	2	2	1	0.0772789	gene-LOC100782106;gene-LOC100809090
GO:0051744	3,8-divinyl protochlorophyllide a 8-vinyl reductase activity	Molecular Function	2	2	1	0.0772789	gene-LOC100780482;gene-LOC100813325
GO:0004163	diphosphomevalonate decarboxylase activity	Molecular Function	2	2	1	0.0772789	gene-LOC100800990;gene-LOC100785593
GO:0052751	GDP-mannose hydrolase activity	Molecular Function	2	2	1	0.0772789	Glycine_max_newGene_10168;gene-LOC100809516
GO:0043916	DNA-7-methylguanine glycosylase activity	Molecular Function	2	2	1	0.0772789	gene-LOC100788160;gene-LOC100790760
GO:0004156	dihydropteroate synthase activity	Molecular Function	2	2	1	0.0772789	gene-LOC100808899;Glycine_max_newGene_10420
GO:0016002	sulfite reductase activity	Molecular Function	2	2	1	0.0772789	gene-LOC100790764;gene-GMSIR
GO:0050080	malonyl-CoA decarboxylase activity	Molecular Function	2	2	1	0.0772789	gene-LOC100802836;gene-LOC100807487
GO:0004582	dolichyl-phosphate beta-D-mannosyltransferase activity	Molecular Function	2	2	1	0.0772789	gene-LOC100500321;gene-LOC100802117
GO:0004142	diacylglycerol cholinephosphotransferase activity	Molecular Function	2	2	1	0.0772789	gene-LOC100775686;gene-LOC100790665
GO:0008792	arginine decarboxylase activity	Molecular Function	2	2	1	0.0772789	gene-LOC100793552;gene-ADC
GO:0004496	mevalonate kinase activity	Molecular Function	2	2	1	0.0772789	gene-LOC100820343;gene-LOC100810739
GO:0003987	acetate-CoA ligase activity	Molecular Function	2	2	1	0.0772789	gene-LOC100808939;gene-LOC100789257
GO:0047793	cycloeucalenol cycloisomerase activity	Molecular Function	2	2	1	0.0772789	gene-LOC100780309;gene-LOC100777966
GO:0034722	gamma-glutamyl-peptidase activity	Molecular Function	2	2	1	0.0772789	gene-LOC100796947;gene-GH
GO:0004377	GDP-Man:Man3GlcNAc2-PP-Dol alpha-1,2-mannosyltransferase activity	Molecular Function	2	2	1	0.0772789	gene-LOC100801617;gene-LOC100808662
GO:0008893	guanosine-3',5'-bis(diphosphate) 3'-diphosphatase activity	Molecular Function	2	2	1	0.0772789	gene-LOC100499956;gene-LOC100814519
GO:0016426	tRNA (adenine) methyltransferase activity	Molecular Function	2	2	1	0.0772789	gene-LOC100808885;gene-LOC100812211
GO:0008495	protoheme IX farnesyltransferase activity	Molecular Function	2	2	1	0.0772789	gene-LOC100806314;gene-LOC100819077
GO:0030414	peptidase inhibitor activity	Molecular Function	2	2	1	0.0772789	gene-LOC100775597;gene-LOC100802145
GO:0004655	porphobilinogen synthase activity	Molecular Function	2	2	1	0.0772789	gene-HEMB;Glycine_max_newGene_818
GO:0000225	N-acetylglucosaminylphosphatidylinositol deacetylase activity	Molecular Function	2	2	1	0.0772789	gene-LOC100802133;gene-LOC100527883
GO:0004489	methylenetetrahydrofolate reductase (NAD(P)H) activity	Molecular Function	2	2	1	0.0772789	gene-LOC100782073;gene-LOC100797489
GO:0019237	centromeric DNA binding	Molecular Function	2	2	1	0.0772789	gene-LOC100778037;gene-LOC547764
GO:0050201	fucokinase activity	Molecular Function	2	2	1	0.0772789	gene-LOC100776147;gene-LOC100803620
GO:0003879	ATP phosphoribosyltransferase activity	Molecular Function	2	2	1	0.0772789	gene-LOC100817490;gene-LOC100792493
GO:0047622	adenosine nucleosidase activity	Molecular Function	2	2	1	0.0772789	gene-LOC100818908;gene-LOC100787563
GO:0045158	electron transporter, transferring electrons within cytochrome b6/f complex of photosystem II activity	Molecular Function	2	2	1	0.0772789	gene-LOC100799420;gene-PETC
GO:0004422	hypoxanthine phosphoribosyltransferase activity	Molecular Function	2	2	1	0.0772789	gene-LOC100797406;gene-LOC100037484
GO:0042284	sphingolipid delta-4 desaturase activity	Molecular Function	2	2	1	0.0772789	gene-DES1.1;gene-DES1.2
GO:0004632	phosphopantothenate--cysteine ligase activity	Molecular Function	2	2	1	0.0772789	gene-LOC100808811;gene-LOC100777777
GO:0050311	sulfite reductase (ferredoxin) activity	Molecular Function	2	2	1	0.0772789	gene-LOC100790764;gene-GMSIR
GO:0000064	L-ornithine transmembrane transporter activity	Molecular Function	2	2	1	0.0772789	gene-LOC100787332;gene-LOC100787304
GO:0015379	potassium:chloride symporter activity	Molecular Function	2	2	1	0.0772789	gene-LOC100780371;gene-LOC100795205
GO:0030272	5-formyltetrahydrofolate cyclo-ligase activity	Molecular Function	2	2	1	0.0772789	gene-LOC100527426;gene-LOC100777775
GO:0030158	protein xylosyltransferase activity	Molecular Function	2	2	1	0.0772789	gene-LOC100787649;gene-LOC100785157
GO:0008690	3-deoxy-manno-octulosonate cytidylyltransferase activity	Molecular Function	2	2	1	0.0772789	gene-LOC100818593;gene-LOC100800647
GO:0016300	tRNA (uracil) methyltransferase activity	Molecular Function	2	2	1	0.0772789	gene-LOC100807751;gene-LOC100784028
GO:0032131	alkylated DNA binding	Molecular Function	2	2	1	0.0772789	gene-LOC100790760;gene-LOC100788160
GO:0003975	UDP-N-acetylglucosamine-dolichyl-phosphate N-acetylglucosaminephosphotransferase activity	Molecular Function	2	2	1	0.0772789	gene-LOC100789475;gene-LOC100801463
GO:0004663	Rab geranylgeranyltransferase activity	Molecular Function	2	2	1	0.0772789	gene-LOC100777273;gene-LOC100793642
GO:0050263	ribosylpyrimidine nucleosidase activity	Molecular Function	2	2	1	0.0772789	gene-LOC100818908;gene-LOC100787563
GO:0003866	3-phosphoshikimate 1-carboxyvinyltransferase activity	Molecular Function	2	2	1	0.0772789	gene-LOC100811089;gene-LOC100789268
GO:0003858	3-hydroxybutyrate dehydrogenase activity	Molecular Function	2	2	1	0.0772789	gene-LOC100817216;gene-LOC100802847
GO:0008179	adenylate cyclase binding	Molecular Function	2	2	1	0.0772789	gene-LOC100780824;gene-LOC100793194
GO:0008465	glycerate dehydrogenase activity	Molecular Function	2	2	1	0.0772789	gene-LOC547640;gene-P42-1
GO:0003881	CDP-diacylglycerol-inositol 3-phosphatidyltransferase activity	Molecular Function	2	2	1	0.0772789	gene-LOC100798168;gene-LOC100797963
GO:0004795	threonine synthase activity	Molecular Function	2	2	1	0.0772789	gene-LOC100805303;gene-LOC100813292
GO:0008446	GDP-mannose 4,6-dehydratase activity	Molecular Function	2	2	1	0.0772789	gene-LOC100777692;gene-LOC100797782
GO:0034432	bis(5'-adenosyl)-pentaphosphatase activity	Molecular Function	2	2	1	0.0772789	gene-LOC100499956;gene-LOC100814519
GO:0004794	L-threonine ammonia-lyase activity	Molecular Function	2	2	1	0.0772789	gene-LOC100777200;gene-LOC100802802
GO:0080116	glucuronoxylan glucuronosyltransferase activity	Molecular Function	2	2	1	0.0772789	gene-LOC100797122;gene-LOC100800085
GO:0036310	annealing helicase activity	Molecular Function	2	2	1	0.0772789	gene-LOC100778246;gene-LOC100797654
GO:0008831	dTDP-4-dehydrorhamnose reductase activity	Molecular Function	2	2	1	0.0772789	gene-LOC100801553;gene-LOC100781643
GO:0005274	allantoin uptake transmembrane transporter activity	Molecular Function	2	2	1	0.0772789	gene-LOC100802349;gene-LOC100794172
GO:0016429	tRNA (adenine-N1-)-methyltransferase activity	Molecular Function	2	2	1	0.0772789	gene-LOC102665775;gene-LOC100793069
GO:0050577	GDP-L-fucose synthase activity	Molecular Function	2	2	1	0.0772789	gene-LOC100776301;gene-LOC100793356
GO:0047661	amino-acid racemase activity	Molecular Function	2	2	1	0.0772789	gene-LOC100306705;gene-LOC100819732
GO:0017113	dihydropyrimidine dehydrogenase (NADP+) activity	Molecular Function	2	2	1	0.0772789	gene-LOC100804632;gene-LOC100818990
GO:0016651	oxidoreductase activity, acting on NAD(P)H	Molecular Function	11	26	1	0.0795977	gene-LOC100527081;gene-LOC100527038;gene-LOC100305959;gene-LOC100814030;gene-IFR2;gene-LOC100306371;gene-LOC100499858;gene-LOC100813627;gene-LOC100499826;gene-LOC100784029;gene-LOC100306645
GO:0030170	pyridoxal phosphate binding	Molecular Function	71	220	1	0.0806784	gene-LOC100804065;gene-LOC100801361;gene-LOC100800539;gene-LOC100785163;gene-LOC100793309;gene-LOC100783490;gene-LOC100814366;gene-LOC100807796;gene-LOC100813292;gene-GSA1;gene-LOC100794892;gene-LOC100807501;gene-LOC100815568;gene-LOC100795286;gene-LOC100527295;gene-LOC100815417;gene-LOC100776219;gene-LOC100775420;gene-LOC100779355;gene-LOC100787587;gene-LOC100784392;gene-LOC100803724;gene-ACS;ge…
GO:0005096	GTPase activator activity	Molecular Function	42	124	1	0.0809454	gene-LOC100815114;gene-LOC100813940;gene-LOC100820132;gene-LOC100819637;gene-LOC100810877;gene-LOC100781002;gene-LOC100817495;gene-LOC100806519;gene-LOC100800515;gene-LOC100499880;gene-LOC100782049;gene-LOC100791527;gene-LOC100815076;gene-LOC100809869;gene-LOC100817923;gene-LOC100809001;gene-LOC100786727;gene-LOC100789134;gene-LOC100791150;gene-LOC100792992;gene-LOC100779624;gene-LOC100792658;gen…
GO:0008171	O-methyltransferase activity	Molecular Function	23	63	1	0.0827181	gene-LOC100812768;gene-LOC100803633;gene-LOC100802593;gene-LOC100777636;gene-GMHEN1A;gene-LOC100800801;gene-LOC100798347;gene-LOC100789402;gene-LOC100799303;gene-LOC100818947;gene-GMHEN1B;gene-LOC100781008;gene-LOC100808660;gene-GMIMT1;gene-LOC100811247;gene-LOC100808134;gene-LOC100779260;gene-LOC100780100;Glycine_max_newGene_5716;gene-LOC100806525;gene-LOC100819853;gene-OMT5;gene-LOC100784957
GO:0048029	monosaccharide binding	Molecular Function	6	12	1	0.0860425	gene-LOC100818441;gene-LOC100809452;gene-LOC100305501;gene-LOC100807719;gene-LOC100499700;gene-LOC100798134
GO:0048256	flap endonuclease activity	Molecular Function	6	12	1	0.0860425	gene-LOC100791251;gene-LOC100808044;gene-LOC100792878;gene-LOC100798062;gene-LOC100801178;gene-LOC100779848
GO:0015098	molybdate ion transmembrane transporter activity	Molecular Function	6	12	1	0.0860425	gene-LOC100779658;gene-LOC100787263;gene-LOC100776620;gene-LOC100805871;gene-LOC100800785;gene-LOC100799378
GO:0004356	glutamate-ammonia ligase activity	Molecular Function	6	12	1	0.0860425	gene-GS1beta2;gene-LOC100780873;gene-GS-2;gene-GS;gene-GS1GAMMA2;gene-GS1-GAMMA
GO:0004675	transmembrane receptor protein serine/threonine kinase activity	Molecular Function	81	255	1	0.0899631	gene-LOC100815554;gene-LOC100775565;gene-LOC100781464;gene-LOC100814476;gene-LOC100811821;gene-LOC100800724;gene-LOC100816296;gene-LOC100784243;gene-LOC100783655;gene-LOC100788350;gene-LOC100796595;gene-LOC100305384;gene-LOC100777910;gene-LOC100778269;Glycine_max_newGene_4;gene-LOC100811580;gene-LOC100817460;gene-LOC100819995;gene-LOC100305404;gene-LOC100789884;gene-LOC100779420;gene-LOC100819674…
GO:0003989	acetyl-CoA carboxylase activity	Molecular Function	7	15	1	0.0933872	gene-LOC100778658;gene-ACCA-2;gene-ACCC-3;gene-ACCB-2;gene-LOC100803679;gene-ACCA-3;gene-ACCB-1
GO:0050567	glutaminyl-tRNA synthase (glutamine-hydrolyzing) activity	Molecular Function	7	15	1	0.0933872	gene-LOC100800479;gene-LOC100778732;gene-LOC100794638;gene-LOC100787123;gene-LOC100813162;gene-LOC100784932;gene-LOC100776622
GO:0030060	L-malate dehydrogenase activity	Molecular Function	7	15	1	0.0933872	gene-MDH-1;gene-LOC547963;gene-LOC100811402;gene-LOC100777296;gene-LOC100799793;gene-LOC100782567;gene-LOC100783173
GO:0010997	anaphase-promoting complex binding	Molecular Function	7	15	1	0.0933872	gene-LOC100780928;gene-LOC100800467;gene-LOC100795957;gene-LOC100784841;gene-LOC100808928;gene-LOC100785726;gene-CCS52
GO:0051539	4 iron, 4 sulfur cluster binding	Molecular Function	39	116	1	0.0986979	gene-LOC100817299;gene-LOC100526856;gene-LOC100777375;gene-LOC100798779;gene-LOC100789870;gene-LOC100817379;gene-LOC100818485;gene-LOC100813033;gene-LOC100808745;gene-LOC732577;gene-LOC100777389;gene-LOC102659722;gene-LOC100790764;gene-LOC100798865;gene-GMSIR;gene-LOC100810088;gene-LOC100793447;gene-LOC100802267;gene-LOC100306316;gene-LOC100799482;gene-LOC100807119;gene-LOC100799544;gene-LOC10081…
GO:0034513	box H/ACA snoRNA binding	Molecular Function	4	7	1	0.099296	gene-LOC100500467;gene-LOC100499993;gene-LOC100810689;gene-LOC100306376
GO:0004748	ribonucleoside-diphosphate reductase activity, thioredoxin disulfide as acceptor	Molecular Function	4	7	1	0.099296	gene-LOC100527867;gene-LOC548020;gene-LOC547948;gene-LOC100790224
GO:0004416	hydroxyacylglutathione hydrolase activity	Molecular Function	4	7	1	0.099296	gene-GMGLYII-4;gene-GMGLYII-8;gene-GMGLYII-5;gene-GMGLYII-9
GO:0008113	peptide-methionine (S)-S-oxide reductase activity	Molecular Function	4	7	1	0.099296	gene-LOC100792638;gene-LOC100782739;gene-LOC100802671;gene-LOC100527085
GO:0008447	L-ascorbate oxidase activity	Molecular Function	4	7	1	0.099296	gene-LOC100809971;gene-LOC100788318;gene-LOC100775521;gene-LOC100810923
GO:0004819	glutamine-tRNA ligase activity	Molecular Function	4	7	1	0.099296	gene-LOC100809656;gene-LOC100812875;gene-LOC100776379;gene-LOC100791298
GO:0009882	blue light photoreceptor activity	Molecular Function	4	7	1	0.099296	gene-LOC100815428;gene-GMCRY2B;gene-LOC100786551;gene-CRY1a
GO:0015930	glutamate synthase activity	Molecular Function	4	7	1	0.099296	gene-LOC100815931;gene-LOC100809299;gene-LOC548016;gene-LOC100819513
GO:0102500	beta-maltose 4-alpha-glucanotransferase activity	Molecular Function	4	7	1	0.099296	gene-LOC100785271;gene-LOC100781780;gene-LOC100789996;gene-LOC100795007
GO:0005460	UDP-glucose transmembrane transporter activity	Molecular Function	4	7	1	0.099296	gene-LOC100812669;gene-LOC100786532;gene-LOC100811913;gene-LOC100817042
GO:0004834	tryptophan synthase activity	Molecular Function	4	7	1	0.099296	gene-TSA;gene-LOC100808400;gene-LOC100801288;gene-LOC100802258
GO:0004869	cysteine-type endopeptidase inhibitor activity	Molecular Function	9	21	1	0.100322	gene-LOC100809340;gene-LOC100810979;gene-LOC100801232;gene-N2;gene-LOC100816527;gene-LOC100797842;gene-R1;gene-L1;gene-LOC100306670
GO:0003843	1,3-beta-D-glucan synthase activity	Molecular Function	12	30	1	0.101404	gene-LOC100808120;gene-LOC100801607;gene-LOC100778380;gene-LOC106799011;gene-LOC100787540;gene-LOC100777209;gene-LOC100786527;gene-LOC100780527;gene-LOC100811121;gene-LOC100784105;gene-LOC100809371;gene-LOC100811473
GO:0004725	protein tyrosine phosphatase activity	Molecular Function	18	49	1	0.109781	gene-LOC100797254;gene-LOC102661225;gene-LOC100791465;gene-LOC100305790;gene-LOC100527219;gene-PTP1;gene-LOC100801622;gene-LOC100788460;gene-PRP1;gene-LOC100787713;gene-LOC100817410;gene-LOC100799968;gene-LOC100807702;gene-LOC100806263;gene-LOC100786889;gene-LOC100811048;gene-LOC100799214;gene-LOC100803597
GO:0008094	DNA-dependent ATPase activity	Molecular Function	18	49	1	0.109781	gene-LOC100780427;gene-LOC100793092;gene-LOC100805894;gene-LOC100777423;gene-LOC100797567;gene-LOC100777687;gene-LOC100817842;gene-LOC100811104;gene-LOC100797654;gene-LOC100814442;gene-LOC100811608;gene-LOC100781271;gene-LOC100791510;gene-LOC100794165;gene-LOC100527406;gene-LOC100820025;gene-LOC100798983;gene-LOC100820307
GO:0016887	ATPase activity	Molecular Function	153	505	1	0.113301	gene-LOC100818615;gene-LOC100794788;Glycine_max_newGene_8042;gene-LOC100814667;gene-LOC100809643;gene-LOC100817829;gene-LOC100799365;gene-LOC547525;gene-LOC100780618;gene-LOC100816693;gene-LOC100780167;gene-LOC100806865;gene-LOC100782386;gene-LOC100775206;gene-LOC100803849;gene-LOC100814373;gene-LOC100816905;gene-LOC100779955;gene-LOC100784221;gene-LOC100816135;gene-LOC100800014;gene-LOC100784725…
GO:0004664	prephenate dehydratase activity	Molecular Function	5	10	1	0.115111	gene-LOC100781285;gene-LOC100797636;gene-LOC100787387;gene-LOC100800074;gene-LOC100809331
GO:0051996	squalene synthase activity	Molecular Function	5	10	1	0.115111	gene-LOC100775983;gene-LOC100811518;Glycine_max_newGene_6295;gene-LOC100780932;gene-LOC547940
GO:0004028	3-chloroallyl aldehyde dehydrogenase activity	Molecular Function	5	10	1	0.115111	gene-LOC100800699;gene-LOC100808513;gene-LOC100819197;gene-LOC100798020;gene-LOC100817701
GO:0004310	farnesyl-diphosphate farnesyltransferase activity	Molecular Function	5	10	1	0.115111	gene-LOC100780932;gene-LOC547940;Glycine_max_newGene_6295;gene-LOC100811518;gene-LOC100775983
GO:0003713	transcription coactivator activity	Molecular Function	14	37	1	0.120553	gene-LOC100500039;gene-LOC100810209;gene-LOC100794041;gene-LOC100305633;gene-LOC100811887;gene-LOC100787707;gene-LOC100815514;gene-LOC100801134;gene-LOC100499671;gene-LOC100805953;gene-LOC100781563;gene-LOC100305481;gene-LOC100812917;gene-LOC100527713
GO:0004784	superoxide dismutase activity	Molecular Function	6	13	1	0.123428	gene-LOC100101896;gene-LOC100305732;gene-SODB2;gene-LOC100784752;gene-SOD1;gene-LOC100785490
GO:0031683	G-protein beta/gamma-subunit complex binding	Molecular Function	7	16	1	0.127624	gene-LOC100820512;gene-GPA2;gene-LOC100781223;gene-LOC100794534;gene-LOC100794860;gene-GPA1;gene-LOC100803926
GO:0015248	sterol transporter activity	Molecular Function	7	16	1	0.127624	gene-LOC100779808;gene-LOC100817856;gene-LOC100819924;gene-LOC100808070;gene-LOC100794335;gene-LOC100810228;gene-LOC100788779
GO:0000146	microfilament motor activity	Molecular Function	10	25	1	0.128733	gene-LOC100819436;gene-LOC100802074;gene-LOC100786418;gene-LOC100801124;gene-LOC100804820;gene-LOC100791070;gene-LOC100786893;gene-LOC100802614;gene-LOC100782618;gene-LOC100781736
GO:0030898	actin-dependent ATPase activity	Molecular Function	10	25	1	0.128733	gene-LOC100804820;gene-LOC100791070;gene-LOC100786893;gene-LOC100801124;gene-LOC100802614;gene-LOC100782618;gene-LOC100781736;gene-LOC100802074;gene-LOC100819436;gene-LOC100786418
GO:0015297	antiporter activity	Molecular Function	54	169	1	0.131515	gene-LOC100813464;gene-LOC100777237;gene-LOC100789611;gene-LOC100817098;gene-LOC100816863;Glycine_max_newGene_11041;gene-LOC100816310;gene-LOC100814869;gene-LOC100789080;gene-LOC100782555;gene-LOC100819763;gene-LOC100786532;gene-LOC100794336;gene-LOC100790274;gene-LOC100799112;gene-FRD3b;gene-LOC100809504;gene-LOC100777499;gene-LOC100778544;gene-LOC100500204;gene-LOC100815504;gene-LOC100792588;ge…
GO:0017069	snRNA binding	Molecular Function	3	5	1	0.135206	gene-LOC100814109;gene-LOC100806980;gene-LOC100807978
GO:0046523	S-methyl-5-thioribose-1-phosphate isomerase activity	Molecular Function	3	5	1	0.135206	gene-LOC100778545;gene-LOC100801044;gene-LOC100799311
GO:0042937	tripeptide transporter activity	Molecular Function	3	5	1	0.135206	gene-LOC100800628;gene-NRT1-3;gene-LOC100813385
GO:0004708	MAP kinase kinase activity	Molecular Function	3	5	1	0.135206	gene-LOC100789734;gene-LOC100789241;gene-LOC100820176
GO:0016984	ribulose-bisphosphate carboxylase activity	Molecular Function	3	5	1	0.135206	gene-LOC100794277;gene-LOC547605;gene-RBCS-1
GO:0019239	deaminase activity	Molecular Function	3	5	1	0.135206	gene-LOC100803676;gene-LOC100500302;gene-LOC100792467
GO:0004061	arylformamidase activity	Molecular Function	3	5	1	0.135206	gene-LOC100800277;Glycine_max_newGene_3836;gene-LOC100816766
GO:0004797	thymidine kinase activity	Molecular Function	3	5	1	0.135206	gene-LOC100813201;gene-LOC100781341;gene-LOC100818437
GO:0015184	L-cystine transmembrane transporter activity	Molecular Function	3	5	1	0.135206	gene-LOC100794945;gene-LOC100795576;gene-LOC100795040
GO:0051011	microtubule minus-end binding	Molecular Function	3	5	1	0.135206	gene-LOC100778458;gene-LOC100787842;gene-LOC100809294
GO:0030332	cyclin binding	Molecular Function	3	5	1	0.135206	gene-LOC100780359;gene-LOC100791241;gene-LOC100782865
GO:0004324	ferredoxin-NADP+ reductase activity	Molecular Function	3	5	1	0.135206	gene-LOC100798467;gene-LOC100793840;gene-LOC100802032
GO:0048487	beta-tubulin binding	Molecular Function	3	5	1	0.135206	gene-LOC100500215;gene-LOC100527822;gene-LOC100792992
GO:0043130	ubiquitin binding	Molecular Function	21	60	1	0.135999	gene-LOC100795465;gene-LOC100817821;gene-LOC100819240;gene-LOC100811623;gene-LOC100808389;gene-LOC100778187;gene-LOC100820141;gene-LOC100789588;gene-LOC100783253;gene-LOC100792095;gene-LOC100527204;gene-LOC100778129;gene-LOC100805404;gene-LOC100804038;gene-LOC100792334;gene-LOC100814983;gene-LOC100780721;gene-LOC100803170;gene-LOC100803005;gene-LOC100819019;gene-LOC100816481
GO:0003697	single-stranded DNA binding	Molecular Function	41	126	1	0.138297	gene-LOC100779483;gene-LOC100802903;gene-LOC100811545;gene-LOC100791302;gene-LOC100799441;gene-LOC100779625;gene-LOC100811968;gene-LOC100777423;gene-LOC100800649;gene-LOC100776255;gene-LOC100793746;gene-LOC100780574;gene-LOC100813006;gene-LOC100797086;gene-LOC100809336;gene-LOC100811639;gene-LOC100788700;gene-LOC100808364;gene-LOC100820307;gene-LOC100783752;gene-LOC100806739;gene-LOC100781330;gen…
GO:0003682	chromatin binding	Molecular Function	43	133	1	0.142293	gene-LOC100814493;gene-LOC100787968;gene-LOC100807825;gene-LOC100818307;gene-LOC100794765;gene-LOC100800993;gene-LOC100819549;gene-LOC100797667;gene-LOC100817639;gene-LOC100305828;gene-LOC100816046;gene-LOC100809531;gene-LOC100818807;gene-LOC100811887;gene-LOC100799480;gene-LOC100781925;gene-LOC100803692;gene-LOC100527768;gene-LOC100780579;gene-LOC100798061;gene-LOC100817519;gene-LOC100526926;Gly…
GO:0030276	clathrin binding	Molecular Function	14	38	1	0.144169	gene-LOC100811093;gene-LOC100814144;gene-LOC100804267;gene-LOC100805865;gene-LOC100784577;gene-LOC100795978;gene-LOC100801153;gene-LOC100809730;gene-LOC100777111;gene-LOC100792918;gene-LOC100800909;gene-LOC100813981;gene-LOC100779375;gene-LOC100820002
GO:0008236	serine-type peptidase activity	Molecular Function	12	32	1	0.152013	gene-LOC100806381;gene-LOC100499932;gene-LOC100806486;gene-LOC100784480;gene-LOC100803257;gene-LOC100818627;gene-LOC100804192;gene-LOC100794040;gene-LOC100781698;gene-LOC100792376;gene-LOC100802457;gene-LOC100804985
GO:0004665	prephenate dehydrogenase (NADP+) activity	Molecular Function	4	8	1	0.1561	gene-PDH2;gene-PDH1;gene-ADH1;gene-TYRA-A
GO:0017091	AU-rich element binding	Molecular Function	4	8	1	0.1561	gene-LOC100776087;gene-LOC100806953;gene-LOC100793768;gene-LOC100801931
GO:1990381	ubiquitin-specific protease binding	Molecular Function	4	8	1	0.1561	gene-LOC100785303;gene-LOC100783754;gene-LOC100791885;gene-LOC100802618
GO:0008977	prephenate dehydrogenase (NAD+) activity	Molecular Function	4	8	1	0.1561	gene-PDH2;gene-PDH1;gene-ADH1;gene-TYRA-A
GO:0008574	ATP-dependent microtubule motor activity, plus-end-directed	Molecular Function	10	26	1	0.159443	gene-LOC100796881;gene-LOC100782128;gene-LOC100784725;gene-LOC100794302;gene-LOC100800246;gene-LOC100817066;gene-LOC100816693;gene-LOC100818630;gene-LOC100798358;gene-LOC100784714
GO:0033612	receptor serine/threonine kinase binding	Molecular Function	10	26	1	0.159443	gene-LOC100780150;gene-LOC100818900;gene-LOC100808483;gene-LOC100789083;gene-LOC100802727;gene-LOC100796864;gene-LOC100804875;gene-LOC100788575;gene-LOC100807370;gene-LOC100794002
GO:0008198	ferrous iron binding	Molecular Function	9	23	1	0.162723	gene-LOC100526856;gene-PAP;gene-LOC547698;gene-LOC100810000;gene-LOC100818610;gene-LOC100810694;gene-LOC100798236;gene-LOC100816294;gene-LOC100811801
GO:0004861	cyclin-dependent protein serine/threonine kinase inhibitor activity	Molecular Function	5	11	1	0.164502	gene-LOC547744;gene-LOC548057;gene-LOC100306496;gene-LOC100817219;gene-LOC547962
GO:0004594	pantothenate kinase activity	Molecular Function	5	11	1	0.164502	gene-LOC100804454;gene-LOC100815745;gene-LOC100808162;gene-LOC100783082;gene-LOC100782208
GO:0004715	non-membrane spanning protein tyrosine kinase activity	Molecular Function	5	11	1	0.164502	gene-LOC100792253;gene-LOC100813950;gene-LOC100800529;gene-LOC100779497;gene-LOC106795346
GO:0003860	3-hydroxyisobutyryl-CoA hydrolase activity	Molecular Function	5	11	1	0.164502	gene-LOC100811550;gene-LOC100815230;gene-LOC100813160;gene-LOC100801676;gene-LOC100818188
GO:0016762	xyloglucan:xyloglucosyl transferase activity	Molecular Function	23	68	1	0.164567	gene-LOC100778185;gene-LOC100778482;gene-LOC100791974;gene-LOC100786236;gene-LOC100796768;gene-LOC100499905;gene-LOC100784660;gene-LOC100785982;gene-XTH1;gene-LOC100790136;gene-LOC100778237;gene-LOC100793766;gene-LOC100813742;gene-LOC100811671;gene-LOC102664743;gene-LOC100781528;gene-LOC100786906;gene-LOC100527891;gene-LOC547802;gene-LOC100801567;gene-LOC100817874;gene-LOC100800720;gene-LOC100796…
GO:0019887	protein kinase regulator activity	Molecular Function	7	17	1	0.167178	gene-LOC100778117;gene-LOC100789856;gene-LOC100784315;gene-LOC100818156;gene-LOC100790062;gene-LOC100778254;gene-LOC100811808
GO:0005049	nuclear export signal receptor activity	Molecular Function	6	14	1	0.167294	gene-LOC100782006;gene-LOC100806017;gene-LOC100786647;gene-LOC100802384;gene-LOC100801426;gene-LOC100787912
GO:0016702	oxidoreductase activity, acting on single donors with incorporation of molecular oxygen, incorporation of two atoms of oxygen	Molecular Function	24	72	1	0.178578	gene-LOC100814410;gene-LOX9;gene-LOC100789019;gene-LOX7;gene-LOC100786646;gene-LOC100781307;gene-VLXB;gene-LOC100787202;gene-LOC100793614;gene-LOC100802459;Glycine_max_newGene_6159;gene-LOC547835;gene-LOC100806214;gene-LOC100784778;gene-LOC100815550;Glycine_max_newGene_4898;gene-VLXC;gene-LOC100803358;gene-LOC100802887;gene-LOC100782558;gene-LOC100809541;gene-LOC100800451;gene-LOC100780162;gene-L…
GO:0019899	enzyme binding	Molecular Function	32	99	1	0.184812	gene-LOC100814445;gene-LOC100804956;gene-LOC100809598;gene-LOC100306398;gene-LOC100778205;gene-LOC100306559;gene-LOC100804982;gene-LOC100793557;gene-LOC100814664;gene-LOC100803180;gene-LOC100527864;gene-HIR1;gene-LOC100790186;gene-LOC547868;gene-LOC100778680;gene-LOC100777561;gene-LOC100805974;gene-LOC100818162;gene-LOC100813260;gene-LOC100789295;gene-LOC100777871;gene-LOC100812552;gene-LOC100775…
GO:0005543	phospholipid binding	Molecular Function	23	69	1	0.184933	gene-LOC100798958;gene-LOC100817169;gene-LOC100805865;gene-LOC100796250;gene-LOC100783752;gene-LOC100811093;gene-LOC100779624;gene-LOC100803851;gene-LOC100813981;gene-LOC100793455;gene-LOC100499880;gene-LOC100794899;gene-LOC100777506;gene-LOC100799499;gene-LOC100799279;gene-LOC100788395;gene-LOC100778290;gene-LOC100805161;gene-LOC100804887;gene-LOC100306214;gene-LOC100776009;Glycine_max_newGene_9…
GO:0003774	motor activity	Molecular Function	11	30	1	0.18733	gene-LOC100305536;gene-LOC100777142;gene-LOC100812525;gene-LOC100305908;gene-LOC100818959;gene-LOC100810423;gene-LOC100808023;gene-LOC100500277;gene-LOC100796845;gene-LOC100527842;gene-LOC100805980
GO:0004151	dihydroorotase activity	Molecular Function	2	3	1	0.188876	gene-LOC100804389;gene-LOC100815210
GO:0052866	phosphatidylinositol phosphate phosphatase activity	Molecular Function	2	3	1	0.188876	gene-LOC100796999;gene-LOC100780963
GO:0004073	aspartate-semialdehyde dehydrogenase activity	Molecular Function	2	3	1	0.188876	gene-LOC100814757;gene-LOC100793061
GO:0015616	DNA translocase activity	Molecular Function	2	3	1	0.188876	gene-LOC100779283;gene-LOC100781631
GO:0003980	UDP-glucose:glycoprotein glucosyltransferase activity	Molecular Function	2	3	1	0.188876	gene-LOC100797897;gene-LOC100811899
GO:0008887	glycerate kinase activity	Molecular Function	2	3	1	0.188876	gene-LOC100806896;gene-LOC100820573
GO:0050126	N-carbamoylputrescine amidase activity	Molecular Function	2	3	1	0.188876	gene-LOC100785492;gene-LOC100812549
GO:0061863	microtubule plus end polymerase	Molecular Function	2	3	1	0.188876	gene-LOC100778670;gene-LOC100795622
GO:0000009	alpha-1,6-mannosyltransferase activity	Molecular Function	2	3	1	0.188876	gene-LOC100787801;gene-LOC100786127
GO:0045550	geranylgeranyl reductase activity	Molecular Function	2	3	1	0.188876	gene-LOC100779933;gene-LOC100814603
GO:0046537	2,3-bisphosphoglycerate-independent phosphoglycerate mutase activity	Molecular Function	2	3	1	0.188876	gene-LOC100800946;gene-LOC100794734
GO:0102345	3-hydroxy-lignoceroyl-CoA dehydratase activity	Molecular Function	2	3	1	0.188876	gene-LOC100818356;gene-LOC100527150
GO:0035243	protein-arginine omega-N symmetric methyltransferase activity	Molecular Function	2	3	1	0.188876	gene-LOC100779358;gene-LOC100799456
GO:0046408	chlorophyll synthetase activity	Molecular Function	2	3	1	0.188876	gene-LOC100787459;gene-LOC100779167
GO:0042625	ATPase coupled ion transmembrane transporter activity	Molecular Function	2	3	1	0.188876	gene-LOC100780523;gene-LOC100305531
GO:0102131	3-oxo-glutaryl-[acp] methyl ester reductase activity	Molecular Function	2	3	1	0.188876	gene-LOC100806814;gene-LOC100809809
GO:0008911	lactaldehyde dehydrogenase activity	Molecular Function	2	3	1	0.188876	gene-LOC100780041;gene-LOC100789100
GO:0003960	NADPH:quinone reductase activity	Molecular Function	2	3	1	0.188876	gene-LOC100791274;gene-LOC100793768
GO:0140034	methylation-dependent protein binding	Molecular Function	2	3	1	0.188876	gene-LOC100819331;gene-LOC100800393
GO:0003985	acetyl-CoA C-acetyltransferase activity	Molecular Function	2	3	1	0.188876	gene-LOC100500596;gene-LOC100804647
GO:0004314	[acyl-carrier-protein] S-malonyltransferase activity	Molecular Function	2	3	1	0.188876	gene-LOC100806812;gene-MT2
GO:0080124	pheophytinase activity	Molecular Function	2	3	1	0.188876	gene-LOC100802865;gene-LOC100791985
GO:0018812	3-hydroxyacyl-CoA dehydratase activity	Molecular Function	2	3	1	0.188876	gene-LOC100527150;gene-LOC100818356
GO:0031405	lipoic acid binding	Molecular Function	2	3	1	0.188876	gene-LOC100778218;gene-LOC100776242
GO:0102344	3-hydroxy-behenoyl-CoA dehydratase activity	Molecular Function	2	3	1	0.188876	gene-LOC100527150;gene-LOC100818356
GO:0003839	gamma-glutamylcyclotransferase activity	Molecular Function	2	3	1	0.188876	gene-LOC100305985;gene-LOC100793027
GO:0000035	acyl binding	Molecular Function	2	3	1	0.188876	gene-LOC100527750;gene-LOC100499669
GO:0003949	1-(5-phosphoribosyl)-5-[(5-phosphoribosylamino)methylideneamino]imidazole-4-carboxamide isomerase activity	Molecular Function	2	3	1	0.188876	gene-LOC100793426;gene-LOC100800577
GO:0047724	inosine nucleosidase activity	Molecular Function	2	3	1	0.188876	gene-LOC100787563;gene-LOC100818908
GO:0004839	ubiquitin activating enzyme activity	Molecular Function	2	3	1	0.188876	gene-LOC100799433;gene-LOC100811391
GO:0005080	protein kinase C binding	Molecular Function	2	3	1	0.188876	gene-LOC547868;gene-LOC100778205
GO:0017077	oxidative phosphorylation uncoupler activity	Molecular Function	2	3	1	0.188876	gene-LOC100820456;gene-LOC100816581
GO:0003689	DNA clamp loader activity	Molecular Function	2	3	1	0.188876	gene-LOC100802809;gene-LOC100790070
GO:0050662	coenzyme binding	Molecular Function	2	3	1	0.188876	gene-LOC100775953;gene-LOC100807200
GO:0008474	palmitoyl-(protein) hydrolase activity	Molecular Function	2	3	1	0.188876	gene-LOC100818152;gene-LOC100792376
GO:0102343	3-hydroxy-arachidoyl-CoA dehydratase activity	Molecular Function	2	3	1	0.188876	gene-LOC100818356;gene-LOC100527150
GO:0004149	dihydrolipoyllysine-residue succinyltransferase activity	Molecular Function	2	3	1	0.188876	gene-LOC106798008;gene-LOC100799149
GO:0051992	UDP-N-acetylmuramoyl-L-alanyl-D-glutamyl-meso-2,6-diaminopimelyl-D-alanyl-D-alanine:undecaprenyl-phosphate transferase activity	Molecular Function	2	3	1	0.188876	gene-LOC100811886;gene-LOC100789475
GO:0003919	FMN adenylyltransferase activity	Molecular Function	2	3	1	0.188876	gene-LOC100816619;gene-LOC100795114
GO:0030337	DNA polymerase processivity factor activity	Molecular Function	2	3	1	0.188876	gene-LOC100817651;gene-LOC548079
GO:0047150	betaine-homocysteine S-methyltransferase activity	Molecular Function	2	3	1	0.188876	gene-LOC100812265;gene-LOC100790567
GO:0102132	3-oxo-pimeloyl-[acp] methyl ester reductase activity	Molecular Function	2	3	1	0.188876	gene-LOC100806814;gene-LOC100809809
GO:0004750	ribulose-phosphate 3-epimerase activity	Molecular Function	2	3	1	0.188876	gene-LOC100786514;gene-LOC100817791
GO:0052745	inositol phosphate phosphatase activity	Molecular Function	2	3	1	0.188876	gene-PAP02;gene-LOC100815749
GO:0009540	zeaxanthin epoxidase [overall] activity	Molecular Function	2	3	1	0.188876	Glycine_max_newGene_1875;gene-ZEP
GO:0016314	phosphatidylinositol-3,4,5-trisphosphate 3-phosphatase activity	Molecular Function	2	3	1	0.188876	gene-LOC100801622;gene-LOC100807702
GO:0004316	3-oxoacyl-[acyl-carrier-protein] reductase (NADPH) activity	Molecular Function	2	3	1	0.188876	gene-LOC100806814;gene-LOC100809809
GO:0000104	succinate dehydrogenase activity	Molecular Function	2	3	1	0.188876	gene-LOC100818379;gene-LOC100803020
GO:0035299	inositol pentakisphosphate 2-kinase activity	Molecular Function	2	3	1	0.188876	gene-LOC100807360;gene-LOC100782468
GO:0015085	calcium ion transmembrane transporter activity	Molecular Function	2	3	1	0.188876	gene-LOC100785207;gene-LOC100786634
GO:0032450	maltose alpha-glucosidase activity	Molecular Function	2	3	1	0.188876	gene-LOC100808526;gene-LOC100802518
GO:0004399	histidinol dehydrogenase activity	Molecular Function	2	3	1	0.188876	gene-LOC100793496;gene-LOC100816684
GO:0034338	short-chain carboxylesterase activity	Molecular Function	2	3	1	0.188876	gene-LOC100809859;gene-LOC100802065
GO:0035091	phosphatidylinositol binding	Molecular Function	19	56	1	0.189269	gene-LOC100792151;gene-LOC100794899;gene-LOC100803729;gene-LOC100799499;gene-LOC100777506;gene-LOC100790491;gene-LOC100803851;gene-LOC100803157;gene-LOC100805161;gene-LOC100789039;gene-LOC100796250;gene-LOC100804887;gene-LOC100805370;gene-LOC100798958;gene-LOC100817169;gene-LOC100799279;gene-LOC100792216;gene-LOC100778290;gene-LOC100804649
GO:0009055	electron carrier activity	Molecular Function	75	247	1	0.201891	gene-LOC100777703;gene-LOC100500300;gene-LOC100527558;gene-LOC100811817;gene-LOC106794948;gene-LOC100305984;gene-LOC100499708;gene-LOC100808254;gene-LOC100306522;gene-LOC100305517;gene-LOC100305906;gene-LOC100306716;gene-LOC100500372;gene-LOC100780985;gene-LOC100786494;gene-LOC100790330;gene-LOC100306093;gene-LOC100810320;gene-LOC100803858;gene-LOC100306554;gene-LOC100789844;gene-LOC100789895;gen…
GO:0031625	ubiquitin protein ligase binding	Molecular Function	37	117	1	0.204282	gene-LOC100800784;gene-LOC100805974;gene-LOC100778680;gene-LOC100777561;gene-LOC100527864;gene-LOC100306626;gene-LOC100814664;gene-LOC100790186;gene-LOC100794443;gene-LOC100795347;gene-LOC102661702;gene-LOC100809598;gene-LOC100792206;gene-LOC100785758;gene-LOC100306398;gene-LOC100805741;gene-LOC100819650;gene-LOC100787262;Glycine_max_newGene_4097;gene-RFP1;gene-LOC100812651;gene-LOC100811623;gene…
GO:0003955	NAD(P)H dehydrogenase (quinone) activity	Molecular Function	8	21	1	0.205497	gene-LOC100789057;gene-LOC100305601;gene-LOC100807532;gene-LOC100811224;gene-LOC100788868;gene-LOC100499870;gene-LOC100499662;gene-LOC100805113
GO:0015036	disulfide oxidoreductase activity	Molecular Function	8	21	1	0.205497	gene-LOC100527038;gene-LOC100527081;gene-LOC100814030;gene-LOC100305959;gene-LOC100813627;gene-LOC100499858;gene-LOC100500580;gene-LOC100784029
GO:0008483	transaminase activity	Molecular Function	13	37	1	0.205526	gene-LOC100170733;gene-LOC100800509;gene-LOC100778188;gene-LOC100787173;gene-LOC100801405;gene-LOC100809241;gene-LOC100787587;gene-LOC100790143;gene-LOC100784392;gene-LOC100815181;gene-LOC100804017;Glycine_max_newGene_2593;gene-GSA1
GO:0008271	secondary active sulfate transmembrane transporter activity	Molecular Function	13	37	1	0.205526	gene-LOC100776591;gene-LOC100775789;gene-LOC100777637;gene-LOC100804670;gene-LOC100780331;Glycine_max_newGene_1479;Glycine_max_newGene_1480;gene-LOC100812617;gene-LOC100787694;gene-LOC100815251;gene-LOC100797668;gene-LOC100794754;gene-LOC100787284
GO:0016668	oxidoreductase activity, acting on a sulfur group of donors, NAD(P) as acceptor	Molecular Function	7	18	1	0.211318	gene-LOC100305959;gene-LOC100814030;gene-LOC100527081;gene-LOC100527038;gene-LOC100499858;gene-LOC100813627;gene-LOC100784029
GO:0101005	ubiquitinyl hydrolase activity	Molecular Function	7	18	1	0.211318	gene-LOC100796813;gene-LOC100804405;gene-LOC100788399;gene-LOC100809235;Glycine_max_newGene_2865;gene-LOC100797619;gene-LOC100786432
GO:0016746	transferase activity, transferring acyl groups	Molecular Function	12	34	1	0.213279	gene-LOC100794544;gene-LOC100818476;gene-LOC100812696;gene-LOC100795690;gene-LOC100806931;gene-LOC100781175;gene-LOC100778962;gene-LOC100789791;gene-LOC100780758;gene-LOC100814885;gene-LOC102664482;gene-LOC100781294
GO:0042393	histone binding	Molecular Function	33	104	1	0.214001	gene-LOC100800393;gene-LOC100817519;gene-LOC100785519;gene-LOC100819621;gene-LOC100788998;gene-LOC100799986;gene-GMPHD6;gene-LOC100779284;gene-LOC100779170;gene-LOC100789496;gene-LOC100778198;gene-LOC100813123;Glycine_max_newGene_5660;Glycine_max_newGene_11213;Glycine_max_newGene_8104;gene-LOC100799455;gene-LOC100784411;gene-LOC100796167;gene-LOC100803849;gene-LOC100819092;gene-LOC100812080;gene-…
GO:0003779	actin binding	Molecular Function	22	67	1	0.214142	gene-LOC100796648;gene-LOC100785493;gene-LOC100793194;gene-LOC100780824;gene-LOC100527736;gene-LOC100819020;gene-LOC100787384;gene-LOC100795255;gene-LOC100783309;gene-LOC100798320;gene-LOC100778688;gene-LOC100819872;gene-LOC100785378;gene-LOC100816432;gene-LOC100800597;gene-LOC100775755;gene-LOC100814445;gene-LOC100798334;gene-LOC100500025;gene-LOC100810726;gene-LOC100793035;gene-LOC100785640
GO:0045552	dihydrokaempferol 4-reductase activity	Molecular Function	3	6	1	0.216069	gene-LOC100806281;gene-LOC100778253;gene-LOC100789070
GO:0001871	pattern binding	Molecular Function	3	6	1	0.216069	gene-LOC100792611;gene-LOC100797001;gene-LOC100795997
GO:0001102	RNA polymerase II activating transcription factor binding	Molecular Function	3	6	1	0.216069	gene-LOC100816886;gene-LOC547529;gene-LOC100777805
GO:0008378	galactosyltransferase activity	Molecular Function	3	6	1	0.216069	gene-DGD2;gene-LOC100778769;gene-LOC100777005
GO:0004412	homoserine dehydrogenase activity	Molecular Function	3	6	1	0.216069	gene-LOC732566;gene-AK-HSDH;gene-LOC100812202
GO:0003988	acetyl-CoA C-acyltransferase activity	Molecular Function	3	6	1	0.216069	gene-LOC100789930;gene-LOC547735;gene-LOC100500596
GO:0001727	lipid kinase activity	Molecular Function	3	6	1	0.216069	gene-LOC100792824;gene-LOC100788629;gene-LOC100805656
GO:0047840	dCTP diphosphatase activity	Molecular Function	3	6	1	0.216069	gene-LOC106798062;gene-LOC100500294;gene-LOC100306684
GO:0004430	1-phosphatidylinositol 4-kinase activity	Molecular Function	3	6	1	0.216069	gene-LOC100784942;gene-LOC100777069;gene-LOC100811499
GO:0003984	acetolactate synthase activity	Molecular Function	3	6	1	0.216069	gene-LOC100798203;gene-LOC100779210;gene-LOC100810297
GO:0046920	alpha-(1->3)-fucosyltransferase activity	Molecular Function	3	6	1	0.216069	gene-LOC100776065;gene-LOC100792811;gene-LOC100792300
GO:0003873	6-phosphofructo-2-kinase activity	Molecular Function	3	6	1	0.216069	gene-LOC100816757;gene-LOC100798990;gene-LOC100796785
GO:0016212	kynurenine-oxoglutarate transaminase activity	Molecular Function	3	6	1	0.216069	gene-LOC100818968;gene-LOC100776219;gene-LOC100803887
GO:0035252	UDP-xylosyltransferase activity	Molecular Function	3	6	1	0.216069	gene-LOC100810186;gene-LOC100816008;gene-LOC100812319
GO:0004765	shikimate kinase activity	Molecular Function	3	6	1	0.216069	gene-LOC100797982;gene-LOC102667853;gene-LOC100784290
GO:0008883	glutamyl-tRNA reductase activity	Molecular Function	3	6	1	0.216069	gene-LOC100782247;gene-LOC100815985;gene-LOC100819951
GO:0106029	tRNA pseudouridine synthase activity	Molecular Function	3	6	1	0.216069	gene-LOC100802586;gene-LOC100799818;gene-LOC100789957
GO:0000285	1-phosphatidylinositol-3-phosphate 5-kinase activity	Molecular Function	3	6	1	0.216069	gene-LOC100815340;gene-LOC100809696;gene-LOC100782480
GO:0047911	galacturan 1,4-alpha-galacturonidase activity	Molecular Function	3	6	1	0.216069	gene-LOC100809979;gene-LOC732602;gene-LOC100783813
GO:1990137	plant seed peroxidase activity	Molecular Function	3	6	1	0.216069	gene-LOC100802743;gene-LOC100306686;gene-LOC100800915
GO:0051991	UDP-N-acetyl-D-glucosamine:N-acetylmuramoyl-L-alanyl-D-glutamyl-meso-2,6-diaminopimelyl-D-alanyl-D-alanine-diphosphoundecaprenol 4-beta-N-acetylglucosaminlytransferase activity	Molecular Function	3	6	1	0.216069	gene-LOC100809466;gene-MGD1;gene-LOC100797391
GO:0004311	farnesyltranstransferase activity	Molecular Function	3	6	1	0.216069	gene-LOC100785539;gene-LOC100806314;gene-LOC100782362
GO:0047938	glucose-6-phosphate 1-epimerase activity	Molecular Function	6	15	1	0.216565	gene-LOC100801977;gene-LOC100782415;gene-LOC100787217;gene-LOC100801138;gene-LOC100787970;gene-LOC100797902
GO:0019706	protein-cysteine S-palmitoyltransferase activity	Molecular Function	15	44	1	0.219514	gene-LOC100788728;gene-LOC100798857;gene-LOC100818705;gene-LOC100790525;gene-LOC100815457;gene-LOC102668608;gene-LOC100781693;gene-LOC100809998;gene-LOC100803007;gene-LOC100776382;gene-LOC100792069;gene-LOC100818808;Glycine_max_newGene_9611;gene-LOC100818912;gene-LOC100780559
GO:0005471	ATP:ADP antiporter activity	Molecular Function	5	12	1	0.220545	gene-LOC100802404;gene-LOC100785990;gene-LOC100802974;gene-LOC100775892;gene-LOC100797251
GO:0004571	mannosyl-oligosaccharide 1,2-alpha-mannosidase activity	Molecular Function	5	12	1	0.220545	gene-LOC100819189;gene-MAN1;gene-LOC100789211;gene-LOC100785235;gene-LOC100806551
GO:0033897	ribonuclease T2 activity	Molecular Function	5	12	1	0.220545	gene-LOC100306447;gene-LOC100782011;gene-LOC100815624;gene-LOC100305644;gene-LOC100789614
GO:0008157	protein phosphatase 1 binding	Molecular Function	5	12	1	0.220545	Glycine_max_newGene_901;gene-LOC100802370;gene-LOC100808971;gene-LOC100809687;gene-LOC100527761
GO:0004359	glutaminase activity	Molecular Function	5	12	1	0.220545	gene-LOC100500353;gene-LOC100815533;gene-LOC100804904;gene-LOC100786227;gene-LOC100777145
GO:0017112	Rab guanyl-nucleotide exchange factor activity	Molecular Function	5	12	1	0.220545	gene-LOC100813760;gene-LOC100782429;gene-LOC100790861;gene-LOC100780852;gene-LOC100802342
GO:0008379	thioredoxin peroxidase activity	Molecular Function	4	9	1	0.221725	gene-LOC100500627;gene-LOC100500096;gene-LOC100783307;gene-LOC100500610
GO:0031177	phosphopantetheine binding	Molecular Function	4	9	1	0.221725	gene-LOC100499916;gene-LOC100784363;gene-LOC100527378;gene-LOC100306095
GO:0016864	intramolecular oxidoreductase activity, transposing S-S bonds	Molecular Function	4	9	1	0.221725	gene-LOC100499858;gene-LOC100813627;gene-LOC100499960;gene-LOC100813728
GO:0008107	galactoside 2-alpha-L-fucosyltransferase activity	Molecular Function	4	9	1	0.221725	gene-LOC100799776;gene-LOC100787812;gene-LOC100803305;gene-LOC100775878
GO:0004134	4-alpha-glucanotransferase activity	Molecular Function	4	9	1	0.221725	gene-LOC100795007;gene-LOC100789996;gene-LOC100785271;gene-LOC100781780
GO:0015450	P-P-bond-hydrolysis-driven protein transmembrane transporter activity	Molecular Function	4	9	1	0.221725	gene-LOC100789824;gene-LOC100306386;gene-LOC100805604;gene-LOC100527335
GO:0016730	oxidoreductase activity, acting on iron-sulfur proteins as donors	Molecular Function	4	9	1	0.221725	Glycine_max_newGene_4088;gene-LOC100810598;gene-LOC100784314;gene-LOC100785186
GO:0022857	transmembrane transporter activity	Molecular Function	159	542	1	0.223823	gene-LOC100779373;gene-LOC100804903;gene-LOC100811617;gene-LOC100809973;gene-LOC100796365;gene-LOC100779959;gene-LOC100798162;Glycine_max_newGene_5248;gene-LOC100814137;gene-LOC100786532;gene-LOC100790274;gene-LOC100790349;gene-LOC100814869;gene-LOC100782873;gene-LOC100820526;gene-LOC102668139;gene-LOC100786465;gene-LOC100801109;gene-LOC100781298;gene-LOC100785777;gene-LOC100798432;gene-LOC100786…
GO:0017076	purine nucleotide binding	Molecular Function	10	28	1	0.230092	gene-LOC100306535;gene-GF14A;gene-LOC100780156;gene-LOC100805150;gene-LOC100807200;gene-LOC100798779;gene-LOC100527623;gene-LOC100775953;gene-LOC100804158;gene-LOC100500682
GO:0051903	S-(hydroxymethyl)glutathione dehydrogenase activity	Molecular Function	9	25	1	0.239225	gene-LOC100788587;gene-LOC100500200;gene-LOC100500201;gene-LOC100800668;gene-LOC100816775;gene-LOC547658;gene-LOC100788053;gene-LOC100802431;gene-LOC100819938
GO:0015086	cadmium ion transmembrane transporter activity	Molecular Function	9	25	1	0.239225	gene-LOC100803531;gene-GMNRAMP3A;gene-GMNRAMP2A;gene-GMNRAMP1A;gene-LOC100805118;gene-DMT1;gene-GMNRAMP1B;gene-LOC100797536;gene-LOC100776339
GO:0005509	calcium ion binding	Molecular Function	137	468	1	0.251816	gene-LOC100805954;gene-LOC100804468;gene-LOC100776185;gene-LOC100793170;gene-LOC100799972;gene-LOC100527439;gene-LOC100786410;gene-LOC100815664;gene-LOC100791045;gene-LOC100800868;gene-LOC100801827;gene-LOC100815559;gene-LOC100801943;gene-LOC100786047;gene-LOC100806983;gene-LOC100799062;gene-LOC100794511;gene-LOC100814445;gene-LOC100792664;gene-LOC100786354;gene-LOC100818652;gene-LOC100783922;gen…
GO:0051087	chaperone binding	Molecular Function	25	79	1	0.258235	gene-LOC100790513;gene-LOC100775897;gene-LOC100814935;gene-LOC100306488;gene-LOC100306384;gene-LOC100798830;gene-LOC100794650;gene-LOC100819939;gene-CBP;gene-LOC100777607;gene-LOC100527476;Glycine_max_newGene_10720;Glycine_max_newGene_7537;gene-LOC100804915;gene-LOC100820130;gene-LOC100810706;gene-LOC100805173;gene-LOC100786421;gene-LOC100800682;gene-LOC100799120;gene-LOC100804763;gene-LOC1007899…
GO:0051879	Hsp90 protein binding	Molecular Function	7	19	1	0.259125	gene-LOC100810706;gene-LOC100798465;gene-HOP1;gene-LOC100780296;gene-LOC100527476;gene-LOC100819939;Glycine_max_newGene_10720
GO:0016844	strictosidine synthase activity	Molecular Function	7	19	1	0.259125	gene-LOC100804714;gene-LOC100786909;gene-LOC100812289;gene-LOC100815025;gene-LOC100798788;gene-LOC100788609;gene-LOC100803331
GO:0005388	calcium-transporting ATPase activity	Molecular Function	10	29	1	0.26918	gene-SCA2;gene-LOC100790157;gene-LOC100783509;gene-LOC100812151;gene-LOC100783489;gene-LOC100791934;gene-LOC100777845;gene-LOC100785768;gene-LOC100813841;gene-LOC100777143
GO:0045505	dynein intermediate chain binding	Molecular Function	6	16	1	0.269929	gene-LOC100305908;gene-LOC100305536;gene-LOC100805980;gene-LOC100500277;gene-LOC100808023;gene-LOC100527842
GO:0051959	dynein light intermediate chain binding	Molecular Function	6	16	1	0.269929	gene-LOC100305908;gene-LOC100305536;gene-LOC100805980;gene-LOC100500277;gene-LOC100808023;gene-LOC100527842
GO:0015369	calcium:proton antiporter activity	Molecular Function	6	16	1	0.269929	gene-LOC100806000;gene-LOC100778821;gene-LOC100802344;gene-LOC100797538;gene-LOC100816844;gene-LOC100816231
GO:0140030	modification-dependent protein binding	Molecular Function	6	16	1	0.269929	gene-LOC100819331;gene-LOC100800393;gene-LOC100793896;gene-LOC100814594;gene-LOC100799455;gene-LOC100799986
GO:0035241	protein-arginine omega-N monomethyltransferase activity	Molecular Function	1	1	1	0.278002	gene-LOC100785846
GO:0097163	sulfur carrier activity	Molecular Function	1	1	1	0.278002	gene-LOC100306072
GO:0046912	transferase activity, transferring acyl groups, acyl groups converted into alkyl on transfer	Molecular Function	1	1	1	0.278002	gene-LOC100780205
GO:0004798	thymidylate kinase activity	Molecular Function	1	1	1	0.278002	gene-LOC100778161
GO:0098973	structural constituent of postsynaptic actin cytoskeleton	Molecular Function	1	1	1	0.278002	gene-LOC100803056
GO:0102550	2-methyl-6-geranylgeranyl-1,4-benzoquinol methyltransferase activity	Molecular Function	1	1	1	0.278002	gene-LOC100783986
GO:0004635	phosphoribosyl-AMP cyclohydrolase activity	Molecular Function	1	1	1	0.278002	gene-LOC100807276
GO:0071522	ureidoglycine aminohydrolase activity	Molecular Function	1	1	1	0.278002	gene-LOC100781644
GO:0003948	N4-(beta-N-acetylglucosaminyl)-L-asparaginase activity	Molecular Function	1	1	1	0.278002	gene-LOC100527747
GO:0008942	nitrite reductase [NAD(P)H] activity	Molecular Function	1	1	1	0.278002	Glycine_max_newGene_2696
GO:0052669	CTP:2-trans,-6-trans-farnesol kinase activity	Molecular Function	1	1	1	0.278002	gene-LOC100793696
GO:0045290	D-arabinose 1-dehydrogenase [NAD(P)+] activity	Molecular Function	1	1	1	0.278002	gene-LOC100777124
GO:0030627	pre-mRNA 5'-splice site binding	Molecular Function	1	1	1	0.278002	gene-LOC100795821
GO:0051751	alpha-1,4-mannosyltransferase activity	Molecular Function	1	1	1	0.278002	gene-LOC100786062
GO:0047958	glycine:2-oxoglutarate aminotransferase activity	Molecular Function	1	1	1	0.278002	gene-ALAAT2
GO:0010276	phytol kinase activity	Molecular Function	1	1	1	0.278002	gene-LOC100802421
GO:0032216	glucosaminyl-phosphotidylinositol O-acyltransferase activity	Molecular Function	1	1	1	0.278002	gene-LOC100811353
GO:0003838	sterol 24-C-methyltransferase activity	Molecular Function	1	1	1	0.278002	gene-LOC100817534
GO:0030409	glutamate formimidoyltransferase activity	Molecular Function	1	1	1	0.278002	gene-LOC100499724
GO:0008756	o-succinylbenzoate-CoA ligase activity	Molecular Function	1	1	1	0.278002	gene-LOC100787691
GO:0008398	sterol 14-demethylase activity	Molecular Function	1	1	1	0.278002	gene-LOC100810799
GO:0043842	Kdo transferase activity	Molecular Function	1	1	1	0.278002	gene-LOC100809456
GO:0004691	cAMP-dependent protein kinase activity	Molecular Function	1	1	1	0.278002	gene-LOC100781992
GO:0019103	pyrimidine nucleotide binding	Molecular Function	1	1	1	0.278002	gene-LOC100798779
GO:0102732	myo-inositol-1,2,3,4,6-heptakisphosphate 5-kinase activity	Molecular Function	1	1	1	0.278002	gene-IPK2
GO:0009496	plastoquinol--plastocyanin reductase activity	Molecular Function	1	1	1	0.278002	gene-PETC
GO:0051765	inositol tetrakisphosphate kinase activity	Molecular Function	1	1	1	0.278002	gene-IPK2
GO:0004113	2',3'-cyclic-nucleotide 3'-phosphodiesterase activity	Molecular Function	1	1	1	0.278002	gene-LOC100799568
GO:0098519	nucleotide phosphatase activity, acting on free nucleotides	Molecular Function	1	1	1	0.278002	gene-LOC100527302
GO:0046509	1,2-diacylglycerol 3-beta-galactosyltransferase activity	Molecular Function	1	1	1	0.278002	gene-MGD1
GO:0051060	pullulanase activity	Molecular Function	1	1	1	0.278002	gene-LOC100780405
GO:0047627	adenylylsulfatase activity	Molecular Function	1	1	1	0.278002	gene-LOC100785079
GO:0008115	sarcosine oxidase activity	Molecular Function	1	1	1	0.278002	gene-LOC100789864
GO:0003905	alkylbase DNA N-glycosylase activity	Molecular Function	1	1	1	0.278002	gene-LOC100813424
GO:0008693	3-hydroxydecanoyl-[acyl-carrier-protein] dehydratase activity	Molecular Function	1	1	1	0.278002	gene-LOC100790839
GO:0102043	isopentenyl phosphate kinase activity	Molecular Function	1	1	1	0.278002	gene-LOC100792453
GO:0018454	acetoacetyl-CoA reductase activity	Molecular Function	1	1	1	0.278002	gene-LOC100817128
GO:0019136	deoxynucleoside kinase activity	Molecular Function	1	1	1	0.278002	gene-LOC100799545
GO:0000823	inositol-1,4,5-trisphosphate 6-kinase activity	Molecular Function	1	1	1	0.278002	gene-IPK2
GO:0070566	adenylyltransferase activity	Molecular Function	1	1	1	0.278002	Glycine_max_newGene_5029
GO:0050613	delta14-sterol reductase activity	Molecular Function	1	1	1	0.278002	Glycine_max_newGene_5400
GO:0071424	rRNA (cytosine-N4-)-methyltransferase activity	Molecular Function	1	1	1	0.278002	gene-LOC100813897
GO:0103117	UDP-3-O-acyl-N-acetylglucosamine deacetylase activity	Molecular Function	1	1	1	0.278002	gene-LOC100814465
GO:0004768	stearoyl-CoA 9-desaturase activity	Molecular Function	1	1	1	0.278002	gene-SAD2
GO:0044715	8-oxo-dGDP phosphatase activity	Molecular Function	1	1	1	0.278002	gene-LOC100802005
GO:0008928	mannose-1-phosphate guanylyltransferase (GDP) activity	Molecular Function	1	1	1	0.278002	gene-LOC100808375
GO:0008759	UDP-3-O-[3-hydroxymyristoyl] N-acetylglucosamine deacetylase activity	Molecular Function	1	1	1	0.278002	gene-LOC100814465
GO:0004746	riboflavin synthase activity	Molecular Function	1	1	1	0.278002	gene-LOC100809163
GO:0019776	Atg8 ligase activity	Molecular Function	1	1	1	0.278002	gene-LOC100806054
GO:0008440	inositol-1,4,5-trisphosphate 3-kinase activity	Molecular Function	1	1	1	0.278002	gene-IPK2
GO:0000248	C-5 sterol desaturase activity	Molecular Function	1	1	1	0.278002	gene-LOC100782638
GO:0008114	phosphogluconate 2-dehydrogenase activity	Molecular Function	1	1	1	0.278002	gene-LOC100803740
GO:0010488	UDP-galactose:N-glycan beta-1,3-galactosyltransferase activity	Molecular Function	1	1	1	0.278002	gene-LOC100782548
GO:0033788	leucoanthocyanidin reductase activity	Molecular Function	1	1	1	0.278002	gene-LAR1
GO:0070773	protein-N-terminal glutamine amidohydrolase activity	Molecular Function	1	1	1	0.278002	gene-LOC100806607
GO:0010280	UDP-L-rhamnose synthase activity	Molecular Function	1	1	1	0.278002	Glycine_max_newGene_2371
GO:0045431	flavonol synthase activity	Molecular Function	1	1	1	0.278002	gene-FLS1
GO:0008108	UDP-glucose:hexose-1-phosphate uridylyltransferase activity	Molecular Function	1	1	1	0.278002	gene-LOC100777342
GO:0050124	N-acylneuraminate-9-phosphatase activity	Molecular Function	1	1	1	0.278002	gene-LOC100814470
GO:0002196	Ser-tRNA(Ala) hydrolase activity	Molecular Function	1	1	1	0.278002	gene-LOC100781401
GO:0004555	alpha,alpha-trehalase activity	Molecular Function	1	1	1	0.278002	gene-GMTRE1
GO:0050354	triokinase activity	Molecular Function	1	1	1	0.278002	gene-LOC100801639
GO:0010486	manganese:proton antiporter activity	Molecular Function	1	1	1	0.278002	gene-LOC100776339
GO:0018580	nitronate monooxygenase activity	Molecular Function	1	1	1	0.278002	gene-LOC100785537
GO:0003848	2-amino-4-hydroxy-6-hydroxymethyldihydropteridine diphosphokinase activity	Molecular Function	1	1	1	0.278002	gene-LOC100808899
GO:0047632	agmatine deiminase activity	Molecular Function	1	1	1	0.278002	gene-LOC100811750
GO:0050174	phenylalanine decarboxylase activity	Molecular Function	1	1	1	0.278002	gene-LOC100815568
GO:0004662	CAAX-protein geranylgeranyltransferase activity	Molecular Function	1	1	1	0.278002	gene-LOC100783982
GO:0043136	glycerol-3-phosphatase activity	Molecular Function	1	1	1	0.278002	gene-LOC100786174
GO:0003867	4-aminobutyrate transaminase activity	Molecular Function	1	1	1	0.278002	gene-LOC100792355
GO:0008825	cyclopropane-fatty-acyl-phospholipid synthase activity	Molecular Function	1	1	1	0.278002	gene-LOC100807054
GO:0005496	steroid binding	Molecular Function	1	1	1	0.278002	gene-LOC100775781
GO:1990889	H4K20me3 modified histone binding	Molecular Function	1	1	1	0.278002	gene-LOC100800393
GO:0015410	manganese-transporting ATPase activity	Molecular Function	1	1	1	0.278002	gene-LOC100783509
GO:0008466	glycogenin glucosyltransferase activity	Molecular Function	1	1	1	0.278002	gene-LOC100794824
GO:0004312	fatty acid synthase activity	Molecular Function	1	1	1	0.278002	gene-LOC100806931
GO:0048027	mRNA 5'-UTR binding	Molecular Function	1	1	1	0.278002	gene-LOC100799648
GO:0008908	isochorismatase activity	Molecular Function	1	1	1	0.278002	gene-LOC100527482
GO:0004608	phosphatidylethanolamine N-methyltransferase activity	Molecular Function	1	1	1	0.278002	gene-PLMT
GO:0004400	histidinol-phosphate transaminase activity	Molecular Function	1	1	1	0.278002	gene-LOC100784293
GO:0047545	2-hydroxyglutarate dehydrogenase activity	Molecular Function	1	1	1	0.278002	gene-LOC100798359
GO:0004668	protein-arginine deiminase activity	Molecular Function	1	1	1	0.278002	gene-LOC100811750
GO:0047326	inositol tetrakisphosphate 5-kinase activity	Molecular Function	1	1	1	0.278002	gene-IPK2
GO:0080101	phosphatidyl-N-dimethylethanolamine N-methyltransferase activity	Molecular Function	1	1	1	0.278002	gene-PLMT
GO:0052670	geraniol kinase activity	Molecular Function	1	1	1	0.278002	gene-LOC100793696
GO:0008898	S-adenosylmethionine-homocysteine S-methyltransferase activity	Molecular Function	1	1	1	0.278002	gene-LOC100790567
GO:0102751	UDP-alpha-D-glucose:glucosyl-glycogenin alpha-D-glucosyltransferase activity	Molecular Function	1	1	1	0.278002	gene-LOC100794824
GO:0042826	histone deacetylase binding	Molecular Function	1	1	1	0.278002	gene-LOC100807878
GO:0003998	acylphosphatase activity	Molecular Function	1	1	1	0.278002	gene-LOC100796414
GO:0016670	oxidoreductase activity, acting on a sulfur group of donors, oxygen as acceptor	Molecular Function	1	1	1	0.278002	gene-LOC100819877
GO:0016646	oxidoreductase activity, acting on the CH-NH group of donors, NAD or NADP as acceptor	Molecular Function	1	1	1	0.278002	gene-LOC100777124
GO:0047381	dodecanoyl-[acyl-carrier-protein] hydrolase activity	Molecular Function	1	1	1	0.278002	gene-LOC100806931
GO:0045703	ketoreductase activity	Molecular Function	1	1	1	0.278002	gene-LOC100816067
GO:0019779	Atg8 activating enzyme activity	Molecular Function	1	1	1	0.278002	gene-GMATG7
GO:0001227	transcriptional repressor activity, RNA polymerase II transcription regulatory region sequence-specific binding	Molecular Function	1	1	1	0.278002	gene-LOC100499955
GO:0004661	protein geranylgeranyltransferase activity	Molecular Function	1	1	1	0.278002	gene-LOC100788428
GO:0030775	glucuronoxylan 4-O-methyltransferase activity	Molecular Function	1	1	1	0.278002	gene-LOC100780444
GO:0008659	(3R)-hydroxymyristoyl-[acyl-carrier-protein] dehydratase activity	Molecular Function	1	1	1	0.278002	gene-LOC100790839
GO:0050614	delta24-sterol reductase activity	Molecular Function	1	1	1	0.278002	gene-LOC100791799
GO:0015367	oxoglutarate:malate antiporter activity	Molecular Function	1	1	1	0.278002	gene-LOC100807439
GO:0052671	geranylgeraniol kinase activity	Molecular Function	1	1	1	0.278002	gene-LOC100793696
GO:0004745	retinol dehydrogenase activity	Molecular Function	1	1	1	0.278002	gene-LOC100776273
GO:0004596	peptide alpha-N-acetyltransferase activity	Molecular Function	1	1	1	0.278002	gene-LOC100806790
GO:0003827	alpha-1,3-mannosylglycoprotein 2-beta-N-acetylglucosaminyltransferase activity	Molecular Function	1	1	1	0.278002	gene-LOC100795005
GO:0004081	bis(5'-nucleosyl)-tetraphosphatase (asymmetrical) activity	Molecular Function	1	1	1	0.278002	gene-LOC100809942
GO:0030378	serine racemase activity	Molecular Function	1	1	1	0.278002	gene-LOC100799758
GO:0016656	monodehydroascorbate reductase (NADH) activity	Molecular Function	1	1	1	0.278002	gene-LOC100787700
GO:0019778	Atg12 activating enzyme activity	Molecular Function	1	1	1	0.278002	gene-GMATG7
GO:0019150	D-ribulokinase activity	Molecular Function	1	1	1	0.278002	gene-LOC100779892
GO:0004328	formamidase activity	Molecular Function	1	1	1	0.278002	gene-LOC100527923
GO:0042281	dolichyl pyrophosphate Man9GlcNAc2 alpha-1,3-glucosyltransferase activity	Molecular Function	1	1	1	0.278002	gene-LOC100809881
GO:0004413	homoserine kinase activity	Molecular Function	1	1	1	0.278002	gene-LOC100789754
GO:0004490	methylglutaconyl-CoA hydratase activity	Molecular Function	1	1	1	0.278002	gene-LOC100526933
GO:0033721	aldehyde dehydrogenase (NADP+) activity	Molecular Function	1	1	1	0.278002	gene-LOC100800699
GO:0004317	3-hydroxypalmitoyl-[acyl-carrier-protein] dehydratase activity	Molecular Function	1	1	1	0.278002	gene-LOC100790839
GO:0019153	protein-disulfide reductase (glutathione) activity	Molecular Function	1	1	1	0.278002	gene-LOC100797135
GO:0008453	alanine-glyoxylate transaminase activity	Molecular Function	1	1	1	0.278002	gene-ALAAT2
GO:0016645	oxidoreductase activity, acting on the CH-NH group of donors	Molecular Function	1	1	1	0.278002	gene-LOC100777124
GO:0052662	zeaxanthin epoxidase activity	Molecular Function	1	1	1	0.278002	Glycine_max_newGene_1875
GO:0047964	glyoxylate reductase activity	Molecular Function	1	1	1	0.278002	gene-LOC100779623
GO:0015019	heparan-alpha-glucosaminide N-acetyltransferase activity	Molecular Function	1	1	1	0.278002	gene-LOC100812497
GO:0035560	pheophoridase activity	Molecular Function	1	1	1	0.278002	gene-LOC100795903
GO:0047451	3-hydroxyoctanoyl-[acyl-carrier-protein] dehydratase activity	Molecular Function	1	1	1	0.278002	gene-LOC100790839
GO:0000773	phosphatidyl-N-methylethanolamine N-methyltransferase activity	Molecular Function	1	1	1	0.278002	gene-PLMT
GO:0004838	L-tyrosine:2-oxoglutarate aminotransferase activity	Molecular Function	1	1	1	0.278002	gene-LOC100785132
GO:0016295	myristoyl-[acyl-carrier-protein] hydrolase activity	Molecular Function	1	1	1	0.278002	gene-LOC100806931
GO:0003837	beta-ureidopropionase activity	Molecular Function	1	1	1	0.278002	gene-LOC100792563
GO:0004454	ketohexokinase activity	Molecular Function	1	1	1	0.278002	gene-LOC100802550
GO:0004301	epoxide hydrolase activity	Molecular Function	1	1	1	0.278002	gene-LOC100790275
GO:0047834	D-threo-aldose 1-dehydrogenase activity	Molecular Function	1	1	1	0.278002	gene-LOC100809400
GO:0001653	peptide receptor activity	Molecular Function	1	1	1	0.278002	gene-LOC100814594
GO:0010349	L-galactose dehydrogenase activity	Molecular Function	1	1	1	0.278002	gene-LOC100777124
GO:0002083	4-hydroxybenzoate decaprenyltransferase activity	Molecular Function	1	1	1	0.278002	gene-LOC100797753
GO:0003726	double-stranded RNA adenosine deaminase activity	Molecular Function	1	1	1	0.278002	gene-LOC100789591
GO:0015105	arsenite transmembrane transporter activity	Molecular Function	1	1	1	0.278002	gene-LOC100781849
GO:0047259	glucomannan 4-beta-mannosyltransferase activity	Molecular Function	1	1	1	0.278002	gene-LOC100797495
GO:0016296	palmitoyl-[acyl-carrier-protein] hydrolase activity	Molecular Function	1	1	1	0.278002	gene-LOC100806931
GO:0052684	L-serine hydro-lyase (adding indole, L-tryptophan-forming) activity	Molecular Function	1	1	1	0.278002	gene-LOC100802258
GO:0004398	histidine decarboxylase activity	Molecular Function	1	1	1	0.278002	gene-LOC100815568
GO:0046923	ER retention sequence binding	Molecular Function	5	13	1	0.281243	gene-LOC100797621;gene-LOC100527553;gene-LOC100306692;gene-LOC100780011;gene-LOC100775613
GO:0004462	lactoylglutathione lyase activity	Molecular Function	5	13	1	0.281243	gene-LOC547581;gene-GMGLYI-7;gene-GMGLYI-1;gene-GMGLYI-11;gene-GMGLYI-3
GO:0004372	glycine hydroxymethyltransferase activity	Molecular Function	5	13	1	0.281243	gene-LOC100816213;gene-LOC100815417;gene-SHMT;gene-LOC100812952;gene-LOC100776419
GO:0034647	histone demethylase activity (H3-trimethyl-K4 specific)	Molecular Function	5	13	1	0.281243	gene-LOC100810972;gene-LOC100775271;gene-LOC100798611;gene-LOC100306287;gene-LOC100775813
GO:0003680	AT DNA binding	Molecular Function	25	80	1	0.282018	gene-LOC100788026;gene-LOC100783475;gene-LOC100811243;gene-LOC100795303;gene-LOC100808432;gene-LOC100796830;gene-LOC100798706;gene-LOC100803208;gene-LOC102667678;gene-LOC100801730;Glycine_max_newGene_7844;gene-LOC100791563;gene-LOC100794202;gene-LOC100812673;gene-LOC100793726;gene-LOC100802542;gene-LOC100789687;gene-LOC100790569;gene-LOC100813888;gene-LOC100779227;gene-LOC100795781;gene-LOC100799…
GO:0043424	protein histidine kinase binding	Molecular Function	12	36	1	0.283087	gene-LOC100790880;gene-LOC100306665;gene-LOC100305640;gene-LOC100500044;gene-LOC100789295;gene-HIR1;gene-LOC100789608;gene-LOC100804982;gene-LOC100306559;gene-HIR3;gene-LOC100776020;gene-LOC100306589
GO:0004129	cytochrome-c oxidase activity	Molecular Function	4	10	1	0.292801	gene-LOC100499808;gene-LOC100527245;gene-LOC100527520;gene-LOC100782702
GO:0016860	intramolecular oxidoreductase activity	Molecular Function	4	10	1	0.292801	gene-LOC100813728;gene-LOC100499960;gene-LOC100813627;gene-LOC100499858
GO:0004488	methylenetetrahydrofolate dehydrogenase (NADP+) activity	Molecular Function	4	10	1	0.292801	gene-LOC100797215;gene-LOC100819231;gene-LOC100791604;gene-LOC100792682
GO:0003885	D-arabinono-1,4-lactone oxidase activity	Molecular Function	4	10	1	0.292801	gene-LOC100526948;gene-LOC100806810;gene-LOC100793515;gene-LOC100778616
GO:0004146	dihydrofolate reductase activity	Molecular Function	4	10	1	0.292801	gene-LOC100786670;gene-LOC100786329;gene-DHFR-TS;gene-LOC100783842
GO:1902387	ceramide 1-phosphate binding	Molecular Function	4	10	1	0.292801	gene-LOC100803299;gene-LOC100499750;gene-LOC100527133;gene-LOC100499964
GO:1990837	sequence-specific double-stranded DNA binding	Molecular Function	4	10	1	0.292801	gene-LOC100801868;gene-GT-2B;gene-LOC100795995;gene-LOC102664297
GO:1902388	ceramide 1-phosphate transporter activity	Molecular Function	4	10	1	0.292801	gene-LOC100499750;gene-LOC100803299;gene-LOC100499964;gene-LOC100527133
GO:0009678	hydrogen-translocating pyrophosphatase activity	Molecular Function	4	10	1	0.292801	gene-LOC100787805;gene-LOC100793677;gene-LOC100784465;gene-LOC100775864
GO:0017108	5'-flap endonuclease activity	Molecular Function	8	23	1	0.29485	gene-LOC100779848;gene-LOC100798062;gene-LOC100788794;gene-LOC100793881;gene-LOC100791251;gene-LOC100808044;gene-LOC100801178;gene-LOC100792878
GO:0005319	lipid transporter activity	Molecular Function	8	23	1	0.29485	gene-LOC100797297;gene-LOC100783495;gene-LOC100785793;gene-LOC100776009;gene-LOC100813262;gene-LOC100784611;gene-LOC100792897;gene-LOC100795551
GO:0016758	transferase activity, transferring hexosyl groups	Molecular Function	8	23	1	0.29485	gene-LOC100527305;gene-DGD2;gene-LOC100816386;gene-LOC100777005;gene-LOC100812490;gene-LOC100819400;gene-LOC100793238;gene-LOC100778769
GO:0003954	NADH dehydrogenase activity	Molecular Function	3	7	1	0.303649	gene-LOC100785124;gene-LOC100795521;gene-LOC100799653
GO:0008276	protein methyltransferase activity	Molecular Function	3	7	1	0.303649	gene-LOC100790739;gene-LOC100798586;gene-LOC100818668
GO:0050508	glucuronosyl-N-acetylglucosaminyl-proteoglycan 4-alpha-N-acetylglucosaminyltransferase activity	Molecular Function	3	7	1	0.303649	gene-LOC100812747;gene-LOC100814029;gene-LOC100788913
GO:0004618	phosphoglycerate kinase activity	Molecular Function	3	7	1	0.303649	gene-LOC100801951;gene-LOC100796458;gene-LOC100802480
GO:0004350	glutamate-5-semialdehyde dehydrogenase activity	Molecular Function	3	7	1	0.303649	gene-LOC100798598;gene-LOC100800143;gene-P5CS
GO:0070300	phosphatidic acid binding	Molecular Function	3	7	1	0.303649	gene-LOC100802570;gene-LOC100793455;gene-LOC100785134
GO:0033925	mannosyl-glycoprotein endo-beta-N-acetylglucosaminidase activity	Molecular Function	3	7	1	0.303649	gene-LOC100806533;gene-LOC100804658;gene-LOC100806475
GO:0004473	malate dehydrogenase (decarboxylating) (NADP+) activity	Molecular Function	3	7	1	0.303649	gene-LOC100791514;gene-LOC100796117;gene-LOC100784112
GO:0004514	nicotinate-nucleotide diphosphorylase (carboxylating) activity	Molecular Function	3	7	1	0.303649	gene-LOC100799223;gene-LOC100794013;gene-LOC100776131
GO:0070905	serine binding	Molecular Function	3	7	1	0.303649	gene-LOC100812952;gene-LOC100816213;gene-LOC100776419
GO:0004349	glutamate 5-kinase activity	Molecular Function	3	7	1	0.303649	gene-LOC100798598;gene-LOC100800143;gene-P5CS
GO:0022841	potassium ion leak channel activity	Molecular Function	3	7	1	0.303649	gene-LOC100777388;gene-LOC100804249;gene-LOC100780438
GO:0046423	allene-oxide cyclase activity	Molecular Function	3	7	1	0.303649	gene-AOC6;gene-AOC3;gene-AOC4
GO:0070181	small ribosomal subunit rRNA binding	Molecular Function	3	7	1	0.303649	gene-LOC100500532;gene-LOC100799648;gene-LOC100778980
GO:0050511	undecaprenyldiphospho-muramoylpentapeptide beta-N-acetylglucosaminyltransferase activity	Molecular Function	3	7	1	0.303649	gene-LOC100809466;gene-MGD1;gene-LOC100797391
GO:0003785	actin monomer binding	Molecular Function	3	7	1	0.303649	gene-LOC100127411;gene-LOC100499717;gene-PRO2
GO:0016618	hydroxypyruvate reductase activity	Molecular Function	3	7	1	0.303649	gene-P42-1;gene-LOC547640;gene-LOC100776772
GO:0008568	microtubule-severing ATPase activity	Molecular Function	3	7	1	0.303649	gene-LOC100813164;gene-LOC100786789;gene-LOC100801219
GO:0004588	orotate phosphoribosyltransferase activity	Molecular Function	3	7	1	0.303649	gene-LOC100807008;gene-LOC100780481;gene-LOC100799111
GO:0004148	dihydrolipoyl dehydrogenase activity	Molecular Function	3	7	1	0.303649	gene-LOC100803176;gene-LOC100782004;gene-LOC100809578
GO:0004843	thiol-dependent ubiquitin-specific protease activity	Molecular Function	25	81	1	0.30655	gene-LOC100776156;gene-LOC100797239;gene-LOC100527755;gene-LOC100802014;gene-LOC100305765;gene-LOC100784991;gene-LOC100812784;gene-LOC100816664;gene-LOC100794067;gene-LOC100792356;gene-LOC100787737;gene-LOC100800636;gene-LOC100527718;gene-LOC100808340;gene-LOC100782778;gene-LOC100803170;gene-LOC100781761;gene-LOC100786678;gene-LOC100816564;gene-LOC100817913;gene-LOC100806936;gene-LOC100814224;gen…
GO:0015035	protein disulfide oxidoreductase activity	Molecular Function	42	140	1	0.309216	gene-LOC100499858;gene-LOC100527081;gene-LOC100798715;gene-LOC100500348;gene-LOC100794983;gene-LOC100305596;gene-LOC100791927;gene-LOC100306506;gene-LOC100781497;gene-LOC100780137;gene-LOC100813627;gene-LOC100527610;gene-LOC100811845;gene-LOC100814030;gene-LOC100782995;gene-LOC100527784;gene-LOC100802893;gene-LOC100305955;gene-LOC100527572;gene-LOC100817095;gene-LOC100802971;gene-LOC100526924;gen…
GO:0008199	ferric iron binding	Molecular Function	7	20	1	0.309577	gene-PAP;gene-LOC547698;gene-LOC100810000;gene-LOC100818610;gene-LOC100816294;gene-SFERH-3;gene-LOC100811801
GO:0008964	phosphoenolpyruvate carboxylase activity	Molecular Function	7	20	1	0.309577	gene-PEPC16;gene-PEPC17;gene-GMPEPC1;gene-LOC100807407;gene-PEPC4;Glycine_max_newGene_5614;gene-GMPEPC7
GO:0008641	small protein activating enzyme activity	Molecular Function	2	4	1	0.309742	gene-LOC100798982;gene-LOC100817492
GO:0008839	4-hydroxy-tetrahydrodipicolinate reductase	Molecular Function	2	4	1	0.309742	gene-LOC100807997;gene-LOC100819889
GO:0003896	DNA primase activity	Molecular Function	2	4	1	0.309742	gene-LOC100780574;gene-LOC100806321
GO:0016742	hydroxymethyl-, formyl- and related transferase activity	Molecular Function	2	4	1	0.309742	gene-LOC100780134;gene-LOC100809779
GO:0008948	oxaloacetate decarboxylase activity	Molecular Function	2	4	1	0.309742	gene-LOC100783612;gene-LOC100500691
GO:0004824	lysine-tRNA ligase activity	Molecular Function	2	4	1	0.309742	gene-LOC100809106;gene-LOC100785660
GO:0047443	4-hydroxy-4-methyl-2-oxoglutarate aldolase activity	Molecular Function	2	4	1	0.309742	gene-LOC100500691;gene-LOC100783612
GO:0052842	inositol diphosphate pentakisphosphate diphosphatase activity	Molecular Function	2	4	1	0.309742	gene-LOC100777839;gene-LOC100811962
GO:0004656	procollagen-proline 4-dioxygenase activity	Molecular Function	2	4	1	0.309742	gene-LOC100819289;gene-LOC100775302
GO:0017049	GTP-Rho binding	Molecular Function	2	4	1	0.309742	gene-LOC100784141;gene-LOC100779844
GO:0004476	mannose-6-phosphate isomerase activity	Molecular Function	2	4	1	0.309742	gene-LOC100805195;gene-LOC100815644
GO:0005483	soluble NSF attachment protein activity	Molecular Function	2	4	1	0.309742	gene-LOC100790986;gene-SNAP18
GO:0016701	oxidoreductase activity, acting on single donors with incorporation of molecular oxygen	Molecular Function	2	4	1	0.309742	gene-LOC100810694;gene-LOC100798236
GO:0010309	acireductone dioxygenase [iron(II)-requiring] activity	Molecular Function	2	4	1	0.309742	gene-LOC100500632;gene-LOC100500592
GO:0047750	cholestenol delta-isomerase activity	Molecular Function	2	4	1	0.309742	gene-LOC100783250;gene-LOC100815125
GO:0098599	palmitoyl hydrolase activity	Molecular Function	2	4	1	0.309742	gene-LOC100818013;gene-LOC100809770
GO:0004038	allantoinase activity	Molecular Function	2	4	1	0.309742	gene-LOC100795029;gene-LOC100809727
GO:0008705	methionine synthase activity	Molecular Function	2	4	1	0.309742	gene-LOC100802039;gene-LOC547643
GO:0004001	adenosine kinase activity	Molecular Function	2	4	1	0.309742	gene-LOC100780391;gene-LOC100801737
GO:0045140	inositol phosphoceramide synthase activity	Molecular Function	2	4	1	0.309742	gene-LOC100818599;gene-LOC100815011
GO:0008120	ceramide glucosyltransferase activity	Molecular Function	2	4	1	0.309742	gene-LOC100783706;gene-LOC100817409
GO:0004140	dephospho-CoA kinase activity	Molecular Function	2	4	1	0.309742	gene-LOC100791096;gene-LOC100782228
GO:0008486	diphosphoinositol-polyphosphate diphosphatase activity	Molecular Function	2	4	1	0.309742	gene-LOC100811962;gene-LOC100777839
GO:0008477	purine nucleosidase activity	Molecular Function	2	4	1	0.309742	gene-LOC100787563;gene-LOC100818908
GO:0004818	glutamate-tRNA ligase activity	Molecular Function	2	4	1	0.309742	gene-LOC100809656;gene-LOC100791298
GO:0008864	formyltetrahydrofolate deformylase activity	Molecular Function	2	4	1	0.309742	gene-LOC100780134;gene-LOC100809779
GO:0047493	ceramide cholinephosphotransferase activity	Molecular Function	2	4	1	0.309742	gene-LOC100818599;gene-LOC100815011
GO:0004814	arginine-tRNA ligase activity	Molecular Function	2	4	1	0.309742	gene-LOC100795626;gene-ARGS
GO:0002151	G-quadruplex RNA binding	Molecular Function	2	4	1	0.309742	gene-LOC100786493;gene-LOC100788061
GO:0008835	diaminohydroxyphosphoribosylaminopyrimidine deaminase activity	Molecular Function	2	4	1	0.309742	gene-LOC100786393;gene-LOC100789675
GO:0009922	fatty acid elongase activity	Molecular Function	2	4	1	0.309742	Glycine_max_newGene_7463;gene-LOC100787513
GO:0004660	protein farnesyltransferase activity	Molecular Function	2	4	1	0.309742	gene-GMERA1B;gene-GMERA1A
GO:0003952	NAD+ synthase (glutamine-hydrolyzing) activity	Molecular Function	2	4	1	0.309742	gene-LOC100777145;gene-LOC100804904
GO:0008428	ribonuclease inhibitor activity	Molecular Function	2	4	1	0.309742	gene-LOC100500691;gene-LOC100783612
GO:0052840	inositol diphosphate tetrakisphosphate diphosphatase activity	Molecular Function	2	4	1	0.309742	gene-LOC100777839;gene-LOC100811962
GO:0016992	lipoate synthase activity	Molecular Function	2	4	1	0.309742	gene-LOC100802588;gene-LOC100789911
GO:0005093	Rab GDP-dissociation inhibitor activity	Molecular Function	2	4	1	0.309742	gene-LOC100810943;gene-LOC100784639
GO:0004033	aldo-keto reductase (NADP) activity	Molecular Function	2	4	1	0.309742	gene-LOC100776273;gene-LOC100809416
GO:0048032	galacturonate binding	Molecular Function	2	4	1	0.309742	gene-LOC100499700;gene-LOC100305501
GO:0035615	clathrin adaptor activity	Molecular Function	2	4	1	0.309742	gene-LOC100815152;gene-LOC100817075
GO:0005366	myo-inositol:proton symporter activity	Molecular Function	2	4	1	0.309742	gene-LOC100785111;gene-LOC100801621
GO:0004516	nicotinate phosphoribosyltransferase activity	Molecular Function	2	4	1	0.309742	gene-LOC100776131;gene-LOC100799223
GO:0004474	malate synthase activity	Molecular Function	2	4	1	0.309742	gene-LOC100782820;gene-LOC100813906
GO:0004615	phosphomannomutase activity	Molecular Function	2	4	1	0.309742	gene-LOC732605;gene-LOC100819768
GO:0035250	UDP-galactosyltransferase activity	Molecular Function	2	4	1	0.309742	gene-LOC100777005;gene-DGD2
GO:0009041	uridylate kinase activity	Molecular Function	2	4	1	0.309742	gene-LOC100777369;gene-LOC100778161
GO:0033188	sphingomyelin synthase activity	Molecular Function	2	4	1	0.309742	gene-LOC100815011;gene-LOC100818599
GO:0004371	glycerone kinase activity	Molecular Function	2	4	1	0.309742	gene-DHBK;gene-LOC100801639
GO:0003865	3-oxo-5-alpha-steroid 4-dehydrogenase activity	Molecular Function	2	4	1	0.309742	gene-LOC100797871;Glycine_max_newGene_4425
GO:0016597	amino acid binding	Molecular Function	10	30	1	0.310104	gene-LOC100802354;gene-LOC100816213;gene-LOC100796780;gene-LOC100794729;gene-LOC100812952;gene-LOC100806283;gene-LOC100776419;gene-LOC100801859;gene-LOC100775828;gene-LOC100787097
GO:0032440	2-alkenal reductase [NAD(P)] activity	Molecular Function	10	30	1	0.310104	gene-LOC100812880;gene-AP1A;gene-LOC100817314;gene-LOC100807407;gene-FBP;gene-LOC100811802;gene-LOC100809668;gene-LOC100788531;Glycine_max_newGene_1710;gene-LOC100783542
GO:0009931	calcium-dependent protein serine/threonine kinase activity	Molecular Function	19	61	1	0.323605	gene-LOC100807672;gene-LOC100800664;gene-LOC100790745;gene-PPCK4;gene-LOC100817321;gene-LOC100798913;gene-LOC100805954;gene-LOC100803631;gene-LOC100790443;gene-LOC100783922;gene-LOC100803313;gene-LOC100794478;gene-PPCK3;Glycine_max_newGene_3979;gene-LOC100808399;gene-LOC100816859;gene-LOC100794177;gene-LOC100788327;gene-LOC100805961
GO:0032555	purine ribonucleotide binding	Molecular Function	9	27	1	0.325514	gene-LOC100306535;gene-LOC100807200;gene-LOC100805150;gene-LOC100780156;gene-GF14A;gene-LOC100527623;gene-LOC100500682;gene-LOC100804158;gene-LOC100775953
GO:0032553	ribonucleotide binding	Molecular Function	9	27	1	0.325514	gene-LOC100804158;gene-LOC100500682;gene-LOC100775953;gene-LOC100527623;gene-GF14A;gene-LOC100780156;gene-LOC100805150;gene-LOC100807200;gene-LOC100306535
GO:0052886	9,9'-dicis-carotene:quinone oxidoreductase activity	Molecular Function	9	27	1	0.325514	gene-LOC100797896;gene-LOC100785435;gene-LOC100777774;gene-LOC100812154;gene-LOC100816078;gene-LOC100804416;gene-LOC100800634;gene-LOC100809309;gene-LOC100813414
GO:0032559	adenyl ribonucleotide binding	Molecular Function	9	27	1	0.325514	gene-LOC100500682;gene-LOC100804158;gene-LOC100775953;gene-LOC100527623;gene-LOC100780156;gene-GF14A;gene-LOC100807200;gene-LOC100805150;gene-LOC100306535
GO:0030554	adenyl nucleotide binding	Molecular Function	9	27	1	0.325514	gene-LOC100500682;gene-LOC100804158;gene-LOC100775953;gene-LOC100527623;gene-LOC100780156;gene-GF14A;gene-LOC100807200;gene-LOC100805150;gene-LOC100306535
GO:0052887	7,9,9'-tricis-neurosporene:quinone oxidoreductase activity	Molecular Function	9	27	1	0.325514	gene-LOC100804416;gene-LOC100800634;gene-LOC100812154;gene-LOC100816078;gene-LOC100813414;gene-LOC100809309;gene-LOC100785435;gene-LOC100797896;gene-LOC100777774
GO:0031491	nucleosome binding	Molecular Function	6	17	1	0.325976	gene-LOC100807878;gene-LOC100819092;gene-LOC100791510;gene-LOC100805034;Glycine_max_newGene_11213;gene-LOC100814442
GO:0008757	S-adenosylmethionine-dependent methyltransferase activity	Molecular Function	22	72	1	0.342051	gene-LOC100808134;gene-GMIMT1;gene-LOC100806525;gene-SABATH2;gene-LOC100777636;gene-LOC100781008;gene-LOC100818947;gene-LOC100789402;gene-LOC100790739;gene-LOC100779260;gene-LOC100811247;gene-LOC100784957;gene-OMT5;gene-LOC100778824;gene-LOC100819853;gene-LOC100780100;gene-LOC100800801;Glycine_max_newGene_5644;gene-LOC100527804;gene-LOC100803633;gene-LOC100799303;gene-LOC100798347
GO:0016717	oxidoreductase activity, acting on paired donors, with oxidation of a pair of donors resulting in the reduction of molecular oxygen to two molecules of water	Molecular Function	5	14	1	0.344548	gene-FAD3-2b;gene-FAD8-1;gene-FAD8.2;gene-GMFAD2-2B;gene-FAD5.2
GO:0033926	glycopeptide alpha-N-acetylgalactosaminidase activity	Molecular Function	5	14	1	0.344548	gene-LOC100803655;gene-LOC100783794;gene-LOC100781129;gene-LOC100797025;gene-LOC100788719
GO:0005452	inorganic anion exchanger activity	Molecular Function	5	14	1	0.344548	gene-LOC100793554;Glycine_max_newGene_7737;Glycine_max_newGene_6586;gene-LOC100795777;gene-LOC100805633
GO:0005262	calcium channel activity	Molecular Function	5	14	1	0.344548	gene-LOC100782593;gene-LOC100809427;gene-LOC100814253;gene-LOC100779498;gene-LOC100499752
GO:0004373	glycogen (starch) synthase activity	Molecular Function	5	14	1	0.344548	gene-LOC100301883;gene-LOC100804775;gene-LOC100807354;gene-LOC100788308;gene-LOC100797872
GO:0052689	carboxylic ester hydrolase activity	Molecular Function	17	55	1	0.350739	gene-LOC100781246;gene-LOC100799815;gene-LOC100819978;gene-LOC100812296;gene-LOC100818152;gene-LOC100786972;gene-LOC100810031;gene-LOC100808362;gene-LOC100810716;gene-LOC100791571;gene-LOC100793403;gene-LOC100792819;gene-LOC100786786;gene-LOC100794453;gene-LOC100816190;gene-LOC100785270;gene-LOC100799285
GO:0004575	sucrose alpha-glucosidase activity	Molecular Function	7	21	1	0.361617	gene-LOC100797025;gene-LOC100803655;gene-LOC100783794;gene-LOC100781129;gene-LOC100788719;gene-LOC100788844;gene-LOC100799487
GO:0016614	oxidoreductase activity, acting on CH-OH group of donors	Molecular Function	7	21	1	0.361617	gene-LOC100784433;gene-LOC100809416;gene-LOC100780028;gene-LOC100779461;gene-LOC100796752;gene-LOC100777124;gene-LOC100776273
GO:0046527	glucosyltransferase activity	Molecular Function	7	21	1	0.361617	gene-LOC100801607;gene-LOC106799011;gene-LOC100787540;gene-LOC100777209;gene-LOC100780527;gene-LOC100811473;gene-LOC100809371
GO:0015093	ferrous iron transmembrane transporter activity	Molecular Function	4	11	1	0.366114	gene-LOC100805118;gene-LOC100803531;gene-LOC100797536;gene-LOC100776339
GO:0004623	phospholipase A2 activity	Molecular Function	4	11	1	0.366114	gene-LOC100808362;gene-LOC100797904;gene-LOC100527124;gene-LOC100778686
GO:0004801	sedoheptulose-7-phosphate:D-glyceraldehyde-3-phosphate glyceronetransferase activity	Molecular Function	4	11	1	0.366114	gene-LOC100807267;gene-LOC100789900;gene-LOC100816075;gene-LOC100800377
GO:0015341	zinc efflux active transmembrane transporter activity	Molecular Function	4	11	1	0.366114	gene-LOC100805118;gene-LOC100776339;gene-LOC100797536;gene-LOC100803531
GO:0043168	anion binding	Molecular Function	34	115	1	0.369738	gene-GF14A;gene-LOC100805150;gene-LOC100793455;gene-LOC100807200;gene-LOC100306535;gene-LOC100779624;gene-LOC100803851;gene-LOC100794899;gene-LOC100799499;gene-LOC100775953;gene-LOC100777506;gene-LOC100806283;gene-LOC100527623;gene-LOC100499880;gene-LOC100499700;gene-LOC100798958;gene-LOC100817169;gene-LOC100500682;gene-LOC100796250;gene-LOC100801859;gene-LOC100306214;gene-LOC100780156;gene-LOC10…
GO:0003729	mRNA binding	Molecular Function	92	321	1	0.385366	gene-LOC100805494;gene-LOC100808237;gene-LOC100812433;gene-LOC100777433;gene-LOC100799012;gene-LOC100778904;gene-LOC100809906;gene-LOC100817463;gene-LOC100792928;gene-LOC100786894;gene-LOC100527516;gene-LOC100804167;gene-LOC102668793;gene-LOC100816420;gene-LOC100795821;gene-LOC100801829;gene-LOC100798476;gene-LOC100797340;gene-LOC100776550;Glycine_max_newGene_3797;gene-LOC100798230;gene-LOC100820…
GO:0016831	carboxy-lyase activity	Molecular Function	8	25	1	0.391174	gene-LOC100794743;gene-LOC100785163;gene-LOC100799111;gene-LOC100817481;gene-LOC100795577;gene-LOC100789053;gene-LOC100787315;gene-LOC100809553
GO:0004467	long-chain fatty acid-CoA ligase activity	Molecular Function	8	25	1	0.391174	gene-LOC100811418;gene-LOC100803677;gene-LOC100778889;gene-LOC100779735;gene-LOC100816780;gene-LOC100787691;gene-LOC100790068;gene-LOC100806645
GO:0004609	phosphatidylserine decarboxylase activity	Molecular Function	3	8	1	0.392179	gene-LOC100811372;Glycine_max_newGene_6427;gene-LOC100794517
GO:0004749	ribose phosphate diphosphokinase activity	Molecular Function	3	8	1	0.392179	gene-LOC100812868;gene-LOC100799836;gene-LOC100794730
GO:0030267	glyoxylate reductase (NADP) activity	Molecular Function	3	8	1	0.392179	gene-LOC100776772;gene-LOC547640;gene-P42-1
GO:0015020	glucuronosyltransferase activity	Molecular Function	3	8	1	0.392179	gene-LOC100795248;gene-LOC100787339;gene-LOC100783884
GO:0003841	1-acylglycerol-3-phosphate O-acyltransferase activity	Molecular Function	3	8	1	0.392179	gene-LOC100792858;gene-LOC100812696;gene-LOC100776240
GO:0004477	methenyltetrahydrofolate cyclohydrolase activity	Molecular Function	3	8	1	0.392179	gene-LOC100819231;gene-LOC100792682;gene-LOC100797215
GO:0051119	sugar transmembrane transporter activity	Molecular Function	10	32	1	0.395267	gene-GMSWEET33;gene-GMSWEET37;gene-GMSWEET13;gene-GMSWEET7;gene-GMSWEET40;gene-GMSWEET5;gene-GMSWEET22;gene-GMSWEET15;gene-GMSWEET8;gene-GMSWEET21
GO:0036459	thiol-dependent ubiquitinyl hydrolase activity	Molecular Function	12	39	1	0.397445	gene-LOC100337655;gene-LOC100804947;gene-LOC100785217;gene-LOC100819341;gene-LOC100776553;gene-LOC100778338;gene-LOC100780952;gene-LOC100817733;gene-LOC100337654;gene-LOC100793079;gene-LOC100792187;gene-LOC100811058
GO:0016853	isomerase activity	Molecular Function	12	39	1	0.397445	gene-LOC100799192;gene-LOC100305460;gene-LOC100780474;gene-LOC100814374;Glycine_max_newGene_4881;gene-LOC100499960;gene-LOC100805755;gene-LOC100801219;gene-LOC100813728;gene-LOC100787756;gene-LOC100813627;gene-LOC100499858
GO:0004364	glutathione transferase activity	Molecular Function	22	74	1	0.397872	gene-GSTU17;gene-GSTU41;gene-LOC100775421;gene-GSTU4;gene-LOC547576;gene-LOC100813447;gene-LOC100306119;gene-LOC547583;gene-LOC100305870;gene-LOC100806714;gene-GSTF13;gene-GSTU60;Glycine_max_newGene_1604;gene-GST3;gene-GSTU28;gene-GSTU1;gene-LOC547581;gene-LOC100819783;gene-LOC548029;gene-GSTU9;gene-LOC100796611;gene-GSTF7
GO:0004124	cysteine synthase activity	Molecular Function	5	15	1	0.40854	gene-LOC100806420;gene-LOC100804065;gene-LOC100775420;gene-LOC100815330;gene-LOC547631
GO:0003727	single-stranded RNA binding	Molecular Function	5	15	1	0.40854	gene-LOC100804872;gene-LOC100815140;gene-LOC100801939;gene-GMGLYII-12;gene-LOC100819232
GO:0016174	NAD(P)H oxidase activity	Molecular Function	5	15	1	0.40854	gene-LOC100808271;gene-LOC100814238;gene-LOC100775988;gene-LOC100812342;gene-LOC100798603
GO:0032452	histone demethylase activity	Molecular Function	5	15	1	0.40854	gene-LOC100775813;gene-LOC100306287;gene-LOC100798611;gene-LOC100810972;gene-LOC100775271
GO:0032182	ubiquitin-like protein binding	Molecular Function	5	15	1	0.40854	gene-LOC100789588;gene-LOC100527072;gene-LOC100527665;gene-LOC100795465;gene-LOC100780721
GO:0005351	sugar:proton symporter activity	Molecular Function	19	64	1	0.413977	gene-LOC100815073;gene-LOC100816478;gene-LOC100800461;gene-LOC100817648;gene-LOC100812224;gene-LOC100809316;gene-LOC100793265;Glycine_max_newGene_9047;gene-LOC100783916;gene-LOC100812244;gene-MST1;gene-LOC100811857;gene-LOC100801060;gene-LOC100791976;gene-LOC100793493;gene-LOC100802411;gene-LOC100801856;gene-LOC100784959;gene-LOC100818304
GO:0008375	acetylglucosaminyltransferase activity	Molecular Function	7	22	1	0.414221	gene-LOC100785910;gene-LOC100818244;gene-LOC100790149;gene-LOC100776378;gene-LOC100789583;gene-LOC100779943;gene-LOC100795005
GO:0016667	oxidoreductase activity, acting on a sulfur group of donors	Molecular Function	7	22	1	0.414221	gene-LOC100499858;gene-LOC100813627;gene-LOC100784029;gene-LOC100305959;gene-LOC100814030;gene-LOC100527081;gene-LOC100527038
GO:0016798	hydrolase activity, acting on glycosyl bonds	Molecular Function	9	29	1	0.416405	gene-LOC100782283;gene-LOC100819042;gene-LOC100795266;gene-LOC100791916;gene-LOC100787563;gene-LOC100810796;gene-LOC100818908;gene-LOC100784482;gene-LOC100797001
GO:0008138	protein tyrosine/serine/threonine phosphatase activity	Molecular Function	11	36	1	0.41702	gene-LOC100804705;gene-LOC100801622;gene-LOC100817410;gene-LOC102661225;gene-LOC100814503;gene-LOC100786287;gene-LOC100803597;gene-LOC100306342;gene-LOC100791993;gene-LOC100806191;gene-LOC100786889
GO:0008324	cation transmembrane transporter activity	Molecular Function	11	36	1	0.41702	gene-LOC100783643;gene-LOC100776339;gene-LOC100797536;gene-LOC100775437;gene-LOC100819204;gene-LOC100791229;gene-LOC100801583;gene-LOC100805118;gene-LOC100785952;gene-LOC100803531;gene-LOC100809496
GO:0030570	pectate lyase activity	Molecular Function	11	36	1	0.41702	gene-LOC100808253;gene-LOC100802068;gene-LOC100781845;gene-LOC100816256;gene-LOC100789303;gene-LOC100809277;gene-LOC100794814;gene-LOC100808438;gene-LOC100779940;gene-LOC100101868;gene-LOC100814679
GO:0050660	flavin adenine dinucleotide binding	Molecular Function	39	135	1	0.420652	gene-LOC100783371;gene-LOC100798203;gene-LOC100808856;Glycine_max_newGene_7827;gene-ACX1_1;gene-LOC100500084;gene-LOC100796752;gene-LOC100813439;gene-LOC100815931;gene-LOC100780028;gene-LOC100795136;gene-LOC100819919;gene-LOC100809578;gene-LOC100775376;gene-LOC100820031;gene-LOC100782004;gene-LOC100817010;gene-LOC100803020;gene-LOC100810846;gene-LOC100793203;gene-LOC100784433;gene-LOC100812619;ge…
GO:0005347	ATP transmembrane transporter activity	Molecular Function	24	82	1	0.424174	gene-LOC100800051;gene-LOC100802640;gene-LOC100789942;gene-LOC100777048;gene-LOC100816376;gene-LOC100775558;gene-LOC100790672;gene-LOC100787927;gene-LOC100810035;gene-LOC100812227;gene-LOC100808194;gene-LOC100816412;gene-LOC100814032;gene-LOC100799825;gene-LOC100790192;gene-LOC100819556;gene-LOC100782750;gene-LOC100777341;gene-LOC100816623;gene-LOC100818408;gene-LOC100809410;gene-LOC100783588;gen…
GO:0004070	aspartate carbamoyltransferase activity	Molecular Function	2	5	1	0.426099	gene-LOC100802354;gene-LOC100787097
GO:0004181	metallocarboxypeptidase activity	Molecular Function	2	5	1	0.426099	gene-LOC100805425;gene-LOC100813842
GO:0005345	purine nucleobase transmembrane transporter activity	Molecular Function	2	5	1	0.426099	gene-LOC100778491;gene-LOC100787924
GO:0000107	imidazoleglycerol-phosphate synthase activity	Molecular Function	2	5	1	0.426099	gene-LOC100815533;gene-LOC100500353
GO:0004816	asparagine-tRNA ligase activity	Molecular Function	2	5	1	0.426099	gene-LOC100804064;gene-LOC100790605
GO:0060590	ATPase regulator activity	Molecular Function	2	5	1	0.426099	gene-LOC100800435;gene-LOC100790770
GO:0004528	phosphodiesterase I activity	Molecular Function	2	5	1	0.426099	gene-LOC100793881;gene-LOC100817167
GO:0008531	riboflavin kinase activity	Molecular Function	2	5	1	0.426099	gene-LOC100801888;gene-LOC100786021
GO:0008124	4-alpha-hydroxytetrahydrobiopterin dehydratase activity	Molecular Function	2	5	1	0.426099	gene-LOC100813755;gene-LOC100810992
GO:0033819	lipoyl(octanoyl) transferase activity	Molecular Function	2	5	1	0.426099	gene-LOC100797208;gene-LOC100818934
GO:0070336	flap-structured DNA binding	Molecular Function	2	5	1	0.426099	gene-LOC100797086;gene-LOC100793881
GO:0046975	histone methyltransferase activity (H3-K36 specific)	Molecular Function	2	5	1	0.426099	gene-LOC100794521;gene-LOC100778307
GO:0003849	3-deoxy-7-phosphoheptulonate synthase activity	Molecular Function	2	5	1	0.426099	Glycine_max_newGene_6233;gene-LOC100797019
GO:0000254	C-4 methylsterol oxidase activity	Molecular Function	2	5	1	0.426099	gene-LOC100793785;gene-LOC100790183
GO:0004335	galactokinase activity	Molecular Function	2	5	1	0.426099	gene-LOC100795881;gene-LOC100796793
GO:0033743	peptide-methionine (R)-S-oxide reductase activity	Molecular Function	2	5	1	0.426099	gene-LOC100305558;gene-LOC100784622
GO:0000340	RNA 7-methylguanosine cap binding	Molecular Function	2	5	1	0.426099	gene-LOC100499799;gene-LOC100814483
GO:0004331	fructose-2,6-bisphosphate 2-phosphatase activity	Molecular Function	2	5	1	0.426099	gene-LOC100796785;gene-LOC100798990
GO:0043139	5'-3' DNA helicase activity	Molecular Function	2	5	1	0.426099	gene-LOC100809596;gene-LOC100799329
GO:0004657	proline dehydrogenase activity	Molecular Function	2	5	1	0.426099	gene-LOC100797464;gene-LOC100800978
GO:0016920	pyroglutamyl-peptidase activity	Molecular Function	2	5	1	0.426099	gene-LOC100305735;gene-LOC100789152
GO:0003942	N-acetyl-gamma-glutamyl-phosphate reductase activity	Molecular Function	2	5	1	0.426099	gene-LOC100788347;gene-LOC100801527
GO:0016780	phosphotransferase activity, for other substituted phosphate groups	Molecular Function	2	5	1	0.426099	gene-LOC100779345;gene-LOC100782910
GO:0016833	oxo-acid-lyase activity	Molecular Function	2	5	1	0.426099	gene-LOC100815533;gene-LOC100500353
GO:0004614	phosphoglucomutase activity	Molecular Function	2	5	1	0.426099	gene-LOC100778321;gene-LOC100780166
GO:0004799	thymidylate synthase activity	Molecular Function	2	5	1	0.426099	gene-LOC100786329;gene-DHFR-TS
GO:0050833	pyruvate transmembrane transporter activity	Molecular Function	2	5	1	0.426099	gene-LOC100785165;gene-LOC100798344
GO:0050302	indole-3-acetaldehyde oxidase activity	Molecular Function	2	5	1	0.426099	gene-LOC100783522;gene-LOC100792133
GO:0008240	tripeptidyl-peptidase activity	Molecular Function	2	5	1	0.426099	gene-LOC100787184;gene-LOC106794597
GO:0008420	CTD phosphatase activity	Molecular Function	4	12	1	0.438899	gene-LOC100800381;gene-LOC100816525;gene-LOC100798750;gene-LOC100790196
GO:0008239	dipeptidyl-peptidase activity	Molecular Function	4	12	1	0.438899	gene-LOC100804985;gene-LOC100781698;gene-LOC100806381;gene-LOC100803257
GO:0001664	G-protein coupled receptor binding	Molecular Function	4	12	1	0.438899	gene-GPA1;gene-GPA2;gene-LOC100781223;gene-LOC100794534
GO:0008661	1-deoxy-D-xylulose-5-phosphate synthase activity	Molecular Function	4	12	1	0.438899	gene-LOC100789279;gene-LOC100776569;gene-LOC100799983;gene-LOC100805786
GO:0070180	large ribosomal subunit rRNA binding	Molecular Function	6	19	1	0.440618	gene-LOC100811636;gene-LOC100306699;gene-LOC100794110;gene-LOC100811654;gene-LOC100786299;gene-LOC100777482
GO:0050897	cobalt ion binding	Molecular Function	6	19	1	0.440618	gene-LOC100816213;gene-LOC100812952;gene-LOC100776419;gene-LOC100795029;gene-LOC100799344;gene-LOC100809727
GO:0005544	calcium-dependent phospholipid binding	Molecular Function	11	37	1	0.457932	gene-ANN11;gene-LOC100815639;gene-LOC100794685;gene-LOC100782110;gene-LOC100796047;gene-LOC100784424;gene-LOC100784954;gene-LOC100820062;gene-LOC100794511;gene-LOC100807801;gene-LOC100796092
GO:0004721	phosphoprotein phosphatase activity	Molecular Function	20	69	1	0.458109	gene-LOC100786396;Glycine_max_newGene_10967;gene-LOC100803420;gene-LOC100820006;gene-LOC100775812;gene-LOC100811413;gene-LOC100798408;gene-LOC100785804;gene-LOC100806191;gene-LOC100781992;gene-LOC100807329;gene-LOC100807069;gene-LOC100799821;gene-LOC100306388;gene-LOC100782279;gene-LOC100816262;gene-LOC100803155;gene-LOC100803112;gene-LOC100783950;gene-LOC100808597
GO:0016538	cyclin-dependent protein serine/threonine kinase regulator activity	Molecular Function	20	69	1	0.458109	gene-LOC100798068;gene-LOC547739;gene-LOC100786340;gene-LOC100812660;gene-LOC547737;gene-LOC100807175;gene-LOC100808850;gene-LOC100779889;gene-LOC100792867;gene-LOC100801274;gene-CYCA1_1;gene-LOC100778578;gene-LOC100819848;gene-LOC547740;gene-LOC100794010;gene-LOC100782569;gene-LOC100789565;gene-LOC100812029;gene-LOC100782957;gene-CYCB1_1
GO:0044877	macromolecular complex binding	Molecular Function	9	30	1	0.461963	gene-LOC100816446;gene-LOC100814445;gene-LOC100813969;gene-LOC100815227;gene-LOC100806443;gene-LOC100811988;gene-LOC100789980;gene-LOC100816558;gene-LOC100500536
GO:0015301	anion:anion antiporter activity	Molecular Function	9	30	1	0.461963	gene-LOC100804670;gene-LOC100777637;gene-LOC100780331;gene-LOC100787284;gene-LOC100794754;gene-LOC100776591;gene-LOC100812617;gene-LOC100815251;gene-LOC100775789
GO:0004322	ferroxidase activity	Molecular Function	21	73	1	0.470859	gene-LOC100797749;gene-SFERH-3;gene-LOC547698;gene-LOC100775325;gene-LOC100797670;gene-LOC100775285;gene-LOC100819758;gene-LOC100810993;gene-LOC100814128;gene-LOC100782355;gene-LOC100779825;gene-LOC100811801;gene-LOC100810000;gene-LOC547704;gene-LOC100811543;gene-LOC100776222;gene-LOC100796779;gene-LOC100811534;gene-LOC100777925;gene-LOC100808948;gene-LOC100792688
GO:0008131	primary amine oxidase activity	Molecular Function	5	16	1	0.471545	gene-PAO1;gene-LOC100819571;gene-LOC100817473;gene-LOC100798722;gene-LOC100778802
GO:0051753	mannan synthase activity	Molecular Function	5	16	1	0.471545	gene-LOC100782772;gene-LOC100802752;gene-LOC100813900;gene-LOC100791645;gene-LOC100786644
GO:0008889	glycerophosphodiester phosphodiesterase activity	Molecular Function	5	16	1	0.471545	gene-LOC100792750;gene-LOC100800181;gene-LOC100811399;gene-LOC100815471;gene-LOC100778145
GO:0016810	hydrolase activity, acting on carbon-nitrogen (but not peptide) bonds	Molecular Function	5	16	1	0.471545	gene-LOC100794435;gene-LOC100781615;gene-LOC100500128;gene-LOC100781644;gene-LOC100780821
GO:0042802	identical protein binding	Molecular Function	19	66	1	0.475242	gene-LOC100785547;gene-LOC100305714;gene-LOC100813245;gene-LOC100799111;gene-LOC100814445;Glycine_max_newGene_11088;gene-LOC100819563;gene-LOC100815140;gene-LOC100805857;gene-LOC100781893;gene-LOC100809369;gene-LOC100799188;gene-LOC100787821;gene-LOC100813103;gene-LOC100809510;gene-LOC100793455;gene-LOC100819331;gene-LOC100499736;gene-LOC100788594
GO:0005384	manganese ion transmembrane transporter activity	Molecular Function	12	41	1	0.475476	gene-LOC100814227;gene-LOC100785207;gene-GMNRAMP1B;gene-GMNRAMP1A;gene-GMNRAMP2A;gene-LOC100793585;gene-LOC100800852;gene-LOC100786634;gene-LOC100802179;gene-LOC100788580;gene-DMT1;gene-GMNRAMP3A
GO:0017176	phosphatidylinositol N-acetylglucosaminyltransferase activity	Molecular Function	3	9	1	0.477406	gene-LOC100793957;gene-LOC100795421;gene-LOC100805383
GO:0016151	nickel cation binding	Molecular Function	3	9	1	0.477406	gene-LOC547706;gene-URE;gene-LOC100797024
GO:0032041	NAD-dependent histone deacetylase activity (H3-K14 specific)	Molecular Function	3	9	1	0.477406	gene-LOC100804681;gene-LOC100779296;gene-LOC100786705
GO:0004652	polynucleotide adenylyltransferase activity	Molecular Function	3	9	1	0.477406	gene-LOC100816915;Glycine_max_newGene_5029;gene-LOC100815801
GO:0009378	four-way junction helicase activity	Molecular Function	3	9	1	0.477406	gene-LOC100797777;gene-LOC100793222;gene-LOC100817635
GO:0016868	intramolecular transferase activity, phosphotransferases	Molecular Function	3	9	1	0.477406	gene-LOC100775510;gene-LOC100801023;gene-PGM
GO:0042500	aspartic endopeptidase activity, intramembrane cleaving	Molecular Function	3	9	1	0.477406	gene-LOC100801697;gene-LOC100782203;gene-LOC100776679
GO:0004566	beta-glucuronidase activity	Molecular Function	3	9	1	0.477406	gene-LOC100802477;gene-LOC100792087;gene-LOC100778008
GO:0003857	3-hydroxyacyl-CoA dehydrogenase activity	Molecular Function	3	9	1	0.477406	gene-LOC100798079;gene-LOC100170753;gene-LOC100813542
GO:0016628	oxidoreductase activity, acting on the CH-CH group of donors, NAD or NADP as acceptor	Molecular Function	3	9	1	0.477406	gene-LOC100814521;gene-LOC100779933;gene-LOC100814603
GO:0030619	U1 snRNA binding	Molecular Function	3	9	1	0.477406	gene-LOC100795821;gene-LOC100777062;gene-LOC100806980
GO:0003997	acyl-CoA oxidase activity	Molecular Function	3	9	1	0.477406	gene-LOC100810829;Glycine_max_newGene_7827;gene-ACX1_1
GO:0004014	adenosylmethionine decarboxylase activity	Molecular Function	3	9	1	0.477406	gene-LOC100785366;gene-LOC100799463;gene-SAMDC
GO:0016744	transferase activity, transferring aldehyde or ketonic groups	Molecular Function	3	9	1	0.477406	gene-LOC100789279;gene-LOC100776569;gene-LOC100799983
GO:0016763	transferase activity, transferring pentosyl groups	Molecular Function	3	9	1	0.477406	gene-SC-04;gene-LOC100788953;gene-LOC100799111
GO:0003968	RNA-directed 5'-3' RNA polymerase activity	Molecular Function	3	9	1	0.477406	gene-LOC100807347;gene-LOC100811587;gene-LOC100795178
GO:0004034	aldose 1-epimerase activity	Molecular Function	3	9	1	0.477406	gene-LOC100798975;gene-LOC100809972;gene-LOC100781853
GO:0035598	N6-threonylcarbomyladenosine methylthiotransferase activity	Molecular Function	1	2	1	0.478725	gene-LOC100798865
GO:0043864	indoleacetamide hydrolase activity	Molecular Function	1	2	1	0.478725	gene-LOC100780821
GO:0120013	intermembrane lipid transfer activity	Molecular Function	1	2	1	0.478725	gene-LOC100500008
GO:0097493	structural molecule activity conferring elasticity	Molecular Function	1	2	1	0.478725	gene-LOC100814445
GO:0033971	hydroxyisourate hydrolase activity	Molecular Function	1	2	1	0.478725	gene-LOC100805930
GO:0004075	biotin carboxylase activity	Molecular Function	1	2	1	0.478725	gene-ACCC-3
GO:0050377	UDP-glucose 4,6-dehydratase activity	Molecular Function	1	2	1	0.478725	Glycine_max_newGene_2371
GO:0047304	2-aminoethylphosphonate-pyruvate transaminase activity	Molecular Function	1	2	1	0.478725	gene-SGT2
GO:0003863	3-methyl-2-oxobutanoate dehydrogenase (2-methylpropanoyl-transferring) activity	Molecular Function	1	2	1	0.478725	gene-LOC100802853
GO:0052650	NADP-retinol dehydrogenase activity	Molecular Function	1	2	1	0.478725	gene-LOC100776273
GO:0001872	(1->3)-beta-D-glucan binding	Molecular Function	1	2	1	0.478725	gene-LOC100797001
GO:0019172	glyoxalase III activity	Molecular Function	1	2	1	0.478725	gene-LOC100791599
GO:0051371	muscle alpha-actinin binding	Molecular Function	1	2	1	0.478725	gene-LOC100814445
GO:0030506	ankyrin binding	Molecular Function	1	2	1	0.478725	gene-LOC100814445
GO:0008676	3-deoxy-8-phosphooctulonate synthase activity	Molecular Function	1	2	1	0.478725	gene-LOC100809120
GO:0031433	telethonin binding	Molecular Function	1	2	1	0.478725	gene-LOC100814445
GO:0004639	phosphoribosylaminoimidazolesuccinocarboxamide synthase activity	Molecular Function	1	2	1	0.478725	gene-LOC100801209
GO:0005355	glucose transmembrane transporter activity	Molecular Function	1	2	1	0.478725	gene-LOC100801856
GO:0004815	aspartate-tRNA ligase activity	Molecular Function	1	2	1	0.478725	gene-LOC100811577
GO:0000906	6,7-dimethyl-8-ribityllumazine synthase activity	Molecular Function	1	2	1	0.478725	gene-LOC100818483
GO:0051724	NAD transporter activity	Molecular Function	1	2	1	0.478725	gene-LOC100816376
GO:0004631	phosphomevalonate kinase activity	Molecular Function	1	2	1	0.478725	gene-LOC100810373
GO:0047884	FAD diphosphatase activity	Molecular Function	1	2	1	0.478725	gene-LOC100777180
GO:0004643	phosphoribosylaminoimidazolecarboxamide formyltransferase activity	Molecular Function	1	2	1	0.478725	gene-LOC100780790
GO:0004671	protein C-terminal S-isoprenylcysteine carboxyl O-methyltransferase activity	Molecular Function	1	2	1	0.478725	gene-LOC100784645
GO:0004107	chorismate synthase activity	Molecular Function	1	2	1	0.478725	gene-LOC732570
GO:0008311	double-stranded DNA 3'-5' exodeoxyribonuclease activity	Molecular Function	1	2	1	0.478725	gene-LOC100817167
GO:0047751	cholestenone 5-alpha-reductase activity	Molecular Function	1	2	1	0.478725	gene-LOC100797871
GO:0030144	alpha-1,6-mannosylglycoprotein 6-beta-N-acetylglucosaminyltransferase activity	Molecular Function	1	2	1	0.478725	gene-LOC100782588
GO:0001003	RNA polymerase III type 2 promoter sequence-specific DNA binding	Molecular Function	1	2	1	0.478725	gene-LOC100793357
GO:0004536	deoxyribonuclease activity	Molecular Function	1	2	1	0.478725	gene-LOC100815140
GO:0008966	phosphoglucosamine mutase activity	Molecular Function	1	2	1	0.478725	gene-LOC100802789
GO:0046554	malate dehydrogenase (NADP+) activity	Molecular Function	1	2	1	0.478725	gene-LOC100782567
GO:0033699	DNA 5'-adenosine monophosphate hydrolase activity	Molecular Function	1	2	1	0.478725	gene-LOC100786762
GO:0017005	3'-tyrosyl-DNA phosphodiesterase activity	Molecular Function	1	2	1	0.478725	gene-LOC100793746
GO:0004845	uracil phosphoribosyltransferase activity	Molecular Function	1	2	1	0.478725	gene-LOC100797537
GO:0052925	dol-P-Man:Man(5)GlcNAc(2)-PP-Dol alpha-1,3-mannosyltransferase activity	Molecular Function	1	2	1	0.478725	gene-LOC100793743
GO:0050529	polyneuridine-aldehyde esterase activity	Molecular Function	1	2	1	0.478725	gene-LOC100796281
GO:0008117	sphinganine-1-phosphate aldolase activity	Molecular Function	1	2	1	0.478725	gene-LOC100794743
GO:0004970	ionotropic glutamate receptor activity	Molecular Function	1	2	1	0.478725	Glycine_max_newGene_24
GO:1990538	xylan O-acetyltransferase activity	Molecular Function	1	2	1	0.478725	gene-LOC100789791
GO:0004852	uroporphyrinogen-III synthase activity	Molecular Function	1	2	1	0.478725	gene-LOC100808086
GO:0004015	adenosylmethionine-8-amino-7-oxononanoate transaminase activity	Molecular Function	1	2	1	0.478725	gene-LOC100792355
GO:0048244	phytanoyl-CoA dioxygenase activity	Molecular Function	1	2	1	0.478725	gene-LOC100790934
GO:0052658	inositol-1,4,5-trisphosphate 5-phosphatase activity	Molecular Function	1	2	1	0.478725	gene-LOC100784981
GO:0042286	glutamate-1-semialdehyde 2,1-aminomutase activity	Molecular Function	1	2	1	0.478725	gene-GSA1
GO:0008455	alpha-1,6-mannosylglycoprotein 2-beta-N-acetylglucosaminyltransferase activity	Molecular Function	1	2	1	0.478725	Glycine_max_newGene_9819
GO:2001071	maltoheptaose binding	Molecular Function	1	2	1	0.478725	gene-LOC100792611
GO:0003937	IMP cyclohydrolase activity	Molecular Function	1	2	1	0.478725	gene-LOC100780790
GO:0004059	aralkylamine N-acetyltransferase activity	Molecular Function	1	2	1	0.478725	gene-LOC100778613
GO:0052928	CTP:3'-cytidine-tRNA cytidylyltransferase activity	Molecular Function	1	2	1	0.478725	gene-LOC100527248
GO:0004395	hexaprenyldihydroxybenzoate methyltransferase activity	Molecular Function	1	2	1	0.478725	gene-LOC100783802
GO:0008469	histone-arginine N-methyltransferase activity	Molecular Function	1	2	1	0.478725	gene-LOC100782245
GO:0070678	preprotein binding	Molecular Function	1	2	1	0.478725	gene-HOP1
GO:0008307	structural constituent of muscle	Molecular Function	1	2	1	0.478725	gene-LOC100814445
GO:0017050	D-erythro-sphingosine kinase activity	Molecular Function	1	2	1	0.478725	gene-LOC100805656
GO:0034039	8-oxo-7,8-dihydroguanine DNA N-glycosylase activity	Molecular Function	1	2	1	0.478725	gene-LOC100781827
GO:0042800	histone methyltransferase activity (H3-K4 specific)	Molecular Function	1	2	1	0.478725	gene-LOC100812602
GO:0033729	anthocyanidin reductase activity	Molecular Function	1	2	1	0.478725	gene-ANR1
GO:0004735	pyrroline-5-carboxylate reductase activity	Molecular Function	1	2	1	0.478725	gene-LOC100784362
GO:0032184	SUMO polymer binding	Molecular Function	1	2	1	0.478725	gene-LOC100527665
GO:0010313	phytochrome binding	Molecular Function	1	2	1	0.478725	gene-LOC100818162
GO:0009976	tocopherol cyclase activity	Molecular Function	1	2	1	0.478725	gene-LOC100791679
GO:1905538	polysome binding	Molecular Function	1	2	1	0.478725	gene-LOC100820330
GO:0004121	cystathionine beta-lyase activity	Molecular Function	1	2	1	0.478725	gene-LOC100812354
GO:0046608	carotenoid isomerase activity	Molecular Function	1	2	1	0.478725	gene-LOC100811616
GO:0004164	diphthine synthase activity	Molecular Function	1	2	1	0.478725	gene-LOC100784092
GO:0000406	double-strand/single-strand DNA junction binding	Molecular Function	1	2	1	0.478725	gene-LOC100797086
GO:0004846	urate oxidase activity	Molecular Function	1	2	1	0.478725	gene-UR2
GO:0019140	inositol 3-kinase activity	Molecular Function	1	2	1	0.478725	gene-LOC100802869
GO:0050072	m7G(5')pppN diphosphatase activity	Molecular Function	1	2	1	0.478725	gene-LOC100807659
GO:0016653	oxidoreductase activity, acting on NAD(P)H, heme protein as acceptor	Molecular Function	1	2	1	0.478725	gene-LOC100784443
GO:0030696	tRNA (m5U54) methyltransferase activity	Molecular Function	1	2	1	0.478725	gene-LOC100777466
GO:0050307	sucrose-phosphate phosphatase activity	Molecular Function	1	2	1	0.478725	gene-LOC100800397
GO:0004644	phosphoribosylglycinamide formyltransferase activity	Molecular Function	1	2	1	0.478725	gene-PUR3
GO:0034618	arginine binding	Molecular Function	1	2	1	0.478725	gene-LOC100814183
GO:0015039	NADPH-adrenodoxin reductase activity	Molecular Function	1	2	1	0.478725	gene-LOC100777997
GO:0016630	protochlorophyllide reductase activity	Molecular Function	1	2	1	0.478725	gene-LOC100785637
GO:0008478	pyridoxal kinase activity	Molecular Function	1	2	1	0.478725	gene-LOC100811288
GO:0047293	4-hydroxybenzoate nonaprenyltransferase activity	Molecular Function	1	2	1	0.478725	gene-LOC100797753
GO:0046964	3'-phosphoadenosine 5'-phosphosulfate transmembrane transporter activity	Molecular Function	1	2	1	0.478725	gene-LOC100789415
GO:1902936	phosphatidylinositol bisphosphate binding	Molecular Function	1	2	1	0.478725	gene-LOC100817169
GO:0004719	protein-L-isoaspartate (D-aspartate) O-methyltransferase activity	Molecular Function	1	2	1	0.478725	Glycine_max_newGene_130
GO:0008689	3-demethylubiquinone-9 3-O-methyltransferase activity	Molecular Function	1	2	1	0.478725	gene-LOC100783802
GO:0034986	iron chaperone activity	Molecular Function	1	2	1	0.478725	gene-LOC100811801
GO:0009979	16:0 monogalactosyldiacylglycerol desaturase activity	Molecular Function	1	2	1	0.478725	gene-FAD5.2
GO:0016688	L-ascorbate peroxidase activity	Molecular Function	1	2	1	0.478725	gene-APX1
GO:0042805	actinin binding	Molecular Function	1	2	1	0.478725	gene-LOC100814445
GO:0003939	L-iditol 2-dehydrogenase activity	Molecular Function	1	2	1	0.478725	gene-LOC100791559
GO:0004160	dihydroxy-acid dehydratase activity	Molecular Function	1	2	1	0.478725	gene-LOC100806689
GO:0035597	N6-isopentenyladenosine methylthiotransferase activity	Molecular Function	1	2	1	0.478725	gene-LOC100799544
GO:0016166	phytoene dehydrogenase activity	Molecular Function	1	2	1	0.478725	gene-PDS1
GO:0004040	amidase activity	Molecular Function	1	2	1	0.478725	gene-LOC100780821
GO:0051743	red chlorophyll catabolite reductase activity	Molecular Function	1	2	1	0.478725	gene-LOC100777640
GO:0004334	fumarylacetoacetase activity	Molecular Function	1	2	1	0.478725	gene-LOC100812790
GO:0043333	2-octaprenyl-6-methoxy-1,4-benzoquinone methyltransferase activity	Molecular Function	1	2	1	0.478725	gene-LOC100794692
GO:0001002	RNA polymerase III type 1 promoter sequence-specific DNA binding	Molecular Function	1	2	1	0.478725	gene-LOC100793357
GO:0050515	4-(cytidine 5'-diphospho)-2-C-methyl-D-erythritol kinase activity	Molecular Function	1	2	1	0.478725	gene-LOC100812541
GO:0004076	biotin synthase activity	Molecular Function	1	2	1	0.478725	gene-LOC732577
GO:0046404	ATP-dependent polydeoxyribonucleotide 5'-hydroxyl-kinase activity	Molecular Function	1	2	1	0.478725	gene-LOC100796730
GO:0000403	Y-form DNA binding	Molecular Function	1	2	1	0.478725	gene-LOC100797086
GO:0051393	alpha-actinin binding	Molecular Function	1	2	1	0.478725	gene-LOC100814445
GO:0008832	dGTPase activity	Molecular Function	1	2	1	0.478725	gene-LOC100796869
GO:0018773	acetylpyruvate hydrolase activity	Molecular Function	1	2	1	0.478725	gene-LOC100775700
GO:0004019	adenylosuccinate synthase activity	Molecular Function	1	2	1	0.478725	gene-LOC100792329
GO:0003904	deoxyribodipyrimidine photo-lyase activity	Molecular Function	1	2	1	0.478725	gene-PHR
GO:0008425	2-polyprenyl-6-methoxy-1,4-benzoquinone methyltransferase activity	Molecular Function	1	2	1	0.478725	gene-LOC100783802
GO:0008806	carboxymethylenebutenolidase activity	Molecular Function	1	2	1	0.478725	gene-LOC100790249
GO:0005353	fructose transmembrane transporter activity	Molecular Function	1	2	1	0.478725	gene-LOC100801856
GO:0030626	U12 snRNA binding	Molecular Function	1	2	1	0.478725	gene-LOC100814307
GO:0052824	dolichyl-pyrophosphate Man7GlcNAc2 alpha-1,6-mannosyltransferase activity	Molecular Function	1	2	1	0.478725	gene-LOC100786127
GO:0015444	magnesium-importing ATPase activity	Molecular Function	1	2	1	0.478725	gene-LOC100795153
GO:0016303	1-phosphatidylinositol-3-kinase activity	Molecular Function	1	2	1	0.478725	gene-LOC547983
GO:0050017	L-3-cyanoalanine synthase activity	Molecular Function	1	2	1	0.478725	gene-LOC100806420
GO:0051267	CP2 mannose-ethanolamine phosphotransferase activity	Molecular Function	1	2	1	0.478725	gene-LOC100791027
GO:0036361	racemase activity, acting on amino acids and derivatives	Molecular Function	1	2	1	0.478725	gene-LOC100792806
GO:0052929	ATP:3'-cytidine-cytidine-tRNA adenylyltransferase activity	Molecular Function	1	2	1	0.478725	gene-LOC100527248
GO:0050145	nucleoside phosphate kinase activity	Molecular Function	1	2	1	0.478725	gene-LOC100796730
GO:1990165	single-strand break-containing DNA binding	Molecular Function	1	2	1	0.478725	gene-LOC100786762
GO:0043878	glyceraldehyde-3-phosphate dehydrogenase (NAD+) (non-phosphorylating) activity	Molecular Function	1	2	1	0.478725	gene-LOC100786773
GO:0004370	glycerol kinase activity	Molecular Function	1	2	1	0.478725	gene-GK
GO:0010285	L,L-diaminopimelate aminotransferase activity	Molecular Function	1	2	1	0.478725	gene-LOC100807796
GO:0004358	glutamate N-acetyltransferase activity	Molecular Function	1	2	1	0.478725	gene-LOC100809547
GO:0032183	SUMO binding	Molecular Function	1	2	1	0.478725	gene-LOC100527665
GO:0004636	phosphoribosyl-ATP diphosphatase activity	Molecular Function	1	2	1	0.478725	gene-LOC100807276
GO:0008685	2-C-methyl-D-erythritol 2,4-cyclodiphosphate synthase activity	Molecular Function	1	2	1	0.478725	gene-LOC100306378
GO:0005090	Sar guanyl-nucleotide exchange factor activity	Molecular Function	1	2	1	0.478725	gene-LOC100786727
GO:2001066	amylopectin binding	Molecular Function	1	2	1	0.478725	gene-LOC100792611
GO:0050105	L-gulonolactone oxidase activity	Molecular Function	1	2	1	0.478725	gene-LOC100806810
GO:0008252	nucleotidase activity	Molecular Function	1	2	1	0.478725	gene-LOC100776267
GO:0004360	glutamine-fructose-6-phosphate transaminase (isomerizing) activity	Molecular Function	1	2	1	0.478725	gene-LOC100779312
GO:0016832	aldehyde-lyase activity	Molecular Function	1	2	1	0.478725	gene-LOC100779987
GO:0004123	cystathionine gamma-lyase activity	Molecular Function	1	2	1	0.478725	gene-LOC100812354
GO:0000994	RNA polymerase III core binding	Molecular Function	1	2	1	0.478725	gene-LOC100793357
GO:0080041	ADP-ribose pyrophosphohydrolase activity	Molecular Function	1	2	1	0.478725	gene-LOC100818255
GO:0008780	acyl-[acyl-carrier-protein]-UDP-N-acetylglucosamine O-acyltransferase activity	Molecular Function	1	2	1	0.478725	gene-LOC100798746
GO:0080042	ADP-glucose pyrophosphohydrolase activity	Molecular Function	1	2	1	0.478725	gene-LOC100818255
GO:0052659	inositol-1,3,4,5-tetrakisphosphate 5-phosphatase activity	Molecular Function	1	2	1	0.478725	gene-LOC100784981
GO:0030674	protein binding, bridging	Molecular Function	8	27	1	0.488113	gene-LOC100818162;gene-LOC100784648;gene-LOC100796048;gene-LOC100305859;gene-LOC100778100;gene-LOC100811312;gene-LOC100782816;gene-LOC100793279
GO:0019843	rRNA binding	Molecular Function	18	63	1	0.493234	gene-LOC100527168;gene-LOC100810086;gene-LOC100798516;gene-LOC547645;gene-LOC100500079;gene-LOC100807649;gene-LOC100305898;gene-LOC100811654;gene-LOC102669418;gene-RPL37;gene-LOC100811336;gene-LOC100790098;gene-LOC100306503;Glycine_max_newGene_6000;gene-LOC100305663;gene-LOC100810611;gene-LOC100809899;gene-LOC100811303
GO:0008865	fructokinase activity	Molecular Function	6	20	1	0.496778	gene-LOC100780082;gene-LOC100808324;gene-LOC100817266;gene-LOC100803713;gene-LOC100814192;gene-LOC100783175
GO:0070290	N-acylphosphatidylethanolamine-specific phospholipase D activity	Molecular Function	6	20	1	0.496778	gene-LOC100814486;gene-LOC100784434;gene-LOC100801787;gene-LOC100794849;gene-LOC100791059;gene-LOC100786410
GO:0004714	transmembrane receptor protein tyrosine kinase activity	Molecular Function	11	38	1	0.498413	gene-LOC100784640;gene-LOC100778819;gene-LOC100305388;gene-LOC100819499;gene-LOC100792249;gene-LOC100786387;gene-LOC100795611;gene-LOC100788153;gene-LOC100305365;gene-LOC100806943;gene-LOC100816683
GO:1901265	nucleoside phosphate binding	Molecular Function	11	38	1	0.498413	gene-LOC100804158;gene-LOC100500682;gene-LOC100527623;gene-LOC100804739;gene-LOC100775953;gene-LOC100306535;gene-LOC100814412;gene-LOC100805150;gene-LOC100807200;gene-GF14A;gene-LOC100780156
GO:0016491	oxidoreductase activity	Molecular Function	193	693	1	0.502892	gene-LOC100776120;gene-LOC100777167;gene-LOC100782608;gene-LOC100811246;gene-LOC100808148;gene-LOC100808473;gene-LOC100798454;gene-LOC100782701;gene-LOC100808812;gene-LOC100807481;gene-LOC100499934;gene-LOC100798971;gene-LOC100780585;gene-LOC100305990;gene-LOC100816716;gene-LOC100809416;gene-LOC100816854;gene-LOC100305959;gene-LOC100775182;gene-LOC100782970;gene-LOC102660758;gene-LOC100799135;gen…
GO:0010181	FMN binding	Molecular Function	19	67	1	0.505631	Glycine_max_newGene_435;gene-LOC100788868;gene-LOC100499870;gene-LOC100777153;gene-LOC100810522;gene-LOC100170730;gene-LOC100789057;gene-LOC100796226;gene-LOC100779815;gene-LOC100819513;gene-LOC100777389;gene-LOC100305601;gene-LOC100815931;gene-LOC100499662;gene-LOC100805113;gene-LOC100170736;gene-LOC100803581;gene-LOC100807532;gene-LOC100811224
GO:0003918	DNA topoisomerase type II (ATP-hydrolyzing) activity	Molecular Function	4	13	1	0.508968	gene-LOC100787008;gene-LOC100782577;gene-LOC100809558;gene-LOC100796974
GO:0070577	lysine-acetylated histone binding	Molecular Function	4	13	1	0.508968	gene-LOC100814812;gene-LOC100799986;gene-LOC100793896;gene-LOC100799455
GO:0016410	N-acyltransferase activity	Molecular Function	4	13	1	0.508968	gene-LOC100816896;gene-LOC100815716;gene-LOC100804749;gene-LOC100817021
GO:0005249	voltage-gated potassium channel activity	Molecular Function	7	24	1	0.517462	gene-LOC100795201;gene-LOC100798422;gene-LOC100808425;gene-LOC100797927;gene-LOC100811356;gene-LOC100811465;gene-LOC100810967
GO:0019900	kinase binding	Molecular Function	7	24	1	0.517462	gene-HIR1;gene-LOC100814445;gene-HIR3;gene-LOC100804982;gene-LOC100306559;gene-LOC100790880;gene-LOC100789295
GO:0004650	polygalacturonase activity	Molecular Function	28	100	1	0.52017	gene-LOC100818007;gene-LOC100777503;gene-LOC100778981;gene-LOC100783813;gene-LOC100794954;gene-LOC100782602;gene-LOC100801823;gene-LOC100816232;gene-LOC100819195;gene-LOC100818529;gene-LOC100801914;gene-LOC100776827;gene-LOC732602;gene-LOC100806574;gene-LOC100786985;gene-LOC100785841;gene-LOC100794916;gene-LOC100801217;gene-LOC100797770;gene-LOC100803375;gene-LOC100814190;gene-LOC100787980;gene-L…
GO:0016301	kinase activity	Molecular Function	68	245	1	0.53068	gene-LOC100810362;gene-LOC100800873;gene-LOC100814445;gene-LOC100798850;gene-LOC100778394;gene-LOC100797214;gene-LOC102661225;gene-LOC100792453;gene-LOC102661902;gene-LOC100801047;gene-LOC100775314;gene-LOC100793696;gene-LOC100803036;gene-LOC100796422;gene-LOC100786137;gene-LOC100818404;Glycine_max_newGene_9340;gene-LOC100806896;gene-LOC100780747;gene-IPK2;gene-LOC100801705;Glycine_max_newGene_76…
GO:0003855	3-dehydroquinate dehydratase activity	Molecular Function	2	6	1	0.531115	Glycine_max_newGene_9502;gene-LOC100788604
GO:0004157	dihydropyrimidinase activity	Molecular Function	2	6	1	0.531115	gene-LOC100804632;gene-LOC100818990
GO:0003856	3-dehydroquinate synthase activity	Molecular Function	2	6	1	0.531115	gene-LOC100806628;gene-LOC100812989
GO:0003861	3-isopropylmalate dehydratase activity	Molecular Function	2	6	1	0.531115	gene-LOC100782688;gene-LOC100782626
GO:0102391	decanoate--CoA ligase activity	Molecular Function	2	6	1	0.531115	gene-LOC100816780;gene-LOC100787691
GO:0003996	acyl-CoA ligase activity	Molecular Function	2	6	1	0.531115	gene-LOC100816780;gene-LOC100787691
GO:0000339	RNA cap binding	Molecular Function	2	6	1	0.531115	gene-LOC100791079;gene-LOC100812441
GO:0047429	nucleoside-triphosphate diphosphatase activity	Molecular Function	2	6	1	0.531115	gene-LOC100802983;gene-LOC100792444
GO:0008381	mechanically-gated ion channel activity	Molecular Function	2	6	1	0.531115	gene-LOC102665658;gene-LOC100813521
GO:0046524	sucrose-phosphate synthase activity	Molecular Function	2	6	1	0.531115	gene-LOC100806543;gene-LOC100807527
GO:0005534	galactose binding	Molecular Function	2	6	1	0.531115	gene-LOC100796793;gene-LOC100795881
GO:0004174	electron-transferring-flavoprotein dehydrogenase activity	Molecular Function	2	6	1	0.531115	gene-LOC100818210;gene-LOC100813439
GO:0004751	ribose-5-phosphate isomerase activity	Molecular Function	2	6	1	0.531115	gene-LOC100781866;gene-LOC100795150
GO:0016040	glutamate synthase (NADH) activity	Molecular Function	2	6	1	0.531115	gene-LOC100819513;gene-LOC100815931
GO:0004865	protein serine/threonine phosphatase inhibitor activity	Molecular Function	2	6	1	0.531115	Glycine_max_newGene_901;gene-LOC100527761
GO:0004042	acetyl-CoA:L-glutamate N-acetyltransferase activity	Molecular Function	2	6	1	0.531115	gene-LOC100809547;gene-LOC100814183
GO:0016639	oxidoreductase activity, acting on the CH-NH2 group of donors, NAD or NADP as acceptor	Molecular Function	2	6	1	0.531115	gene-GDH1;gene-LOC100793231
GO:0045486	naringenin 3-dioxygenase activity	Molecular Function	2	6	1	0.531115	gene-LOC100780057;gene-F3H
GO:0004764	shikimate 3-dehydrogenase (NADP+) activity	Molecular Function	2	6	1	0.531115	gene-LOC100788604;Glycine_max_newGene_9502
GO:0051082	unfolded protein binding	Molecular Function	63	227	1	0.531618	gene-LOC100779976;gene-LOC100799098;gene-LOC100809943;gene-LOC100798567;gene-LOC100807416;gene-LOC100804763;gene-LOC100797897;gene-LOC100793839;gene-LOC100802428;gene-LOC100499943;Glycine_max_newGene_1986;gene-LOC100812005;gene-LOC100803843;gene-LOC100810718;gene-LOC100786888;gene-LOC100802236;gene-LOC100784862;gene-LOC100499849;gene-LOC100777767;gene-LOC100778141;gene-LOC100801827;gene-LOC100499…
GO:0045159	myosin II binding	Molecular Function	5	17	1	0.532199	gene-LOC100793138;gene-LOC100805150;gene-LOC100811853;gene-LOC100789319;gene-LOC100782049
GO:0000250	lanosterol synthase activity	Molecular Function	5	17	1	0.532199	gene-LOC100810544;gene-LOC100810400;gene-AMS1;gene-LOC548054;gene-LOC100797878
GO:0045551	cinnamyl-alcohol dehydrogenase activity	Molecular Function	5	17	1	0.532199	gene-LOC100779140;gene-CAD1;gene-LOC100816901;gene-LOC100804892;gene-LOC100820588
GO:0043167	ion binding	Molecular Function	40	144	1	0.534095	gene-LOC100804887;gene-LOC100305501;gene-LOC100804158;gene-LOC100305854;gene-LOC100778290;gene-LOC100788395;gene-LOC100803729;gene-GMAFB3B;Glycine_max_newGene_9129;gene-LOC100797982;gene-LOC100794729;gene-LOC100786292;gene-LOC100807836;gene-LOC100796250;gene-LOC100817169;gene-LOC100775953;gene-LOC100799499;gene-LOC100794899;gene-LOC100499880;gene-LOC100806283;gene-GMMT3;gene-GMGLYII-12;gene-LOC10…
GO:0008536	Ran GTPase binding	Molecular Function	9	32	1	0.550467	gene-LOC100787912;gene-LOC100801426;gene-LOC100791060;gene-LOC100806017;gene-LOC100797325;gene-LOC100782006;gene-LOC100792825;gene-LOC100802384;gene-LOC100785151
GO:2001070	starch binding	Molecular Function	9	32	1	0.550467	gene-LOC100796785;gene-LOC100778097;gene-LOC100795997;gene-LOC100786287;gene-LOC100780774;gene-LOC100816757;gene-LOC100792611;gene-LOC100798990;gene-LOC100797872
GO:0001671	ATPase activator activity	Molecular Function	6	21	1	0.550843	Glycine_max_newGene_10720;gene-LOC100800435;gene-LOC100798830;gene-LOC100805173;gene-LOC100810706;gene-LOC100790770
GO:0102229	amylopectin maltohydrolase activity	Molecular Function	6	21	1	0.550843	gene-LOC100305468;gene-LOC100816365;gene-LOC100812659;gene-LOC100805560;gene-LOC100777004;gene-LOC100786079
GO:0016161	beta-amylase activity	Molecular Function	6	21	1	0.550843	gene-LOC100786079;gene-LOC100777004;gene-LOC100812659;gene-LOC100805560;gene-LOC100816365;gene-LOC100305468
GO:0004197	cysteine-type endopeptidase activity	Molecular Function	32	116	1	0.555766	gene-LOC100817913;gene-LOC100806936;gene-LOC100814224;gene-LOC100805596;gene-LOC100795674;gene-LOC100775964;gene-LOC100788554;gene-LOC100782778;gene-LOC100778103;gene-VPE2;gene-LOC100812198;gene-LOC100791283;gene-LOC100791503;gene-LOC100791699;gene-LOC100170694;gene-LOC100788737;gene-LOC100814184;gene-CYSP2;gene-LOC100778716;gene-LOC100805702;gene-LOC100807362;gene-LOC100779565;gene-LOC100818224;…
GO:0038199	ethylene receptor activity	Molecular Function	3	10	1	0.556523	gene-LOC100787425;gene-LOC100802948;Glycine_max_newGene_10250
GO:0010179	IAA-Ala conjugate hydrolase activity	Molecular Function	3	10	1	0.556523	gene-LOC100794121;gene-LOC100784989;gene-LOC100785666
GO:0003983	UTP:glucose-1-phosphate uridylyltransferase activity	Molecular Function	3	10	1	0.556523	gene-LOC100790639;gene-LOC100794066;Glycine_max_newGene_8657
GO:0003852	2-isopropylmalate synthase activity	Molecular Function	3	10	1	0.556523	gene-LOC100788955;gene-LOC100776166;Glycine_max_newGene_7857
GO:0033862	UMP kinase activity	Molecular Function	3	10	1	0.556523	gene-LOC100306603;gene-LOC100805176;gene-LOC100500111
GO:0005337	nucleoside transmembrane transporter activity	Molecular Function	3	10	1	0.556523	gene-LOC100802339;gene-LOC100793043;Glycine_max_newGene_10130
GO:0016830	carbon-carbon lyase activity	Molecular Function	3	10	1	0.556523	gene-LOC100787350;gene-LOC100786478;gene-LOC100799111
GO:0008525	phosphatidylcholine transporter activity	Molecular Function	3	10	1	0.556523	gene-LOC100797297;gene-LOC100783495;gene-LOC100785793
GO:0051740	ethylene binding	Molecular Function	3	10	1	0.556523	Glycine_max_newGene_10250;gene-LOC100802948;gene-LOC100787425
GO:0004619	phosphoglycerate mutase activity	Molecular Function	3	10	1	0.556523	gene-LOC100820155;gene-LOC100784422;gene-LOC100777582
GO:0043682	copper-transporting ATPase activity	Molecular Function	3	10	1	0.556523	gene-HMA8;gene-LOC100778219;gene-LOC100798164
GO:0004590	orotidine-5'-phosphate decarboxylase activity	Molecular Function	3	10	1	0.556523	gene-LOC100780481;gene-LOC100807008;gene-LOC100799111
GO:0080139	borate efflux transmembrane transporter activity	Molecular Function	3	10	1	0.556523	Glycine_max_newGene_6586;gene-LOC100805633;gene-LOC100793554
GO:0004826	phenylalanine-tRNA ligase activity	Molecular Function	3	10	1	0.556523	gene-LOC100786433;gene-LOC100812830;gene-LOC100794763
GO:0015079	potassium ion transmembrane transporter activity	Molecular Function	10	36	1	0.564187	gene-LOC100790329;gene-LOC100799414;gene-LOC100814419;gene-LOC100793387;gene-LOC100798458;gene-LOC100806122;gene-LOC100777998;gene-LOC100778388;gene-LOC100776888;gene-LOC100803841
GO:0042973	glucan endo-1,3-beta-D-glucosidase activity	Molecular Function	7	25	1	0.566573	gene-LOC100799965;gene-LOC100775292;gene-LOC547822;gene-LOC100778892;gene-LOC100808209;gene-LOC100776067;gene-LOC100790297
GO:0030976	thiamine pyrophosphate binding	Molecular Function	7	25	1	0.566573	gene-LOC100789053;gene-LOC100798203;gene-LOC100809553;gene-LOC100787315;gene-LOC100781680;gene-LOC100816277;gene-LOC100786978
GO:0017022	myosin binding	Molecular Function	7	25	1	0.566573	gene-LOC100805150;gene-LOC100811853;gene-LOC102659721;gene-LOC100812001;gene-LOC100789319;gene-LOC100809307;gene-LOC100796290
GO:0015386	potassium:proton antiporter activity	Molecular Function	4	14	1	0.574736	gene-LOC100813332;gene-LOC100798822;gene-LOC100818163;gene-LOC100816746
GO:0008878	glucose-1-phosphate adenylyltransferase activity	Molecular Function	4	14	1	0.574736	gene-LOC100808791;gene-LOC100799431;gene-LOC100790187;gene-LOC100790220
GO:0004435	phosphatidylinositol phospholipase C activity	Molecular Function	5	18	1	0.589466	gene-LOC100786997;gene-LOC100799027;gene-LOC100784534;gene-LOC547863;gene-LOC100037460
GO:0004709	MAP kinase kinase kinase activity	Molecular Function	5	18	1	0.589466	gene-LOC100305365;gene-LOC100527019;gene-LOC100784454;gene-LOC100780636;gene-LOC100789341
GO:0042300	beta-amyrin synthase activity	Molecular Function	5	18	1	0.589466	gene-LOC100810400;gene-LOC100810544;gene-LOC100797878;gene-LOC548054;gene-AMS1
GO:0009927	histidine phosphotransfer kinase activity	Molecular Function	6	22	1	0.602077	gene-LOC100789608;gene-LOC100500044;gene-LOC100306589;gene-LOC100305640;gene-LOC100306665;gene-LOC100776020
GO:0004693	cyclin-dependent protein serine/threonine kinase activity	Molecular Function	17	63	1	0.604786	gene-LOC100814207;gene-LOC100791757;gene-LOC100799839;gene-LOC100786357;gene-LOC100795755;gene-LOC100792173;gene-LOC100780359;gene-LOC100776578;gene-LOC100789359;gene-LOC100790750;gene-LOC100807756;gene-LOC100782865;gene-LOC100786837;gene-LOC100127418;gene-LOC100776618;gene-LOC100819318;gene-LOC100814934
GO:0016209	antioxidant activity	Molecular Function	7	26	1	0.613229	gene-LOC100814030;gene-LOC100527081;gene-LOC100527038;gene-LOC100795126;gene-LOC100784029;gene-LOC100499858;gene-LOC100813627
GO:0008810	cellulase activity	Molecular Function	11	41	1	0.613669	gene-CEL12;gene-LOC100817996;gene-LOC100101849;gene-LOC100802662;gene-LOC100812226;gene-LOC100804372;gene-LOC732598;gene-CEL8;Glycine_max_newGene_5785;gene-LOC100820195;gene-LOC100793289
GO:0016874	ligase activity	Molecular Function	40	148	1	0.614047	gene-4CL4;gene-RTRP3;gene-LOC100819656;gene-LOC100789524;gene-LOC100782532;gene-LOC100787242;gene-LOC100527169;gene-LOC100819729;gene-LOC100790524;gene-LOC100500061;gene-LOC100801143;gene-LOC100793230;gene-LOC100797138;gene-LOC100795579;gene-LOC100783685;gene-LOC100780636;gene-LOC100807061;gene-LOC100787233;gene-LOC100816570;gene-LOC100777140;gene-LOC547939;gene-LOC100815043;gene-LOC100797707;gen…
GO:0052716	hydroquinone:oxygen oxidoreductase activity	Molecular Function	15	56	1	0.61726	gene-LOC100779825;gene-LOC100797749;gene-LOC100788550;gene-LOC100797234;gene-LOC100785096;gene-LOC547704;gene-LOC100777925;gene-LOC100808948;gene-LOC100811833;gene-LOC100796779;gene-LOC100811534;gene-LOC100806257;gene-LOC100814128;gene-LOC100810993;gene-LOC100792688
GO:0043539	protein serine/threonine kinase activator activity	Molecular Function	2	7	1	0.622101	gene-LOC100817060;gene-LOC100815605
GO:0016655	oxidoreductase activity, acting on NAD(P)H, quinone or similar compound as acceptor	Molecular Function	2	7	1	0.622101	gene-LOC100527195;gene-LOC100811620
GO:0004022	alcohol dehydrogenase (NAD) activity	Molecular Function	2	7	1	0.622101	gene-LOC100800668;gene-ADH2
GO:0004366	glycerol-3-phosphate O-acyltransferase activity	Molecular Function	2	7	1	0.622101	gene-LOC100814759;gene-LOC100776240
GO:0016767	geranylgeranyl-diphosphate geranylgeranyltransferase activity	Molecular Function	2	7	1	0.622101	Glycine_max_newGene_6295;gene-LOC100811518
GO:0070402	NADPH binding	Molecular Function	2	7	1	0.622101	gene-LOC100807997;gene-LOC100819889
GO:0004605	phosphatidate cytidylyltransferase activity	Molecular Function	2	7	1	0.622101	gene-LOC100806850;gene-LOC100802781
GO:0047780	citrate dehydratase activity	Molecular Function	2	7	1	0.622101	gene-LOC100810088;gene-LOC100811955
GO:0004049	anthranilate synthase activity	Molecular Function	2	7	1	0.622101	gene-LOC100781618;gene-LOC102663037
GO:0016807	cysteine-type carboxypeptidase activity	Molecular Function	2	7	1	0.622101	gene-LOC100808340;gene-LOC100797239
GO:0102420	sn-1-glycerol-3-phosphate C16:0-DCA-CoA acyl transferase activity	Molecular Function	2	7	1	0.622101	gene-LOC100776240;gene-LOC100814759
GO:0004385	guanylate kinase activity	Molecular Function	2	7	1	0.622101	gene-LOC100808931;gene-LOC100527163
GO:0004630	phospholipase D activity	Molecular Function	8	30	1	0.623302	gene-LOC100786410;gene-LOC100784434;gene-LOC100814486;gene-LOC100791059;gene-LOC100794849;gene-LOC100801787;gene-LOC100801286;gene-LOC100805294
GO:0008081	phosphoric diester hydrolase activity	Molecular Function	8	30	1	0.623302	gene-LOC100805096;gene-LOC100793490;gene-LOC100812719;gene-LOC100798507;gene-LOC100798420;gene-LOC100798171;gene-LOC100798253;gene-LOC100794323
GO:0004832	valine-tRNA ligase activity	Molecular Function	1	3	1	0.62365	gene-LOC100798111
GO:0000703	oxidized pyrimidine nucleobase lesion DNA N-glycosylase activity	Molecular Function	1	3	1	0.62365	gene-LOC100818398
GO:0047710	bis(5'-adenosyl)-triphosphatase activity	Molecular Function	1	3	1	0.62365	gene-LOC100305764
GO:0009039	urease activity	Molecular Function	1	3	1	0.62365	gene-URE
GO:0051745	4-hydroxy-3-methylbut-2-en-1-yl diphosphate reductase activity	Molecular Function	1	3	1	0.62365	gene-LOC100818067
GO:0015140	malate transmembrane transporter activity	Molecular Function	1	3	1	0.62365	gene-LOC100816412
GO:0071568	UFM1 transferase activity	Molecular Function	1	3	1	0.62365	gene-LOC100808087
GO:0046570	methylthioribulose 1-phosphate dehydratase activity	Molecular Function	1	3	1	0.62365	gene-LOC100796209
GO:0070840	dynein complex binding	Molecular Function	1	3	1	0.62365	gene-LOC100813969
GO:0004424	imidazoleglycerol-phosphate dehydratase activity	Molecular Function	1	3	1	0.62365	gene-LOC100804707
GO:0000293	ferric-chelate reductase activity	Molecular Function	1	3	1	0.62365	gene-LOC100306179
GO:0008251	tRNA-specific adenosine deaminase activity	Molecular Function	1	3	1	0.62365	gene-LOC100789591
GO:0010301	xanthoxin dehydrogenase activity	Molecular Function	1	3	1	0.62365	gene-LOC100786658
GO:0047974	guanosine deaminase activity	Molecular Function	1	3	1	0.62365	gene-LOC100816644
GO:0042171	lysophosphatidic acid acyltransferase activity	Molecular Function	1	3	1	0.62365	gene-LOC100808362
GO:0015117	thiosulfate transmembrane transporter activity	Molecular Function	1	3	1	0.62365	gene-LOC100816412
GO:0015141	succinate transmembrane transporter activity	Molecular Function	1	3	1	0.62365	gene-LOC100816412
GO:0019203	carbohydrate phosphatase activity	Molecular Function	1	3	1	0.62365	gene-LOC100786287
GO:0050505	hydroquinone glucosyltransferase activity	Molecular Function	1	3	1	0.62365	gene-LOC100779176
GO:0000213	tRNA-intron endonuclease activity	Molecular Function	1	3	1	0.62365	gene-LOC100810335
GO:0015217	ADP transmembrane transporter activity	Molecular Function	1	3	1	0.62365	gene-LOC100787682
GO:0004445	inositol-polyphosphate 5-phosphatase activity	Molecular Function	1	3	1	0.62365	gene-LOC100784981
GO:0051723	protein methylesterase activity	Molecular Function	1	3	1	0.62365	gene-LOC100797966
GO:0051499	D-aminoacyl-tRNA deacylase activity	Molecular Function	1	3	1	0.62365	gene-LOC100787782
GO:0035174	histone serine kinase activity	Molecular Function	1	3	1	0.62365	gene-LOC100775802
GO:0010487	thermospermine synthase activity	Molecular Function	1	3	1	0.62365	gene-LOC100784972
GO:0004338	glucan exo-1,3-beta-glucosidase activity	Molecular Function	1	3	1	0.62365	gene-LOC100775292
GO:0015131	oxaloacetate transmembrane transporter activity	Molecular Function	1	3	1	0.62365	gene-LOC100816412
GO:0003862	3-isopropylmalate dehydrogenase activity	Molecular Function	1	3	1	0.62365	gene-LOC100807689
GO:0004781	sulfate adenylyltransferase (ATP) activity	Molecular Function	1	3	1	0.62365	gene-LOC100805275
GO:0046403	polynucleotide 3'-phosphatase activity	Molecular Function	1	3	1	0.62365	gene-LOC100796730
GO:0004729	oxygen-dependent protoporphyrinogen oxidase activity	Molecular Function	1	3	1	0.62365	gene-HEMG
GO:0003991	acetylglutamate kinase activity	Molecular Function	1	3	1	0.62365	gene-LOC100814183
GO:0015116	sulfate transmembrane transporter activity	Molecular Function	1	3	1	0.62365	gene-LOC100816412
GO:0000247	C-8 sterol isomerase activity	Molecular Function	1	3	1	0.62365	gene-LOC100783250
GO:0010331	gibberellin binding	Molecular Function	1	3	1	0.62365	gene-LOC100775474
GO:0008836	diaminopimelate decarboxylase activity	Molecular Function	1	3	1	0.62365	gene-LOC100791677
GO:0034256	chlorophyll(ide) b reductase activity	Molecular Function	1	3	1	0.62365	gene-LOC100797874
GO:0008840	4-hydroxy-tetrahydrodipicolinate synthase	Molecular Function	1	3	1	0.62365	gene-DHPS1
GO:0050355	triphosphatase activity	Molecular Function	1	3	1	0.62365	gene-LOC100778542
GO:0052747	sinapyl alcohol dehydrogenase activity	Molecular Function	1	3	1	0.62365	gene-CAD1
GO:0042577	lipid phosphatase activity	Molecular Function	1	3	1	0.62365	gene-LOC100793065
GO:0043874	acireductone synthase activity	Molecular Function	1	3	1	0.62365	gene-LOC100796209
GO:0004822	isoleucine-tRNA ligase activity	Molecular Function	1	3	1	0.62365	gene-LOC100791830
GO:0016207	4-coumarate-CoA ligase activity	Molecular Function	1	3	1	0.62365	gene-4CL2
GO:0070492	oligosaccharide binding	Molecular Function	1	3	1	0.62365	gene-LOC100792611
GO:0004733	pyridoxamine-phosphate oxidase activity	Molecular Function	1	3	1	0.62365	gene-LOC100779815
GO:0070012	oligopeptidase activity	Molecular Function	1	3	1	0.62365	gene-LOC100812955
GO:0005458	GDP-mannose transmembrane transporter activity	Molecular Function	1	3	1	0.62365	gene-LOC100785777
GO:0043716	2-hydroxy-3-keto-5-methylthiopentenyl-1-phosphate phosphatase activity	Molecular Function	1	3	1	0.62365	gene-LOC100796209
GO:0004021	L-alanine:2-oxoglutarate aminotransferase activity	Molecular Function	1	3	1	0.62365	gene-ALAAT2
GO:0047274	galactinol-sucrose galactosyltransferase activity	Molecular Function	1	3	1	0.62365	gene-LOC100790775
GO:1990404	protein ADP-ribosylase activity	Molecular Function	1	3	1	0.62365	gene-LOC100814110
GO:0000400	four-way junction DNA binding	Molecular Function	1	3	1	0.62365	gene-LOC100811104
GO:0043715	2,3-diketo-5-methylthiopentyl-1-phosphate enolase activity	Molecular Function	1	3	1	0.62365	gene-LOC100796209
GO:0015108	chloride transmembrane transporter activity	Molecular Function	1	3	1	0.62365	gene-LOC100817901
GO:0036524	protein deglycase activity	Molecular Function	1	3	1	0.62365	gene-LOC100807226
GO:0004640	phosphoribosylanthranilate isomerase activity	Molecular Function	1	3	1	0.62365	gene-LOC100812873
GO:0046510	UDP-sulfoquinovose:DAG sulfoquinovosyltransferase activity	Molecular Function	1	3	1	0.62365	gene-LOC100780899
GO:0004337	geranyltranstransferase activity	Molecular Function	1	3	1	0.62365	gene-LOC100802347
GO:0019148	D-cysteine desulfhydrase activity	Molecular Function	1	3	1	0.62365	gene-LOC100815229
GO:0050291	sphingosine N-acyltransferase activity	Molecular Function	1	3	1	0.62365	gene-LOC100804749
GO:0035596	methylthiotransferase activity	Molecular Function	1	3	1	0.62365	gene-LOC100798865
GO:0001055	RNA polymerase II activity	Molecular Function	1	3	1	0.62365	gene-LOC100527865
GO:0004649	poly(ADP-ribose) glycohydrolase activity	Molecular Function	1	3	1	0.62365	gene-LOC100793905
GO:0004769	steroid delta-isomerase activity	Molecular Function	1	3	1	0.62365	gene-LOC100783250
GO:0008967	phosphoglycolate phosphatase activity	Molecular Function	1	3	1	0.62365	gene-LOC100305976
GO:0008296	3'-5'-exodeoxyribonuclease activity	Molecular Function	1	3	1	0.62365	gene-LOC100814321
GO:0003916	DNA topoisomerase activity	Molecular Function	1	3	1	0.62365	Glycine_max_newGene_5802
GO:0005254	chloride channel activity	Molecular Function	1	3	1	0.62365	gene-LOC100792403
GO:0032947	protein complex scaffold activity	Molecular Function	1	3	1	0.62365	gene-LOC100808879
GO:0003826	alpha-ketoacid dehydrogenase activity	Molecular Function	1	3	1	0.62365	gene-LOC100779198
GO:0035529	NADH pyrophosphatase activity	Molecular Function	3	11	1	0.627926	Glycine_max_newGene_70;gene-LOC100819062;gene-LOC100793335
GO:0009001	serine O-acetyltransferase activity	Molecular Function	3	11	1	0.627926	gene-SAT1;gene-LOC100820316;gene-LOC100779106
GO:0140033	acetylation-dependent protein binding	Molecular Function	3	11	1	0.627926	gene-LOC100799986;gene-LOC100793896;gene-LOC100799455
GO:0052725	inositol-1,3,4-trisphosphate 6-kinase activity	Molecular Function	3	11	1	0.627926	gene-LOC100815703;gene-LOC100776901;gene-ITPK4
GO:0052726	inositol-1,3,4-trisphosphate 5-kinase activity	Molecular Function	3	11	1	0.627926	gene-LOC100815703;gene-LOC100776901;gene-ITPK4
GO:0047325	inositol tetrakisphosphate 1-kinase activity	Molecular Function	3	11	1	0.627926	gene-ITPK4;gene-LOC100815703;gene-LOC100776901
GO:0051536	iron-sulfur cluster binding	Molecular Function	9	34	1	0.632534	gene-LOC100811312;gene-LOC100527785;gene-LOC106797183;gene-LOC100807125;gene-LOC100803112;gene-LOC100786478;gene-LOC100806364;gene-LOC100787350;gene-LOC100500300
GO:0004407	histone deacetylase activity	Molecular Function	4	15	1	0.635171	gene-LOC100779296;gene-LOC100786705;gene-LOC100784468;gene-LOC100804681
GO:0097602	cullin family protein binding	Molecular Function	4	15	1	0.635171	gene-LOC100527072;gene-LOC100798104;gene-LOC100806622;gene-LOC100811974
GO:0004766	spermidine synthase activity	Molecular Function	4	15	1	0.635171	gene-LOC100815244;gene-LOC100792107;gene-LOC100812978;gene-LOC100790506
GO:0005247	voltage-gated chloride channel activity	Molecular Function	4	15	1	0.635171	gene-LOC100777943;gene-LOC100787625;gene-LOC100817901;gene-LOC100796023
GO:0005102	receptor binding	Molecular Function	10	38	1	0.641086	gene-LOC100796864;gene-LOC100780150;gene-LOC100807370;gene-LOC100794002;gene-LOC100788575;gene-LOC100818900;gene-LOC100808483;gene-LOC100789884;gene-LOC100801433;gene-LOC100809631
GO:0004024	alcohol dehydrogenase activity, zinc-dependent	Molecular Function	5	19	1	0.642626	gene-LOC100819938;gene-LOC100788053;gene-LOC100816775;gene-LOC547658;gene-LOC100788587
GO:0016274	protein-arginine N-methyltransferase activity	Molecular Function	5	19	1	0.642626	gene-LOC100809174;gene-LOC112997712;gene-LOC100809171;gene-LOC100795951;gene-LOC100809620
GO:0004144	diacylglycerol O-acyltransferase activity	Molecular Function	5	19	1	0.642626	gene-LOC100798444;gene-DGAT1A;gene-LOC100816273;gene-LOC100807246;gene-LOC100809628
GO:0090447	glycerol-3-phosphate 2-O-acyltransferase activity	Molecular Function	5	19	1	0.642626	gene-LOC100810787;gene-LOC100794137;gene-LOC100783292;gene-LOC100808918;gene-LOC100795122
GO:0016620	oxidoreductase activity, acting on the aldehyde or oxo group of donors, NAD or NADP as acceptor	Molecular Function	5	19	1	0.642626	gene-LOC100782924;gene-LOC100783902;gene-LOC100778722;gene-LOC732655;gene-LOC100804853
GO:0004222	metalloendopeptidase activity	Molecular Function	29	109	1	0.645112	gene-LOC100810101;gene-LOC100790273;gene-LOC100812375;gene-LOC100799127;gene-SLTI114;gene-LOC100820140;gene-LOC100800848;gene-LOC100781237;gene-LOC100788818;gene-LOC100787769;gene-LOC100807772;gene-LOC100799274;gene-LOC100793518;gene-LOC100791317;gene-LOC100798355;Glycine_max_newGene_10892;gene-LOC100786104;gene-LOC100811552;gene-LOC100804856;gene-LOC100306288;gene-LOC100788622;gene-LOC100807188;…
GO:0008353	RNA polymerase II carboxy-terminal domain kinase activity	Molecular Function	11	42	1	0.649073	gene-LOC100786357;gene-LOC100814207;gene-LOC100791757;gene-LOC100807756;gene-LOC100786837;gene-LOC100819318;gene-LOC100814934;gene-LOC100792173;gene-LOC100776578;gene-LOC100789359;gene-LOC100790750
GO:0036094	small molecule binding	Molecular Function	20	76	1	0.655841	gene-LOC100805150;gene-LOC100807200;gene-GF14A;gene-LOC100814412;gene-LOC100306535;gene-LOC100775953;gene-LOC100527623;gene-LOC100806283;gene-LOC100499700;gene-LOC100500682;gene-LOC100801859;gene-LOC100814557;gene-LOC100780156;gene-CHL;gene-LOC100807836;gene-LOC100804739;gene-GMAFB3B;gene-LOC100794729;gene-LOC100305501;gene-LOC100804158
GO:0005385	zinc ion transmembrane transporter activity	Molecular Function	8	31	1	0.663819	gene-LOC100784745;gene-LOC100786061;gene-LOC100802186;gene-LOC100800396;gene-LOC100794874;gene-LOC100805124;gene-LOC100812212;gene-LOC100790458
GO:0060589	nucleoside-triphosphatase regulator activity	Molecular Function	9	35	1	0.670343	gene-LOC100788395;gene-LOC100804956;gene-LOC100499880;gene-LOC100790770;Glycine_max_newGene_9129;gene-LOC100800435;gene-LOC100779624;gene-LOC100793557;gene-LOC100306214
GO:0003714	transcription corepressor activity	Molecular Function	14	54	1	0.670408	gene-LOC100777440;gene-LOC100801449;gene-LOC100782878;gene-LOC100800401;gene-LOC100783690;gene-LOC100781854;gene-LOC100795889;gene-LOC100306332;gene-LOC100792917;gene-LOC100784468;gene-LOC100305852;gene-LOC100787821;gene-LOC100788070;gene-LOC100814493
GO:0008422	beta-glucosidase activity	Molecular Function	15	58	1	0.67682	gene-LOC100800603;gene-LOC100806123;gene-LOC100801874;gene-LOC100810985;gene-LOC100807128;gene-LOC100806362;gene-LOC100815268;gene-LOC547729;gene-LOC100816705;gene-LOC100780572;gene-SFR2;gene-LOC100814004;gene-LOC100791121;gene-LOC100789360;gene-LOC100819117
GO:0016747	transferase activity, transferring acyl groups other than amino-acyl groups	Molecular Function	52	196	1	0.680346	gene-LOC100818476;gene-LOC100781451;gene-LOC100816997;gene-LOC100819144;gene-LOC100815887;gene-LOC100818799;gene-LOC100801403;gene-LOC100794022;gene-LOC100775264;gene-LOC100776361;gene-LOC100817048;gene-LOC100794652;gene-LOC100777680;gene-LOC100816382;gene-LOC100789605;gene-LOC100782335;gene-LOC100820325;gene-LOC100792476;gene-DDKCS;gene-LOC100787907;gene-LOC100527026;gene-LOC100819383;gene-LOC10…
GO:0031593	polyubiquitin modification-dependent protein binding	Molecular Function	11	43	1	0.682621	gene-LOC100783508;gene-LOC100804038;gene-LOC100819019;gene-LOC100791370;gene-LOC100817821;gene-LOC100778187;gene-LOC100811870;gene-LOC100805946;gene-LOC100799580;gene-LOC100814594;gene-LOC100803975
GO:0002161	aminoacyl-tRNA editing activity	Molecular Function	4	16	1	0.689712	gene-LOC100798111;gene-LOC100791830;gene-LOC100812776;Glycine_max_newGene_7591
GO:0080032	methyl jasmonate esterase activity	Molecular Function	4	16	1	0.689712	gene-LOC100813562;gene-LOC100784567;gene-LOC100818550;gene-LOC100819876
GO:0005536	glucose binding	Molecular Function	4	16	1	0.689712	gene-LOC100783175;gene-LOC100782127;gene-LOC100808324;gene-LOC100817266
GO:0008195	phosphatidate phosphatase activity	Molecular Function	4	16	1	0.689712	gene-LOC100785459;gene-LOC100795884;gene-LOC100805924;gene-LOC100800585
GO:0080031	methyl salicylate esterase activity	Molecular Function	4	16	1	0.689712	gene-LOC100819876;gene-LOC100818550;gene-LOC100784567;gene-LOC100813562
GO:0004659	prenyltransferase activity	Molecular Function	3	12	1	0.690935	gene-LOC100782362;gene-LOC100785539;gene-LOC100805842
GO:0043295	glutathione binding	Molecular Function	3	12	1	0.690935	gene-HGS;gene-LOC100819783;gene-GSTF7
GO:0015112	nitrate transmembrane transporter activity	Molecular Function	3	12	1	0.690935	gene-LOC100802333;gene-LOC100794669;gene-LOC100819070
GO:0005085	guanyl-nucleotide exchange factor activity	Molecular Function	3	12	1	0.690935	gene-LOC100803721;gene-LOC100812785;gene-LOC100784894
GO:0005548	phospholipid transporter activity	Molecular Function	3	12	1	0.690935	gene-LOC100797297;gene-LOC100783495;gene-LOC100785793
GO:0080030	methyl indole-3-acetate esterase activity	Molecular Function	5	20	1	0.691242	gene-LOC100813562;gene-LOC100784567;gene-LOC100818550;gene-LOC100819876;gene-LOC100795903
GO:0048038	quinone binding	Molecular Function	6	24	1	0.694108	gene-LOC100802267;gene-LOC100798722;gene-LOC100778802;gene-LOC100817473;gene-LOC100819571;gene-PAO1
GO:0004525	ribonuclease III activity	Molecular Function	7	28	1	0.69767	gene-GMDCL3A;gene-GMDCL2B;gene-GMDCL2A;gene-LOC100527745;gene-LOC100816164;gene-LOC100818702;gene-LOC100797277
GO:0030983	mismatched DNA binding	Molecular Function	7	28	1	0.69767	gene-LOC100793891;gene-LOC100780255;gene-LOC100792272;gene-LOC100794788;gene-LOC100811104;gene-LOC100797567;gene-LOC100786762
GO:0030151	molybdenum ion binding	Molecular Function	2	8	1	0.698741	gene-LOC100794892;gene-INR2
GO:0102483	scopolin beta-glucosidase activity	Molecular Function	2	8	1	0.698741	gene-LOC100791121;gene-LOC100800603
GO:0010295	(+)-abscisic acid 8'-hydroxylase activity	Molecular Function	2	8	1	0.698741	gene-LOC100779978;gene-LOC100815135
GO:0008373	sialyltransferase activity	Molecular Function	2	8	1	0.698741	gene-STV2B;gene-STV2A
GO:0035312	5'-3' exodeoxyribonuclease activity	Molecular Function	2	8	1	0.698741	gene-LOC100798062;gene-LOC100801178
GO:0016629	12-oxophytodienoate reductase activity	Molecular Function	2	8	1	0.698741	gene-LOC100796226;gene-LOC100803581
GO:1990380	Lys48-specific deubiquitinase activity	Molecular Function	2	8	1	0.698741	gene-LOC100797239;gene-LOC100808340
GO:0033218	amide binding	Molecular Function	2	8	1	0.698741	gene-LOC100807200;gene-LOC100775953
GO:0046577	long-chain-alcohol oxidase activity	Molecular Function	2	8	1	0.698741	gene-LOC100775376;gene-LOC100787352
GO:0047196	long-chain-alcohol O-fatty-acyltransferase activity	Molecular Function	2	8	1	0.698741	gene-LOC100807246;gene-LOC100798444
GO:0003994	aconitate hydratase activity	Molecular Function	2	8	1	0.698741	gene-LOC100811955;gene-LOC100810088
GO:0003830	beta-1,4-mannosylglycoprotein 4-beta-N-acetylglucosaminyltransferase activity	Molecular Function	2	8	1	0.698741	gene-LOC100780085;gene-LOC100816069
GO:0016773	phosphotransferase activity, alcohol group as acceptor	Molecular Function	14	55	1	0.699351	gene-LOC100818404;gene-LOC100802163;gene-LOC100794767;gene-LOC100805150;gene-GK;gene-LOC100799353;gene-LOC100797982;gene-LOC100779892;gene-LOC100814445;gene-LOC100795532;gene-LOC100812560;Glycine_max_newGene_768;gene-LOC100792618;gene-LOC100778752
GO:0005216	ion channel activity	Molecular Function	8	32	1	0.701603	gene-LOC100785556;gene-LOC100798823;gene-LOC100820202;gene-LOC100795427;gene-LOC100816236;gene-LOC100783341;gene-LOC100810471;gene-LOC100801032
GO:0008374	O-acyltransferase activity	Molecular Function	9	36	1	0.705729	gene-LOC100800857;gene-LOC100817507;gene-LOC100809798;gene-LOC100818476;gene-LOC100812643;gene-LOC102664482;gene-LOC100809628;gene-LOC100789791;gene-LOC100804027
GO:0008144	drug binding	Molecular Function	11	44	1	0.714181	gene-LOC100500682;gene-LOC100804158;gene-GMAFB3B;gene-LOC100527623;gene-LOC100805150;gene-LOC100780156;gene-GF14A;gene-LOC100807836;gene-LOC100810796;gene-LOC100306535;gene-LOC100784482
GO:0018024	histone-lysine N-methyltransferase activity	Molecular Function	11	44	1	0.714181	gene-LOC100812173;gene-LOC100800651;gene-LOC100778335;gene-LOC100802372;gene-LOC100805932;Glycine_max_newGene_9409;gene-LOC100795584;gene-LOC100778316;gene-LOC100808183;Glycine_max_newGene_7322;gene-LOC100815492
GO:0015267	channel activity	Molecular Function	13	52	1	0.722587	gene-LOC100795261;gene-LOC100813448;gene-LOC100815637;gene-LOC100809467;gene-LOC100527333;gene-LOC732581;gene-LOC100803259;gene-LOC100306092;gene-LOC100792787;gene-LOC100793258;gene-N-26;gene-PIP2;gene-LOC100782155
GO:0043169	cation binding	Molecular Function	14	56	1	0.726715	gene-LOC100814445;gene-LOC100804887;gene-LOC100500682;gene-LOC100804158;Glycine_max_newGene_10967;gene-LOC100305854;gene-GMMT3;gene-LOC100786292;gene-GMGLYII-12;gene-LOC100306535;gene-LOC100803851;gene-LOC100816963;gene-LOC100797982;gene-LOC100527623
GO:0003899	DNA-directed 5'-3' RNA polymerase activity	Molecular Function	20	79	1	0.728102	gene-LOC100801412;gene-LOC100806190;gene-LOC100527000;gene-LOC100792565;gene-LOC100815934;gene-LOC100500450;gene-LOC100499860;gene-LOC100796185;gene-LOC100527862;gene-LOC100305979;gene-LOC100526941;gene-LOC100779425;gene-LOC100306033;gene-LOC100807892;gene-LOC100775415;gene-LOC100779047;Glycine_max_newGene_9403;gene-LOC100500417;gene-LOC100816388;gene-LOC100815164
GO:0071933	Arp2/3 complex binding	Molecular Function	1	4	1	0.728286	gene-LOC100775755
GO:0016307	phosphatidylinositol phosphate kinase activity	Molecular Function	1	4	1	0.728286	gene-LOC100779147
GO:0005457	GDP-fucose transmembrane transporter activity	Molecular Function	1	4	1	0.728286	gene-LOC100799112
GO:0004482	mRNA (guanine-N7-)-methyltransferase activity	Molecular Function	1	4	1	0.728286	gene-LOC100810904
GO:0050265	RNA uridylyltransferase activity	Molecular Function	1	4	1	0.728286	gene-LOC100800950
GO:0004747	ribokinase activity	Molecular Function	1	4	1	0.728286	gene-LOC100787958
GO:0008186	RNA-dependent ATPase activity	Molecular Function	1	4	1	0.728286	gene-LOC100785831
GO:0000048	peptidyltransferase activity	Molecular Function	1	4	1	0.728286	gene-LOC100797040
GO:0004150	dihydroneopterin aldolase activity	Molecular Function	1	4	1	0.728286	gene-LOC100526908
GO:0004828	serine-tRNA ligase activity	Molecular Function	1	4	1	0.728286	gene-LOC100809150
GO:0015180	L-alanine transmembrane transporter activity	Molecular Function	1	4	1	0.728286	gene-LOC100795501
GO:0008798	beta-aspartyl-peptidase activity	Molecular Function	1	4	1	0.728286	gene-LOC100803038
GO:0045300	acyl-[acyl-carrier-protein] desaturase activity	Molecular Function	1	4	1	0.728286	gene-SAD2
GO:0004860	protein kinase inhibitor activity	Molecular Function	1	4	1	0.728286	gene-LOC100820330
GO:0097157	pre-mRNA intronic binding	Molecular Function	1	4	1	0.728286	gene-LOC100814307
GO:0004418	hydroxymethylbilane synthase activity	Molecular Function	1	4	1	0.728286	gene-LOC100818391
GO:0047734	CDP-glycerol diphosphatase activity	Molecular Function	1	4	1	0.728286	gene-LOC100792911
GO:0005542	folic acid binding	Molecular Function	1	4	1	0.728286	gene-LOC100499724
GO:0004829	threonine-tRNA ligase activity	Molecular Function	1	4	1	0.728286	gene-LOC100802879
GO:0050839	cell adhesion molecule binding	Molecular Function	1	4	1	0.728286	gene-LOC100818162
GO:0004004	ATP-dependent RNA helicase activity	Molecular Function	1	4	1	0.728286	gene-LOC100785831
GO:0103067	4alpha-carboxy-5alpha-cholesta-8-en-3beta-ol:NAD(P)+ 3-dehydrogenase (decarboxylating) activity	Molecular Function	1	4	1	0.728286	gene-LOC100815785
GO:0015181	arginine transmembrane transporter activity	Molecular Function	1	4	1	0.728286	gene-LOC100795501
GO:0008514	organic anion transmembrane transporter activity	Molecular Function	1	4	1	0.728286	gene-LOC100499736
GO:0080048	GDP-D-glucose phosphorylase activity	Molecular Function	1	4	1	0.728286	gene-LOC100806541
GO:0002094	polyprenyltransferase activity	Molecular Function	1	4	1	0.728286	gene-LOC100794720
GO:0004396	hexokinase activity	Molecular Function	1	4	1	0.728286	gene-LOC100782127
GO:0003977	UDP-N-acetylglucosamine diphosphorylase activity	Molecular Function	1	4	1	0.728286	gene-LOC100798881
GO:0009703	nitrate reductase (NADH) activity	Molecular Function	1	4	1	0.728286	gene-INR2
GO:0045296	cadherin binding	Molecular Function	1	4	1	0.728286	gene-LOC100818162
GO:0004564	beta-fructofuranosidase activity	Molecular Function	1	4	1	0.728286	gene-LOC100777487
GO:0043546	molybdopterin cofactor binding	Molecular Function	1	4	1	0.728286	gene-INR2
GO:0103066	4alpha-carboxy-4beta-methyl-5alpha-cholesta-8-en-3beta-ol:NAD(P)+ 3-oxidoreductase (decarboxylating) activity	Molecular Function	1	4	1	0.728286	gene-LOC100815785
GO:0050464	nitrate reductase (NADPH) activity	Molecular Function	1	4	1	0.728286	gene-INR2
GO:0034480	phosphatidylcholine phospholipase C activity	Molecular Function	1	4	1	0.728286	gene-LOC100816313
GO:0047012	sterol-4-alpha-carboxylate 3-dehydrogenase (decarboxylating) activity	Molecular Function	1	4	1	0.728286	gene-LOC100815785
GO:0004161	dimethylallyltranstransferase activity	Molecular Function	1	4	1	0.728286	gene-LOC100802347
GO:0016866	intramolecular transferase activity	Molecular Function	1	4	1	0.728286	gene-LOC100797033
GO:0004067	asparaginase activity	Molecular Function	1	4	1	0.728286	gene-LOC100803038
GO:0034237	protein kinase A regulatory subunit binding	Molecular Function	1	4	1	0.728286	gene-LOC100775755
GO:0046422	violaxanthin de-epoxidase activity	Molecular Function	1	4	1	0.728286	gene-LOC100778118
GO:0005342	organic acid transmembrane transporter activity	Molecular Function	1	4	1	0.728286	gene-LOC100499736
GO:0000252	C-3 sterol dehydrogenase (C-4 sterol decarboxylase) activity	Molecular Function	1	4	1	0.728286	gene-LOC100815785
GO:0004853	uroporphyrinogen decarboxylase activity	Molecular Function	1	4	1	0.728286	gene-LOC100800753
GO:0016889	endodeoxyribonuclease activity, producing 3'-phosphomonoesters	Molecular Function	1	4	1	0.728286	gene-LOC100782577
GO:0030366	molybdopterin synthase activity	Molecular Function	1	4	1	0.728286	gene-LOC100786918
GO:0019784	NEDD8-specific protease activity	Molecular Function	1	4	1	0.728286	gene-LOC100803170
GO:0004830	tryptophan-tRNA ligase activity	Molecular Function	1	4	1	0.728286	gene-LOC100780447
GO:0019904	protein domain specific binding	Molecular Function	1	4	1	0.728286	gene-LOC100499736
GO:0046943	carboxylic acid transmembrane transporter activity	Molecular Function	1	4	1	0.728286	gene-LOC100499736
GO:0030620	U2 snRNA binding	Molecular Function	1	4	1	0.728286	gene-LOC100806980
GO:0000150	recombinase activity	Molecular Function	1	4	1	0.728286	gene-LOC100820307
GO:0102293	pheophytinase b activity	Molecular Function	1	4	1	0.728286	gene-LOC100790901
GO:0031071	cysteine desulfurase activity	Molecular Function	1	4	1	0.728286	gene-LOC100799615
GO:0033947	mannosylglycoprotein endo-beta-mannosidase activity	Molecular Function	1	4	1	0.728286	gene-LOC100809140
GO:0004622	lysophospholipase activity	Molecular Function	1	4	1	0.728286	gene-LOC100804027
GO:0008509	anion transmembrane transporter activity	Molecular Function	1	4	1	0.728286	gene-LOC100499736
GO:0045174	glutathione dehydrogenase (ascorbate) activity	Molecular Function	1	4	1	0.728286	gene-DHAR4
GO:0008253	5'-nucleotidase activity	Molecular Function	4	17	1	0.738178	gene-LOC100815584;gene-LOC100810501;gene-LOC100792340;gene-LOC100815862
GO:0070628	proteasome binding	Molecular Function	4	17	1	0.738178	gene-LOC100814812;gene-LOC100804038;gene-LOC100789980;gene-LOC100778187
GO:0019200	carbohydrate kinase activity	Molecular Function	4	17	1	0.738178	gene-LOC100803713;gene-LOC100780082;gene-LOC100802869;gene-LOC100814192
GO:0016799	hydrolase activity, hydrolyzing N-glycosyl compounds	Molecular Function	4	17	1	0.738178	gene-LOC100819644;gene-LOC100787563;gene-LOC100818908;gene-LOC100815735
GO:0000036	ACP phosphopantetheine attachment site binding involved in fatty acid biosynthetic process	Molecular Function	3	13	1	0.745525	gene-LOC100527750;gene-LOC100795986;gene-LOC100499669
GO:0046592	polyamine oxidase activity	Molecular Function	3	13	1	0.745525	gene-LOC100799631;gene-LOC100811255;gene-LOC100785056
GO:0047631	ADP-ribose diphosphatase activity	Molecular Function	3	13	1	0.745525	gene-LOC100792911;gene-LOC100819062;gene-LOC100777180
GO:0019158	mannokinase activity	Molecular Function	3	13	1	0.745525	gene-LOC100783175;gene-LOC100817266;gene-LOC100808324
GO:0035639	purine ribonucleoside triphosphate binding	Molecular Function	3	13	1	0.745525	gene-GF14A;gene-LOC100780156;gene-LOC100805150
GO:0004340	glucokinase activity	Molecular Function	3	13	1	0.745525	gene-LOC100783175;gene-LOC100817266;gene-LOC100808324
GO:0046873	metal ion transmembrane transporter activity	Molecular Function	3	13	1	0.745525	gene-GMNRAMP6B;gene-LOC100785207;gene-LOC100786634
GO:0005516	calmodulin binding	Molecular Function	44	171	1	0.753139	gene-LOC100807672;gene-LOC100790745;gene-LOC100790157;gene-LOC100804484;gene-LOC100803631;gene-LOC100783922;gene-LOC100791934;gene-LOC100794478;gene-LOC100794073;gene-LOC102665166;gene-GT-2B;Glycine_max_newGene_3979;gene-LOC100808399;gene-LOC100801746;gene-LOC100814609;gene-LOC100793156;gene-LOC100805954;gene-LOC100777845;gene-LOC100803313;gene-LOC100814445;gene-LOC100801868;gene-LOC100812605;gen…
GO:1990269	RNA polymerase II C-terminal domain phosphoserine binding	Molecular Function	2	9	1	0.76198	gene-LOC100811424;gene-LOC100818650
GO:0003883	CTP synthase activity	Molecular Function	2	9	1	0.76198	gene-LOC100805857;gene-LOC100819563
GO:0004084	branched-chain-amino-acid transaminase activity	Molecular Function	2	9	1	0.76198	gene-LOC100798871;gene-LOC100794026
GO:0003871	5-methyltetrahydropteroyltriglutamate-homocysteine S-methyltransferase activity	Molecular Function	2	9	1	0.76198	gene-LOC100802039;gene-LOC547643
GO:0004617	phosphoglycerate dehydrogenase activity	Molecular Function	2	9	1	0.76198	gene-LOC100793819;gene-LOC100817949
GO:0070034	telomerase RNA binding	Molecular Function	2	9	1	0.76198	gene-LOC100306376;gene-LOC100500467
GO:0004792	thiosulfate sulfurtransferase activity	Molecular Function	2	9	1	0.76198	gene-LOC100798053;gene-LOC100796802
GO:0008441	3'(2'),5'-bisphosphate nucleotidase activity	Molecular Function	2	9	1	0.76198	gene-LOC100780695;gene-LOC100796038
GO:0015189	L-lysine transmembrane transporter activity	Molecular Function	2	9	1	0.76198	gene-LOC100795501;gene-LOC100794163
GO:0070569	uridylyltransferase activity	Molecular Function	2	9	1	0.76198	gene-USP1;gene-LOC100798881
GO:0016835	carbon-oxygen lyase activity	Molecular Function	2	9	1	0.76198	gene-LOC100791599;Glycine_max_newGene_2371
GO:0004175	endopeptidase activity	Molecular Function	18	73	1	0.764647	gene-LOC100780823;gene-LOC100795748;gene-LOC100527630;gene-LOC100796147;gene-LOC100306148;gene-LOC100778498;gene-LOC100804192;gene-LOC100527174;gene-LOC100812955;gene-LOC100799919;gene-LOC100819051;gene-LOC100792921;gene-LOC100779190;gene-LOC100799010;gene-LOC100790481;gene-LOC100786457;gene-LOC100306084;gene-LOC100808731
GO:0030695	GTPase regulator activity	Molecular Function	7	30	1	0.769023	gene-LOC100306214;gene-LOC100804956;gene-LOC100779624;gene-LOC100793557;gene-LOC100788395;Glycine_max_newGene_9129;gene-LOC100499880
GO:0001228	transcriptional activator activity, RNA polymerase II transcription regulatory region sequence-specific binding	Molecular Function	12	50	1	0.772655	gene-LOC100807570;gene-LOC100819319;gene-LOC100806899;gene-LOC100797486;gene-LOC100786555;gene-LOC100802121;gene-LOC100777095;gene-LOC100807286;gene-LOC100809107;gene-LOC100806379;gene-LOC100781299;gene-LOC100803374
GO:0031624	ubiquitin conjugating enzyme binding	Molecular Function	5	22	1	0.774247	gene-LOC100791241;gene-LOC100527072;gene-LOC100500662;gene-LOC100793907;gene-ARI2
GO:0016836	hydro-lyase activity	Molecular Function	5	22	1	0.774247	Glycine_max_newGene_2371;gene-LOC100806689;gene-LOC100817945;gene-LOC100809737;gene-LOC100791599
GO:0005381	iron ion transmembrane transporter activity	Molecular Function	5	22	1	0.774247	gene-LOC100802640;gene-LOC100793585;gene-LOC100800852;gene-LOC100802179;gene-LOC100814227
GO:0004491	methylmalonate-semialdehyde dehydrogenase (acylating) activity	Molecular Function	4	18	1	0.780667	gene-LOC100791508;gene-LOC100811544;gene-LOC100796803;gene-LOC100783569
GO:0015171	amino acid transmembrane transporter activity	Molecular Function	25	101	1	0.785166	gene-LOC100811241;gene-LOC100791940;gene-LOC100500168;gene-LOC100816431;gene-LOC100796140;gene-LOC100816464;gene-LOC100806335;gene-GMLAX2;gene-LOC100794163;gene-GMLAX10;gene-GMLAX8;gene-GMLAX14;gene-LOC100794031;gene-LOC106795184;gene-LOC100795222;gene-GMLAX12;gene-GMLAX13;gene-LOC100804988;gene-LOC100777963;gene-LOC100305659;gene-LOC100808144;gene-LOC100499736;gene-GMLAX11;gene-GMLAX6;gene-LOC10…
GO:0008409	5'-3' exonuclease activity	Molecular Function	3	14	1	0.792104	gene-LOC100792878;gene-LOC100793881;gene-LOC100808044
GO:0015385	sodium:proton antiporter activity	Molecular Function	3	14	1	0.792104	gene-LOC100816746;gene-GMNHX1;gene-LOC100813332
GO:0003747	translation release factor activity	Molecular Function	3	14	1	0.792104	gene-LOC100789553;gene-LOC100784358;gene-LOC106796341
GO:0003746	translation elongation factor activity	Molecular Function	13	55	1	0.797756	gene-LOC100305510;gene-EF1BGAMMA3;gene-LOC113001159;gene-LOC100785429;gene-LOC100499878;gene-LOC100305991;gene-LOC100795680;gene-LOC100810452;gene-EF1BGAMMA4;gene-LOC100805422;gene-LOC100306659;gene-LOC100801611;gene-LOC100499632
GO:0042803	protein homodimerization activity	Molecular Function	14	59	1	0.798894	gene-HGS;gene-LOC100799344;gene-LOC100788594;gene-LOC100793455;gene-LOC100809558;gene-LOC100499736;gene-LOC100809510;gene-LOC100813103;gene-LOC100799188;gene-LOC100785547;gene-LOC100781893;gene-LOC100305714;gene-LOC100813245;gene-LOC100809369
GO:0009982	pseudouridine synthase activity	Molecular Function	7	31	1	0.799707	gene-LOC100795469;gene-LOC100789957;gene-LOC100790926;gene-LOC100806355;gene-LOC100802586;gene-LOC100799818;gene-LOC100810058
GO:0004620	phospholipase activity	Molecular Function	7	31	1	0.799707	gene-LOC100784706;gene-LOC100802647;gene-LOC100819994;gene-LOC100788345;gene-LOC100806573;gene-LOC100778940;gene-LOC100819591
GO:0016905	myosin heavy chain kinase activity	Molecular Function	1	5	1	0.803832	gene-LOC100805150
GO:0052906	tRNA (guanine(37)-N(1))-methyltransferase activity	Molecular Function	1	5	1	0.803832	gene-LOC100812740
GO:0008026	ATP-dependent helicase activity	Molecular Function	1	5	1	0.803832	gene-LOC100785831
GO:0036374	glutathione hydrolase activity	Molecular Function	1	5	1	0.803832	gene-LOC100797040
GO:0042586	peptide deformylase activity	Molecular Function	1	5	1	0.803832	gene-LOC100784292
GO:0103025	alpha-amylase activity (releasing maltohexaose)	Molecular Function	1	5	1	0.803832	gene-LOC100815664
GO:0003934	GTP cyclohydrolase I activity	Molecular Function	1	5	1	0.803832	gene-LOC100783814
GO:0008565	protein transporter activity	Molecular Function	1	5	1	0.803832	Glycine_max_newGene_3063
GO:0008821	crossover junction endodeoxyribonuclease activity	Molecular Function	1	5	1	0.803832	gene-LOC100788794
GO:0000095	S-adenosyl-L-methionine transmembrane transporter activity	Molecular Function	1	5	1	0.803832	gene-LOC100799825
GO:0070042	rRNA (uridine-N3-)-methyltransferase activity	Molecular Function	1	5	1	0.803832	gene-LOC100810848
GO:0009383	rRNA (cytosine-C5-)-methyltransferase activity	Molecular Function	1	5	1	0.803832	gene-LOC100807160
GO:0001012	RNA polymerase II regulatory region DNA binding	Molecular Function	1	5	1	0.803832	gene-LOC102664297
GO:0004683	calmodulin-dependent protein kinase activity	Molecular Function	1	5	1	0.803832	gene-LOC100805150
GO:0004930	G-protein coupled receptor activity	Molecular Function	1	5	1	0.803832	gene-LOC100797159
GO:0003844	1,4-alpha-glucan branching enzyme activity	Molecular Function	1	5	1	0.803832	gene-LOC100816963
GO:0016971	flavin-linked sulfhydryl oxidase activity	Molecular Function	1	5	1	0.803832	gene-LOC100782995
GO:0004352	glutamate dehydrogenase (NAD+) activity	Molecular Function	1	5	1	0.803832	gene-GDH2
GO:0003906	DNA-(apurinic or apyrimidinic site) lyase activity	Molecular Function	1	5	1	0.803832	gene-LOC100817167
GO:0003986	acetyl-CoA hydrolase activity	Molecular Function	1	5	1	0.803832	gene-LOC100802086
GO:0070035	purine NTP-dependent helicase activity	Molecular Function	1	5	1	0.803832	gene-LOC100785831
GO:0004823	leucine-tRNA ligase activity	Molecular Function	1	5	1	0.803832	Glycine_max_newGene_7591
GO:0004105	choline-phosphate cytidylyltransferase activity	Molecular Function	1	5	1	0.803832	gene-LOC100803699
GO:0004126	cytidine deaminase activity	Molecular Function	1	5	1	0.803832	gene-LOC100795350
GO:0030785	[ribulose-bisphosphate carboxylase]-lysine N-methyltransferase activity	Molecular Function	1	5	1	0.803832	gene-LOC100802221
GO:0004825	methionine-tRNA ligase activity	Molecular Function	1	5	1	0.803832	gene-LOC100814644
GO:0002020	protease binding	Molecular Function	1	5	1	0.803832	gene-LOC100814445
GO:0004831	tyrosine-tRNA ligase activity	Molecular Function	1	5	1	0.803832	gene-LOC100813016
GO:0046906	tetrapyrrole binding	Molecular Function	1	5	1	0.803832	gene-LOC100782053
GO:0004455	ketol-acid reductoisomerase activity	Molecular Function	1	5	1	0.803832	gene-LOC100789879
GO:0019213	deacetylase activity	Molecular Function	1	5	1	0.803832	gene-LOC100784468
GO:0008193	tRNA guanylyltransferase activity	Molecular Function	1	5	1	0.803832	gene-LOC100802539
GO:0030943	mitochondrion targeting sequence binding	Molecular Function	1	5	1	0.803832	gene-LOC100527715
GO:0050113	inositol oxygenase activity	Molecular Function	1	5	1	0.803832	gene-LOC100788665
GO:0050664	oxidoreductase activity, acting on NAD(P)H, oxygen as acceptor	Molecular Function	1	5	1	0.803832	gene-IFR2
GO:0016624	oxidoreductase activity, acting on the aldehyde or oxo group of donors, disulfide as acceptor	Molecular Function	1	5	1	0.803832	gene-LOC100779198
GO:0031406	carboxylic acid binding	Molecular Function	5	23	1	0.808775	gene-LOC100499700;gene-LOC100806283;gene-LOC100794729;gene-LOC100801859;gene-LOC100305501
GO:0043177	organic acid binding	Molecular Function	5	23	1	0.808775	gene-LOC100499700;gene-LOC100806283;gene-LOC100794729;gene-LOC100801859;gene-LOC100305501
GO:0000166	nucleotide binding	Molecular Function	21	87	1	0.810408	gene-LOC100809792;gene-GDH2;gene-LOC100780156;gene-LOC100804872;gene-LOC100804739;gene-LOC100037484;gene-LOC100793231;gene-LOC100775535;gene-LOC100804158;gene-LOC100807200;gene-LOC100805150;gene-GDH1;gene-GF14A;gene-LOC100814412;gene-LOC100306535;gene-LOC100775953;gene-POLD1;gene-LOC100527623;gene-LOC100817379;gene-LOC100305764;gene-LOC100500682
GO:0004559	alpha-mannosidase activity	Molecular Function	2	10	1	0.813344	gene-LOC100806647;gene-LOC100811858
GO:0004367	glycerol-3-phosphate dehydrogenase [NAD+] activity	Molecular Function	2	10	1	0.813344	gene-LOC100810871;gene-LOC100796897
GO:0004066	asparagine synthase (glutamine-hydrolyzing) activity	Molecular Function	2	10	1	0.813344	gene-LOC100797022;gene-AS2
GO:0008266	poly(U) RNA binding	Molecular Function	2	10	1	0.813344	gene-LOC100804671;gene-LOC100783163
GO:0032549	ribonucleoside binding	Molecular Function	2	10	1	0.813344	gene-LOC100815934;gene-LOC100779425
GO:0033293	monocarboxylic acid binding	Molecular Function	2	10	1	0.813344	gene-LOC100499700;gene-LOC100305501
GO:0003730	mRNA 3'-UTR binding	Molecular Function	2	10	1	0.813344	gene-LOC100783163;gene-LOC100804671
GO:0048365	Rac GTPase binding	Molecular Function	2	10	1	0.813344	gene-LOC100814483;gene-LOC100793380
GO:0016706	oxidoreductase activity, acting on paired donors, with incorporation or reduction of molecular oxygen, 2-oxoglutarate as one donor, and incorporation of one atom each of oxygen into both donors	Molecular Function	2	10	1	0.813344	gene-LOC100790934;gene-LOC100786655
GO:0010277	chlorophyllide a oxygenase [overall] activity	Molecular Function	2	10	1	0.813344	gene-LOC100800521;gene-LOC100818625
GO:0048037	cofactor binding	Molecular Function	2	10	1	0.813344	gene-LOC100775953;gene-LOC100807200
GO:0080025	phosphatidylinositol-3,5-bisphosphate binding	Molecular Function	2	10	1	0.813344	gene-LOC100781692;gene-LOC100817169
GO:0016297	acyl-[acyl-carrier-protein] hydrolase activity	Molecular Function	2	10	1	0.813344	gene-LOC100806931;gene-LOC100795986
GO:0005375	copper ion transmembrane transporter activity	Molecular Function	2	10	1	0.813344	gene-LOC100815028;gene-LOC100801036
GO:0004326	tetrahydrofolylpolyglutamate synthase activity	Molecular Function	2	10	1	0.813344	gene-LOC100811054;gene-LOC100810539
GO:0070008	serine-type exopeptidase activity	Molecular Function	2	10	1	0.813344	gene-LOC100812955;gene-LOC100779514
GO:0052861	glucan endo-1,3-beta-glucanase activity, C-3 substituted reducing group	Molecular Function	2	10	1	0.813344	gene-LOC100796721;gene-LOC100810004
GO:0047372	acylglycerol lipase activity	Molecular Function	4	19	1	0.817478	gene-LOC100809859;gene-LOC100802065;gene-LOC100802647;gene-LOC100793956
GO:0000155	phosphorelay sensor kinase activity	Molecular Function	8	36	1	0.823854	gene-LOC100781655;gene-LOC100789894;Glycine_max_newGene_10250;gene-LOC100776599;gene-LOC100802569;gene-LOC100802948;gene-LOC100794417;gene-LOC100787425
GO:0004045	aminoacyl-tRNA hydrolase activity	Molecular Function	3	15	1	0.831337	gene-LOC100527794;gene-LOC102664938;gene-LOC100820405
GO:0008235	metalloexopeptidase activity	Molecular Function	3	15	1	0.831337	Glycine_max_newGene_4068;gene-LOC100797187;Glycine_max_newGene_3307
GO:1901981	phosphatidylinositol phosphate binding	Molecular Function	3	15	1	0.831337	gene-LOC100804887;gene-LOC100803851;gene-LOC100817169
GO:0043138	3'-5' DNA helicase activity	Molecular Function	3	15	1	0.831337	gene-LOC100797777;gene-LOC100793222;gene-LOC100817635
GO:0004089	carbonate dehydratase activity	Molecular Function	7	33	1	0.851584	Glycine_max_newGene_8481;gene-LOC100803945;gene-LOC100782859;gene-LOC100810496;gene-LOC100811331;gene-LOC100500448;gene-LOC100781868
GO:0015292	uniporter activity	Molecular Function	2	11	1	0.854548	gene-LOC100809427;gene-LOC100814253
GO:0005227	calcium activated cation channel activity	Molecular Function	2	11	1	0.854548	gene-LOC100792963;gene-LOC100814561
GO:0045544	gibberellin 20-oxidase activity	Molecular Function	2	11	1	0.854548	gene-LOC100305378;gene-LOC100777224
GO:0043022	ribosome binding	Molecular Function	14	62	1	0.856258	gene-LOC100820330;gene-LOC100499632;gene-LOC100778205;gene-LOC100811808;gene-LOC100810278;gene-LOC100800412;gene-LOC100789856;gene-LOC100305991;gene-LOC100499836;gene-LOC113001159;gene-LOC100500688;Glycine_max_newGene_8832;gene-LOC547868;gene-LOC100305510
GO:0016829	lyase activity	Molecular Function	13	58	1	0.857012	gene-LOC100781666;gene-LOC100791599;gene-LOC100800811;gene-LOC100784395;gene-LOC100783041;gene-LOC100806463;gene-LOC100781016;Glycine_max_newGene_2371;gene-LOC100810335;gene-LOC100805930;gene-LOC100793110;gene-LOC100799111;gene-LOC106794266
GO:0031072	heat shock protein binding	Molecular Function	13	58	1	0.857012	gene-LOC100798567;gene-LOC100800435;gene-LOC100812707;gene-HOP1;gene-LOC547838;gene-GMBIP2;gene-LOC100790770;gene-LOC100803843;gene-LOC100795200;gene-LOC100787543;gene-GMBIP4;gene-LOC100789980;gene-LOC100777767
GO:0004521	endoribonuclease activity	Molecular Function	6	29	1	0.857299	gene-LOC100811968;gene-LOC102661527;gene-LOC100782011;gene-LOC100815624;gene-GMGLYII-12;gene-LOC100776523
GO:0005089	Rho guanyl-nucleotide exchange factor activity	Molecular Function	6	29	1	0.857299	gene-LOC100819455;gene-LOC100796692;gene-LOC100814278;gene-LOC100779636;gene-LOC100818685;gene-LOC100789706
GO:0071074	eukaryotic initiation factor eIF2 binding	Molecular Function	1	6	1	0.858376	gene-LOC100792481
GO:0004651	polynucleotide 5'-phosphatase activity	Molecular Function	1	6	1	0.858376	gene-LOC100803597
GO:0004813	alanine-tRNA ligase activity	Molecular Function	1	6	1	0.858376	gene-LOC100781401
GO:0044325	ion channel binding	Molecular Function	1	6	1	0.858376	gene-LOC100818162
GO:0034061	DNA polymerase activity	Molecular Function	1	6	1	0.858376	gene-LOC100782864
GO:0102721	ubiquinol:oxygen oxidoreductase activity	Molecular Function	1	6	1	0.858376	gene-LOC100807967
GO:0102078	methyl jasmonate methylesterase activity	Molecular Function	1	6	1	0.858376	gene-SABATH1
GO:0010279	indole-3-acetic acid amido synthetase activity	Molecular Function	1	6	1	0.858376	gene-LOC100791987
GO:0022843	voltage-gated cation channel activity	Molecular Function	1	6	1	0.858376	gene-LOC100802815
GO:0003922	GMP synthase (glutamine-hydrolyzing) activity	Molecular Function	1	6	1	0.858376	gene-LOC100808286
GO:0004827	proline-tRNA ligase activity	Molecular Function	1	6	1	0.858376	gene-LOC100812776
GO:0000014	single-stranded DNA endodeoxyribonuclease activity	Molecular Function	1	6	1	0.858376	gene-LOC100797086
GO:0004459	L-lactate dehydrogenase activity	Molecular Function	1	6	1	0.858376	gene-LOC100814897
GO:0009916	alternative oxidase activity	Molecular Function	1	6	1	0.858376	gene-LOC100807967
GO:0003935	GTP cyclohydrolase II activity	Molecular Function	1	6	1	0.858376	gene-LOC100791378
GO:0004090	carbonyl reductase (NADPH) activity	Molecular Function	1	6	1	0.858376	gene-LOC100790340
GO:0004363	glutathione synthase activity	Molecular Function	1	6	1	0.858376	gene-HGS
GO:0004484	mRNA guanylyltransferase activity	Molecular Function	1	6	1	0.858376	gene-LOC100803597
GO:0047918	GDP-mannose 3,5-epimerase activity	Molecular Function	1	6	1	0.858376	gene-LOC100794772
GO:0001006	RNA polymerase III type 3 promoter sequence-specific DNA binding	Molecular Function	1	6	1	0.858376	gene-LOC100793357
GO:0030795	jasmonate O-methyltransferase activity	Molecular Function	1	6	1	0.858376	gene-SABATH1
GO:0102499	SHG alpha-glucan phosphorylase activity	Molecular Function	1	6	1	0.858376	gene-LOC100807501
GO:0045156	electron transporter, transferring electrons within the cyclic electron transport pathway of photosynthesis activity	Molecular Function	1	6	1	0.858376	gene-LOC100499794
GO:0008184	glycogen phosphorylase activity	Molecular Function	1	6	1	0.858376	gene-LOC100807501
GO:0019888	protein phosphatase regulator activity	Molecular Function	10	46	1	0.861831	gene-LOC100809687;gene-LOC100814863;gene-LOC100814349;gene-LOC100792998;gene-LOC100789588;gene-LOC100802370;gene-LOC100808971;gene-LOC100798842;gene-LOC100781098;gene-LOC100803269
GO:0047617	acyl-CoA hydrolase activity	Molecular Function	3	16	1	0.864019	gene-LOC100805426;gene-LOC100818340;gene-LOC100802368
GO:0061659	ubiquitin-like protein ligase activity	Molecular Function	9	42	1	0.864644	gene-LOC100306398;gene-LOC100812552;Glycine_max_newGene_6530;gene-LOC100804887;gene-LOC100785742;gene-LOC100803851;gene-LOC100819907;gene-LOC100527864;gene-LOC100786109
GO:0008106	alcohol dehydrogenase (NADP+) activity	Molecular Function	5	25	1	0.865092	gene-LOC100786750;gene-LOC100776273;gene-LOC100809492;gene-LOC100806500;gene-LOC100809416
GO:0046914	transition metal ion binding	Molecular Function	7	34	1	0.87312	gene-LOC100305854;gene-LOC100804887;gene-GMGLYII-12;gene-LOC100803851;gene-LOC100804915;gene-GMMT3;gene-LOC100786292
GO:0051117	ATPase binding	Molecular Function	6	30	1	0.879369	gene-LOC100810062;gene-LOC100789588;gene-LOC100793301;gene-LOC100818038;gene-LOC100800799;gene-LOC100782585
GO:0004526	ribonuclease P activity	Molecular Function	2	12	1	0.887271	gene-LOC100776746;gene-LOC100786913
GO:0003910	DNA ligase (ATP) activity	Molecular Function	2	12	1	0.887271	gene-LOC100803989;gene-LOC100803597
GO:0003825	alpha,alpha-trehalose-phosphate synthase (UDP-forming) activity	Molecular Function	2	12	1	0.887271	gene-LOC100782799;gene-LOC100789554
GO:0019208	phosphatase regulator activity	Molecular Function	2	12	1	0.887271	gene-LOC100814493;gene-LOC100789588
GO:0008143	poly(A) binding	Molecular Function	2	12	1	0.887271	gene-LOC100804671;gene-LOC100783163
GO:0016279	protein-lysine N-methyltransferase activity	Molecular Function	3	17	1	0.890986	gene-LOC100777394;gene-LOC100797950;gene-LOC100777536
GO:0016879	ligase activity, forming carbon-nitrogen bonds	Molecular Function	1	7	1	0.897755	gene-LOC100808811
GO:0008686	3,4-dihydroxy-2-butanone-4-phosphate synthase activity	Molecular Function	1	7	1	0.897755	gene-LOC100791378
GO:0017116	single-stranded DNA-dependent ATP-dependent DNA helicase activity	Molecular Function	1	7	1	0.897755	gene-LOC100799257
GO:0004180	carboxypeptidase activity	Molecular Function	1	7	1	0.897755	gene-LOC100806486
GO:0051920	peroxiredoxin activity	Molecular Function	1	7	1	0.897755	gene-LOC100306216
GO:0003917	DNA topoisomerase type I activity	Molecular Function	1	7	1	0.897755	Glycine_max_newGene_5802
GO:0061575	cyclin-dependent protein serine/threonine kinase activator activity	Molecular Function	1	7	1	0.897755	gene-LOC100782957
GO:0004820	glycine-tRNA ligase activity	Molecular Function	1	7	1	0.897755	gene-LOC100810476
GO:0005047	signal recognition particle binding	Molecular Function	1	7	1	0.897755	gene-LOC100816486
GO:0047746	chlorophyllase activity	Molecular Function	1	7	1	0.897755	gene-LOC100790901
GO:0004612	phosphoenolpyruvate carboxykinase (ATP) activity	Molecular Function	1	7	1	0.897755	gene-LOC100781710
GO:0008176	tRNA (guanine-N7-)-methyltransferase activity	Molecular Function	1	7	1	0.897755	gene-LOC100789050
GO:0016405	CoA-ligase activity	Molecular Function	4	22	1	0.898418	gene-LOC100819192;gene-LOC100811418;gene-4CL2;gene-4CL1
GO:0003725	double-stranded RNA binding	Molecular Function	4	22	1	0.898418	gene-LOC100786762;gene-LOC100791087;gene-LOC100789591;gene-GMDCL3A
GO:0000993	RNA polymerase II core binding	Molecular Function	4	22	1	0.898418	gene-LOC100799341;gene-LOC100815709;gene-LOC100795054;gene-LOC100779773
GO:0060090	binding, bridging	Molecular Function	6	31	1	0.898487	gene-LOC100787573;gene-LOC100784648;gene-LOC100818162;gene-LOC100775346;gene-LOC100818647;gene-LOC100796048
GO:0030246	carbohydrate binding	Molecular Function	74	300	1	0.901218	gene-LOC100810362;gene-LOC100816729;gene-LOC547666;gene-LOC100789365;gene-LOC100785688;gene-LOC100779497;gene-LOC100807767;gene-LOC100777287;gene-LOC100811858;gene-LOC100815678;gene-LOC100787084;gene-LOC100796143;gene-LOC100798571;gene-LOC100808526;gene-LOC102668712;gene-LOC732598;gene-LOC100809690;gene-LOC100802518;gene-LOC100798450;gene-LOC100801138;gene-LOC100795997;gene-LOC100781853;gene-LOC1…
GO:0004177	aminopeptidase activity	Molecular Function	5	27	1	0.906729	gene-LOC100794040;gene-LOC100793450;gene-LOC100797187;Glycine_max_newGene_3307;Glycine_max_newGene_4068
GO:0044390	ubiquitin-like protein conjugating enzyme binding	Molecular Function	2	13	1	0.913043	gene-LOC100816864;gene-LOC100782827
GO:0043021	ribonucleoprotein complex binding	Molecular Function	3	18	1	0.913049	gene-LOC100801741;gene-LOC100785976;gene-LOC100791962
GO:0032454	histone demethylase activity (H3-K9 specific)	Molecular Function	3	18	1	0.913049	gene-LOC100787798;gene-LOC100810673;gene-LOC100805723
GO:0008061	chitin binding	Molecular Function	3	18	1	0.913049	gene-LOC100784482;gene-LOC100810796;gene-LOC100805955
GO:0043023	ribosomal large subunit binding	Molecular Function	3	18	1	0.913049	gene-LOC100500688;gene-LOC100814905;gene-LOC100500659
GO:0004499	N,N-dimethylaniline monooxygenase activity	Molecular Function	6	32	1	0.914944	gene-LOC100783371;gene-LOC100817010;gene-LOC100793203;gene-LOC100818066;gene-LOC100812619;gene-LOC100795136
GO:0016779	nucleotidyltransferase activity	Molecular Function	18	83	1	0.917173	gene-LOC100782864;gene-LOC100780801;gene-LOC100818016;gene-LOC100796540;gene-LOC100791087;gene-GMP1;gene-LOC100786399;gene-LOC100800950;gene-LOC100802262;gene-LOC100778409;gene-LOC100796401;gene-LOC100819900;gene-GMP2;gene-LOC100817201;gene-LOC100784894;Glycine_max_newGene_5029;gene-LOC100812996;gene-LOC100527248
GO:0010427	abscisic acid binding	Molecular Function	9	46	1	0.925526	gene-LOC100814569;gene-LOC100786749;gene-LOC100306381;gene-LOC100811185;gene-LOC100788576;gene-LOC100808820;gene-LOC100819216;gene-LOC100305867;gene-LOC100306363
GO:0004556	alpha-amylase activity	Molecular Function	1	8	1	0.926185	gene-LOC100815664
GO:0003876	AMP deaminase activity	Molecular Function	1	8	1	0.926185	gene-LOC100793831
GO:0030507	spectrin binding	Molecular Function	1	8	1	0.926185	gene-LOC100818162
GO:0022890	inorganic cation transmembrane transporter activity	Molecular Function	1	8	1	0.926185	gene-LOC100804998
GO:0019825	oxygen binding	Molecular Function	1	8	1	0.926185	gene-LOC100526931
GO:0016210	naringenin-chalcone synthase activity	Molecular Function	1	8	1	0.926185	gene-GMACHS1
GO:0016149	translation release factor activity, codon specific	Molecular Function	1	8	1	0.926185	gene-LOC100800412
GO:0004032	alditol:NADP+ 1-oxidoreductase activity	Molecular Function	3	19	1	0.930969	gene-LOC100806500;gene-LOC100786750;gene-LOC100809492
GO:0051020	GTPase binding	Molecular Function	3	19	1	0.930969	gene-LOC100793557;gene-LOC100786727;gene-LOC100804956
GO:0070006	metalloaminopeptidase activity	Molecular Function	2	14	1	0.9332	gene-LOC100810683;gene-LOC100790595
GO:0010011	auxin binding	Molecular Function	2	14	1	0.9332	gene-GMAFB3B;gene-LOC100807836
GO:0003684	damaged DNA binding	Molecular Function	17	81	1	0.935966	gene-LOC100775475;gene-LOC100816973;gene-LOC100780894;gene-LOC100811988;gene-LOC100801650;gene-LOC100794165;gene-LOC100808364;gene-LOC100778409;gene-LOC100797086;gene-LOC100817821;gene-LOC100527914;gene-LOC100811104;gene-LOC100819019;gene-LOC100818100;gene-LOC100806443;gene-LOC100804038;gene-LOC100778187
GO:0042910	xenobiotic transporter activity	Molecular Function	24	110	1	0.937364	gene-LOC100789487;gene-LOC100808206;gene-LOC100816310;gene-LOC100811871;gene-LOC100814869;gene-LOC100789080;gene-LOC100775619;gene-LOC100781278;gene-LOC100817098;gene-LOC100789611;gene-LOC100813142;gene-LOC100816863;gene-LOC100777237;gene-LOC100799559;gene-LOC100804083;gene-LOC100796603;gene-LOC100776083;gene-LOC100815319;gene-LOC100798432;gene-LOC100792588;gene-LOC100776126;gene-LOC100500204;gen…
GO:0008233	peptidase activity	Molecular Function	24	110	1	0.937364	gene-LOC100526911;gene-LOC100499792;gene-LOC100777545;gene-LOC100794836;gene-LOC100802336;gene-LOC100499705;gene-LOC100807772;gene-LOC100527361;gene-LOC100788818;gene-LOC100794023;gene-LOC100306631;gene-LOC100782864;gene-LOC100791675;gene-LOC100801319;gene-LOC100499695;gene-LOC100797100;gene-LOC100797553;gene-LOC100805764;gene-LOC100807064;gene-LOC100797179;gene-LOC100807010;gene-LOC100305648;gen…
GO:0031490	chromatin DNA binding	Molecular Function	6	34	1	0.941003	gene-LOC100787798;gene-LOC100306382;gene-LOC100792913;gene-LOC102660079;gene-LOC100805723;gene-LOC100810673
GO:0044212	transcription regulatory region DNA binding	Molecular Function	10	52	1	0.942374	gene-LOC102664297;gene-LOC100801868;gene-LOC100775305;gene-LOC100777133;gene-GT-2B;gene-LOC100791007;gene-LOC100795995;gene-LOC100794851;gene-LOC100791723;gene-LOC100788768
GO:0001067	regulatory region nucleic acid binding	Molecular Function	10	52	1	0.942374	gene-LOC100777133;gene-LOC100775305;gene-GT-2B;gene-LOC102664297;gene-LOC100801868;gene-LOC100795995;gene-LOC100791723;gene-LOC100794851;gene-LOC100788768;gene-LOC100791007
GO:0000049	tRNA binding	Molecular Function	10	52	1	0.942374	gene-LOC100787782;gene-LOC100810696;gene-LOC100810278;gene-LOC100786433;gene-LOC100791087;gene-LOC100779769;gene-LOC100794763;gene-LOC100499829;gene-LOC100785660;gene-LOC100791830
GO:0042626	ATPase activity, coupled to transmembrane movement of substances	Molecular Function	49	211	1	0.943466	gene-LOC100788651;Glycine_max_newGene_8317;gene-LOC100787093;gene-LOC102665974;gene-LOC100305477;gene-LOC100814859;gene-LOC100799773;gene-LOC100809399;gene-LOC100779975;gene-LOC100798588;gene-LOC100803731;gene-LOC100797529;gene-LOC100809752;gene-LOC100800295;gene-LOC100810688;gene-LOC100790550;gene-LOC100808752;gene-LOC100784041;gene-LOC100775951;gene-LOC100816389;gene-LOC100784336;gene-LOC100785…
GO:0008173	RNA methyltransferase activity	Molecular Function	3	20	1	0.945428	gene-LOC100816103;gene-GMHEN1A;gene-GMHEN1B
GO:0008083	growth factor activity	Molecular Function	4	25	1	0.945885	gene-PSK3;gene-LOC100781363;Glycine_max_newGene_8122;Glycine_max_newGene_2106
GO:0032977	membrane insertase activity	Molecular Function	1	9	1	0.946711	gene-LOC100787806
GO:0017150	tRNA dihydrouridine synthase activity	Molecular Function	1	9	1	0.946711	gene-LOC100783494
GO:0090353	polygalacturonase inhibitor activity	Molecular Function	1	9	1	0.946711	gene-LOC100783399
GO:0030145	manganese ion binding	Molecular Function	20	95	1	0.946894	Glycine_max_newGene_4068;gene-LOC100794734;gene-GMCUPIN10.3;gene-GMCUPIN10.4;gene-LOC100101896;gene-LOC100807659;gene-GMCUPIN19.12;Glycine_max_newGene_8195;gene-GMCUPIN15.3;gene-GMCUPIN20.2;gene-GMCUPIN19.15;gene-LOC100779397;gene-LOC100797187;gene-GMCUPIN02.3;gene-GMCUPIN20.1;gene-GMCUPIN07.5;gene-LOC100814665;gene-GMCUPIN17.1;gene-LOC100820155;Glycine_max_newGene_3307
GO:0061608	nuclear import signal receptor activity	Molecular Function	5	30	1	0.948115	gene-LOC100813320;gene-LOC100808498;gene-LOC100795806;gene-LOC100792804;gene-LOC100782992
GO:0031369	translation initiation factor binding	Molecular Function	2	15	1	0.948871	gene-LOC100786716;gene-LOC100784894
GO:0030544	Hsp70 protein binding	Molecular Function	2	15	1	0.948871	gene-LOC100789980;gene-LOC100795200
GO:0016740	transferase activity	Molecular Function	105	431	1	0.952838	Glycine_max_newGene_11279;gene-LOC100305756;gene-LOC100786152;gene-LOC100790800;gene-LOC100786109;gene-LOC100805974;gene-LOC100527526;gene-LOC100814445;gene-LOC100810687;gene-LOC100801047;gene-LOC100790397;gene-LOC100805150;gene-LOC100796332;gene-LOC100783492;gene-ACCA-2;gene-LOC100808483;gene-LOC100775914;gene-LOC100813136;gene-LOC100794002;gene-LOC100808286;gene-LOC100789324;gene-LOC100798321;g…
GO:0016881	acid-amino acid ligase activity	Molecular Function	4	26	1	0.956489	gene-LOC100791987;gene-LOC100776488;gene-LOC100777944;gene-LOC100808811
GO:0016765	transferase activity, transferring alkyl or aryl (other than methyl) groups	Molecular Function	4	26	1	0.956489	gene-VTE2-2;gene-LOC100797753;gene-LOC100796301;gene-LOC106794098
GO:0005315	inorganic phosphate transmembrane transporter activity	Molecular Function	3	21	1	0.957025	gene-LOC100787472;gene-LOC100785142;gene-LOC100787349
GO:0004867	serine-type endopeptidase inhibitor activity	Molecular Function	3	21	1	0.957025	gene-LOC100800076;gene-LOC100806180;gene-LOC100775287
GO:0017016	Ras GTPase binding	Molecular Function	2	16	1	0.960992	gene-LOC100793557;gene-LOC100804956
GO:0032266	phosphatidylinositol-3-phosphate binding	Molecular Function	2	16	1	0.960992	gene-LOC100781692;gene-LOC100817169
GO:0031267	small GTPase binding	Molecular Function	2	16	1	0.960992	gene-LOC100793557;gene-LOC100804956
GO:0016846	carbon-sulfur lyase activity	Molecular Function	2	16	1	0.960992	gene-LOC100790143;gene-LOC100812354
GO:0004812	aminoacyl-tRNA ligase activity	Molecular Function	1	10	1	0.96153	gene-LOC100802879
GO:0015318	inorganic solute uptake transmembrane transporter activity	Molecular Function	1	10	1	0.96153	gene-LOC100499736
GO:0015075	ion transmembrane transporter activity	Molecular Function	1	10	1	0.96153	gene-LOC100499736
GO:0005092	GDP-dissociation inhibitor activity	Molecular Function	1	10	1	0.96153	gene-LOC100792481
GO:0016707	gibberellin 3-beta-dioxygenase activity	Molecular Function	1	10	1	0.96153	gene-LOC100776755
GO:0004568	chitinase activity	Molecular Function	8	46	1	0.964677	gene-LOC100810929;gene-LOC100799642;gene-LOC100784482;gene-LOC100810796;gene-LOC100808683;gene-LOC100805300;gene-LOC100811072;gene-LOC100809617
GO:0019829	cation-transporting ATPase activity	Molecular Function	4	27	1	0.965143	gene-LOC100777143;gene-LOC100785768;gene-LOC100813841;gene-LOC100795153
GO:0004713	protein tyrosine kinase activity	Molecular Function	4	27	1	0.965143	gene-LOC100794353;gene-LOC547742;gene-LOC100814445;gene-LOC100779310
GO:0008320	protein transmembrane transporter activity	Molecular Function	3	22	1	0.966279	gene-LOC100527335;gene-LOC100527715;gene-LOC100776439
GO:0003712	transcription cofactor activity	Molecular Function	29	137	1	0.969335	gene-LOC100803634;gene-MYB70;gene-LOC100306257;gene-LOC100784573;gene-LOC100814774;gene-LOC100792913;gene-LOC100807120;Glycine_max_newGene_7778;gene-GAI1;gene-LOC100818057;gene-LOC100814493;gene-LOC100787821;gene-LOC100787657;gene-LOC100787225;gene-LOC102660079;gene-LOC100500095;gene-LOC100806535;gene-LOC100801593;gene-LOC100811746;gene-LOC100306332;gene-LOC100805870;gene-LOC100811740;gene-LOC100…
GO:0004864	protein phosphatase inhibitor activity	Molecular Function	10	56	1	0.969771	gene-LOC100819216;gene-LOC100305867;gene-LOC100306363;gene-LOC100788300;gene-LOC100814569;gene-LOC100786749;gene-LOC100306381;gene-LOC100811185;gene-LOC100788576;gene-LOC100808820
GO:0043178	alcohol binding	Molecular Function	2	17	1	0.970327	gene-GMAFB3B;gene-LOC100807836
GO:0000978	RNA polymerase II core promoter proximal region sequence-specific DNA binding	Molecular Function	21	104	1	0.970708	gene-LOC100784317;gene-LOC100779075;gene-LOC100810851;gene-GMNF-YA16;gene-LOC100781997;gene-LOC100803673;gene-GMNF-YC04;gene-LOC100812596;gene-LOC100776290;gene-LOC100500588;gene-LOC100790048;gene-LOC100801593;gene-GMNF-YA20;gene-LOC100781389;gene-GMDPB3-2;gene-LOC100803088;gene-LOC100808872;gene-LOC100787023;gene-GMNF-YA08;gene-GMNF-YA15;gene-GMHSF-07
GO:0016705	oxidoreductase activity, acting on paired donors, with incorporation or reduction of molecular oxygen	Molecular Function	57	251	1	0.971779	gene-CYP76O2;gene-LOC100795761;gene-LOC100820384;Glycine_max_newGene_1875;gene-CYP83E8;gene-CYP90A15;gene-LOC100812049;gene-LOC100786425;gene-LOC100820606;gene-LOC100813357;gene-LOC100818586;gene-LOC100818717;gene-LOC100805097;gene-CYP74A1;gene-LOC100808851;gene-LOC100804462;gene-LOC100816390;gene-LOC100781291;gene-LOC100792719;gene-LOC100805958;gene-LOC100526938;gene-LOC100784058;gene-LOC1008131…
GO:0080043	quercetin 3-O-glucosyltransferase activity	Molecular Function	5	33	1	0.972095	gene-LOC100790111;gene-LOC100790638;gene-LOC100803423;gene-LOC100792149;gene-LOC100805589
GO:0080044	quercetin 7-O-glucosyltransferase activity	Molecular Function	5	33	1	0.972095	gene-LOC100790111;gene-LOC100792149;gene-LOC100790638;gene-LOC100803423;gene-LOC100805589
GO:0016298	lipase activity	Molecular Function	5	33	1	0.972095	gene-LOC100818192;gene-LOC100810617;gene-LOC100803899;gene-LOC100785661;gene-LOC100776651
GO:0010436	carotenoid dioxygenase activity	Molecular Function	1	11	1	0.972228	gene-LOC100777875
GO:0019212	phosphatase inhibitor activity	Molecular Function	1	11	1	0.972228	gene-LOC100814493
GO:0004088	carbamoyl-phosphate synthase (glutamine-hydrolyzing) activity	Molecular Function	1	11	1	0.972228	gene-LOC100806168
GO:0035673	oligopeptide transmembrane transporter activity	Molecular Function	15	79	1	0.973511	gene-LOC100792167;gene-LOC100800628;gene-LOC100805115;gene-LOC100817739;gene-LOC100809846;gene-LOC100798301;gene-LOC100804235;gene-LOC100778345;gene-LOC102670258;gene-NRT1-3;gene-LOC100815154;gene-LOC100782611;gene-LOC100813385;gene-LOC100790191;gene-LOC100776720
GO:0061630	ubiquitin protein ligase activity	Molecular Function	49	220	1	0.97413	gene-LOC100783831;gene-LOC100800933;gene-LOC100803851;gene-LOC100819907;gene-ARI2;gene-LOC100798563;gene-LOC100500662;gene-LOC100794303;gene-LOC100788171;gene-LOC100813224;gene-LOC100804867;gene-LOC100782827;gene-LOC100787523;gene-LOC100786703;gene-LOC100803226;gene-LOC100527548;gene-LOC100527864;gene-LOC100807514;gene-LOC100802085;gene-LOC100806499;gene-LOC100789032;gene-LOC100527039;Glycine_max…
GO:0004857	enzyme inhibitor activity	Molecular Function	25	122	1	0.974628	gene-LOC100812756;gene-LOC100816686;gene-LOC100817885;gene-LOC100775597;gene-LOC100783399;gene-LOC100776623;gene-LOC100814493;gene-LOC100803842;gene-LOC100802145;gene-LOC100776969;gene-LOC100802601;gene-LOC100801813;gene-LOC100777646;gene-LOC100816503;gene-LOC100791033;gene-LOC100527116;gene-LOC100306461;gene-LOC100795394;gene-LOC100305900;gene-LOC102667165;gene-LOC100797734;gene-LOC100812251;gen…
GO:0005515	protein binding	Molecular Function	333	1307	1	0.974831	gene-LOC100807844;gene-LOC100804982;gene-LOC100800435;gene-LOC100808879;gene-LOC100795887;gene-LOC100803180;gene-LOC100799455;gene-LOC100804281;gene-LOC100797841;gene-LOC113002381;gene-GMIQD61;gene-LOC100796048;gene-LOC100785969;gene-LOC100305905;gene-LOC100782045;gene-LOC100797102;gene-LOC100798109;gene-LOC100781966;gene-LOC100306583;gene-LOC100797456;gene-LOC100815608;gene-GMIQD25;gene-LOC10052…
GO:0004185	serine-type carboxypeptidase activity	Molecular Function	36	168	1	0.975875	gene-LOC100797295;gene-LOC100794318;gene-LOC100799618;gene-LOC100789658;gene-LOC100798023;gene-LOC100815141;gene-LOC100783864;gene-LOC100805722;gene-LOC100805845;gene-LOC100812000;gene-LOC100819973;gene-LOC100796322;gene-LOC100805130;gene-LOC100805227;gene-LOC100792645;gene-LOC100798795;Glycine_max_newGene_5255;gene-LOC100783242;gene-LOC100796815;gene-LOC100790895;gene-LOC100807680;gene-LOC100801…
GO:0045735	nutrient reservoir activity	Molecular Function	18	93	1	0.976964	gene-GMCUPIN19.12;gene-LOC547820;gene-LOC100813415;gene-GMCUPIN15.3;gene-GMCUPIN10.3;gene-LOC100780895;gene-GMCUPIN10.4;gene-LOC547942;gene-LOC100789420;gene-GMCUPIN07.5;gene-VSPA;gene-GMCUPIN17.1;gene-GMCUPIN20.2;gene-GMCUPIN19.15;gene-LOC100775426;gene-GMCUPIN02.3;gene-GMCUPIN20.1;gene-LOC100795038
GO:0019139	cytokinin dehydrogenase activity	Molecular Function	2	18	1	0.977486	gene-LOC100790584;gene-LOC100816566
GO:0052692	raffinose alpha-galactosidase activity	Molecular Function	2	18	1	0.977486	gene-LOC100777954;gene-LOC100804290
GO:0003950	NAD+ ADP-ribosyltransferase activity	Molecular Function	2	18	1	0.977486	gene-LOC100815900;gene-LOC100814110
GO:0017056	structural constituent of nuclear pore	Molecular Function	6	39	1	0.97778	gene-LOC100782831;gene-LOC100777660;gene-LOC100817671;gene-LOC100776992;gene-LOC100794352;gene-LOC100783752
GO:0004402	histone acetyltransferase activity	Molecular Function	4	29	1	0.977853	gene-LOC100775247;gene-LOC100808905;gene-LOC100785655;gene-LOC100807120
GO:0016787	hydrolase activity	Molecular Function	250	998	1	0.978408	gene-LOC100794080;gene-LOC100787563;gene-LOC100787864;gene-LOC100791270;gene-LOC100810796;gene-LOC100801391;gene-LOC100778732;gene-LOC100794121;gene-LOC100797001;gene-LOC100785666;gene-LOC100796358;gene-LOC100305603;gene-LOC100786073;gene-LOC100808784;gene-LOC100798569;gene-LOC100792234;gene-LOC100811625;gene-LOC100804255;gene-LOC100794059;Glycine_max_newGene_10041;gene-LOC100811690;gene-LOC10079…
GO:0015299	solute:proton antiporter activity	Molecular Function	10	58	1	0.978463	gene-LOC100811871;gene-LOC100816510;gene-LOC100810302;gene-LOC100811030;gene-LOC100799476;gene-LOC100781515;gene-LOC100805993;gene-LOC100788884;gene-LOC100810155;gene-LOC100806734
GO:0071949	FAD binding	Molecular Function	23	115	1	0.978761	gene-LOC100778616;gene-LOC100813175;gene-INR2;gene-LOC100796809;gene-LOC100782093;gene-LOC100793515;gene-LOC100810829;gene-ACX1_1;gene-LOC100800519;gene-LOC100526948;gene-LOC100814521;gene-LOC100806810;gene-LOC100787671;gene-ZEP;gene-LOC100812604;gene-LOC100790584;gene-LOC100796276;gene-LOC100813706;gene-LOC100797464;gene-LOC100790765;gene-LOC100800978;gene-LOC100816566;gene-LOC100791799
GO:0004673	protein histidine kinase activity	Molecular Function	1	12	1	0.979951	gene-LOC100784427
GO:0004497	monooxygenase activity	Molecular Function	43	200	1	0.98294	gene-LOC100792360;gene-LOC100798970;gene-LOC547605;gene-LOC100779978;gene-C4H;gene-LOC100812443;gene-LOC100779120;gene-LOC100811080;gene-LOC100791555;gene-CYP98A2;Glycine_max_newGene_1967;gene-LOC100785815;gene-LOC100815135;gene-LOC100799906;Glycine_max_newGene_6973;gene-LOC100810890;gene-LOC100779012;gene-LOC100794277;gene-LOC100784395;gene-LOC100775886;gene-LOC100809563;gene-LOC100790480;gene-L…
GO:0042562	hormone binding	Molecular Function	2	19	1	0.982959	gene-LOC100807836;gene-GMAFB3B
GO:0004097	catechol oxidase activity	Molecular Function	2	19	1	0.982959	gene-LOC100037474;gene-LOC100792012
GO:0003678	DNA helicase activity	Molecular Function	24	121	1	0.983011	gene-LOC100811639;gene-LOC100801650;gene-LOC100809596;gene-LOC100813006;gene-LOC100804637;gene-LOC100797654;gene-LOC100787290;gene-LOC100808973;gene-LOC100800649;gene-LOC100775475;gene-LOC100779483;gene-LOC100791302;gene-LOC100819601;gene-LOC100799441;gene-LOC100779625;gene-LOC100802903;gene-LOC100811545;gene-LOC100806552;gene-LOC100782586;gene-LOC100779610;gene-LOC100805788;gene-LOC100794021;gen…
GO:0004601	peroxidase activity	Molecular Function	52	238	1	0.985102	gene-PRX2B;gene-LOC100812153;gene-LOC100784258;gene-LOC100814238;gene-LOC547872;gene-LOC100788562;gene-LOC102667724;gene-LOC100783115;gene-LOC100810392;gene-LOC100798603;gene-LOC100170727;gene-LOC100808271;gene-LOC100795192;gene-LOC100804350;gene-LOC100795412;gene-LOC100306570;gene-LOC100800915;gene-LOC100816459;gene-LOC100306295;gene-PRX2;gene-LOC100797313;gene-LOC100812342;Glycine_max_newGene_2…
GO:0016818	hydrolase activity, acting on acid anhydrides, in phosphorus-containing anhydrides	Molecular Function	5	36	1	0.985415	Glycine_max_newGene_3245;gene-LOC100793881;gene-LOC100794558;Glycine_max_newGene_4077;gene-LOC100785831
GO:0015333	peptide:proton symporter activity	Molecular Function	13	74	1	0.985438	gene-LOC100776720;gene-LOC100790191;gene-LOC100813385;gene-LOC100782611;gene-LOC100815154;gene-NRT1-3;gene-LOC102670258;gene-LOC100778345;gene-LOC100804235;gene-LOC100798301;gene-LOC100809846;gene-LOC100805115;gene-LOC100800628
GO:0038023	signaling receptor activity	Molecular Function	15	83	1	0.985478	gene-LOC100305867;gene-LOC100306363;gene-LOC100793320;gene-LOC100819216;gene-LOC100799310;gene-LOC100788576;gene-LOC100786749;gene-LOC100816825;gene-LOC100812261;gene-LOC100799912;gene-LOC100306381;gene-LOC100811185;gene-LOC100808820;gene-LOC100814594;gene-LOC100814569
GO:0004176	ATP-dependent peptidase activity	Molecular Function	7	46	1	0.985517	gene-LOC100816354;gene-LOC100818038;gene-LOC100802878;gene-LOC100796650;gene-LOC100782585;gene-LOC100798355;gene-LOC100791317
GO:0052381	tRNA dimethylallyltransferase activity	Molecular Function	1	13	1	0.985527	gene-LOC100817288
GO:0005094	Rho GDP-dissociation inhibitor activity	Molecular Function	1	13	1	0.985527	gene-LOC100793380
GO:0005546	phosphatidylinositol-4,5-bisphosphate binding	Molecular Function	3	26	1	0.987603	gene-LOC100779844;gene-LOC100784141;gene-LOC100799406
GO:1904680	peptide transmembrane transporter activity	Molecular Function	13	75	1	0.987634	gene-LOC100804235;gene-LOC100778345;gene-LOC100809846;gene-LOC100798301;gene-LOC100805115;gene-LOC100800628;gene-LOC100813385;gene-LOC100790191;gene-LOC100776720;gene-LOC100815154;gene-LOC100782611;gene-LOC102670258;gene-NRT1-3
GO:0010329	auxin efflux transmembrane transporter activity	Molecular Function	1	14	1	0.989552	gene-PIN3A
GO:0008146	sulfotransferase activity	Molecular Function	1	14	1	0.989552	gene-LOC100810026
GO:0019207	kinase regulator activity	Molecular Function	1	14	1	0.989552	gene-LOC100818156
GO:0015211	purine nucleoside transmembrane transporter activity	Molecular Function	2	21	1	0.990298	gene-LOC100799952;gene-LOC100796097
GO:0051213	dioxygenase activity	Molecular Function	40	193	1	0.990352	gene-LOC100786017;gene-LOC100793145;gene-LOC100802165;gene-LOC100802243;gene-LOC100805464;gene-LOC100790198;gene-LOC100810518;gene-LOC102659434;gene-LOC100777224;gene-LOC100802501;gene-LOC100812320;gene-LOC100817159;gene-LOC100789278;gene-LOC100776755;gene-LOC100820290;gene-LOC100810937;gene-LOC106795447;gene-LOC100820497;gene-F3H;gene-LOC100811774;gene-ANS3;gene-LOC100790594;gene-ANS2;gene-LOC10…
GO:0008139	nuclear localization sequence binding	Molecular Function	3	27	1	0.99041	gene-LOC100782992;gene-LOC100776992;gene-LOC100813320
GO:0019787	ubiquitin-like protein transferase activity	Molecular Function	37	181	1	0.990897	gene-LOC100790800;gene-LOC100809850;gene-LOC100786109;gene-LOC100805974;gene-LOC100788575;gene-LOC100786708;gene-LOC100813190;gene-LOC100306398;gene-LOC100778462;gene-LOC100780150;gene-LOC100800611;gene-LOC100815540;gene-LOC100779721;gene-LOC100818928;gene-LOC100808483;gene-LOC100818162;gene-LOC100794002;gene-LOC102669331;gene-LOC100812552;gene-LOC100789324;gene-LOC100527864;gene-LOC100784143;gen…
GO:0005506	iron ion binding	Molecular Function	121	519	1	0.991453	gene-SF3H1;Glycine_max_newGene_6973;gene-LOC100799906;gene-LOC100798201;gene-LOC100796794;gene-LOC100817944;gene-LOC100812204;gene-LOC100784395;gene-LOC100808862;gene-LOC100790183;gene-LOC100792360;gene-LOC100500592;gene-LOC100789929;gene-C4H;gene-LOC100306219;gene-LOC100796655;gene-LOC100807119;gene-LOC100778293;gene-SC-04;gene-LOC100791555;gene-FNSII-1;gene-LOC100795761;gene-LOC100788665;gene-L…
GO:0042578	phosphoric ester hydrolase activity	Molecular Function	6	44	1	0.992224	gene-LOC100800092;gene-LOC100780695;gene-LOC100786174;gene-LOC100796038;gene-LOC100814999;gene-LOC100789290
GO:0042162	telomeric DNA binding	Molecular Function	1	15	1	0.992458	gene-LOC100775475
GO:0060089	molecular transducer activity	Molecular Function	1	15	1	0.992458	gene-LOC100814594
GO:0004805	trehalose-phosphatase activity	Molecular Function	3	28	1	0.992599	gene-LOC100788641;gene-LOC100775207;gene-LOC100819495
GO:0032050	clathrin heavy chain binding	Molecular Function	3	28	1	0.992599	gene-LOC100799406;gene-LOC100813474;gene-LOC100820255
GO:0004016	adenylate cyclase activity	Molecular Function	2	22	1	0.9927	gene-LOC106794266;gene-LOC100783041
GO:0016849	phosphorus-oxygen lyase activity	Molecular Function	2	22	1	0.9927	gene-LOC106794266;gene-LOC100783041
GO:0008047	enzyme activator activity	Molecular Function	12	74	1	0.993327	gene-LOC100786833;gene-LOC100780081;gene-LOC100779624;gene-LOC100499880;gene-LOC100788395;gene-LOC100804956;gene-LOC100799257;gene-LOC100793557;gene-LOC100800435;gene-LOC100306214;gene-LOC100790770;Glycine_max_newGene_9129
GO:0034485	phosphatidylinositol-3,4,5-trisphosphate 5-phosphatase activity	Molecular Function	2	23	1	0.994516	gene-LOC100780455;gene-LOC100803074
GO:0004654	polyribonucleotide nucleotidyltransferase activity	Molecular Function	2	23	1	0.994516	gene-LOC102669209;gene-LOC100816982
GO:0004672	protein kinase activity	Molecular Function	246	1010	1	0.994558	gene-LOC100818955;gene-LOC100305392;gene-LOC102667237;gene-LOC100787014;gene-LOC100789785;gene-LOC102664172;gene-LOC100783988;gene-LOC100791455;gene-LOC100790292;gene-LOC100784503;gene-LOC100796593;gene-LOC100809700;gene-LOC100775768;gene-LOC100793033;gene-LOC100799267;gene-LOC100796658;gene-LOC100804210;gene-LOC100785707;gene-LOC100799090;gene-LOC100794428;gene-LOC100795964;gene-LOC102667471;gen…
GO:0000981	RNA polymerase II transcription factor activity, sequence-specific DNA binding	Molecular Function	30	156	1	0.994886	gene-LOC100787023;Glycine_max_newGene_5187;gene-LOC100790048;gene-LOC100811049;gene-LOC100805078;gene-LOC100785869;gene-LOC100797819;gene-LOC100781997;gene-LOC100789059;gene-LOC100786066;gene-LOC100805348;gene-LOC100784317;gene-LOC100776263;gene-LOC100784742;gene-LOC100803088;gene-LOC106799700;gene-LOC100808872;gene-LOC100811762;Glycine_max_newGene_4346;gene-LOC732595;gene-SEP1;gene-LOC100798351;…
GO:0005215	transporter activity	Molecular Function	5	41	1	0.995308	gene-LOC100499736;gene-LOC100783495;gene-LOC100785793;Glycine_max_newGene_3063;gene-LOC100797297
GO:0000977	RNA polymerase II regulatory region sequence-specific DNA binding	Molecular Function	43	212	1	0.995345	gene-LOC100784742;gene-LOC100808734;gene-LOC100809514;gene-LOC100776263;gene-LOC100782217;gene-LOC100813520;gene-LOC100805348;gene-LOC100786066;gene-MADS28;gene-LOC100790650;gene-LOC100789059;gene-LOC100785322;gene-AGL11;gene-LOC100499955;gene-AGL1L;gene-LOC100797819;gene-AGL3L;gene-LOC100785869;gene-LOC100811049;gene-LOC100805078;gene-LOC100782805;gene-LOC100788427;Glycine_max_newGene_5187;gene-…
GO:0010333	terpene synthase activity	Molecular Function	2	24	1	0.995887	gene-GMTPS21;gene-GMTPS2
GO:0008970	phosphatidylcholine 1-acylhydrolase activity	Molecular Function	1	17	1	0.99607	Glycine_max_newGene_3327
GO:0052634	C-19 gibberellin 2-beta-dioxygenase activity	Molecular Function	1	17	1	0.99607	gene-LOC100819163
GO:0004866	endopeptidase inhibitor activity	Molecular Function	5	42	1	0.996286	gene-LOC100305549;gene-LOC100500338;gene-LOC100305872;gene-LOC100500579;gene-LOC100306662
GO:0030234	enzyme regulator activity	Molecular Function	26	141	1	0.996307	gene-LOC100804956;gene-LOC100306214;gene-LOC100800435;gene-LOC100787034;gene-LOC100802145;gene-LOC100499808;gene-LOC100789588;gene-LOC100788395;gene-LOC100779667;gene-LOC100793557;gene-LOC100814379;gene-LOC100499915;gene-LOC100790770;Glycine_max_newGene_9129;gene-LOC100817941;gene-LOC100786362;gene-LOC100814493;gene-LOC100780081;gene-LOC100786833;gene-LOC100818156;gene-LOC100775597;gene-LOC100779…
GO:0046872	metal ion binding	Molecular Function	511	2023	1	0.996338	gene-LOC100500290;gene-LOC100810424;gene-LOC100801955;gene-LOC100815114;gene-LOC100305886;gene-LOC547873;Glycine_max_newGene_8755;gene-GMGLYI-11;gene-LOC100806129;gene-LOC100809054;gene-LOC100775247;gene-LOC100810882;gene-LOC100816262;gene-LOC100796737;gene-LOC100785687;gene-LOC100798754;gene-LOC100817563;gene-LOC100790276;gene-LOC100788208;gene-LOC100780373;Glycine_max_newGene_7643;gene-LOC10082…
GO:0005488	binding	Molecular Function	254	1049	1	0.996569	Glycine_max_newGene_5029;gene-LOC100499880;gene-LOC100794080;gene-LOC100775953;gene-HIR3;gene-LOC100306535;gene-LOC100788594;gene-LOC100792611;gene-LOC100786585;gene-LOC100797001;gene-GMIQD45;gene-LOC100792234;gene-LOC102668793;gene-LOC100788768;gene-LOC100793557;gene-LOC100781204;gene-LOC100809598;gene-LOC100800686;gene-GT-2B;gene-LOC100801859;gene-LOC100803526;gene-LOC100778274;gene-LOC10078072…
GO:0008080	N-acetyltransferase activity	Molecular Function	9	64	1	0.997155	gene-LOC100816118;gene-LOC100808330;gene-LOC100795889;gene-LOC100812509;gene-LOC100305894;gene-LOC100803930;gene-LOC100499961;gene-LOC100802268;gene-LOC100777440
GO:0042623	ATPase activity, coupled	Molecular Function	1	18	1	0.997163	gene-LOC100785831
GO:0000822	inositol hexakisphosphate binding	Molecular Function	2	26	1	0.997696	gene-LOC100807836;gene-GMAFB3B
GO:0009975	cyclase activity	Molecular Function	2	27	1	0.998279	gene-LOC100783041;gene-LOC106794266
GO:0004190	aspartic-type endopeptidase activity	Molecular Function	69	331	1	0.99855	gene-LOC100783933;gene-LOC100818365;gene-LOC100797345;gene-LOC100807884;gene-LOC100783051;gene-LOC100790299;gene-LOC100805927;gene-LOC100818868;gene-LOC100788179;gene-LOC100305604;gene-LOC100786631;gene-LOC100819698;Glycine_max_newGene_6929;gene-LOC100801598;gene-LOC100788618;gene-LOC100795803;gene-LOC100801186;gene-LOC100782139;gene-LOC100804147;gene-LOC100800576;gene-LOC100784561;gene-LOC100808…
GO:0003743	translation initiation factor activity	Molecular Function	28	157	1	0.998673	gene-LOC100801044;gene-LOC100798514;gene-LOC100786716;gene-LOC100499836;gene-LOC100305991;gene-LOC100499676;gene-LOC100781892;gene-LOC100819486;gene-LOC100784099;gene-LOC100817948;gene-LOC100780715;gene-LOC100781682;gene-LOC100809918;gene-LOC100499886;gene-LOC100499799;gene-LOC100786735;gene-LOC100810278;gene-LOC100777129;gene-LOC100781100;gene-LOC100816500;gene-LOC100798562;gene-LOC100305510;gen…
GO:0017111	nucleoside-triphosphatase activity	Molecular Function	2	28	1	0.998716	Glycine_max_newGene_4077;gene-LOC100785831
GO:0004386	helicase activity	Molecular Function	11	78	1	0.998722	gene-LOC100818326;gene-LOC100817948;gene-LOC100795142;gene-LOC100786735;gene-LOC100813857;gene-LOC100790809;gene-LOC100800969;gene-RTRP5;gene-LOC100785831;gene-LOC100811608;Glycine_max_newGene_5841
GO:0045330	aspartyl esterase activity	Molecular Function	21	128	1	0.999137	gene-LOC100776969;gene-LOC100777500;gene-LOC106796002;Glycine_max_newGene_887;gene-LOC100808236;gene-LOC100814987;gene-LOC100810031;gene-LOC100816503;gene-LOC100801231;gene-LOC100816190;gene-LOC100776752;gene-LOC100810565;gene-LOC100801813;gene-LOC100819675;gene-LOC100776623;gene-LOC100812756;gene-LOC100786786;gene-LOC100777646;gene-LOC100813592;gene-LOC100810741;gene-LOC102666380
GO:0046910	pectinesterase inhibitor activity	Molecular Function	13	90	1	0.99915	gene-LOC100776752;gene-LOC100810565;gene-LOC100777500;gene-LOC100819675;gene-LOC106796002;Glycine_max_newGene_887;gene-LOC100808236;gene-LOC100814987;gene-LOC100813592;gene-LOC100801231;gene-LOC100789567;gene-LOC102666380;gene-LOC100810741
GO:0005545	1-phosphatidylinositol binding	Molecular Function	2	30	1	0.999287	gene-LOC100799406;gene-LOC100800909
GO:0016462	pyrophosphatase activity	Molecular Function	2	30	1	0.999287	gene-LOC100785831;Glycine_max_newGene_4077
GO:0004439	phosphatidylinositol-4,5-bisphosphate 5-phosphatase activity	Molecular Function	2	30	1	0.999287	gene-LOC100780455;gene-LOC100803074
GO:0015276	ligand-gated ion channel activity	Molecular Function	3	37	1	0.999339	gene-LOC100799912;gene-LOC100793320;gene-LOC100812261
GO:0043621	protein self-association	Molecular Function	6	55	1	0.999364	gene-LOC100780960;gene-LOC100814445;gene-LOC100777398;gene-LOC100795465;gene-LOC100775932;gene-LOC100791007
GO:0017025	TBP-class protein binding	Molecular Function	1	23	1	0.999444	gene-LOC100796358
GO:0004532	exoribonuclease activity	Molecular Function	1	23	1	0.999444	gene-LOC100775932
GO:0004540	ribonuclease activity	Molecular Function	4	45	1	0.999583	gene-LOC100782864;gene-GMGLYII-12;gene-LOC100775932;gene-LOC100815140
GO:0000175	3'-5'-exoribonuclease activity	Molecular Function	5	51	1	0.999583	gene-LOC100784843;gene-LOC102669209;gene-LOC100804872;gene-LOC100783799;gene-LOC100816982
GO:0004674	protein serine/threonine kinase activity	Molecular Function	231	997	1	0.999673	gene-LOC100819882;gene-LOC100801071;gene-LOC100802574;gene-LOC100806762;gene-LOC100815648;gene-LOC100800873;gene-LOC100788046;gene-LOC100777214;Glycine_max_newGene_5612;gene-LOC100786097;gene-LOC100788245;gene-LOC100784109;gene-LOC100797153;gene-LOC100795006;gene-LOC100816028;gene-LOC100800465;gene-LOC100812828;gene-LOC100784786;gene-LOC100790304;gene-LOC100806839;gene-LOC100788746;gene-LOC100781…
GO:0016772	transferase activity, transferring phosphorus-containing groups	Molecular Function	7	64	1	0.999715	Glycine_max_newGene_5029;gene-LOC100805150;gene-LOC100801047;gene-LOC100782864;gene-LOC100814445;gene-LOC100794046;gene-LOC100797982
GO:0004527	exonuclease activity	Molecular Function	2	34	1	0.999783	gene-LOC100775932;gene-LOC100802793
GO:0061134	peptidase regulator activity	Molecular Function	2	34	1	0.999783	gene-LOC100775597;gene-LOC100802145
GO:0016817	hydrolase activity, acting on acid anhydrides	Molecular Function	2	35	1	0.999839	Glycine_max_newGene_4077;gene-LOC100785831
GO:0003964	RNA-directed DNA polymerase activity	Molecular Function	2	35	1	0.999839	gene-LOC100782864;gene-LOC100784683
GO:0030599	pectinesterase activity	Molecular Function	23	149	1	0.999878	gene-LOC100801231;gene-LOC100816503;gene-LOC100816190;gene-LOC100808236;gene-LOC100814987;gene-LOC100810031;Glycine_max_newGene_887;gene-LOC100777500;gene-LOC100776969;gene-LOC106796002;gene-LOC100777646;gene-LOC100813592;gene-LOC100786786;gene-LOC100305900;gene-LOC100789567;gene-LOC102666380;gene-LOC100810741;gene-LOC100812756;gene-LOC100776623;gene-LOC100776752;gene-LOC100810565;gene-LOC1008196…
GO:0008408	3'-5' exonuclease activity	Molecular Function	5	56	1	0.999883	gene-LOC100788577;gene-LOC100794813;Glycine_max_newGene_4372;gene-LOC100801291;gene-LOC100810019
GO:0016709	oxidoreductase activity, acting on paired donors, with incorporation or reduction of molecular oxygen, NAD(P)H as one donor, and incorporation of one atom of oxygen	Molecular Function	31	188	1	0.999906	gene-LOC100793538;gene-LOC100808862;gene-LOC100810391;gene-LOC100785686;gene-LOC100788826;gene-LOC100791502;gene-LOC100790231;gene-LOC100778293;gene-LOC100792065;gene-LOC100795683;gene-LOC100785241;gene-LOC100807448;gene-CYP82C1;gene-LOC100818985;gene-LOC100817944;gene-SF3H1;gene-LOC100783085;gene-LOC100785621;gene-LOC100797504;gene-LOC100812188;gene-LOC100791509;gene-CYP83D1;gene-CYP77A3;gene-LO…
GO:0003724	RNA helicase activity	Molecular Function	15	112	1	0.999918	gene-LOC100791017;gene-LOC100800861;gene-LOC100795756;gene-LOC100781743;gene-LOC100811664;gene-LOC100785831;gene-LOC100787545;gene-LOC100819984;gene-LOC100791226;gene-LOC102664148;gene-LOC100815635;gene-LOC100784557;gene-LOC100793807;gene-LOC100809918;gene-LOC100801402
GO:0008194	UDP-glycosyltransferase activity	Molecular Function	38	221	1	0.999921	gene-LOC100780552;gene-LOC100806926;gene-LOC100816809;gene-FG3;gene-LOC100777005;gene-UGT78K1;gene-LOC100801303;gene-LOC100783385;gene-LOC100807224;gene-LOC100789397;gene-LOC100819539;gene-LOC100800142;gene-LOC100820538;gene-LOC100783005;gene-LOC100812490;gene-LOC100796178;gene-LOC100810117;gene-LOC548026;gene-LOC100783479;gene-DGD2;gene-UGT708D1;gene-LOC100775704;gene-LOC100787088;gene-LOC100792…
GO:0000987	core promoter proximal region sequence-specific DNA binding	Molecular Function	1	30	1	0.999943	Glycine_max_newGene_5187
GO:0004842	ubiquitin-protein transferase activity	Molecular Function	90	454	1	0.999968	gene-LOC100815248;gene-LOC100817542;gene-LOC100788846;gene-LOC100818900;gene-LOC100805963;gene-LOC100527039;gene-LOC100815083;gene-LOC100805696;gene-LOC100799675;gene-LOC100797727;gene-LOC100799032;gene-LOC100820268;gene-LOC100793534;gene-LOC100804887;gene-LOC100805449;gene-LOC100819907;gene-LOC100797917;gene-LOC100803851;gene-LOC100809593;gene-LOC100794077;gene-LOC100808982;gene-LOC100790153;gen…
GO:0098772	molecular function regulator	Molecular Function	15	117	1	0.99997	gene-LOC100499880;gene-LOC100775597;gene-LOC100779624;gene-LOC100783399;gene-LOC100789588;gene-LOC100814493;gene-LOC100802145;gene-LOC100818156;Glycine_max_newGene_9129;gene-LOC100790770;gene-LOC100306214;gene-LOC100800435;gene-LOC100793557;gene-LOC100804956;gene-LOC100788395
GO:0043047	single-stranded telomeric DNA binding	Molecular Function	2	41	1	0.999974	Glycine_max_newGene_611;gene-LOC100808364
GO:0016504	peptidase activator activity	Molecular Function	1	34	1	0.999985	gene-LOC100814812
GO:0000976	transcription regulatory region sequence-specific DNA binding	Molecular Function	87	450	1	0.999989	gene-LOC100784918;gene-LOC100777595;gene-LOC112997715;gene-LOC100794429;gene-LOC100779121;gene-LOC100792103;gene-LOC100794765;gene-LOC100527659;gene-MYBJ2;Glycine_max_newGene_7729;gene-BZIP124;gene-LOC100810673;gene-LOC100805723;Glycine_max_newGene_642;gene-LOC100795995;gene-LOC100785810;gene-SEP1;gene-LOC100798351;gene-LOC100782733;gene-MYB48;gene-MYB56;gene-LOC100803634;gene-LOC778072;gene-LOC1…
GO:0030247	polysaccharide binding	Molecular Function	8	84	1	0.999991	gene-LOC102665570;gene-LOC100792611;gene-LOC100797001;gene-LOC100807714;gene-LOC100795997;gene-LOC100784078;gene-LOC100798027;gene-LOC100810240
GO:0097159	organic cyclic compound binding	Molecular Function	116	591	1	0.999999	gene-LOC100815140;gene-LOC100804739;gene-LOC100795995;gene-LOC100780160;gene-LOC106794266;gene-LOC100782864;Glycine_max_newGene_4077;gene-LOC100816463;gene-LOC100783580;gene-GMGLYII-12;gene-LOC100792116;gene-LOC100806111;gene-LOC100801994;gene-LOC100808101;gene-LOC100775781;gene-LOC100780156;gene-LOC100811988;Glycine_max_newGene_7028;gene-LOC100801868;gene-LOC100796128;gene-LOC100803889;gene-LOC1…
GO:1901363	heterocyclic compound binding	Molecular Function	115	588	1	0.999999	gene-LOC100796128;gene-LOC100801868;Glycine_max_newGene_7028;gene-LOC100811988;gene-LOC100780156;gene-LOC100808101;gene-LOC100809369;gene-LOC100799961;gene-LOC100810983;gene-LOC100803889;gene-LOC100782864;gene-LOC106794266;gene-LOC100780160;gene-LOC100804739;gene-LOC100795995;gene-LOC100815140;gene-LOC100801994;gene-LOC100806111;gene-LOC100792116;gene-GMGLYII-12;gene-LOC100816463;gene-LOC10078358…
GO:0020037	heme binding	Molecular Function	134	669	1	0.999999	gene-LOC100788562;gene-LOC100170727;gene-LOC100813357;gene-LOC102667724;gene-LOC100783115;gene-LOC100812153;gene-LOC100306380;gene-CYP77A3;gene-LOC100527821;gene-LOC100785414;gene-LOC100792719;gene-LOC100808851;gene-LOC100802238;gene-LOC100799504;gene-AOS2;gene-LOC100785621;gene-LOC100806101;gene-GMCB5-A2;gene-LOC100815640;gene-LOC100526931;gene-LOC100809563;gene-LOC100305937;gene-LOC100500015;ge…
GO:0008134	transcription factor binding	Molecular Function	19	154	1	0.999999	gene-LOC100811762;gene-LOC732595;gene-LOC100306277;gene-LOC100782733;gene-SEP1;gene-LOC100798351;gene-LOC100794429;gene-LOC100819817;gene-LOC100527659;Glycine_max_newGene_5187;gene-LOC100305481;gene-LOC100797819;gene-LOC100785869;gene-LOC100811049;gene-LOC100805078;gene-LOC100786066;gene-LOC100776263;gene-LOC100805348;gene-LOC100784742
GO:0043565	sequence-specific DNA binding	Molecular Function	242	1114	1	0.999999	Glycine_max_newGene_7729;gene-LOC100794429;gene-LOC100806193;gene-LOC100796545;gene-LOC100819817;gene-LOC100785004;gene-WRKY35;gene-LOC100812983;gene-LOC100784527;gene-LOC100798351;gene-BZIP86;gene-LOC100776805;gene-LOC100784742;gene-LOC100800360;gene-LOC100801785;gene-BZIP125;gene-WRKY31;gene-LOC100786449;gene-LOC100791723;gene-LOC100812605;gene-LOC100794400;gene-LOC100809244;gene-WRKY47;gene-LO…
GO:0016788	hydrolase activity, acting on ester bonds	Molecular Function	115	596	1	1	gene-LOC100806931;gene-LOC100802355;gene-LOC100779460;gene-LOC100780781;gene-LOC100790145;gene-LOC100777774;gene-LOC100815342;gene-LOC100794017;gene-LOC100780355;gene-LOC100801257;gene-LOC100786212;gene-LOC100818440;gene-LOC100777335;gene-LOC100800634;gene-LOC100808943;gene-LOC100792512;gene-LOC100790966;gene-LOC100783020;gene-LOC100786895;gene-LOC100790259;gene-LOC100813037;gene-LOC100820389;gen…
GO:0004069	L-aspartate:2-oxoglutarate aminotransferase activity	Molecular Function	2	54	1	1	gene-LOC547792;gene-LOC547813
GO:0003674	molecular_function	Molecular Function	352	1591	1	1	gene-LOC100527623;gene-LOC100809945;gene-LOC100795465;gene-LOC100777506;gene-LOC100781615;gene-LOC100775932;gene-LOC102664482;gene-LOC100799843;gene-LOC100778358;gene-LOC100802145;gene-LOC100809510;gene-LOC100306317;gene-LOC100813627;gene-LOC100812552;gene-LOC100797694;gene-LOC102669331;gene-LOC100818162;gene-LOC100787573;gene-GMIQD63;gene-LOC100813728;gene-LOC100781893;gene-LOC100499730;gene-LOC…
GO:0004519	endonuclease activity	Molecular Function	63	387	1	1	gene-LOC100797334;gene-LOC100816677;gene-LOC100803526;gene-LOC100818398;gene-LOC100794364;gene-LOC100778274;gene-LOC100806557;gene-LOC100809945;gene-LOC100776653;gene-LOC100812887;gene-LOC100778358;gene-LOC100775923;gene-LOC100800686;gene-LOC100797694;Glycine_max_newGene_10041;gene-LOC100818966;gene-LOC100786292;gene-LOC100776103;gene-LOC100800731;gene-LOC100781204;gene-LOC100815857;gene-LOC10081…
GO:0003824	catalytic activity	Molecular Function	232	1115	1	1	gene-LOC100800686;gene-LOC100778462;gene-LOC100306398;gene-LOC100813190;gene-LOC100499858;gene-LOC100800611;gene-LOC100776273;gene-LOC100775895;gene-LOC100778274;gene-LOC100792142;gene-LOC100803526;gene-LOC100805943;gene-LOC102667779;gene-LOC100788035;gene-LOC100792234;gene-LOC100797001;Glycine_max_newGene_5029;gene-LOC100794584;gene-LOC100794080;gene-DFR1;gene-LOC100787563;gene-LOC100781644;gene…
GO:0008237	metallopeptidase activity	Molecular Function	1	60	1	1	gene-AAH
GO:0008234	cysteine-type peptidase activity	Molecular Function	10	137	1	1	gene-LOC100790302;gene-LOC100783027;gene-LOC100780703;Glycine_max_newGene_6205;gene-LOC100798851;gene-LOC100802161;Glycine_max_newGene_3596;gene-LOC100807274;gene-LOC100800268;gene-LOC100804015
GO:0003887	DNA-directed DNA polymerase activity	Molecular Function	13	158	1	1	gene-LOC100809005;gene-LOC100780894;gene-LOC100820492;gene-LOC100804637;gene-LOC100784116;gene-LOC100798779;gene-LOC100791561;gene-LOC100817379;gene-LOC100816973;gene-LOC100782864;gene-POLD1;gene-LOC100813857;gene-LOC100814391
GO:0004518	nuclease activity	Molecular Function	63	419	1	1	gene-LOC100815857;gene-LOC100819721;Glycine_max_newGene_10041;gene-LOC100818966;gene-LOC100776103;gene-LOC100786292;gene-LOC100781204;gene-LOC100800731;gene-LOC100792234;gene-LOC100808784;gene-LOC100783386;gene-LOC100790651;gene-LOC100794080;gene-LOC100791270;gene-LOC100794364;gene-LOC100801969;gene-LOC100778274;gene-LOC100806557;gene-LOC100816677;gene-LOC100803526;gene-LOC100816098;gene-LOC10079…
GO:0003723	RNA binding	Molecular Function	332	1582	1	1	gene-LOC100805811;gene-LOC106794116;gene-LOC100816982;gene-LOC100781743;gene-LOC100788992;gene-LOC100775643;gene-LOC100801408;gene-LOC100799330;gene-LOC100816856;gene-LOC100787612;gene-LOC100818291;gene-LOC100817746;gene-LOC100801025;gene-LOC100787964;gene-LOC100780505;gene-LOC100305623;gene-LOC100306474;gene-LOC100499922;gene-LOC100820389;gene-LOC100819486;gene-LOC100804186;gene-LOC100797277;gen…
GO:0046983	protein dimerization activity	Molecular Function	167	900	1	1	gene-AGL11;gene-LOC100802593;gene-LOC100803633;gene-LOC100807286;gene-LOC100784145;gene-LOC100793455;gene-LOC100791007;gene-LOC102669365;gene-LOC100813520;gene-LOC100779213;gene-LOC100798490;gene-LOC100819853;Glycine_max_newGene_5716;gene-LOC100803326;gene-LOC100785708;gene-LOC100811004;gene-LOC106796315;gene-LOC100781008;gene-LOC100794893;gene-LOC100305611;gene-LOC100808919;gene-LOC100804953;gen…
GO:0003700	transcription factor activity, sequence-specific DNA binding	Molecular Function	331	1684	1	1	gene-LOC100808917;gene-GMAGL1;gene-LOC100787611;gene-MYB48;gene-LOC100814907;gene-LOC100800450;gene-LOC100816249;Glycine_max_newGene_642;gene-GMNF-YA09;gene-LOC100306200;gene-LOC100786173;gene-GMNMHC5;gene-LOC100817942;gene-LOC100804540;gene-LOC100813556;gene-LOC100783557;gene-LOC100804056;gene-LOC100801868;gene-LOC100526744;gene-MYB11;gene-LOC100802063;gene-WRKY37;gene-LOC100784134;gene-LOC10080…
GO:0005524	ATP binding	Molecular Function	497	4445	1	1	gene-LOC100305450;gene-LOC100801124;gene-LOC100816144;gene-LOC100781702;gene-LOC100805954;gene-LOC100787543;gene-LOC100791642;gene-LOC100797095;gene-LOC100305388;gene-LOC100810160;gene-LOC100798863;gene-LOC100798612;gene-LOC100813228;gene-LOC100776041;gene-LOC100817908;gene-LOC100789621;gene-LOC100811468;gene-LOC100792694;gene-LOC100775802;gene-LOC100789814;gene-LOC100795087;gene-LOC100795881;gen…
GO:0003677	DNA binding	Molecular Function	444	2256	1	1	gene-GMPHR24;gene-LOC100776374;gene-LOC100785547;gene-LOC100802470;gene-LOC100781908;gene-LOC100811887;gene-LOC100790644;gene-LOC100782114;gene-LOC100793092;gene-LOC100799257;gene-LOC100781102;gene-LOC100306276;gene-LOC778099;gene-LOC100800669;gene-LOC100777687;gene-LOC100795763;gene-LOC778108;gene-LOC100807637;gene-LOC100775305;gene-LOC100817780;gene-LOC100813103;gene-LOC100817547;gene-NAC15;gen…
GO:0043531	ADP binding	Molecular Function	36	423	1	1	gene-LOC100780862;Glycine_max_newGene_7426;Glycine_max_newGene_4936;gene-LOC100808753;gene-LOC113001152;gene-LOC100527480;gene-RSV3;gene-LOC106795499;gene-LOC112999556;gene-LOC100806688;gene-LOC100783381;gene-LOC102665522;gene-LOC100814075;gene-LOC113001040;gene-LOC100817860;gene-LOC100788025;gene-LOC100791891;gene-LOC112997603;gene-LOC100801951;gene-LOC100801544;gene-LOC106794133;Glycine_max_new…
GO:0003676	nucleic acid binding	Molecular Function	183	2044	1	1	gene-LOC100819601;gene-LOC100800969;gene-LOC100791634;gene-LOC100816677;gene-LOC100793222;gene-LOC100797694;gene-LOC100797777;gene-LOC100499730;gene-LOC100787573;gene-LOC100809945;gene-LOC100799843;gene-LOC100778358;gene-LOC100795875;gene-LOC100813485;gene-LOC100819721;Glycine_max_newGene_6919;gene-LOC100819984;gene-LOC100796237;gene-LOC100797697;gene-LOC100815164;gene-LOC100799461;Glycine_max_ne…
GO:0008270	zinc ion binding	Molecular Function	278	1662	1	1	gene-LOC100813842;gene-LOC100775879;gene-LOC100802183;gene-LOC100802039;gene-LOC100796748;gene-HEMB;gene-GMGLYII-12;gene-LOC100808123;gene-LOC100811424;gene-LOC100815813;gene-LOC100805425;gene-LOC100500201;gene-LOC100820140;gene-LOC100782863;gene-LOC100781438;gene-LOC100798208;Glycine_max_newGene_3085;gene-LOC100306659;Glycine_max_newGene_9403;gene-LOC100807120;gene-LOC100781518;gene-LOC100786479…
GO:0004523	RNA-DNA hybrid ribonuclease activity	Molecular Function	8	302	1	1	gene-LOC100795699;gene-LOC100812666;gene-LOC100526921;gene-LOC100796237;gene-LOC100779875;gene-LOC100787629;gene-RTRP3;Glycine_max_newGene_7426
GO:0005794	Golgi apparatus	Cellular Component	330	658	5.09919e-20	6.9661e-23	gene-LOC100818900;gene-LOC100798193;gene-LOC100806704;gene-LOC100792371;gene-LOC100817416;gene-LOC100781040;gene-LOC100789211;gene-LOC100527130;gene-LOC100815429;gene-LOC100799871;gene-LOC100780444;gene-LOC100805221;gene-LOC100807498;gene-LOC100789517;gene-LOC100818436;gene-LOC100817995;gene-LOC100818177;gene-LOC100818149;gene-LOC100819087;gene-LOC100801272;gene-LOC100527418;Glycine_max_newGene_9…
GO:0000139	Golgi membrane	Cellular Component	132	204	4.83331e-19	6.60289e-22	gene-LOC100797508;gene-LOC100777383;gene-LOC100816698;gene-LOC100802965;gene-LOC100809892;gene-LOC100777657;gene-LOC100781504;gene-LOC100814056;gene-LOC100784316;gene-LOC100810186;gene-LOC100500645;gene-LOC100802162;gene-COPZ2;gene-LOC100818596;gene-LOC100785342;gene-COPZ1;gene-LOC100778251;gene-LOC100778213;gene-LOC100305755;gene-LOC100814913;gene-LOC102666034;gene-LOC100806837;gene-LOC100791591…
GO:0000786	nucleosome	Cellular Component	79	108	1.35454e-15	1.85047e-18	gene-LOC100811872;gene-LOC778165;gene-LOC100802642;gene-LOC100803534;gene-LOC100784431;gene-LOC100783903;gene-LOC100782374;gene-LOC100789702;gene-LOC100305747;gene-LOC100305466;gene-LOC100779904;gene-LOC100499881;gene-LOC100805396;gene-LOC100306323;gene-LOC100805597;gene-LOC100817768;gene-LOC100784085;gene-LOC100778317;gene-LOC100527768;gene-LOC102661475;gene-LOC100776374;gene-LOC100795994;gene-L…
GO:0009523	photosystem II	Cellular Component	44	48	4.99102e-15	6.81834e-18	gene-LOC100808379;gene-LOC100306223;gene-LHCB1-7;gene-LOC100789786;gene-LOC100802138;Glycine_max_newGene_8195;gene-LOC100798548;gene-LOC100799813;gene-LOC100526966;gene-LOC100815789;gene-LOC100794944;gene-LOC100784089;gene-LOC100780841;gene-LOC100792794;gene-LOC100793702;gene-LOC100817348;gene-LOC100814665;gene-LOC100796326;gene-LOC100783223;gene-LOC100305788;gene-LOC100527463;gene-LOC100499815;g…
GO:0009522	photosystem I	Cellular Component	39	41	1.35182e-14	1.84675e-17	gene-LHCB1-7;gene-LOC100808379;gene-LOC100789786;gene-LOC100802138;gene-LOC100799813;gene-LOC100798548;gene-LOC100794944;gene-LOC100815789;gene-LOC100527056;gene-LOC100793702;gene-LOC100784089;gene-LOC100817348;gene-LOC100796326;gene-LOC100305786;gene-LOC100527463;gene-LOC100783223;gene-LOC100800755;gene-LOC100499729;gene-LOC100794604;gene-LOC100500118;gene-CAB3;gene-LOC100305992;gene-LOC547819;g…
GO:0005874	microtubule	Cellular Component	150	279	2.50454e-11	3.42151e-14	gene-LOC100801219;gene-GMIQD43;gene-LOC100818878;gene-LOC100794002;gene-LOC100798612;gene-LOC100781043;gene-LOC100786441;gene-LOC100816898;gene-LOC100798109;gene-LOC100306180;gene-GMIQD61;Glycine_max_newGene_10947;gene-LOC100778310;gene-LOC100819897;gene-LOC100775562;gene-LOC100798849;gene-LOC100788936;gene-TUBB2;gene-LOC100527842;gene-LOC100807401;gene-LOC100810661;gene-LOC100788498;gene-LOC1007…
GO:0030008	TRAPP complex	Cellular Component	14	14	8.64149e-05	1.18053e-07	gene-LOC100305989;gene-LOC100499843;gene-LOC100805386;gene-LOC100814071;gene-LOC100306217;gene-LOC100499988;gene-LOC100499663;gene-LOC100500147;gene-LOC100527093;gene-LOC100527601;gene-LOC100819825;gene-LOC100527008;gene-LOC100500020;gene-LOC100781378
GO:0009535	chloroplast thylakoid membrane	Cellular Component	103	210	0.000138211	1.88813e-07	gene-LOC100775367;gene-LOC100780777;gene-LOC100797443;gene-LOC100798355;gene-LOC100810598;gene-LOC100806845;gene-LOC100306491;gene-LOC100817525;gene-LOC100785180;gene-LOC100779933;gene-LOC100795192;gene-LOC100820335;gene-LOC100801140;gene-LOC100779195;gene-LOC100794604;gene-LOC100306375;gene-LOC100305578;gene-LOC100306554;gene-LOC100306702;gene-LOC100807942;gene-LOC100803191;gene-LOC100796326;gen…
GO:0030126	COPI vesicle coat	Cellular Component	23	30	0.000477119	6.51802e-07	gene-LOC100814417;gene-LOC100802469;gene-COPZ2;gene-LOC100784608;gene-LOC100775726;gene-LOC100785260;gene-LOC100780122;gene-COPZ1;gene-COPE1;gene-LOC100306313;gene-LOC100527022;gene-LOC100789362;gene-LOC100806837;gene-COPE2;gene-LOC100778815;gene-LOC100814149;gene-LOC100305755;gene-LOC100797508;gene-LOC100791801;gene-LOC100807969;gene-LOC100802600;gene-LOC100818132;gene-LOC100781504
GO:0009538	photosystem I reaction center	Cellular Component	13	14	0.00266016	3.6341e-06	gene-LOC100527240;gene-LOC100800992;gene-LOC100776789;gene-LOC100811078;gene-LOC100811201;gene-LOC100499814;gene-PSAD;gene-LOC100499832;gene-LOC100526993;gene-LOC100807732;gene-LOC100500098;gene-LOC100500317;gene-LOC100500540
GO:0031225	anchored component of membrane	Cellular Component	29	44	0.00296037	4.04423e-06	Glycine_max_newGene_5278;gene-LOC100797001;gene-LOC100810878;gene-LOC100790103;Glycine_max_newGene_11368;gene-LOC100801468;gene-LOC100805574;gene-LOC100499686;gene-LOC100813994;gene-LOC100777080;gene-LOC100779758;gene-LOC100306166;gene-LOC100306685;gene-LOC100803929;gene-LOC100499681;gene-LOC100784565;gene-LOC100818802;gene-LOC100808347;gene-LOC100785994;gene-LOC100777292;gene-LOC100306063;gene-L…
GO:0042555	MCM complex	Cellular Component	14	16	0.00510843	6.97872e-06	gene-LOC100813006;gene-LOC100782586;gene-LOC100779483;gene-LOC100811545;gene-LOC100794021;gene-LOC100787290;gene-LOC100781925;gene-LOC100802903;gene-LOC100805788;gene-LOC100799441;gene-LOC100791302;gene-LOC100800649;gene-LOC100811639;gene-LOC100776255
GO:0008250	oligosaccharyltransferase complex	Cellular Component	12	13	0.00774315	1.05781e-05	gene-LOC100814831;gene-LOC100306016;gene-LOC100793228;gene-LOC100806815;gene-LOC100817203;gene-LOC100780415;gene-LOC100814638;gene-LOC100499801;gene-LOC100776251;gene-LOC100776829;gene-LOC100796192;gene-LOC100806848
GO:0005840	ribosome	Cellular Component	158	373	0.0108201	1.47816e-05	gene-LOC100306626;gene-LOC100817876;gene-LOC100808592;gene-LOC100805957;gene-LOC100810611;gene-LOC100499889;gene-LOC547816;gene-LOC100499846;gene-LOC100811654;gene-LOC100819636;gene-LOC100305997;gene-LOC100527647;gene-LOC100499685;gene-LOC100808184;gene-LOC100810082;gene-LOC100499863;gene-LOC100805664;gene-LOC100788626;gene-LOC100526952;gene-LOC100305587;gene-LOC100779285;gene-LOC100810108;gene-L…
GO:0005802	trans-Golgi network	Cellular Component	74	153	0.0128916	1.76114e-05	gene-LOC100798553;gene-LOC100798759;gene-LOC100809504;gene-LOC100500020;gene-LOC100799031;gene-LOC100799663;gene-LOC100779149;gene-LOC100812239;gene-LOC100813493;gene-LOC100810567;gene-LOC100778769;gene-LOC100815504;gene-LOC100817472;gene-LOC100786644;gene-LOC100811384;gene-LOC100808777;gene-LOC100799841;gene-LOC100779373;gene-LOC100783833;gene-LOC100800535;gene-LOC100818599;gene-LOC100784179;gen…
GO:0022625	cytosolic large ribosomal subunit	Cellular Component	63	127	0.0198654	2.71385e-05	gene-LOC100813342;gene-LOC100805868;gene-LOC100793713;Glycine_max_newGene_6000;gene-LOC100818880;gene-LOC100499789;gene-LOC100306120;gene-LOC100817746;gene-LOC100775472;gene-LOC100499921;gene-LOC100785356;gene-LOC100785668;gene-LOC100818819;gene-LOC100305682;gene-LOC100306213;gene-LOC100499730;gene-LOC100809343;gene-LOC100817971;gene-LOC100775705;gene-LOC100499883;gene-LOC100786299;gene-LOC100500…
GO:0010287	plastoglobule	Cellular Component	26	41	0.0258584	3.53257e-05	gene-LOC100794604;gene-LOC100820327;gene-LOC100500118;gene-CAB3;gene-LOC100805310;gene-LOC100786260;gene-LOC100808668;Glycine_max_newGene_8049;gene-LOC100779387;gene-LOC100785180;gene-LOC100806585;Glycine_max_newGene_392;gene-LOC100785415;gene-LOC100820335;gene-LOC100790960;gene-LOC100803715;gene-LOC100789786;gene-LOC100777875;gene-LOC100799813;gene-LOC100306679;gene-LOC100780001;gene-LOC10079632…
GO:0033179	proton-transporting V-type ATPase, V0 domain	Cellular Component	15	19	0.0258669	3.53373e-05	gene-LOC100527042;gene-LOC100787215;gene-LOC100778175;gene-LOC100777816;gene-LOC100500014;gene-LOC100798638;gene-LOC100804255;gene-LOC100781475;gene-LOC100812380;gene-LOC100527598;gene-LOC100779290;gene-LOC100796361;gene-LOC100798558;gene-LOC100815182;gene-LOC100527177
GO:0005856	cytoskeleton	Cellular Component	72	152	0.0395336	5.40076e-05	gene-LOC100806297;gene-GMIQD9;gene-GMIQD61;gene-LOC100815472;gene-LOC100808485;gene-LOC100805150;gene-GMIQD20;gene-LOC100803222;gene-LOC100807384;gene-LOC100798109;gene-GMIQD43;gene-GMIQD63;gene-LOC100813437;gene-LOC100818162;gene-LOC100805035;Glycine_max_newGene_880;gene-LOC100794002;gene-GMIQD4;gene-LOC100814694;gene-SOY69;gene-GMIQD16;gene-GMIQD35;gene-GMIQD46;gene-LOC100789000;gene-LOC1007819…
GO:0005789	endoplasmic reticulum membrane	Cellular Component	127	297	0.0430152	5.8764e-05	gene-LOC100793862;gene-LOC100500066;gene-LOC100780823;gene-LOC100527303;gene-LOC100791527;gene-LOC100784645;gene-LOC100802948;gene-DGAT1A;gene-LOC100802781;gene-LOC100499866;gene-LOC100815384;gene-LOC100799056;gene-FAD5.2;gene-LOC100306406;gene-GMBZIP37;gene-LOC100500122;Glycine_max_newGene_2066;gene-LOC100787981;gene-LOC547940;gene-LOC100779979;gene-LOC100817357;gene-LOC100795691;gene-LOC1008016…
GO:0005750	mitochondrial respiratory chain complex III	Cellular Component	10	11	0.0644441	8.80384e-05	gene-LOC100799135;gene-LOC100798615;gene-LOC100803087;gene-LOC100792906;gene-LOC100796742;gene-LOC100527652;gene-LOC100777056;gene-LOC100499867;gene-LOC100500024;gene-LOC100780417
GO:0005768	endosome	Cellular Component	80	175	0.0728431	9.95125e-05	gene-LOC100807514;gene-LOC100794161;gene-LOC100782059;gene-LOC100814235;gene-LOC100812784;gene-LOC100778100;gene-LOC100813795;gene-LOC100793395;gene-LOC100794919;gene-LOC100783004;gene-LOC100789211;gene-LOC100807251;gene-LOC100305769;gene-LOC100806600;gene-LOC100813307;gene-LOC100793663;gene-LOC100809598;gene-BURP2;gene-LOC100820115;gene-LOC100527366;gene-LOC102669038;gene-LOC100780896;gene-LOC10…
GO:0000938	GARP complex	Cellular Component	8	8	0.080709	0.000110258	gene-LOC100817329;gene-LOC100804432;gene-LOC100791359;gene-LOC100779149;gene-LOC100777704;gene-LOC100818891;gene-LOC100810735;gene-LOC100799852
GO:0005885	Arp2/3 protein complex	Cellular Component	13	17	0.158045	0.000215909	gene-LOC100809745;gene-LOC100804478;gene-LOC100796648;gene-LOC100819020;gene-LOC100527736;gene-LOC100795255;gene-LOC100817997;gene-LOC100778870;gene-LOC100789138;gene-LOC100780462;gene-LOC100819872;gene-LOC100797955;gene-LOC100778688
GO:0070469	respiratory chain	Cellular Component	19	29	0.158606	0.000216675	gene-LOC100527337;gene-LOC100306371;gene-LOC100500620;gene-LOC100807967;gene-LOC100777389;gene-LOC100786583;gene-LOC100499828;gene-LOC100806917;gene-LOC100526873;gene-LOC100527668;gene-LOC100789832;gene-LOC100499929;gene-LOC100810522;gene-LOC100782702;gene-LOC100500582;gene-LOC100500486;gene-LOC100500382;gene-LOC100500015;gene-LOC100305937
GO:0005881	cytoplasmic microtubule	Cellular Component	17	25	0.175284	0.000239459	gene-LOC100819367;gene-LOC100806408;gene-LOC100779608;gene-LOC100775793;gene-LOC100820523;gene-LOC100797456;gene-LOC100794002;gene-LOC100807370;gene-LOC100805687;gene-LOC100801377;gene-LOC100796864;gene-LOC100799668;gene-LOC100802923;gene-LOC100818900;gene-LOC100798109;gene-LOC100808026;gene-LOC100780150
GO:0005788	endoplasmic reticulum lumen	Cellular Component	16	23	0.179322	0.000244976	gene-LOC100801827;gene-LOC100812667;gene-LOC100811997;gene-LOC547838;gene-GMBIP2;gene-LOC100804685;gene-LOC100803843;gene-LOC100796871;gene-LOC100786127;gene-GMBIP4;gene-LOC100802428;gene-LOC100808667;gene-LOC100792441;gene-LOC100776652;gene-LOC100037475;gene-LOC100781496
GO:0005783	endoplasmic reticulum	Cellular Component	190	481	0.199214	0.000272151	gene-LOC100781294;gene-LOC100806645;gene-LOC100792293;gene-LOC100818808;gene-LOC100775345;gene-LOC100793455;gene-LOC100527008;gene-LOC100796212;gene-LOC100305989;gene-LOC100820543;gene-LOC100797897;gene-LOC102668608;gene-LOC100783704;gene-LOC100814139;gene-LOC100809527;gene-LOC100787972;gene-LOC100801005;gene-LOC100818705;gene-LOC100804749;gene-LOC100813728;gene-LOC100788728;gene-LOC100805094;gen…
GO:0005960	glycine cleavage complex	Cellular Component	7	7	0.252231	0.000344578	gene-LOC100305815;gene-LOC100795673;gene-LOC100792708;gene-LOC100814366;gene-LOC100796561;gene-LOC100785811;gene-LOC100306654
GO:0031201	SNARE complex	Cellular Component	31	57	0.284226	0.000388287	gene-LOC100789318;gene-LOC100796477;gene-LOC100796741;gene-SNAP18;gene-LOC100777383;gene-LOC100790368;gene-LOC100778493;gene-LOC106795763;gene-LOC100787129;gene-LOC100777961;gene-LOC100815385;gene-LOC100786529;gene-LOC100800991;gene-LOC100786429;gene-LOC100780765;gene-LOC100500645;gene-LOC100819272;gene-GOS12;gene-LOC100811494;gene-LOC100796579;gene-LOC100810956;gene-LOC100780958;gene-LOC10079949…
GO:0005747	mitochondrial respiratory chain complex I	Cellular Component	19	30	0.302895	0.000413792	gene-LOC100802267;gene-LOC100306515;gene-LOC100500382;gene-LOC100306645;gene-LOC100500566;gene-LOC100500489;gene-LOC100816948;gene-LOC100306450;gene-LOC100499925;gene-LOC100499828;gene-LOC100500270;gene-LOC100499948;gene-LOC100527551;gene-LOC100527389;gene-LOC100306452;gene-LOC100305691;gene-LOC100786050;gene-LOC100527561;gene-LOC100500620
GO:0005793	endoplasmic reticulum-Golgi intermediate compartment	Cellular Component	18	28	0.329767	0.000450501	gene-LOC100775345;gene-LOC100527418;gene-LOC100814149;gene-LOC100791801;gene-LOC100789362;gene-LOC100798672;gene-LOC100499866;gene-LOC100799948;gene-LOC100527637;gene-LOC100817584;gene-LOC100306668;gene-LOC100801486;gene-LOC100817357;gene-LOC100500676;gene-LOC100499675;gene-LOC100527303;gene-LOC100803636;gene-LOC100784608
GO:0009534	chloroplast thylakoid	Cellular Component	41	82	0.386133	0.000527504	gene-LOC100779397;gene-LOC100792508;gene-LOC100780482;gene-LOC100797102;gene-LOC100305959;gene-LOC100780194;gene-LOC100814665;gene-LOC100775624;gene-LOC100785945;gene-LOC100305905;gene-LOC100807942;gene-LOC100779964;gene-LOC100780001;gene-LOC100306679;gene-LOC100810796;gene-LOC100799926;gene-LOC100790239;gene-LOC100784482;gene-LOC100801140;gene-LOC100817063;gene-PDS1;gene-LOC100805220;gene-LOC100…
GO:0005743	mitochondrial inner membrane	Cellular Component	48	100	0.448609	0.000612853	gene-LOC100500582;gene-LOC100790120;gene-LOC100499736;gene-LOC100500468;gene-LOC100776773;gene-LOC100786583;gene-LOC100526873;gene-LOC100779966;gene-LOC100527668;gene-LOC100818408;gene-LOC100500530;gene-LOC100779975;gene-LOC100306025;gene-LOC100782702;gene-LOC100500382;gene-LOC100500486;gene-LOC100802974;gene-LOC100819556;gene-LOC100306371;gene-LOC100500620;gene-LOC100799825;gene-LOC100784443;gen…
GO:0005871	kinesin complex	Cellular Component	53	113	0.483491	0.000660507	gene-LOC100801196;gene-LOC100785855;Glycine_max_newGene_2830;gene-LOC100779826;gene-LOC100802585;gene-LOC100817813;gene-LOC100786770;gene-LOC100785581;gene-LOC100819897;gene-LOC100798358;gene-LOC100801279;gene-LOC100800014;gene-LOC100817066;gene-LOC100784221;gene-LOC100787957;gene-LOC100806354;gene-LOC100796881;gene-LOC100784725;gene-LOC100817984;gene-LOC100782128;gene-LOC100809766;gene-LOC100813…
GO:0000930	gamma-tubulin complex	Cellular Component	8	9	0.519803	0.000710114	gene-LOC100795585;gene-LOC100786441;Glycine_max_newGene_10983;gene-LOC100782299;gene-LOC100775439;gene-LOC100780017;gene-LOC100786327;gene-LOC100819794
GO:0005938	cell cortex	Cellular Component	23	40	0.562879	0.000768961	gene-LOC100785464;gene-PRO2;gene-LOC100527158;gene-LOC100499696;gene-LOC100807530;gene-LOC100527464;gene-LOC100794002;gene-LOC100807370;gene-LOC100805035;gene-LOC100803222;gene-LOC100796864;gene-LOC100798109;gene-LOC100798550;gene-LOC100780150;gene-LOC100790459;gene-ROP10;gene-LOC100805150;gene-LOC100127411;gene-LOC100797456;gene-LOC100808445;gene-LOC100818900;gene-LOC100784351;gene-LOC100499717
GO:0030981	cortical microtubule cytoskeleton	Cellular Component	9	11	0.721322	0.000985413	gene-LOC100797456;gene-LOC100807370;gene-LOC100794002;gene-LOC100780150;gene-LOC100798109;gene-LOC100818900;gene-LOC100784351;gene-LOC100796864;gene-LOC100808445
GO:0015630	microtubule cytoskeleton	Cellular Component	42	87	0.82713	0.00112996	gene-GMIQD10;gene-GMIQD61;gene-LOC100808485;gene-GMIQD45;gene-GMIQD20;gene-GMIQD14;gene-GMIQD9;gene-LOC100806297;gene-LOC100784351;gene-GMIQD54;gene-GMIQD18;gene-GMIQD43;gene-LOC100500215;gene-GMIQD63;gene-GMIQD15;gene-GMIQD17;gene-GMIQD4;gene-LOC100794002;gene-GMIQD42;gene-LOC100807384;gene-LOC100798109;gene-GMIQD5;gene-LOC100794027;gene-GMIQD25;gene-LOC100781924;gene-LOC100797456;gene-LOC100814…
GO:0030176	integral component of endoplasmic reticulum membrane	Cellular Component	31	60	0.896566	0.00122482	gene-LOC100818599;gene-LOC100791885;gene-LOC100793743;gene-LOC100526911;gene-LOC100787513;gene-LOC100807550;gene-LOC100786727;gene-LOC100777545;gene-LOC100813988;gene-LOC100499752;gene-LOC100802618;Glycine_max_newGene_7463;gene-LOC100527150;gene-LOC100815011;gene-LOC100783754;gene-LOC100781854;gene-LOC100789415;gene-LOC100809457;gene-LOC100812669;gene-LOC100795200;gene-LOC100796452;gene-LOC100784…
GO:0005787	signal peptidase complex	Cellular Component	11	15	0.906873	0.0012389	gene-LOC100305648;gene-LOC100499705;gene-LOC100499695;gene-LOC100777545;gene-LOC100797100;gene-LOC100526911;gene-LOC100306631;gene-LOC100499792;gene-LOC100797179;gene-LOC100499788;gene-LOC100801319
GO:0005786	signal recognition particle, endoplasmic reticulum targeting	Cellular Component	12	17	0.919334	0.00125592	gene-LOC100815799;gene-LOC100500453;gene-LOC100526909;gene-LOC100791472;gene-LOC100816486;gene-LOC100792778;gene-LOC100810125;gene-LOC100788603;gene-LOC100776490;gene-LOC100811012;gene-LOC100811698;gene-LOC100500606
GO:0005680	anaphase-promoting complex	Cellular Component	21	37	1	0.00162172	gene-LOC100818647;gene-GMILPA1;gene-LOC100784841;gene-LOC100785428;gene-LOC100785127;gene-LOC100778607;gene-LOC100527611;gene-LOC100780928;gene-LOC100803289;gene-LOC100800467;gene-LOC100808673;gene-LOC100527617;gene-LOC100776546;gene-LOC100804373;gene-LOC100785726;gene-CCS52;gene-LOC100805741;gene-LOC100808928;gene-LOC100806981;gene-LOC100526925;gene-LOC100789971
GO:0022627	cytosolic small ribosomal subunit	Cellular Component	37	76	1	0.00179397	gene-LOC100527516;gene-LOC100499862;gene-LOC100803556;gene-LOC100818292;gene-LOC100499937;gene-LOC100806820;gene-LOC100781822;gene-LOC100500179;gene-LOC100795581;gene-LOC100305898;gene-LOC100499723;gene-LOC100799973;gene-LOC100805519;gene-LOC100816874;gene-LOC100305687;gene-LOC100305645;gene-LOC100786575;gene-LOC100801408;gene-LOC100803623;gene-LOC100777379;gene-LOC100500684;gene-LOC547645;gene-L…
GO:0099513	polymeric cytoskeletal fiber	Cellular Component	23	42	1	0.00189251	gene-LOC100798652;gene-GMIQD42;gene-LOC100807370;gene-LOC100794002;gene-GMIQD43;gene-GMIQD18;gene-GMIQD63;gene-LOC100798109;gene-LOC100780150;gene-LOC100796864;gene-LOC100807384;gene-LOC100815100;gene-GMIQD7;gene-LOC100797456;gene-GMIQD10;gene-GMIQD61;gene-GMIQD45;gene-GMIQD25;gene-LOC100818900;gene-LOC100799542;gene-GMIQD54;gene-GMIQD46;gene-GMIQD35
GO:0071439	clathrin complex	Cellular Component	8	10	1	0.00254578	gene-LOC100778846;gene-LOC100776763;gene-LOC100784651;gene-LOC547986;gene-LOC100786617;gene-LOC100808189;gene-LOC100786715;gene-LOC100802224
GO:0033180	proton-transporting V-type ATPase, V1 domain	Cellular Component	8	10	1	0.00254578	gene-LOC100791429;gene-LOC100305531;gene-LOC100780523;gene-LOC100804483;gene-LOC100803728;gene-LOC100775727;gene-LOC100793764;gene-LOC100814929
GO:0005749	mitochondrial respiratory chain complex II, succinate dehydrogenase complex (ubiquinone)	Cellular Component	8	10	1	0.00254578	gene-LOC100527668;gene-LOC100527646;gene-LOC100818379;gene-LOC100499683;gene-LOC100803020;gene-LOC100777981;gene-LOC100527396;gene-LOC100527337
GO:0000221	vacuolar proton-transporting V-type ATPase, V1 domain	Cellular Component	5	5	1	0.00336426	gene-LOC100813963;gene-LOC100780187;gene-LOC100788723;gene-LOC100796479;gene-LOC100790694
GO:0000923	equatorial microtubule organizing center	Cellular Component	6	7	1	0.00546976	gene-LOC100819794;gene-LOC100780017;gene-LOC100795585;gene-LOC100786441;Glycine_max_newGene_10983;gene-LOC100782299
GO:0030130	clathrin coat of trans-Golgi network vesicle	Cellular Component	11	17	1	0.00567763	gene-LOC100784651;gene-LOC100778846;gene-LOC100808189;gene-LOC100786617;gene-LOC547986;gene-LOC100813474;gene-LOC100802224;gene-LOC100786715;gene-LOC100776763;gene-LOC100788673;gene-LOC100820255
GO:0030132	clathrin coat of coated pit	Cellular Component	11	17	1	0.00567763	gene-LOC100778846;gene-LOC100784651;gene-LOC547986;gene-LOC100786617;gene-LOC100808189;gene-LOC100786715;gene-LOC100802224;gene-LOC100813474;gene-LOC100788673;gene-LOC100776763;gene-LOC100820255
GO:0015935	small ribosomal subunit	Cellular Component	21	40	1	0.00569979	gene-LOC100306474;gene-LOC100306064;gene-LOC100797241;gene-LOC100499657;gene-LOC100813093;gene-LOC100807649;gene-LOC100803623;gene-LOC100796918;gene-LOC100500017;gene-LOC100817306;gene-LOC100812117;gene-LOC100305663;gene-LOC100499912;gene-LOC100809558;gene-LOC100499851;gene-LOC100499758;gene-LOC100816874;gene-LOC100791227;gene-LOC100500179;gene-LOC100790098;gene-LOC100796694
GO:0009654	photosystem II oxygen evolving complex	Cellular Component	21	40	1	0.00569979	gene-LOC100499794;gene-LOC100776365;gene-LOC100811386;gene-LOC100801831;gene-LOC100784806;gene-LOC100789641;gene-LOC100802315;gene-LOC100813388;gene-LOC100792664;gene-LOC100305752;gene-LOC100820458;gene-LOC100813771;gene-LOC100780777;gene-LOC100795124;gene-LOC100781848;gene-LOC100798485;gene-LOC100306491;gene-LOC100785276;gene-LOC100792252;gene-LOC100306034;gene-LOC100305918
GO:0044448	cell cortex part	Cellular Component	10	15	1	0.00616966	gene-LOC100818900;gene-LOC100784351;gene-LOC100798109;gene-LOC100780150;gene-LOC100797456;gene-LOC100807370;gene-LOC100794002;gene-LOC100808445;gene-LOC100796864;gene-LOC100805150
GO:0000177	cytoplasmic exosome (RNase complex)	Cellular Component	10	15	1	0.00616966	gene-LOC100776087;gene-LOC100816271;gene-LOC100809941;gene-LOC100818324;gene-LOC100806953;gene-LOC100815140;gene-LOC100819105;gene-LOC100801931;gene-LOC100801484;gene-LOC100782953
GO:0030863	cortical cytoskeleton	Cellular Component	10	15	1	0.00616966	gene-LOC100796864;gene-LOC100805150;gene-LOC100808445;gene-LOC100780150;gene-LOC100797456;gene-LOC100807370;gene-LOC100794002;gene-LOC100818900;gene-LOC100784351;gene-LOC100798109
GO:0044430	cytoskeletal part	Cellular Component	41	91	1	0.00618854	gene-GMIQD7;gene-LOC100815100;gene-GMIQD12;gene-LOC100796864;gene-LOC100780150;gene-LOC100782829;gene-LOC100807370;gene-LOC100798652;gene-LOC100814445;gene-GMIQD35;gene-GMIQD16;gene-GMIQD58;gene-LOC100814694;gene-LOC100808445;gene-GMIQD46;gene-LOC100799542;gene-LOC100818900;gene-GMIQD25;gene-LOC100797456;gene-LOC100807384;gene-LOC100794027;gene-GMIQD5;gene-LOC100798109;gene-GMIQD15;gene-GMIQD63;g…
GO:0055028	cortical microtubule	Cellular Component	8	11	1	0.00670675	gene-LOC100780141;gene-LOC100796864;gene-LOC100798109;gene-LOC100818900;gene-LOC100797456;gene-LOC100807370;gene-LOC100794002;gene-LOC100780150
GO:0009579	thylakoid	Cellular Component	37	81	1	0.00689429	gene-LOC100817063;gene-LOC100801140;gene-RCABETA;gene-LOC100807967;gene-LOC100813325;gene-LOC100805220;gene-LOC100500352;gene-RCAALPHA;gene-LOC100791634;gene-LOC100806845;gene-HRBP1;gene-LOC100800917;gene-LOC100817380;gene-LOC100797443;gene-LOC100783342;gene-CAS;gene-LOC100803715;gene-LOC100499940;gene-LOC100306676;gene-RCA11;gene-LOC100500580;gene-RCA14;gene-LOC100306487;gene-LOC100784029;gene-L…
GO:0030134	COPII-coated ER to Golgi transport vesicle	Cellular Component	14	24	1	0.00696469	gene-LOC100527303;gene-LOC100817357;gene-LOC100500676;gene-LOC100499675;gene-LOC100803636;gene-LOC100798672;gene-LOC100499866;gene-LOC100775345;gene-LOC100527418;gene-LOC100527637;gene-LOC100817584;gene-LOC100306668;gene-LOC100801486;gene-LOC100799948
GO:0071944	cell periphery	Cellular Component	162	431	1	0.007627	gene-LOC100777292;gene-LOC100801262;gene-LOC102666919;gene-LOC100787996;gene-LOC100779100;gene-LOC100797239;gene-LOC100788395;gene-LOC100807370;gene-LOC100306063;gene-LOC100305501;gene-GMIQD12;gene-LOC100796864;gene-LOC100808966;gene-LOC100785742;gene-LOC100787187;gene-LOC100789174;gene-LOC100810878;gene-LOC100785793;gene-LOC100780877;gene-LOC100797456;gene-LOC100797297;gene-LOC100306559;gene-LOC…
GO:0015629	actin cytoskeleton	Cellular Component	30	64	1	0.00915976	gene-LOC100801124;gene-LOC100804820;gene-LOC100786893;gene-LOC100499953;gene-LOC100305720;gene-LOC100500501;gene-LOC100814445;gene-LOC100802614;gene-LOC100527688;gene-LOC100793035;gene-LOC100786418;gene-LOC100801857;gene-LOC100526982;gene-ADF1;gene-LOC100500025;gene-LOC100819436;gene-LOC100785493;gene-LOC100787208;gene-LOC100805150;gene-LOC100790323;gene-LOC100499947;gene-LOC100819975;gene-LOC100…
GO:1990071	TRAPPII protein complex	Cellular Component	4	4	1	0.0105103	gene-LOC100500147;gene-LOC100782619;gene-LOC100527008;gene-LOC100787264
GO:0005967	mitochondrial pyruvate dehydrogenase complex	Cellular Component	4	4	1	0.0105103	Glycine_max_newGene_5834;gene-LOC100816737;gene-LOC100817577;gene-LOC100781250
GO:0005640	nuclear outer membrane	Cellular Component	4	4	1	0.0105103	gene-LOC100782080;gene-LOC100804911;gene-MAF1;gene-LOC100791162
GO:0061617	MICOS complex	Cellular Component	4	4	1	0.0105103	gene-LOC100794530;gene-LOC100807909;gene-LOC100783683;gene-LOC100527672
GO:0019773	proteasome core complex, alpha-subunit complex	Cellular Component	14	25	1	0.0112139	gene-LOC102662733;gene-LOC100820387;gene-LOC100795748;gene-LOC100790481;gene-LOC100527630;gene-LOC100796147;gene-LOC100527499;gene-LOC100786457;gene-LOC100802854;gene-LOC100799919;gene-LOC100793282;gene-LOC100819051;gene-LOC100792921;gene-LOC100808731
GO:0031226	intrinsic component of plasma membrane	Cellular Component	14	25	1	0.0112139	gene-LOC100499681;gene-LOC100306685;gene-LOC100814074;gene-LOC100306166;gene-LOC100808966;gene-LOC100499686;gene-LOC100306063;gene-LOC100777292;gene-LOC100785994;gene-LOC100801468;gene-LOC100810878;gene-LOC100797001;gene-LOC100818802;Glycine_max_newGene_5278
GO:0070971	endoplasmic reticulum exit site	Cellular Component	10	16	1	0.0117582	gene-LOC100803793;gene-LOC100795053;gene-LOC100500031;gene-LOC100804134;gene-LOC100526929;gene-LOC100305632;gene-LOC100305650;gene-LOC100791527;gene-LOC100813940;gene-LOC100811102
GO:0072546	ER membrane protein complex	Cellular Component	9	14	1	0.0131551	gene-LOC100306572;gene-LOC100788772;gene-LOC100499690;gene-LOC100306269;gene-LOC100806417;gene-LOC100790095;gene-LOC100804998;gene-LOC100526986;gene-LOC100807708
GO:0031224	intrinsic component of membrane	Cellular Component	27	58	1	0.0144829	gene-LOC100777080;gene-LOC100806698;gene-LOC100306166;gene-LOC100779758;gene-LOC100306685;gene-LOC100499681;gene-LOC100784565;gene-LOC100797001;Glycine_max_newGene_5278;gene-LOC100499736;gene-LOC100810878;gene-LOC100790103;gene-LOC100801468;gene-LOC100805574;gene-LOC100499686;gene-LOC100813994;gene-LOC100776105;gene-LOC100778240;gene-LOC100808966;gene-LOC100814074;gene-LOC100305699;gene-LOC100818…
GO:0005880	nuclear microtubule	Cellular Component	8	12	1	0.0144878	gene-LOC100791401;gene-LOC100802440;gene-LOC100782524;gene-LOC100815206;gene-LOC100808920;gene-LOC100795915;gene-LOC100794551;gene-LOC100796917
GO:0005763	mitochondrial small ribosomal subunit	Cellular Component	8	12	1	0.0144878	gene-LOC100786442;gene-LOC100797241;gene-LOC100782150;gene-LOC100500426;gene-LOC100796918;gene-LOC100811097;gene-LOC100799648;gene-LOC100800084
GO:0034399	nuclear periphery	Cellular Component	8	12	1	0.0144878	gene-LOC100527617;gene-LOC100804911;gene-LOC100782080;gene-LOC100791634;gene-LOC100795961;gene-MAF1;gene-LOC100806711;gene-LOC100791162
GO:0098552	side of membrane	Cellular Component	5	6	1	0.0148018	gene-LOC100801140;gene-LOC100818900;gene-LOC100794002;gene-LOC100807370;gene-LOC100790239
GO:0010330	cellulose synthase complex	Cellular Component	5	6	1	0.0148018	gene-LOC100818900;gene-LOC100780150;gene-LOC100796864;gene-LOC100807370;gene-LOC100794002
GO:0016363	nuclear matrix	Cellular Component	7	10	1	0.0155475	gene-LOC100782080;gene-LOC100804911;gene-LOC100791634;gene-MAF1;gene-LOC100795961;gene-LOC100806711;gene-LOC100791162
GO:0005677	chromatin silencing complex	Cellular Component	7	10	1	0.0155475	gene-LOC100816714;gene-LOC100819331;gene-LOC100815645;gene-LOC100780157;gene-LOC100785502;Glycine_max_newGene_7864;gene-LOC100816128
GO:0045261	proton-transporting ATP synthase complex, catalytic core F(1)	Cellular Component	6	8	1	0.0159246	gene-LOC100813657;gene-LOC100797290;gene-LOC100789705;gene-LOC100790402;gene-LOC100797948;gene-LOC100780778
GO:0000275	mitochondrial proton-transporting ATP synthase complex, catalytic core F(1)	Cellular Component	6	8	1	0.0159246	gene-LOC100797948;gene-LOC100306025;gene-LOC100499703;gene-ATPC;gene-LOC100789705;gene-LOC100799603
GO:0043186	P granule	Cellular Component	6	8	1	0.0159246	gene-LOC100781743;gene-LOC100791226;gene-LOC100801796;gene-LOC100795756;gene-LOC100500333;gene-LOC100784557
GO:0030127	COPII vesicle coat	Cellular Component	14	26	1	0.0172345	gene-LOC100526929;gene-LOC100794696;gene-LOC100305650;gene-LOC100305632;gene-LOC100500031;gene-LOC100804134;gene-LOC100781518;gene-LOC100803793;gene-LOC100813263;gene-LOC100797752;gene-LOC100784551;gene-LOC100813940;gene-LOC100787533;gene-LOC100791527
GO:0005635	nuclear envelope	Cellular Component	16	31	1	0.0183021	gene-LOC100785151;gene-LOC100810969;gene-LOC100782080;gene-LOC100806017;gene-LOC100791162;gene-LOC100806711;gene-LOC100795961;gene-LOC100777398;gene-LOC100813866;gene-LOC100782006;gene-LOC100804911;gene-LOC100801201;gene-LOC100801426;gene-LOC100796587;gene-MAF1;gene-LOC100780721
GO:0005773	vacuole	Cellular Component	83	213	1	0.0185382	gene-LOC100799618;gene-LOC100789658;gene-GMNRAMP1B;gene-LOC100817104;gene-LOC100815141;gene-LOC100783864;gene-LOC100499880;gene-LOC100815037;gene-LOC100779624;gene-HIR3;gene-LOC100797295;gene-GMNRAMP2A;gene-LOC100800885;gene-LOC100805845;gene-LOC100789295;gene-LOC100788170;gene-LOC100806381;gene-LOC100819973;gene-LOC100781074;gene-LOC100786411;gene-LOC100305679;gene-LOC100818098;Glycine_max_newGe…
GO:0099512	supramolecular fiber	Cellular Component	25	54	1	0.0196904	gene-LOC100807384;gene-LOC100815100;gene-LOC100796864;gene-GMIQD7;gene-LOC100780150;gene-LOC100798109;gene-GMIQD63;gene-GMIQD43;gene-GMIQD18;gene-GMIQD42;gene-LOC100818162;gene-LOC100807370;gene-LOC100794002;gene-LOC100814445;gene-LOC100798652;gene-GMIQD35;gene-LOC100799542;gene-GMIQD54;gene-GMIQD46;gene-LOC100818900;gene-GMIQD45;gene-GMIQD25;gene-GMIQD61;gene-GMIQD10;gene-LOC100797456
GO:0099081	supramolecular polymer	Cellular Component	25	54	1	0.0196904	gene-GMIQD43;gene-GMIQD18;gene-GMIQD63;gene-LOC100798652;gene-LOC100814445;gene-GMIQD42;gene-LOC100818162;gene-LOC100807370;gene-LOC100794002;gene-LOC100807384;gene-LOC100815100;gene-LOC100796864;gene-GMIQD7;gene-LOC100798109;gene-LOC100780150;gene-GMIQD61;gene-GMIQD10;gene-GMIQD45;gene-GMIQD25;gene-LOC100797456;gene-GMIQD35;gene-LOC100818900;gene-LOC100799542;gene-GMIQD54;gene-GMIQD46
GO:0005829	cytosol	Cellular Component	479	1389	1	0.0223704	gene-LOC100783175;gene-LOC100813307;gene-LOC100818892;gene-LOC100796785;gene-LOC547643;gene-LOC100779241;gene-LOC100777607;gene-LOC100803741;gene-LOC100802847;gene-LOC100786884;gene-LOC100796274;gene-LOC100799871;gene-GMIQD58;gene-LOC100789053;gene-LOC100788717;gene-LOC100804191;gene-LOC100818441;gene-LOC102664297;gene-LOC100795914;gene-LOC100810088;gene-LOC100808400;gene-LOC100776763;gene-LOC100…
GO:0048188	Set1C/COMPASS complex	Cellular Component	9	15	1	0.0236333	gene-LOC100807825;gene-LOC100818094;gene-LOC100816297;gene-LOC100811475;gene-LOC100786748;gene-LOC100785519;gene-LOC100818581;gene-LOC100794027;gene-LOC100814231
GO:0030131	clathrin adaptor complex	Cellular Component	12	22	1	0.023804	Glycine_max_newGene_4031;gene-LOC100809730;gene-LOC100790260;Glycine_max_newGene_7838;gene-LOC100789477;gene-LOC100799191;gene-LOC100800985;gene-LOC100808175;gene-LOC100801068;gene-LOC100782926;gene-LOC100784577;gene-LOC100801153
GO:0099080	supramolecular complex	Cellular Component	25	55	1	0.0253442	gene-GMIQD10;gene-GMIQD61;gene-GMIQD45;gene-GMIQD25;gene-LOC100797456;gene-GMIQD35;gene-LOC100818900;gene-LOC100799542;gene-GMIQD46;gene-GMIQD54;gene-GMIQD43;gene-GMIQD18;gene-GMIQD63;gene-LOC100814445;gene-LOC100798652;gene-LOC100818162;gene-GMIQD42;gene-LOC100807370;gene-LOC100794002;gene-LOC100796864;gene-LOC100807384;gene-LOC100815100;gene-GMIQD7;gene-LOC100798109;gene-LOC100780150
GO:0000015	phosphopyruvate hydratase complex	Cellular Component	8	13	1	0.0271863	gene-LOC547752;gene-LOC100809646;gene-LOC100787663;gene-LOC100787451;gene-LOC100803925;gene-LOC100811084;gene-LOC100806538;gene-LOC100789125
GO:0070652	HAUS complex	Cellular Component	7	11	1	0.0310188	gene-LOC100786040;gene-LOC100787842;gene-LOC100795686;gene-LOC100807170;gene-LOC100799130;gene-LOC100788724;gene-LOC100791067
GO:0030658	transport vesicle membrane	Cellular Component	7	11	1	0.0310188	gene-LOC100806586;Glycine_max_newGene_5574;gene-LOC100815455;gene-LOC100777657;gene-LOC100795535;gene-LOC100814913;gene-LOC100796729
GO:0000818	nuclear MIS12/MIND complex	Cellular Component	3	3	1	0.0328312	Glycine_max_newGene_88;gene-LOC100786747;gene-LOC100305953
GO:0035371	microtubule plus-end	Cellular Component	3	3	1	0.0328312	gene-LOC100802923;gene-LOC100808026;gene-LOC100805687
GO:0005814	centriole	Cellular Component	3	3	1	0.0328312	gene-LOC100818906;gene-LOC100817836;gene-LOC100527230
GO:0071819	DUBm complex	Cellular Component	3	3	1	0.0328312	gene-LOC100500039;gene-LOC100802564;gene-LOC100527713
GO:0005953	CAAX-protein geranylgeranyltransferase complex	Cellular Component	3	3	1	0.0328312	gene-LOC100788428;gene-LOC100783982;gene-LOC100811502
GO:0070822	Sin3-type complex	Cellular Component	3	3	1	0.0328312	gene-LOC100804681;gene-LOC100786705;gene-LOC100779296
GO:0001673	male germ cell nucleus	Cellular Component	3	3	1	0.0328312	gene-LOC100811082;gene-LOC102669631;gene-LOC100792669
GO:0033263	CORVET complex	Cellular Component	3	3	1	0.0328312	gene-LOC100808578;gene-LOC100793279;gene-LOC100778100
GO:0033186	CAF-1 complex	Cellular Component	3	3	1	0.0328312	gene-LOC100811035;gene-LOC100784411;gene-LOC100802884
GO:0045273	respiratory chain complex II	Cellular Component	3	3	1	0.0328312	gene-LOC100777981;gene-LOC100527337;gene-LOC100527668
GO:0030121	AP-1 adaptor complex	Cellular Component	3	3	1	0.0328312	gene-LOC100817075;gene-LOC100815152;gene-LOC100802164
GO:0043073	germ cell nucleus	Cellular Component	3	3	1	0.0328312	gene-LOC100792669;gene-LOC100811082;gene-LOC102669631
GO:0009941	chloroplast envelope	Cellular Component	63	161	1	0.0332287	gene-LOC100795673;gene-HRBP1;gene-LOC100527463;gene-LOC100499940;gene-LOC100780899;gene-DGD2;gene-LOC100786455;gene-LOC100801384;gene-LOC100817063;gene-LOC100527004;gene-LOC100813087;gene-CAB3;gene-LOC100813325;gene-LOC100820508;gene-LOC100785945;gene-AOS2;gene-GMIQD9;gene-LOC100799729;gene-LOC100814366;gene-LOC100801846;gene-LOC100799926;gene-LOC100790239;gene-LOC100793455;gene-LOC100807024;gene…
GO:0030173	integral component of Golgi membrane	Cellular Component	18	38	1	0.0345332	gene-LOC100787783;Glycine_max_newGene_11103;gene-LOC100784316;gene-LOC100789415;gene-LOC100812669;gene-LOC100811913;gene-LOC100500358;gene-LOC100499702;gene-LOC100803636;gene-LOC100785456;gene-LOC100527655;gene-LOC100805147;gene-LOC100306642;gene-LOC100801486;gene-LOC100818599;gene-LOC100818014;gene-LOC100787400;gene-LOC100815011
GO:0010005	cortical microtubule, transverse to long axis	Cellular Component	6	9	1	0.0348812	gene-LOC100775602;gene-LOC100801246;gene-LOC100305520;gene-LOC100804845;gene-LOC100500021;gene-LOC100306053
GO:0005665	DNA-directed RNA polymerase II, core complex	Cellular Component	12	23	1	0.0355336	gene-LOC100815934;gene-LOC100816388;gene-LOC100792565;gene-LOC100780342;gene-LOC100779425;gene-LOC100814493;gene-LOC100499860;gene-LOC100806909;gene-LOC100806190;gene-LOC100527865;gene-LOC100779047;gene-LOC100500417
GO:0005687	U4 snRNP	Cellular Component	5	7	1	0.0381319	gene-LOC100306304;gene-LOC100816107;gene-LOC100786807;gene-LOC100500333;gene-LOC100807929
GO:0030864	cortical actin cytoskeleton	Cellular Component	5	7	1	0.0381319	gene-LOC100793194;gene-LOC100780824;gene-LOC100805150;gene-LOC100805073;gene-LOC100794702
GO:0009543	chloroplast thylakoid lumen	Cellular Component	5	7	1	0.0381319	gene-LOC100797323;gene-LOC100500352;gene-LOC100527183;gene-LOC100787080;gene-LOC100777979
GO:0000276	mitochondrial proton-transporting ATP synthase complex, coupling factor F(o)	Cellular Component	4	5	1	0.0390942	gene-LOC100499783;gene-LOC100527703;gene-LOC100500400;gene-LOC100306205
GO:0031463	Cul3-RING ubiquitin ligase complex	Cellular Component	11	21	1	0.0421302	gene-LOC100780827;Glycine_max_newGene_2613;gene-LOC100786905;Glycine_max_newGene_6;gene-LOC100788124;gene-LOC100796811;gene-LOC100820159;gene-LOC100781966;gene-LOC100796892;gene-LOC100775687;gene-LOC100787262
GO:0000176	nuclear exosome (RNase complex)	Cellular Component	11	21	1	0.0421302	gene-LOC100782953;gene-LOC100818324;gene-LOC100819105;gene-LOC100815140;gene-LOC100801484;gene-LOC100809941;gene-LOC100816271;gene-LOC100776087;gene-LOC100804872;gene-LOC100801931;gene-LOC100806953
GO:0019866	organelle inner membrane	Cellular Component	13	26	1	0.0428257	gene-LOC100499828;gene-LOC100527668;gene-LOC100801384;gene-LOC100527337;gene-LOC100811998;gene-LOC100500620;gene-LOC100499736;gene-LOC100796187;gene-LOC100798702;gene-LOC102660758;gene-LOC100500382;gene-LOC100785176;gene-LOC100799729
GO:0005854	nascent polypeptide-associated complex	Cellular Component	7	12	1	0.054162	gene-LOC100791967;gene-LOC100500056;gene-LOC100527254;gene-LOC100791446;gene-LOC100499943;gene-LOC100500153;gene-LOC100779560
GO:0012507	ER to Golgi transport vesicle membrane	Cellular Component	9	17	1	0.0596649	gene-LOC100816145;gene-LOC100795077;gene-LOC100796579;gene-LOC100795053;gene-LOC100811102;gene-LOC100815385;gene-LOC100780765;gene-LOC100786429;gene-LOC100500114
GO:0016272	prefoldin complex	Cellular Component	9	17	1	0.0596649	gene-LOC100499907;gene-LOC100306096;gene-LOC100306488;gene-LOC100799098;gene-LOC100818633;gene-LOC100306048;gene-LOC100812005;gene-LOC100499735;gene-LOC100499849
GO:0017119	Golgi transport complex	Cellular Component	11	22	1	0.0604563	gene-LOC100820115;gene-LOC100811682;gene-LOC100788817;gene-LOC100794254;gene-LOC100788776;gene-LOC100780045;gene-LOC100783456;gene-LOC100800639;gene-LOC100807514;gene-LOC100776278;gene-LOC100808943
GO:0031976	plastid thylakoid	Cellular Component	25	59	1	0.0608966	gene-LOC100806845;gene-LOC100800917;gene-HRBP1;gene-LOC100305905;gene-LOC100785945;gene-LOC100783342;gene-LOC100807942;gene-LOC100797443;gene-CAS;gene-LOC100306679;gene-LOC100780001;gene-LOC100499940;gene-LOC100810796;gene-LOC100784482;gene-LOC100790239;gene-LOC100803715;gene-LOC100801140;gene-LOC100817063;gene-LOC100500352;gene-LOC100805220;gene-LOC100797102;gene-LOC100780482;gene-LOC100813325;g…
GO:0030904	retromer complex	Cellular Component	6	10	1	0.0638818	gene-LOC100813795;gene-LOC100816408;gene-LOC100811902;gene-LOC100813307;gene-LOC100306173;gene-LOC100778365
GO:0000922	spindle pole	Cellular Component	8	15	1	0.0713359	gene-LOC100778670;gene-LOC100795622;gene-LOC100795585;gene-LOC100786441;Glycine_max_newGene_10983;gene-LOC100782299;gene-LOC100819794;gene-LOC100780017
GO:0005784	Sec61 translocon complex	Cellular Component	5	8	1	0.075144	gene-LOC100500335;gene-LOC100795313;gene-LOC100815435;gene-LOC100790740;gene-LOC100814692
GO:0055038	recycling endosome membrane	Cellular Component	5	8	1	0.075144	gene-LOC100777657;gene-LOC100796729;gene-LOC100814913;gene-LOC100806586;gene-LOC100815455
GO:0098803	respiratory chain complex	Cellular Component	5	8	1	0.075144	gene-LOC100527337;gene-LOC100500620;gene-LOC100499828;gene-LOC100500382;gene-LOC100527668
GO:0046695	SLIK (SAGA-like) complex	Cellular Component	5	8	1	0.075144	gene-LOC100803416;gene-LOC100781682;gene-LOC100788777;gene-LOC100783444;gene-LOC100799998
GO:0005968	Rab-protein geranylgeranyltransferase complex	Cellular Component	5	8	1	0.075144	gene-LOC100783193;gene-LOC100780581;gene-LOC100807900;gene-LOC100777273;gene-LOC100793642
GO:1990204	oxidoreductase complex	Cellular Component	5	8	1	0.075144	gene-LOC100527668;gene-LOC100500382;gene-LOC100499828;gene-LOC100500620;gene-LOC100527337
GO:0032588	trans-Golgi network membrane	Cellular Component	5	8	1	0.075144	gene-LOC100777657;gene-LOC100796729;gene-LOC100814913;gene-LOC100815455;gene-LOC100806586
GO:0055035	plastid thylakoid membrane	Cellular Component	22	52	1	0.0767168	gene-LOC100817063;gene-LOC100801140;gene-LOC100797102;gene-LOC100805220;gene-LOC100500352;gene-LOC100305959;gene-LOC100791634;gene-HRBP1;gene-LOC100806845;gene-LOC100797443;gene-LOC100807942;gene-LOC100783342;gene-LOC100785945;gene-LOC100305905;gene-LOC100780001;gene-LOC100306679;gene-CAS;gene-LOC100803715;gene-LOC100790239;gene-LOC100784482;gene-LOC100810796;gene-LOC100499940
GO:0031967	organelle envelope	Cellular Component	44	114	1	0.0810556	gene-LOC100781925;gene-LOC100780721;gene-LOC100817063;gene-LOC100801140;gene-LOC100527004;gene-LOC100813325;gene-LOC100527337;gene-LOC100797443;gene-HRBP1;gene-LOC100800917;gene-LOC100499828;gene-LOC100499940;gene-DGD2;gene-LOC100798702;gene-LOC100777005;gene-LOC100811998;gene-LOC100801384;gene-LOC102660758;gene-LOC100500382;gene-LOC100785176;gene-LOC100782080;Glycine_max_newGene_1875;gene-LOC100…
GO:0031975	envelope	Cellular Component	45	117	1	0.082544	gene-LOC100799729;gene-GMIQD9;gene-MAF1;gene-LOC100785945;gene-LOC100804911;gene-LOC100499736;gene-LOC100806711;gene-LOC100793455;gene-LOC100795961;gene-LOC100810969;gene-LOC100810796;gene-LOC100784482;gene-LOC100790239;gene-LOC100527668;gene-LOC100785176;gene-LOC100500382;gene-LOC102660758;gene-LOC100791162;gene-LOC100500620;gene-LOC100786069;gene-GMIQD17;gene-LOC100796187;gene-LOC100777398;gene…
GO:0044436	thylakoid part	Cellular Component	24	58	1	0.0844233	gene-LOC100817063;gene-LOC100801140;gene-LOC100791634;gene-LOC100305959;gene-LOC100797102;gene-LOC100805220;gene-LOC100500352;gene-LOC100807942;gene-LOC100797443;gene-LOC100783342;gene-LOC100305905;gene-LOC100785945;gene-LOC100806845;gene-HRBP1;gene-LOC100817380;gene-LOC100790239;gene-LOC100784482;gene-LOC100803715;gene-LOC100499940;gene-LOC100810796;gene-LOC100780001;gene-LOC100306679;gene-LOC10…
GO:0005758	mitochondrial intermembrane space	Cellular Component	7	13	1	0.0856337	gene-LOC100500530;gene-LOC100818844;gene-LOC100499929;gene-LOC100305988;gene-LOC100791637;gene-LOC100305937;gene-LOC100500015
GO:0005834	heterotrimeric G-protein complex	Cellular Component	7	13	1	0.0856337	gene-GPA2;gene-LOC100794776;gene-LOC100811645;gene-GPA1;gene-LOC100794534;gene-LOC100781223;gene-LOC100787237
GO:0009504	cell plate	Cellular Component	4	6	1	0.0876791	gene-LOC100777051;gene-LOC100783004;gene-LOC100806698;gene-LOC100810746
GO:0051233	spindle midzone	Cellular Component	4	6	1	0.0876791	gene-LOC100802923;gene-LOC100775802;gene-LOC100808026;gene-LOC100805687
GO:0031083	BLOC-1 complex	Cellular Component	4	6	1	0.0876791	gene-LOC100781060;gene-LOC100527746;gene-LOC100305965;gene-LOC100782608
GO:1990726	Lsm1-7-Pat1 complex	Cellular Component	4	6	1	0.0876791	gene-LOC100306498;gene-LOC100812441;gene-LOC100527929;gene-LOC100807381
GO:0031410	cytoplasmic vesicle	Cellular Component	36	92	1	0.089593	Glycine_max_newGene_4077;gene-LOC100795465;gene-LOC100801068;gene-LOC100818891;gene-LOC100796048;gene-LOC100799031;gene-LOC100777051;gene-LOC100784648;Glycine_max_newGene_3063;gene-LOC100798550;gene-LOC100815065;gene-LOC100789477;gene-LOC100803222;gene-LOC100170724;gene-LOC100527464;gene-LOC100805035;gene-LOC100810746;gene-LOC100785464;gene-LOC100527158;gene-GMRD22;gene-LOC100783342;gene-LOC10079…
GO:0000124	SAGA complex	Cellular Component	12	26	1	0.0933176	gene-LOC100803416;gene-LOC100807100;gene-LOC100306277;gene-LOC100527713;gene-LOC100788777;gene-LOC100781682;gene-LOC100799998;gene-LOC100783444;gene-LOC100526864;gene-LOC100500039;gene-LOC100781365;gene-LOC100527659
GO:0036449	microtubule minus-end	Cellular Component	3	4	1	0.0997939	gene-LOC100807370;gene-LOC100794002;gene-LOC100818900
GO:0030137	COPI-coated vesicle	Cellular Component	3	4	1	0.0997939	gene-LOC100780122;gene-LOC100785260;gene-LOC100778815
GO:1990745	EARP complex	Cellular Component	3	4	1	0.0997939	gene-LOC100779149;gene-LOC100818891;gene-LOC100788476
GO:0045239	tricarboxylic acid cycle enzyme complex	Cellular Component	3	4	1	0.0997939	gene-LOC100813552;gene-LOC100819617;gene-LOC100810850
GO:0098562	cytoplasmic side of membrane	Cellular Component	3	4	1	0.0997939	gene-LOC100794002;gene-LOC100807370;gene-LOC100818900
GO:0008274	gamma-tubulin ring complex	Cellular Component	3	4	1	0.0997939	gene-LOC100782299;gene-LOC100799119;Glycine_max_newGene_10983
GO:1990752	microtubule end	Cellular Component	3	4	1	0.0997939	gene-LOC100807370;gene-LOC100794002;gene-LOC100818900
GO:0005751	mitochondrial respiratory chain complex IV	Cellular Component	2	2	1	0.102544	gene-LOC100527245;gene-LOC100499808
GO:0031416	NatB complex	Cellular Component	2	2	1	0.102544	gene-LOC100800201;gene-LOC100808947
GO:0036266	Cdc48p-Npl4p-Vms1p AAA ATPase complex	Cellular Component	2	2	1	0.102544	gene-LOC100527709;gene-LOC100808912
GO:0009337	sulfite reductase complex (NADPH)	Cellular Component	2	2	1	0.102544	gene-LOC100790764;gene-GMSIR
GO:0001669	acrosomal vesicle	Cellular Component	2	2	1	0.102544	gene-LOC100782829;gene-LOC100814694
GO:0005753	mitochondrial proton-transporting ATP synthase complex	Cellular Component	2	2	1	0.102544	gene-LOC100789705;gene-LOC100797948
GO:0005828	kinetochore microtubule	Cellular Component	2	2	1	0.102544	gene-LOC100814451;gene-LOC100785510
GO:0045257	succinate dehydrogenase complex (ubiquinone)	Cellular Component	2	2	1	0.102544	gene-LOC100527337;gene-LOC100527668
GO:0045281	succinate dehydrogenase complex	Cellular Component	2	2	1	0.102544	gene-LOC100527337;gene-LOC100527668
GO:0002177	manchette	Cellular Component	2	2	1	0.102544	gene-LOC100782829;gene-LOC100814694
GO:0000274	mitochondrial proton-transporting ATP synthase, stator stalk	Cellular Component	2	2	1	0.102544	gene-LOC100306184;gene-LOC100500032
GO:0097223	sperm part	Cellular Component	2	2	1	0.102544	gene-LOC100814694;gene-LOC100782829
GO:0017177	glucosidase II complex	Cellular Component	2	2	1	0.102544	gene-LOC100811132;gene-LOC100306278
GO:0090661	box H/ACA telomerase RNP complex	Cellular Component	2	2	1	0.102544	gene-LOC100306376;gene-LOC100500467
GO:0045283	fumarate reductase complex	Cellular Component	2	2	1	0.102544	gene-LOC100527668;gene-LOC100527337
GO:0017059	serine C-palmitoyltransferase complex	Cellular Component	2	2	1	0.102544	gene-LOC100803194;gene-LOC100789635
GO:0000326	protein storage vacuole	Cellular Component	2	2	1	0.102544	gene-LOC100806829;gene-LOC100789387
GO:0098572	stromal side of plastid thylakoid membrane	Cellular Component	2	2	1	0.102544	gene-LOC100801140;gene-LOC100790239
GO:0033176	proton-transporting V-type ATPase complex	Cellular Component	2	2	1	0.102544	gene-LOC100808847;gene-LOC100801612
GO:0035859	Seh1-associated complex	Cellular Component	2	2	1	0.102544	gene-LOC100780788;gene-LOC100812825
GO:1990070	TRAPPI protein complex	Cellular Component	2	2	1	0.102544	gene-LOC100500147;gene-LOC100527008
GO:0098800	inner mitochondrial membrane protein complex	Cellular Component	6	11	1	0.103318	gene-LOC100499828;gene-LOC100500382;gene-LOC100527668;gene-LOC100499736;gene-LOC100500620;gene-LOC100527337
GO:0032153	cell division site	Cellular Component	8	16	1	0.10377	gene-LOC100808722;gene-LOC100801208;gene-LOC100797297;gene-LOC100786112;gene-LOC100785793;gene-LOC100783495;gene-LOC100809043;gene-LOC100805150
GO:0034357	photosynthetic membrane	Cellular Component	22	54	1	0.110896	gene-LOC100780001;gene-LOC100306679;gene-CAS;gene-LOC100790239;gene-LOC100784482;gene-LOC100803715;gene-LOC100499940;gene-LOC100810796;gene-LOC100806845;gene-HRBP1;gene-LOC100807942;gene-LOC100797443;gene-LOC100783342;gene-LOC100305905;gene-LOC100785945;gene-LOC100797102;gene-LOC100805220;gene-LOC100500352;gene-LOC100791634;gene-LOC100305959;gene-LOC100817063;gene-LOC100801140
GO:0005741	mitochondrial outer membrane	Cellular Component	15	35	1	0.117661	gene-LOC100170728;gene-LOC100790270;gene-LOC100777928;gene-LOC100784432;gene-LOC100170756;gene-LOC100817833;gene-LOC100787662;gene-LOC100797369;gene-LOC100790578;gene-LOC100796059;gene-LOC100796607;gene-LOC100818855;gene-LOC100805016;gene-LOC100777791;gene-LOC100787061
GO:0090568	nuclear transcriptional repressor complex	Cellular Component	7	14	1	0.125373	Glycine_max_newGene_7864;gene-LOC100816128;gene-LOC100785502;gene-LOC100815645;gene-LOC100780157;gene-LOC100819331;gene-LOC100816714
GO:0008541	proteasome regulatory particle, lid subcomplex	Cellular Component	7	14	1	0.125373	gene-LOC100500106;gene-LOC100814379;gene-LOC100793480;gene-LOC100787034;gene-LOC100793857;gene-LOC100306674;gene-LOC100499672
GO:0031429	box H/ACA snoRNP complex	Cellular Component	5	9	1	0.125472	gene-LOC100499993;gene-LOC100306376;gene-LOC100806355;gene-LOC100810689;gene-LOC100500467
GO:0009898	cytoplasmic side of plasma membrane	Cellular Component	5	9	1	0.125472	gene-LOC100818900;gene-LOC100807370;gene-LOC100794002;gene-LOC100802499;gene-LOC100803741
GO:0005771	multivesicular body	Cellular Component	10	22	1	0.131832	gene-LOC100499888;gene-LOC100806599;gene-LOC100793101;gene-LOC100527083;gene-LOC100795465;gene-LOC100780989;gene-LOC100777179;gene-LOC100795747;gene-LOC100306343;gene-LOC100792384
GO:0099568	cytoplasmic region	Cellular Component	11	25	1	0.142821	gene-LOC100807370;gene-LOC100794002;gene-LOC100797456;gene-LOC100805150;gene-LOC100813969;gene-LOC100780150;gene-LOC100784351;gene-LOC100818900;gene-LOC100798109;gene-LOC100796864;gene-LOC100808445
GO:0042765	GPI-anchor transamidase complex	Cellular Component	8	17	1	0.142975	gene-LOC100791836;gene-LOC112997672;gene-LOC100794356;gene-LOC100805764;gene-LOC100777192;gene-LOC100794836;gene-LOC100775816;gene-LOC100813959
GO:0016459	myosin complex	Cellular Component	15	36	1	0.144387	gene-LOC100781736;gene-LOC100791070;gene-LOC100802614;gene-LOC100782618;gene-LOC100814445;gene-LOC100786418;gene-LOC100819436;gene-LOC100796845;gene-LOC100818959;gene-LOC100786893;gene-LOC100804820;gene-LOC100801124;gene-LOC100812525;gene-LOC100810423;gene-LOC100802074
GO:0005762	mitochondrial large ribosomal subunit	Cellular Component	12	28	1	0.152298	gene-LOC100787337;gene-LOC100305667;gene-LOC100809386;gene-LOC100813518;gene-LOC100800404;gene-LOC100809931;gene-LOC100793854;gene-LOC100527286;gene-LOC100527927;gene-LOC100789663;gene-LOC100799712;gene-LOC100792418
GO:0031966	mitochondrial membrane	Cellular Component	12	28	1	0.152298	gene-LOC100809667;gene-LOC100527668;gene-LOC100820456;gene-LOC100499828;gene-LOC100816581;gene-LOC100798702;gene-LOC100527337;gene-LOC100499736;gene-LOC100788729;gene-LOC100500620;gene-LOC100500382;gene-LOC100802540
GO:0098798	mitochondrial protein complex	Cellular Component	6	12	1	0.152473	gene-LOC100527668;gene-LOC100500382;gene-LOC100499828;gene-LOC100527337;gene-LOC100500620;gene-LOC100499736
GO:0001401	mitochondrial sorting and assembly machinery complex	Cellular Component	6	12	1	0.152473	gene-LOC100804873;gene-LOC100785408;gene-LOC100820409;gene-LOC100802876;gene-LOC100786767;gene-LOC100801556
GO:0031965	nuclear membrane	Cellular Component	6	12	1	0.152473	gene-LOC100810969;gene-LOC100782080;gene-LOC100804911;gene-LOC100791162;gene-LOC100783752;gene-MAF1
GO:0044455	mitochondrial membrane part	Cellular Component	6	12	1	0.152473	gene-LOC100527668;gene-LOC100499828;gene-LOC100500382;gene-LOC100527337;gene-LOC100499736;gene-LOC100500620
GO:0000839	Hrd1p ubiquitin ligase ERAD-L complex	Cellular Component	4	7	1	0.153742	gene-LOC100802618;gene-LOC100785303;gene-LOC100791885;gene-LOC100783754
GO:0034663	endoplasmic reticulum chaperone complex	Cellular Component	4	7	1	0.153742	gene-GMBIP2;gene-LOC547838;gene-LOC100803843;gene-GMBIP4
GO:0033178	proton-transporting two-sector ATPase complex, catalytic domain	Cellular Component	4	7	1	0.153742	gene-LOC100499818;gene-LOC100500452;gene-LOC106794127;gene-LOC111064655
GO:0070390	transcription export complex 2	Cellular Component	4	7	1	0.153742	gene-LOC100527713;gene-LOC100777150;gene-LOC100802804;gene-LOC100500039
GO:0005685	U1 snRNP	Cellular Component	10	23	1	0.169162	gene-LOC100786807;gene-LOC100777062;gene-LOC100795821;gene-LOC100816107;gene-LOC100792526;gene-LOC100306304;gene-LOC100777711;gene-LOC100793888;gene-LOC100500333;gene-LOC100807929
GO:0005746	mitochondrial respiratory chain	Cellular Component	7	15	1	0.172655	gene-LOC100500620;gene-LOC100527337;gene-LOC100527668;gene-LOC100500524;gene-LOC100499828;gene-LOC100500382;gene-LOC100526898
GO:0016602	CCAAT-binding factor complex	Cellular Component	7	15	1	0.172655	gene-GMNF-YA09;gene-GMNF-YA15;gene-GMNF-YA08;gene-GMNF-YA05;gene-GMNF-YA07;gene-GMNF-YA20;gene-GMNF-YA16
GO:0005774	vacuolar membrane	Cellular Component	64	180	1	0.173252	gene-LOC100777981;gene-LOC100500014;gene-LOC100808066;gene-LOC100811871;gene-DMT1;gene-LOC100793094;gene-LOC100794945;gene-LOC100806054;gene-LOC100816431;gene-LOC100779757;gene-HIR1;gene-LOC100795309;gene-LOC100790986;gene-GMNRAMP1A;gene-LOC100804982;gene-LOC100787215;gene-LOC100777998;gene-LOC100780167;gene-LOC100778388;gene-LOC100803841;gene-LOC100783342;gene-LOC100790329;gene-LOC100797102;gene…
GO:0019005	SCF ubiquitin ligase complex	Cellular Component	42	115	1	0.174045	Glycine_max_newGene_6;gene-LOC100786905;gene-LOC100820308;gene-LOC100819793;gene-FKF1;gene-LOC100787875;Glycine_max_newGene_4097;gene-LOC100805418;gene-LOC102660607;gene-LOC100811082;gene-LOC100787262;gene-LOC100812999;gene-LOC100818928;gene-LOC100802904;gene-LOC100782842;gene-LOC100788163;gene-LOC100808150;gene-LOC100527591;gene-LOC100812253;gene-LOC100813260;gene-LOC100798274;gene-LOC100775687;…
GO:0046658	anchored component of plasma membrane	Cellular Component	70	198	1	0.175093	gene-LOC100777292;gene-LOC100815779;gene-LOC100785994;gene-LOC100781673;gene-LOC100818802;gene-LOC100796552;gene-LOC100810568;gene-LOC100306063;gene-LOC100811710;gene-LOC100808966;gene-LOC100788637;gene-NDR1A;gene-LOC100810878;gene-LOC100527928;gene-LOC100527857;gene-LOC100794910;gene-LOC100780407;gene-LOC100805178;gene-LOC100812905;gene-LOC100809473;gene-LOC100814766;gene-LOC100784409;gene-LOC10…
GO:0000407	pre-autophagosomal structure	Cellular Component	8	18	1	0.18829	gene-ATG6;gene-LOC100790126;gene-LOC100778254;gene-LOC100809347;gene-LOC100817169;gene-LOC547983;gene-GMATG7;gene-LOC100813062
GO:1990072	TRAPPIII protein complex	Cellular Component	3	5	1	0.190843	gene-LOC100813062;gene-LOC100500147;gene-LOC100527008
GO:0005948	acetolactate synthase complex	Cellular Component	3	5	1	0.190843	gene-LOC100779210;gene-LOC100810297;gene-LOC100798203
GO:0002189	ribose phosphate diphosphokinase complex	Cellular Component	3	5	1	0.190843	gene-LOC100812868;gene-LOC100799836;gene-LOC100794730
GO:0071818	BAT3 complex	Cellular Component	3	5	1	0.190843	gene-LOC100805783;gene-LOC100780059;gene-LOC100811870
GO:0000419	DNA-directed RNA polymerase V complex	Cellular Component	3	5	1	0.190843	gene-LOC100500417;gene-LOC100809510;gene-LOC100500129
GO:0005965	protein farnesyltransferase complex	Cellular Component	3	5	1	0.190843	gene-GMERA1A;gene-LOC100811502;gene-GMERA1B
GO:0031209	SCAR complex	Cellular Component	3	5	1	0.190843	gene-LOC100780997;gene-LOC100814483;gene-LOC100500536
GO:0044431	Golgi apparatus part	Cellular Component	9	21	1	0.200737	gene-LOC100799031;gene-LOC100809598;gene-BURP2;gene-LOC100808943;gene-LOC100815065;gene-LOC100818891;gene-LOC100783342;gene-GMRD22;gene-LOC100170724
GO:0098796	membrane protein complex	Cellular Component	9	21	1	0.200737	gene-LOC100500382;gene-LOC100810796;gene-LOC100499828;gene-LOC100784482;gene-LOC100527668;gene-LOC100527337;gene-LOC100500620;gene-LOC100499736;gene-LOC100305982
GO:0042651	thylakoid membrane	Cellular Component	23	61	1	0.205987	gene-LOC100801140;gene-LOC100817063;gene-LOC100805220;gene-LOC100500352;gene-LOC100797102;gene-LOC100791634;gene-LOC100305959;gene-LOC100806845;gene-HRBP1;gene-LOC100305905;gene-LOC100796878;gene-LOC100785945;gene-LOC100783342;gene-LOC100807942;gene-LOC100797443;gene-CAS;gene-LOC100306679;gene-LOC100780001;gene-LOC100499940;gene-LOC100810796;gene-LOC100784482;gene-LOC100790239;gene-LOC100803715
GO:0016471	vacuolar proton-transporting V-type ATPase complex	Cellular Component	6	13	1	0.209764	gene-LOC100499803;gene-LOC100305477;gene-LOC100793301;gene-LOC100800799;gene-LOC100306550;gene-LOC100810062
GO:0030117	membrane coat	Cellular Component	6	13	1	0.209764	Glycine_max_newGene_4508;gene-LOC100306517;gene-LOC100306122;Glycine_max_newGene_8473;gene-LOC100781795;gene-LOC100499666
GO:0031982	vesicle	Cellular Component	38	106	1	0.227391	gene-LOC100814144;gene-LOC100786418;gene-LOC100819436;gene-LOC100795978;gene-BURP2;gene-LOC100809598;gene-LOC100804956;gene-LOC100804267;gene-LOC100782829;gene-LOC100802614;gene-LOC100807251;gene-LOC100783004;gene-LOC100814694;gene-LOC100794919;gene-LOC100783342;gene-LOC100777111;gene-GMRD22;gene-LOC100820002;gene-LOC100801124;gene-LOC100804820;gene-LOC100786893;gene-LOC100170724;gene-LOC10081506…
GO:1990234	transferase complex	Cellular Component	51	145	1	0.232315	gene-LOC100807836;gene-LOC100804138;gene-LOC100777561;gene-LOC100818900;gene-GMAFB3B;gene-LOC100807370;Glycine_max_newGene_2613;gene-LOC100809598;gene-LOC100801911;gene-LOC100796864;gene-LOC100786905;Glycine_max_newGene_6;gene-LOC100305982;gene-LOC100796811;gene-LOC100788124;gene-LOC100795961;gene-LOC100806711;gene-LOC100811082;gene-LOC100820024;gene-LOC100813260;gene-LOC100806443;gene-LOC1007940…
GO:0009317	acetyl-CoA carboxylase complex	Cellular Component	4	8	1	0.23234	gene-ACCB-1;gene-ACCA-2;gene-ACCA-3;gene-ACCB-2
GO:0035097	histone methyltransferase complex	Cellular Component	8	19	1	0.238703	gene-LOC100798611;gene-LOC100804138;gene-LOC100306287;gene-LOC100810972;gene-LOC100775813;gene-LOC100794027;gene-LOC100812602;gene-LOC100775271
GO:0043626	PCNA complex	Cellular Component	2	3	1	0.241968	gene-LOC100817651;gene-LOC548079
GO:0070939	Dsl1/NZR complex	Cellular Component	2	3	1	0.241968	gene-LOC100793116;gene-LOC100817178
GO:0043240	Fanconi anaemia nuclear complex	Cellular Component	2	3	1	0.241968	gene-LOC100817363;gene-LOC100801568
GO:0005797	Golgi medial cisterna	Cellular Component	2	3	1	0.241968	gene-LOC100500645;gene-GOS12
GO:0045254	pyruvate dehydrogenase complex	Cellular Component	2	3	1	0.241968	gene-LOC100778218;gene-LOC100804938
GO:0005761	mitochondrial ribosome	Cellular Component	2	3	1	0.241968	gene-LOC100812176;gene-LOC100500208
GO:0042406	extrinsic component of endoplasmic reticulum membrane	Cellular Component	2	3	1	0.241968	gene-LOC100527305;gene-LOC100306518
GO:0032389	MutLalpha complex	Cellular Component	2	3	1	0.241968	gene-LOC100794788;gene-LOC100793891
GO:0070761	pre-snoRNP complex	Cellular Component	2	3	1	0.241968	gene-LOC100785007;gene-LOC100801258
GO:0097361	CIA complex	Cellular Component	2	3	1	0.241968	gene-LOC100778826;gene-LOC100782823
GO:0070449	elongin complex	Cellular Component	2	3	1	0.241968	gene-LOC100500097;Glycine_max_newGene_2506
GO:0005868	cytoplasmic dynein complex	Cellular Component	2	3	1	0.241968	gene-LOC100527842;gene-LOC100305908
GO:0031985	Golgi cisterna	Cellular Component	2	3	1	0.241968	gene-LOC100796823;gene-LOC100802162
GO:0042643	actomyosin, actin portion	Cellular Component	2	3	1	0.241968	gene-LOC100805073;gene-LOC100794702
GO:0005720	nuclear heterochromatin	Cellular Component	2	3	1	0.241968	gene-LOC100801535;gene-LOC100786796
GO:0070765	gamma-secretase complex	Cellular Component	2	3	1	0.241968	gene-LOC102665782;gene-LOC106798930
GO:0000229	cytoplasmic chromosome	Cellular Component	2	3	1	0.241968	gene-LOC100790239;gene-LOC100801140
GO:0000439	core TFIIH complex	Cellular Component	5	11	1	0.256851	gene-LOC100776751;gene-LOC100785713;gene-LOC100793016;gene-LOC100776016;gene-LOC100810574
GO:0005689	U12-type spliceosomal complex	Cellular Component	11	28	1	0.262542	gene-LOC100807978;gene-LOC100527203;gene-LOC100815924;gene-LOC100814307;gene-LOC100500333;gene-LOC100306498;gene-LOC100814109;Glycine_max_newGene_4071;gene-LOC100819176;gene-LOC100807381;Glycine_max_newGene_8065
GO:0000148	1,3-beta-D-glucan synthase complex	Cellular Component	11	28	1	0.262542	gene-LOC100777209;gene-LOC100786527;gene-LOC100780527;gene-LOC100811121;gene-LOC100784105;gene-LOC100809371;gene-LOC100811473;gene-LOC100808120;gene-LOC100801607;gene-LOC100778380;gene-LOC100787540
GO:0032580	Golgi cisterna membrane	Cellular Component	6	14	1	0.273057	gene-LOC100775878;gene-LOC100792811;gene-LOC100792300;gene-LOC100803305;gene-LOC100776065;gene-LOC100799776
GO:0005742	mitochondrial outer membrane translocase complex	Cellular Component	6	14	1	0.273057	gene-LOC100783402;gene-LOC106798696;gene-LOC100798528;gene-LOC100527313;gene-LOC100800713;gene-LOC100775949
GO:0009528	plastid inner membrane	Cellular Component	6	14	1	0.273057	gene-LOC102660758;gene-LOC100801384;gene-LOC100811998;gene-LOC100785176;gene-LOC100796187;gene-LOC100799729
GO:0009706	chloroplast inner membrane	Cellular Component	15	40	1	0.278805	gene-LOC100785176;gene-LOC100787910;gene-LOC100786309;gene-LOC102660758;gene-LOC100796187;gene-LOC100791489;gene-LOC100793031;gene-LOC100799729;gene-LOC100799853;gene-LOC100791540;gene-LOC100811998;gene-LOC100801384;gene-LOC100776009;gene-LOC100783806;gene-LOC100780872
GO:0000815	ESCRT III complex	Cellular Component	7	17	1	0.284513	gene-LOC100793101;gene-LOC100499888;gene-LOC100795747;gene-LOC100777179;gene-LOC100306343;gene-LOC100792384;gene-LOC100780989
GO:0098791	Golgi subcompartment	Cellular Component	7	17	1	0.284513	gene-LOC100170724;gene-LOC100815065;gene-GMRD22;gene-LOC100783342;gene-BURP2;gene-LOC100809598;gene-LOC100799031
GO:0009505	plant-type cell wall	Cellular Component	50	145	1	0.289489	gene-LOC100788717;gene-LOC100805839;gene-LOC100802458;gene-LOC100794453;gene-LOC100801565;gene-LOC100819849;gene-LOC100804290;gene-LOC100797313;gene-PRX2;gene-LOC100810716;gene-LOC100795412;gene-LOC547872;gene-LOC100792819;gene-LOC100808552;gene-LOC100812757;gene-LOC100783399;gene-LOC100797001;gene-LOC100785270;gene-LOC100818156;gene-LOC100809501;gene-LOC100819978;gene-LOC100811449;gene-LOC100811…
GO:0005801	cis-Golgi network	Cellular Component	8	20	1	0.29297	gene-LOC100797621;gene-LOC100500020;gene-LOC100527553;Glycine_max_newGene_7655;gene-LOC100306692;gene-LOC100811682;gene-GOS12;gene-LOC100500645
GO:0031968	organelle outer membrane	Cellular Component	8	20	1	0.29297	gene-MAF1;gene-LOC100804911;gene-LOC100499736;gene-LOC100777005;gene-LOC100791162;gene-DGD2;gene-LOC100793455;gene-LOC100782080
GO:0070552	BRISC complex	Cellular Component	3	6	1	0.294008	gene-LOC100781761;gene-LOC100527612;gene-LOC100784991
GO:0005658	alpha DNA polymerase:primase complex	Cellular Component	3	6	1	0.294008	gene-LOC100798779;gene-LOC100806321;gene-LOC100780574
GO:0000814	ESCRT II complex	Cellular Component	3	6	1	0.294008	gene-LOC100803388;gene-LOC100796153;gene-LOC100798066
GO:0035658	Mon1-Ccz1 complex	Cellular Component	3	6	1	0.294008	gene-LOC100815283;gene-LOC100792001;gene-LOC100788425
GO:0031932	TORC2 complex	Cellular Component	3	6	1	0.294008	gene-LOC100816446;gene-LOC100812024;gene-LOC100816558
GO:0032299	ribonuclease H2 complex	Cellular Component	3	6	1	0.294008	gene-LOC100779875;gene-LOC100305835;gene-LOC100500515
GO:1990316	ATG1/ULK1 kinase complex	Cellular Component	3	6	1	0.294008	gene-LOC100816476;gene-LOC100778254;gene-LOC100798585
GO:0030964	NADH dehydrogenase complex	Cellular Component	3	6	1	0.294008	gene-LOC100499828;gene-LOC100500620;gene-LOC100500382
GO:0045271	respiratory chain complex I	Cellular Component	3	6	1	0.294008	gene-LOC100500620;gene-LOC100500382;gene-LOC100499828
GO:0031902	late endosome membrane	Cellular Component	9	23	1	0.299405	gene-LOC100788425;gene-LOC100795077;gene-LOC100816145;gene-LOC100796579;gene-LOC100778100;gene-LOC100780765;gene-LOC100786429;gene-LOC100815385;gene-LOC100793279
GO:0030015	CCR4-NOT core complex	Cellular Component	10	26	1	0.304404	gene-LOC100500357;gene-LOC100806559;gene-LOC100790027;gene-LOC100785965;gene-LOC100781759;gene-LOC100807026;gene-LOC100805583;gene-LOC100776413;gene-LOC100799461;gene-LOC100783415
GO:0000159	protein phosphatase type 2A complex	Cellular Component	13	35	1	0.314002	gene-LOC100798842;gene-LOC100808283;gene-LOC100785874;gene-LOC100795277;gene-LOC100814538;gene-LOC100806230;gene-LOC100781098;gene-LOC100814863;gene-LOC100781390;gene-LOC100775767;gene-LOC100792998;gene-LOC100814349;gene-LOC100775273
GO:0008290	F-actin capping protein complex	Cellular Component	4	9	1	0.317834	gene-LOC100808405;gene-LOC100785640;gene-LOC100816980;gene-LOC100795987
GO:0034425	etioplast envelope	Cellular Component	1	1	1	0.320243	gene-LOC100499736
GO:0005671	Ada2/Gcn5/Ada3 transcription activator complex	Cellular Component	1	1	1	0.320243	gene-LOC100526864
GO:0000111	nucleotide-excision repair factor 2 complex	Cellular Component	1	1	1	0.320243	gene-LOC100818100
GO:1990811	Msd1-Wdr8-Pkl1 complex	Cellular Component	1	1	1	0.320243	gene-LOC100775593
GO:0031501	mannosyltransferase complex	Cellular Component	1	1	1	0.320243	gene-LOC100787801
GO:0071261	Ssh1 translocon complex	Cellular Component	1	1	1	0.320243	gene-LOC100527335
GO:0035657	eRF1 methyltransferase complex	Cellular Component	1	1	1	0.320243	gene-LOC100790739
GO:0032541	cortical endoplasmic reticulum	Cellular Component	1	1	1	0.320243	gene-LOC100813416
GO:0099053	activating signal cointegrator 1 complex	Cellular Component	1	1	1	0.320243	gene-LOC100798202
GO:0005712	chiasma	Cellular Component	1	1	1	0.320243	gene-LOC100794788
GO:0005952	cAMP-dependent protein kinase complex	Cellular Component	1	1	1	0.320243	gene-LOC100781992
GO:0030093	chloroplast photosystem I	Cellular Component	1	1	1	0.320243	gene-LOC100306036
GO:0071942	XPC complex	Cellular Component	1	1	1	0.320243	gene-LOC100818100
GO:0000808	origin recognition complex	Cellular Component	1	1	1	0.320243	gene-LOC100784340
GO:0034426	etioplast membrane	Cellular Component	1	1	1	0.320243	gene-LOC100499736
GO:0055037	recycling endosome	Cellular Component	1	1	1	0.320243	gene-LOC100818891
GO:0005759	mitochondrial matrix	Cellular Component	26	74	1	0.322264	gene-LOC100794972;gene-LOC100790011;gene-LOC100799012;gene-GMGLYII-12;gene-LOC100526856;gene-LOC100804915;gene-LOC100306093;gene-LOC100807487;gene-LOC100802836;gene-LOC100812740;gene-LOC100499624;gene-LOC100804938;gene-LOC100802878;gene-LOC100805556;gene-LOC100778218;gene-LOC100527610;gene-LOC100797340;Glycine_max_newGene_8832;gene-LOC100790069;gene-LOC100780497;gene-LOC100784023;gene-LOC10077518…
GO:0016020	membrane	Cellular Component	547	1681	1	0.326132	gene-LOC100807372;gene-LOC100775619;gene-LOC100818802;gene-LOC100778290;gene-LOC100777929;gene-LOC100813308;gene-LOC100500054;gene-LOC100802179;gene-LOC100815100;gene-LOC100776066;gene-LOC100306531;gene-LOC100804951;gene-LOC100819204;gene-LOC100787157;gene-LOC100789211;gene-LOC100797452;gene-LOC100783004;gene-LOC100802874;gene-LOC100818900;gene-LOC100791801;gene-LOC100791489;gene-CYP77A3;gene-LOC…
GO:0031080	nuclear pore outer ring	Cellular Component	5	12	1	0.331407	gene-LOC100794696;gene-LOC100812825;gene-LOC100778776;gene-LOC100787533;gene-LOC100780788
GO:0035861	site of double-strand break	Cellular Component	5	12	1	0.331407	gene-LOC102665532;gene-LOC100780894;gene-LOC100797086;gene-LOC100789756;gene-LOC100802512
GO:0031461	cullin-RING ubiquitin ligase complex	Cellular Component	38	111	1	0.341467	gene-LOC102669631;gene-LOC100818865;gene-LOC100777871;gene-LOC100781966;gene-LOC100806443;gene-LOC100775687;gene-LOC100797330;gene-LOC100794027;gene-LOC100813260;gene-LOC100797895;gene-LOC100780827;gene-LOC100820024;gene-LOC100819650;gene-LOC100787262;gene-LOC100811082;gene-LOC100818928;gene-LOC100805418;Glycine_max_newGene_4097;gene-LOC100778287;gene-LOC100788124;gene-LOC100796811;gene-LOC100779…
GO:0030312	external encapsulating structure	Cellular Component	19	54	1	0.356671	gene-LOC100813279;gene-LOC100814585;gene-LOC100306133;gene-LOC100818156;gene-LOC100810770;gene-LOC100782090;gene-LOC100811449;gene-LOC100802458;Glycine_max_newGene_4036;gene-LOC100791695;gene-LOC100811400;gene-LOC100797001;gene-LOC100778428;gene-LOC100794117;gene-LOC100810878;gene-LOC100809470;gene-GF14A;gene-LOC100780156;gene-LOC100783399
GO:0015934	large ribosomal subunit	Cellular Component	18	51	1	0.357106	gene-LOC100527698;gene-LOC100811654;gene-LOC100793854;gene-RPL2;gene-LOC100816536;gene-LOC100527293;gene-LOC100806318;gene-LOC100785280;gene-LOC100789663;gene-LOC100802235;gene-LOC100784830;gene-LOC100792247;gene-LOC100499730;gene-LOC100808580;gene-LOC100819391;gene-LOC100786542;gene-LOC100305777;gene-LOC100788996
GO:0005669	transcription factor TFIID complex	Cellular Component	13	36	1	0.357365	gene-LOC100788777;gene-LOC100783444;gene-LOC100803416;gene-LOC100781563;gene-LOC100305481;gene-LOC100805953;gene-LOC100798514;gene-LOC100781682;gene-LOC100799998;gene-LOC100306277;gene-LOC102667709;gene-LOC100785713;gene-LOC100527659
GO:0071821	FANCM-MHF complex	Cellular Component	2	4	1	0.384143	gene-LOC100817363;gene-LOC100801568
GO:0099023	tethering complex	Cellular Component	2	4	1	0.384143	gene-LOC100808943;gene-LOC100818891
GO:0005971	ribonucleoside-diphosphate reductase complex	Cellular Component	2	4	1	0.384143	gene-LOC547948;gene-LOC548020
GO:0043541	UDP-N-acetylglucosamine transferase complex	Cellular Component	2	4	1	0.384143	gene-LOC100527305;gene-LOC100811229
GO:0031515	tRNA (m1A) methyltransferase complex	Cellular Component	2	4	1	0.384143	gene-LOC102665775;gene-LOC100793069
GO:0031465	Cul4B-RING E3 ubiquitin ligase complex	Cellular Component	2	4	1	0.384143	gene-LOC100806443;gene-LOC100811988
GO:0044545	NSL complex	Cellular Component	2	4	1	0.384143	gene-LOC100788061;gene-LOC100786493
GO:0043596	nuclear replication fork	Cellular Component	2	4	1	0.384143	gene-LOC100818807;gene-LOC100797654
GO:0031588	nucleotide-activated protein kinase complex	Cellular Component	2	4	1	0.384143	gene-LOC100778117;gene-LOC100790062
GO:0034708	methyltransferase complex	Cellular Component	2	4	1	0.384143	gene-LOC100804138;gene-LOC100794027
GO:0009512	cytochrome b6f complex	Cellular Component	2	4	1	0.384143	gene-LOC100500243;gene-LOC100306224
GO:0098807	chloroplast thylakoid membrane protein complex	Cellular Component	2	4	1	0.384143	gene-LOC100784482;gene-LOC100810796
GO:0030124	AP-4 adaptor complex	Cellular Component	2	4	1	0.384143	gene-LOC100779276;gene-LOC100780202
GO:0030123	AP-3 adaptor complex	Cellular Component	2	4	1	0.384143	gene-LOC100806345;gene-LOC100802718
GO:0034274	Atg12-Atg5-Atg16 complex	Cellular Component	2	4	1	0.384143	gene-LOC100806054;gene-LOC100527905
GO:0031417	NatC complex	Cellular Component	2	4	1	0.384143	gene-LOC100781652;gene-LOC100806790
GO:0031357	integral component of chloroplast inner membrane	Cellular Component	2	4	1	0.384143	gene-LOC100818147;gene-LOC100801086
GO:0042995	cell projection	Cellular Component	21	61	1	0.389641	gene-LOC100527464;gene-LOC100805035;gene-LOC100818162;gene-LOC100785464;gene-LOC100527158;gene-LOC100499696;gene-LOC100798550;gene-LOC100786477;gene-LOC100789980;gene-LOC100794027;gene-LOC100816870;gene-LOC100790459;gene-LOC100305699;gene-LOC100803222;gene-LOC100815100;gene-LOC100807384;gene-LOC100816663;gene-LOC100790103;gene-ROP10;gene-LOC100813969;gene-LOC100781737
GO:0030956	glutamyl-tRNA(Gln) amidotransferase complex	Cellular Component	3	7	1	0.399207	gene-LOC100794638;gene-LOC100776622;gene-LOC100813162
GO:0000500	RNA polymerase I upstream activating factor complex	Cellular Component	3	7	1	0.399207	gene-LOC100804281;gene-LOC100788173;gene-LOC100775234
GO:0045252	oxoglutarate dehydrogenase complex	Cellular Component	3	7	1	0.399207	gene-LOC100799149;gene-LOC106798008;gene-LOC100816277
GO:0000120	RNA polymerase I transcription factor complex	Cellular Component	3	7	1	0.399207	gene-LOC100804281;gene-LOC100775234;gene-LOC100788173
GO:0042788	polysomal ribosome	Cellular Component	3	7	1	0.399207	gene-LOC100499730;gene-LOC100804776;gene-LOC100500153
GO:0005782	peroxisomal matrix	Cellular Component	3	7	1	0.399207	gene-LOC100802836;gene-LOC100796650;gene-LOC100807487
GO:0097526	spliceosomal tri-snRNP complex	Cellular Component	3	7	1	0.399207	gene-LOC100306498;gene-LOC100807381;gene-LOC100500333
GO:0046540	U4/U6 x U5 tri-snRNP complex	Cellular Component	13	37	1	0.401584	gene-LOC100792526;gene-LOC100786807;gene-LOC100527057;gene-LOC100792141;gene-LOC100807929;gene-LOC547722;gene-LOC100816107;gene-LOC100306304;gene-LOC100527424;gene-LOC100527929;gene-LOC100809048;gene-LOC100817627;gene-LOC100499782
GO:0005643	nuclear pore	Cellular Component	13	37	1	0.401584	gene-LOC100797325;gene-LOC100817671;gene-LOC100776992;gene-LOC100527204;gene-LOC100777660;gene-LOC100819240;gene-LOC100527713;gene-LOC100782831;gene-LOC100786647;gene-LOC100803005;gene-LOC100808599;gene-LOC100500039;gene-LOC100780721
GO:0030141	secretory granule	Cellular Component	4	10	1	0.405015	gene-LOC100814694;gene-LOC100792796;gene-LOC100783306;gene-LOC100782829
GO:0000220	vacuolar proton-transporting V-type ATPase, V0 domain	Cellular Component	4	10	1	0.405015	gene-LOC100786845;gene-LOC100793301;gene-LOC100810062;gene-LOC100800799
GO:0000778	condensed nuclear chromosome kinetochore	Cellular Component	4	10	1	0.405015	gene-LOC547764;gene-LOC100778037;gene-LOC100815227;gene-LOC100799090
GO:0048471	perinuclear region of cytoplasm	Cellular Component	9	25	1	0.406708	gene-LOC100808879;gene-LOC100807416;gene-LOC100194422;gene-LOC100819942;gene-LOC100803851;gene-LOC100809631;gene-LOC100804887;gene-HSP90-1;gene-LOC100815065
GO:0019867	outer membrane	Cellular Component	9	25	1	0.406708	gene-DGD2;gene-LOC100793455;gene-LOC100499736;gene-LOC100777005;gene-LOC100791162;gene-LOC100782080;gene-MAF1;gene-LOC100804911;gene-LOC100306133
GO:0009526	plastid envelope	Cellular Component	29	86	1	0.407064	gene-LOC100784482;gene-LOC100790239;gene-LOC100810796;gene-LOC100793455;gene-LOC100499736;gene-LOC100785945;gene-LOC100799729;gene-GMIQD9;Glycine_max_newGene_1875;gene-LOC100814030;gene-GMIQD17;gene-LOC100796187;gene-LOC100780482;gene-LOC100786069;gene-LOC102660758;gene-LOC100785176;gene-LOC100499940;gene-DGD2;gene-LOC100801384;gene-LOC100811998;gene-LOC100777005;gene-LOC100797443;gene-LOC1008009…
GO:0032300	mismatch repair complex	Cellular Component	5	13	1	0.407434	gene-LOC100792272;gene-LOC100780255;gene-LOC100793891;gene-LOC100794788;gene-LOC100811104
GO:0031977	thylakoid lumen	Cellular Component	5	13	1	0.407434	gene-LOC100817380;gene-LOC100785278;gene-LOC100500352;gene-HRBP1;gene-LOC100305959
GO:0005688	U6 snRNP	Cellular Component	5	13	1	0.407434	gene-LOC100306498;gene-LOC100499782;gene-LOC100527929;gene-LOC100809048;gene-LOC100807381
GO:0005740	mitochondrial envelope	Cellular Component	8	22	1	0.407609	gene-LOC100500382;gene-LOC100527520;gene-LOC100527668;gene-LOC100499828;gene-LOC100798702;gene-LOC100527337;gene-LOC100499736;gene-LOC100500620
GO:0030125	clathrin vesicle coat	Cellular Component	7	19	1	0.408187	gene-LOC100820255;gene-LOC100811093;gene-LOC100818018;gene-LOC100813474;gene-LOC100805865;gene-LOC100787962;gene-LOC100813981
GO:0005663	DNA replication factor C complex	Cellular Component	7	19	1	0.408187	gene-LOC100790070;gene-LOC100802809;gene-LOC100809005;gene-LOC100775926;gene-LOC100791561;gene-LOC100781364;gene-LOC100814391
GO:0031969	chloroplast membrane	Cellular Component	17	50	1	0.434214	gene-LOC102660758;gene-LOC100785176;gene-LOC100796187;gene-LOC100790611;gene-LOC100802404;gene-LOC100794848;gene-LOC100805315;gene-LOC100775892;gene-LOC100799729;gene-LOC100777912;gene-LOC112999559;gene-LOC100801384;gene-LOC100777005;gene-LOC100499736;gene-LOC100811998;gene-DGD2;gene-LOC100793455
GO:0012505	endomembrane system	Cellular Component	129	398	1	0.452455	gene-LOC100807310;gene-LOC100811449;gene-LOC100800714;gene-LOC100778493;gene-LOC100777398;gene-LOC100803288;gene-LOC100811494;gene-LOC100815065;gene-LOC100800991;gene-LOC100780673;gene-HIR3;gene-LOC100810969;gene-LOC100806711;gene-LOC100795961;gene-LOC100804911;gene-LOC100305769;gene-LOC106795763;gene-LOC100800393;gene-LOC100809598;gene-LOC100807498;gene-LOC100780896;gene-LOC100499980;gene-LOC100…
GO:0044429	mitochondrial part	Cellular Component	8	23	1	0.465319	gene-LOC100500382;gene-LOC100798702;gene-LOC100500620;gene-LOC100499736;gene-LOC100527337;gene-LOC100527668;gene-GMGLYII-12;gene-LOC100499828
GO:0005682	U5 snRNP	Cellular Component	8	23	1	0.465319	gene-LOC100786807;gene-LOC100792526;gene-LOC547722;gene-LOC100816107;gene-LOC100306304;gene-LOC100807929;gene-LOC100500333;gene-LOC100792141
GO:0044459	plasma membrane part	Cellular Component	19	57	1	0.46539	gene-LOC100306166;gene-LOC100499681;gene-LOC100818900;gene-LOC100306685;gene-LOC100801468;gene-LOC100810878;gene-LOC100797001;Glycine_max_newGene_5278;gene-LOC100499686;gene-LOC100808966;gene-LOC100787187;gene-LOC100814074;gene-LOC100777292;gene-LOC100785994;gene-LOC100818802;gene-LOC100818162;gene-LOC100807370;gene-LOC100794002;gene-LOC100306063
GO:0000307	cyclin-dependent protein kinase holoenzyme complex	Cellular Component	29	88	1	0.465539	gene-LOC100812660;gene-LOC100791757;gene-LOC100798068;gene-LOC547739;gene-LOC100792173;gene-LOC100780359;gene-LOC100779889;gene-LOC100776578;gene-LOC100801274;gene-LOC100789359;gene-LOC100792867;gene-LOC100790750;gene-LOC100808850;gene-LOC100786837;gene-LOC100807175;gene-LOC100819848;gene-LOC100814207;gene-LOC547740;gene-CYCA1_1;gene-LOC100778578;gene-LOC100812029;gene-CYCB1_1;gene-LOC100807756;g…
GO:0000151	ubiquitin ligase complex	Cellular Component	48	147	1	0.465853	gene-LOC100527072;gene-LOC100791241;gene-LOC100794068;gene-LOC100811988;gene-LOC100780721;gene-LOC100820159;gene-LOC100778680;gene-LOC100796892;gene-LOC100805974;gene-LOC100792669;gene-LOC100814664;gene-LOC100790186;gene-LOC100781966;gene-LOC100775687;gene-LOC100776547;gene-LOC100797330;gene-LOC102669631;gene-LOC100780827;gene-LOC100818162;gene-LOC100787262;gene-LOC100818928;Glycine_max_newGene_4…
GO:0005832	chaperonin-containing T-complex	Cellular Component	7	20	1	0.470227	gene-LOC100793494;gene-LOC100778141;gene-LOC100784862;gene-LOC100817323;gene-LOC100794780;gene-LOC100779791;gene-LOC100786888
GO:0005618	cell wall	Cellular Component	100	309	1	0.470469	gene-LOC100796698;gene-GMCUPIN20.1;gene-LOC100787084;gene-LOC100809470;gene-GF14A;gene-LOC100781528;gene-LOC102664743;gene-LOC100777044;gene-LOC100811787;gene-LOC100803242;gene-GMCUPIN10.4;gene-EXP5A;gene-LOC100813279;gene-LOC100814585;gene-LOC100803595;gene-LOC100778428;gene-LOC100499905;gene-LOC100785688;gene-LOC100780156;gene-LOC100796316;Glycine_max_newGene_4036;gene-LOC100809018;gene-LOC1008…
GO:0055044	symplast	Cellular Component	35	107	1	0.475712	gene-LOC100804750;gene-LOC100499730;gene-LOC100305679;gene-LOC100794002;gene-LOC100800714;gene-LOC100790880;gene-LOC100789295;gene-LOC100813299;gene-LOC100797001;gene-LOC100306189;gene-LOC100819331;gene-GF14A;Glycine_max_newGene_2371;gene-HIR3;gene-LOC100783399;gene-LOC100782030;gene-LOC100794477;gene-LOC100817104;gene-LOC100795465;gene-LOC100810770;gene-LOC100787996;gene-LOC100782090;gene-LOC100…
GO:0030427	site of polarized growth	Cellular Component	6	17	1	0.475739	gene-LOC100816870;gene-LOC100797297;gene-LOC100816663;gene-LOC100807530;gene-LOC100785793;gene-LOC100783495
GO:0005819	spindle	Cellular Component	14	42	1	0.48547	gene-LOC100801192;Glycine_max_newGene_8513;gene-LOC100305850;gene-LOC100788936;gene-LOC100806215;gene-LOC100783702;gene-LOC100776298;gene-LOC100777734;gene-LOC100799043;gene-LOC100789934;gene-LOC100306180;gene-LOC100806071;gene-LOC100810629;gene-LOC100788643
GO:0009501	amyloplast	Cellular Component	4	11	1	0.48968	gene-LOC100807354;gene-LOC100788308;gene-LOC100804775;gene-LOC100301883
GO:0009527	plastid outer membrane	Cellular Component	4	11	1	0.48968	gene-LOC100777005;gene-LOC100499736;gene-LOC100793455;gene-DGD2
GO:0009360	DNA polymerase III complex	Cellular Component	3	8	1	0.499327	gene-LOC100809005;gene-LOC100814391;gene-LOC100791561
GO:0031931	TORC1 complex	Cellular Component	3	8	1	0.499327	gene-LOC100816446;gene-LOC100812024;gene-LOC100816558
GO:0016442	RISC complex	Cellular Component	3	8	1	0.499327	gene-LOC100802766;gene-LOC100816164;gene-LOC100818702
GO:0044613	nuclear pore central transport channel	Cellular Component	3	8	1	0.499327	gene-LOC100783752;gene-LOC100500395;gene-LOC100777334
GO:0070461	SAGA-type complex	Cellular Component	2	5	1	0.513009	gene-LOC100802564;gene-LOC100811524
GO:0005776	autophagosome	Cellular Component	2	5	1	0.513009	gene-LOC100806054;gene-LOC100809347
GO:0043036	starch grain	Cellular Component	2	5	1	0.513009	gene-LOC100814503;gene-LOC100795997
GO:0031262	Ndc80 complex	Cellular Component	2	5	1	0.513009	gene-LOC100815227;gene-LOC100804876
GO:0005884	actin filament	Cellular Component	2	5	1	0.513009	gene-LOC100803056;gene-LOC100793464
GO:0034066	RIC1-RGP1 guanyl-nucleotide exchange factor complex	Cellular Component	2	5	1	0.513009	gene-LOC100802342;gene-LOC100813760
GO:0030906	retromer, cargo-selective complex	Cellular Component	2	5	1	0.513009	gene-LOC100811902;gene-LOC100778365
GO:0035098	ESC/E(Z) complex	Cellular Component	2	5	1	0.513009	gene-LOC100785120;gene-LOC100804138
GO:0000408	EKC/KEOPS complex	Cellular Component	2	5	1	0.513009	gene-LOC100527271;gene-LOC100811814
GO:0030054	cell junction	Cellular Component	38	118	1	0.518096	gene-LOC100782090;gene-LOC100787996;gene-LOC100810770;gene-LOC100807370;gene-LOC100813279;gene-LOC100785742;gene-LOC100814585;gene-LOC100811988;gene-HIR1;gene-LOC100778428;gene-LOC100780156;gene-LOC100802298;gene-LOC100780877;gene-LOC100804982;gene-LOC100306559;gene-LOC100796871;gene-LOC100818900;gene-LOC100804750;gene-LOC100499730;gene-LOC100305679;gene-LOC100818162;gene-LOC100800714;gene-LOC100…
GO:0031011	Ino80 complex	Cellular Component	8	24	1	0.521712	gene-LOC100808396;gene-LOC100788061;gene-LOC100786493;gene-LOC100809596;gene-LOC100796167;gene-LOC100788484;gene-LOC100793005;gene-LOC100799329
GO:0097708	intracellular vesicle	Cellular Component	21	65	1	0.527153	gene-BURP2;gene-LOC100809598;gene-LOC100804956;gene-LOC100782829;gene-LOC100783004;gene-LOC100807251;gene-LOC100794919;gene-LOC100814694;gene-GMRD22;gene-LOC100783342;gene-LOC100170724;gene-LOC100815065;gene-LOC100810746;gene-LOC100796048;gene-LOC100818891;gene-LOC100795465;Glycine_max_newGene_4077;Glycine_max_newGene_3063;gene-LOC100784648;gene-LOC100777051;gene-LOC100799031
GO:0017053	transcriptional repressor complex	Cellular Component	7	21	1	0.530475	gene-LOC100816714;Glycine_max_newGene_7864;gene-LOC100780157;gene-LOC100815645;gene-LOC100819331;gene-LOC100816128;gene-LOC100785502
GO:0009341	beta-galactosidase complex	Cellular Component	1	2	1	0.537942	gene-LOC100777287
GO:0031082	BLOC complex	Cellular Component	1	2	1	0.537942	gene-LOC100782608
GO:0005859	muscle myosin complex	Cellular Component	1	2	1	0.537942	gene-LOC100814445
GO:0072380	TRC complex	Cellular Component	1	2	1	0.537942	gene-LOC100775346
GO:1990468	NuA3b histone acetyltransferase complex	Cellular Component	1	2	1	0.537942	gene-LOC100499798
GO:1903600	glutaminase complex	Cellular Component	1	2	1	0.537942	gene-LOC100786227
GO:0080085	signal recognition particle, chloroplast targeting	Cellular Component	1	2	1	0.537942	Glycine_max_newGene_10293
GO:0033557	Slx1-Slx4 complex	Cellular Component	1	2	1	0.537942	gene-LOC100788794
GO:0031978	plastid thylakoid lumen	Cellular Component	1	2	1	0.537942	gene-LOC100500352
GO:0048476	Holliday junction resolvase complex	Cellular Component	1	2	1	0.537942	gene-LOC100801969
GO:0033116	endoplasmic reticulum-Golgi intermediate compartment membrane	Cellular Component	1	2	1	0.537942	gene-LOC100500114
GO:0005826	actomyosin contractile ring	Cellular Component	1	2	1	0.537942	gene-LOC100805150
GO:0000306	extrinsic component of vacuolar membrane	Cellular Component	1	2	1	0.537942	gene-LOC100813929
GO:0030691	Noc2p-Noc3p complex	Cellular Component	1	2	1	0.537942	gene-LOC100785698
GO:0010168	ER body	Cellular Component	1	2	1	0.537942	gene-LOC100800852
GO:0016460	myosin II complex	Cellular Component	1	2	1	0.537942	gene-LOC100814445
GO:0000418	DNA-directed RNA polymerase IV complex	Cellular Component	1	2	1	0.537942	gene-LOC100500417
GO:0005865	striated muscle thin filament	Cellular Component	1	2	1	0.537942	gene-LOC100814445
GO:0009513	etioplast	Cellular Component	1	2	1	0.537942	gene-LOC100499736
GO:0036379	myofilament	Cellular Component	1	2	1	0.537942	gene-LOC100814445
GO:0070852	cell body fiber	Cellular Component	1	2	1	0.537942	gene-LOC100789980
GO:0032155	cell division site part	Cellular Component	1	2	1	0.537942	gene-LOC100805150
GO:0032783	ELL-EAF complex	Cellular Component	1	2	1	0.537942	gene-LOC100787712
GO:0005951	carbamoyl-phosphate synthase complex	Cellular Component	1	2	1	0.537942	gene-LOC100806168
[truncated: 3,440 more rows]

## Sheet: Purple module
GO_ID	GO_term	ontology	Items	Background_Items	p_adj	pvalue	Gene_ID
GO:0070273	phosphatidylinositol-4-phosphate binding	Molecular Function	2	2	0.000527971	5.49969e-06	gene-LOC102667225;gene-LOC100806040
GO:0004748	ribonucleoside-diphosphate reductase activity, thioredoxin disulfide as acceptor	Molecular Function	2	7	0.0110027	0.000114612	Glycine_max_newGene_2109;gene-LOC100820090
GO:1901981	phosphatidylinositol phosphate binding	Molecular Function	2	15	0.0543437	0.00056608	gene-LOC100806040;gene-LOC102667225
GO:0030976	thiamine pyrophosphate binding	Molecular Function	2	25	0.152912	0.00159283	gene-LOC100816073;gene-LOC100798570
GO:0030983	mismatched DNA binding	Molecular Function	2	28	0.191788	0.00199779	gene-LOC102669673;Glycine_max_newGene_10200
GO:0070205	2-succinyl-6-hydroxy-2,4-cyclohexadiene-1-carboxylate synthase activity	Molecular Function	1	1	0.226626	0.00236069	gene-LOC100798570
GO:0001025	RNA polymerase III transcription factor binding	Molecular Function	1	1	0.226626	0.00236069	gene-LOC100814948
GO:0033201	alpha-1,4-glucan synthase activity	Molecular Function	1	2	0.452724	0.00471588	Glycine_max_newGene_8868
GO:0009011	starch synthase activity	Molecular Function	1	2	0.452724	0.00471588	Glycine_max_newGene_8868
GO:0033699	DNA 5'-adenosine monophosphate hydrolase activity	Molecular Function	1	2	0.452724	0.00471588	Glycine_max_newGene_10200
GO:1990165	single-strand break-containing DNA binding	Molecular Function	1	2	0.452724	0.00471588	Glycine_max_newGene_10200
GO:0004160	dihydroxy-acid dehydratase activity	Molecular Function	1	2	0.452724	0.00471588	Glycine_max_newGene_579
GO:0004337	geranyltranstransferase activity	Molecular Function	1	3	0.678296	0.00706558	gene-LOC100782137
GO:0035091	phosphatidylinositol binding	Molecular Function	2	56	0.748731	0.00779928	gene-LOC100806040;gene-LOC102667225
GO:0004161	dimethylallyltranstransferase activity	Molecular Function	1	4	0.903341	0.00940981	gene-LOC100782137
GO:0001156	TFIIIC-class transcription factor binding	Molecular Function	1	4	0.903341	0.00940981	gene-LOC100814948
GO:0004591	oxoglutarate dehydrogenase (succinyl-transferring) activity	Molecular Function	1	4	0.903341	0.00940981	gene-LOC100816073
GO:0070204	2-succinyl-5-enolpyruvyl-6-hydroxy-3-cyclohexene-1-carboxylic-acid synthase activity	Molecular Function	1	4	0.903341	0.00940981	gene-LOC100798570
GO:0005543	phospholipid binding	Molecular Function	2	69	1	0.0116491	gene-LOC102667225;gene-LOC100806040
GO:0070182	DNA polymerase binding	Molecular Function	1	5	1	0.0117486	gene-LOC102667562
GO:0033819	lipoyl(octanoyl) transferase activity	Molecular Function	1	5	1	0.0117486	Glycine_max_newGene_2512
GO:0004347	glucose-6-phosphate isomerase activity	Molecular Function	1	7	1	0.0164098	gene-LOC100814915
GO:0008168	methyltransferase activity	Molecular Function	3	253	1	0.0221411	gene-LOC100786553;gene-LOC100811015;Glycine_max_newGene_4216
GO:0052656	L-isoleucine transaminase activity	Molecular Function	1	10	1	0.0233609	gene-LOC100798328
GO:0052654	L-leucine transaminase activity	Molecular Function	1	10	1	0.0233609	gene-LOC100798328
GO:0052655	L-valine transaminase activity	Molecular Function	1	10	1	0.0233609	gene-LOC100798328
GO:0004478	methionine adenosyltransferase activity	Molecular Function	1	11	1	0.0256672	gene-LOC100777009
GO:0051015	actin filament binding	Molecular Function	2	109	1	0.027513	gene-LOC100815707;gene-LOC100807762
GO:0048029	monosaccharide binding	Molecular Function	1	12	1	0.027968	gene-LOC100814915
GO:0042910	xenobiotic transporter activity	Molecular Function	2	110	1	0.0279804	gene-LOC100805918;gene-LOC100799518
GO:0003724	RNA helicase activity	Molecular Function	2	112	1	0.0289247	Glycine_max_newGene_6683;Glycine_max_newGene_11450
GO:0043168	anion binding	Molecular Function	2	115	1	0.0303648	gene-LOC100806040;gene-LOC102667225
GO:0003697	single-stranded DNA binding	Molecular Function	2	126	1	0.0358816	Glycine_max_newGene_10200;gene-LOC102662089
GO:0070628	proteasome binding	Molecular Function	1	17	1	0.0393923	Glycine_max_newGene_1489
GO:0016757	transferase activity, transferring glycosyl groups	Molecular Function	3	324	1	0.0414543	gene-LOC100787815;gene-LOC100792032;gene-LOC100795606
GO:0008061	chitin binding	Molecular Function	1	18	1	0.0416612	gene-WIN
GO:0016274	protein-arginine N-methyltransferase activity	Molecular Function	1	19	1	0.0439248	gene-LOC100778113
GO:0047372	acylglycerol lipase activity	Molecular Function	1	19	1	0.0439248	gene-LOC100782441
GO:0004032	alditol:NADP+ 1-oxidoreductase activity	Molecular Function	1	19	1	0.0439248	gene-LOC100787305
GO:0043167	ion binding	Molecular Function	2	144	1	0.0456643	gene-LOC102667225;gene-LOC100806040
GO:0003725	double-stranded RNA binding	Molecular Function	1	22	1	0.050684	Glycine_max_newGene_10200
GO:0008106	alcohol dehydrogenase (NADP+) activity	Molecular Function	1	25	1	0.057396	gene-LOC100787305
GO:0015297	antiporter activity	Molecular Function	2	169	1	0.0606555	gene-LOC100805918;gene-LOC100799518
GO:0061135	endopeptidase regulator activity	Molecular Function	1	32	1	0.0728759	gene-LOC100807255
GO:2001070	starch binding	Molecular Function	1	32	1	0.0728759	gene-LOC106798047
GO:0061133	endopeptidase activator activity	Molecular Function	1	33	1	0.0750667	gene-LOC100807255
GO:0016504	peptidase activator activity	Molecular Function	1	34	1	0.0772524	gene-LOC100807255
GO:0061134	peptidase regulator activity	Molecular Function	1	34	1	0.0772524	gene-LOC100807255
GO:0003723	RNA binding	Molecular Function	7	1582	1	0.0794977	gene-LOC100784506;gene-LOC100776329;gene-LOC112998761;gene-LOC100780302;Glycine_max_newGene_6683;Glycine_max_newGene_11450;gene-LOC100775408
GO:0005515	protein binding	Molecular Function	6	1307	1	0.0882815	gene-LOC100789469;gene-LOC100793316;gene-LOC100807255;gene-LOC100814948;gene-LOC100775310;gene-LOC100817215
GO:0004842	ubiquitin-protein transferase activity	Molecular Function	3	454	1	0.0924387	gene-LOC100780302;gene-LOC100775721;Glycine_max_newGene_1019
GO:0031593	polyubiquitin modification-dependent protein binding	Molecular Function	1	43	1	0.0966959	Glycine_max_newGene_1489
GO:0042578	phosphoric ester hydrolase activity	Molecular Function	1	44	1	0.0988312	gene-LOC102660101
GO:0005488	binding	Molecular Function	5	1049	1	0.102096	gene-LOC100807255;gene-LOC100817215;gene-LOC102667225;gene-LOC100806040;gene-LOC100814948
GO:0070011	peptidase activity, acting on L-amino acid peptides	Molecular Function	1	47	1	0.105207	gene-LOC100807255
GO:0008289	lipid binding	Molecular Function	2	238	1	0.108811	gene-LOC100806040;gene-LOC102667225
GO:0031072	heat shock protein binding	Molecular Function	1	58	1	0.128207	gene-LOC100799962
GO:0042803	protein homodimerization activity	Molecular Function	1	59	1	0.130269	gene-LOC100817215
GO:0043130	ubiquitin binding	Molecular Function	1	60	1	0.132326	Glycine_max_newGene_1489
GO:0003993	acid phosphatase activity	Molecular Function	1	61	1	0.134378	Glycine_max_newGene_11471
GO:0042802	identical protein binding	Molecular Function	1	66	1	0.144567	gene-LOC100817215
GO:0004175	endopeptidase activity	Molecular Function	1	73	1	0.158633	gene-LOC100807255
GO:0004364	glutathione transferase activity	Molecular Function	1	74	1	0.160624	gene-LOC548030
GO:0008047	enzyme activator activity	Molecular Function	1	74	1	0.160624	gene-LOC100807255
GO:0016616	oxidoreductase activity, acting on the CH-OH group of donors, NAD or NADP as acceptor	Molecular Function	1	77	1	0.166568	gene-LOC100787267
GO:0016491	oxidoreductase activity	Molecular Function	3	693	1	0.224804	gene-LOC100787267;gene-LOC100787305;gene-LOC100803985
GO:0008233	peptidase activity	Molecular Function	1	110	1	0.229276	gene-LOC100807255
GO:0098772	molecular function regulator	Molecular Function	1	117	1	0.241966	gene-LOC100807255
GO:0003712	transcription cofactor activity	Molecular Function	1	137	1	0.277099	gene-LOC100817215
GO:0030234	enzyme regulator activity	Molecular Function	1	141	1	0.283931	gene-LOC100807255
GO:0008134	transcription factor binding	Molecular Function	1	154	1	0.305695	gene-LOC100814948
GO:0003674	molecular_function	Molecular Function	5	1591	1	0.322259	gene-LOC100817215;gene-LOC102667225;gene-LOC100806040;gene-LOC100814948;gene-LOC100807255
GO:0004185	serine-type carboxypeptidase activity	Molecular Function	1	168	1	0.328405	Glycine_max_newGene_4179
GO:0016887	ATPase activity	Molecular Function	2	505	1	0.335154	Glycine_max_newGene_3539;gene-LOC112998761
GO:0003700	transcription factor activity, sequence-specific DNA binding	Molecular Function	5	1684	1	0.366161	gene-LOC100782841;gene-GMBZIP38;gene-WRKY6;gene-LOC100776824;gene-LOC100801080
GO:0022857	transmembrane transporter activity	Molecular Function	2	542	1	0.366847	gene-LOC100810660;gene-LOC100799518
GO:0042626	ATPase activity, coupled to transmembrane movement of substances	Molecular Function	1	211	1	0.393669	gene-LOC112998761
GO:0051082	unfolded protein binding	Molecular Function	1	227	1	0.416321	gene-LOC100799962
GO:0004553	hydrolase activity, hydrolyzing O-glycosyl compounds	Molecular Function	1	256	1	0.455269	Glycine_max_newGene_1691
GO:0043565	sequence-specific DNA binding	Molecular Function	3	1114	1	0.49197	gene-WRKY6;gene-LOC100782841;gene-LOC100776824
GO:0008270	zinc ion binding	Molecular Function	4	1662	1	0.556528	gene-LOC100776329;gene-LOC100785728;Glycine_max_newGene_6885;gene-LOC100797008
GO:0043531	ADP binding	Molecular Function	1	423	1	0.634456	Glycine_max_newGene_1445
GO:0016740	transferase activity	Molecular Function	1	431	1	0.641394	gene-LOC102660101
GO:0000976	transcription regulatory region sequence-specific DNA binding	Molecular Function	1	450	1	0.657355	gene-LOC100776824
GO:0005525	GTP binding	Molecular Function	1	455	1	0.661438	gene-LOC100799694
GO:0005509	calcium ion binding	Molecular Function	1	468	1	0.671828	gene-LOC100527447
GO:0004674	protein serine/threonine kinase activity	Molecular Function	2	997	1	0.68643	gene-LOC100775335;gene-LOC100792736
GO:0016787	hydrolase activity	Molecular Function	2	998	1	0.686964	gene-LOC100807255;gene-LOC100795999
GO:0046872	metal ion binding	Molecular Function	4	2023	1	0.711196	gene-LOC100777009;gene-LOC100799962;Glycine_max_newGene_11471;gene-LOC100797346
GO:0003676	nucleic acid binding	Molecular Function	4	2044	1	0.718889	Glycine_max_newGene_888;gene-LOC100814948;Glycine_max_newGene_10188;Glycine_max_newGene_6885
GO:1901363	heterocyclic compound binding	Molecular Function	1	588	1	0.754035	gene-LOC100814948
GO:0097159	organic cyclic compound binding	Molecular Function	1	591	1	0.755805	gene-LOC100814948
GO:0046983	protein dimerization activity	Molecular Function	1	900	1	0.884378	gene-LOC100817215
GO:0003824	catalytic activity	Molecular Function	1	1115	1	0.931575	gene-LOC100807255
GO:0003677	DNA binding	Molecular Function	2	2256	1	0.973215	gene-LOC100781424;gene-LOC100814948
GO:0005524	ATP binding	Molecular Function	4	4445	1	0.995355	gene-LOC102662089;gene-LOC100777009;Glycine_max_newGene_11450;Glycine_max_newGene_2109
GO:0005789	endoplasmic reticulum membrane	Cellular Component	6	297	0.00431689	5.91355e-05	gene-LOC100807255;gene-LOC100806040;gene-LOC100527876;gene-LOC100784506;gene-GMBZIP38;gene-LOC102667225
GO:0098827	endoplasmic reticulum subcompartment	Cellular Component	3	50	0.0153953	0.000210895	gene-LOC102667225;gene-LOC100807255;gene-LOC100806040
GO:0042175	nuclear outer membrane-endoplasmic reticulum membrane network	Cellular Component	3	54	0.0193577	0.000265174	gene-LOC102667225;gene-LOC100807255;gene-LOC100806040
GO:0044432	endoplasmic reticulum part	Cellular Component	3	55	0.0204415	0.000280021	gene-LOC102667225;gene-LOC100807255;gene-LOC100806040
GO:0044440	endosomal part	Cellular Component	2	21	0.0783166	0.00107283	gene-LOC102667225;gene-LOC100806040
GO:0044433	cytoplasmic vesicle part	Cellular Component	2	26	0.120317	0.00164818	gene-LOC102667225;gene-LOC100806040
GO:0090576	RNA polymerase III transcription factor complex	Cellular Component	1	1	0.169345	0.0023198	gene-LOC100814948
GO:0010008	endosome membrane	Cellular Component	2	32	0.182011	0.00249331	gene-LOC100806040;gene-LOC102667225
GO:0031984	organelle subcompartment	Cellular Component	3	122	0.206546	0.0028294	gene-LOC100806040;gene-LOC102667225;gene-LOC100807255
GO:0033116	endoplasmic reticulum-Golgi intermediate compartment membrane	Cellular Component	1	2	0.338307	0.00463435	gene-LOC100527876
GO:0044425	membrane part	Cellular Component	3	168	0.504463	0.00691045	gene-LOC100807255;gene-LOC100806040;gene-LOC102667225
GO:0005971	ribonucleoside-diphosphate reductase complex	Cellular Component	1	4	0.675084	0.00924773	Glycine_max_newGene_2109
GO:0097708	intracellular vesicle	Cellular Component	2	65	0.727268	0.00996257	gene-LOC102667225;gene-LOC100806040
GO:0045252	oxoglutarate dehydrogenase complex	Cellular Component	1	7	1	0.0161287	gene-LOC100816073
GO:0098805	whole membrane	Cellular Component	2	87	1	0.0173525	gene-LOC100806040;gene-LOC102667225
GO:0071944	cell periphery	Cellular Component	4	431	1	0.0173783	gene-LOC102667225;gene-LOC100793316;gene-LOC100789469;gene-LOC100806040
GO:0098588	bounding membrane of organelle	Cellular Component	2	88	1	0.0177302	gene-LOC102667225;gene-LOC100806040
GO:0000126	transcription factor TFIIIB complex	Cellular Component	1	8	1	0.018412	gene-LOC100814948
GO:0031410	cytoplasmic vesicle	Cellular Component	2	92	1	0.0192759	gene-LOC100806040;gene-LOC102667225
GO:0031982	vesicle	Cellular Component	2	106	1	0.0251099	gene-LOC102667225;gene-LOC100806040
GO:0044798	nuclear transcription factor complex	Cellular Component	1	11	1	0.0252308	gene-LOC100814948
GO:0034399	nuclear periphery	Cellular Component	1	12	1	0.0274934	gene-LOC100805013
GO:0000799	nuclear condensin complex	Cellular Component	1	13	1	0.0297509	gene-LOC102662089
GO:0031090	organelle membrane	Cellular Component	2	124	1	0.0335231	gene-LOC102667225;gene-LOC100806040
GO:0012507	ER to Golgi transport vesicle membrane	Cellular Component	1	17	1	0.03873	gene-LOC100527876
GO:0030014	CCR4-NOT complex	Cellular Component	1	17	1	0.03873	gene-LOC100780302
GO:0044446	intracellular organelle part	Cellular Component	4	619	1	0.0544445	gene-LOC100806040;gene-LOC100814948;gene-LOC100807255;gene-LOC102667225
GO:0044422	organelle part	Cellular Component	4	629	1	0.0571121	gene-LOC100807255;gene-LOC102667225;gene-LOC100806040;gene-LOC100814948
GO:0005768	endosome	Cellular Component	2	175	1	0.0621829	gene-LOC100806040;gene-LOC102667225
GO:0012505	endomembrane system	Cellular Component	3	398	1	0.0644894	gene-LOC100807255;gene-LOC100806040;gene-LOC102667225
GO:1905368	peptidase complex	Cellular Component	1	34	1	0.0759943	gene-LOC100807255
GO:1905369	endopeptidase complex	Cellular Component	1	34	1	0.0759943	gene-LOC100807255
GO:0034515	proteasome storage granule	Cellular Component	1	35	1	0.0781418	gene-LOC100807255
GO:0019774	proteasome core complex, beta-subunit complex	Cellular Component	1	35	1	0.0781418	gene-LOC100807255
GO:0030687	preribosome, large subunit precursor	Cellular Component	1	37	1	0.0824223	gene-LOC100805013
GO:0005654	nucleoplasm	Cellular Component	2	213	1	0.0873327	Glycine_max_newGene_1489;gene-LOC100807255
GO:0005773	vacuole	Cellular Component	2	213	1	0.0873327	Glycine_max_newGene_4179;gene-LOC100527876
GO:0031597	cytosolic proteasome complex	Cellular Component	1	40	1	0.0888066	gene-LOC100807255
GO:0005667	transcription factor complex	Cellular Component	1	43	1	0.0951476	gene-LOC100814948
GO:0005783	endoplasmic reticulum	Cellular Component	3	481	1	0.100117	gene-LOC100806040;gene-LOC100807255;gene-LOC102667225
GO:0044445	cytosolic part	Cellular Component	1	49	1	0.107701	gene-LOC100807255
GO:0044428	nuclear part	Cellular Component	2	249	1	0.113467	gene-LOC100814948;gene-LOC100807255
GO:0005730	nucleolus	Cellular Component	2	262	1	0.123357	gene-LOC100805013;gene-LOC100793322
GO:0000502	proteasome complex	Cellular Component	1	63	1	0.136334	gene-LOC100807255
GO:0015629	actin cytoskeleton	Cellular Component	1	64	1	0.138344	gene-LOC100807762
GO:0005839	proteasome core complex	Cellular Component	1	71	1	0.15229	gene-LOC100807255
GO:0005739	mitochondrion	Cellular Component	3	643	1	0.186539	gene-LOC100816073;gene-LOC100820049;Glycine_max_newGene_2512
GO:0016020	membrane	Cellular Component	6	1681	1	0.190695	gene-LOC100806040;gene-LOC100799518;gene-LOC102667225;gene-LOC100793316;gene-LOC100789469;gene-LOC100807255
GO:0032991	macromolecular complex	Cellular Component	2	367	1	0.209136	gene-LOC100807255;gene-LOC100814948
GO:0044444	cytoplasmic part	Cellular Component	4	1018	1	0.209164	gene-LOC100807255;gene-LOC102667225;gene-LOC100789469;gene-LOC100806040
GO:0005829	cytosol	Cellular Component	5	1389	1	0.217394	gene-LOC100789469;gene-LOC100807255;Glycine_max_newGene_1489;gene-LOC100787305;gene-LOC100814915
GO:0005623	cell	Cellular Component	7	2148	1	0.225277	gene-LOC100775310;gene-LOC102667225;gene-LOC100806040;gene-LOC100807255;gene-LOC100793316;gene-LOC100789469;gene-LOC100817215
GO:0044424	intracellular part	Cellular Component	6	1965	1	0.302269	gene-LOC100807255;gene-LOC100789469;gene-LOC100775310;gene-LOC102667225;gene-LOC100817215;gene-LOC100814948
GO:0005622	intracellular	Cellular Component	6	1969	1	0.303946	gene-LOC100807255;gene-LOC100789469;gene-LOC100817215;gene-LOC102667225;gene-LOC100775310;gene-LOC100806040
GO:0043227	membrane-bounded organelle	Cellular Component	5	1665	1	0.342779	gene-LOC100807255;gene-LOC102667225;gene-LOC100817215;gene-LOC100814948;gene-LOC100806040
GO:0005774	vacuolar membrane	Cellular Component	1	180	1	0.34304	gene-LOC100815707
GO:0043229	intracellular organelle	Cellular Component	5	1725	1	0.371318	gene-LOC100807255;gene-LOC100817215;gene-LOC102667225;gene-LOC100806040;gene-LOC100814948
GO:0043226	organelle	Cellular Component	5	1735	1	0.376088	gene-LOC100807255;gene-LOC102667225;gene-LOC100817215;gene-LOC100814948;gene-LOC100806040
GO:0000139	Golgi membrane	Cellular Component	1	204	1	0.379028	gene-LOC100792032
GO:0044464	cell part	Cellular Component	6	2148	1	0.380586	gene-LOC100789469;gene-LOC100793316;gene-LOC100807255;gene-LOC100814948;gene-LOC100817215;gene-LOC100806040
GO:1902494	catalytic complex	Cellular Component	1	208	1	0.384835	gene-LOC100807255
GO:0031981	nuclear lumen	Cellular Component	1	212	1	0.39059	gene-LOC100807255
GO:0043233	organelle lumen	Cellular Component	1	223	1	0.406146	gene-LOC100807255
GO:0070013	intracellular organelle lumen	Cellular Component	1	223	1	0.406146	gene-LOC100807255
GO:0031974	membrane-enclosed lumen	Cellular Component	1	223	1	0.406146	gene-LOC100807255
GO:0042025	host cell nucleus	Cellular Component	1	347	1	0.556792	gene-LOC100782841
GO:0005575	cellular_component	Cellular Component	5	2194	1	0.587509	gene-LOC100775310;gene-LOC102667225;gene-LOC100806040;gene-LOC100817215;gene-LOC100814948
GO:0005737	cytoplasm	Cellular Component	7	3563	1	0.746609	Glycine_max_newGene_11450;gene-LOC100799962;gene-LOC100795999;gene-LOC100807762;gene-LOC100782137;gene-LOC100789469;gene-LOC100807255
GO:0005576	extracellular region	Cellular Component	1	606	1	0.761053	gene-LOC100780217
GO:0043231	intracellular membrane-bounded organelle	Cellular Component	4	2215	1	0.772552	gene-LOC100807255;gene-LOC100820049;gene-LOC100814948;gene-LOC100817215
GO:0005886	plasma membrane	Cellular Component	4	2389	1	0.82298	gene-LOC102667225;gene-LOC112998761;gene-LOC100806040;gene-LOC100815707
GO:0005634	nucleus	Cellular Component	3	6076	1	0.999992	gene-LOC100806243;Glycine_max_newGene_6683;gene-LOC100792736
GO:0016021	integral component of membrane	Cellular Component	6	10343	1	1	gene-LOC100811015;gene-LOC100816329;Glycine_max_newGene_4216;gene-LOC100815374;Glycine_max_newGene_144;gene-LOC112998761
GO:1900056	negative regulation of leaf senescence	Biological Process	2	2	0.00126959	4.47039e-06	gene-LOC100806040;gene-LOC102667225
GO:1905622	negative regulation of leaf development	Biological Process	2	2	0.00126959	4.47039e-06	gene-LOC102667225;gene-LOC100806040
GO:1900055	regulation of leaf senescence	Biological Process	2	8	0.0352582	0.000124149	gene-LOC100806040;gene-LOC102667225
GO:1900150	regulation of defense response to fungus	Biological Process	2	13	0.097551	0.00034349	gene-LOC102667225;gene-LOC100806040
GO:2000024	regulation of leaf development	Biological Process	2	19	0.212118	0.000746895	gene-LOC102667225;gene-LOC100806040
GO:0009751	response to salicylic acid	Biological Process	2	20	0.235366	0.000828752	gene-LOC102667225;gene-LOC100806040
GO:0002831	regulation of response to biotic stimulus	Biological Process	2	21	0.259786	0.000914741	gene-LOC102667225;gene-LOC100806040
GO:0032101	regulation of response to external stimulus	Biological Process	2	23	0.312129	0.00109904	gene-LOC100806040;gene-LOC102667225
GO:0043900	regulation of multi-organism process	Biological Process	2	28	0.463176	0.0016309	gene-LOC100806040;gene-LOC102667225
GO:0051241	negative regulation of multicellular organismal process	Biological Process	2	33	0.642586	0.00226263	gene-LOC100806040;gene-LOC102667225
GO:0009723	response to ethylene	Biological Process	2	40	0.940276	0.00331083	gene-LOC100806040;gene-LOC102667225
GO:0051093	negative regulation of developmental process	Biological Process	2	41	0.987152	0.00347589	gene-LOC102667225;gene-LOC100806040
GO:0046677	response to antibiotic	Biological Process	2	45	1	0.00417374	gene-LOC102667225;gene-LOC100806040
GO:0045337	farnesyl diphosphate biosynthetic process	Biological Process	1	2	1	0.00426792	gene-LOC100782137
GO:0014070	response to organic cyclic compound	Biological Process	2	51	1	0.00533165	gene-LOC102667225;gene-LOC100806040
GO:0048831	regulation of shoot system development	Biological Process	2	54	1	0.00595967	gene-LOC102667225;gene-LOC100806040
GO:0009641	shade avoidance	Biological Process	1	3	1	0.00639518	gene-LOC100817215
GO:0006990	positive regulation of transcription from RNA polymerase II promoter involved in unfolded protein response	Biological Process	1	3	1	0.00639518	gene-GMBZIP38
GO:0009063	cellular amino acid catabolic process	Biological Process	1	3	1	0.00639518	gene-LOC100798570
GO:0000012	single strand break repair	Biological Process	1	4	1	0.00851799	Glycine_max_newGene_10200
GO:0042493	response to drug	Biological Process	2	70	1	0.00984192	gene-LOC100806040;gene-LOC102667225
GO:0006260	DNA replication	Biological Process	2	71	1	0.0101135	gene-LOC102667562;Glycine_max_newGene_2109
GO:0065004	protein-DNA complex assembly	Biological Process	1	5	1	0.0106364	gene-LOC100814948
GO:0071163	DNA replication preinitiation complex assembly	Biological Process	1	5	1	0.0106364	gene-LOC102667562
GO:0080134	regulation of response to stress	Biological Process	2	77	1	0.011812	gene-LOC102667225;gene-LOC100806040
GO:0031347	regulation of defense response	Biological Process	2	79	1	0.0124041	gene-LOC102667225;gene-LOC100806040
GO:0046834	lipid phosphorylation	Biological Process	1	6	1	0.0127503	gene-LOC100789469
GO:0008154	actin polymerization or depolymerization	Biological Process	1	6	1	0.0127503	gene-LOC100807762
GO:0009234	menaquinone biosynthetic process	Biological Process	1	6	1	0.0127503	gene-LOC100798570
GO:0070072	vacuolar proton-transporting V-type ATPase complex assembly	Biological Process	1	7	1	0.0148598	gene-LOC100527876
GO:0051014	actin filament severing	Biological Process	1	7	1	0.0148598	gene-LOC100807762
GO:0046488	phosphatidylinositol metabolic process	Biological Process	1	7	1	0.0148598	gene-LOC100789469
GO:0009314	response to radiation	Biological Process	2	91	1	0.0162213	gene-LOC100817215;gene-LOC100793316
GO:0070898	RNA polymerase III transcriptional preinitiation complex assembly	Biological Process	1	8	1	0.0169649	gene-LOC100814948
GO:0009263	deoxyribonucleotide biosynthetic process	Biological Process	1	8	1	0.0169649	Glycine_max_newGene_2109
GO:0030174	regulation of DNA-dependent DNA replication initiation	Biological Process	1	8	1	0.0169649	gene-LOC102667562
GO:0006384	transcription initiation from RNA polymerase III promoter	Biological Process	1	9	1	0.0190656	gene-LOC100814948
GO:0070897	DNA-templated transcriptional preinitiation complex assembly	Biological Process	1	9	1	0.0190656	gene-LOC100814948
GO:0009249	protein lipoylation	Biological Process	1	9	1	0.0190656	Glycine_max_newGene_2512
GO:0006556	S-adenosylmethionine biosynthetic process	Biological Process	1	10	1	0.0211619	gene-LOC100777009
GO:0071824	protein-DNA complex subunit organization	Biological Process	1	10	1	0.0211619	gene-LOC100814948
GO:0030258	lipid modification	Biological Process	1	11	1	0.0232538	gene-LOC100789469
GO:0006650	glycerophospholipid metabolic process	Biological Process	1	11	1	0.0232538	gene-LOC100789469
GO:2000026	regulation of multicellular organismal development	Biological Process	2	114	1	0.0247357	gene-LOC100806040;gene-LOC102667225
GO:0046486	glycerolipid metabolic process	Biological Process	1	12	1	0.0253413	gene-LOC100789469
GO:0045839	negative regulation of mitotic nuclear division	Biological Process	1	14	1	0.0295032	gene-LOC100806243
GO:0048519	negative regulation of biological process	Biological Process	3	315	1	0.0297046	gene-LOC102667225;gene-LOC100806040;gene-LOC100817215
GO:0051239	regulation of multicellular organismal process	Biological Process	2	129	1	0.0310732	gene-LOC102667225;gene-LOC100806040
GO:0097659	nucleic acid-templated transcription	Biological Process	1	15	1	0.0315777	gene-LOC100814948
GO:0032774	RNA biosynthetic process	Biological Process	1	16	1	0.0336477	gene-LOC100814948
GO:0048511	rhythmic process	Biological Process	1	16	1	0.0336477	gene-LOC100817215
GO:0010274	hydrotropism	Biological Process	1	16	1	0.0336477	gene-LOC100797914
[truncated: 232 more rows]

## Sheet: Yellow module
GO_ID	GO_term	ontology	Items	Background_Items	p_adj	pvalue	Gene_ID
[truncated: 352 more rows]
