# Supplementary material for: Transcriptomic Analysis Reveals the Regulatory Networks and Hub Genes Controlling the Unsaturated Fatty Acid Contents of Developing Seed in Soybean
Source: Front Plant Sci. 2022 May 12;13:876371. doi: 10.3389/fpls.2022.876371 (PMC9134122; doi:10.3389/fpls.2022.876371)
Supplement: Supplementary Table 5 — Kyoto Encyclopedia of Genes and Genomes (KEGG) enrichment analysis of three modules. [file Table_7.XLSX]

## Sheet: Skyblue module
#Kegg_pathway	ko_id	Cluter_frequency	Genome_frequency	P-value	Corrected_P-value
Biosynthesis of amino acids	ko01230	255 out of 5157 4.94473531122746%	583 out of 17889 3.25898596903125%	0	0
Ribosome	ko03010	283 out of 5157 5.4876866395191%	686 out of 17889 3.83475879031807%	0	0
Carbon metabolism	ko01200	307 out of 5157 5.95307349234051%	657 out of 17889 3.67264799597518%	0	0
Oxidative phosphorylation	ko00190	156 out of 5157 3.02501454333915%	261 out of 17889 1.45899714908603%	1.15033e-25	1.55295e-23
Phagosome	ko04145	121 out of 5157 2.3463253829746%	201 out of 17889 1.12359550561798%	1.42885e-20	1.92895e-18
Photosynthesis - antenna proteins	ko00196	33 out of 5157 0.639906922629436%	35 out of 17889 0.195650958689698%	4.29578e-16	5.7993e-14
Photosynthesis	ko00195	67 out of 5157 1.29920496412643%	108 out of 17889 0.603722958242495%	6.79079e-13	9.16757e-11
Citrate cycle (TCA cycle)	ko00020	73 out of 5157 1.41555167733178%	130 out of 17889 0.726703560847448%	6.10448e-11	8.24105e-09
Glycolysis / Gluconeogenesis	ko00010	161 out of 5157 3.12197013767694%	373 out of 17889 2.08508021689306%	1.79134e-09	2.41831e-07
Pyruvate metabolism	ko00620	113 out of 5157 2.19119643203413%	246 out of 17889 1.37514673821902%	7.74794e-09	1.04597e-06
Endocytosis	ko04144	229 out of 5157 4.44056622067093%	581 out of 17889 3.24780591424898%	1.65213e-08	2.23037e-06
Glycine, serine and threonine metabolism	ko00260	82 out of 5157 1.59007174713981%	176 out of 17889 0.983844820839622%	4.03964e-07	5.45351e-05
Butanoate metabolism	ko00650	38 out of 5157 0.736862516967229%	66 out of 17889 0.368941807814858%	9.88409e-07	0.000133435
Fructose and mannose metabolism	ko00051	85 out of 5157 1.64824510374249%	195 out of 17889 1.09005534127117%	7.22386e-06	0.000975221
SNARE interactions in vesicular transport	ko04130	47 out of 5157 0.911382586775257%	93 out of 17889 0.519872547375482%	8.13076e-06	0.00109765
Steroid biosynthesis	ko00100	40 out of 5157 0.775644754702346%	76 out of 17889 0.4248420817262%	1.08257e-05	0.00146147
Pentose phosphate pathway	ko00030	70 out of 5157 1.35737832072911%	156 out of 17889 0.872044273016938%	1.38794e-05	0.00187372
Carbon fixation in photosynthetic organisms	ko00710	76 out of 5157 1.47372503393446%	175 out of 17889 0.978254793448488%	2.50951e-05	0.00338784
Phenylalanine, tyrosine and tryptophan biosynthesis	ko00400	56 out of 5157 1.08590265658328%	124 out of 17889 0.693163396500643%	7.75638e-05	0.0104711
N-Glycan biosynthesis	ko00510	66 out of 5157 1.27981384525887%	154 out of 17889 0.860864218234669%	0.000133523	0.0180256
Propanoate metabolism	ko00640	42 out of 5157 0.814426992437464%	90 out of 17889 0.503102465202079%	0.000244534	0.0330121
Various types of N-glycan biosynthesis	ko00513	57 out of 5157 1.10529377545084%	134 out of 17889 0.749063670411985%	0.000464391	0.0626928
Pyrimidine metabolism	ko00240	74 out of 5157 1.43494279619934%	183 out of 17889 1.02297501257756%	0.000471509	0.0636537
Synthesis and degradation of ketone bodies	ko00072	13 out of 5157 0.252084545278263%	20 out of 17889 0.111800547822684%	0.000838761	0.113233
Glycosylphosphatidylinositol (GPI)-anchor biosynthesis	ko00563	38 out of 5157 0.736862516967229%	84 out of 17889 0.469562300855274%	0.000993432	0.134113
Fatty acid metabolism	ko01212	64 out of 5157 1.24103160752375%	159 out of 17889 0.88881435519034%	0.00125641	0.169615
Inositol phosphate metabolism	ko00562	96 out of 5157 1.86154741128563%	255 out of 17889 1.42545698473923%	0.00137381	0.185464
One carbon pool by folate	ko00670	25 out of 5157 0.484777971688966%	51 out of 17889 0.285091396947845%	0.00180573	0.243774
Glyoxylate and dicarboxylate metabolism	ko00630	83 out of 5157 1.60946286600737%	218 out of 17889 1.21862597126726%	0.0019258	0.259983
Lysine biosynthesis	ko00300	15 out of 5157 0.29086678301338%	26 out of 17889 0.14534071216949%	0.00195532	0.263968
Other glycan degradation	ko00511	72 out of 5157 1.39616055846422%	188 out of 17889 1.05092514953323%	0.0030977	0.41819
Phosphatidylinositol signaling system	ko04070	84 out of 5157 1.62885398487493%	226 out of 17889 1.26334619039633%	0.00394163	0.532119
Valine, leucine and isoleucine degradation	ko00280	67 out of 5157 1.29920496412643%	175 out of 17889 0.978254793448488%	0.00424793	0.573471
Fatty acid biosynthesis	ko00061	44 out of 5157 0.853209230172581%	108 out of 17889 0.603722958242495%	0.005163	0.697004
Riboflavin metabolism	ko00740	31 out of 5157 0.601124684894318%	72 out of 17889 0.402481972161664%	0.00686451	0.926708
Glycosaminoglycan degradation	ko00531	53 out of 5157 1.02772929998061%	138 out of 17889 0.771423779976522%	0.0094461	1
Monobactam biosynthesis	ko00261	12 out of 5157 0.232693426410704%	22 out of 17889 0.122980602604953%	0.010003	1
Porphyrin and chlorophyll metabolism	ko00860	49 out of 5157 0.950164824510374%	127 out of 17889 0.709933478674046%	0.0111003	1
Other types of O-glycan biosynthesis	ko00514	19 out of 5157 0.368431258483615%	41 out of 17889 0.229191123036503%	0.0128622	1
beta-Alanine metabolism	ko00410	48 out of 5157 0.930773705642816%	126 out of 17889 0.704343451282911%	0.0153153	1
Purine metabolism	ko00230	109 out of 5157 2.11363195656389%	317 out of 17889 1.77203868298955%	0.0172518	1
Glutathione metabolism	ko00480	83 out of 5157 1.60946286600737%	235 out of 17889 1.31365643691654%	0.017525	1
Glycosphingolipid biosynthesis - ganglio series	ko00604	40 out of 5157 0.775644754702346%	103 out of 17889 0.575772821286824%	0.0180911	1
Limonene and pinene degradation	ko00903	13 out of 5157 0.252084545278263%	26 out of 17889 0.14534071216949%	0.0182394	1
Terpenoid backbone biosynthesis	ko00900	44 out of 5157 0.853209230172581%	116 out of 17889 0.648443177371569%	0.0211996	1
Cysteine and methionine metabolism	ko00270	96 out of 5157 1.86154741128563%	278 out of 17889 1.55402761473531%	0.0215025	1
Sphingolipid metabolism	ko00600	67 out of 5157 1.29920496412643%	189 out of 17889 1.05651517692437%	0.0278793	1
Biotin metabolism	ko00780	18 out of 5157 0.349040139616056%	41 out of 17889 0.229191123036503%	0.0281281	1
Arginine biosynthesis	ko00220	28 out of 5157 0.542951328291642%	70 out of 17889 0.391301917379395%	0.0290674	1
Thiamine metabolism	ko00730	31 out of 5157 0.601124684894318%	79 out of 17889 0.441612163899603%	0.0297098	1
Proteasome	ko03050	51 out of 5157 0.988947062245492%	141 out of 17889 0.788193862149924%	0.0349486	1
Histidine metabolism	ko00340	27 out of 5157 0.523560209424084%	69 out of 17889 0.385711889988261%	0.0419843	1
DNA replication	ko03030	59 out of 5157 1.14407601318596%	168 out of 17889 0.939124601710548%	0.044305	1
Arginine and proline metabolism	ko00330	57 out of 5157 1.10529377545084%	165 out of 17889 0.922354519537146%	0.0632426	1
Amino sugar and nucleotide sugar metabolism	ko00520	159 out of 5157 3.08318789994183%	498 out of 17889 2.78383364078484%	0.0679764	1
2-Oxocarboxylic acid metabolism	ko01210	44 out of 5157 0.853209230172581%	125 out of 17889 0.698753423891777%	0.0714461	1
Base excision repair	ko03410	43 out of 5157 0.833818111305022%	122 out of 17889 0.681983341718374%	0.07268	1
Mannose type O-glycan biosynthesis	ko00515	2 out of 5157 0.0387822377351173%	2 out of 17889 0.0111800547822684%	0.0830926	1
Stilbenoid, diarylheptanoid and gingerol biosynthesis	ko00945	28 out of 5157 0.542951328291642%	77 out of 17889 0.430432109117335%	0.0925195	1
Sulfur metabolism	ko00920	26 out of 5157 0.504169090556525%	72 out of 17889 0.402481972161664%	0.10956	1
Taurine and hypotaurine metabolism	ko00430	7 out of 5157 0.135737832072911%	15 out of 17889 0.0838504108670133%	0.109976	1
C5-Branched dibasic acid metabolism	ko00660	8 out of 5157 0.155128950940469%	18 out of 17889 0.100620493040416%	0.116571	1
Lysine degradation	ko00310	43 out of 5157 0.833818111305022%	127 out of 17889 0.709933478674046%	0.124291	1
Flavonoid biosynthesis	ko00941	53 out of 5157 1.02772929998061%	161 out of 17889 0.899994409972609%	0.143962	1
Biosynthesis of unsaturated fatty acids	ko01040	16 out of 5157 0.310257901880939%	43 out of 17889 0.240371177818771%	0.14796	1
Pantothenate and CoA biosynthesis	ko00770	40 out of 5157 0.775644754702346%	121 out of 17889 0.67639331432724%	0.175641	1
Indole alkaloid biosynthesis	ko00901	6 out of 5157 0.116346713205352%	14 out of 17889 0.078260383475879%	0.190751	1
Anthocyanin biosynthesis	ko00942	4 out of 5157 0.0775644754702346%	9 out of 17889 0.0503102465202079%	0.243959	1
Aminoacyl-tRNA biosynthesis	ko00970	67 out of 5157 1.29920496412643%	215 out of 17889 1.20185588909386%	0.245048	1
Protein processing in endoplasmic reticulum	ko04141	215 out of 5157 4.16909055652511%	716 out of 17889 4.0024596120521%	0.246861	1
Protein export	ko03060	57 out of 5157 1.10529377545084%	182 out of 17889 1.01738498518643%	0.251532	1
Fatty acid degradation	ko00071	44 out of 5157 0.853209230172581%	139 out of 17889 0.777013807367656%	0.257156	1
Folate biosynthesis	ko00790	27 out of 5157 0.523560209424084%	83 out of 17889 0.46397227346414%	0.262712	1
Phenylalanine metabolism	ko00360	39 out of 5157 0.756253635834788%	123 out of 17889 0.687573369109509%	0.268893	1
Alanine, aspartate and glutamate metabolism	ko00250	47 out of 5157 0.911382586775257%	152 out of 17889 0.849684163452401%	0.31148	1
Lipoic acid metabolism	ko00785	4 out of 5157 0.0775644754702346%	10 out of 17889 0.0559002739113422%	0.319374	1
Biosynthesis of various secondary metabolites - part 2	ko00998	2 out of 5157 0.0387822377351173%	4 out of 17889 0.0223601095645369%	0.32768	1
Arachidonic acid metabolism	ko00590	26 out of 5157 0.504169090556525%	83 out of 17889 0.46397227346414%	0.345954	1
Mismatch repair	ko03430	44 out of 5157 0.853209230172581%	144 out of 17889 0.804963944323327%	0.352661	1
Ubiquinone and other terpenoid-quinone biosynthesis	ko00130	49 out of 5157 0.950164824510374%	163 out of 17889 0.911174464754877%	0.392224	1
Linoleic acid metabolism	ko00591	21 out of 5157 0.407213496218732%	68 out of 17889 0.380121862597127%	0.398154	1
Autophagy - other	ko04136	28 out of 5157 0.542951328291642%	92 out of 17889 0.514282519984348%	0.404803	1
Selenocompound metabolism	ko00450	15 out of 5157 0.29086678301338%	48 out of 17889 0.268321314774442%	0.408021	1
Brassinosteroid biosynthesis	ko00905	11 out of 5157 0.213302307543145%	35 out of 17889 0.195650958689698%	0.429038	1
Valine, leucine and isoleucine biosynthesis	ko00290	15 out of 5157 0.29086678301338%	49 out of 17889 0.273911342165577%	0.444299	1
Nucleotide excision repair	ko03420	63 out of 5157 1.2216404886562%	214 out of 17889 1.19626586170272%	0.447085	1
Nicotinate and nicotinamide metabolism	ko00760	26 out of 5157 0.504169090556525%	87 out of 17889 0.486332383028677%	0.453821	1
Non-homologous end-joining	ko03450	5 out of 5157 0.0969555943377933%	16 out of 17889 0.0894404382581475%	0.508611	1
Betalain biosynthesis	ko00965	20 out of 5157 0.387822377351173%	71 out of 17889 0.396891944770529%	0.593419	1
Phosphonate and phosphinate metabolism	ko00440	4 out of 5157 0.0775644754702346%	14 out of 17889 0.078260383475879%	0.608234	1
Sulfur relay system	ko04122	5 out of 5157 0.0969555943377933%	18 out of 17889 0.100620493040416%	0.626856	1
Homologous recombination	ko03440	68 out of 5157 1.31859608299399%	243 out of 17889 1.35837665604561%	0.638773	1
Nitrogen metabolism	ko00910	22 out of 5157 0.42660461508629%	82 out of 17889 0.458382246073006%	0.694846	1
Tyrosine metabolism	ko00350	41 out of 5157 0.795035873569905%	152 out of 17889 0.849684163452401%	0.721874	1
Glycosphingolipid biosynthesis - globo and isoglobo series	ko00603	7 out of 5157 0.135737832072911%	28 out of 17889 0.156520766951758%	0.738155	1
Peroxisome	ko04146	66 out of 5157 1.27981384525887%	249 out of 17889 1.39191682039242%	0.811344	1
Glycosphingolipid biosynthesis - lacto and neolacto series	ko00601	1 out of 5157 0.0193911188675587%	5 out of 17889 0.0279501369556711%	0.817419	1
Ascorbate and aldarate metabolism	ko00053	53 out of 5157 1.02772929998061%	203 out of 17889 1.13477556040025%	0.825613	1
Ubiquitin mediated proteolysis	ko04120	138 out of 5157 2.6759744037231%	512 out of 17889 2.86209402426072%	0.841277	1
Caffeine metabolism	ko00232	1 out of 5157 0.0193911188675587%	6 out of 17889 0.0335401643468053%	0.870068	1
Benzoxazinoid biosynthesis	ko00402	6 out of 5157 0.116346713205352%	29 out of 17889 0.162110794342892%	0.882607	1
Fatty acid elongation	ko00062	18 out of 5157 0.349040139616056%	78 out of 17889 0.436022136508469%	0.896311	1
Isoquinoline alkaloid biosynthesis	ko00950	26 out of 5157 0.504169090556525%	109 out of 17889 0.60931298563363%	0.897269	1
Vitamin B6 metabolism	ko00750	11 out of 5157 0.213302307543145%	51 out of 17889 0.285091396947845%	0.906547	1
Basal transcription factors	ko03022	32 out of 5157 0.620515803761877%	137 out of 17889 0.765833752585388%	0.937396	1
Cyanoamino acid metabolism	ko00460	35 out of 5157 0.678689160364553%	151 out of 17889 0.844094136061267%	0.950851	1
Sesquiterpenoid and triterpenoid biosynthesis	ko00909	14 out of 5157 0.271475664145821%	69 out of 17889 0.385711889988261%	0.959621	1
Glycerolipid metabolism	ko00561	83 out of 5157 1.60946286600737%	338 out of 17889 1.88942925820337%	0.966508	1
Flavone and flavonol biosynthesis	ko00944	8 out of 5157 0.155128950940469%	45 out of 17889 0.25155123260104%	0.969523	1
Tryptophan metabolism	ko00380	38 out of 5157 0.736862516967229%	170 out of 17889 0.950304656492817%	0.977079	1
Starch and sucrose metabolism	ko00500	185 out of 5157 3.58735699049835%	723 out of 17889 4.04158980379004%	0.978463	1
Galactose metabolism	ko00052	79 out of 5157 1.53189839053713%	329 out of 17889 1.83911901168316%	0.979132	1
Glycerophospholipid metabolism	ko00564	77 out of 5157 1.49311615280202%	322 out of 17889 1.79998881994522%	0.980125	1
alpha-Linolenic acid metabolism	ko00592	29 out of 5157 0.562342447159201%	137 out of 17889 0.765833752585388%	0.983601	1
ABC transporters	ko02010	55 out of 5157 1.06651153771573%	240 out of 17889 1.34160657387221%	0.984069	1
Circadian rhythm - plant	ko04712	63 out of 5157 1.2216404886562%	272 out of 17889 1.52048745038851%	0.985532	1
Tropane, piperidine and pyridine alkaloid biosynthesis	ko00960	19 out of 5157 0.368431258483615%	97 out of 17889 0.542232656940019%	0.985977	1
Carotenoid biosynthesis	ko00906	21 out of 5157 0.407213496218732%	109 out of 17889 0.60931298563363%	0.991767	1
Ribosome biogenesis in eukaryotes	ko03008	64 out of 5157 1.24103160752375%	285 out of 17889 1.59315780647325%	0.994006	1
Phenylpropanoid biosynthesis	ko00940	146 out of 5157 2.83110335466356%	603 out of 17889 3.37078651685393%	0.995722	1
Monoterpenoid biosynthesis	ko00902	2 out of 5157 0.0387822377351173%	23 out of 17889 0.128570629996087%	0.995881	1
mRNA surveillance pathway	ko03015	89 out of 5157 1.72580957921272%	389 out of 17889 2.17452065515121%	0.996826	1
Cutin, suberine and wax biosynthesis	ko00073	23 out of 5157 0.445995733953849%	124 out of 17889 0.693163396500643%	0.996938	1
Isoflavonoid biosynthesis	ko00943	16 out of 5157 0.310257901880939%	97 out of 17889 0.542232656940019%	0.998397	1
Ether lipid metabolism	ko00565	18 out of 5157 0.349040139616056%	116 out of 17889 0.648443177371569%	0.999742	1
Plant hormone signal transduction	ko04075	379 out of 5157 7.34923405080473%	1537 out of 17889 8.59187210017329%	0.999942	1
RNA transport	ko03013	120 out of 5157 2.32693426410704%	553 out of 17889 3.09128514729722%	0.999953	1
Pentose and glucuronate interconversions	ko00040	116 out of 5157 2.2493697886368%	548 out of 17889 3.06333501034155%	0.999986	1
RNA degradation	ko03018	86 out of 5157 1.66763622261004%	439 out of 17889 2.45402202470792%	0.999997	1
MAPK signaling pathway - plant	ko04016	205 out of 5157 3.97517936784952%	915 out of 17889 5.11487506288781%	0.999997	1
RNA polymerase	ko03020	27 out of 5157 0.523560209424084%	192 out of 17889 1.07328525909777%	1	1
Diterpenoid biosynthesis	ko00904	12 out of 5157 0.232693426410704%	132 out of 17889 0.737883615629717%	1	1
Spliceosome	ko03040	117 out of 5157 2.26876090750436%	648 out of 17889 3.62233774945497%	1	1
Zeatin biosynthesis	ko00908	11 out of 5157 0.213302307543145%	283 out of 17889 1.58197775169098%	1	1
Plant-pathogen interaction	ko04626	306 out of 5157 5.93368237347295%	1599 out of 17889 8.93845379842361%	1	1

## Sheet: Purple module
#Kegg_pathway	ko_id	Cluter_frequency	Genome_frequency	P-value	Corrected_P-value
Valine, leucine and isoleucine biosynthesis	ko00290	2 out of 36 5.55555555555556%	49 out of 17889 0.273911342165577%	0.00436332	0.161443
Lipoic acid metabolism	ko00785	1 out of 36 2.77777777777778%	10 out of 17889 0.0559002739113422%	0.0199478	0.738069
Pantothenate and CoA biosynthesis	ko00770	2 out of 36 5.55555555555556%	121 out of 17889 0.67639331432724%	0.0246087	0.910522
2-Oxocarboxylic acid metabolism	ko01210	2 out of 36 5.55555555555556%	125 out of 17889 0.698753423891777%	0.0261386	0.96713
Glucosinolate biosynthesis	ko00966	1 out of 36 2.77777777777778%	23 out of 17889 0.128570629996087%	0.0453024	1
RNA degradation	ko03018	3 out of 36 8.33333333333333%	439 out of 17889 2.45402202470792%	0.0577214	1
Glutathione metabolism	ko00480	2 out of 36 5.55555555555556%	235 out of 17889 1.31365643691654%	0.080906	1
Homologous recombination	ko03440	2 out of 36 5.55555555555556%	243 out of 17889 1.35837665604561%	0.0856729	1
Cysteine and methionine metabolism	ko00270	2 out of 36 5.55555555555556%	278 out of 17889 1.55402761473531%	0.107472	1
Biosynthesis of amino acids	ko01230	3 out of 36 8.33333333333333%	583 out of 17889 3.25898596903125%	0.111612	1
Starch and sucrose metabolism	ko00500	3 out of 36 8.33333333333333%	723 out of 17889 4.04158980379004%	0.176939	1
Carotenoid biosynthesis	ko00906	1 out of 36 2.77777777777778%	109 out of 17889 0.60931298563363%	0.197674	1
Terpenoid backbone biosynthesis	ko00900	1 out of 36 2.77777777777778%	116 out of 17889 0.648443177371569%	0.208978	1
Lysine degradation	ko00310	1 out of 36 2.77777777777778%	127 out of 17889 0.709933478674046%	0.22643	1
Citrate cycle (TCA cycle)	ko00020	1 out of 36 2.77777777777778%	130 out of 17889 0.726703560847448%	0.231125	1
Cyanoamino acid metabolism	ko00460	1 out of 36 2.77777777777778%	151 out of 17889 0.844094136061267%	0.263218	1
Amino sugar and nucleotide sugar metabolism	ko00520	2 out of 36 5.55555555555556%	498 out of 17889 2.78383364078484%	0.26502	1
Pentose phosphate pathway	ko00030	1 out of 36 2.77777777777778%	156 out of 17889 0.872044273016938%	0.270666	1
Ubiquitin mediated proteolysis	ko04120	2 out of 36 5.55555555555556%	512 out of 17889 2.86209402426072%	0.275545	1
Flavonoid biosynthesis	ko00941	1 out of 36 2.77777777777778%	161 out of 17889 0.899994409972609%	0.27804	1
Ubiquinone and other terpenoid-quinone biosynthesis	ko00130	1 out of 36 2.77777777777778%	163 out of 17889 0.911174464754877%	0.280969	1
Valine, leucine and isoleucine degradation	ko00280	1 out of 36 2.77777777777778%	175 out of 17889 0.978254793448488%	0.298303	1
RNA transport	ko03013	2 out of 36 5.55555555555556%	553 out of 17889 3.09128514729722%	0.306334	1
Pyrimidine metabolism	ko00240	1 out of 36 2.77777777777778%	183 out of 17889 1.02297501257756%	0.309633	1
Phenylpropanoid biosynthesis	ko00940	2 out of 36 5.55555555555556%	603 out of 17889 3.37078651685393%	0.343608	1
Aminoacyl-tRNA biosynthesis	ko00970	1 out of 36 2.77777777777778%	215 out of 17889 1.20185588909386%	0.3532	1
Spliceosome	ko03040	2 out of 36 5.55555555555556%	648 out of 17889 3.62233774945497%	0.376676	1
Carbon metabolism	ko01200	2 out of 36 5.55555555555556%	657 out of 17889 3.67264799597518%	0.383219	1
ABC transporters	ko02010	1 out of 36 2.77777777777778%	240 out of 17889 1.34160657387221%	0.385365	1
Peroxisome	ko04146	1 out of 36 2.77777777777778%	249 out of 17889 1.39191682039242%	0.39656	1
Inositol phosphate metabolism	ko00562	1 out of 36 2.77777777777778%	255 out of 17889 1.42545698473923%	0.403912	1
Zeatin biosynthesis	ko00908	1 out of 36 2.77777777777778%	283 out of 17889 1.58197775169098%	0.437088	1
Purine metabolism	ko00230	1 out of 36 2.77777777777778%	317 out of 17889 1.77203868298955%	0.474965	1
Glycolysis / Gluconeogenesis	ko00010	1 out of 36 2.77777777777778%	373 out of 17889 2.08508021689306%	0.532014	1
MAPK signaling pathway - plant	ko04016	2 out of 36 5.55555555555556%	915 out of 17889 5.11487506288781%	0.556047	1
Plant-pathogen interaction	ko04626	2 out of 36 5.55555555555556%	1599 out of 17889 8.93845379842361%	0.844497	1
Plant hormone signal transduction	ko04075	1 out of 36 2.77777777777778%	1537 out of 17889 8.59187210017329%	0.960734	1

## Sheet: Yellow module
#Kegg_pathway	ko_id	Cluter_frequency	Genome_frequency	P-value	Corrected_P-value
Ubiquitin mediated proteolysis	ko04120	5 out of 45 11.1111111111111%	512 out of 17889 2.86209402426072%	0.00896328	0.358531
Taurine and hypotaurine metabolism	ko00430	1 out of 45 2.22222222222222%	15 out of 17889 0.0838504108670133%	0.0370897	1
Non-homologous end-joining	ko03450	1 out of 45 2.22222222222222%	16 out of 17889 0.0894404382581475%	0.039514	1
Ubiquinone and other terpenoid-quinone biosynthesis	ko00130	2 out of 45 4.44444444444444%	163 out of 17889 0.911174464754877%	0.063316	1
RNA polymerase	ko03020	2 out of 45 4.44444444444444%	192 out of 17889 1.07328525909777%	0.0840499	1
Protein processing in endoplasmic reticulum	ko04141	4 out of 45 8.88888888888889%	716 out of 17889 4.0024596120521%	0.104647	1
Thiamine metabolism	ko00730	1 out of 45 2.22222222222222%	79 out of 17889 0.441612163899603%	0.180787	1
Arachidonic acid metabolism	ko00590	1 out of 45 2.22222222222222%	83 out of 17889 0.46397227346414%	0.189036	1
Galactose metabolism	ko00052	2 out of 45 4.44444444444444%	329 out of 17889 1.83911901168316%	0.200481	1
Ribosome	ko03010	3 out of 45 6.66666666666667%	686 out of 17889 3.83475879031807%	0.247979	1
Terpenoid backbone biosynthesis	ko00900	1 out of 45 2.22222222222222%	116 out of 17889 0.648443177371569%	0.254061	1
Phenylalanine, tyrosine and tryptophan biosynthesis	ko00400	1 out of 45 2.22222222222222%	124 out of 17889 0.693163396500643%	0.26904	1
Porphyrin and chlorophyll metabolism	ko00860	1 out of 45 2.22222222222222%	127 out of 17889 0.709933478674046%	0.274581	1
Citrate cycle (TCA cycle)	ko00020	1 out of 45 2.22222222222222%	130 out of 17889 0.726703560847448%	0.280081	1
Basal transcription factors	ko03022	1 out of 45 2.22222222222222%	137 out of 17889 0.765833752585388%	0.292756	1
Cyanoamino acid metabolism	ko00460	1 out of 45 2.22222222222222%	151 out of 17889 0.844094136061267%	0.317455	1
Flavonoid biosynthesis	ko00941	1 out of 45 2.22222222222222%	161 out of 17889 0.899994409972609%	0.334578	1
Arginine and proline metabolism	ko00330	1 out of 45 2.22222222222222%	165 out of 17889 0.922354519537146%	0.34131	1
Fructose and mannose metabolism	ko00051	1 out of 45 2.22222222222222%	195 out of 17889 1.09005534127117%	0.389715	1
Phagosome	ko04145	1 out of 45 2.22222222222222%	201 out of 17889 1.12359550561798%	0.39897	1
Ascorbate and aldarate metabolism	ko00053	1 out of 45 2.22222222222222%	203 out of 17889 1.13477556040025%	0.402024	1
Pentose and glucuronate interconversions	ko00040	2 out of 45 4.44444444444444%	548 out of 17889 3.06333501034155%	0.402915	1
RNA transport	ko03013	2 out of 45 4.44444444444444%	553 out of 17889 3.09128514729722%	0.407361	1
Aminoacyl-tRNA biosynthesis	ko00970	1 out of 45 2.22222222222222%	215 out of 17889 1.20185588909386%	0.420034	1
Glyoxylate and dicarboxylate metabolism	ko00630	1 out of 45 2.22222222222222%	218 out of 17889 1.21862597126726%	0.424453	1
Glutathione metabolism	ko00480	1 out of 45 2.22222222222222%	235 out of 17889 1.31365643691654%	0.448879	1
ABC transporters	ko02010	1 out of 45 2.22222222222222%	240 out of 17889 1.34160657387221%	0.455868	1
Pyruvate metabolism	ko00620	1 out of 45 2.22222222222222%	246 out of 17889 1.37514673821902%	0.46414	1
Circadian rhythm - plant	ko04712	1 out of 45 2.22222222222222%	272 out of 17889 1.52048745038851%	0.49859	1
Cysteine and methionine metabolism	ko00270	1 out of 45 2.22222222222222%	278 out of 17889 1.55402761473531%	0.506226	1
Zeatin biosynthesis	ko00908	1 out of 45 2.22222222222222%	283 out of 17889 1.58197775169098%	0.512503	1
Starch and sucrose metabolism	ko00500	2 out of 45 4.44444444444444%	723 out of 17889 4.04158980379004%	0.547989	1
Plant hormone signal transduction	ko04075	4 out of 45 8.88888888888889%	1537 out of 17889 8.59187210017329%	0.548072	1
Purine metabolism	ko00230	1 out of 45 2.22222222222222%	317 out of 17889 1.77203868298955%	0.553166	1
RNA degradation	ko03018	1 out of 45 2.22222222222222%	439 out of 17889 2.45402202470792%	0.673551	1
Amino sugar and nucleotide sugar metabolism	ko00520	1 out of 45 2.22222222222222%	498 out of 17889 2.78383364078484%	0.719752	1
Biosynthesis of amino acids	ko01230	1 out of 45 2.22222222222222%	583 out of 17889 3.25898596903125%	0.775267	1
Carbon metabolism	ko01200	1 out of 45 2.22222222222222%	657 out of 17889 3.67264799597518%	0.814726	1
MAPK signaling pathway - plant	ko04016	1 out of 45 2.22222222222222%	915 out of 17889 5.11487506288781%	0.90611	1
Plant-pathogen interaction	ko04626	1 out of 45 2.22222222222222%	1599 out of 17889 8.93845379842361%	0.985287	1
