# Supplementary material for: Transcriptomic Analysis Reveals the Regulatory Networks and Hub Genes Controlling the Unsaturated Fatty Acid Contents of Developing Seed in Soybean
Source: Front Plant Sci. 2022 May 12;13:876371. doi: 10.3389/fpls.2022.876371 (PMC9134122; doi:10.3389/fpls.2022.876371)
Supplement: Supplementary Table 6 — Genes of “plasma membrane” and “monolayer-surrounded lipid storage body.” [file Table_8.XLSX]

## Sheet: plasma membrane
gene_name	HO40a_FPKM	HO40b_FPKM	HO40c_FPKM	LO40a_FPKM	LO40b_FPKM	LO40c_FPKM	FDR	log2FC	regulated	COG_class	COG_class_annotation	GO_annotation	KEGG_annotation	KEGG_pathway_annotation	KOG_class	KOG_class_annotation	Pfam_annotation	Swiss_Prot_annotation	eggNOG_class	eggNOG_class_annotation	NR_annotation	GO_second_level_annotation
gene-LOC100790298	3.15396	2.92318	3.36612	0	0	0	1.95e-10	-7.48955	down	--	--	Biological Process: amino acid transmembrane transport (GO:0003333);; Cellular Component: plasma membrane (GO:0005886);; Molecular Function: amino acid transmembrane transporter activity (GO:0015171);; Cellular Component: integral component of membrane (GO:0016021);;	--	--	[E]	Amino acid transport and metabolism	Transmembrane amino acid transporter protein	Amino acid permease 8 OS=Arabidopsis thaliana OX=3702 GN=AAP8 PE=1 SV=1	E	Amino acid transport and metabolism	amino acid permease 8 isoform X1 [Glycine max]	biological process: single-organism process (GO:0044699);; biological process: localization (GO:0051179);; cellular component: cell (GO:0005623);; cellular component: membrane (GO:0016020);; cellular component: cell part (GO:0044464);; molecular function: transporter activity (GO:0005215);; cellular component: membrane part (GO:0044425)
gene-LOC100819546	4.68494	3.49231	4.84933	3.76724	3.67983	2.17313	0.00487443	1.04282	up	[T]	Signal transduction mechanisms	Molecular Function: transmembrane receptor protein serine/threonine kinase activity (GO:0004675);; Molecular Function: ATP binding (GO:0005524);; Cellular Component: plasma membrane (GO:0005886);; Biological Process: protein phosphorylation (GO:0006468);;	K01180|2.4e-82|cmax:111487562|K01180 endo-1,3(4)-beta-glucanase [EC:3.2.1.6] | (RefSeq) uncharacterized protein LOC111487562	--	[T]	Signal transduction mechanisms	Protein tyrosine and serine/threonine kinase	Inactive protein kinase SELMODRAFT_444075 OS=Selaginella moellendorffii OX=88036 GN=SELMODRAFT_444075 PE=2 SV=1	T	Signal transduction mechanisms	inactive protein kinase SELMODRAFT_444075 [Glycine max]	molecular function: catalytic activity (GO:0003824);; molecular function: signal transducer activity (GO:0004871);; molecular function: molecular transducer activity (GO:0060089);; biological process: metabolic process (GO:0008152);; biological process: cellular process (GO:0009987);; biological process: signaling (GO:0023052);; biological process: single-organism process (GO:0044699);; biologica…
gene-LOC100791287	4.22857	3.90754	4.62149	6.92844	5.66027	5.5851	1.39e-16	1.9561	up	--	--	Cellular Component: plasma membrane (GO:0005886);; Cellular Component: plasmodesma (GO:0009506);; Cellular Component: integral component of membrane (GO:0016021);;	--	--	--	--	Tetraspanin family	Tetraspanin-7 OS=Arabidopsis thaliana OX=3702 GN=TET7 PE=2 SV=1	S	Function unknown	tetraspanin-7 [Glycine max]	cellular component: cell (GO:0005623);; cellular component: membrane (GO:0016020);; cellular component: cell part (GO:0044464);; cellular component: cell junction (GO:0030054);; cellular component: membrane part (GO:0044425)
gene-LOC100783342	12.9965	19.6565	16.3619	1.76678	1.34775	3.46178	0.000301738	-1.45322	down	--	--	Cellular Component: Golgi membrane (GO:0000139);; Biological Process: polysaccharide biosynthetic process (GO:0000271);; Cellular Component: cellular_component (GO:0005575);; Cellular Component: intracellular (GO:0005622);; Cellular Component: cell (GO:0005623);; Cellular Component: cytoplasm (GO:0005737);; Cellular Component: endosome (GO:0005768);; Cellular Component: vacuole (GO:0005773);; Cel…	K23871|1.3e-140|gmx:100783342|K23871 putative pectin methylesterase [EC:2.1.1.-] | (RefSeq) uncharacterized protein LOC100783342	--	--	--	--	Probable pectin methylesterase CGR2 OS=Arabidopsis thaliana OX=3702 GN=CGR2 PE=2 SV=1	S	Function unknown	uncharacterized protein LOC100783342 [Glycine max]	cellular component: cell (GO:0005623);; cellular component: membrane (GO:0016020);; cellular component: organelle (GO:0043226);; cellular component: organelle part (GO:0044422);; cellular component: cell part (GO:0044464);; biological process: metabolic process (GO:0008152);; biological process: single-organism process (GO:0044699);; biological process: multicellular organismal process (GO:003250…
gene-LOC100798233	0.904658	0.282671	0.72642	0.013105	0	0	1.39e-06	-4.96485	down	[U]	Intracellular trafficking, secretion, and vesicular transport	Molecular Function: protein serine/threonine kinase activity (GO:0004674);; Molecular Function: ATP binding (GO:0005524);; Cellular Component: plasma membrane (GO:0005886);; Cellular Component: integral component of membrane (GO:0016021);; Biological Process: protein autophosphorylation (GO:0046777);;	K01180|9.0e-68|cmax:111487562|K01180 endo-1,3(4)-beta-glucanase [EC:3.2.1.6] | (RefSeq) uncharacterized protein LOC111487562	--	--	--	Protein tyrosine and serine/threonine kinase	Probable LRR receptor-like serine/threonine-protein kinase At1g56140 OS=Arabidopsis thaliana OX=3702 GN=At1g56140 PE=2 SV=2	T	Signal transduction mechanisms	probable LRR receptor-like serine/threonine-protein kinase At1g56130 isoform X1 [Glycine max]	molecular function: catalytic activity (GO:0003824);; biological process: metabolic process (GO:0008152);; biological process: cellular process (GO:0009987);; molecular function: binding (GO:0005488);; cellular component: cell (GO:0005623);; cellular component: membrane (GO:0016020);; cellular component: cell part (GO:0044464);; cellular component: membrane part (GO:0044425)
gene-LOC100804422	5.74805	3.72284	6.06007	5.29553	6.62184	4.92437	1.49e-06	1.60374	up	[P]	Inorganic ion transport and metabolism	Molecular Function: ATP binding (GO:0005524);; Cellular Component: plasma membrane (GO:0005886);; Molecular Function: hydrogen-exporting ATPase activity, phosphorylative mechanism (GO:0008553);; Cellular Component: integral component of membrane (GO:0016021);; Molecular Function: ATPase activity (GO:0016887);; Biological Process: regulation of intracellular pH (GO:0051453);; Biological Process: h…	K01535|0.0e+00|gmx:100804422|K01535 H+-transporting ATPase [EC:7.1.2.1] | (RefSeq) plasma membrane ATPase 4	Oxidative phosphorylation (ko00190)	[P]	Inorganic ion transport and metabolism	E1-E2 ATPase	Plasma membrane ATPase 4 OS=Nicotiana plumbaginifolia OX=4092 GN=PMA4 PE=2 SV=1	P	Inorganic ion transport and metabolism	plasma membrane ATPase 4 [Glycine max]	molecular function: binding (GO:0005488);; cellular component: cell (GO:0005623);; cellular component: membrane (GO:0016020);; cellular component: cell part (GO:0044464);; molecular function: catalytic activity (GO:0003824);; molecular function: transporter activity (GO:0005215);; biological process: single-organism process (GO:0044699);; biological process: localization (GO:0051179);; cellular c…
--	6.9397	4.48954	6.59397	1.09909	0.47401	1.33697	0.00242846	-1.23945	down	--	--	Cellular Component: plasma membrane (GO:0005886);; Biological Process: protein transport (GO:0015031);; Cellular Component: integral component of membrane (GO:0016021);; Cellular Component: transport vesicle membrane (GO:0030658);;	K19995|2.8e-75|gmx:100777657|K19995 secretory carrier-associated membrane protein | (RefSeq) secretory carrier-associated membrane protein	--	[U]	Intracellular trafficking, secretion, and vesicular transport	SCAMP family	Putative secretory carrier-associated membrane protein 1 OS=Oryza sativa subsp. indica OX=39946 GN=SCAMP1 PE=3 SV=1	U	Intracellular trafficking, secretion, and vesicular transport	Secretory carrier-associated membrane protein 1 isoform B [Glycine soja]	cellular component: cell (GO:0005623);; cellular component: membrane (GO:0016020);; cellular component: cell part (GO:0044464);; biological process: localization (GO:0051179);; cellular component: membrane part (GO:0044425);; cellular component: organelle (GO:0043226);; cellular component: organelle part (GO:0044422)
gene-LOC100792688	101.824	249.108	115.139	0	0	0	2.39e-39	-12.6506	down	[P]	Inorganic ion transport and metabolism	Molecular Function: ferroxidase activity (GO:0004322);; Molecular Function: copper ion binding (GO:0005507);; Cellular Component: plasma membrane (GO:0005886);; Biological Process: iron ion transport (GO:0006826);; Biological Process: lignin catabolic process (GO:0046274);; Cellular Component: apoplast (GO:0048046);; Molecular Function: hydroquinone:oxygen oxidoreductase activity (GO:0052716);; B…	K05909|0.0e+00|gmx:100792688|K05909 laccase [EC:1.10.3.2] | (RefSeq) laccase-2	--	[Q]	Secondary metabolites biosynthesis, transport and catabolism	Multicopper oxidase	Laccase-2 OS=Arabidopsis thaliana OX=3702 GN=LAC2 PE=2 SV=1	Q	Secondary metabolites biosynthesis, transport and catabolism	laccase-2 [Glycine max]	molecular function: catalytic activity (GO:0003824);; biological process: metabolic process (GO:0008152);; biological process: single-organism process (GO:0044699);; molecular function: binding (GO:0005488);; cellular component: cell (GO:0005623);; cellular component: membrane (GO:0016020);; cellular component: cell part (GO:0044464);; biological process: localization (GO:0051179);; biological pr…
gene-LOC100797835	1.07875	1.05404	0.961244	0	0	0	4.03e-07	-6.401	down	[P]	Inorganic ion transport and metabolism	Cellular Component: plasma membrane (GO:0005886);; Molecular Function: cation transmembrane transporter activity (GO:0008324);; Molecular Function: sodium ion transmembrane transporter activity (GO:0015081);; Cellular Component: integral component of membrane (GO:0016021);;	--	--	[P]	Inorganic ion transport and metabolism	Cation transport protein	Probable cation transporter HKT6 OS=Oryza sativa subsp. japonica OX=39947 GN=HKT6 PE=2 SV=2	P	Inorganic ion transport and metabolism	sodium transporter HKT1 [Glycine max]	cellular component: cell (GO:0005623);; cellular component: membrane (GO:0016020);; cellular component: cell part (GO:0044464);; molecular function: transporter activity (GO:0005215);; biological process: localization (GO:0051179);; cellular component: membrane part (GO:0044425)
gene-LOC100796821	2.68548	1.46486	2.91937	0.084034	0.05653	0.116444	3.32e-12	-3.10707	down	[T]	Signal transduction mechanisms	Molecular Function: protein serine/threonine kinase activity (GO:0004674);; Molecular Function: ATP binding (GO:0005524);; Cellular Component: plasma membrane (GO:0005886);; Biological Process: protein phosphorylation (GO:0006468);; Cellular Component: integral component of membrane (GO:0016021);; Biological Process: recognition of pollen (GO:0048544);;	K24104|7.6e-70|thj:104799061|K24104 GPN-loop GTPase | (RefSeq) LOW QUALITY PROTEIN: uncharacterized protein LOC104799061	--	--	--	Protein tyrosine and serine/threonine kinase	G-type lectin S-receptor-like serine/threonine-protein kinase At4g27290 OS=Arabidopsis thaliana OX=3702 GN=At4g27290 PE=3 SV=4	--	--	G-type lectin S-receptor-like serine/threonine-protein kinase At4g27290 isoform X1 [Glycine max]	molecular function: catalytic activity (GO:0003824);; biological process: metabolic process (GO:0008152);; biological process: cellular process (GO:0009987);; molecular function: binding (GO:0005488);; cellular component: cell (GO:0005623);; cellular component: membrane (GO:0016020);; cellular component: cell part (GO:0044464);; cellular component: membrane part (GO:0044425);; biological process:…
gene-LOC100802293	1.73978	3.21406	2.02637	0.265525	0.292352	0.154888	0.000817258	-1.74812	down	[T]	Signal transduction mechanisms	Biological Process: defense response to oomycetes (GO:0002229);; Molecular Function: transmembrane receptor protein serine/threonine kinase activity (GO:0004675);; Molecular Function: ATP binding (GO:0005524);; Cellular Component: plasma membrane (GO:0005886);; Biological Process: defense response (GO:0006952);; Cellular Component: integral component of membrane (GO:0016021);; Molecular Function:…	K01176|1.8e-69|sbi:8065370|K01176 alpha-amylase [EC:3.2.1.1] | (RefSeq) alpha-amylase isozyme 2A	Starch and sucrose metabolism (ko00500)	--	--	Legume lectin domain	L-type lectin-domain containing receptor kinase IV.1 OS=Arabidopsis thaliana OX=3702 GN=LECRK41 PE=2 SV=1	T	Signal transduction mechanisms	L-type lectin-domain containing receptor kinase IV.1 [Glycine max]	biological process: response to stimulus (GO:0050896);; biological process: multi-organism process (GO:0051704);; molecular function: catalytic activity (GO:0003824);; molecular function: signal transducer activity (GO:0004871);; molecular function: molecular transducer activity (GO:0060089);; biological process: metabolic process (GO:0008152);; biological process: cellular process (GO:0009987);;…
gene-LOC100790956	0.084494	0.05695	0	0.891637	0.625522	0.389122	1.35e-10	4.81463	up	--	--	Cellular Component: plasma membrane (GO:0005886);;	--	--	--	--	--	Uncharacterized GPI-anchored protein At1g61900 OS=Arabidopsis thaliana OX=3702 GN=At1g61900 PE=2 SV=1	S	Function unknown	uncharacterized GPI-anchored protein At1g61900 isoform X1 [Glycine max]	cellular component: cell (GO:0005623);; cellular component: membrane (GO:0016020);; cellular component: cell part (GO:0044464)
gene-LOC100776324	0.290329	0.369183	0.459665	0.022104	0.006357	0.035443	0.00127902	-2.46871	down	[M]	Cell wall/membrane/envelope biogenesis	Molecular Function: protein kinase activity (GO:0004672);; Molecular Function: ATP binding (GO:0005524);; Cellular Component: plasma membrane (GO:0005886);; Cellular Component: plasmodesma (GO:0009506);; Cellular Component: integral component of membrane (GO:0016021);; Biological Process: protein autophosphorylation (GO:0046777);;	K13435|5.6e-81|spen:107018783|K13435 serine/threonine-protein kinase Pto | (RefSeq) receptor-like protein kinase HERK 1 isoform X2	Plant-pathogen interaction (ko04626)	[T]	Signal transduction mechanisms	Protein tyrosine and serine/threonine kinase	Receptor-like protein kinase FERONIA OS=Arabidopsis thaliana OX=3702 GN=FER PE=1 SV=1	T	Signal transduction mechanisms	receptor-like protein kinase FERONIA [Glycine max]	molecular function: catalytic activity (GO:0003824);; biological process: metabolic process (GO:0008152);; biological process: cellular process (GO:0009987);; molecular function: binding (GO:0005488);; cellular component: cell (GO:0005623);; cellular component: membrane (GO:0016020);; cellular component: cell part (GO:0044464);; cellular component: cell junction (GO:0030054);; cellular component:…
gene-LOC100805558	7.37159	9.69769	6.93208	10.5418	4.61038	8.64025	2.79e-05	1.37193	up	[O]	Posttranslational modification, protein turnover, chaperones	Molecular Function: molecular_function (GO:0003674);; Molecular Function: binding (GO:0005488);; Molecular Function: protein binding (GO:0005515);; Cellular Component: cellular_component (GO:0005575);; Cellular Component: intracellular (GO:0005622);; Cellular Component: cell (GO:0005623);; Cellular Component: cytoplasm (GO:0005737);; Cellular Component: vacuole (GO:0005773);; Cellular Component: …	--	--	[C]	Energy production and conversion	SPFH domain / Band 7 family	Hypersensitive-induced response protein 2 OS=Arabidopsis thaliana OX=3702 GN=HIR2 PE=1 SV=1	C	Energy production and conversion	SPFH_like_u4 domain-containing protein HIR1-like [Glycine max]	molecular function: binding (GO:0005488);; cellular component: cell (GO:0005623);; cellular component: cell part (GO:0044464);; cellular component: organelle (GO:0043226);; cellular component: membrane (GO:0016020);; cellular component: organelle part (GO:0044422);; cellular component: cell junction (GO:0030054);; cellular component: symplast (GO:0055044)
gene-GMIQD3	0.768614	0.852036	1.76962	1.36454	1.22355	1.4263	0.000146194	1.67595	up	--	--	Molecular Function: protein binding (GO:0005515);; Cellular Component: cellular_component (GO:0005575);; Cellular Component: intracellular (GO:0005622);; Cellular Component: cell (GO:0005623);; Cellular Component: cytoplasm (GO:0005737);; Cellular Component: cytosol (GO:0005829);; Cellular Component: cytoskeleton (GO:0005856);; Cellular Component: microtubule associated complex (GO:0005875);; Cel…	K14561|9.9e-12|gmx:102670478|K14561 U3 small nucleolar ribonucleoprotein protein IMP4 | (RefSeq) uncharacterized protein LOC102670478 isoform X1	Ribosome biogenesis in eukaryotes (ko03008)	--	--	Protein of unknown function (DUF4005)	Protein IQ-DOMAIN 14 OS=Arabidopsis thaliana OX=3702 GN=IQD14 PE=1 SV=1	S	Function unknown	protein IQ-DOMAIN 14 isoform X2 [Glycine max]	molecular function: binding (GO:0005488);; cellular component: cell (GO:0005623);; cellular component: cell part (GO:0044464);; cellular component: organelle (GO:0043226);; cellular component: macromolecular complex (GO:0032991);; cellular component: organelle part (GO:0044422);; cellular component: membrane (GO:0016020)
gene-LOC100793387	25.7633	25.0135	24.4771	2.37457	2.71954	3.2115	2.07e-12	-1.7013	down	[P]	Inorganic ion transport and metabolism	Cellular Component: plasma membrane (GO:0005886);; Biological Process: potassium ion transport (GO:0006813);; Molecular Function: potassium ion transmembrane transporter activity (GO:0015079);; Cellular Component: membrane (GO:0016020);; Cellular Component: integral component of membrane (GO:0016021);;	K03549|0.0e+00|gmx:100793387|K03549 KUP system potassium uptake protein | (RefSeq) potassium transporter 8	--	--	--	K+ potassium transporter	Potassium transporter 8 OS=Arabidopsis thaliana OX=3702 GN=POT8 PE=2 SV=2	P	Inorganic ion transport and metabolism	potassium transporter 8 [Glycine max]	cellular component: cell (GO:0005623);; cellular component: membrane (GO:0016020);; cellular component: cell part (GO:0044464);; biological process: localization (GO:0051179);; molecular function: transporter activity (GO:0005215);; cellular component: membrane part (GO:0044425)
gene-LOC100776472	1.74523	3.18782	1.87954	16.5658	13.622	16.4076	3.86e-40	4.16246	up	[E]	Amino acid transport and metabolism	Cellular Component: plasma membrane (GO:0005886);; Molecular Function: peptide:proton symporter activity (GO:0015333);; Cellular Component: integral component of membrane (GO:0016021);; Molecular Function: oligopeptide transmembrane transporter activity (GO:0035673);; Molecular Function: peptide transmembrane transporter activity (GO:1904680);;	K14638|4.5e-200|cmax:111493070|K14638 solute carrier family 15 (peptide/histidine transporter), member 3/4 | (RefSeq) protein NRT1/ PTR FAMILY 2.13-like	--	[E]	Amino acid transport and metabolism	POT family	Protein NRT1/ PTR FAMILY 2.13 OS=Arabidopsis thaliana OX=3702 GN=NPF2.13 PE=1 SV=1	E	Amino acid transport and metabolism	protein NRT1/ PTR FAMILY 2.13 [Glycine max]	cellular component: cell (GO:0005623);; cellular component: membrane (GO:0016020);; cellular component: cell part (GO:0044464);; molecular function: transporter activity (GO:0005215);; biological process: single-organism process (GO:0044699);; biological process: localization (GO:0051179);; cellular component: membrane part (GO:0044425)
gene-LOC100807692	6.44038	11.7709	6.51488	0.409932	0.563285	0.055061	3.27e-05	-2.88382	down	[T]	Signal transduction mechanisms	Molecular Function: ATP binding (GO:0005524);; Cellular Component: plasma membrane (GO:0005886);; Cellular Component: integral component of membrane (GO:0016021);; Molecular Function: ATPase activity (GO:0016887);; Molecular Function: ATPase activity, coupled to transmembrane movement of substances (GO:0042626);; Biological Process: transmembrane transport (GO:0055085);;	K05681|1.9e-61|cme:CYME_CMS467C|K05681 ATP-binding cassette, subfamily G (WHITE), member 2 | (RefSeq) ATP-binding cassette, sub-family G, member 2	ABC transporters (ko02010)	[Q]	Secondary metabolites biosynthesis, transport and catabolism	ABC-2 type transporter	ABC transporter G family member 15 OS=Arabidopsis thaliana OX=3702 GN=ABCG15 PE=2 SV=2	Q	Secondary metabolites biosynthesis, transport and catabolism	ABC transporter G family member 15 isoform X1 [Glycine max]	molecular function: binding (GO:0005488);; cellular component: cell (GO:0005623);; cellular component: membrane (GO:0016020);; cellular component: cell part (GO:0044464);; cellular component: membrane part (GO:0044425);; molecular function: catalytic activity (GO:0003824);; molecular function: transporter activity (GO:0005215);; biological process: localization (GO:0051179)
gene-LOC100794115	0.54344	1.54778	0.887729	0	0	0	1.48e-07	-6.6283	down	[I]	Lipid transport and metabolism	Molecular Function: phospholipase D activity (GO:0004630);; Molecular Function: calcium ion binding (GO:0005509);; Cellular Component: plasma membrane (GO:0005886);; Biological Process: phospholipid catabolic process (GO:0009395);; Biological Process: phosphatidylcholine metabolic process (GO:0046470);; Molecular Function: N-acylphosphatidylethanolamine-specific phospholipase D activity (GO:00702…	K01115|0.0e+00|gmx:100794115|K01115 phospholipase D1/2 [EC:3.1.4.4] | (RefSeq) phospholipase D alpha 1	Glycerophospholipid metabolism (ko00564);; Ether lipid metabolism (ko00565);; Endocytosis (ko04144)	[I]	Lipid transport and metabolism	Phospholipase D C terminal	Phospholipase D alpha 1 OS=Vigna unguiculata OX=3917 GN=PLD1 PE=2 SV=1	I	Lipid transport and metabolism	phospholipase D alpha 1 [Glycine max]	molecular function: catalytic activity (GO:0003824);; molecular function: binding (GO:0005488);; cellular component: cell (GO:0005623);; cellular component: membrane (GO:0016020);; cellular component: cell part (GO:0044464);; biological process: metabolic process (GO:0008152);; biological process: cellular process (GO:0009987);; biological process: single-organism process (GO:0044699)
gene-LOC100803045	2.61468	3.03133	3.22558	0	0.053145	0	1.58e-10	-5.1179	down	--	--	Cellular Component: plasma membrane (GO:0005886);;	--	--	--	--	Protein of unknown function (DUF1645)	--	S	Function unknown	uncharacterized protein LOC100803045 [Glycine max]	cellular component: cell (GO:0005623);; cellular component: membrane (GO:0016020);; cellular component: cell part (GO:0044464)
gene-LOC100808948	39.8155	186.108	39.0609	0.299729	0.216466	0.49238	3.88e-25	-6.35029	down	[DPM]	Cell cycle control, cell division, chromosome partitioning;; Inorganic ion transport and metabolism;; Cell wall/membrane/envelope biogenesis	Molecular Function: ferroxidase activity (GO:0004322);; Molecular Function: copper ion binding (GO:0005507);; Cellular Component: plasma membrane (GO:0005886);; Biological Process: iron ion transport (GO:0006826);; Biological Process: lignin catabolic process (GO:0046274);; Cellular Component: apoplast (GO:0048046);; Molecular Function: hydroquinone:oxygen oxidoreductase activity (GO:0052716);; B…	K05909|0.0e+00|gmx:100808948|K05909 laccase [EC:1.10.3.2] | (RefSeq) laccase-12	--	[Q]	Secondary metabolites biosynthesis, transport and catabolism	Multicopper oxidase	Laccase-5 OS=Arabidopsis thaliana OX=3702 GN=LAC5 PE=2 SV=1	Q	Secondary metabolites biosynthesis, transport and catabolism	laccase-12 [Glycine max]	molecular function: catalytic activity (GO:0003824);; biological process: metabolic process (GO:0008152);; biological process: single-organism process (GO:0044699);; molecular function: binding (GO:0005488);; cellular component: cell (GO:0005623);; cellular component: membrane (GO:0016020);; cellular component: cell part (GO:0044464);; biological process: localization (GO:0051179);; biological pr…
gene-LOC100811504	1.911	0.897393	1.73197	0.169989	0.170622	0.169185	0.00168525	-1.58356	down	[T]	Signal transduction mechanisms	Molecular Function: protein serine/threonine kinase activity (GO:0004674);; Molecular Function: ATP binding (GO:0005524);; Cellular Component: plasma membrane (GO:0005886);; Biological Process: protein phosphorylation (GO:0006468);; Cellular Component: integral component of membrane (GO:0016021);;	K24104|2.9e-71|thj:104799061|K24104 GPN-loop GTPase | (RefSeq) LOW QUALITY PROTEIN: uncharacterized protein LOC104799061	--	--	--	Protein tyrosine and serine/threonine kinase	G-type lectin S-receptor-like serine/threonine-protein kinase CES101 OS=Arabidopsis thaliana OX=3702 GN=CES101 PE=2 SV=2	T	Signal transduction mechanisms	G-type lectin S-receptor-like serine/threonine-protein kinase CES101 isoform X1 [Glycine max]	molecular function: catalytic activity (GO:0003824);; biological process: metabolic process (GO:0008152);; biological process: cellular process (GO:0009987);; molecular function: binding (GO:0005488);; cellular component: cell (GO:0005623);; cellular component: membrane (GO:0016020);; cellular component: cell part (GO:0044464);; cellular component: membrane part (GO:0044425)
gene-LOC100803275	1.77365	1.45143	1.11959	0	0	0.011289	1.22e-10	-5.86002	down	[T]	Signal transduction mechanisms	Molecular Function: protein serine/threonine kinase activity (GO:0004674);; Molecular Function: ATP binding (GO:0005524);; Cellular Component: plasma membrane (GO:0005886);; Biological Process: protein phosphorylation (GO:0006468);; Cellular Component: integral component of membrane (GO:0016021);; Molecular Function: ubiquitin protein ligase binding (GO:0031625);; Biological Process: recognition …	K24104|9.0e-79|thj:104799061|K24104 GPN-loop GTPase | (RefSeq) LOW QUALITY PROTEIN: uncharacterized protein LOC104799061	--	--	--	Protein tyrosine and serine/threonine kinase	G-type lectin S-receptor-like serine/threonine-protein kinase At4g27290 OS=Arabidopsis thaliana OX=3702 GN=At4g27290 PE=3 SV=4	T	Signal transduction mechanisms	G-type lectin S-receptor-like serine/threonine-protein kinase At4g27290 [Glycine max]	molecular function: catalytic activity (GO:0003824);; biological process: metabolic process (GO:0008152);; biological process: cellular process (GO:0009987);; molecular function: binding (GO:0005488);; cellular component: cell (GO:0005623);; cellular component: membrane (GO:0016020);; cellular component: cell part (GO:0044464);; cellular component: membrane part (GO:0044425);; biological process:…
gene-LOC100808127	4.07506	5.1433	3.51266	0	0.085294	0.162445	1.43e-08	-3.94173	down	--	--	Cellular Component: early endosome (GO:0005769);; Cellular Component: plasma membrane (GO:0005886);; Molecular Function: magnesium ion transmembrane transporter activity (GO:0015095);; Biological Process: magnesium ion transport (GO:0015693);; Cellular Component: membrane (GO:0016020);; Cellular Component: integral component of membrane (GO:0016021);;	K22733|1.4e-196|gmx:100808127|K22733 magnesium transporter | (RefSeq) probable magnesium transporter NIPA6	--	[S]	Function unknown	Magnesium transporter NIPA	Probable magnesium transporter NIPA6 OS=Arabidopsis thaliana OX=3702 GN=At2g21120 PE=2 SV=1	P	Inorganic ion transport and metabolism	probable magnesium transporter NIPA6 [Glycine max]	cellular component: cell (GO:0005623);; cellular component: organelle (GO:0043226);; cellular component: cell part (GO:0044464);; cellular component: membrane (GO:0016020);; molecular function: transporter activity (GO:0005215);; biological process: localization (GO:0051179);; cellular component: membrane part (GO:0044425)
gene-LOC100811896	0.926392	1.43482	1.29434	0.047996	0	0.032009	2.82e-08	-3.838	down	[T]	Signal transduction mechanisms	Molecular Function: protein serine/threonine kinase activity (GO:0004674);; Molecular Function: ATP binding (GO:0005524);; Cellular Component: plasma membrane (GO:0005886);; Biological Process: protein phosphorylation (GO:0006468);; Cellular Component: integral component of membrane (GO:0016021);; Biological Process: recognition of pollen (GO:0048544);;	K24104|1.0e-72|thj:104799061|K24104 GPN-loop GTPase | (RefSeq) LOW QUALITY PROTEIN: uncharacterized protein LOC104799061	--	--	--	Protein tyrosine and serine/threonine kinase	G-type lectin S-receptor-like serine/threonine-protein kinase At1g11300 OS=Arabidopsis thaliana OX=3702 GN=At1g11300 PE=2 SV=1	T	Signal transduction mechanisms	G-type lectin S-receptor-like serine/threonine-protein kinase At1g11300 isoform X1 [Glycine max]	molecular function: catalytic activity (GO:0003824);; biological process: metabolic process (GO:0008152);; biological process: cellular process (GO:0009987);; molecular function: binding (GO:0005488);; cellular component: cell (GO:0005623);; cellular component: membrane (GO:0016020);; cellular component: cell part (GO:0044464);; cellular component: membrane part (GO:0044425);; biological process:…
gene-LOC100784391	2.03529	2.90575	1.90809	0.039501	0.03144	0.247032	2.95e-05	-2.83138	down	[E]	Amino acid transport and metabolism	Cellular Component: plasma membrane (GO:0005886);; Molecular Function: urea transmembrane transporter activity (GO:0015204);; Cellular Component: integral component of membrane (GO:0016021);; Biological Process: urea transmembrane transport (GO:0071918);;	K20989|0.0e+00|gmx:100784391|K20989 urea-proton symporter | (RefSeq) urea-proton symporter DUR3	--	[E]	Amino acid transport and metabolism	Sodium:solute symporter family	Urea-proton symporter DUR3 OS=Arabidopsis thaliana OX=3702 GN=DUR3 PE=1 SV=1	E	Amino acid transport and metabolism	urea-proton symporter DUR3 [Glycine max]	cellular component: cell (GO:0005623);; cellular component: membrane (GO:0016020);; cellular component: cell part (GO:0044464);; molecular function: transporter activity (GO:0005215);; biological process: localization (GO:0051179);; cellular component: membrane part (GO:0044425);; biological process: single-organism process (GO:0044699)
gene-LOC102670360	2.45948	1.26109	1.9614	1.72303	1.66033	1.38244	0.00385731	1.20462	up	--	--	Cellular Component: plasma membrane (GO:0005886);; Cellular Component: integral component of membrane (GO:0016021);;	--	--	--	--	--	--	S	Function unknown	NDR1/HIN1-like protein 13 [Glycine max]	cellular component: cell (GO:0005623);; cellular component: membrane (GO:0016020);; cellular component: cell part (GO:0044464);; cellular component: membrane part (GO:0044425)
gene-LOC100818052	10.5614	9.59871	10.6938	9.41308	11.0584	7.27073	1.98e-05	1.3434	up	--	--	Biological Process: immune system process (GO:0002376);; Molecular Function: molecular_function (GO:0003674);; Molecular Function: binding (GO:0005488);; Molecular Function: protein binding (GO:0005515);; Cellular Component: cellular_component (GO:0005575);; Cellular Component: intracellular (GO:0005622);; Cellular Component: cell (GO:0005623);; Cellular Component: cytoplasm (GO:0005737);; Cellul…	K11838|5.3e-24|ppp:112288942|K11838 ubiquitin carboxyl-terminal hydrolase 7 [EC:3.4.19.12] | (RefSeq) ubiquitin carboxyl-terminal hydrolase 12-like isoform X1	--	--	--	MATH domain	TNF receptor-associated factor homolog 1a OS=Arabidopsis thaliana OX=3702 GN=TRAF1A PE=1 SV=1	S	Function unknown	TNF receptor-associated factor homolog 1b isoform X1 [Glycine max]	biological process: immune system process (GO:0002376);; molecular function: binding (GO:0005488);; cellular component: cell (GO:0005623);; cellular component: cell part (GO:0044464);; cellular component: membrane (GO:0016020);; biological process: metabolic process (GO:0008152);; biological process: cellular process (GO:0009987);; biological process: response to stimulus (GO:0050896);; biologica…
gene-LOC100780446	0.59577	0.359123	0.492651	0.381786	0.407316	0.383938	0.00356835	1.16086	up	[M]	Cell wall/membrane/envelope biogenesis	Molecular Function: protein serine/threonine kinase activity (GO:0004674);; Molecular Function: ATP binding (GO:0005524);; Cellular Component: plasma membrane (GO:0005886);; Biological Process: hormone-mediated signaling pathway (GO:0009755);; Cellular Component: integral component of membrane (GO:0016021);;	K13415|2.4e-91|pda:103696970|K13415 protein brassinosteroid insensitive 1 [EC:2.7.10.1 2.7.11.1] | (RefSeq) brassinosteroid LRR receptor kinase BRI1-like	Plant hormone signal transduction (ko04075)	--	--	Leucine rich repeat	Leucine-rich repeat receptor protein kinase EMS1 OS=Arabidopsis thaliana OX=3702 GN=EMS1 PE=1 SV=1	T	Signal transduction mechanisms	leucine-rich repeat receptor protein kinase EMS1 [Glycine max]	molecular function: catalytic activity (GO:0003824);; biological process: metabolic process (GO:0008152);; biological process: cellular process (GO:0009987);; molecular function: binding (GO:0005488);; cellular component: cell (GO:0005623);; cellular component: membrane (GO:0016020);; cellular component: cell part (GO:0044464);; biological process: signaling (GO:0023052);; biological process: sin…
gene-LOC100816526	28.1641	42.3533	27.6089	1.06021	0.148075	2.59882	1.87e-06	-3.18783	down	--	--	Cellular Component: endoplasmic reticulum membrane (GO:0005789);; Cellular Component: plasma membrane (GO:0005886);; Cellular Component: integral component of membrane (GO:0016021);; Biological Process: endoplasmic reticulum-plasma membrane tethering (GO:0061817);; Biological Process: endoplasmic reticulum membrane organization (GO:0090158);;	K20222|3.9e-26|nsy:104217451|K20222 importin-5 | (RefSeq) importin-5-like isoform X1	--	[U]	Intracellular trafficking, secretion, and vesicular transport	MSP (Major sperm protein) domain	Vesicle-associated protein 1-2 OS=Arabidopsis thaliana OX=3702 GN=PVA12 PE=1 SV=1	U	Intracellular trafficking, secretion, and vesicular transport	uncharacterized protein LOC100816526 [Glycine max]	cellular component: cell (GO:0005623);; cellular component: membrane (GO:0016020);; cellular component: organelle (GO:0043226);; cellular component: organelle part (GO:0044422);; cellular component: membrane part (GO:0044425);; cellular component: cell part (GO:0044464);; biological process: cellular process (GO:0009987);; biological process: single-organism process (GO:0044699);; biological proc…
gene-LOC100789389	3.7875	2.50421	3.45438	0.096825	0.05241	0.045013	2.37e-21	-4.06519	down	[I]	Lipid transport and metabolism	Molecular Function: phospholipase D activity (GO:0004630);; Molecular Function: calcium ion binding (GO:0005509);; Cellular Component: plasma membrane (GO:0005886);; Biological Process: phospholipid catabolic process (GO:0009395);; Biological Process: phosphatidylcholine metabolic process (GO:0046470);; Molecular Function: N-acylphosphatidylethanolamine-specific phospholipase D activity (GO:00702…	K01115|0.0e+00|gmx:100789389|K01115 phospholipase D1/2 [EC:3.1.4.4] | (RefSeq) phospholipase D delta	Glycerophospholipid metabolism (ko00564);; Ether lipid metabolism (ko00565);; Endocytosis (ko04144)	[I]	Lipid transport and metabolism	Phospholipase D C terminal	Phospholipase D delta OS=Arabidopsis thaliana OX=3702 GN=PLDDELTA PE=1 SV=2	I	Lipid transport and metabolism	phospholipase D delta [Glycine max]	molecular function: catalytic activity (GO:0003824);; molecular function: binding (GO:0005488);; cellular component: cell (GO:0005623);; cellular component: membrane (GO:0016020);; cellular component: cell part (GO:0044464);; biological process: metabolic process (GO:0008152);; biological process: cellular process (GO:0009987);; biological process: single-organism process (GO:0044699)
gene-LOC100790546	0.704554	0.607828	0.819943	0.051404	0.0994	0.046145	0.00306997	-1.80381	down	[T]	Signal transduction mechanisms	Molecular Function: transmembrane receptor protein serine/threonine kinase activity (GO:0004675);; Molecular Function: ATP binding (GO:0005524);; Cellular Component: plasma membrane (GO:0005886);; Biological Process: protein phosphorylation (GO:0006468);; Cellular Component: integral component of membrane (GO:0016021);;	K13430|7.2e-91|ats:109759178|K13430 serine/threonine-protein kinase PBS1 [EC:2.7.11.1] | (RefSeq) LOC109759178; probable serine/threonine-protein kinase PBL7	Plant-pathogen interaction (ko04626)	[T]	Signal transduction mechanisms	Protein tyrosine and serine/threonine kinase	Receptor-like serine/threonine-protein kinase ALE2 OS=Arabidopsis thaliana OX=3702 GN=ALE2 PE=1 SV=1	T	Signal transduction mechanisms	receptor-like serine/threonine-protein kinase ALE2 isoform X1 [Glycine max]	molecular function: catalytic activity (GO:0003824);; molecular function: signal transducer activity (GO:0004871);; molecular function: molecular transducer activity (GO:0060089);; biological process: metabolic process (GO:0008152);; biological process: cellular process (GO:0009987);; biological process: signaling (GO:0023052);; biological process: single-organism process (GO:0044699);; biologica…
gene-LOC100815583	53.0571	82.2348	53.7353	11.7012	8.15404	10.1733	3.34e-05	-1.21436	down	[G]	Carbohydrate transport and metabolism	Cellular Component: plasma membrane (GO:0005886);; Molecular Function: water channel activity (GO:0015250);; Cellular Component: integral component of membrane (GO:0016021);;	K09872|7.7e-163|gmx:100815583|K09872 aquaporin PIP | (RefSeq) aquaporin PIP2-1	--	[G]	Carbohydrate transport and metabolism	Major intrinsic protein	Aquaporin PIP2-1 OS=Zea mays OX=4577 GN=PIP2-1 PE=1 SV=2	G	Carbohydrate transport and metabolism	aquaporin PIP2-1 [Glycine max]	cellular component: cell (GO:0005623);; cellular component: membrane (GO:0016020);; cellular component: cell part (GO:0044464);; molecular function: transporter activity (GO:0005215);; biological process: single-organism process (GO:0044699);; biological process: localization (GO:0051179);; cellular component: membrane part (GO:0044425)
gene-LOC100795809	50.7915	47.3742	50.8913	8.67319	9.57615	4.68433	0.00200483	-1.18027	down	[N]	Cell motility	Cellular Component: Golgi apparatus (GO:0005794);; Cellular Component: trans-Golgi network (GO:0005802);; Cellular Component: plasma membrane (GO:0005886);; Biological Process: plant-type primary cell wall biogenesis (GO:0009833);; Cellular Component: integral component of membrane (GO:0016021);; Molecular Function: cellulose synthase activity (GO:0016759);; Molecular Function: cellulose synthase…	K10999|0.0e+00|gmx:100795809|K10999 cellulose synthase A [EC:2.4.1.12] | (RefSeq) cellulose synthase A catalytic subunit 2 [UDP-forming]	--	--	--	Cellulose synthase	Cellulose synthase A catalytic subunit 2 [UDP-forming] OS=Arabidopsis thaliana OX=3702 GN=CESA2 PE=1 SV=1	G	Carbohydrate transport and metabolism	cellulose synthase A catalytic subunit 2 [UDP-forming] [Glycine max]	cellular component: cell (GO:0005623);; cellular component: organelle (GO:0043226);; cellular component: cell part (GO:0044464);; cellular component: organelle part (GO:0044422);; cellular component: membrane (GO:0016020);; biological process: cellular process (GO:0009987);; biological process: single-organism process (GO:0044699);; biological process: cellular component organization or biogenesi…
gene-LOC100818535	2.15821	2.11012	2.47143	0.15147	0.167281	0.021624	3.18e-05	-2.56047	down	--	--	Biological Process: amino acid transmembrane transport (GO:0003333);; Cellular Component: plasma membrane (GO:0005886);; Molecular Function: amino acid transmembrane transporter activity (GO:0015171);; Cellular Component: integral component of membrane (GO:0016021);;	K14209|2.4e-12|cmax:111478243|K14209 solute carrier family 36 (proton-coupled amino acid transporter) | (RefSeq) amino acid transporter ANT1 isoform X1	--	[E]	Amino acid transport and metabolism	Transmembrane amino acid transporter protein	Probable amino acid permease 7 OS=Arabidopsis thaliana OX=3702 GN=AAP7 PE=2 SV=1	E	Amino acid transport and metabolism	probable amino acid permease 7 [Glycine max]	biological process: single-organism process (GO:0044699);; biological process: localization (GO:0051179);; cellular component: cell (GO:0005623);; cellular component: membrane (GO:0016020);; cellular component: cell part (GO:0044464);; molecular function: transporter activity (GO:0005215);; cellular component: membrane part (GO:0044425)
gene-LOC100818352	3.85171	3.77524	3.72859	0.637065	0.503197	0.288204	0.000109424	-1.49575	down	[R]	General function prediction only	Molecular Function: protein serine/threonine kinase activity (GO:0004674);; Molecular Function: ATP binding (GO:0005524);; Cellular Component: nucleus (GO:0005634);; Cellular Component: cytoplasm (GO:0005737);; Cellular Component: plasma membrane (GO:0005886);; Biological Process: protein phosphorylation (GO:0006468);;	K08286|5.3e-307|egu:105053948|K08286 protein-serine/threonine kinase [EC:2.7.11.-] | (RefSeq) serine/threonine-protein kinase D6PKL1	--	[R]	General function prediction only	Protein kinase domain	Serine/threonine-protein kinase D6PKL2 OS=Arabidopsis thaliana OX=3702 GN=D6PKL2 PE=1 SV=1	T	Signal transduction mechanisms	serine/threonine-protein kinase D6PK [Glycine max]	molecular function: catalytic activity (GO:0003824);; biological process: metabolic process (GO:0008152);; biological process: cellular process (GO:0009987);; molecular function: binding (GO:0005488);; cellular component: cell (GO:0005623);; cellular component: organelle (GO:0043226);; cellular component: cell part (GO:0044464);; cellular component: membrane (GO:0016020)
gene-LOC100792940	11.6835	13.1327	12.7163	0.150509	0.129039	0.142249	4e-54	-4.95914	down	--	--	Cellular Component: plasma membrane (GO:0005886);; Molecular Function: peptide:proton symporter activity (GO:0015333);; Cellular Component: integral component of membrane (GO:0016021);; Molecular Function: oligopeptide transmembrane transporter activity (GO:0035673);; Molecular Function: peptide transmembrane transporter activity (GO:1904680);;	K14638|5.9e-293|pvu:PHAVU_005G169400g|K14638 solute carrier family 15 (peptide/histidine transporter), member 3/4 | (RefSeq) hypothetical protein	--	[E]	Amino acid transport and metabolism	POT family	Protein NRT1/ PTR FAMILY 1.2 OS=Arabidopsis thaliana OX=3702 GN=NPF1.2 PE=1 SV=1	E	Amino acid transport and metabolism	protein NRT1/ PTR FAMILY 1.2 [Glycine max]	cellular component: cell (GO:0005623);; cellular component: membrane (GO:0016020);; cellular component: cell part (GO:0044464);; molecular function: transporter activity (GO:0005215);; biological process: single-organism process (GO:0044699);; biological process: localization (GO:0051179);; cellular component: membrane part (GO:0044425)
gene-LOC100814137	11.1805	7.85943	11.0692	1.9366	0.967785	2.54776	0.00374024	-1.03048	down	--	--	Cellular Component: plasma membrane (GO:0005886);; Cellular Component: integral component of membrane (GO:0016021);; Molecular Function: transmembrane transporter activity (GO:0022857);;	K17500|4.5e-38|nto:104085001|K17500 integrin-linked kinase-associated serine/threonine phosphatase 2C [EC:3.1.3.16] | (RefSeq) WAT1-related protein At3g18200 isoform X1	--	--	--	EamA-like transporter family	WAT1-related protein At3g28050 OS=Arabidopsis thaliana OX=3702 GN=At3g28050 PE=2 SV=1	S	Function unknown	uncharacterized protein LOC100814137 [Glycine max]	cellular component: cell (GO:0005623);; cellular component: membrane (GO:0016020);; cellular component: cell part (GO:0044464);; cellular component: membrane part (GO:0044425);; molecular function: transporter activity (GO:0005215);; biological process: localization (GO:0051179)
gene-LOC100794756	2.46899	2.69178	2.60997	0.462007	0.223207	0.405763	0.000436716	-1.36835	down	--	--	Biological Process: reproduction (GO:0000003);; Biological Process: regulation of cell growth (GO:0001558);; Biological Process: regionalization (GO:0003002);; Biological Process: developmental process involved in reproduction (GO:0003006);; Molecular Function: molecular_function (GO:0003674);; Molecular Function: catalytic activity (GO:0003824);; Molecular Function: protein kinase activity (GO:0…	--	--	[R]	General function prediction only	Leucine rich repeat	--	S	Function unknown	LRR receptor-like serine/threonine-protein kinase ERL2 [Glycine max]	biological process: reproduction (GO:0000003);; biological process: biological regulation (GO:0065007);; biological process: multicellular organismal process (GO:0032501);; biological process: developmental process (GO:0032502);; biological process: single-organism process (GO:0044699);; biological process: reproductive process (GO:0022414);; molecular function: catalytic activity (GO:0003824);; …
gene-LOC100815005	5.12039	6.38804	5.86566	0.849916	1.16945	0.892651	0.00215443	-1.07554	down	[M]	Cell wall/membrane/envelope biogenesis	Molecular Function: transmembrane receptor protein serine/threonine kinase activity (GO:0004675);; Molecular Function: ATP binding (GO:0005524);; Cellular Component: plasma membrane (GO:0005886);; Biological Process: protein phosphorylation (GO:0006468);; Cellular Component: integral component of membrane (GO:0016021);;	K16224|2.2e-60|eus:EUTSA_v10023115mg|K16224 senescence-induced receptor-like serine/threonine-protein kinase | (RefSeq) hypothetical protein	MAPK signaling pathway - plant (ko04016);; Plant-pathogen interaction (ko04626)	--	--	Protein kinase domain	Probable LRR receptor-like serine/threonine-protein kinase At1g06840 OS=Arabidopsis thaliana OX=3702 GN=At1g06840 PE=1 SV=2	T	Signal transduction mechanisms	probable LRR receptor-like serine/threonine-protein kinase At1g06840 [Glycine max]	molecular function: catalytic activity (GO:0003824);; molecular function: signal transducer activity (GO:0004871);; molecular function: molecular transducer activity (GO:0060089);; biological process: metabolic process (GO:0008152);; biological process: cellular process (GO:0009987);; biological process: signaling (GO:0023052);; biological process: single-organism process (GO:0044699);; biologica…
gene-LOC100792803	0.79764	0.745623	0.977547	0.602967	0.509938	1.47373	0.00383727	1.43419	up	[T]	Signal transduction mechanisms	Molecular Function: protein serine/threonine kinase activity (GO:0004674);; Molecular Function: ATP binding (GO:0005524);; Cellular Component: plasma membrane (GO:0005886);; Biological Process: protein phosphorylation (GO:0006468);; Biological Process: cell surface receptor signaling pathway (GO:0007166);; Cellular Component: integral component of membrane (GO:0016021);;	K23544|2.5e-103|brp:103842861|K23544 serine incorporator 1/3 | (RefSeq) serine incorporator 3	--	--	--	Protein kinase domain	Wall-associated receptor kinase-like 2 OS=Arabidopsis thaliana OX=3702 GN=WAKL2 PE=2 SV=1	T	Signal transduction mechanisms	wall-associated receptor kinase-like 2 [Glycine max]	molecular function: catalytic activity (GO:0003824);; biological process: metabolic process (GO:0008152);; biological process: cellular process (GO:0009987);; molecular function: binding (GO:0005488);; cellular component: cell (GO:0005623);; cellular component: membrane (GO:0016020);; cellular component: cell part (GO:0044464);; biological process: signaling (GO:0023052);; biological process: sin…
gene-LOC102664169	0.3412	0.504437	0.42984	0.827312	1.05479	0.256821	0.00103027	2.17106	up	[O]	Posttranslational modification, protein turnover, chaperones	Molecular Function: ATP binding (GO:0005524);; Cellular Component: cytoplasm (GO:0005737);; Cellular Component: cytosol (GO:0005829);; Cellular Component: plasma membrane (GO:0005886);; Biological Process: protein folding (GO:0006457);; Cellular Component: cell surface (GO:0009986);; Cellular Component: macromolecular complex (GO:0032991);; Biological Process: cellular response to heat (GO:003460…	K04079|2.7e-191|gmx:102664169|K04079 molecular chaperone HtpG | (RefSeq) heat shock cognate protein 80	Protein processing in endoplasmic reticulum (ko04141);; Plant-pathogen interaction (ko04626)	[O]	Posttranslational modification, protein turnover, chaperones	Hsp90 protein	Heat shock cognate protein 80 OS=Solanum lycopersicum OX=4081 GN=HSC80 PE=2 SV=1	O	Posttranslational modification, protein turnover, chaperones	heat shock cognate protein 80 [Glycine max]	molecular function: binding (GO:0005488);; cellular component: cell (GO:0005623);; cellular component: cell part (GO:0044464);; cellular component: membrane (GO:0016020);; biological process: cellular process (GO:0009987);; cellular component: macromolecular complex (GO:0032991);; biological process: response to stimulus (GO:0050896);; biological process: biological regulation (GO:0065007)
gene-LOC100813332	0.580438	0.687592	0.474525	32.826	28.2703	23.9549	5.05e-130	6.98022	up	[P]	Inorganic ion transport and metabolism	Cellular Component: vacuolar membrane (GO:0005774);; Cellular Component: plasma membrane (GO:0005886);; Biological Process: response to salt stress (GO:0009651);; Molecular Function: sodium:proton antiporter activity (GO:0015385);; Molecular Function: potassium:proton antiporter activity (GO:0015386);; Cellular Component: integral component of membrane (GO:0016021);; Biological Process: regulatio…	K14724|6.7e-168|cpap:110821440|K14724 solute carrier family 9 (sodium/hydrogen exchanger), member 8 | (RefSeq) sodium/hydrogen exchanger 2-like	--	[P]	Inorganic ion transport and metabolism	Sodium/hydrogen exchanger family	Sodium/hydrogen exchanger 4 OS=Arabidopsis thaliana OX=3702 GN=NHX4 PE=2 SV=2	P	Inorganic ion transport and metabolism	sodium/hydrogen exchanger 4 isoform X1 [Glycine max]	cellular component: cell (GO:0005623);; cellular component: membrane (GO:0016020);; cellular component: organelle (GO:0043226);; cellular component: organelle part (GO:0044422);; cellular component: cell part (GO:0044464);; biological process: response to stimulus (GO:0050896);; molecular function: transporter activity (GO:0005215);; biological process: single-organism process (GO:0044699);; biol…
gene-LOC100809132	1.83843	1.2283	1.69075	1.48922	1.57879	0.886405	0.00343794	1.22177	up	[T]	Signal transduction mechanisms	Biological Process: mitotic cell cycle (GO:0000278);; Biological Process: mitotic cytokinesis (GO:0000281);; Biological Process: cell morphogenesis (GO:0000902);; Biological Process: cell morphogenesis involved in differentiation (GO:0000904);; Biological Process: cytokinesis (GO:0000910);; Biological Process: action potential (GO:0001508);; Biological Process: regulation of sodium ion transport …	--	--	[R]	General function prediction only	Ankyrin repeats (3 copies)	--	S	Function unknown	uncharacterized protein LOC100809132 isoform X1 [Glycine max]	biological process: cellular process (GO:0009987);; biological process: single-organism process (GO:0044699);; biological process: developmental process (GO:0032502);; biological process: cellular component organization or biogenesis (GO:0071840);; biological process: biological regulation (GO:0065007);; biological process: multicellular organismal process (GO:0032501);; molecular function: struc…
gene-LOC100782361	16.8409	9.34728	16.0236	2.28987	2.58723	2.14288	0.00139502	-1.08247	down	--	--	Cellular Component: cellular_component (GO:0005575);; Cellular Component: cell (GO:0005623);; Cellular Component: plasma membrane (GO:0005886);; Biological Process: response to stress (GO:0006950);; Biological Process: response to osmotic stress (GO:0006970);; Biological Process: biological_process (GO:0008150);; Biological Process: response to abiotic stimulus (GO:0009628);; Biological Process: …	--	--	--	--	Glycine-rich domain-containing protein-like	Glycine-rich domain-containing protein 1 OS=Arabidopsis thaliana OX=3702 GN=GRDP1 PE=2 SV=1	S	Function unknown	glycine-rich domain-containing protein 1 [Glycine max]	cellular component: cell (GO:0005623);; cellular component: membrane (GO:0016020);; cellular component: cell part (GO:0044464);; biological process: response to stimulus (GO:0050896);; biological process: biological regulation (GO:0065007);; biological process: cellular process (GO:0009987)
gene-LOC100813033	13.1097	13.7987	11.9319	1.26612	0.890099	1.28004	8.31e-15	-2.03915	down	--	--	Cellular Component: plasma membrane (GO:0005886);; Cellular Component: integral component of membrane (GO:0016021);; Molecular Function: 4 iron, 4 sulfur cluster binding (GO:0051539);;	--	--	--	--	Domain of unknown function (DUF588)	CASP-like protein 4C1 OS=Ricinus communis OX=3988 GN=RCOM_0464280 PE=2 SV=1	S	Function unknown	CASP-like protein 4C1 [Glycine max]	cellular component: cell (GO:0005623);; cellular component: membrane (GO:0016020);; cellular component: cell part (GO:0044464);; cellular component: membrane part (GO:0044425);; molecular function: binding (GO:0005488)
gene-LOC100799382	2.6935	6.9533	3.12036	0.063235	0.093603	0.046613	4.95e-12	-4.22545	down	[T]	Signal transduction mechanisms	Molecular Function: transmembrane receptor protein serine/threonine kinase activity (GO:0004675);; Molecular Function: ATP binding (GO:0005524);; Cellular Component: plasma membrane (GO:0005886);; Biological Process: protein phosphorylation (GO:0006468);;	K13430|1.9e-44|mesc:110626995|K13430 serine/threonine-protein kinase PBS1 [EC:2.7.11.1] | (RefSeq) probable serine/threonine-protein kinase PBL7	Plant-pathogen interaction (ko04626)	[T]	Signal transduction mechanisms	Protein tyrosine and serine/threonine kinase	Serine/threonine-protein kinase-like protein At1g28390 OS=Arabidopsis thaliana OX=3702 GN=At1g28390 PE=2 SV=1	T	Signal transduction mechanisms	serine/threonine-protein kinase-like protein At1g28390 [Glycine max]	molecular function: catalytic activity (GO:0003824);; molecular function: signal transducer activity (GO:0004871);; molecular function: molecular transducer activity (GO:0060089);; biological process: metabolic process (GO:0008152);; biological process: cellular process (GO:0009987);; biological process: signaling (GO:0023052);; biological process: single-organism process (GO:0044699);; biologica…
gene-GMPIN9D	3.5774	1.87558	2.9497	5.47794	4.38523	7.26223	4.76e-15	2.45309	up	--	--	Cellular Component: endoplasmic reticulum (GO:0005783);; Cellular Component: plasma membrane (GO:0005886);; Biological Process: auxin-activated signaling pathway (GO:0009734);; Biological Process: auxin polar transport (GO:0009926);; Biological Process: auxin homeostasis (GO:0010252);; Biological Process: auxin efflux (GO:0010315);; Molecular Function: auxin efflux transmembrane transporter activ…	K13947|7.1e-273|gmx:100781239|K13947 auxin efflux carrier family protein | (RefSeq) GMPIN9D; PIN auxin efflux transporter family protein	--	--	--	Membrane transport protein	Auxin efflux carrier component 2 OS=Arabidopsis thaliana OX=3702 GN=PIN2 PE=1 SV=2	P	Inorganic ion transport and metabolism	auxin efflux carrier component [Glycine max]	cellular component: cell (GO:0005623);; cellular component: organelle (GO:0043226);; cellular component: cell part (GO:0044464);; cellular component: membrane (GO:0016020);; biological process: cellular process (GO:0009987);; biological process: signaling (GO:0023052);; biological process: single-organism process (GO:0044699);; biological process: response to stimulus (GO:0050896);; biological pr…
gene-LOC100781996	116.033	195.049	134.318	5.03214	6.44591	13.283	6.78e-11	-2.68876	down	[N]	Cell motility	Cellular Component: Golgi apparatus (GO:0005794);; Cellular Component: trans-Golgi network (GO:0005802);; Cellular Component: plasma membrane (GO:0005886);; Biological Process: plant-type primary cell wall biogenesis (GO:0009833);; Cellular Component: integral component of membrane (GO:0016021);; Molecular Function: cellulose synthase activity (GO:0016759);; Molecular Function: cellulose synthase…	K10999|0.0e+00|gmx:100781996|K10999 cellulose synthase A [EC:2.4.1.12] | (RefSeq) cellulose synthase A catalytic subunit 4 [UDP-forming]	--	--	--	Cellulose synthase	Cellulose synthase A catalytic subunit 4 [UDP-forming] OS=Arabidopsis thaliana OX=3702 GN=CESA4 PE=1 SV=1	G	Carbohydrate transport and metabolism	cellulose synthase A catalytic subunit 4 [UDP-forming] [Glycine max]	cellular component: cell (GO:0005623);; cellular component: organelle (GO:0043226);; cellular component: cell part (GO:0044464);; cellular component: organelle part (GO:0044422);; cellular component: membrane (GO:0016020);; biological process: cellular process (GO:0009987);; biological process: single-organism process (GO:0044699);; biological process: cellular component organization or biogenesi…
gene-LOC100788740	6.41101	4.74409	5.62222	4.53723	5.3606	3.38385	0.000715941	1.14985	up	[P]	Inorganic ion transport and metabolism	Molecular Function: magnesium ion binding (GO:0000287);; Molecular Function: ATP binding (GO:0005524);; Cellular Component: plasma membrane (GO:0005886);; Cellular Component: integral component of membrane (GO:0016021);; Biological Process: phospholipid translocation (GO:0045332);;	K14802|0.0e+00|gmx:100788740|K14802 phospholipid-transporting ATPase [EC:7.6.2.1] | (RefSeq) phospholipid-transporting ATPase 1 isoform X1	--	[R]	General function prediction only	Phospholipid-translocating P-type ATPase C-terminal	Phospholipid-transporting ATPase 1 OS=Arabidopsis thaliana OX=3702 GN=ALA1 PE=2 SV=1	P	Inorganic ion transport and metabolism	phospholipid-transporting ATPase 1 isoform X1 [Glycine max]	molecular function: binding (GO:0005488);; cellular component: cell (GO:0005623);; cellular component: membrane (GO:0016020);; cellular component: cell part (GO:0044464);; cellular component: membrane part (GO:0044425);; biological process: cellular process (GO:0009987);; biological process: single-organism process (GO:0044699);; biological process: localization (GO:0051179);; biological process:…
gene-LOC100795006	5.88695	5.66959	6.13565	0	0.034752	0	1.02e-25	-7.10958	down	[NW]	Cell motility;; Extracellular structures	Molecular Function: protein serine/threonine kinase activity (GO:0004674);; Molecular Function: ATP binding (GO:0005524);; Cellular Component: plasma membrane (GO:0005886);; Biological Process: protein phosphorylation (GO:0006468);; Cellular Component: integral component of membrane (GO:0016021);; Biological Process: recognition of pollen (GO:0048544);;	K24104|1.1e-73|thj:104799061|K24104 GPN-loop GTPase | (RefSeq) LOW QUALITY PROTEIN: uncharacterized protein LOC104799061	--	--	--	Protein tyrosine and serine/threonine kinase	G-type lectin S-receptor-like serine/threonine-protein kinase At4g27290 OS=Arabidopsis thaliana OX=3702 GN=At4g27290 PE=3 SV=4	T	Signal transduction mechanisms	G-type lectin S-receptor-like serine/threonine-protein kinase At4g27290 isoform X1 [Glycine max]	molecular function: catalytic activity (GO:0003824);; biological process: metabolic process (GO:0008152);; biological process: cellular process (GO:0009987);; molecular function: binding (GO:0005488);; cellular component: cell (GO:0005623);; cellular component: membrane (GO:0016020);; cellular component: cell part (GO:0044464);; cellular component: membrane part (GO:0044425);; biological process:…
gene-LOC100793445	6.31979	7.03561	6.48299	0.467631	0.184559	0.844081	3.95e-07	-2.26778	down	--	--	Cellular Component: early endosome (GO:0005769);; Cellular Component: plasma membrane (GO:0005886);; Molecular Function: magnesium ion transmembrane transporter activity (GO:0015095);; Cellular Component: integral component of membrane (GO:0016021);;	K22733|5.9e-125|gmx:100793445|K22733 magnesium transporter | (RefSeq) probable magnesium transporter NIPA6 isoform X1	--	[S]	Function unknown	Magnesium transporter NIPA	Probable magnesium transporter NIPA3 OS=Arabidopsis thaliana OX=3702 GN=At1g34470 PE=2 SV=1	P	Inorganic ion transport and metabolism	probable magnesium transporter NIPA3 isoform X3 [Glycine max]	cellular component: cell (GO:0005623);; cellular component: organelle (GO:0043226);; cellular component: cell part (GO:0044464);; cellular component: membrane (GO:0016020);; molecular function: transporter activity (GO:0005215);; biological process: localization (GO:0051179);; cellular component: membrane part (GO:0044425)
gene-LOC100794120	8.81852	7.5844	7.47173	11.5259	6.40854	7.08234	3.11e-08	1.49013	up	--	--	Cellular Component: endoplasmic reticulum membrane (GO:0005789);; Cellular Component: plasma membrane (GO:0005886);; Biological Process: endoplasmic reticulum-plasma membrane tethering (GO:0061817);; Biological Process: endoplasmic reticulum membrane organization (GO:0090158);;	--	--	[U]	Intracellular trafficking, secretion, and vesicular transport	MSP (Major sperm protein) domain	Vesicle-associated protein 4-2 OS=Arabidopsis thaliana OX=3702 GN=PVA42 PE=1 SV=1	U	Intracellular trafficking, secretion, and vesicular transport	vesicle-associated protein 4-2-like [Glycine max]	cellular component: cell (GO:0005623);; cellular component: membrane (GO:0016020);; cellular component: organelle (GO:0043226);; cellular component: organelle part (GO:0044422);; cellular component: membrane part (GO:0044425);; cellular component: cell part (GO:0044464);; biological process: cellular process (GO:0009987);; biological process: single-organism process (GO:0044699);; biological proc…
gene-LOC100808835	14.5301	15.2638	16.5323	10.8648	12.7541	11.132	0.000117427	1.06122	up	--	--	Cellular Component: endoplasmic reticulum membrane (GO:0005789);; Cellular Component: plasma membrane (GO:0005886);; Biological Process: endoplasmic reticulum-plasma membrane tethering (GO:0061817);; Biological Process: endoplasmic reticulum membrane organization (GO:0090158);;	--	--	[U]	Intracellular trafficking, secretion, and vesicular transport	MSP (Major sperm protein) domain	Vesicle-associated protein 4-2 OS=Arabidopsis thaliana OX=3702 GN=PVA42 PE=1 SV=1	U	Intracellular trafficking, secretion, and vesicular transport	vesicle-associated protein 4-2 [Glycine max]	cellular component: cell (GO:0005623);; cellular component: membrane (GO:0016020);; cellular component: organelle (GO:0043226);; cellular component: organelle part (GO:0044422);; cellular component: membrane part (GO:0044425);; cellular component: cell part (GO:0044464);; biological process: cellular process (GO:0009987);; biological process: single-organism process (GO:0044699);; biological proc…
gene-LOC100806048	0.822911	0.421574	0.709736	0.034749	0	0.039519	0.000226198	-2.91531	down	[T]	Signal transduction mechanisms	Molecular Function: protein serine/threonine kinase activity (GO:0004674);; Molecular Function: ATP binding (GO:0005524);; Cellular Component: plasma membrane (GO:0005886);; Biological Process: protein phosphorylation (GO:0006468);; Cellular Component: integral component of membrane (GO:0016021);; Biological Process: defense response to bacterium (GO:0042742);;	K24104|3.5e-76|thj:104799061|K24104 GPN-loop GTPase | (RefSeq) LOW QUALITY PROTEIN: uncharacterized protein LOC104799061	--	--	--	Salt stress response/antifungal	Cysteine-rich receptor-like protein kinase 8 OS=Arabidopsis thaliana OX=3702 GN=CRK8 PE=3 SV=2	--	--	cysteine-rich receptor-like protein kinase 7 isoform X1 [Glycine max]	molecular function: catalytic activity (GO:0003824);; biological process: metabolic process (GO:0008152);; biological process: cellular process (GO:0009987);; molecular function: binding (GO:0005488);; cellular component: cell (GO:0005623);; cellular component: membrane (GO:0016020);; cellular component: cell part (GO:0044464);; cellular component: membrane part (GO:0044425);; biological process:…
gene-LOC100784207	43.4687	77.8026	50.4145	1.83329	1.68395	4.29984	5.47e-13	-2.99069	down	[N]	Cell motility	Cellular Component: Golgi apparatus (GO:0005794);; Cellular Component: trans-Golgi network (GO:0005802);; Cellular Component: plasma membrane (GO:0005886);; Biological Process: plant-type primary cell wall biogenesis (GO:0009833);; Cellular Component: integral component of membrane (GO:0016021);; Molecular Function: cellulose synthase activity (GO:0016759);; Molecular Function: cellulose synthase…	K10999|0.0e+00|gmx:100784207|K10999 cellulose synthase A [EC:2.4.1.12] | (RefSeq) cellulose synthase A catalytic subunit 8 [UDP-forming]	--	--	--	Cellulose synthase	Cellulose synthase A catalytic subunit 8 [UDP-forming] OS=Arabidopsis thaliana OX=3702 GN=CESA8 PE=1 SV=1	G	Carbohydrate transport and metabolism	cellulose synthase A catalytic subunit 8 [UDP-forming] [Glycine max]	cellular component: cell (GO:0005623);; cellular component: organelle (GO:0043226);; cellular component: cell part (GO:0044464);; cellular component: organelle part (GO:0044422);; cellular component: membrane (GO:0016020);; biological process: cellular process (GO:0009987);; biological process: single-organism process (GO:0044699);; biological process: cellular component organization or biogenesi…
gene-LOC100775285	21.4976	36.4467	23.5424	0.488622	0.398079	0.290932	9.53e-36	-4.58424	down	[DPM]	Cell cycle control, cell division, chromosome partitioning;; Inorganic ion transport and metabolism;; Cell wall/membrane/envelope biogenesis	Molecular Function: ferroxidase activity (GO:0004322);; Molecular Function: copper ion binding (GO:0005507);; Cellular Component: plasma membrane (GO:0005886);; Biological Process: iron ion transport (GO:0006826);; Biological Process: iron ion homeostasis (GO:0055072);;	K19791|2.4e-197|oeu:111379234|K19791 iron transport multicopper oxidase | (RefSeq) L-ascorbate oxidase homolog	--	[Q]	Secondary metabolites biosynthesis, transport and catabolism	Multicopper oxidase	L-ascorbate oxidase homolog OS=Brassica napus OX=3708 GN=Bp10 PE=2 SV=1	Q	Secondary metabolites biosynthesis, transport and catabolism	L-ascorbate oxidase homolog [Glycine max]	molecular function: catalytic activity (GO:0003824);; biological process: metabolic process (GO:0008152);; biological process: single-organism process (GO:0044699);; molecular function: binding (GO:0005488);; cellular component: cell (GO:0005623);; cellular component: membrane (GO:0016020);; cellular component: cell part (GO:0044464);; biological process: localization (GO:0051179);; biological pr…
gene-LOC100777050	4.66235	2.78634	6.07543	0	0	0	2.99e-11	-7.76107	down	--	--	Cellular Component: plasma membrane (GO:0005886);; Cellular Component: integral component of membrane (GO:0016021);; Molecular Function: transmembrane transporter activity (GO:0022857);;	K17500|3.0e-53|nto:104085001|K17500 integrin-linked kinase-associated serine/threonine phosphatase 2C [EC:3.1.3.16] | (RefSeq) WAT1-related protein At3g18200 isoform X1	--	--	--	EamA-like transporter family	WAT1-related protein At2g37460 OS=Arabidopsis thaliana OX=3702 GN=At2g37460 PE=2 SV=1	S	Function unknown	WAT1-related protein At2g37460 [Glycine max]	cellular component: cell (GO:0005623);; cellular component: membrane (GO:0016020);; cellular component: cell part (GO:0044464);; cellular component: membrane part (GO:0044425);; molecular function: transporter activity (GO:0005215);; biological process: localization (GO:0051179)
gene-LOC100775930	1.68098	1.16675	2.13877	1.97969	1.58951	1.13463	0.000622308	1.3707	up	[R]	General function prediction only	Molecular Function: transmembrane receptor protein serine/threonine kinase activity (GO:0004675);; Molecular Function: ATP binding (GO:0005524);; Cellular Component: plasma membrane (GO:0005886);; Biological Process: protein phosphorylation (GO:0006468);;	K01534|1.0e-84|var:108330779|K01534 Zn2+/Cd2+-exporting ATPase [EC:7.2.2.12 7.2.2.21] | (RefSeq) cadmium/zinc-transporting ATPase HMA3-like	--	[T]	Signal transduction mechanisms	Protein kinase domain	Receptor-like cytosolic serine/threonine-protein kinase RBK1 OS=Arabidopsis thaliana OX=3702 GN=RBK1 PE=1 SV=1	T	Signal transduction mechanisms	receptor-like cytosolic serine/threonine-protein kinase RBK1 [Glycine max]	molecular function: catalytic activity (GO:0003824);; molecular function: signal transducer activity (GO:0004871);; molecular function: molecular transducer activity (GO:0060089);; biological process: metabolic process (GO:0008152);; biological process: cellular process (GO:0009987);; biological process: signaling (GO:0023052);; biological process: single-organism process (GO:0044699);; biologica…
gene-LOC100810191	2.80201	2.7187	2.34764	0.05821	0	0.115972	1.42e-10	-3.89686	down	[S]	Function unknown	Cellular Component: plasma membrane (GO:0005886);; Biological Process: response to iron ion (GO:0010039);; Cellular Component: membrane (GO:0016020);; Cellular Component: integral component of membrane (GO:0016021);; Biological Process: seed development (GO:0048316);; Molecular Function: iron-nicotianamine transmembrane transporter activity (GO:0051980);;	K15363|9.1e-51|bna:111210893|K15363 fanconi-associated nuclease 1 [EC:3.1.21.- 3.1.4.1] | (RefSeq) fanconi-associated nuclease 1 homolog	--	--	--	OPT oligopeptide transporter protein	Metal-nicotianamine transporter YSL1 OS=Arabidopsis thaliana OX=3702 GN=YSL1 PE=2 SV=2	S	Function unknown	metal-nicotianamine transporter YSL1 [Glycine max]	cellular component: cell (GO:0005623);; cellular component: membrane (GO:0016020);; cellular component: cell part (GO:0044464);; biological process: response to stimulus (GO:0050896);; cellular component: membrane part (GO:0044425);; biological process: reproduction (GO:0000003);; biological process: reproductive process (GO:0022414);; biological process: multicellular organismal process (GO:0032…
gene-LOC100787187	7.16559	11.6827	8.26223	0	0	0	8.94e-12	-7.89346	down	--	--	Biological Process: reproduction (GO:0000003);; Biological Process: cell morphogenesis (GO:0000902);; Biological Process: cell morphogenesis involved in differentiation (GO:0000904);; Biological Process: developmental process involved in reproduction (GO:0003006);; Cellular Component: cellular_component (GO:0005575);; Cellular Component: cell (GO:0005623);; Cellular Component: plasma membrane (GO…	K23541|5.8e-23|egu:105051209|K23541 Ca2+/H+ antiporter, TMEM165/GDT1 family | (RefSeq) LOW QUALITY PROTEIN: uncharacterized protein LOC105051209	--	--	--	P21-Rho-binding domain	CRIB domain-containing protein RIC4 OS=Arabidopsis thaliana OX=3702 GN=RIC4 PE=1 SV=1	S	Function unknown	CRIB domain-containing protein RIC4 [Glycine max]	biological process: reproduction (GO:0000003);; biological process: cellular process (GO:0009987);; biological process: developmental process (GO:0032502);; biological process: single-organism process (GO:0044699);; biological process: cellular component organization or biogenesis (GO:0071840);; biological process: reproductive process (GO:0022414);; cellular component: cell (GO:0005623);; cellul…
gene-LOC100305594	37.595	16.7438	38.7844	216.71	95.137	210.229	4.6e-26	3.85204	up	[T]	Signal transduction mechanisms	Molecular Function: nucleotide binding (GO:0000166);; Molecular Function: molecular_function (GO:0003674);; Molecular Function: binding (GO:0005488);; Cellular Component: cellular_component (GO:0005575);; Cellular Component: cell (GO:0005623);; Cellular Component: plasma membrane (GO:0005886);; Molecular Function: drug binding (GO:0008144);; Cellular Component: membrane (GO:0016020);; Molecular F…	K06674|4.0e-07|vcn:VOLCADRAFT_106052|K06674 structural maintenance of chromosome 2 | (RefSeq) hypothetical protein	--	--	--	Universal stress protein family	--	T	Signal transduction mechanisms	USP domain-containing protein [Glycine max]	molecular function: binding (GO:0005488);; cellular component: cell (GO:0005623);; cellular component: membrane (GO:0016020);; cellular component: cell part (GO:0044464)
gene-LOC100787366	0.157226	0	0	27.7378	15.0689	28.2217	1.76e-07	7.10099	up	[P]	Inorganic ion transport and metabolism	Molecular Function: manganese ion transmembrane transporter activity (GO:0005384);; Cellular Component: plasma membrane (GO:0005886);; Biological Process: cellular cadmium ion homeostasis (GO:0006876);; Biological Process: cellular iron ion homeostasis (GO:0006879);; Biological Process: cellular zinc ion homeostasis (GO:0006882);; Molecular Function: cation transmembrane transporter activity (GO:…	--	--	[P]	Inorganic ion transport and metabolism	Cation efflux family	Metal tolerance protein 4 OS=Oryza sativa subsp. japonica OX=39947 GN=MTP4 PE=2 SV=1	P	Inorganic ion transport and metabolism	metal tolerance protein 4 isoform X1 [Glycine max]	molecular function: transporter activity (GO:0005215);; biological process: localization (GO:0051179);; cellular component: cell (GO:0005623);; cellular component: membrane (GO:0016020);; cellular component: cell part (GO:0044464);; biological process: cellular process (GO:0009987);; biological process: single-organism process (GO:0044699);; biological process: biological regulation (GO:0065007);…
gene-LOC100784641	5.9846	4.9689	5.02813	0.814606	0.226534	0.585061	7.03e-06	-1.82873	down	--	--	Cellular Component: plasma membrane (GO:0005886);;	K19366|5.7e-55|mcha:111015503|K19366 spartin | (RefSeq) protein EARLY-RESPONSIVE TO DEHYDRATION 7, chloroplastic-like	Endocytosis (ko04144)	--	--	Senescence-associated protein	Senescence/dehydration-associated protein At3g51250 OS=Arabidopsis thaliana OX=3702 GN=At3g51250 PE=2 SV=1	S	Function unknown	senescence/dehydration-associated protein At4g35985, chloroplastic [Glycine max]	cellular component: cell (GO:0005623);; cellular component: membrane (GO:0016020);; cellular component: cell part (GO:0044464)
gene-LOC100798809	1.96318	0.846209	1.75824	0	0	0	1.37e-09	-7.28506	down	[O]	Posttranslational modification, protein turnover, chaperones	Molecular Function: transmembrane receptor protein serine/threonine kinase activity (GO:0004675);; Molecular Function: ATP binding (GO:0005524);; Cellular Component: plasma membrane (GO:0005886);; Biological Process: protein phosphorylation (GO:0006468);; Cellular Component: integral component of membrane (GO:0016021);;	K13430|1.6e-58|vvi:100259977|K13430 serine/threonine-protein kinase PBS1 [EC:2.7.11.1] | (RefSeq) serine/threonine-protein kinase CDL1	Plant-pathogen interaction (ko04626)	--	--	Protein kinase domain	Probable LRR receptor-like serine/threonine-protein kinase At1g06840 OS=Arabidopsis thaliana OX=3702 GN=At1g06840 PE=1 SV=2	T	Signal transduction mechanisms	probable LRR receptor-like serine/threonine-protein kinase At1g06840 [Glycine max]	molecular function: catalytic activity (GO:0003824);; molecular function: signal transducer activity (GO:0004871);; molecular function: molecular transducer activity (GO:0060089);; biological process: metabolic process (GO:0008152);; biological process: cellular process (GO:0009987);; biological process: signaling (GO:0023052);; biological process: single-organism process (GO:0044699);; biologica…
gene-LOC100789882	8.94378	5.4839	9.44849	38.2466	41.0727	33.4501	7.76e-36	3.65737	up	--	--	Cellular Component: plasma membrane (GO:0005886);; Cellular Component: integral component of membrane (GO:0016021);; Biological Process: transmembrane transport (GO:0055085);;	K22048|0.0e+00|gmx:100789882|K22048 mechanosensitive ion channel protein 4/5/6/7/8/9/10 | (RefSeq) mechanosensitive ion channel protein 6 isoform X1	--	[M]	Cell wall/membrane/envelope biogenesis	Mechanosensitive ion channel	Mechanosensitive ion channel protein 6 OS=Arabidopsis thaliana OX=3702 GN=MSL6 PE=1 SV=1	M	Cell wall/membrane/envelope biogenesis	mechanosensitive ion channel protein 6 isoform X2 [Glycine max]	cellular component: cell (GO:0005623);; cellular component: membrane (GO:0016020);; cellular component: cell part (GO:0044464);; cellular component: membrane part (GO:0044425);; biological process: localization (GO:0051179)
gene-LOC100791642	8.51689	6.02431	9.45062	0.01574	0	0.048361	5.69e-31	-6.61325	down	[W]	Extracellular structures	Molecular Function: protein serine/threonine kinase activity (GO:0004674);; Molecular Function: ATP binding (GO:0005524);; Cellular Component: plasma membrane (GO:0005886);; Biological Process: protein phosphorylation (GO:0006468);; Cellular Component: integral component of membrane (GO:0016021);; Biological Process: defense response to bacterium (GO:0042742);;	K24104|9.7e-85|thj:104799061|K24104 GPN-loop GTPase | (RefSeq) LOW QUALITY PROTEIN: uncharacterized protein LOC104799061	--	--	--	Protein tyrosine and serine/threonine kinase	Cysteine-rich receptor-like protein kinase 25 OS=Arabidopsis thaliana OX=3702 GN=CRK25 PE=3 SV=1	T	Signal transduction mechanisms	cysteine-rich receptor-like protein kinase 10 [Glycine max]	molecular function: catalytic activity (GO:0003824);; biological process: metabolic process (GO:0008152);; biological process: cellular process (GO:0009987);; molecular function: binding (GO:0005488);; cellular component: cell (GO:0005623);; cellular component: membrane (GO:0016020);; cellular component: cell part (GO:0044464);; cellular component: membrane part (GO:0044425);; biological process:…
gene-LOC100777573	0.775597	0.13587	0.526976	0.843244	0.346546	0.599129	0.00398787	1.80801	up	--		Molecular Function: transmembrane receptor protein serine/threonine kinase activity (GO:0004675);; Molecular Function: ATP binding (GO:0005524);; Cellular Component: plasma membrane (GO:0005886);; Biological Process: protein phosphorylation (GO:0006468);;	K13418|3.9e-34|gmx:100305377|K13418 somatic embryogenesis receptor kinase 1 [EC:2.7.10.1 2.7.11.1] | (RefSeq) SERK1; somatic embryogenesis receptor kinase precursor	--	--	--	Protein kinase domain	Somatic embryogenesis receptor kinase 1 OS=Arabidopsis thaliana OX=3702 GN=SERK1 PE=1 SV=2	T	Signal transduction mechanisms	probable LRR receptor-like serine/threonine-protein kinase At2g23950 isoform X2 [Glycine max]	molecular function: catalytic activity (GO:0003824);; molecular function: signal transducer activity (GO:0004871);; molecular function: molecular transducer activity (GO:0060089);; biological process: metabolic process (GO:0008152);; biological process: cellular process (GO:0009987);; biological process: signaling (GO:0023052);; biological process: single-organism process (GO:0044699);; biologica…
gene-GMIQD15	4.9815	3.13091	4.02307	0.355515	0.261445	0.943425	0.00440828	-1.48653	down	--	--	Molecular Function: protein binding (GO:0005515);; Cellular Component: cellular_component (GO:0005575);; Cellular Component: intracellular (GO:0005622);; Cellular Component: cell (GO:0005623);; Cellular Component: cytoplasm (GO:0005737);; Cellular Component: cytosol (GO:0005829);; Cellular Component: cytoskeleton (GO:0005856);; Cellular Component: microtubule associated complex (GO:0005875);; Cel…	--	--	--	--	Protein of unknown function (DUF4005)	Protein IQ-DOMAIN 14 OS=Arabidopsis thaliana OX=3702 GN=IQD14 PE=1 SV=1	S	Function unknown	protein IQ-DOMAIN 14 [Glycine max]	molecular function: binding (GO:0005488);; cellular component: cell (GO:0005623);; cellular component: cell part (GO:0044464);; cellular component: organelle (GO:0043226);; cellular component: macromolecular complex (GO:0032991);; cellular component: organelle part (GO:0044422);; cellular component: membrane (GO:0016020)
gene-LOC100306617	3.93215	6.17947	4.02982	0	0	0	1.04e-08	-6.98737	down	--	--	Biological Process: reproduction (GO:0000003);; Biological Process: cell morphogenesis (GO:0000902);; Biological Process: cell morphogenesis involved in differentiation (GO:0000904);; Biological Process: developmental process involved in reproduction (GO:0003006);; Cellular Component: cellular_component (GO:0005575);; Cellular Component: cell (GO:0005623);; Cellular Component: plasma membrane (GO…	K23541|6.2e-22|egu:105051209|K23541 Ca2+/H+ antiporter, TMEM165/GDT1 family | (RefSeq) LOW QUALITY PROTEIN: uncharacterized protein LOC105051209	--	--	--	P21-Rho-binding domain	CRIB domain-containing protein RIC4 OS=Arabidopsis thaliana OX=3702 GN=RIC4 PE=1 SV=1	S	Function unknown	uncharacterized protein LOC100306617 [Glycine max]	biological process: reproduction (GO:0000003);; biological process: cellular process (GO:0009987);; biological process: developmental process (GO:0032502);; biological process: single-organism process (GO:0044699);; biological process: cellular component organization or biogenesis (GO:0071840);; biological process: reproductive process (GO:0022414);; cellular component: cell (GO:0005623);; cellul…
gene-LOC100799756	7.22259	7.42396	7.62232	1.35794	0.847144	1.71177	0.000189157	-1.03179	down	--	--	Cellular Component: early endosome (GO:0005769);; Cellular Component: plasma membrane (GO:0005886);; Molecular Function: magnesium ion transmembrane transporter activity (GO:0015095);; Cellular Component: integral component of membrane (GO:0016021);;	K22733|1.4e-187|gmx:100799756|K22733 magnesium transporter | (RefSeq) probable magnesium transporter NIPA7 isoform X1	--	[S]	Function unknown	Magnesium transporter NIPA	Probable magnesium transporter NIPA7 OS=Arabidopsis thaliana OX=3702 GN=At4g38730 PE=2 SV=1	P	Inorganic ion transport and metabolism	probable magnesium transporter NIPA7 isoform X1 [Glycine max]	cellular component: cell (GO:0005623);; cellular component: organelle (GO:0043226);; cellular component: cell part (GO:0044464);; cellular component: membrane (GO:0016020);; molecular function: transporter activity (GO:0005215);; biological process: localization (GO:0051179);; cellular component: membrane part (GO:0044425)
gene-LOC100798032	4.24573	1.43488	4.1082	0	0	0	2.05e-10	-7.56766	down	[T]	Signal transduction mechanisms	Molecular Function: transmembrane receptor protein serine/threonine kinase activity (GO:0004675);; Molecular Function: ATP binding (GO:0005524);; Cellular Component: plasma membrane (GO:0005886);; Biological Process: protein phosphorylation (GO:0006468);;	K13430|2.7e-139|zju:107417665|K13430 serine/threonine-protein kinase PBS1 [EC:2.7.11.1] | (RefSeq) serine/threonine-protein kinase PBS1	Plant-pathogen interaction (ko04626)	[T]	Signal transduction mechanisms	Protein kinase domain	Probable serine/threonine-protein kinase PBL23 OS=Arabidopsis thaliana OX=3702 GN=PBL23 PE=2 SV=1	T	Signal transduction mechanisms	probable serine/threonine-protein kinase PBL23 [Glycine max]	molecular function: catalytic activity (GO:0003824);; molecular function: signal transducer activity (GO:0004871);; molecular function: molecular transducer activity (GO:0060089);; biological process: metabolic process (GO:0008152);; biological process: cellular process (GO:0009987);; biological process: signaling (GO:0023052);; biological process: single-organism process (GO:0044699);; biologica…
gene-LOC100789665	0.578947	1.01431	0.511669	3.99973	5.92739	2.47356	4.4e-16	3.95982	up	[T]	Signal transduction mechanisms	Molecular Function: protein serine/threonine kinase activity (GO:0004674);; Molecular Function: ATP binding (GO:0005524);; Cellular Component: plasma membrane (GO:0005886);; Biological Process: hormone-mediated signaling pathway (GO:0009755);; Cellular Component: integral component of membrane (GO:0016021);;	K22911|3.4e-184|spen:107031166|K22911 thiamine phosphate phosphatase / amino-HMP aminohydrolase [EC:3.1.3.100 3.5.99.-] | (RefSeq) bifunctional TH2 protein, mitochondrial	Thiamine metabolism (ko00730)	--	--	Leucine rich repeat	MDIS1-interacting receptor like kinase 1 OS=Arabidopsis thaliana OX=3702 GN=MIK1 PE=1 SV=1	T	Signal transduction mechanisms	MDIS1-interacting receptor like kinase 1 [Glycine max]	molecular function: catalytic activity (GO:0003824);; biological process: metabolic process (GO:0008152);; biological process: cellular process (GO:0009987);; molecular function: binding (GO:0005488);; cellular component: cell (GO:0005623);; cellular component: membrane (GO:0016020);; cellular component: cell part (GO:0044464);; biological process: signaling (GO:0023052);; biological process: sin…
gene-LOC100798336	65.1413	81.2512	72.7931	3.5175	3.92189	4.39472	2.01e-26	-2.72562	down	--	--	Cellular Component: plasma membrane (GO:0005886);; Cellular Component: plasmodesma (GO:0009506);; Cellular Component: integral component of membrane (GO:0016021);;	K01184|2.4e-10|hbr:110656842|K01184 polygalacturonase [EC:3.2.1.15] | (RefSeq) polygalacturonase QRT2-like	Pentose and glucuronate interconversions (ko00040)	--	--	Tetraspanin family	Tetraspanin-3 OS=Arabidopsis thaliana OX=3702 GN=TET3 PE=1 SV=1	S	Function unknown	tetraspanin-3 [Glycine max]	cellular component: cell (GO:0005623);; cellular component: membrane (GO:0016020);; cellular component: cell part (GO:0044464);; cellular component: cell junction (GO:0030054);; cellular component: membrane part (GO:0044425)
gene-LOC100791688	1.2249	3.0141	1.65092	0	0.035964	0	5.75e-10	-5.36672	down	[I]	Lipid transport and metabolism	Molecular Function: phospholipase D activity (GO:0004630);; Molecular Function: calcium ion binding (GO:0005509);; Cellular Component: plasma membrane (GO:0005886);; Biological Process: phospholipid catabolic process (GO:0009395);; Biological Process: phosphatidylcholine metabolic process (GO:0046470);; Molecular Function: N-acylphosphatidylethanolamine-specific phospholipase D activity (GO:00702…	K01115|0.0e+00|gmx:100791688|K01115 phospholipase D1/2 [EC:3.1.4.4] | (RefSeq) phospholipase D alpha 1	Glycerophospholipid metabolism (ko00564);; Ether lipid metabolism (ko00565);; Endocytosis (ko04144)	[I]	Lipid transport and metabolism	Phospholipase D C terminal	Phospholipase D alpha 1 OS=Carica papaya OX=3649 GN=PLD1 PE=1 SV=1	I	Lipid transport and metabolism	phospholipase D alpha 1 [Glycine max]	molecular function: catalytic activity (GO:0003824);; molecular function: binding (GO:0005488);; cellular component: cell (GO:0005623);; cellular component: membrane (GO:0016020);; cellular component: cell part (GO:0044464);; biological process: metabolic process (GO:0008152);; biological process: cellular process (GO:0009987);; biological process: single-organism process (GO:0044699)
--	80.3167	53.6228	80.5397	162.536	180.987	123.452	5.18e-17	2.59765	up	--	--	Cellular Component: endoplasmic reticulum (GO:0005783);; Cellular Component: plasma membrane (GO:0005886);; Biological Process: regulation of proton transport (GO:0010155);; Cellular Component: integral component of membrane (GO:0016021);;	--	--	--	--	--	Proton pump-interactor 1 OS=Arabidopsis thaliana OX=3702 GN=PPI1 PE=1 SV=2	S	Function unknown	LOW QUALITY PROTEIN: hypothetical protein GLYMA_12G224800 [Glycine max]	cellular component: cell (GO:0005623);; cellular component: organelle (GO:0043226);; cellular component: cell part (GO:0044464);; cellular component: membrane (GO:0016020);; biological process: biological regulation (GO:0065007);; cellular component: membrane part (GO:0044425)
gene-GMIQD4	7.08814	6.59012	8.16987	1.06404	0.663178	0.212996	2.82e-06	-2.21134	down	--	--	Molecular Function: protein binding (GO:0005515);; Cellular Component: cellular_component (GO:0005575);; Cellular Component: intracellular (GO:0005622);; Cellular Component: cell (GO:0005623);; Cellular Component: cytoplasm (GO:0005737);; Cellular Component: cytosol (GO:0005829);; Cellular Component: cytoskeleton (GO:0005856);; Cellular Component: microtubule associated complex (GO:0005875);; Cel…	--	--	--	--	IQ calmodulin-binding motif	Protein IQ-DOMAIN 31 OS=Arabidopsis thaliana OX=3702 GN=IQD31 PE=1 SV=1	S	Function unknown	protein IQ-DOMAIN 4 [Glycine max]	molecular function: binding (GO:0005488);; cellular component: cell (GO:0005623);; cellular component: cell part (GO:0044464);; cellular component: organelle (GO:0043226);; cellular component: macromolecular complex (GO:0032991);; cellular component: organelle part (GO:0044422);; cellular component: membrane (GO:0016020)
gene-LOC100811147	0.831647	0.328187	1.03183	24.5985	10.9555	59.7379	1.06e-33	6.59188	up	--	--	Cellular Component: plasma membrane (GO:0005886);; Cellular Component: integral component of membrane (GO:0016021);; Molecular Function: transmembrane transporter activity (GO:0022857);;	K17500|2.2e-56|nto:104085001|K17500 integrin-linked kinase-associated serine/threonine phosphatase 2C [EC:3.1.3.16] | (RefSeq) WAT1-related protein At3g18200 isoform X1	--	--	--	EamA-like transporter family	WAT1-related protein At2g37460 OS=Arabidopsis thaliana OX=3702 GN=At2g37460 PE=2 SV=1	S	Function unknown	WAT1-related protein At2g37460 isoform X2 [Glycine max]	cellular component: cell (GO:0005623);; cellular component: membrane (GO:0016020);; cellular component: cell part (GO:0044464);; cellular component: membrane part (GO:0044425);; molecular function: transporter activity (GO:0005215);; biological process: localization (GO:0051179)
gene-LOC100804524	3.53494	1.96282	3.20809	12.0817	13.9613	8.26389	8.8e-22	3.45426	up	[T]	Signal transduction mechanisms	Molecular Function: protein serine/threonine kinase activity (GO:0004674);; Molecular Function: ATP binding (GO:0005524);; Cellular Component: nucleus (GO:0005634);; Cellular Component: cytoplasm (GO:0005737);; Cellular Component: plasma membrane (GO:0005886);; Biological Process: protein phosphorylation (GO:0006468);;	K20715|0.0e+00|gmx:100804524|K20715 phototropin [EC:2.7.11.1] | (RefSeq) phototropin-1	--	--	--	Protein kinase domain	Phototropin-1 OS=Arabidopsis thaliana OX=3702 GN=PHOT1 PE=1 SV=1	T	Signal transduction mechanisms	phototropin-1 [Glycine max]	molecular function: catalytic activity (GO:0003824);; biological process: metabolic process (GO:0008152);; biological process: cellular process (GO:0009987);; molecular function: binding (GO:0005488);; cellular component: cell (GO:0005623);; cellular component: organelle (GO:0043226);; cellular component: cell part (GO:0044464);; cellular component: membrane (GO:0016020)
gene-LOC100813521	5.8098	8.02986	6.85059	0.804758	0.295516	0.322608	6.07e-09	-2.40239	down	--	--	Cellular Component: plasma membrane (GO:0005886);; Biological Process: anion transport (GO:0006820);; Molecular Function: mechanically-gated ion channel activity (GO:0008381);; Cellular Component: integral component of membrane (GO:0016021);; Biological Process: detection of mechanical stimulus (GO:0050982);;	K22048|0.0e+00|gmx:100813521|K22048 mechanosensitive ion channel protein 4/5/6/7/8/9/10 | (RefSeq) mechanosensitive ion channel protein 10	--	[M]	Cell wall/membrane/envelope biogenesis	Mechanosensitive ion channel	Mechanosensitive ion channel protein 10 OS=Arabidopsis thaliana OX=3702 GN=MSL10 PE=1 SV=1	M	Cell wall/membrane/envelope biogenesis	mechanosensitive ion channel protein 10 [Glycine max]	cellular component: cell (GO:0005623);; cellular component: membrane (GO:0016020);; cellular component: cell part (GO:0044464);; biological process: localization (GO:0051179);; molecular function: transporter activity (GO:0005215);; cellular component: membrane part (GO:0044425);; biological process: response to stimulus (GO:0050896)
gene-LOC100798416	2.10951	4.58366	2.93721	0	0	0	2.86e-11	-7.78803	down	[P]	Inorganic ion transport and metabolism	Molecular Function: ferroxidase activity (GO:0004322);; Molecular Function: copper ion binding (GO:0005507);; Cellular Component: plasma membrane (GO:0005886);; Biological Process: iron ion transport (GO:0006826);; Cellular Component: integral component of membrane (GO:0016021);; Biological Process: lignin catabolic process (GO:0046274);; Cellular Component: apoplast (GO:0048046);; Molecular Func…	K05909|0.0e+00|gmx:100798416|K05909 laccase [EC:1.10.3.2] | (RefSeq) laccase-17	--	[Q]	Secondary metabolites biosynthesis, transport and catabolism	Multicopper oxidase	Laccase-17 OS=Arabidopsis thaliana OX=3702 GN=LAC17 PE=2 SV=1	Q	Secondary metabolites biosynthesis, transport and catabolism	laccase-17 [Glycine max]	molecular function: catalytic activity (GO:0003824);; biological process: metabolic process (GO:0008152);; biological process: single-organism process (GO:0044699);; molecular function: binding (GO:0005488);; cellular component: cell (GO:0005623);; cellular component: membrane (GO:0016020);; cellular component: cell part (GO:0044464);; biological process: localization (GO:0051179);; cellular comp…
gene-LOC100798474	1.17785	0.951064	1.1179	0	0	0	2.52e-08	-6.83278	down	--	--	Molecular Function: calcium activated cation channel activity (GO:0005227);; Cellular Component: plasma membrane (GO:0005886);; Cellular Component: integral component of membrane (GO:0016021);;	K21989|0.0e+00|gmx:100798474|K21989 calcium permeable stress-gated cation channel | (RefSeq) CSC1-like protein At4g02900 isoform X1	--	[R]	General function prediction only	Calcium-dependent channel, 7TM region, putative phosphate	CSC1-like protein At4g02900 OS=Arabidopsis thaliana OX=3702 GN=At4g02900 PE=3 SV=1	S	Function unknown	CSC1-like protein At4g02900 isoform X1 [Glycine max]	molecular function: transporter activity (GO:0005215);; biological process: localization (GO:0051179);; cellular component: cell (GO:0005623);; cellular component: membrane (GO:0016020);; cellular component: cell part (GO:0044464);; cellular component: membrane part (GO:0044425)
gene-LOC100817411	1.36333	1.39633	1.58093	1.13295	0.789338	2.40705	0.00136185	1.38435	up	[P]	Inorganic ion transport and metabolism	Cellular Component: plasma membrane (GO:0005886);; Biological Process: potassium ion transport (GO:0006813);; Molecular Function: potassium ion transmembrane transporter activity (GO:0015079);; Cellular Component: membrane (GO:0016020);; Cellular Component: integral component of membrane (GO:0016021);;	K03549|0.0e+00|gmx:100817411|K03549 KUP system potassium uptake protein | (RefSeq) potassium transporter 6 isoform X1	--	--	--	K+ potassium transporter	Potassium transporter 6 OS=Arabidopsis thaliana OX=3702 GN=POT6 PE=2 SV=1	P	Inorganic ion transport and metabolism	potassium transporter 6 isoform X1 [Glycine max]	cellular component: cell (GO:0005623);; cellular component: membrane (GO:0016020);; cellular component: cell part (GO:0044464);; biological process: localization (GO:0051179);; molecular function: transporter activity (GO:0005215);; cellular component: membrane part (GO:0044425)
gene-LOC100305679	42.0873	43.5198	44.6304	4.94843	1.62743	6.58484	3.5e-06	-1.88635	down	--	--	Cellular Component: cellular_component (GO:0005575);; Cellular Component: intracellular (GO:0005622);; Cellular Component: cell (GO:0005623);; Cellular Component: cytoplasm (GO:0005737);; Cellular Component: vacuole (GO:0005773);; Cellular Component: plasma membrane (GO:0005886);; Cellular Component: cell-cell junction (GO:0005911);; Cellular Component: plasmodesma (GO:0009506);; Cellular Compone…	--	--	--	--	Remorin, C-terminal region	Remorin OS=Solanum tuberosum OX=4113 PE=1 SV=1	S	Function unknown	uncharacterized protein LOC100305679 [Glycine max]	cellular component: cell (GO:0005623);; cellular component: cell part (GO:0044464);; cellular component: organelle (GO:0043226);; cellular component: membrane (GO:0016020);; cellular component: cell junction (GO:0030054);; cellular component: symplast (GO:0055044)
gene-LOC100793531	2.69842	1.50038	2.58929	1.86091	1.73743	1.75991	0.00433031	1.11182	up	--	--	Biological Process: regulation of immune system process (GO:0002682);; Biological Process: positive regulation of immune system process (GO:0002684);; Biological Process: regulation of response to biotic stimulus (GO:0002831);; Biological Process: positive regulation of response to biotic stimulus (GO:0002833);; Molecular Function: molecular_function (GO:0003674);; Molecular Function: GTPase acti…	K01537|1.3e-35|jcu:105638585|K01537 P-type Ca2+ transporter type 2C [EC:7.2.2.10] | (RefSeq) calcium-transporting ATPase 2, plasma membrane-type isoform X1	--	[R]	General function prediction only	C2 domain	Protein C2-DOMAIN ABA-RELATED 1 OS=Arabidopsis thaliana OX=3702 GN=CAR1 PE=1 SV=1	S	Function unknown	protein C2-DOMAIN ABA-RELATED 1 isoform X2 [Glycine max]	biological process: biological regulation (GO:0065007);; molecular function: molecular function regulator (GO:0098772);; molecular function: binding (GO:0005488);; cellular component: cell (GO:0005623);; cellular component: cell part (GO:0044464);; cellular component: organelle (GO:0043226);; cellular component: membrane (GO:0016020);; biological process: response to stimulus (GO:0050896)
gene-LOC100789339	3.13169	2.30729	3.27734	3.28989	3.34246	2.47291	5.82e-07	1.53541	up	[U]	Intracellular trafficking, secretion, and vesicular transport	Molecular Function: protein serine/threonine kinase activity (GO:0004674);; Molecular Function: ATP binding (GO:0005524);; Cellular Component: nucleus (GO:0005634);; Cellular Component: cytoplasm (GO:0005737);; Cellular Component: plasma membrane (GO:0005886);; Biological Process: protein phosphorylation (GO:0006468);;	K08286|1.1e-206|tcc:18598189|K08286 protein-serine/threonine kinase [EC:2.7.11.-] | (RefSeq) serine/threonine-protein kinase KIPK	--	[R]	General function prediction only	Protein kinase domain	Serine/threonine-protein kinase KIPK2 OS=Arabidopsis thaliana OX=3702 GN=KIPK2 PE=1 SV=1	T	Signal transduction mechanisms	serine/threonine-protein kinase D6PKL1 [Glycine max]	molecular function: catalytic activity (GO:0003824);; biological process: metabolic process (GO:0008152);; biological process: cellular process (GO:0009987);; molecular function: binding (GO:0005488);; cellular component: cell (GO:0005623);; cellular component: organelle (GO:0043226);; cellular component: cell part (GO:0044464);; cellular component: membrane (GO:0016020)
gene-LOC100804997	1.5599	1.4616	1.1883	2.15229	1.89243	1.40958	8.75e-08	1.81574	up	--	--	Biological Process: action potential (GO:0001508);; Biological Process: regulation of heart rate (GO:0002027);; Biological Process: system process (GO:0003008);; Biological Process: muscle system process (GO:0003012);; Biological Process: circulatory system process (GO:0003013);; Biological Process: heart process (GO:0003015);; Biological Process: cardiac chamber development (GO:0003205);; Biolog…	--	--	--	--	Ankyrin repeats (3 copies)	Protein VAPYRIN-LIKE OS=Medicago truncatula OX=3880 GN=VPYL PE=2 SV=1	M	Cell wall/membrane/envelope biogenesis	ankyrin repeat domain-containing protein 50 [Glycine max]	biological process: biological regulation (GO:0065007);; biological process: multicellular organismal process (GO:0032501);; biological process: developmental process (GO:0032502);; biological process: single-organism process (GO:0044699);; molecular function: binding (GO:0005488);; cellular component: cell (GO:0005623);; cellular component: cell part (GO:0044464);; cellular component: membrane (…
gene-LOC100306535	17.414	9.64889	18.9387	0.701563	0	0.443371	3.31e-08	-3.74929	down	[T]	Signal transduction mechanisms	Molecular Function: nucleotide binding (GO:0000166);; Molecular Function: molecular_function (GO:0003674);; Molecular Function: binding (GO:0005488);; Cellular Component: cellular_component (GO:0005575);; Cellular Component: cell (GO:0005623);; Cellular Component: plasma membrane (GO:0005886);; Molecular Function: drug binding (GO:0008144);; Cellular Component: membrane (GO:0016020);; Molecular F…	--	--	--	--	Universal stress protein family	--	T	Signal transduction mechanisms	uncharacterized protein LOC100306535 [Glycine max]	molecular function: binding (GO:0005488);; cellular component: cell (GO:0005623);; cellular component: membrane (GO:0016020);; cellular component: cell part (GO:0044464)
gene-HIR3	9.65357	5.8002	9.53383	0.856171	0.272247	0.700232	2.11e-09	-2.26497	down	[O]	Posttranslational modification, protein turnover, chaperones	Molecular Function: molecular_function (GO:0003674);; Molecular Function: binding (GO:0005488);; Molecular Function: protein binding (GO:0005515);; Cellular Component: cellular_component (GO:0005575);; Cellular Component: intracellular (GO:0005622);; Cellular Component: cell (GO:0005623);; Cellular Component: cytoplasm (GO:0005737);; Cellular Component: vacuole (GO:0005773);; Cellular Component: …	--	--	[C]	Energy production and conversion	SPFH domain / Band 7 family	Hypersensitive-induced reaction 1 protein OS=Capsicum annuum OX=4072 GN=HIR1 PE=1 SV=1	C	Energy production and conversion	hypersensitive-induced response protein 1-like [Glycine max]	molecular function: binding (GO:0005488);; cellular component: cell (GO:0005623);; cellular component: cell part (GO:0044464);; cellular component: organelle (GO:0043226);; cellular component: membrane (GO:0016020);; cellular component: organelle part (GO:0044422);; cellular component: cell junction (GO:0030054);; cellular component: symplast (GO:0055044)
gene-LOC112997619	1.4687	0.493644	1.24468	0.068553	0.057532	0.069186	8.1e-05	-2.37328	down	[E]	Amino acid transport and metabolism	Cellular Component: plasma membrane (GO:0005886);; Molecular Function: ligand-gated ion channel activity (GO:0015276);; Cellular Component: integral component of membrane (GO:0016021);; Molecular Function: signaling receptor activity (GO:0038023);;	K05387|2.6e-214|mdm:103408934|K05387 glutamate receptor, ionotropic, plant | (RefSeq) glutamate receptor 2.7-like	--	[PET]	Inorganic ion transport and metabolism;; Amino acid transport and metabolism;; Signal transduction mechanisms	Receptor family ligand binding region	Glutamate receptor 2.7 OS=Arabidopsis thaliana OX=3702 GN=GLR2.7 PE=2 SV=3	--	--	Glutamate receptor 2.7 isoform B [Glycine soja]	cellular component: cell (GO:0005623);; cellular component: membrane (GO:0016020);; cellular component: cell part (GO:0044464);; molecular function: transporter activity (GO:0005215);; molecular function: molecular transducer activity (GO:0060089);; biological process: localization (GO:0051179);; cellular component: membrane part (GO:0044425);; molecular function: signal transducer activity (GO:0…
gene-LOC100808971	4.61037	3.53454	5.58132	0.867332	0.538515	0.365809	0.000267355	-1.46902	down	--	--	Cellular Component: plasma membrane (GO:0005886);; Molecular Function: protein phosphatase 1 binding (GO:0008157);; Cellular Component: integral component of membrane (GO:0016021);; Molecular Function: protein phosphatase regulator activity (GO:0019888);; Biological Process: regulation of protein dephosphorylation (GO:0035304);;	K01184|1.8e-14|bna:106400152|K01184 polygalacturonase [EC:3.2.1.15] | (RefSeq) polygalacturonase	Pentose and glucuronate interconversions (ko00040)	[R]	General function prediction only	Ankyrin repeats (3 copies)	Ankyrin repeat-containing protein At5g02620 OS=Arabidopsis thaliana OX=3702 GN=At5g02620 PE=1 SV=1	S	Function unknown	ankyrin repeat-containing protein At5g02620 [Glycine max]	cellular component: cell (GO:0005623);; cellular component: membrane (GO:0016020);; cellular component: cell part (GO:0044464);; molecular function: binding (GO:0005488);; cellular component: membrane part (GO:0044425);; molecular function: molecular function regulator (GO:0098772);; biological process: biological regulation (GO:0065007)
gene-LOC100781769	0.307375	0.349357	0.48887	0.295447	0.238552	0.466662	0.00729872	1.22158	up	[M]	Cell wall/membrane/envelope biogenesis	Molecular Function: protein serine/threonine kinase activity (GO:0004674);; Molecular Function: ATP binding (GO:0005524);; Cellular Component: plasma membrane (GO:0005886);; Cellular Component: integral component of membrane (GO:0016021);;	K13415|1.1e-63|pda:103704826|K13415 protein brassinosteroid insensitive 1 [EC:2.7.10.1 2.7.11.1] | (RefSeq) LOW QUALITY PROTEIN: brassinosteroid LRR receptor kinase BRI1	Plant hormone signal transduction (ko04075)	--	--	Protein kinase domain	Probable LRR receptor-like serine/threonine-protein kinase At1g74360 OS=Arabidopsis thaliana OX=3702 GN=At1g74360 PE=1 SV=1	T	Signal transduction mechanisms	probable LRR receptor-like serine/threonine-protein kinase At1g74360 [Glycine max]	molecular function: catalytic activity (GO:0003824);; biological process: metabolic process (GO:0008152);; biological process: cellular process (GO:0009987);; molecular function: binding (GO:0005488);; cellular component: cell (GO:0005623);; cellular component: membrane (GO:0016020);; cellular component: cell part (GO:0044464);; cellular component: membrane part (GO:0044425)
gene-LOC100807473	4.7335	3.30771	5.08894	5.8548	6.92742	4.694	2.68e-08	1.89128	up	--	--	Cellular Component: plasma membrane (GO:0005886);; Cellular Component: membrane (GO:0016020);;	--	--	--	--	--	Probable membrane-associated kinase regulator 2 OS=Arabidopsis thaliana OX=3702 GN=MAKR2 PE=2 SV=1	S	Function unknown	probable membrane-associated kinase regulator 2 [Glycine max]	cellular component: cell (GO:0005623);; cellular component: membrane (GO:0016020);; cellular component: cell part (GO:0044464)
gene-LOC100807883	31.5308	41.022	35.4142	33.7848	35.3205	31.9322	3.68e-07	1.36426	up	[G]	Carbohydrate transport and metabolism	Cellular Component: plasma membrane (GO:0005886);; Molecular Function: water channel activity (GO:0015250);; Cellular Component: integral component of membrane (GO:0016021);;	K09872|2.5e-161|gmx:100807883|K09872 aquaporin PIP | (RefSeq) aquaporin PIP2-1	--	[G]	Carbohydrate transport and metabolism	Major intrinsic protein	Aquaporin PIP2-1 OS=Arabidopsis thaliana OX=3702 GN=PIP2-1 PE=1 SV=1	G	Carbohydrate transport and metabolism	aquaporin PIP2-1 [Glycine max]	cellular component: cell (GO:0005623);; cellular component: membrane (GO:0016020);; cellular component: cell part (GO:0044464);; molecular function: transporter activity (GO:0005215);; biological process: single-organism process (GO:0044699);; biological process: localization (GO:0051179);; cellular component: membrane part (GO:0044425)
gene-LOC100500457	9.58677	16.2992	10.9733	13.9948	6.68119	23.1447	0.000246839	1.60013	up	--	--	Molecular Function: molecular_function (GO:0003674);; Molecular Function: binding (GO:0005488);; Cellular Component: cellular_component (GO:0005575);; Cellular Component: cell (GO:0005623);; Cellular Component: plasma membrane (GO:0005886);; Biological Process: cell communication (GO:0007154);; Biological Process: cell-cell signaling (GO:0007267);; Biological Process: biological_process (GO:00081…	--	--	--	--	Remorin, C-terminal region	Remorin OS=Solanum tuberosum OX=4113 PE=1 SV=1	S	Function unknown	remorin family protein [Glycine max]	molecular function: binding (GO:0005488);; cellular component: cell (GO:0005623);; cellular component: membrane (GO:0016020);; cellular component: cell part (GO:0044464);; biological process: cellular process (GO:0009987);; biological process: signaling (GO:0023052);; biological process: single-organism process (GO:0044699)
gene-GMSSOS1	4.29054	3.44532	3.93187	12.0246	13.8896	9.8437	2.39e-26	3.08343	up	[T]	Signal transduction mechanisms	Cellular Component: plasma membrane (GO:0005886);; Cellular Component: chloroplast envelope (GO:0009941);; Molecular Function: sodium:proton antiporter activity (GO:0015385);; Molecular Function: potassium:proton antiporter activity (GO:0015386);; Cellular Component: integral component of membrane (GO:0016021);; Biological Process: regulation of intracellular pH (GO:0051453);; Biological Process:…	K14726|5.1e-40|cme:CYME_CMS152C|K14726 solute carrier family 9 (sodium/hydrogen exchanger), member 10/11 | (RefSeq) probable sodium/hydrogen antiporter	--	[P]	Inorganic ion transport and metabolism	Sodium/hydrogen exchanger family	Sodium/hydrogen exchanger 7 OS=Arabidopsis thaliana OX=3702 GN=NHX7 PE=1 SV=1	P	Inorganic ion transport and metabolism	Na+/H+ antiporter [Glycine max]	cellular component: cell (GO:0005623);; cellular component: membrane (GO:0016020);; cellular component: cell part (GO:0044464);; cellular component: organelle (GO:0043226);; cellular component: organelle part (GO:0044422);; molecular function: transporter activity (GO:0005215);; biological process: single-organism process (GO:0044699);; biological process: localization (GO:0051179);; biological p…
gene-LOC100786229	7.71062	10.4357	7.83619	0.590071	0.542067	0.829638	1.87e-12	-2.2563	down	--	--	Cellular Component: plasma membrane (GO:0005886);; Biological Process: immune response (GO:0006955);; Biological Process: plant-type hypersensitive response (GO:0009626);;	--	--	--	--	MAC/Perforin domain	MACPF domain-containing protein At1g14780 OS=Arabidopsis thaliana OX=3702 GN=At1g14780 PE=2 SV=1	S	Function unknown	MACPF domain-containing protein At1g14780 isoform X1 [Glycine max]	cellular component: cell (GO:0005623);; cellular component: membrane (GO:0016020);; cellular component: cell part (GO:0044464);; biological process: immune system process (GO:0002376);; biological process: response to stimulus (GO:0050896);; biological process: cellular process (GO:0009987);; biological process: single-organism process (GO:0044699)
gene-LOC112998545	0.112552	0.051437	0.015202	4.47824	2.80819	3.09962	5e-54	7.00112	up	[T]	Signal transduction mechanisms	Molecular Function: protein serine/threonine kinase activity (GO:0004674);; Molecular Function: ATP binding (GO:0005524);; Cellular Component: plasma membrane (GO:0005886);; Biological Process: protein phosphorylation (GO:0006468);; Cellular Component: integral component of membrane (GO:0016021);; Molecular Function: ubiquitin protein ligase binding (GO:0031625);; Biological Process: recognition …	K24104|3.0e-74|thj:104799061|K24104 GPN-loop GTPase | (RefSeq) LOW QUALITY PROTEIN: uncharacterized protein LOC104799061	--	--	--	Protein tyrosine and serine/threonine kinase	G-type lectin S-receptor-like serine/threonine-protein kinase At4g27290 OS=Arabidopsis thaliana OX=3702 GN=At4g27290 PE=3 SV=4	T	Signal transduction mechanisms	G-type lectin S-receptor-like serine/threonine-protein kinase At4g27290 isoform X1 [Glycine max]	molecular function: catalytic activity (GO:0003824);; biological process: metabolic process (GO:0008152);; biological process: cellular process (GO:0009987);; molecular function: binding (GO:0005488);; cellular component: cell (GO:0005623);; cellular component: membrane (GO:0016020);; cellular component: cell part (GO:0044464);; cellular component: membrane part (GO:0044425);; biological process:…
gene-LOC100811188	2.39754	2.6434	2.20972	0.195095	0.036584	0.071671	1.1e-08	-3.03212	down	[M]	Cell wall/membrane/envelope biogenesis	Molecular Function: transmembrane receptor protein serine/threonine kinase activity (GO:0004675);; Molecular Function: ATP binding (GO:0005524);; Cellular Component: plasma membrane (GO:0005886);; Biological Process: protein phosphorylation (GO:0006468);; Cellular Component: integral component of membrane (GO:0016021);;	K13430|2.8e-63|peq:110028637|K13430 serine/threonine-protein kinase PBS1 [EC:2.7.11.1] | (RefSeq) probable serine/threonine-protein kinase PBL7	Plant-pathogen interaction (ko04626)	[T]	Signal transduction mechanisms	Protein kinase domain	Probable receptor-like protein kinase At1g80640 OS=Arabidopsis thaliana OX=3702 GN=At1g80640 PE=2 SV=1	T	Signal transduction mechanisms	probable receptor-like protein kinase At1g80640 isoform X1 [Glycine max]	molecular function: catalytic activity (GO:0003824);; molecular function: signal transducer activity (GO:0004871);; molecular function: molecular transducer activity (GO:0060089);; biological process: metabolic process (GO:0008152);; biological process: cellular process (GO:0009987);; biological process: signaling (GO:0023052);; biological process: single-organism process (GO:0044699);; biologica…
gene-LOC100804958	3.39834	2.43544	2.59829	0.136305	0.163834	0.188061	1.3e-12	-2.55985	down	--	--	Biological Process: double-strand break repair via homologous recombination (GO:0000724);; Molecular Function: DNA binding (GO:0003677);; Molecular Function: ubiquitin-protein transferase activity (GO:0004842);; Cellular Component: plasma membrane (GO:0005886);; Molecular Function: zinc ion binding (GO:0008270);; Cellular Component: BRCA1-BARD1 complex (GO:0031436);; Biological Process: positive …	K10683|0.0e+00|gmx:100804958|K10683 BRCA1-associated RING domain protein 1 | (RefSeq) protein BREAST CANCER SUSCEPTIBILITY 1 homolog isoform X2	Homologous recombination (ko03440)	[LK]	Replication, recombination and repair;; Transcription	PHD-like zinc-binding domain	Protein BREAST CANCER SUSCEPTIBILITY 1 homolog OS=Arabidopsis thaliana OX=3702 GN=BRCA1 PE=1 SV=1	L	Replication, recombination and repair	protein BREAST CANCER SUSCEPTIBILITY 1 homolog isoform X1 [Glycine max]	biological process: metabolic process (GO:0008152);; biological process: cellular process (GO:0009987);; biological process: response to stimulus (GO:0050896);; molecular function: binding (GO:0005488);; molecular function: catalytic activity (GO:0003824);; cellular component: cell (GO:0005623);; cellular component: membrane (GO:0016020);; cellular component: cell part (GO:0044464);; cellular com…
gene-LOC100779437	5.7958	7.70578	5.57853	0.313415	0.128156	0.643898	3.18e-07	-2.64599	down	--	--	Biological Process: regulation of immune system process (GO:0002682);; Biological Process: positive regulation of immune system process (GO:0002684);; Biological Process: regulation of response to biotic stimulus (GO:0002831);; Biological Process: positive regulation of response to biotic stimulus (GO:0002833);; Molecular Function: molecular_function (GO:0003674);; Molecular Function: GTPase acti…	K01537|3.9e-40|jcu:105638585|K01537 P-type Ca2+ transporter type 2C [EC:7.2.2.10] | (RefSeq) calcium-transporting ATPase 2, plasma membrane-type isoform X1	--	[R]	General function prediction only	C2 domain	Protein C2-DOMAIN ABA-RELATED 4 OS=Arabidopsis thaliana OX=3702 GN=CAR4 PE=1 SV=1	S	Function unknown	protein C2-DOMAIN ABA-RELATED 4 [Glycine max]	biological process: biological regulation (GO:0065007);; molecular function: molecular function regulator (GO:0098772);; molecular function: binding (GO:0005488);; cellular component: cell (GO:0005623);; cellular component: cell part (GO:0044464);; cellular component: organelle (GO:0043226);; cellular component: membrane (GO:0016020);; biological process: response to stimulus (GO:0050896)
gene-GMLAX10	4.88675	4.18311	4.36754	3.11704	4.21803	2.54369	0.00571237	1.04902	up	--	--	Biological Process: amino acid transmembrane transport (GO:0003333);; Cellular Component: plasma membrane (GO:0005886);; Molecular Function: amino acid transmembrane transporter activity (GO:0015171);; Cellular Component: integral component of membrane (GO:0016021);;	K13946|6.3e-290|gmx:100799180|K13946 auxin influx carrier (AUX1 LAX family) | (RefSeq) GMLAX10; auxin influx carrier LAX10	Plant hormone signal transduction (ko04075)	[E]	Amino acid transport and metabolism	Transmembrane amino acid transporter protein	Auxin transporter-like protein 5 OS=Medicago truncatula OX=3880 GN=LAX5 PE=2 SV=1	E	Amino acid transport and metabolism	auxin transporter-like protein 10 [Glycine max]	biological process: single-organism process (GO:0044699);; biological process: localization (GO:0051179);; cellular component: cell (GO:0005623);; cellular component: membrane (GO:0016020);; cellular component: cell part (GO:0044464);; molecular function: transporter activity (GO:0005215);; cellular component: membrane part (GO:0044425)
gene-LOC100800724	10.2561	8.63099	8.5085	1.26992	1.35825	1.47458	1.83e-06	-1.26084	down	[M]	Cell wall/membrane/envelope biogenesis	Molecular Function: transmembrane receptor protein serine/threonine kinase activity (GO:0004675);; Molecular Function: ATP binding (GO:0005524);; Cellular Component: plasma membrane (GO:0005886);; Biological Process: protein phosphorylation (GO:0006468);; Cellular Component: integral component of membrane (GO:0016021);;	K01180|1.1e-76|cmax:111487562|K01180 endo-1,3(4)-beta-glucanase [EC:3.2.1.6] | (RefSeq) uncharacterized protein LOC111487562	--	[T]	Signal transduction mechanisms	Protein kinase domain	Probable serine/threonine-protein kinase At1g01540 OS=Arabidopsis thaliana OX=3702 GN=At1g01540 PE=1 SV=2	T	Signal transduction mechanisms	probable serine/threonine-protein kinase At1g01540 [Glycine max]	molecular function: catalytic activity (GO:0003824);; molecular function: signal transducer activity (GO:0004871);; molecular function: molecular transducer activity (GO:0060089);; biological process: metabolic process (GO:0008152);; biological process: cellular process (GO:0009987);; biological process: signaling (GO:0023052);; biological process: single-organism process (GO:0044699);; biologica…
gene-LOC100820109	63.374	113.753	66.866	8.12312	1.75876	9.87429	2.63e-05	-2.21121	down	--	--	Cellular Component: plasma membrane (GO:0005886);;	--	--	--	--	Cysteine-rich TM module stress tolerance	--	--	--	cysteine-rich and transmembrane domain-containing protein WIH2 [Glycine max]	cellular component: cell (GO:0005623);; cellular component: membrane (GO:0016020);; cellular component: cell part (GO:0044464)
gene-LOC100777375	3.00048	2.49283	3.71862	3.92485	2.54623	2.84518	8.39e-07	1.45327	up	--	--	Cellular Component: plasma membrane (GO:0005886);; Cellular Component: integral component of membrane (GO:0016021);; Molecular Function: 4 iron, 4 sulfur cluster binding (GO:0051539);;	K20855|8.3e-10|dzi:111275668|K20855 beta-1,3-galactosyltransferase 1/2/3/4/5/7/8 [EC:2.4.1.-] | (RefSeq) probable beta-1,3-galactosyltransferase 4 isoform X1	--	--	--	Domain of unknown function (DUF588)	CASP-like protein 2B1 OS=Ricinus communis OX=3988 GN=RCOM_0864260 PE=2 SV=1	S	Function unknown	CASP-like protein 2B1 [Glycine max]	cellular component: cell (GO:0005623);; cellular component: membrane (GO:0016020);; cellular component: cell part (GO:0044464);; cellular component: membrane part (GO:0044425);; molecular function: binding (GO:0005488)
--	58.5714	80.4688	60.2966	1.33122	0.632849	2.11007	1.61e-29	-4.15493	down	[W]	Extracellular structures	Molecular Function: transmembrane receptor protein serine/threonine kinase activity (GO:0004675);; Molecular Function: ATP binding (GO:0005524);; Cellular Component: plasma membrane (GO:0005886);; Biological Process: protein phosphorylation (GO:0006468);;	K13430|2.3e-97|nta:107764193|K13430 serine/threonine-protein kinase PBS1 [EC:2.7.11.1] | (RefSeq) serine/threonine-protein kinase PBS1-like	Plant-pathogen interaction (ko04626)	--	--	Protein kinase domain	Receptor-like cytosolic serine/threonine-protein kinase RBK2 OS=Arabidopsis thaliana OX=3702 GN=RBK2 PE=1 SV=1	T	Signal transduction mechanisms	probable receptor-like serine/threonine-protein kinase At5g57670 [Glycine soja]	molecular function: catalytic activity (GO:0003824);; molecular function: signal transducer activity (GO:0004871);; molecular function: molecular transducer activity (GO:0060089);; biological process: metabolic process (GO:0008152);; biological process: cellular process (GO:0009987);; biological process: signaling (GO:0023052);; biological process: single-organism process (GO:0044699);; biologica…
gene-LOC102661021	1.66918	2.41542	1.10949	0.116783	0.197953	0.131768	0.00686954	-1.93797	down	--	--	Cellular Component: plasma membrane (GO:0005886);;	--	--	--	--	Protein of unknown function (DUF740)	Protein OCTOPUS-like OS=Arabidopsis thaliana OX=3702 GN=OPSL1 PE=2 SV=1	S	Function unknown	LOW QUALITY PROTEIN: UPF0503 protein At3g09070, chloroplastic-like [Glycine max]	cellular component: cell (GO:0005623);; cellular component: membrane (GO:0016020);; cellular component: cell part (GO:0044464)
gene-LOC100527676	4.64524	4.03005	5.17861	0.361644	0.407067	0	0.00658749	-2.37531	down	--	--	Biological Process: response to acid chemical (GO:0001101);; Cellular Component: cellular_component (GO:0005575);; Cellular Component: cell (GO:0005623);; Cellular Component: plasma membrane (GO:0005886);; Biological Process: response to stress (GO:0006950);; Biological Process: response to osmotic stress (GO:0006970);; Biological Process: biological_process (GO:0008150);; Biological Process: res…	K03860|2.8e-09|nnu:104608881|K03860 phosphatidylinositol N-acetylglucosaminyltransferase subunit Q | (RefSeq) N-acetylglucosaminyl-phosphatidylinositol biosynthetic protein gpi1-like	Glycosylphosphatidylinositol (GPI)-anchor biosynthesis (ko00563)	--	--	Gibberellin regulated protein	Gibberellin-regulated protein 14 OS=Arabidopsis thaliana OX=3702 GN=GASA14 PE=1 SV=1	S	Function unknown	gibberellin-regulated protein 21 precursor [Glycine max]	biological process: response to stimulus (GO:0050896);; cellular component: cell (GO:0005623);; cellular component: membrane (GO:0016020);; cellular component: cell part (GO:0044464);; biological process: biological regulation (GO:0065007)
gene-LOC100790817	1.12216	0.691805	0.934784	0.113198	0.136547	0.148676	0.00784567	-1.2477	down	[T]	Signal transduction mechanisms	Molecular Function: protein serine/threonine kinase activity (GO:0004674);; Molecular Function: ATP binding (GO:0005524);; Cellular Component: plasma membrane (GO:0005886);; Biological Process: hormone-mediated signaling pathway (GO:0009755);; Cellular Component: integral component of membrane (GO:0016021);;	K00924|5.9e-144|hbr:110665822|K00924 kinase [EC:2.7.1.-] | (RefSeq) receptor-like protein kinase 5	--	--	--	Protein kinase domain	Receptor-like protein kinase 5 OS=Arabidopsis thaliana OX=3702 GN=RLK5 PE=1 SV=1	T	Signal transduction mechanisms	receptor-like protein kinase HSL1 [Glycine max]	molecular function: catalytic activity (GO:0003824);; biological process: metabolic process (GO:0008152);; biological process: cellular process (GO:0009987);; molecular function: binding (GO:0005488);; cellular component: cell (GO:0005623);; cellular component: membrane (GO:0016020);; cellular component: cell part (GO:0044464);; biological process: signaling (GO:0023052);; biological process: sin…
gene-LOC100775565	5.61964	6.1756	6.42201	0.355441	0.17583	0.181917	1.2e-21	-3.17966	down	--		Molecular Function: transmembrane receptor protein serine/threonine kinase activity (GO:0004675);; Molecular Function: ATP binding (GO:0005524);; Cellular Component: plasma membrane (GO:0005886);; Biological Process: protein phosphorylation (GO:0006468);; Cellular Component: integral component of membrane (GO:0016021);;	K13418|1.0e-138|ppp:112278174|K13418 somatic embryogenesis receptor kinase 1 [EC:2.7.10.1 2.7.11.1] | (RefSeq) LRR receptor kinase BAK1-like	--	--	--	Protein kinase domain	Probable LRR receptor-like serine/threonine-protein kinase At2g23950 OS=Arabidopsis thaliana OX=3702 GN=At2g23950 PE=1 SV=1	T	Signal transduction mechanisms	probable LRR receptor-like serine/threonine-protein kinase At2g23950 [Glycine max]	molecular function: catalytic activity (GO:0003824);; molecular function: signal transducer activity (GO:0004871);; molecular function: molecular transducer activity (GO:0060089);; biological process: metabolic process (GO:0008152);; biological process: cellular process (GO:0009987);; biological process: signaling (GO:0023052);; biological process: single-organism process (GO:0044699);; biologica…
gene-LOC100813247	28.1237	5.66174	26.9485	2.36528	2.46924	1.81642	0.00365414	-1.62533	down	[O]	Posttranslational modification, protein turnover, chaperones	Molecular Function: serine-type endopeptidase activity (GO:0004252);; Cellular Component: plasma membrane (GO:0005886);; Cellular Component: membrane (GO:0016020);; Biological Process: protein processing (GO:0016485);;	K15333|3.5e-85|nsy:104224633|K15333 tRNA guanosine-2'-O-methyltransferase [EC:2.1.1.34] | (RefSeq) uncharacterized protein LOC104224633	--	--	--	Subtilase family	Subtilisin-like protease SBT1.5 OS=Arabidopsis thaliana OX=3702 GN=SBT1.5 PE=2 SV=1	O	Posttranslational modification, protein turnover, chaperones	subtilisin-like protease SBT1.5 [Glycine max]	molecular function: catalytic activity (GO:0003824);; biological process: metabolic process (GO:0008152);; cellular component: cell (GO:0005623);; cellular component: membrane (GO:0016020);; cellular component: cell part (GO:0044464)
gene-LOC100799493	13.7036	9.25091	14.4534	0.34322	0.19475	0.061301	1.45e-19	-4.36363	down	--	--	Molecular Function: SNARE binding (GO:0000149);; Molecular Function: SNAP receptor activity (GO:0005484);; Cellular Component: plasma membrane (GO:0005886);; Biological Process: intracellular protein transport (GO:0006886);; Biological Process: exocytosis (GO:0006887);; Biological Process: vesicle fusion (GO:0006906);; Cellular Component: endomembrane system (GO:0012505);; Cellular Component: int…	K08486|4.9e-166|gmx:100799493|K08486 syntaxin 1B/2/3 | (RefSeq) syntaxin-related protein KNOLLE	SNARE interactions in vesicular transport (ko04130)	[U]	Intracellular trafficking, secretion, and vesicular transport	Syntaxin	Syntaxin-related protein KNOLLE OS=Arabidopsis thaliana OX=3702 GN=KN PE=1 SV=1	U	Intracellular trafficking, secretion, and vesicular transport	syntaxin-related protein KNOLLE [Glycine max]	molecular function: binding (GO:0005488);; cellular component: cell (GO:0005623);; cellular component: membrane (GO:0016020);; cellular component: cell part (GO:0044464);; biological process: localization (GO:0051179);; biological process: cellular process (GO:0009987);; biological process: single-organism process (GO:0044699);; biological process: cellular component organization or biogenesis (G…
gene-LOC100789471	8.80988	5.17601	8.92793	0	0	0.015703	5.37e-23	-8.05921	down	[T]	Signal transduction mechanisms	Molecular Function: protein serine/threonine kinase activity (GO:0004674);; Molecular Function: ATP binding (GO:0005524);; Cellular Component: plasma membrane (GO:0005886);; Biological Process: protein phosphorylation (GO:0006468);; Cellular Component: integral component of membrane (GO:0016021);;	K24104|3.5e-76|thj:104799061|K24104 GPN-loop GTPase | (RefSeq) LOW QUALITY PROTEIN: uncharacterized protein LOC104799061	--	--	--	Protein kinase domain	Cysteine-rich receptor-like protein kinase 26 OS=Arabidopsis thaliana OX=3702 GN=CRK26 PE=2 SV=1	T	Signal transduction mechanisms	cysteine-rich receptor-like protein kinase 26 [Glycine max]	molecular function: catalytic activity (GO:0003824);; biological process: metabolic process (GO:0008152);; biological process: cellular process (GO:0009987);; molecular function: binding (GO:0005488);; cellular component: cell (GO:0005623);; cellular component: membrane (GO:0016020);; cellular component: cell part (GO:0044464);; cellular component: membrane part (GO:0044425)
gene-LOC100782563	7.65123	8.13431	7.81752	0.756007	0.998128	1.12977	7.06e-08	-1.54424	down	--	--	Cellular Component: plasma membrane (GO:0005886);; Molecular Function: actin filament binding (GO:0051015);;	--	--	--	--	KIP1-like protein	Protein NETWORKED 1D OS=Arabidopsis thaliana OX=3702 GN=NET1D PE=3 SV=1	S	Function unknown	protein NETWORKED 1D [Glycine max]	cellular component: cell (GO:0005623);; cellular component: membrane (GO:0016020);; cellular component: cell part (GO:0044464);; molecular function: binding (GO:0005488)
gene-LOC100500076	1.54595	1.38274	1.55488	0.070586	0.024927	0.021738	9.31e-09	-3.66032	down	--	--	Biological Process: amino acid transmembrane transport (GO:0003333);; Cellular Component: plasma membrane (GO:0005886);; Molecular Function: amino acid transmembrane transporter activity (GO:0015171);; Cellular Component: integral component of membrane (GO:0016021);;	K19476|1.7e-89|cic:CICLE_v10026997mg|K19476 vacuolar protein sorting-associated protein IST1 | (RefSeq) hypothetical protein	Endocytosis (ko04144)	[E]	Amino acid transport and metabolism	Transmembrane amino acid transporter protein	Lysine histidine transporter-like 8 OS=Arabidopsis thaliana OX=3702 GN=AATL1 PE=1 SV=1	E	Amino acid transport and metabolism	lysine histidine transporter-like 8 [Glycine max]	biological process: single-organism process (GO:0044699);; biological process: localization (GO:0051179);; cellular component: cell (GO:0005623);; cellular component: membrane (GO:0016020);; cellular component: cell part (GO:0044464);; molecular function: transporter activity (GO:0005215);; cellular component: membrane part (GO:0044425)
gene-LOC100810360	1.92211	2.18601	1.94026	0	0.10128	0.202803	0.00247572	-2.52829	down	--	--	Cellular Component: plasma membrane (GO:0005886);; Cellular Component: membrane (GO:0016020);; Cellular Component: integral component of membrane (GO:0016021);;	--	--	--	--	Domain of unknown function (DUF588)	CASP-like protein 5C1 OS=Oryza sativa subsp. japonica OX=39947 GN=Os03g0767900 PE=2 SV=1	S	Function unknown	CASP-like protein 5C1 [Glycine max]	cellular component: cell (GO:0005623);; cellular component: membrane (GO:0016020);; cellular component: cell part (GO:0044464);; cellular component: membrane part (GO:0044425)
gene-LOC100811093	12.4795	14.6656	13.9803	2.14774	0.966076	3.59285	0.00442882	-1.19987	down	--	--	Molecular Function: phospholipid binding (GO:0005543);; Cellular Component: endosome (GO:0005768);; Cellular Component: plasma membrane (GO:0005886);; Biological Process: endocytosis (GO:0006897);; Cellular Component: clathrin vesicle coat (GO:0030125);; Molecular Function: clathrin binding (GO:0030276);; Cellular Component: intracellular membrane-bounded organelle (GO:0043231);;	K12471|2.6e-189|gmx:100811093|K12471 epsin | (RefSeq) epsin-3	Endocytosis (ko04144)	[F]	Nucleotide transport and metabolism	ENTH domain	--	F	Nucleotide transport and metabolism	epsin-3 [Glycine max]	molecular function: binding (GO:0005488);; cellular component: cell (GO:0005623);; cellular component: organelle (GO:0043226);; cellular component: cell part (GO:0044464);; cellular component: membrane (GO:0016020);; biological process: localization (GO:0051179);; cellular component: macromolecular complex (GO:0032991);; cellular component: organelle part (GO:0044422);; cellular component: membra…
gene-LOC100809182	7.14084	4.89097	7.5183	0.71885	0.177865	1.49756	0.00835256	-1.57516	down	--	--	Cellular Component: plasma membrane (GO:0005886);; Cellular Component: integral component of membrane (GO:0016021);; Molecular Function: transmembrane transporter activity (GO:0022857);;	--	--	--	--	EamA-like transporter family	WAT1-related protein At5g47470 OS=Arabidopsis thaliana OX=3702 GN=At5g47470 PE=3 SV=1	S	Function unknown	WAT1-related protein At5g47470 [Glycine max]	cellular component: cell (GO:0005623);; cellular component: membrane (GO:0016020);; cellular component: cell part (GO:0044464);; cellular component: membrane part (GO:0044425);; molecular function: transporter activity (GO:0005215);; biological process: localization (GO:0051179)
gene-GMSWEET22	64.7352	38.2965	69.4006	0.467995	0.165399	0	1.06e-06	-5.57917	down	--	--	Cellular Component: plasma membrane (GO:0005886);; Biological Process: carbohydrate transport (GO:0008643);; Cellular Component: integral component of membrane (GO:0016021);; Molecular Function: sugar transmembrane transporter activity (GO:0051119);;	K15382|2.0e-147|gmx:100794159|K15382 solute carrier family 50 (sugar transporter) | (RefSeq) GMSWEET22; bidirectional sugar transporter N3	--	[R]	General function prediction only	Sugar efflux transporter for intercellular exchange	Bidirectional sugar transporter N3 OS=Medicago truncatula OX=3880 GN=N3 PE=2 SV=1	U	Intracellular trafficking, secretion, and vesicular transport	bidirectional sugar transporter N3 [Glycine max]	cellular component: cell (GO:0005623);; cellular component: membrane (GO:0016020);; cellular component: cell part (GO:0044464);; biological process: single-organism process (GO:0044699);; biological process: localization (GO:0051179);; cellular component: membrane part (GO:0044425);; molecular function: transporter activity (GO:0005215)
gene-LOC100499700	11.4017	11.7591	12.6208	13.8012	7.80097	26.4873	6.47e-06	1.79794	up	--	--	Molecular Function: molecular_function (GO:0003674);; Molecular Function: binding (GO:0005488);; Cellular Component: cellular_component (GO:0005575);; Cellular Component: cell (GO:0005623);; Cellular Component: plasma membrane (GO:0005886);; Biological Process: cell communication (GO:0007154);; Biological Process: cell-cell signaling (GO:0007267);; Biological Process: biological_process (GO:00081…	--	--	--	--	Remorin, C-terminal region	Remorin OS=Solanum tuberosum OX=4113 PE=1 SV=1	S	Function unknown	uncharacterized protein LOC100499700 [Glycine max]	molecular function: binding (GO:0005488);; cellular component: cell (GO:0005623);; cellular component: membrane (GO:0016020);; cellular component: cell part (GO:0044464);; biological process: cellular process (GO:0009987);; biological process: signaling (GO:0023052);; biological process: single-organism process (GO:0044699)
gene-LOC100785375	10.4682	12.4347	10.3416	1.02211	1.1178	0.446323	5.88e-07	-2.14393	down	[V]	Defense mechanisms	Molecular Function: ATP binding (GO:0005524);; Cellular Component: plasma membrane (GO:0005886);; Cellular Component: integral component of membrane (GO:0016021);; Molecular Function: ATPase activity (GO:0016887);; Molecular Function: ATPase activity, coupled to transmembrane movement of substances (GO:0042626);; Biological Process: transmembrane transport (GO:0055085);;	K08712|1.3e-130|gsl:Gasu_29800|K08712 ATP-binding cassette, subfamily G (WHITE), member 2, SNQ2 | (RefSeq) ABC transporter, ATP-binding protein	ABC transporters (ko02010)	[Q]	Secondary metabolites biosynthesis, transport and catabolism	ABC-2 type transporter	ABC transporter G family member 32 OS=Arabidopsis thaliana OX=3702 GN=ABCG32 PE=1 SV=1	Q	Secondary metabolites biosynthesis, transport and catabolism	ABC transporter G family member 32 [Glycine max]	molecular function: binding (GO:0005488);; cellular component: cell (GO:0005623);; cellular component: membrane (GO:0016020);; cellular component: cell part (GO:0044464);; cellular component: membrane part (GO:0044425);; molecular function: catalytic activity (GO:0003824);; molecular function: transporter activity (GO:0005215);; biological process: localization (GO:0051179)
gene-LOC100815320	1.37607	1.41484	1.59996	0	0	0.013657	8.91e-10	-5.59693	down	[TK]	Signal transduction mechanisms;; Transcription	Molecular Function: calcium ion binding (GO:0005509);; Molecular Function: calmodulin binding (GO:0005516);; Molecular Function: ATP binding (GO:0005524);; Cellular Component: nucleus (GO:0005634);; Cellular Component: cytoplasm (GO:0005737);; Cellular Component: plasma membrane (GO:0005886);; Molecular Function: calcium-dependent protein serine/threonine kinase activity (GO:0009931);; Biological…	K13412|1.8e-306|gmx:100815320|K13412 calcium-dependent protein kinase [EC:2.7.11.1] | (RefSeq) calcium-dependent protein kinase 32 isoform X1	Plant-pathogen interaction (ko04626)	[T]	Signal transduction mechanisms	Protein kinase domain	Calcium-dependent protein kinase 32 OS=Arabidopsis thaliana OX=3702 GN=CPK32 PE=1 SV=1	T	Signal transduction mechanisms	calcium-dependent protein kinase 32 isoform X1 [Glycine max]	molecular function: binding (GO:0005488);; cellular component: cell (GO:0005623);; cellular component: organelle (GO:0043226);; cellular component: cell part (GO:0044464);; cellular component: membrane (GO:0016020);; molecular function: catalytic activity (GO:0003824);; biological process: metabolic process (GO:0008152);; biological process: cellular process (GO:0009987);; biological process: sig…
gene-LOC100500225	3.29223	3.70837	3.66913	0.328428	0.119518	0.291166	6.44e-10	-2.35933	down	[FH]	Nucleotide transport and metabolism;; Coenzyme transport and metabolism	Cellular Component: plasma membrane (GO:0005886);; Molecular Function: nucleobase transmembrane transporter activity (GO:0015205);; Biological Process: nucleobase transport (GO:0015851);; Cellular Component: integral component of membrane (GO:0016021);;	K03457|0.0e+00|gmx:100500225|K03457 nucleobase:cation symporter-1, NCS1 family | (RefSeq) nucleobase-cation symporter1 family protein	--	[FH]	Nucleotide transport and metabolism;; Coenzyme transport and metabolism	Permease for cytosine/purines, uracil, thiamine, allantoin	Purine-uracil permease NCS1 OS=Arabidopsis thaliana OX=3702 GN=NCS1 PE=1 SV=1	--	--	nucleobase-cation symporter1 family protein [Glycine max]	cellular component: cell (GO:0005623);; cellular component: membrane (GO:0016020);; cellular component: cell part (GO:0044464);; molecular function: transporter activity (GO:0005215);; biological process: localization (GO:0051179);; biological process: single-organism process (GO:0044699);; cellular component: membrane part (GO:0044425)
gene-LOC100807921	15.4276	19.6095	15.9915	2.68637	2.12977	3.94756	0.000185075	-1.10036	down	[M]	Cell wall/membrane/envelope biogenesis	Molecular Function: protein kinase activity (GO:0004672);; Molecular Function: protein serine/threonine kinase activity (GO:0004674);; Molecular Function: ATP binding (GO:0005524);; Cellular Component: plasma membrane (GO:0005886);;	K01968|3.3e-148|psom:113350054|K01968 3-methylcrotonyl-CoA carboxylase alpha subunit [EC:6.4.1.4] | (RefSeq) LOW QUALITY PROTEIN: methylcrotonoyl-CoA carboxylase subunit alpha, mitochondrial-like	Valine, leucine and isoleucine degradation (ko00280)	[T]	Signal transduction mechanisms	Protein tyrosine and serine/threonine kinase	Serine/threonine-protein kinase STY13 OS=Arabidopsis thaliana OX=3702 GN=STY13 PE=1 SV=2	T	Signal transduction mechanisms	serine/threonine-protein kinase STY13 [Glycine max]	molecular function: catalytic activity (GO:0003824);; biological process: metabolic process (GO:0008152);; biological process: cellular process (GO:0009987);; molecular function: binding (GO:0005488);; cellular component: cell (GO:0005623);; cellular component: membrane (GO:0016020);; cellular component: cell part (GO:0044464)
gene-LOC100787428	0.134019	0.205139	0.167391	1.24341	0.815931	1.32762	3.82e-23	4.057	up	[E]	Amino acid transport and metabolism	Cellular Component: plasma membrane (GO:0005886);; Molecular Function: peptide:proton symporter activity (GO:0015333);; Cellular Component: integral component of membrane (GO:0016021);; Molecular Function: oligopeptide transmembrane transporter activity (GO:0035673);; Molecular Function: peptide transmembrane transporter activity (GO:1904680);;	K14638|9.7e-189|cic:CICLE_v10007831mg|K14638 solute carrier family 15 (peptide/histidine transporter), member 3/4 | (RefSeq) hypothetical protein	--	[E]	Amino acid transport and metabolism	POT family	Protein NRT1/ PTR FAMILY 1.2 OS=Arabidopsis thaliana OX=3702 GN=NPF1.2 PE=1 SV=1	E	Amino acid transport and metabolism	protein NRT1/ PTR FAMILY 1.2-like [Glycine max]	cellular component: cell (GO:0005623);; cellular component: membrane (GO:0016020);; cellular component: cell part (GO:0044464);; molecular function: transporter activity (GO:0005215);; biological process: single-organism process (GO:0044699);; biological process: localization (GO:0051179);; cellular component: membrane part (GO:0044425)
gene-LOC100789821	34.1572	47.7707	40.2993	0.067641	0.088085	0	2.31e-11	-6.93132	down	[N]	Cell motility	Cellular Component: Golgi apparatus (GO:0005794);; Cellular Component: trans-Golgi network (GO:0005802);; Cellular Component: plasma membrane (GO:0005886);; Biological Process: plant-type primary cell wall biogenesis (GO:0009833);; Cellular Component: integral component of membrane (GO:0016021);; Molecular Function: cellulose synthase activity (GO:0016759);; Molecular Function: cellulose synthase…	K10999|0.0e+00|gmx:100789821|K10999 cellulose synthase A [EC:2.4.1.12] | (RefSeq) cellulose synthase A catalytic subunit 7 [UDP-forming]	--	--	--	Cellulose synthase	Cellulose synthase A catalytic subunit 7 [UDP-forming] OS=Arabidopsis thaliana OX=3702 GN=CESA7 PE=1 SV=1	G	Carbohydrate transport and metabolism	cellulose synthase A catalytic subunit 7 [UDP-forming] [Glycine max]	cellular component: cell (GO:0005623);; cellular component: organelle (GO:0043226);; cellular component: cell part (GO:0044464);; cellular component: organelle part (GO:0044422);; cellular component: membrane (GO:0016020);; biological process: cellular process (GO:0009987);; biological process: single-organism process (GO:0044699);; biological process: cellular component organization or biogenesi…
gene-LOC100812814	1.94384	1.72019	2.02613	1.74078	1.23367	1.84354	2.92e-07	1.19399	up	[T]	Signal transduction mechanisms	Molecular Function: protein serine/threonine kinase activity (GO:0004674);; Molecular Function: ATP binding (GO:0005524);; Cellular Component: plasma membrane (GO:0005886);; Biological Process: protein phosphorylation (GO:0006468);; Cellular Component: integral component of membrane (GO:0016021);; Biological Process: recognition of pollen (GO:0048544);;	K24104|1.7e-80|thj:104799061|K24104 GPN-loop GTPase | (RefSeq) LOW QUALITY PROTEIN: uncharacterized protein LOC104799061	--	--	--	Protein tyrosine and serine/threonine kinase	G-type lectin S-receptor-like serine/threonine-protein kinase At1g11410 OS=Arabidopsis thaliana OX=3702 GN=At1g11410 PE=3 SV=3	T	Signal transduction mechanisms	G-type lectin S-receptor-like serine/threonine-protein kinase At1g11410 [Glycine max]	molecular function: catalytic activity (GO:0003824);; biological process: metabolic process (GO:0008152);; biological process: cellular process (GO:0009987);; molecular function: binding (GO:0005488);; cellular component: cell (GO:0005623);; cellular component: membrane (GO:0016020);; cellular component: cell part (GO:0044464);; cellular component: membrane part (GO:0044425);; biological process:…
gene-LOC100810834	4.07347	4.52491	4.8244	0	0.090583	0	0.00744002	-3.87687	down	--	--	Molecular Function: nucleoside transmembrane transporter activity (GO:0005337);; Cellular Component: plasma membrane (GO:0005886);; Cellular Component: integral component of membrane (GO:0016021);;	K15014|2.1e-222|gmx:100810834|K15014 solute carrier family 29 (equilibrative nucleoside transporter), member 1/2/3 | (RefSeq) equilibrative nucleotide transporter 8	--	[F]	Nucleotide transport and metabolism	Nucleoside transporter	Equilibrative nucleotide transporter 8 OS=Arabidopsis thaliana OX=3702 GN=ETN8 PE=2 SV=1	F	Nucleotide transport and metabolism	equilibrative nucleotide transporter 8 [Glycine max]	molecular function: transporter activity (GO:0005215);; biological process: single-organism process (GO:0044699);; biological process: localization (GO:0051179);; cellular component: cell (GO:0005623);; cellular component: membrane (GO:0016020);; cellular component: cell part (GO:0044464);; cellular component: membrane part (GO:0044425)
gene-LOC100814262	30.9044	38.9358	33.3732	1.79167	2.20821	1.34661	5.97e-16	-2.73839	down	[N]	Cell motility	Cellular Component: plasma membrane (GO:0005886);; Cellular Component: integral component of membrane (GO:0016021);; Molecular Function: cellulose synthase (UDP-forming) activity (GO:0016760);; Biological Process: cellulose biosynthetic process (GO:0030244);; Molecular Function: metal ion binding (GO:0046872);; Biological Process: cell wall organization (GO:0071555);;	K10999|0.0e+00|gmx:100814262|K10999 cellulose synthase A [EC:2.4.1.12] | (RefSeq) cellulose synthase A catalytic subunit 3 [UDP-forming]	--	--	--	Cellulose synthase	Cellulose synthase A catalytic subunit 3 [UDP-forming] OS=Arabidopsis thaliana OX=3702 GN=CESA3 PE=1 SV=2	G	Carbohydrate transport and metabolism	cellulose synthase A catalytic subunit 3 [UDP-forming] [Glycine max]	cellular component: cell (GO:0005623);; cellular component: membrane (GO:0016020);; cellular component: cell part (GO:0044464);; cellular component: membrane part (GO:0044425);; molecular function: catalytic activity (GO:0003824);; biological process: metabolic process (GO:0008152);; biological process: cellular process (GO:0009987);; biological process: single-organism process (GO:0044699);; mol…
gene-LOC100816998	4.02304	2.93544	3.26762	4.68888	3.5616	4.25008	4.29e-13	1.7302	up	--	--	Cellular Component: endoplasmic reticulum membrane (GO:0005789);; Cellular Component: plasma membrane (GO:0005886);; Biological Process: endoplasmic reticulum-plasma membrane tethering (GO:0061817);; Biological Process: endoplasmic reticulum membrane organization (GO:0090158);;	--	--	[U]	Intracellular trafficking, secretion, and vesicular transport	MSP (Major sperm protein) domain	Vesicle-associated protein 4-2 OS=Arabidopsis thaliana OX=3702 GN=PVA42 PE=1 SV=1	U	Intracellular trafficking, secretion, and vesicular transport	vesicle-associated protein 4-2 [Glycine max]	cellular component: cell (GO:0005623);; cellular component: membrane (GO:0016020);; cellular component: organelle (GO:0043226);; cellular component: organelle part (GO:0044422);; cellular component: membrane part (GO:0044425);; cellular component: cell part (GO:0044464);; biological process: cellular process (GO:0009987);; biological process: single-organism process (GO:0044699);; biological proc…
gene-LOC100817655	2.28592	1.25905	2.56714	0.21277	0.033975	0.021386	3.43e-05	-2.93465	down	--		Molecular Function: protein kinase activity (GO:0004672);; Molecular Function: ATP binding (GO:0005524);; Cellular Component: plasma membrane (GO:0005886);; Biological Process: hormone-mediated signaling pathway (GO:0009755);; Cellular Component: integral component of membrane (GO:0016021);;	K20718|1.0e-69|ats:109779221|K20718 LRR receptor-like serine/threonine-protein kinase ERECTA [EC:2.7.11.1] | (RefSeq) LOC109779221; LRR receptor-like serine/threonine-protein kinase ERECTA isoform X1	MAPK signaling pathway - plant (ko04016)	--	--	Leucine rich repeat	Receptor-like protein kinase OS=Ipomoea nil OX=35883 GN=INRPK1 PE=2 SV=2	T	Signal transduction mechanisms	receptor-like protein kinase [Glycine max]	molecular function: catalytic activity (GO:0003824);; biological process: metabolic process (GO:0008152);; biological process: cellular process (GO:0009987);; molecular function: binding (GO:0005488);; cellular component: cell (GO:0005623);; cellular component: membrane (GO:0016020);; cellular component: cell part (GO:0044464);; biological process: signaling (GO:0023052);; biological process: sin…
gene-LOC100806074	0.594444	3.02978	1.34374	0	0	0	9.94e-08	-6.7521	down	[DPM]	Cell cycle control, cell division, chromosome partitioning;; Inorganic ion transport and metabolism;; Cell wall/membrane/envelope biogenesis	Molecular Function: ferroxidase activity (GO:0004322);; Molecular Function: copper ion binding (GO:0005507);; Cellular Component: plasma membrane (GO:0005886);; Biological Process: iron ion transport (GO:0006826);; Biological Process: lignin catabolic process (GO:0046274);; Cellular Component: apoplast (GO:0048046);; Molecular Function: hydroquinone:oxygen oxidoreductase activity (GO:0052716);; B…	K05909|0.0e+00|gmx:100806074|K05909 laccase [EC:1.10.3.2] | (RefSeq) laccase-17	--	[Q]	Secondary metabolites biosynthesis, transport and catabolism	Multicopper oxidase	Laccase-17 OS=Arabidopsis thaliana OX=3702 GN=LAC17 PE=2 SV=1	Q	Secondary metabolites biosynthesis, transport and catabolism	laccase-17 [Glycine max]	molecular function: catalytic activity (GO:0003824);; biological process: metabolic process (GO:0008152);; biological process: single-organism process (GO:0044699);; molecular function: binding (GO:0005488);; cellular component: cell (GO:0005623);; cellular component: membrane (GO:0016020);; cellular component: cell part (GO:0044464);; biological process: localization (GO:0051179);; biological pr…
gene-LOC100793138	5.05218	8.09713	4.38449	0.506408	0.543341	0.895643	1e-05	-1.7489	down	--	--	Molecular Function: GTPase activator activity (GO:0005096);; Cellular Component: cytoplasm (GO:0005737);; Cellular Component: plasma membrane (GO:0005886);; Molecular Function: Rab GTPase binding (GO:0017137);; Biological Process: regulation of exocytosis (GO:0017157);; Molecular Function: syntaxin binding (GO:0019905);; Molecular Function: myosin II binding (GO:0045159);;	K08518|3.3e-94|cpap:110820897|K08518 syntaxin-binding protein 5 | (RefSeq) uncharacterized protein LOC110820897 isoform X1	--	[U]	Intracellular trafficking, secretion, and vesicular transport	Anaphase-promoting complex subunit 4 WD40 domain	--	U	Intracellular trafficking, secretion, and vesicular transport	uncharacterized protein LOC100793138 isoform X1 [Glycine max]	molecular function: molecular function regulator (GO:0098772);; biological process: biological regulation (GO:0065007);; cellular component: cell (GO:0005623);; cellular component: cell part (GO:0044464);; cellular component: membrane (GO:0016020);; molecular function: binding (GO:0005488)
gene-LOC100499681	15.8173	35.2543	14.8607	0	0	0	1.05e-15	-8.9169	down	--	--	Cellular Component: cellular_component (GO:0005575);; Cellular Component: cell (GO:0005623);; Cellular Component: plasma membrane (GO:0005886);; Cellular Component: membrane (GO:0016020);; Cellular Component: intrinsic component of membrane (GO:0031224);; Cellular Component: anchored component of membrane (GO:0031225);; Cellular Component: intrinsic component of plasma membrane (GO:0031226);; Cel…	--	--	--	--	--	Uncharacterized GPI-anchored protein At3g06035 OS=Arabidopsis thaliana OX=3702 GN=At3g06035 PE=2 SV=1	S	Function unknown	uncharacterized protein LOC100499681 precursor [Glycine max]	cellular component: cell (GO:0005623);; cellular component: membrane (GO:0016020);; cellular component: cell part (GO:0044464);; cellular component: membrane part (GO:0044425)
gene-LOC100777641	1.24151	0.946465	2.21399	0	0	0	9.59e-07	-6.285	down	--	--	Cellular Component: plasma membrane (GO:0005886);; Cellular Component: integral component of membrane (GO:0016021);; Molecular Function: transmembrane transporter activity (GO:0022857);;	K17500|1.1e-60|nto:104085001|K17500 integrin-linked kinase-associated serine/threonine phosphatase 2C [EC:3.1.3.16] | (RefSeq) WAT1-related protein At3g18200 isoform X1	--	--	--	EamA-like transporter family	WAT1-related protein At4g08290 OS=Arabidopsis thaliana OX=3702 GN=At4g08290 PE=2 SV=1	S	Function unknown	WAT1-related protein At4g08290 [Glycine max]	cellular component: cell (GO:0005623);; cellular component: membrane (GO:0016020);; cellular component: cell part (GO:0044464);; cellular component: membrane part (GO:0044425);; molecular function: transporter activity (GO:0005215);; biological process: localization (GO:0051179)
--	4.48397	7.0261	4.45962	0.581645	0.456489	0.467322	1.44e-08	-1.97682	down	[M]	Cell wall/membrane/envelope biogenesis	Molecular Function: transmembrane receptor protein serine/threonine kinase activity (GO:0004675);; Molecular Function: ATP binding (GO:0005524);; Cellular Component: plasma membrane (GO:0005886);; Biological Process: protein phosphorylation (GO:0006468);;	K13430|2.1e-90|nta:107764193|K13430 serine/threonine-protein kinase PBS1 [EC:2.7.11.1] | (RefSeq) serine/threonine-protein kinase PBS1-like	Plant-pathogen interaction (ko04626)	--	--	Protein kinase domain	Proline-rich receptor-like protein kinase PERK9 OS=Arabidopsis thaliana OX=3702 GN=PERK9 PE=1 SV=1	T	Signal transduction mechanisms	hypothetical protein GLYMA_04G245300 [Glycine max]	molecular function: catalytic activity (GO:0003824);; molecular function: signal transducer activity (GO:0004871);; molecular function: molecular transducer activity (GO:0060089);; biological process: metabolic process (GO:0008152);; biological process: cellular process (GO:0009987);; biological process: signaling (GO:0023052);; biological process: single-organism process (GO:0044699);; biologica…
gene-LOC100783028	11.1544	9.18843	12.4302	2.17746	1.26418	1.27652	1.35e-05	-1.33337	down	--	--	Cellular Component: plasma membrane (GO:0005886);; Cellular Component: integral component of membrane (GO:0016021);; Molecular Function: 4 iron, 4 sulfur cluster binding (GO:0051539);;	K14313|2.0e-11|csat:104705004|K14313 nuclear pore complex protein Nup53 | (RefSeq) CASP-like protein 3A1	RNA transport (ko03013)	--	--	Domain of unknown function (DUF588)	CASP-like protein 3A1 OS=Populus trichocarpa OX=3694 GN=POPTRDRAFT_553757 PE=3 SV=2	S	Function unknown	CASP-like protein 3A1 [Glycine max]	cellular component: cell (GO:0005623);; cellular component: membrane (GO:0016020);; cellular component: cell part (GO:0044464);; cellular component: membrane part (GO:0044425);; molecular function: binding (GO:0005488)
--	1.03782	0.592944	1.14931	1.98729	1.30573	0.951712	2.34e-06	1.96669	up	[P]	Inorganic ion transport and metabolism	Cellular Component: plasma membrane (GO:0005886);; Biological Process: cellular cadmium ion homeostasis (GO:0006876);; Biological Process: cellular iron ion homeostasis (GO:0006879);; Biological Process: cellular zinc ion homeostasis (GO:0006882);; Molecular Function: cation transmembrane transporter activity (GO:0008324);; Molecular Function: cadmium ion transmembrane transporter activity (GO:00…	--	--	[P]	Inorganic ion transport and metabolism	Dimerisation domain of Zinc Transporter	Metal tolerance protein 9 OS=Arabidopsis thaliana OX=3702 GN=MTP9 PE=3 SV=2	P	Inorganic ion transport and metabolism	hypothetical protein GLYMA_08G164700 [Glycine max]	cellular component: cell (GO:0005623);; cellular component: membrane (GO:0016020);; cellular component: cell part (GO:0044464);; biological process: cellular process (GO:0009987);; biological process: single-organism process (GO:0044699);; biological process: biological regulation (GO:0065007);; molecular function: transporter activity (GO:0005215);; biological process: localization (GO:0051179);…
gene-LOC100804158	6.91513	2.7522	7.02053	12.5403	5.43942	8.35851	1.08e-06	2.05401	up	[T]	Signal transduction mechanisms	Molecular Function: nucleotide binding (GO:0000166);; Molecular Function: molecular_function (GO:0003674);; Molecular Function: binding (GO:0005488);; Cellular Component: cellular_component (GO:0005575);; Cellular Component: cell (GO:0005623);; Cellular Component: plasma membrane (GO:0005886);; Molecular Function: drug binding (GO:0008144);; Cellular Component: membrane (GO:0016020);; Molecular F…	--	--	--	--	Universal stress protein family	--	T	Signal transduction mechanisms	universal stress protein PHOS32 [Glycine max]	molecular function: binding (GO:0005488);; cellular component: cell (GO:0005623);; cellular component: membrane (GO:0016020);; cellular component: cell part (GO:0044464)
gene-LOC100814921	0.386641	0.401459	0.595521	12.3832	9.96482	33.0065	7.28e-48	6.58144	up	--	--	Cellular Component: plasma membrane (GO:0005886);; Cellular Component: integral component of membrane (GO:0016021);; Molecular Function: transmembrane transporter activity (GO:0022857);;	K17500|2.8e-54|nto:104085001|K17500 integrin-linked kinase-associated serine/threonine phosphatase 2C [EC:3.1.3.16] | (RefSeq) WAT1-related protein At3g18200 isoform X1	--	--	--	EamA-like transporter family	WAT1-related protein At1g44800 OS=Arabidopsis thaliana OX=3702 GN=At1g44800 PE=1 SV=1	S	Function unknown	WAT1-related protein At1g44800 [Glycine max]	cellular component: cell (GO:0005623);; cellular component: membrane (GO:0016020);; cellular component: cell part (GO:0044464);; cellular component: membrane part (GO:0044425);; molecular function: transporter activity (GO:0005215);; biological process: localization (GO:0051179)
gene-LOC100305387	0.759978	1.46766	0.995005	0.021551	0.06896	0.093099	0.000239651	-2.43873	down	[T]	Signal transduction mechanisms	Molecular Function: protein kinase activity (GO:0004672);; Molecular Function: ATP binding (GO:0005524);; Cellular Component: plasma membrane (GO:0005886);; Cellular Component: plasmodesma (GO:0009506);; Cellular Component: integral component of membrane (GO:0016021);; Biological Process: protein autophosphorylation (GO:0046777);;	K13435|2.7e-86|spen:107018783|K13435 serine/threonine-protein kinase Pto | (RefSeq) receptor-like protein kinase HERK 1 isoform X2	Plant-pathogen interaction (ko04626)	[T]	Signal transduction mechanisms	Protein tyrosine and serine/threonine kinase	Receptor-like protein kinase FERONIA OS=Arabidopsis thaliana OX=3702 GN=FER PE=1 SV=1	T	Signal transduction mechanisms	FERONIA receptor-like kinase precursor [Glycine max]	molecular function: catalytic activity (GO:0003824);; biological process: metabolic process (GO:0008152);; biological process: cellular process (GO:0009987);; molecular function: binding (GO:0005488);; cellular component: cell (GO:0005623);; cellular component: membrane (GO:0016020);; cellular component: cell part (GO:0044464);; cellular component: cell junction (GO:0030054);; cellular component:…
gene-LOC100796779	13.6254	19.1734	16.5691	0	0	0	4.64e-21	-9.86632	down	[DPM]	Cell cycle control, cell division, chromosome partitioning;; Inorganic ion transport and metabolism;; Cell wall/membrane/envelope biogenesis	Molecular Function: ferroxidase activity (GO:0004322);; Molecular Function: copper ion binding (GO:0005507);; Cellular Component: plasma membrane (GO:0005886);; Biological Process: iron ion transport (GO:0006826);; Biological Process: lignin catabolic process (GO:0046274);; Cellular Component: apoplast (GO:0048046);; Molecular Function: hydroquinone:oxygen oxidoreductase activity (GO:0052716);; B…	K05909|0.0e+00|gmx:100796779|K05909 laccase [EC:1.10.3.2] | (RefSeq) laccase-4	--	[Q]	Secondary metabolites biosynthesis, transport and catabolism	Multicopper oxidase	Laccase-4 OS=Arabidopsis thaliana OX=3702 GN=IRX12 PE=2 SV=2	Q	Secondary metabolites biosynthesis, transport and catabolism	laccase-4 [Glycine max]	molecular function: catalytic activity (GO:0003824);; biological process: metabolic process (GO:0008152);; biological process: single-organism process (GO:0044699);; molecular function: binding (GO:0005488);; cellular component: cell (GO:0005623);; cellular component: membrane (GO:0016020);; cellular component: cell part (GO:0044464);; biological process: localization (GO:0051179);; biological pr…
gene-LOC102670203	1.13142	1.15532	1.4458	0.053286	0.06023	0.019522	1.41e-08	-3.16243	down	--	--	Molecular Function: calmodulin binding (GO:0005516);; Cellular Component: plasma membrane (GO:0005886);;	--	--	--	--	Plant calmodulin-binding domain	Calmodulin binding protein PICBP OS=Arabidopsis thaliana OX=3702 GN=PICBP PE=2 SV=1	S	Function unknown	uncharacterized protein LOC102670203 [Glycine max]	molecular function: binding (GO:0005488);; cellular component: cell (GO:0005623);; cellular component: membrane (GO:0016020);; cellular component: cell part (GO:0044464)
gene-LOC100815154	6.17816	4.44626	7.05659	0	0.036033	0.062634	1.32e-22	-5.50735	down	[E]	Amino acid transport and metabolism	Cellular Component: plasma membrane (GO:0005886);; Molecular Function: peptide:proton symporter activity (GO:0015333);; Cellular Component: integral component of membrane (GO:0016021);; Molecular Function: oligopeptide transmembrane transporter activity (GO:0035673);; Molecular Function: peptide transmembrane transporter activity (GO:1904680);;	K14638|4.5e-195|cmos:111458629|K14638 solute carrier family 15 (peptide/histidine transporter), member 3/4 | (RefSeq) protein NRT1/ PTR FAMILY 2.13-like	--	[E]	Amino acid transport and metabolism	POT family	Protein NRT1/ PTR FAMILY 2.13 OS=Arabidopsis thaliana OX=3702 GN=NPF2.13 PE=1 SV=1	E	Amino acid transport and metabolism	protein NRT1/ PTR FAMILY 2.13 [Glycine max]	cellular component: cell (GO:0005623);; cellular component: membrane (GO:0016020);; cellular component: cell part (GO:0044464);; molecular function: transporter activity (GO:0005215);; biological process: single-organism process (GO:0044699);; biological process: localization (GO:0051179);; cellular component: membrane part (GO:0044425)
gene-LOC100815000	1.87353	2.38525	2.09639	1.821	2.02185	1.93245	3.93e-05	1.25204	up	--	--	Cellular Component: 1,3-beta-D-glucan synthase complex (GO:0000148);; Molecular Function: 1,3-beta-D-glucan synthase activity (GO:0003843);; Cellular Component: plasma membrane (GO:0005886);; Biological Process: (1->3)-beta-D-glucan biosynthetic process (GO:0006075);; Cellular Component: integral component of membrane (GO:0016021);; Molecular Function: glucosyltransferase activity (GO:0046527);;	K11000|0.0e+00|gmx:100784105|K11000 callose synthase [EC:2.4.1.-] | (RefSeq) callose synthase 7	--	[M]	Cell wall/membrane/envelope biogenesis	1,3-beta-glucan synthase component	Callose synthase 7 OS=Arabidopsis thaliana OX=3702 GN=CALS7 PE=3 SV=3	M	Cell wall/membrane/envelope biogenesis	callose synthase 7 isoform X1 [Glycine max]	cellular component: cell (GO:0005623);; cellular component: membrane (GO:0016020);; cellular component: macromolecular complex (GO:0032991);; cellular component: membrane part (GO:0044425);; cellular component: cell part (GO:0044464);; molecular function: catalytic activity (GO:0003824);; biological process: metabolic process (GO:0008152);; biological process: cellular process (GO:0009987);; biol…
gene-LOC100798413	6.71244	4.47473	6.76617	0.078768	0.270928	0.262208	3.96e-11	-3.26417	down	--	--	Cellular Component: cellular_component (GO:0005575);; Cellular Component: cell (GO:0005623);; Cellular Component: plasma membrane (GO:0005886);; Cellular Component: membrane (GO:0016020);; Cellular Component: cell part (GO:0044464);; Cellular Component: cell periphery (GO:0071944);;	--	--	--	--	NPH3 family	BTB/POZ domain-containing protein At1g67900 OS=Arabidopsis thaliana OX=3702 GN=At1g67900 PE=1 SV=1	S	Function unknown	BTB/POZ domain-containing protein At1g67900 [Glycine max]	cellular component: cell (GO:0005623);; cellular component: membrane (GO:0016020);; cellular component: cell part (GO:0044464)
gene-GMAPHO1_H5	3.95741	2.20695	3.64873	6.72454	7.00831	18.736	4.76e-13	3.10365	up	--	--	Molecular Function: inositol hexakisphosphate binding (GO:0000822);; Cellular Component: cytoplasm (GO:0005737);; Cellular Component: Golgi apparatus (GO:0005794);; Cellular Component: plasma membrane (GO:0005886);; Biological Process: phosphate ion transport (GO:0006817);; Molecular Function: phosphate ion transmembrane transporter activity (GO:0015114);; Cellular Component: integral component o…	K24195|0.0e+00|gmx:100794580|K24195 xenotropic and polytropic retrovirus receptor 1 | (RefSeq) GMAPHO1;H5; phosphate transporter PHO1 isoform X2	--	[U]	Intracellular trafficking, secretion, and vesicular transport	EXS family	Phosphate transporter PHO1 OS=Arabidopsis thaliana OX=3702 GN=PHO1 PE=1 SV=1	U	Intracellular trafficking, secretion, and vesicular transport	phosphate transporter PHO1 isoform X1 [Glycine max]	molecular function: binding (GO:0005488);; cellular component: cell (GO:0005623);; cellular component: cell part (GO:0044464);; cellular component: organelle (GO:0043226);; cellular component: membrane (GO:0016020);; biological process: localization (GO:0051179);; molecular function: transporter activity (GO:0005215);; cellular component: membrane part (GO:0044425);; biological process: cellular …
gene-GMSWEET21	18.576	21.42	22.7065	2.11149	0.910607	2.65745	1.97e-09	-2.02982	down	--	--	Cellular Component: plasma membrane (GO:0005886);; Biological Process: carbohydrate transport (GO:0008643);; Cellular Component: integral component of membrane (GO:0016021);; Molecular Function: sugar transmembrane transporter activity (GO:0051119);;	K15382|1.5e-136|gmx:100805676|K15382 solute carrier family 50 (sugar transporter) | (RefSeq) GMSWEET21; sugar efflux transporter SWEET21	--	[R]	General function prediction only	Sugar efflux transporter for intercellular exchange	Bidirectional sugar transporter SWEET14 OS=Oryza sativa subsp. indica OX=39946 GN=SWEET14 PE=2 SV=1	U	Intracellular trafficking, secretion, and vesicular transport	sugar efflux transporter SWEET21 [Glycine max]	cellular component: cell (GO:0005623);; cellular component: membrane (GO:0016020);; cellular component: cell part (GO:0044464);; biological process: single-organism process (GO:0044699);; biological process: localization (GO:0051179);; cellular component: membrane part (GO:0044425);; molecular function: transporter activity (GO:0005215)
gene-GMAPHO1_H8	1.88493	1.67682	1.84319	2.85648	2.36189	5.07094	1.62e-13	2.3351	up	--	--	Molecular Function: inositol hexakisphosphate binding (GO:0000822);; Cellular Component: cytoplasm (GO:0005737);; Cellular Component: Golgi apparatus (GO:0005794);; Cellular Component: plasma membrane (GO:0005886);; Biological Process: phosphate ion transport (GO:0006817);; Molecular Function: phosphate ion transmembrane transporter activity (GO:0015114);; Cellular Component: integral component o…	K24195|0.0e+00|gmx:100802251|K24195 xenotropic and polytropic retrovirus receptor 1 | (RefSeq) GMAPHO1;H8; phosphate transporter PHO1 isoform X2	--	[U]	Intracellular trafficking, secretion, and vesicular transport	EXS family	Phosphate transporter PHO1 OS=Arabidopsis thaliana OX=3702 GN=PHO1 PE=1 SV=1	U	Intracellular trafficking, secretion, and vesicular transport	phosphate transporter PHO1 isoform X1 [Glycine max]	molecular function: binding (GO:0005488);; cellular component: cell (GO:0005623);; cellular component: cell part (GO:0044464);; cellular component: organelle (GO:0043226);; cellular component: membrane (GO:0016020);; biological process: localization (GO:0051179);; molecular function: transporter activity (GO:0005215);; cellular component: membrane part (GO:0044425);; biological process: cellular …
gene-LOC100789002	7.60357	2.07194	6.50374	0	0	0	1.67e-13	-8.42183	down	[T]	Signal transduction mechanisms	Molecular Function: protein serine/threonine kinase activity (GO:0004674);; Molecular Function: ATP binding (GO:0005524);; Cellular Component: plasma membrane (GO:0005886);; Biological Process: protein phosphorylation (GO:0006468);; Cellular Component: integral component of membrane (GO:0016021);;	K24104|2.4e-77|thj:104799061|K24104 GPN-loop GTPase | (RefSeq) LOW QUALITY PROTEIN: uncharacterized protein LOC104799061	--	--	--	Protein kinase domain	Cysteine-rich receptor-like protein kinase 26 OS=Arabidopsis thaliana OX=3702 GN=CRK26 PE=2 SV=1	T	Signal transduction mechanisms	cysteine-rich receptor-like protein kinase 26 [Glycine max]	molecular function: catalytic activity (GO:0003824);; biological process: metabolic process (GO:0008152);; biological process: cellular process (GO:0009987);; molecular function: binding (GO:0005488);; cellular component: cell (GO:0005623);; cellular component: membrane (GO:0016020);; cellular component: cell part (GO:0044464);; cellular component: membrane part (GO:0044425)
gene-LOC100815410	11.3318	12.5797	10.9928	0.927118	0.797974	0.365768	1.75e-10	-2.53802	down	[V]	Defense mechanisms	Molecular Function: ATP binding (GO:0005524);; Cellular Component: plasma membrane (GO:0005886);; Cellular Component: integral component of membrane (GO:0016021);; Molecular Function: ATPase activity (GO:0016887);; Molecular Function: ATPase activity, coupled to transmembrane movement of substances (GO:0042626);; Biological Process: transmembrane transport (GO:0055085);;	K08712|1.1e-127|gsl:Gasu_29800|K08712 ATP-binding cassette, subfamily G (WHITE), member 2, SNQ2 | (RefSeq) ABC transporter, ATP-binding protein	ABC transporters (ko02010)	[Q]	Secondary metabolites biosynthesis, transport and catabolism	ABC-2 type transporter	ABC transporter G family member 32 OS=Arabidopsis thaliana OX=3702 GN=ABCG32 PE=1 SV=1	Q	Secondary metabolites biosynthesis, transport and catabolism	ABC transporter G family member 32 [Glycine max]	molecular function: binding (GO:0005488);; cellular component: cell (GO:0005623);; cellular component: membrane (GO:0016020);; cellular component: cell part (GO:0044464);; cellular component: membrane part (GO:0044425);; molecular function: catalytic activity (GO:0003824);; molecular function: transporter activity (GO:0005215);; biological process: localization (GO:0051179)
gene-LOC100804766	11.1291	7.44687	10.7369	0.772465	0.516013	0.324052	2.06e-13	-2.67634	down	[W]	Extracellular structures	Molecular Function: transmembrane receptor protein serine/threonine kinase activity (GO:0004675);; Molecular Function: ATP binding (GO:0005524);; Cellular Component: plasma membrane (GO:0005886);; Biological Process: protein phosphorylation (GO:0006468);;	K01180|6.7e-83|cmax:111487562|K01180 endo-1,3(4)-beta-glucanase [EC:3.2.1.6] | (RefSeq) uncharacterized protein LOC111487562	--	[T]	Signal transduction mechanisms	Protein kinase domain	Inactive protein kinase SELMODRAFT_444075 OS=Selaginella moellendorffii OX=88036 GN=SELMODRAFT_444075 PE=2 SV=1	T	Signal transduction mechanisms	inactive protein kinase SELMODRAFT_444075 [Glycine max]	molecular function: catalytic activity (GO:0003824);; molecular function: signal transducer activity (GO:0004871);; molecular function: molecular transducer activity (GO:0060089);; biological process: metabolic process (GO:0008152);; biological process: cellular process (GO:0009987);; biological process: signaling (GO:0023052);; biological process: single-organism process (GO:0044699);; biologica…
gene-LOC100795958	15.3813	20.1692	16.2234	2.74378	2.80415	2.68668	2.01e-05	-1.14225	down	--	--	Molecular Function: molecular_function (GO:0003674);; Molecular Function: binding (GO:0005488);; Molecular Function: protein binding (GO:0005515);; Molecular Function: calmodulin binding (GO:0005516);; Cellular Component: cellular_component (GO:0005575);; Cellular Component: intracellular (GO:0005622);; Cellular Component: cell (GO:0005623);; Cellular Component: cytoplasm (GO:0005737);; Cellular …	K21843|0.0e+00|gmx:100795958|K21843 tetratricopeptide repeat protein 7 | (RefSeq) protein NPGR1 isoform X1	--	[T]	Signal transduction mechanisms	Tetratricopeptide repeat	Protein NPGR1 OS=Arabidopsis thaliana OX=3702 GN=NPGR1 PE=1 SV=1	T	Signal transduction mechanisms	protein NPGR1 isoform X1 [Glycine max]	molecular function: binding (GO:0005488);; cellular component: cell (GO:0005623);; cellular component: cell part (GO:0044464);; cellular component: membrane (GO:0016020);; biological process: metabolic process (GO:0008152);; biological process: single-organism process (GO:0044699);; biological process: cellular process (GO:0009987);; biological process: localization (GO:0051179);; biological proc…
gene-LOC100527846	2.86439	7.98263	3.64153	0	0	0	8.55e-10	-7.3965	down	--	--	Cellular Component: plasma membrane (GO:0005886);; Biological Process: plant-type secondary cell wall biogenesis (GO:0009834);;	--	--	--	--	Fasciclin domain	Fasciclin-like arabinogalactan protein 6 OS=Arabidopsis thaliana OX=3702 GN=FLA6 PE=2 SV=2	S	Function unknown	putative fasciclin-like arabinogalactan precursor [Glycine max]	cellular component: cell (GO:0005623);; cellular component: membrane (GO:0016020);; cellular component: cell part (GO:0044464);; biological process: cellular process (GO:0009987);; biological process: cellular component organization or biogenesis (GO:0071840)
gene-LOC100782344	1.87169	1.57537	1.38247	1.89479	1.70867	1.51384	2.23e-07	1.53321	up	--		Biological Process: defense response to oomycetes (GO:0002229);; Molecular Function: transmembrane receptor protein serine/threonine kinase activity (GO:0004675);; Molecular Function: ATP binding (GO:0005524);; Cellular Component: plasma membrane (GO:0005886);; Biological Process: defense response (GO:0006952);; Cellular Component: integral component of membrane (GO:0016021);; Molecular Function:…	K22133|1.3e-89|egr:104443802|K22133 oxalate---CoA ligase [EC:6.2.1.8] | (RefSeq) oxalate--CoA ligase	Glyoxylate and dicarboxylate metabolism (ko00630)	--	--	Legume lectin domain	L-type lectin-domain containing receptor kinase IX.1 OS=Arabidopsis thaliana OX=3702 GN=LECRK91 PE=1 SV=1	T	Signal transduction mechanisms	L-type lectin-domain containing receptor kinase IX.1 [Glycine max]	biological process: response to stimulus (GO:0050896);; biological process: multi-organism process (GO:0051704);; molecular function: catalytic activity (GO:0003824);; molecular function: signal transducer activity (GO:0004871);; molecular function: molecular transducer activity (GO:0060089);; biological process: metabolic process (GO:0008152);; biological process: cellular process (GO:0009987);;…
gene-LOC100784180	10.7848	7.71483	9.86985	7.69074	9.8944	7.03142	7.58e-05	1.28676	up	[O]	Posttranslational modification, protein turnover, chaperones	Molecular Function: serine-type endopeptidase activity (GO:0004252);; Cellular Component: plasma membrane (GO:0005886);; Cellular Component: membrane (GO:0016020);; Biological Process: protein processing (GO:0016485);;	K15333|6.0e-85|nsy:104224633|K15333 tRNA guanosine-2'-O-methyltransferase [EC:2.1.1.34] | (RefSeq) uncharacterized protein LOC104224633	--	--	--	Subtilase family	Subtilisin-like protease SBT1.5 OS=Arabidopsis thaliana OX=3702 GN=SBT1.5 PE=2 SV=1	O	Posttranslational modification, protein turnover, chaperones	subtilisin-like protease SBT1.5 [Glycine max]	molecular function: catalytic activity (GO:0003824);; biological process: metabolic process (GO:0008152);; cellular component: cell (GO:0005623);; cellular component: membrane (GO:0016020);; cellular component: cell part (GO:0044464)
gene-GMIQD22	4.17882	3.36488	4.02904	3.54006	2.75628	3.62623	2.3e-09	1.23073	up	--	--	Molecular Function: protein binding (GO:0005515);; Cellular Component: cellular_component (GO:0005575);; Cellular Component: intracellular (GO:0005622);; Cellular Component: cell (GO:0005623);; Cellular Component: cytoplasm (GO:0005737);; Cellular Component: cytosol (GO:0005829);; Cellular Component: cytoskeleton (GO:0005856);; Cellular Component: microtubule associated complex (GO:0005875);; Cel…	--	--	--	--	Protein of unknown function (DUF4005)	Protein IQ-DOMAIN 20 OS=Arabidopsis thaliana OX=3702 GN=IQD20 PE=1 SV=1	S	Function unknown	protein IQ-DOMAIN 14 [Glycine max]	molecular function: binding (GO:0005488);; cellular component: cell (GO:0005623);; cellular component: cell part (GO:0044464);; cellular component: organelle (GO:0043226);; cellular component: macromolecular complex (GO:0032991);; cellular component: organelle part (GO:0044422);; cellular component: membrane (GO:0016020)
gene-GMIQD34	3.12209	3.03116	3.0002	0.193645	0.285567	0.171798	7.43e-07	-2.2179	down	--	--	Molecular Function: protein binding (GO:0005515);; Cellular Component: cellular_component (GO:0005575);; Cellular Component: intracellular (GO:0005622);; Cellular Component: cell (GO:0005623);; Cellular Component: cytoplasm (GO:0005737);; Cellular Component: cytosol (GO:0005829);; Cellular Component: cytoskeleton (GO:0005856);; Cellular Component: microtubule associated complex (GO:0005875);; Cel…	--	--	--	--	Protein of unknown function (DUF4005)	Protein IQ-DOMAIN 20 OS=Arabidopsis thaliana OX=3702 GN=IQD20 PE=1 SV=1	S	Function unknown	protein IQ-DOMAIN 34 [Glycine max]	molecular function: binding (GO:0005488);; cellular component: cell (GO:0005623);; cellular component: cell part (GO:0044464);; cellular component: organelle (GO:0043226);; cellular component: macromolecular complex (GO:0032991);; cellular component: organelle part (GO:0044422);; cellular component: membrane (GO:0016020)
gene-LOC100781629	1.80207	0.862018	1.32597	3.20722	4.57038	2.53492	5.8e-11	2.84799	up	--	--	Cellular Component: cellular_component (GO:0005575);; Cellular Component: intracellular (GO:0005622);; Cellular Component: cell (GO:0005623);; Cellular Component: cytoplasm (GO:0005737);; Cellular Component: plasma membrane (GO:0005886);; Cellular Component: chloroplast (GO:0009507);; Cellular Component: plastid (GO:0009536);; Cellular Component: membrane (GO:0016020);; Cellular Component: organe…	--	--	--	--	--	Uncharacterized protein At5g41620 OS=Arabidopsis thaliana OX=3702 GN=At5g41620 PE=2 SV=2	S	Function unknown	uncharacterized protein At5g41620 isoform X1 [Glycine max]	cellular component: cell (GO:0005623);; cellular component: cell part (GO:0044464);; cellular component: membrane (GO:0016020);; cellular component: organelle (GO:0043226)
gene-LOC100782049	4.09129	10.0651	4.56652	1.24958	0.73195	0.952051	0.00761503	-1.22356	down	--	--	Molecular Function: GTPase activator activity (GO:0005096);; Cellular Component: cytoplasm (GO:0005737);; Cellular Component: plasma membrane (GO:0005886);; Molecular Function: Rab GTPase binding (GO:0017137);; Biological Process: regulation of exocytosis (GO:0017157);; Molecular Function: syntaxin binding (GO:0019905);; Molecular Function: myosin II binding (GO:0045159);;	K08518|2.3e-90|dzi:111295998|K08518 syntaxin-binding protein 5 | (RefSeq) uncharacterized protein LOC111295998 isoform X1	--	[U]	Intracellular trafficking, secretion, and vesicular transport	Lethal giant larvae(Lgl) like, C-terminal	--	U	Intracellular trafficking, secretion, and vesicular transport	uncharacterized protein LOC100782049 isoform X1 [Glycine max]	molecular function: molecular function regulator (GO:0098772);; biological process: biological regulation (GO:0065007);; cellular component: cell (GO:0005623);; cellular component: cell part (GO:0044464);; cellular component: membrane (GO:0016020);; molecular function: binding (GO:0005488)
gene-LOC100793043	5.99197	7.93	5.26928	1.03663	0.655172	0.838297	2.88e-05	-1.45789	down	--	--	Molecular Function: nucleoside transmembrane transporter activity (GO:0005337);; Cellular Component: plasma membrane (GO:0005886);; Cellular Component: integral component of membrane (GO:0016021);;	K15014|1.5e-228|gmx:100793043|K15014 solute carrier family 29 (equilibrative nucleoside transporter), member 1/2/3 | (RefSeq) equilibrative nucleotide transporter 1	--	[F]	Nucleotide transport and metabolism	Nucleoside transporter	Equilibrative nucleotide transporter 1 OS=Arabidopsis thaliana OX=3702 GN=ENT1 PE=1 SV=1	F	Nucleotide transport and metabolism	equilibrative nucleotide transporter 1 [Glycine max]	molecular function: transporter activity (GO:0005215);; biological process: single-organism process (GO:0044699);; biological process: localization (GO:0051179);; cellular component: cell (GO:0005623);; cellular component: membrane (GO:0016020);; cellular component: cell part (GO:0044464);; cellular component: membrane part (GO:0044425)
gene-LOC100779523	0.534426	0.468476	0.804663	1.11408	1.44068	0.920257	1.31e-08	2.39954	up	--		Molecular Function: protein kinase activity (GO:0004672);; Molecular Function: ATP binding (GO:0005524);; Cellular Component: plasma membrane (GO:0005886);; Cellular Component: plasmodesma (GO:0009506);; Cellular Component: integral component of membrane (GO:0016021);; Biological Process: protein autophosphorylation (GO:0046777);;	K13435|1.2e-76|spen:107018783|K13435 serine/threonine-protein kinase Pto | (RefSeq) receptor-like protein kinase HERK 1 isoform X2	Plant-pathogen interaction (ko04626)	[T]	Signal transduction mechanisms	Protein tyrosine and serine/threonine kinase	Receptor-like protein kinase FERONIA OS=Arabidopsis thaliana OX=3702 GN=FER PE=1 SV=1	T	Signal transduction mechanisms	LOW QUALITY PROTEIN: receptor-like protein kinase FERONIA, partial [Glycine max]	molecular function: catalytic activity (GO:0003824);; biological process: metabolic process (GO:0008152);; biological process: cellular process (GO:0009987);; molecular function: binding (GO:0005488);; cellular component: cell (GO:0005623);; cellular component: membrane (GO:0016020);; cellular component: cell part (GO:0044464);; cellular component: cell junction (GO:0030054);; cellular component:…
gene-GMAPHO1_H3	1.25688	0.843367	1.50984	2.74791	2.19855	2.05683	1.42e-13	2.38262	up	--	--	Molecular Function: inositol hexakisphosphate binding (GO:0000822);; Cellular Component: cytoplasm (GO:0005737);; Cellular Component: Golgi apparatus (GO:0005794);; Cellular Component: trans-Golgi network (GO:0005802);; Cellular Component: plasma membrane (GO:0005886);; Biological Process: phosphate ion transport (GO:0006817);; Molecular Function: phosphate ion transmembrane transporter activity …	K24195|7.6e-133|ppp:112273420|K24195 xenotropic and polytropic retrovirus receptor 1 | (RefSeq) phosphate transporter PHO1-like	--	[U]	Intracellular trafficking, secretion, and vesicular transport	EXS family	Phosphate transporter PHO1 homolog 9 OS=Arabidopsis thaliana OX=3702 GN=PHO1-H9 PE=2 SV=1	U	Intracellular trafficking, secretion, and vesicular transport	phosphate transporter PHO1 homolog 9 isoform X1 [Glycine max]	molecular function: binding (GO:0005488);; cellular component: cell (GO:0005623);; cellular component: cell part (GO:0044464);; cellular component: organelle (GO:0043226);; cellular component: organelle part (GO:0044422);; cellular component: membrane (GO:0016020);; biological process: localization (GO:0051179);; molecular function: transporter activity (GO:0005215);; cellular component: membrane…
gene-LOC100784215	2.01039	1.59433	1.54884	0.026667	0	0	1.58e-11	-5.56132	down	[W]	Extracellular structures	Molecular Function: protein serine/threonine kinase activity (GO:0004674);; Molecular Function: ATP binding (GO:0005524);; Cellular Component: plasma membrane (GO:0005886);; Biological Process: protein phosphorylation (GO:0006468);; Cellular Component: integral component of membrane (GO:0016021);;	K24104|1.3e-80|thj:104799061|K24104 GPN-loop GTPase | (RefSeq) LOW QUALITY PROTEIN: uncharacterized protein LOC104799061	--	--	--	Protein tyrosine and serine/threonine kinase	Cysteine-rich receptor-like protein kinase 26 OS=Arabidopsis thaliana OX=3702 GN=CRK26 PE=2 SV=1	T	Signal transduction mechanisms	cysteine-rich receptor-like protein kinase 26 [Glycine max]	molecular function: catalytic activity (GO:0003824);; biological process: metabolic process (GO:0008152);; biological process: cellular process (GO:0009987);; molecular function: binding (GO:0005488);; cellular component: cell (GO:0005623);; cellular component: membrane (GO:0016020);; cellular component: cell part (GO:0044464);; cellular component: membrane part (GO:0044425)
gene-LOC100777295	14.9662	8.69112	14.295	0.279243	0.149445	0.16717	1.44e-43	-4.4843	down	[T]	Signal transduction mechanisms	Molecular Function: ATP binding (GO:0005524);; Cellular Component: plasma membrane (GO:0005886);; Cellular Component: integral component of membrane (GO:0016021);; Molecular Function: ATPase activity (GO:0016887);; Molecular Function: ATPase activity, coupled to transmembrane movement of substances (GO:0042626);; Biological Process: transmembrane transport (GO:0055085);;	K08712|4.0e-135|gsl:Gasu_29800|K08712 ATP-binding cassette, subfamily G (WHITE), member 2, SNQ2 | (RefSeq) ABC transporter, ATP-binding protein	ABC transporters (ko02010)	[Q]	Secondary metabolites biosynthesis, transport and catabolism	ABC-2 type transporter	Pleiotropic drug resistance protein 1 OS=Nicotiana tabacum OX=4097 GN=PDR1 PE=2 SV=1	Q	Secondary metabolites biosynthesis, transport and catabolism	pleiotropic drug resistance protein 1 [Glycine max]	molecular function: binding (GO:0005488);; cellular component: cell (GO:0005623);; cellular component: membrane (GO:0016020);; cellular component: cell part (GO:0044464);; cellular component: membrane part (GO:0044425);; molecular function: catalytic activity (GO:0003824);; molecular function: transporter activity (GO:0005215);; biological process: localization (GO:0051179)
gene-LOC100306284	3.34564	3.11442	3.93576	0.072779	0.152145	0.262372	1.33e-07	-2.80634	down	--	--	Cellular Component: plasma membrane (GO:0005886);; Molecular Function: kinase inhibitor activity (GO:0019210);;	K14499|6.3e-145|gmx:100306284|K14499 BRI1 kinase inhibitor 1 | (RefSeq) uncharacterized protein LOC100306284	Plant hormone signal transduction (ko04075)	--	--	--	BRI1 kinase inhibitor 1 OS=Arabidopsis thaliana OX=3702 GN=BKI1 PE=1 SV=1	S	Function unknown	uncharacterized protein LOC100306284 [Glycine max]	cellular component: cell (GO:0005623);; cellular component: membrane (GO:0016020);; cellular component: cell part (GO:0044464);; molecular function: molecular function regulator (GO:0098772);; biological process: biological regulation (GO:0065007)
gene-LOC100500041	14.4466	16.0082	11.2768	0.554959	0.26422	2.99124	0.00694762	-1.97015	down	--	--	Cellular Component: plasma membrane (GO:0005886);; Cellular Component: integral component of membrane (GO:0016021);;	--	--	--	--	Domain of unknown function (DUF588)	CASP-like protein 1E2 OS=Glycine max OX=3847 PE=2 SV=1	S	Function unknown	CASP-like protein 1E2 [Glycine max]	cellular component: cell (GO:0005623);; cellular component: membrane (GO:0016020);; cellular component: cell part (GO:0044464);; cellular component: membrane part (GO:0044425)
gene-GMLAX8	6.45911	6.5847	5.34833	0.420243	0.28467	0.109193	3.73e-10	-2.94463	down	--	--	Biological Process: amino acid transmembrane transport (GO:0003333);; Cellular Component: plasma membrane (GO:0005886);; Molecular Function: amino acid transmembrane transporter activity (GO:0015171);; Cellular Component: integral component of membrane (GO:0016021);;	K13946|2.5e-275|gmx:100815243|K13946 auxin influx carrier (AUX1 LAX family) | (RefSeq) GMLAX8; auxin transporter-like protein 3	Plant hormone signal transduction (ko04075)	[E]	Amino acid transport and metabolism	Transmembrane amino acid transporter protein	Auxin transporter-like protein 3 OS=Medicago truncatula OX=3880 GN=LAX3 PE=2 SV=1	E	Amino acid transport and metabolism	auxin transporter-like protein 3 [Glycine max]	biological process: single-organism process (GO:0044699);; biological process: localization (GO:0051179);; cellular component: cell (GO:0005623);; cellular component: membrane (GO:0016020);; cellular component: cell part (GO:0044464);; molecular function: transporter activity (GO:0005215);; cellular component: membrane part (GO:0044425)
gene-LOC100796374	11.377	20.6677	12.327	0.87466	1.02909	0.473191	4.56e-09	-2.67034	down	--	--	Cellular Component: Golgi apparatus (GO:0005794);; Cellular Component: trans-Golgi network (GO:0005802);; Cellular Component: plasma membrane (GO:0005886);; Biological Process: plant-type primary cell wall biogenesis (GO:0009833);; Cellular Component: integral component of membrane (GO:0016021);; Molecular Function: cellulose synthase activity (GO:0016759);; Molecular Function: cellulose synthase…	K10999|1.9e-93|zju:107421701|K10999 cellulose synthase A [EC:2.4.1.12] | (RefSeq) cellulose synthase A catalytic subunit 2 [UDP-forming]-like	--	--	--	Cellulose synthase	Cellulose synthase-like protein G1 OS=Arabidopsis thaliana OX=3702 GN=CSLG1 PE=2 SV=1	G	Carbohydrate transport and metabolism	cellulose synthase-like protein G1 [Glycine max]	cellular component: cell (GO:0005623);; cellular component: organelle (GO:0043226);; cellular component: cell part (GO:0044464);; cellular component: organelle part (GO:0044422);; cellular component: membrane (GO:0016020);; biological process: cellular process (GO:0009987);; biological process: single-organism process (GO:0044699);; biological process: cellular component organization or biogenesi…
gene-LOC100808275	2.96221	6.07174	2.49708	0.050521	0	0	4.93e-11	-5.82249	down	--	--	Cellular Component: plasma membrane (GO:0005886);; Cellular Component: integral component of membrane (GO:0016021);; Molecular Function: transmembrane transporter activity (GO:0022857);;	K17500|4.8e-56|nto:104085001|K17500 integrin-linked kinase-associated serine/threonine phosphatase 2C [EC:3.1.3.16] | (RefSeq) WAT1-related protein At3g18200 isoform X1	--	--	--	EamA-like transporter family	WAT1-related protein At3g18200 OS=Arabidopsis thaliana OX=3702 GN=At3g18200 PE=2 SV=1	S	Function unknown	WAT1-related protein At1g43650 [Glycine max]	cellular component: cell (GO:0005623);; cellular component: membrane (GO:0016020);; cellular component: cell part (GO:0044464);; cellular component: membrane part (GO:0044425);; molecular function: transporter activity (GO:0005215);; biological process: localization (GO:0051179)
gene-LOC100785634	1.0639	1.9947	1.32703	0	0.130182	0.073979	0.00617552	-2.45101	down	[T]	Signal transduction mechanisms	Molecular Function: transmembrane receptor protein serine/threonine kinase activity (GO:0004675);; Molecular Function: ATP binding (GO:0005524);; Cellular Component: plasma membrane (GO:0005886);; Biological Process: protein phosphorylation (GO:0006468);; Cellular Component: integral component of membrane (GO:0016021);;	K13430|3.2e-59|cann:107860794|K13430 serine/threonine-protein kinase PBS1 [EC:2.7.11.1] | (RefSeq) serine/threonine-protein kinase CDL1	Plant-pathogen interaction (ko04626)	[T]	Signal transduction mechanisms	Protein tyrosine and serine/threonine kinase	Calcium/calmodulin-regulated receptor-like kinase 1 OS=Arabidopsis thaliana OX=3702 GN=CRLK1 PE=1 SV=1	T	Signal transduction mechanisms	calcium/calmodulin-regulated receptor-like kinase 1 [Glycine max]	molecular function: catalytic activity (GO:0003824);; molecular function: signal transducer activity (GO:0004871);; molecular function: molecular transducer activity (GO:0060089);; biological process: metabolic process (GO:0008152);; biological process: cellular process (GO:0009987);; biological process: signaling (GO:0023052);; biological process: single-organism process (GO:0044699);; biologica…
gene-LOC100818043	20.9439	16.9803	20.8309	2.7757	2.39627	2.05823	1.61e-10	-1.54244	down	[P]	Inorganic ion transport and metabolism	Molecular Function: ATP binding (GO:0005524);; Cellular Component: plasma membrane (GO:0005886);; Molecular Function: hydrogen-exporting ATPase activity, phosphorylative mechanism (GO:0008553);; Cellular Component: integral component of membrane (GO:0016021);; Molecular Function: hydrolase activity (GO:0016787);; Biological Process: hydrogen ion export across plasma membrane (GO:0120029);;	K01535|0.0e+00|gmx:100818043|K01535 H+-transporting ATPase [EC:7.1.2.1] | (RefSeq) ATPase 11, plasma membrane-type	Oxidative phosphorylation (ko00190)	[P]	Inorganic ion transport and metabolism	E1-E2 ATPase	ATPase 11, plasma membrane-type OS=Arabidopsis thaliana OX=3702 GN=AHA11 PE=1 SV=1	P	Inorganic ion transport and metabolism	ATPase 11, plasma membrane-type [Glycine max]	molecular function: binding (GO:0005488);; cellular component: cell (GO:0005623);; cellular component: membrane (GO:0016020);; cellular component: cell part (GO:0044464);; molecular function: catalytic activity (GO:0003824);; molecular function: transporter activity (GO:0005215);; biological process: single-organism process (GO:0044699);; biological process: localization (GO:0051179);; cellular c…
gene-LOC100785742	11.4511	10.1242	11.8394	0.689935	0.580463	0.497954	2.17e-28	-2.76122	down	[R]	General function prediction only	Biological Process: karyogamy (GO:0000741);; Molecular Function: molecular_function (GO:0003674);; Molecular Function: catalytic activity (GO:0003824);; Molecular Function: ubiquitin-protein transferase activity (GO:0004842);; Cellular Component: cellular_component (GO:0005575);; Cellular Component: cell (GO:0005623);; Cellular Component: plasma membrane (GO:0005886);; Cellular Component: cell-ce…	--	--	--	--	von Willebrand factor type A domain	Probable E3 ubiquitin-protein ligase EDA40 OS=Arabidopsis thaliana OX=3702 GN=EDA40 PE=2 SV=1	O	Posttranslational modification, protein turnover, chaperones	probable E3 ubiquitin-protein ligase EDA40 [Glycine max]	biological process: cellular process (GO:0009987);; biological process: cellular component organization or biogenesis (GO:0071840);; molecular function: catalytic activity (GO:0003824);; cellular component: cell (GO:0005623);; cellular component: membrane (GO:0016020);; cellular component: cell part (GO:0044464);; cellular component: cell junction (GO:0030054);; biological process: metabolic proc…
gene-LOC100305427	4.77114	2.35506	4.79019	0.013781	0	0	3.61e-17	-7.21847	down	--		Biological Process: defense response to oomycetes (GO:0002229);; Molecular Function: transmembrane receptor protein serine/threonine kinase activity (GO:0004675);; Molecular Function: ATP binding (GO:0005524);; Cellular Component: plasma membrane (GO:0005886);; Biological Process: defense response (GO:0006952);; Cellular Component: integral component of membrane (GO:0016021);; Molecular Function:…	K01176|3.4e-74|sbi:8065370|K01176 alpha-amylase [EC:3.2.1.1] | (RefSeq) alpha-amylase isozyme 2A	Starch and sucrose metabolism (ko00500)	--	--	Legume lectin domain	L-type lectin-domain containing receptor kinase IX.1 OS=Arabidopsis thaliana OX=3702 GN=LECRK91 PE=1 SV=1	T	Signal transduction mechanisms	lectin-like receptor kinase [Glycine max]	biological process: response to stimulus (GO:0050896);; biological process: multi-organism process (GO:0051704);; molecular function: catalytic activity (GO:0003824);; molecular function: signal transducer activity (GO:0004871);; molecular function: molecular transducer activity (GO:0060089);; biological process: metabolic process (GO:0008152);; biological process: cellular process (GO:0009987);;…
gene-LOC100817565	7.05456	6.75183	6.99838	0.237605	0.372536	0.486214	2.49e-16	-2.73479	down	[T]	Signal transduction mechanisms	Molecular Function: protein serine/threonine kinase activity (GO:0004674);; Molecular Function: ATP binding (GO:0005524);; Cellular Component: nucleus (GO:0005634);; Cellular Component: cytoplasm (GO:0005737);; Cellular Component: plasma membrane (GO:0005886);; Biological Process: protein phosphorylation (GO:0006468);;	K20715|0.0e+00|gmx:100817565|K20715 phototropin [EC:2.7.11.1] | (RefSeq) phototropin-1	--	--	--	Protein kinase domain	Phototropin-1 OS=Arabidopsis thaliana OX=3702 GN=PHOT1 PE=1 SV=1	T	Signal transduction mechanisms	phototropin-1 [Glycine max]	molecular function: catalytic activity (GO:0003824);; biological process: metabolic process (GO:0008152);; biological process: cellular process (GO:0009987);; molecular function: binding (GO:0005488);; cellular component: cell (GO:0005623);; cellular component: organelle (GO:0043226);; cellular component: cell part (GO:0044464);; cellular component: membrane (GO:0016020)
gene-LOC100819674	6.98183	6.3322	7.11673	0.690454	1.26618	0.971054	0.00126465	-1.27079	down	[T]	Signal transduction mechanisms	Molecular Function: transmembrane receptor protein serine/threonine kinase activity (GO:0004675);; Molecular Function: ATP binding (GO:0005524);; Cellular Component: plasma membrane (GO:0005886);; Biological Process: protein phosphorylation (GO:0006468);;	K13430|1.2e-44|egu:105034278|K13430 serine/threonine-protein kinase PBS1 [EC:2.7.11.1] | (RefSeq) serine/threonine-protein kinase PBS1	Plant-pathogen interaction (ko04626)	[T]	Signal transduction mechanisms	Protein kinase domain	Serine/threonine-protein kinase-like protein At3g51990 OS=Arabidopsis thaliana OX=3702 GN=At3g51990 PE=2 SV=1	T	Signal transduction mechanisms	serine/threonine-protein kinase-like protein At3g51990 [Glycine max]	molecular function: catalytic activity (GO:0003824);; molecular function: signal transducer activity (GO:0004871);; molecular function: molecular transducer activity (GO:0060089);; biological process: metabolic process (GO:0008152);; biological process: cellular process (GO:0009987);; biological process: signaling (GO:0023052);; biological process: single-organism process (GO:0044699);; biologica…
gene-LOC100818547	1.88289	1.76447	1.99303	0.016814	0.053801	0	1.03e-11	-4.48151	down	[T]	Signal transduction mechanisms	Biological Process: defense response to oomycetes (GO:0002229);; Molecular Function: transmembrane receptor protein serine/threonine kinase activity (GO:0004675);; Molecular Function: ATP binding (GO:0005524);; Cellular Component: plasma membrane (GO:0005886);; Biological Process: defense response (GO:0006952);; Biological Process: defense response to bacterium (GO:0042742);;	K13416|1.1e-76|mdm:103416333|K13416 brassinosteroid insensitive 1-associated receptor kinase 1 [EC:2.7.10.1 2.7.11.1] | (RefSeq) BRASSINOSTEROID INSENSITIVE 1-associated receptor kinase 1-like isoform X1	MAPK signaling pathway - plant (ko04016);; Plant hormone signal transduction (ko04075);; Plant-pathogen interaction (ko04626)	[T]	Signal transduction mechanisms	Protein kinase domain	Receptor like protein kinase S.2 OS=Arabidopsis thaliana OX=3702 GN=LECRKS2 PE=2 SV=2	T	Signal transduction mechanisms	receptor like protein kinase S.2 [Glycine max]	biological process: response to stimulus (GO:0050896);; biological process: multi-organism process (GO:0051704);; molecular function: catalytic activity (GO:0003824);; molecular function: signal transducer activity (GO:0004871);; molecular function: molecular transducer activity (GO:0060089);; biological process: metabolic process (GO:0008152);; biological process: cellular process (GO:0009987);;…
gene-LOC100802519	0.887237	0.863234	0.485937	0	0	0	5.07e-06	-5.97177	down	[E]	Amino acid transport and metabolism	Cellular Component: plasma membrane (GO:0005886);; Biological Process: amino acid transport (GO:0006865);; Molecular Function: amino acid transmembrane transporter activity (GO:0015171);; Molecular Function: L-lysine transmembrane transporter activity (GO:0015189);; Cellular Component: integral component of membrane (GO:0016021);;	K03294|3.4e-205|egu:105046703|K03294 basic amino acid/polyamine antiporter, APA family | (RefSeq) cationic amino acid transporter 1-like	--	[E]	Amino acid transport and metabolism	Amino acid permease	Cationic amino acid transporter 5 OS=Arabidopsis thaliana OX=3702 GN=CAT5 PE=1 SV=1	E	Amino acid transport and metabolism	cationic amino acid transporter 5 [Glycine max]	cellular component: cell (GO:0005623);; cellular component: membrane (GO:0016020);; cellular component: cell part (GO:0044464);; biological process: single-organism process (GO:0044699);; biological process: localization (GO:0051179);; molecular function: transporter activity (GO:0005215);; cellular component: membrane part (GO:0044425)
--	0.828752	0.747743	1.06358	0.857959	0.820198	0.82353	0.000269212	1.36262	up	--	--	Molecular Function: protein binding (GO:0005515);; Cellular Component: cellular_component (GO:0005575);; Cellular Component: intracellular (GO:0005622);; Cellular Component: cell (GO:0005623);; Cellular Component: cytoplasm (GO:0005737);; Cellular Component: cytosol (GO:0005829);; Cellular Component: cytoskeleton (GO:0005856);; Cellular Component: microtubule associated complex (GO:0005875);; Cel…	--	--	--	--	IQ calmodulin-binding motif	--	S	Function unknown	hypothetical protein GLYMA_07G124900 [Glycine max]	molecular function: binding (GO:0005488);; cellular component: cell (GO:0005623);; cellular component: cell part (GO:0044464);; cellular component: organelle (GO:0043226);; cellular component: macromolecular complex (GO:0032991);; cellular component: organelle part (GO:0044422);; cellular component: membrane (GO:0016020)
gene-LOC100780323	55.4329	89.7156	53.1482	8.32128	7.6276	8.16849	5.64e-07	-1.57599	down	[M]	Cell wall/membrane/envelope biogenesis	Molecular Function: transmembrane receptor protein serine/threonine kinase activity (GO:0004675);; Molecular Function: ATP binding (GO:0005524);; Cellular Component: plasma membrane (GO:0005886);; Biological Process: protein phosphorylation (GO:0006468);; Cellular Component: integral component of membrane (GO:0016021);;	K13436|2.4e-67|thj:104802299|K13436 pto-interacting protein 1 [EC:2.7.11.1] | (RefSeq) PTI1-like tyrosine-protein kinase 3 isoform X1	Plant-pathogen interaction (ko04626)	--	--	Protein tyrosine and serine/threonine kinase	Protein STRUBBELIG-RECEPTOR FAMILY 6 OS=Arabidopsis thaliana OX=3702 GN=SRF6 PE=1 SV=1	T	Signal transduction mechanisms	protein STRUBBELIG-RECEPTOR FAMILY 6 [Glycine max]	molecular function: catalytic activity (GO:0003824);; molecular function: signal transducer activity (GO:0004871);; molecular function: molecular transducer activity (GO:0060089);; biological process: metabolic process (GO:0008152);; biological process: cellular process (GO:0009987);; biological process: signaling (GO:0023052);; biological process: single-organism process (GO:0044699);; biologica…
gene-LOC100812250	4.85494	4.1428	4.82166	6.0314	8.2844	4.20088	4.09e-07	1.91404	up	--	--	Cellular Component: 1,3-beta-D-glucan synthase complex (GO:0000148);; Molecular Function: 1,3-beta-D-glucan synthase activity (GO:0003843);; Cellular Component: plasma membrane (GO:0005886);; Biological Process: (1->3)-beta-D-glucan biosynthetic process (GO:0006075);; Cellular Component: integral component of membrane (GO:0016021);; Molecular Function: glucosyltransferase activity (GO:0046527);;	K11000|0.0e+00|gmx:100812250|K11000 callose synthase [EC:2.4.1.-] | (RefSeq) callose synthase 11	--	[M]	Cell wall/membrane/envelope biogenesis	1,3-beta-glucan synthase component	Callose synthase 11 OS=Arabidopsis thaliana OX=3702 GN=CALS11 PE=2 SV=1	M	Cell wall/membrane/envelope biogenesis	callose synthase 11 [Glycine max]	cellular component: cell (GO:0005623);; cellular component: membrane (GO:0016020);; cellular component: macromolecular complex (GO:0032991);; cellular component: membrane part (GO:0044425);; cellular component: cell part (GO:0044464);; molecular function: catalytic activity (GO:0003824);; biological process: metabolic process (GO:0008152);; biological process: cellular process (GO:0009987);; biol…
gene-LOC100811653	2.21634	1.67837	2.48649	2.24938	2.07497	0.955723	0.00687781	1.20038	up	[M]	Cell wall/membrane/envelope biogenesis	Molecular Function: protein serine/threonine kinase activity (GO:0004674);; Molecular Function: ATP binding (GO:0005524);; Cellular Component: plasma membrane (GO:0005886);; Biological Process: hormone-mediated signaling pathway (GO:0009755);; Cellular Component: integral component of membrane (GO:0016021);; Molecular Function: receptor serine/threonine kinase binding (GO:0033612);;	K20718|3.9e-286|gmx:100811653|K20718 LRR receptor-like serine/threonine-protein kinase ERECTA [EC:2.7.11.1] | (RefSeq) LRR receptor-like serine/threonine-protein kinase ERL1 isoform X1	MAPK signaling pathway - plant (ko04016)	--	--	Protein kinase domain	LRR receptor-like serine/threonine-protein kinase ERL1 OS=Arabidopsis thaliana OX=3702 GN=ERL1 PE=1 SV=1	T	Signal transduction mechanisms	LRR receptor-like serine/threonine-protein kinase ERL1 isoform X1 [Glycine max]	molecular function: catalytic activity (GO:0003824);; biological process: metabolic process (GO:0008152);; biological process: cellular process (GO:0009987);; molecular function: binding (GO:0005488);; cellular component: cell (GO:0005623);; cellular component: membrane (GO:0016020);; cellular component: cell part (GO:0044464);; biological process: signaling (GO:0023052);; biological process: sin…
gene-LOC100786411	22.3359	21.1233	24.1895	2.55413	2.09475	2.0445	1.43e-18	-1.86808	down	[G]	Carbohydrate transport and metabolism	Cellular Component: vacuole (GO:0005773);; Cellular Component: plasma membrane (GO:0005886);; Cellular Component: integral component of plasma membrane (GO:0005887);; Molecular Function: sucrose:proton symporter activity (GO:0008506);; Cellular Component: membrane (GO:0016020);;	K15378|4.2e-292|gmx:100786411|K15378 solute carrier family 45, member 1/2/4 | (RefSeq) sucrose transport protein SUC8	--	[G]	Carbohydrate transport and metabolism	MFS/sugar transport protein	Sucrose transport protein SUC1 OS=Arabidopsis thaliana OX=3702 GN=SUC1 PE=1 SV=1	G	Carbohydrate transport and metabolism	sucrose transport protein SUC8 [Glycine max]	cellular component: cell (GO:0005623);; cellular component: organelle (GO:0043226);; cellular component: cell part (GO:0044464);; cellular component: membrane (GO:0016020);; cellular component: membrane part (GO:0044425);; molecular function: transporter activity (GO:0005215);; biological process: single-organism process (GO:0044699);; biological process: localization (GO:0051179)
gene-LOC100788560	7.80168	6.76792	8.12203	9.12785	11.1395	5.98386	2.18e-06	1.69835	up	[J]	Translation, ribosomal structure and biogenesis	Biological Process: tRNA wobble adenosine to inosine editing (GO:0002100);; Cellular Component: plasma membrane (GO:0005886);; Cellular Component: chloroplast (GO:0009507);; Molecular Function: tRNA-specific adenosine-34 deaminase activity (GO:0052717);; Cellular Component: tRNA-specific adenosine-34 deaminase complex (GO:0052718);;	K11991|0.0e+00|gmx:100788560|K11991 tRNA(adenine34) deaminase [EC:3.5.4.33] | (RefSeq) tRNA(adenine(34)) deaminase, chloroplastic	--	[F]	Nucleotide transport and metabolism	Cytidine and deoxycytidylate deaminase zinc-binding region	tRNA(adenine(34)) deaminase, chloroplastic OS=Arabidopsis thaliana OX=3702 GN=TADA PE=1 SV=1	F	Nucleotide transport and metabolism	tRNA(adenine(34)) deaminase, chloroplastic [Glycine max]	biological process: metabolic process (GO:0008152);; biological process: cellular process (GO:0009987);; cellular component: cell (GO:0005623);; cellular component: membrane (GO:0016020);; cellular component: cell part (GO:0044464);; cellular component: organelle (GO:0043226);; molecular function: catalytic activity (GO:0003824);; cellular component: macromolecular complex (GO:0032991)
gene-LOC100815148	0.839029	0.732994	0.220644	19.565	3.92005	13.6156	1.15e-20	5.47962	up	--	--	Cellular Component: plasma membrane (GO:0005886);;	--	--	--	--	--	--	--	--	uncharacterized protein LOC100815148 [Glycine max]	cellular component: cell (GO:0005623);; cellular component: membrane (GO:0016020);; cellular component: cell part (GO:0044464)
gene-LOC100813918	8.24533	7.34323	7.90612	6.1956	6.32411	5.51894	1.71e-05	1.08926	up	--		Molecular Function: transmembrane receptor protein serine/threonine kinase activity (GO:0004675);; Molecular Function: receptor binding (GO:0005102);; Molecular Function: ATP binding (GO:0005524);; Cellular Component: plasma membrane (GO:0005886);; Biological Process: protein phosphorylation (GO:0006468);; Cellular Component: integral component of membrane (GO:0016021);;	K13418|6.0e-301|gmx:100813918|K13418 somatic embryogenesis receptor kinase 1 [EC:2.7.10.1 2.7.11.1] | (RefSeq) somatic embryogenesis receptor kinase 2	--	--	--	Protein kinase domain	Somatic embryogenesis receptor kinase 1 OS=Arabidopsis thaliana OX=3702 GN=SERK1 PE=1 SV=2	T	Signal transduction mechanisms	somatic embryogenesis receptor kinase 2 [Glycine max]	molecular function: catalytic activity (GO:0003824);; molecular function: signal transducer activity (GO:0004871);; molecular function: molecular transducer activity (GO:0060089);; biological process: metabolic process (GO:0008152);; biological process: cellular process (GO:0009987);; biological process: signaling (GO:0023052);; biological process: single-organism process (GO:0044699);; biologica…
gene-LOC100816638	2.04173	4.70477	3.57238	0.313468	0	0.338331	0.00422924	-2.37278	down	--	--	Cellular Component: cellular_component (GO:0005575);; Cellular Component: intracellular (GO:0005622);; Cellular Component: cell (GO:0005623);; Cellular Component: cytoplasm (GO:0005737);; Cellular Component: plasma membrane (GO:0005886);; Biological Process: transport (GO:0006810);; Biological Process: biological_process (GO:0008150);; Biological Process: response to external stimulus (GO:0009605…	--	--	--	--	--	--	O	Posttranslational modification, protein turnover, chaperones	inactive protein RESTRICTED TEV MOVEMENT 2 [Glycine max]	cellular component: cell (GO:0005623);; cellular component: cell part (GO:0044464);; cellular component: membrane (GO:0016020);; biological process: localization (GO:0051179);; biological process: response to stimulus (GO:0050896);; biological process: multi-organism process (GO:0051704);; biological process: locomotion (GO:0040011)
gene-LOC100797039	5.27581	3.21984	4.07693	0.154656	0.143767	0.243302	4.79e-19	-3.03343	down	[P]	Inorganic ion transport and metabolism	Molecular Function: magnesium ion binding (GO:0000287);; Molecular Function: ATP binding (GO:0005524);; Cellular Component: plasma membrane (GO:0005886);; Cellular Component: integral component of membrane (GO:0016021);; Biological Process: phospholipid translocation (GO:0045332);;	K01530|0.0e+00|gmx:100797039|K01530 phospholipid-translocating ATPase [EC:7.6.2.1] | (RefSeq) putative phospholipid-transporting ATPase 9	--	[R]	General function prediction only	Phospholipid-translocating P-type ATPase C-terminal	Putative phospholipid-transporting ATPase 9 OS=Arabidopsis thaliana OX=3702 GN=ALA9 PE=3 SV=1	P	Inorganic ion transport and metabolism	putative phospholipid-transporting ATPase 9 [Glycine max]	molecular function: binding (GO:0005488);; cellular component: cell (GO:0005623);; cellular component: membrane (GO:0016020);; cellular component: cell part (GO:0044464);; cellular component: membrane part (GO:0044425);; biological process: cellular process (GO:0009987);; biological process: single-organism process (GO:0044699);; biological process: localization (GO:0051179);; biological process:…
gene-LOC100799074	9.36614	10.8283	9.76984	1.44019	0.8737	1.48471	4.83e-10	-1.53378	down	--	--	Molecular Function: calcium-dependent phospholipid binding (GO:0005544);; Cellular Component: plasma membrane (GO:0005886);; Biological Process: negative regulation of cell death (GO:0060548);; Biological Process: cellular response to calcium ion (GO:0071277);;	K16280|1.9e-22|zju:107428456|K16280 E3 ubiquitin-protein ligase RGLG [EC:2.3.2.27] | (RefSeq) E3 ubiquitin-protein ligase RGLG2 isoform X1	--	[T]	Signal transduction mechanisms	Copine	Protein BONZAI 1 OS=Arabidopsis thaliana OX=3702 GN=BON1 PE=1 SV=2	T	Signal transduction mechanisms	protein BONZAI 1 [Glycine max]	molecular function: binding (GO:0005488);; cellular component: cell (GO:0005623);; cellular component: membrane (GO:0016020);; cellular component: cell part (GO:0044464);; biological process: biological regulation (GO:0065007);; biological process: cellular process (GO:0009987);; biological process: response to stimulus (GO:0050896)
gene-LOC100810120	0	0.025836	0.380494	18.9595	10.0201	26.0453	1.92e-07	6.59227	up	--	--	Cellular Component: plasma membrane (GO:0005886);; Cellular Component: integral component of membrane (GO:0016021);; Molecular Function: transmembrane transporter activity (GO:0022857);;	K17500|1.7e-46|nta:107765414|K17500 integrin-linked kinase-associated serine/threonine phosphatase 2C [EC:3.1.3.16] | (RefSeq) WAT1-related protein At3g18200-like	--	--	--	EamA-like transporter family	WAT1-related protein At1g68170 OS=Arabidopsis thaliana OX=3702 GN=At1g68170 PE=3 SV=1	S	Function unknown	WAT1-related protein At1g68170 [Glycine max]	cellular component: cell (GO:0005623);; cellular component: membrane (GO:0016020);; cellular component: cell part (GO:0044464);; cellular component: membrane part (GO:0044425);; molecular function: transporter activity (GO:0005215);; biological process: localization (GO:0051179)
gene-LOC100499686	122.703	159.628	126.523	6.96428	5.31653	16.3734	2.42e-09	-2.38865	down	--	--	Cellular Component: cellular_component (GO:0005575);; Cellular Component: cell (GO:0005623);; Cellular Component: plasma membrane (GO:0005886);; Cellular Component: membrane (GO:0016020);; Cellular Component: intrinsic component of membrane (GO:0031224);; Cellular Component: anchored component of membrane (GO:0031225);; Cellular Component: intrinsic component of plasma membrane (GO:0031226);; Cel…	--	--	--	--	Fasciclin domain	Fasciclin-like arabinogalactan protein 7 OS=Arabidopsis thaliana OX=3702 GN=FLA7 PE=2 SV=1	S	Function unknown	uncharacterized protein LOC100499686 precursor [Glycine max]	cellular component: cell (GO:0005623);; cellular component: membrane (GO:0016020);; cellular component: cell part (GO:0044464);; cellular component: membrane part (GO:0044425)
gene-LOC100807382	0.628233	1.01003	0.756277	0	0.017325	0	4.32e-06	-4.62818	down	[E]	Amino acid transport and metabolism	Cellular Component: plasma membrane (GO:0005886);; Cellular Component: integral component of membrane (GO:0016021);; Molecular Function: transmembrane transporter activity (GO:0022857);;	K14638|8.4e-135|cmax:111493070|K14638 solute carrier family 15 (peptide/histidine transporter), member 3/4 | (RefSeq) protein NRT1/ PTR FAMILY 2.13-like	--	[E]	Amino acid transport and metabolism	POT family	Protein NRT1/ PTR FAMILY 2.10 OS=Arabidopsis thaliana OX=3702 GN=NPF2.10 PE=1 SV=3	E	Amino acid transport and metabolism	protein NRT1/ PTR FAMILY 2.10 [Glycine max]	cellular component: cell (GO:0005623);; cellular component: membrane (GO:0016020);; cellular component: cell part (GO:0044464);; cellular component: membrane part (GO:0044425);; molecular function: transporter activity (GO:0005215);; biological process: localization (GO:0051179)
gene-LOC100784861	0.430818	0.29826	0.531955	0.573338	1.05652	1.40124	3.69e-08	2.6828	up	[P]	Inorganic ion transport and metabolism	Cellular Component: plasma membrane (GO:0005886);; Biological Process: potassium ion transport (GO:0006813);; Molecular Function: potassium ion transmembrane transporter activity (GO:0015079);; Cellular Component: membrane (GO:0016020);; Cellular Component: integral component of membrane (GO:0016021);;	K03549|0.0e+00|gmx:100784861|K03549 KUP system potassium uptake protein | (RefSeq) potassium transporter 6	--	--	--	K+ potassium transporter	Potassium transporter 6 OS=Arabidopsis thaliana OX=3702 GN=POT6 PE=2 SV=1	P	Inorganic ion transport and metabolism	potassium transporter 6 [Glycine max]	cellular component: cell (GO:0005623);; cellular component: membrane (GO:0016020);; cellular component: cell part (GO:0044464);; biological process: localization (GO:0051179);; molecular function: transporter activity (GO:0005215);; cellular component: membrane part (GO:0044425)
gene-LOC100792960	1.38736	1.1472	1.12341	0.143578	0.142365	0.132282	6.04e-06	-1.58831	down	[P]	Inorganic ion transport and metabolism	Molecular Function: magnesium ion binding (GO:0000287);; Molecular Function: ATP binding (GO:0005524);; Cellular Component: plasma membrane (GO:0005886);; Cellular Component: integral component of membrane (GO:0016021);; Biological Process: phospholipid translocation (GO:0045332);;	K01530|0.0e+00|gmx:100792960|K01530 phospholipid-translocating ATPase [EC:7.6.2.1] | (RefSeq) putative phospholipid-transporting ATPase 9	--	[R]	General function prediction only	Phospholipid-translocating P-type ATPase C-terminal	Putative phospholipid-transporting ATPase 9 OS=Arabidopsis thaliana OX=3702 GN=ALA9 PE=3 SV=1	P	Inorganic ion transport and metabolism	putative phospholipid-transporting ATPase 9 [Glycine max]	molecular function: binding (GO:0005488);; cellular component: cell (GO:0005623);; cellular component: membrane (GO:0016020);; cellular component: cell part (GO:0044464);; cellular component: membrane part (GO:0044425);; biological process: cellular process (GO:0009987);; biological process: single-organism process (GO:0044699);; biological process: localization (GO:0051179);; biological process:…
gene-LOC100816663	24.7974	41.9933	25.6943	1.2637	1.42162	1.18177	1.4e-19	-3.20285	down	--	--	Cellular Component: cellular_component (GO:0005575);; Cellular Component: intracellular (GO:0005622);; Cellular Component: cell (GO:0005623);; Cellular Component: nucleus (GO:0005634);; Cellular Component: plasma membrane (GO:0005886);; Biological Process: biological_process (GO:0008150);; Biological Process: regulation of hormone levels (GO:0010817);; Cellular Component: membrane (GO:0016020);; …	K03231|3.4e-41|mtr:MTR_8g008740|K03231 elongation factor 1-alpha | (RefSeq) elongation factor 1-alpha	RNA transport (ko03013)	--	--	--	Interactor of constitutive active ROPs 4 OS=Arabidopsis thaliana OX=3702 GN=ICR4 PE=1 SV=2	S	Function unknown	interactor of constitutive active ROPs 4 [Glycine max]	cellular component: cell (GO:0005623);; cellular component: cell part (GO:0044464);; cellular component: organelle (GO:0043226);; cellular component: membrane (GO:0016020);; biological process: biological regulation (GO:0065007)
gene-LOC100784155	3.13974	2.02386	2.29332	0.084752	0.015099	0.034085	3.68e-14	-4.04381	down	[M]	Cell wall/membrane/envelope biogenesis	Molecular Function: transmembrane receptor protein serine/threonine kinase activity (GO:0004675);; Molecular Function: ATP binding (GO:0005524);; Cellular Component: plasma membrane (GO:0005886);; Biological Process: protein phosphorylation (GO:0006468);; Cellular Component: integral component of membrane (GO:0016021);;	K13416|2.4e-40|hbr:110670163|K13416 brassinosteroid insensitive 1-associated receptor kinase 1 [EC:2.7.10.1 2.7.11.1] | (RefSeq) BRASSINOSTEROID INSENSITIVE 1-associated receptor kinase 1-like	MAPK signaling pathway - plant (ko04016);; Plant hormone signal transduction (ko04075);; Plant-pathogen interaction (ko04626)	--	--	Protein tyrosine and serine/threonine kinase	Probable LRR receptor-like serine/threonine-protein kinase IRK OS=Arabidopsis thaliana OX=3702 GN=IRK PE=1 SV=1	T	Signal transduction mechanisms	protein NSP-INTERACTING KINASE 2 [Glycine max]	molecular function: catalytic activity (GO:0003824);; molecular function: signal transducer activity (GO:0004871);; molecular function: molecular transducer activity (GO:0060089);; biological process: metabolic process (GO:0008152);; biological process: cellular process (GO:0009987);; biological process: signaling (GO:0023052);; biological process: single-organism process (GO:0044699);; biologica…
gene-LOC100499640	6.78935	13.721	7.22252	0.592193	0.754887	1.0244	3.06e-06	-2.05403	down	[T]	Signal transduction mechanisms	Molecular Function: protein kinase activity (GO:0004672);; Molecular Function: ATP binding (GO:0005524);; Cellular Component: plasma membrane (GO:0005886);; Cellular Component: plasmodesma (GO:0009506);; Cellular Component: integral component of membrane (GO:0016021);; Biological Process: protein autophosphorylation (GO:0046777);;	K13435|6.3e-89|sly:101268866|K13435 serine/threonine-protein kinase Pto | (RefSeq) Pto; serine/threonine protein kinase Pto	Plant-pathogen interaction (ko04626)	[T]	Signal transduction mechanisms	Protein tyrosine and serine/threonine kinase	Receptor-like protein kinase FERONIA OS=Arabidopsis thaliana OX=3702 GN=FER PE=1 SV=1	T	Signal transduction mechanisms	hypothetical protein GLYMA_13G054400 [Glycine max]	molecular function: catalytic activity (GO:0003824);; biological process: metabolic process (GO:0008152);; biological process: cellular process (GO:0009987);; molecular function: binding (GO:0005488);; cellular component: cell (GO:0005623);; cellular component: membrane (GO:0016020);; cellular component: cell part (GO:0044464);; cellular component: cell junction (GO:0030054);; cellular component:…
gene-LOC112998761	0.091656	0.297987	0.171435	1.19752	0.923684	0.998381	2.62e-13	3.62622	up	[T]	Signal transduction mechanisms	Molecular Function: RNA binding (GO:0003723);; Molecular Function: ATP binding (GO:0005524);; Cellular Component: plasma membrane (GO:0005886);; Cellular Component: integral component of membrane (GO:0016021);; Molecular Function: ATPase activity (GO:0016887);; Molecular Function: ATPase activity, coupled to transmembrane movement of substances (GO:0042626);; Biological Process: transmembrane tra…	K05681|1.2e-54|cme:CYME_CMS467C|K05681 ATP-binding cassette, subfamily G (WHITE), member 2 | (RefSeq) ATP-binding cassette, sub-family G, member 2	ABC transporters (ko02010)	[Q]	Secondary metabolites biosynthesis, transport and catabolism	ABC transporter	ABC transporter G family member 11 OS=Arabidopsis thaliana OX=3702 GN=ABCG11 PE=1 SV=1	Q	Secondary metabolites biosynthesis, transport and catabolism	ABC transporter G family member 11-like isoform X3 [Glycine max]	molecular function: binding (GO:0005488);; cellular component: cell (GO:0005623);; cellular component: membrane (GO:0016020);; cellular component: cell part (GO:0044464);; cellular component: membrane part (GO:0044425);; molecular function: catalytic activity (GO:0003824);; molecular function: transporter activity (GO:0005215);; biological process: localization (GO:0051179)
gene-LOC100790042	6.03649	3.70266	5.20602	7.20851	4.75366	4.47228	1.06e-06	1.57324	up	--	--	Cellular Component: plasma membrane (GO:0005886);; Cellular Component: integral component of membrane (GO:0016021);;	--	--	--	--	Domain of unknown function (DUF588)	CASP-like protein 2A2 OS=Glycine max OX=3847 PE=2 SV=1	S	Function unknown	CASP-like protein 2A2 [Glycine max]	cellular component: cell (GO:0005623);; cellular component: membrane (GO:0016020);; cellular component: cell part (GO:0044464);; cellular component: membrane part (GO:0044425)
gene-LOC100804708	0.881545	1.10493	1.04665	0	0	0	1.14e-07	-6.60838	down	--		Molecular Function: transmembrane receptor protein serine/threonine kinase activity (GO:0004675);; Molecular Function: receptor binding (GO:0005102);; Molecular Function: ATP binding (GO:0005524);; Cellular Component: plasma membrane (GO:0005886);; Biological Process: protein phosphorylation (GO:0006468);; Cellular Component: integral component of membrane (GO:0016021);;	K13416|6.3e-303|gmx:100804708|K13416 brassinosteroid insensitive 1-associated receptor kinase 1 [EC:2.7.10.1 2.7.11.1] | (RefSeq) BRASSINOSTEROID INSENSITIVE 1-associated receptor kinase 1	MAPK signaling pathway - plant (ko04016);; Plant hormone signal transduction (ko04075);; Plant-pathogen interaction (ko04626)	--	--	Protein kinase domain	BRASSINOSTEROID INSENSITIVE 1-associated receptor kinase 1 OS=Arabidopsis thaliana OX=3702 GN=BAK1 PE=1 SV=2	T	Signal transduction mechanisms	BRASSINOSTEROID INSENSITIVE 1-associated receptor kinase 1 [Glycine max]	molecular function: catalytic activity (GO:0003824);; molecular function: signal transducer activity (GO:0004871);; molecular function: molecular transducer activity (GO:0060089);; biological process: metabolic process (GO:0008152);; biological process: cellular process (GO:0009987);; biological process: signaling (GO:0023052);; biological process: single-organism process (GO:0044699);; biologica…
gene-LOC100775318	3.05382	3.61745	2.85076	0.112151	0.111405	0.05695	1.88e-16	-3.47606	down	[M]	Cell wall/membrane/envelope biogenesis	Molecular Function: transmembrane receptor protein serine/threonine kinase activity (GO:0004675);; Molecular Function: ATP binding (GO:0005524);; Cellular Component: plasma membrane (GO:0005886);; Biological Process: protein phosphorylation (GO:0006468);; Cellular Component: integral component of membrane (GO:0016021);;	K13430|4.1e-86|cann:107847575|K13430 serine/threonine-protein kinase PBS1 [EC:2.7.11.1] | (RefSeq) serine/threonine-protein kinase PBS1	Plant-pathogen interaction (ko04626)	[T]	Signal transduction mechanisms	Protein tyrosine and serine/threonine kinase	Receptor-like serine/threonine-protein kinase ALE2 OS=Arabidopsis thaliana OX=3702 GN=ALE2 PE=1 SV=1	T	Signal transduction mechanisms	receptor-like serine/threonine-protein kinase ALE2 isoform X1 [Glycine max]	molecular function: catalytic activity (GO:0003824);; molecular function: signal transducer activity (GO:0004871);; molecular function: molecular transducer activity (GO:0060089);; biological process: metabolic process (GO:0008152);; biological process: cellular process (GO:0009987);; biological process: signaling (GO:0023052);; biological process: single-organism process (GO:0044699);; biologica…
gene-LOC102668139	4.82103	2.13598	3.73962	8.59582	5.32982	5.11298	1.04e-09	2.253	up	--	--	Cellular Component: plasma membrane (GO:0005886);; Cellular Component: integral component of membrane (GO:0016021);; Molecular Function: transmembrane transporter activity (GO:0022857);;	--	--	--	--	--	WAT1-related protein At3g28050 OS=Arabidopsis thaliana OX=3702 GN=At3g28050 PE=2 SV=1	S	Function unknown	uncharacterized protein LOC102668139 isoform X1 [Glycine max]	cellular component: cell (GO:0005623);; cellular component: membrane (GO:0016020);; cellular component: cell part (GO:0044464);; cellular component: membrane part (GO:0044425);; molecular function: transporter activity (GO:0005215);; biological process: localization (GO:0051179)
gene-LOC100813994	132.564	189.968	136.619	8.97529	10.0881	7.73128	2.32e-16	-2.59409	down	--	--	Biological Process: reproduction (GO:0000003);; Biological Process: developmental process involved in reproduction (GO:0003006);; Cellular Component: cellular_component (GO:0005575);; Cellular Component: cell (GO:0005623);; Cellular Component: plasma membrane (GO:0005886);; Biological Process: cell cycle (GO:0007049);; Biological Process: multicellular organism development (GO:0007275);; Biologic…	--	--	--	--	--	Lysine-rich arabinogalactan protein 18 OS=Arabidopsis thaliana OX=3702 GN=AGP18 PE=2 SV=1	S	Function unknown	lysine-rich arabinogalactan protein 18 [Glycine max]	biological process: reproduction (GO:0000003);; biological process: reproductive process (GO:0022414);; biological process: developmental process (GO:0032502);; cellular component: cell (GO:0005623);; cellular component: membrane (GO:0016020);; cellular component: cell part (GO:0044464);; biological process: cellular process (GO:0009987);; biological process: single-organism process (GO:0044699);…
gene-LOC100789223	13.17	11.4538	14.6157	12.4915	15.1001	9.90506	6.6e-06	1.42935	up	--	--	Biological Process: microtubule cytoskeleton organization (GO:0000226);; Biological Process: cell morphogenesis (GO:0000902);; Biological Process: cell morphogenesis involved in differentiation (GO:0000904);; Molecular Function: molecular_function (GO:0003674);; Molecular Function: binding (GO:0005488);; Molecular Function: protein binding (GO:0005515);; Cellular Component: cellular_component (GO…	--	--	--	--	Filament-like plant protein, long coiled-coil	Filament-like plant protein 4 OS=Arabidopsis thaliana OX=3702 GN=FPP4 PE=1 SV=1	S	Function unknown	filament-like plant protein 4 [Glycine max]	biological process: cellular process (GO:0009987);; biological process: cellular component organization or biogenesis (GO:0071840);; biological process: developmental process (GO:0032502);; biological process: single-organism process (GO:0044699);; molecular function: binding (GO:0005488);; cellular component: cell (GO:0005623);; cellular component: membrane (GO:0016020);; cellular component: cel…
gene-LOC106794215	1.19268	0.693958	1.17491	0	0.024917	0	3.43e-08	-4.68776	down	[M]	Cell wall/membrane/envelope biogenesis	Molecular Function: protein kinase activity (GO:0004672);; Molecular Function: ATP binding (GO:0005524);; Cellular Component: plasma membrane (GO:0005886);; Biological Process: hormone-mediated signaling pathway (GO:0009755);; Cellular Component: integral component of membrane (GO:0016021);;	K13415|6.1e-84|han:110929858|K13415 protein brassinosteroid insensitive 1 [EC:2.7.10.1 2.7.11.1] | (RefSeq) systemin receptor SR160-like	Plant hormone signal transduction (ko04075)	--	--	Leucine rich repeat	MDIS1-interacting receptor like kinase 2 OS=Arabidopsis thaliana OX=3702 GN=MIK2 PE=1 SV=3	T	Signal transduction mechanisms	MDIS1-interacting receptor like kinase 2 [Glycine max]	molecular function: catalytic activity (GO:0003824);; biological process: metabolic process (GO:0008152);; biological process: cellular process (GO:0009987);; molecular function: binding (GO:0005488);; cellular component: cell (GO:0005623);; cellular component: membrane (GO:0016020);; cellular component: cell part (GO:0044464);; biological process: signaling (GO:0023052);; biological process: sin…
gene-LOC100811644	33.6447	20.2885	34.6168	0.270441	0.07798	0.464403	1.27e-34	-5.176	down	[G]	Carbohydrate transport and metabolism	Cellular Component: plasma membrane (GO:0005886);; Cellular Component: plant-type vacuole membrane (GO:0009705);; Cellular Component: integral component of membrane (GO:0016021);; Molecular Function: potassium ion antiporter activity (GO:0022821);; Biological Process: regulation of stomatal closure (GO:0090333);;	K12818|3.0e-82|smo:SELMODRAFT_429199|K12818 ATP-dependent RNA helicase DHX8/PRP22 [EC:3.6.4.13] | (RefSeq) hypothetical protein	Spliceosome (ko03040)	[R]	General function prediction only	Major Facilitator Superfamily	Protein ZINC INDUCED FACILITATOR-LIKE 1 OS=Arabidopsis thaliana OX=3702 GN=ZIFL1 PE=2 SV=1	S	Function unknown	protein ZINC INDUCED FACILITATOR-LIKE 1 isoform X1 [Glycine max]	cellular component: cell (GO:0005623);; cellular component: membrane (GO:0016020);; cellular component: cell part (GO:0044464);; cellular component: organelle (GO:0043226);; cellular component: organelle part (GO:0044422);; cellular component: membrane part (GO:0044425);; molecular function: transporter activity (GO:0005215);; biological process: cellular process (GO:0009987);; biological process…
gene-LOC100779554	0.66106	0.927917	0.900889	0.098331	0.028883	0.023679	0.000114294	-2.46759	down	[T]	Signal transduction mechanisms	Molecular Function: protein serine/threonine kinase activity (GO:0004674);; Molecular Function: ATP binding (GO:0005524);; Cellular Component: plasma membrane (GO:0005886);; Cellular Component: integral component of membrane (GO:0016021);;	K00924|2.6e-88|lang:109334483|K00924 kinase [EC:2.7.1.-] | (RefSeq) receptor-like protein kinase HSL1	--	--	--	Protein kinase domain	Receptor-like protein kinase 7 OS=Arabidopsis thaliana OX=3702 GN=RLK7 PE=1 SV=1	T	Signal transduction mechanisms	receptor-like protein kinase 7 [Glycine max]	molecular function: catalytic activity (GO:0003824);; biological process: metabolic process (GO:0008152);; biological process: cellular process (GO:0009987);; molecular function: binding (GO:0005488);; cellular component: cell (GO:0005623);; cellular component: membrane (GO:0016020);; cellular component: cell part (GO:0044464);; cellular component: membrane part (GO:0044425)
gene-LOC100802259	1.61353	1.22709	1.37795	2.08139	2.25907	1.62919	1.67e-09	1.96459	up	[T]	Signal transduction mechanisms	Molecular Function: transmembrane receptor protein serine/threonine kinase activity (GO:0004675);; Molecular Function: ATP binding (GO:0005524);; Cellular Component: plasma membrane (GO:0005886);; Biological Process: protein phosphorylation (GO:0006468);; Cellular Component: integral component of membrane (GO:0016021);;	K13430|7.6e-48|mdm:103421442|K13430 serine/threonine-protein kinase PBS1 [EC:2.7.11.1] | (RefSeq) probable serine/threonine-protein kinase PBL7 isoform X2	Plant-pathogen interaction (ko04626)	--	--	Protein tyrosine and serine/threonine kinase	Serine/threonine-protein kinase-like protein CCR1 OS=Arabidopsis thaliana OX=3702 GN=CCR1 PE=1 SV=1	T	Signal transduction mechanisms	serine/threonine-protein kinase-like protein CCR1 [Glycine max]	molecular function: catalytic activity (GO:0003824);; molecular function: signal transducer activity (GO:0004871);; molecular function: molecular transducer activity (GO:0060089);; biological process: metabolic process (GO:0008152);; biological process: cellular process (GO:0009987);; biological process: signaling (GO:0023052);; biological process: single-organism process (GO:0044699);; biologica…
gene-LOC100794343	59.3475	58.7617	64.1059	7.2882	8.32569	8.15913	1.05e-09	-1.45161	down	[T]	Signal transduction mechanisms	Cellular Component: plasma membrane (GO:0005886);; Cellular Component: integral component of membrane (GO:0016021);; Molecular Function: oxidoreductase activity (GO:0016491);; Biological Process: oxidation-reduction process (GO:0055114);;	K00521|0.0e+00|gmx:100794343|K00521 ferric-chelate reductase [EC:1.16.1.7] | (RefSeq) ferric reduction oxidase 7, chloroplastic	--	[PQ]	Inorganic ion transport and metabolism;; Secondary metabolites biosynthesis, transport and catabolism	Ferric reductase NAD binding domain	Ferric reduction oxidase 7, chloroplastic OS=Arabidopsis thaliana OX=3702 GN=FRO7 PE=2 SV=1	--	--	ferric reduction oxidase 7, chloroplastic [Glycine max]	cellular component: cell (GO:0005623);; cellular component: membrane (GO:0016020);; cellular component: cell part (GO:0044464);; cellular component: membrane part (GO:0044425);; molecular function: catalytic activity (GO:0003824);; biological process: metabolic process (GO:0008152);; biological process: single-organism process (GO:0044699)
gene-LOC100797310	3.84368	8.90781	5.77644	9.86885	8.11762	9.53612	1.4e-07	1.97603	up	--	--	Molecular Function: zinc ion transmembrane transporter activity (GO:0005385);; Cellular Component: plasma membrane (GO:0005886);; Cellular Component: membrane (GO:0016020);; Cellular Component: integral component of membrane (GO:0016021);; Biological Process: zinc II ion transmembrane transport (GO:0071577);;	K14709|2.3e-171|gmx:100797310|K14709 solute carrier family 39 (zinc transporter), member 1/2/3 | (RefSeq) zinc transporter 6, chloroplastic	--	[P]	Inorganic ion transport and metabolism	ZIP Zinc transporter	Zinc transporter 6, chloroplastic OS=Arabidopsis thaliana OX=3702 GN=ZIP6 PE=3 SV=1	P	Inorganic ion transport and metabolism	zinc transporter 6, chloroplastic [Glycine max]	molecular function: transporter activity (GO:0005215);; biological process: localization (GO:0051179);; cellular component: cell (GO:0005623);; cellular component: membrane (GO:0016020);; cellular component: cell part (GO:0044464);; cellular component: membrane part (GO:0044425)
gene-LOC100786719	0.977963	0.631958	1.37221	0	0	0	1.19e-06	-6.23867	down	[DPM]	Cell cycle control, cell division, chromosome partitioning;; Inorganic ion transport and metabolism;; Cell wall/membrane/envelope biogenesis	Molecular Function: ferroxidase activity (GO:0004322);; Molecular Function: copper ion binding (GO:0005507);; Cellular Component: plasma membrane (GO:0005886);; Biological Process: iron ion transport (GO:0006826);; Biological Process: lignin catabolic process (GO:0046274);; Cellular Component: apoplast (GO:0048046);; Molecular Function: hydroquinone:oxygen oxidoreductase activity (GO:0052716);; B…	K05909|0.0e+00|gmx:100786719|K05909 laccase [EC:1.10.3.2] | (RefSeq) laccase-3	--	[Q]	Secondary metabolites biosynthesis, transport and catabolism	Multicopper oxidase	Laccase-3 OS=Arabidopsis thaliana OX=3702 GN=LAC3 PE=2 SV=2	Q	Secondary metabolites biosynthesis, transport and catabolism	laccase-3 [Glycine max]	molecular function: catalytic activity (GO:0003824);; biological process: metabolic process (GO:0008152);; biological process: single-organism process (GO:0044699);; molecular function: binding (GO:0005488);; cellular component: cell (GO:0005623);; cellular component: membrane (GO:0016020);; cellular component: cell part (GO:0044464);; biological process: localization (GO:0051179);; biological pr…
gene-LOC100815865	0.645254	0.720232	1.19782	1.00574	0.593706	0.566144	0.00267188	1.1868	up	--	--	Cellular Component: exocyst (GO:0000145);; Molecular Function: phosphatidylinositol-4,5-bisphosphate binding (GO:0005546);; Cellular Component: plasma membrane (GO:0005886);; Biological Process: exocytosis (GO:0006887);; Biological Process: Golgi to plasma membrane transport (GO:0006893);; Molecular Function: GTP-Rho binding (GO:0017049);; Biological Process: exocyst localization (GO:0051601);;	K19983|4.7e-205|gmx:100815865|K19983 exocyst complex component 1 | (RefSeq) exocyst complex component SEC3A isoform X2	--	[U]	Intracellular trafficking, secretion, and vesicular transport	Exocyst complex component Sec3	Exocyst complex component SEC3B OS=Arabidopsis thaliana OX=3702 GN=SEC3B PE=2 SV=1	U	Intracellular trafficking, secretion, and vesicular transport	exocyst complex component SEC3A isoform X2 [Glycine max]	cellular component: cell (GO:0005623);; cellular component: macromolecular complex (GO:0032991);; cellular component: cell part (GO:0044464);; molecular function: binding (GO:0005488);; cellular component: membrane (GO:0016020);; biological process: cellular process (GO:0009987);; biological process: single-organism process (GO:0044699);; biological process: localization (GO:0051179)
gene-LOC102659722	7.6944	4.64303	5.70636	0.723596	0.682392	1.51347	0.00102548	-1.32432	down	--	--	Cellular Component: plasma membrane (GO:0005886);; Cellular Component: integral component of membrane (GO:0016021);; Molecular Function: 4 iron, 4 sulfur cluster binding (GO:0051539);;	--	--	--	--	Domain of unknown function (DUF588)	CASP-like protein 1F2 OS=Ricinus communis OX=3988 GN=RCOM_1446020 PE=2 SV=1	S	Function unknown	CASP-like protein 1F2 isoform X1 [Glycine max]	cellular component: cell (GO:0005623);; cellular component: membrane (GO:0016020);; cellular component: cell part (GO:0044464);; cellular component: membrane part (GO:0044425);; molecular function: binding (GO:0005488)
gene-LOC100785759	2.23849	0.850051	2.59665	0	0	0	2.31e-08	-6.90798	down	[O]	Posttranslational modification, protein turnover, chaperones	Molecular Function: molecular_function (GO:0003674);; Molecular Function: binding (GO:0005488);; Molecular Function: protein binding (GO:0005515);; Cellular Component: cellular_component (GO:0005575);; Cellular Component: intracellular (GO:0005622);; Cellular Component: cell (GO:0005623);; Cellular Component: cytoplasm (GO:0005737);; Cellular Component: vacuole (GO:0005773);; Cellular Component: …	--	--	[C]	Energy production and conversion	SPFH domain / Band 7 family	Hypersensitive-induced response protein 2 OS=Arabidopsis thaliana OX=3702 GN=HIR2 PE=1 SV=1	C	Energy production and conversion	hypersensitive-induced response protein 1 isoform X1 [Glycine max]	molecular function: binding (GO:0005488);; cellular component: cell (GO:0005623);; cellular component: cell part (GO:0044464);; cellular component: organelle (GO:0043226);; cellular component: membrane (GO:0016020);; cellular component: organelle part (GO:0044422);; cellular component: cell junction (GO:0030054);; cellular component: symplast (GO:0055044)
gene-LOC100790221	1.1944	1.5818	1.33574	0	0	0	2.2e-07	-6.50634	down	--	--	Molecular Function: SNARE binding (GO:0000149);; Molecular Function: SNAP receptor activity (GO:0005484);; Cellular Component: plasma membrane (GO:0005886);; Biological Process: intracellular protein transport (GO:0006886);; Biological Process: exocytosis (GO:0006887);; Biological Process: vesicle fusion (GO:0006906);; Cellular Component: endomembrane system (GO:0012505);; Cellular Component: int…	K08486|1.9e-159|gmx:100790221|K08486 syntaxin 1B/2/3 | (RefSeq) syntaxin-121	SNARE interactions in vesicular transport (ko04130)	[U]	Intracellular trafficking, secretion, and vesicular transport	Syntaxin	Syntaxin-121 OS=Arabidopsis thaliana OX=3702 GN=SYP121 PE=1 SV=1	U	Intracellular trafficking, secretion, and vesicular transport	syntaxin-121 [Glycine max]	molecular function: binding (GO:0005488);; cellular component: cell (GO:0005623);; cellular component: membrane (GO:0016020);; cellular component: cell part (GO:0044464);; biological process: localization (GO:0051179);; biological process: cellular process (GO:0009987);; biological process: single-organism process (GO:0044699);; biological process: cellular component organization or biogenesis (G…
gene-LOC100806586	33.3923	43.9504	33.8411	5.95623	2.7343	8.84622	0.00128683	-1.25478	down	--	--	Cellular Component: Golgi membrane (GO:0000139);; Cellular Component: Golgi apparatus (GO:0005794);; Cellular Component: plasma membrane (GO:0005886);; Biological Process: protein transport (GO:0015031);; Cellular Component: integral component of membrane (GO:0016021);; Cellular Component: transport vesicle membrane (GO:0030658);; Cellular Component: trans-Golgi network membrane (GO:0032588);; Ce…	K19995|5.4e-150|gmx:100806586|K19995 secretory carrier-associated membrane protein | (RefSeq) uncharacterized protein LOC100806586	--	[U]	Intracellular trafficking, secretion, and vesicular transport	SCAMP family	Secretory carrier-associated membrane protein 4 OS=Arabidopsis thaliana OX=3702 GN=SCAMP4 PE=1 SV=1	U	Intracellular trafficking, secretion, and vesicular transport	uncharacterized protein LOC100806586 [Glycine max]	cellular component: cell (GO:0005623);; cellular component: membrane (GO:0016020);; cellular component: organelle (GO:0043226);; cellular component: organelle part (GO:0044422);; cellular component: cell part (GO:0044464);; biological process: localization (GO:0051179);; cellular component: membrane part (GO:0044425)
gene-LOC100806786	10.4683	10.3137	10.9029	1.29648	1.10752	0.436263	3.29e-06	-1.98667	down	[N]	Cell motility	Cellular Component: plasma membrane (GO:0005886);; Cellular Component: integral component of membrane (GO:0016021);; Molecular Function: cellulose synthase (UDP-forming) activity (GO:0016760);; Biological Process: cellulose biosynthetic process (GO:0030244);; Molecular Function: metal ion binding (GO:0046872);; Biological Process: cell wall organization (GO:0071555);;	K10999|0.0e+00|gmx:100806786|K10999 cellulose synthase A [EC:2.4.1.12] | (RefSeq) cellulose synthase A catalytic subunit 2 [UDP-forming] isoform X1	--	--	--	Cellulose synthase	Cellulose synthase A catalytic subunit 2 [UDP-forming] OS=Arabidopsis thaliana OX=3702 GN=CESA2 PE=1 SV=1	G	Carbohydrate transport and metabolism	cellulose synthase A catalytic subunit 2 [UDP-forming] isoform X1 [Glycine max]	cellular component: cell (GO:0005623);; cellular component: membrane (GO:0016020);; cellular component: cell part (GO:0044464);; cellular component: membrane part (GO:0044425);; molecular function: catalytic activity (GO:0003824);; biological process: metabolic process (GO:0008152);; biological process: cellular process (GO:0009987);; biological process: single-organism process (GO:0044699);; mol…
gene-LOC100777131	9.70602	6.69422	10.2868	0.373214	0.317986	0.463221	1.79e-25	-3.02508	down	[E]	Amino acid transport and metabolism	Molecular Function: peptidyltransferase activity (GO:0000048);; Cellular Component: plasma membrane (GO:0005886);; Biological Process: glutathione catabolic process (GO:0006751);; Cellular Component: integral component of membrane (GO:0016021);; Molecular Function: glutathione hydrolase activity (GO:0036374);;	K18592|3.2e-278|gmx:100777131|K18592 gamma-glutamyltranspeptidase / glutathione hydrolase / leukotriene-C4 hydrolase [EC:2.3.2.2 3.4.19.13 3.4.19.14] | (RefSeq) glutathione hydrolase 3 isoform X1	Taurine and hypotaurine metabolism (ko00430);; Cyanoamino acid metabolism (ko00460);; Glutathione metabolism (ko00480);; Arachidonic acid metabolism (ko00590)	[E]	Amino acid transport and metabolism	Gamma-glutamyltranspeptidase	Glutathione hydrolase 3 OS=Arabidopsis thaliana OX=3702 GN=GGT3 PE=2 SV=1	E	Amino acid transport and metabolism	Glutathione hydrolase 3 isoform B [Glycine soja]	molecular function: catalytic activity (GO:0003824);; cellular component: cell (GO:0005623);; cellular component: membrane (GO:0016020);; cellular component: cell part (GO:0044464);; biological process: metabolic process (GO:0008152);; biological process: cellular process (GO:0009987);; cellular component: membrane part (GO:0044425)
gene-LOC100814561	3.29856	3.24494	2.79606	3.2872	2.25183	6.75923	4.08e-06	1.77499	up	--	--	Molecular Function: calcium activated cation channel activity (GO:0005227);; Cellular Component: plasma membrane (GO:0005886);; Cellular Component: integral component of membrane (GO:0016021);;	K21989|0.0e+00|gmx:100814561|K21989 calcium permeable stress-gated cation channel | (RefSeq) CSC1-like protein RXW8 isoform X1	--	[R]	General function prediction only	Calcium-dependent channel, 7TM region, putative phosphate	CSC1-like protein RXW8 OS=Arabidopsis thaliana OX=3702 GN=RXW8 PE=2 SV=1	S	Function unknown	CSC1-like protein RXW8 isoform X1 [Glycine max]	molecular function: transporter activity (GO:0005215);; biological process: localization (GO:0051179);; cellular component: cell (GO:0005623);; cellular component: membrane (GO:0016020);; cellular component: cell part (GO:0044464);; cellular component: membrane part (GO:0044425)
gene-LOC100777985	2.06308	1.49816	2.38298	0.346515	0.255372	0.195287	4.82e-05	-1.41351	down	--	--	Cellular Component: 1,3-beta-D-glucan synthase complex (GO:0000148);; Molecular Function: 1,3-beta-D-glucan synthase activity (GO:0003843);; Cellular Component: plasma membrane (GO:0005886);; Biological Process: (1->3)-beta-D-glucan biosynthetic process (GO:0006075);; Cellular Component: integral component of membrane (GO:0016021);; Molecular Function: glucosyltransferase activity (GO:0046527);;	K11000|0.0e+00|gmx:100777985|K11000 callose synthase [EC:2.4.1.-] | (RefSeq) callose synthase 5-like	--	[M]	Cell wall/membrane/envelope biogenesis	1,3-beta-glucan synthase component	Callose synthase 5 OS=Arabidopsis thaliana OX=3702 GN=CALS5 PE=1 SV=1	M	Cell wall/membrane/envelope biogenesis	callose synthase 5-like [Glycine max]	cellular component: cell (GO:0005623);; cellular component: membrane (GO:0016020);; cellular component: macromolecular complex (GO:0032991);; cellular component: membrane part (GO:0044425);; cellular component: cell part (GO:0044464);; molecular function: catalytic activity (GO:0003824);; biological process: metabolic process (GO:0008152);; biological process: cellular process (GO:0009987);; biol…
gene-LOC100813207	1.0304	0.914024	1.1687	1.47158	1.5655	0.749112	6.91e-05	1.74595	up	--	--	Molecular Function: protein kinase activity (GO:0004672);; Molecular Function: ATP binding (GO:0005524);; Cellular Component: plasma membrane (GO:0005886);; Biological Process: hormone-mediated signaling pathway (GO:0009755);; Cellular Component: integral component of membrane (GO:0016021);;	K13435|2.0e-25|spen:107018783|K13435 serine/threonine-protein kinase Pto | (RefSeq) receptor-like protein kinase HERK 1 isoform X2	Plant-pathogen interaction (ko04626)	--	--	Protein tyrosine and serine/threonine kinase	Probable inactive leucine-rich repeat receptor-like protein kinase At3g03770 OS=Arabidopsis thaliana OX=3702 GN=At3g03770 PE=1 SV=1	T	Signal transduction mechanisms	probable inactive leucine-rich repeat receptor-like protein kinase At3g03770 [Glycine max]	molecular function: catalytic activity (GO:0003824);; biological process: metabolic process (GO:0008152);; biological process: cellular process (GO:0009987);; molecular function: binding (GO:0005488);; cellular component: cell (GO:0005623);; cellular component: membrane (GO:0016020);; cellular component: cell part (GO:0044464);; biological process: signaling (GO:0023052);; biological process: sin…
gene-GMIQD30	7.48717	7.33117	7.62913	7.38849	4.99798	5.04684	7.15e-06	1.06064	up	--	--	Molecular Function: protein binding (GO:0005515);; Cellular Component: cellular_component (GO:0005575);; Cellular Component: intracellular (GO:0005622);; Cellular Component: cell (GO:0005623);; Cellular Component: cytoplasm (GO:0005737);; Cellular Component: cytosol (GO:0005829);; Cellular Component: cytoskeleton (GO:0005856);; Cellular Component: microtubule associated complex (GO:0005875);; Cel…	--	--	--	--	IQ calmodulin-binding motif	Protein IQ-DOMAIN 31 OS=Arabidopsis thaliana OX=3702 GN=IQD31 PE=1 SV=1	S	Function unknown	protein IQ-DOMAIN 31 [Glycine max]	molecular function: binding (GO:0005488);; cellular component: cell (GO:0005623);; cellular component: cell part (GO:0044464);; cellular component: organelle (GO:0043226);; cellular component: macromolecular complex (GO:0032991);; cellular component: organelle part (GO:0044422);; cellular component: membrane (GO:0016020)
gene-LOC100796956	6.04212	17.4244	5.0053	0.042321	0	0	4.15e-18	-7.22716	down	[DPM]	Cell cycle control, cell division, chromosome partitioning;; Inorganic ion transport and metabolism;; Cell wall/membrane/envelope biogenesis	Molecular Function: ferroxidase activity (GO:0004322);; Molecular Function: copper ion binding (GO:0005507);; Cellular Component: plasma membrane (GO:0005886);; Biological Process: iron ion transport (GO:0006826);; Biological Process: lignin catabolic process (GO:0046274);; Cellular Component: apoplast (GO:0048046);; Molecular Function: hydroquinone:oxygen oxidoreductase activity (GO:0052716);; B…	K05909|0.0e+00|gmx:100796956|K05909 laccase [EC:1.10.3.2] | (RefSeq) laccase-5	--	[Q]	Secondary metabolites biosynthesis, transport and catabolism	Multicopper oxidase	Laccase-5 OS=Arabidopsis thaliana OX=3702 GN=LAC5 PE=2 SV=1	Q	Secondary metabolites biosynthesis, transport and catabolism	laccase-5 [Glycine max]	molecular function: catalytic activity (GO:0003824);; biological process: metabolic process (GO:0008152);; biological process: single-organism process (GO:0044699);; molecular function: binding (GO:0005488);; cellular component: cell (GO:0005623);; cellular component: membrane (GO:0016020);; cellular component: cell part (GO:0044464);; biological process: localization (GO:0051179);; biological pr…
gene-LOC100805115	9.32754	5.63426	11.063	0.973605	1.07401	1.10819	8.33e-06	-1.53667	down	--	--	Cellular Component: plasma membrane (GO:0005886);; Molecular Function: peptide:proton symporter activity (GO:0015333);; Cellular Component: integral component of membrane (GO:0016021);; Molecular Function: oligopeptide transmembrane transporter activity (GO:0035673);; Molecular Function: peptide transmembrane transporter activity (GO:1904680);;	K14638|0.0e+00|gmx:100805115|K14638 solute carrier family 15 (peptide/histidine transporter), member 3/4 | (RefSeq) protein NRT1/ PTR FAMILY 1.2	--	[E]	Amino acid transport and metabolism	POT family	Protein NRT1/ PTR FAMILY 1.2 OS=Arabidopsis thaliana OX=3702 GN=NPF1.2 PE=1 SV=1	E	Amino acid transport and metabolism	protein NRT1/ PTR FAMILY 1.2 [Glycine max]	cellular component: cell (GO:0005623);; cellular component: membrane (GO:0016020);; cellular component: cell part (GO:0044464);; molecular function: transporter activity (GO:0005215);; biological process: single-organism process (GO:0044699);; biological process: localization (GO:0051179);; cellular component: membrane part (GO:0044425)
gene-LOC100306063	47.2348	106.919	47.1082	1.38956	0.673571	4.02708	1.07e-09	-3.54556	down	--	--	Cellular Component: cellular_component (GO:0005575);; Cellular Component: cell (GO:0005623);; Cellular Component: plasma membrane (GO:0005886);; Cellular Component: membrane (GO:0016020);; Cellular Component: intrinsic component of membrane (GO:0031224);; Cellular Component: anchored component of membrane (GO:0031225);; Cellular Component: intrinsic component of plasma membrane (GO:0031226);; Cel…	--	--	--	--	--	Uncharacterized GPI-anchored protein At5g19250 OS=Arabidopsis thaliana OX=3702 GN=At5g19250 PE=2 SV=1	S	Function unknown	uncharacterized protein LOC100306063 precursor [Glycine max]	cellular component: cell (GO:0005623);; cellular component: membrane (GO:0016020);; cellular component: cell part (GO:0044464);; cellular component: membrane part (GO:0044425)
gene-LOC100785359	4.48531	1.95915	3.43064	0.095786	0	0	4.2e-09	-4.83385	down	[G]	Carbohydrate transport and metabolism	Cellular Component: vacuole (GO:0005773);; Cellular Component: plasma membrane (GO:0005886);; Cellular Component: integral component of plasma membrane (GO:0005887);; Molecular Function: sucrose:proton symporter activity (GO:0008506);; Cellular Component: membrane (GO:0016020);;	K15378|4.1e-292|gmx:100785359|K15378 solute carrier family 45, member 1/2/4 | (RefSeq) sucrose transport protein SUC8 isoform X1	--	[G]	Carbohydrate transport and metabolism	MFS/sugar transport protein	Sucrose transport protein SUC8 OS=Arabidopsis thaliana OX=3702 GN=SUC8 PE=1 SV=1	G	Carbohydrate transport and metabolism	sucrose transport protein SUC8 isoform X1 [Glycine max]	cellular component: cell (GO:0005623);; cellular component: organelle (GO:0043226);; cellular component: cell part (GO:0044464);; cellular component: membrane (GO:0016020);; cellular component: membrane part (GO:0044425);; molecular function: transporter activity (GO:0005215);; biological process: single-organism process (GO:0044699);; biological process: localization (GO:0051179)
gene-LOC100819559	10.5004	7.33815	9.68127	16.1833	18.81	12.1237	1.9e-12	2.25407	up	[P]	Inorganic ion transport and metabolism	Molecular Function: magnesium ion binding (GO:0000287);; Molecular Function: ATP binding (GO:0005524);; Cellular Component: plasma membrane (GO:0005886);; Cellular Component: integral component of membrane (GO:0016021);; Biological Process: phospholipid translocation (GO:0045332);;	K01530|0.0e+00|gmx:100819559|K01530 phospholipid-translocating ATPase [EC:7.6.2.1] | (RefSeq) probable phospholipid-transporting ATPase 4 isoform X2	--	[R]	General function prediction only	Phospholipid-translocating P-type ATPase C-terminal	Probable phospholipid-transporting ATPase 4 OS=Arabidopsis thaliana OX=3702 GN=ALA4 PE=3 SV=2	P	Inorganic ion transport and metabolism	probable phospholipid-transporting ATPase 4 isoform X1 [Glycine max]	molecular function: binding (GO:0005488);; cellular component: cell (GO:0005623);; cellular component: membrane (GO:0016020);; cellular component: cell part (GO:0044464);; cellular component: membrane part (GO:0044425);; biological process: cellular process (GO:0009987);; biological process: single-organism process (GO:0044699);; biological process: localization (GO:0051179);; biological process:…
gene-LOC100801735	4.86075	4.16492	4.26757	0.457883	0.349592	0.944178	0.0003635	-1.44706	down	--		Molecular Function: protein serine/threonine kinase activity (GO:0004674);; Molecular Function: ATP binding (GO:0005524);; Cellular Component: plasma membrane (GO:0005886);; Cellular Component: integral component of membrane (GO:0016021);; Biological Process: protein autophosphorylation (GO:0046777);;	K13416|4.0e-65|oeu:111411740|K13416 brassinosteroid insensitive 1-associated receptor kinase 1 [EC:2.7.10.1 2.7.11.1] | (RefSeq) BRASSINOSTEROID INSENSITIVE 1-associated receptor kinase 1-like	MAPK signaling pathway - plant (ko04016);; Plant hormone signal transduction (ko04075);; Plant-pathogen interaction (ko04626)	[T]	Signal transduction mechanisms	Protein kinase domain	Cold-responsive protein kinase 1 OS=Arabidopsis thaliana OX=3702 GN=CRPK1 PE=1 SV=1	T	Signal transduction mechanisms	cold-responsive protein kinase 1 isoform X1 [Glycine max]	molecular function: catalytic activity (GO:0003824);; biological process: metabolic process (GO:0008152);; biological process: cellular process (GO:0009987);; molecular function: binding (GO:0005488);; cellular component: cell (GO:0005623);; cellular component: membrane (GO:0016020);; cellular component: cell part (GO:0044464);; cellular component: membrane part (GO:0044425)
gene-LOC100775428	2.76545	0.751746	2.42778	0	0.029648	0.011434	4.29e-09	-4.82961	down	[T]	Signal transduction mechanisms	Molecular Function: protein serine/threonine kinase activity (GO:0004674);; Molecular Function: ATP binding (GO:0005524);; Cellular Component: plasma membrane (GO:0005886);; Biological Process: protein phosphorylation (GO:0006468);; Cellular Component: integral component of membrane (GO:0016021);;	K24104|2.2e-83|thj:104799061|K24104 GPN-loop GTPase | (RefSeq) LOW QUALITY PROTEIN: uncharacterized protein LOC104799061	--	--	--	Protein tyrosine and serine/threonine kinase	Cysteine-rich receptor-like protein kinase 8 OS=Arabidopsis thaliana OX=3702 GN=CRK8 PE=3 SV=2	T	Signal transduction mechanisms	putative receptor-like protein kinase At4g00960 [Glycine max]	molecular function: catalytic activity (GO:0003824);; biological process: metabolic process (GO:0008152);; biological process: cellular process (GO:0009987);; molecular function: binding (GO:0005488);; cellular component: cell (GO:0005623);; cellular component: membrane (GO:0016020);; cellular component: cell part (GO:0044464);; cellular component: membrane part (GO:0044425)
gene-LOC100500293	10.4832	20.3941	11.3842	0.310107	0.465876	0.218394	4.3e-14	-3.79325	down	--	--	Cellular Component: plasma membrane (GO:0005886);; Biological Process: plant-type secondary cell wall biogenesis (GO:0009834);;	--	--	--	--	Fasciclin domain	Fasciclin-like arabinogalactan protein 9 OS=Arabidopsis thaliana OX=3702 GN=FLA9 PE=2 SV=1	S	Function unknown	fasciclin-like arabinogalactan protein 13 [Glycine max]	cellular component: cell (GO:0005623);; cellular component: membrane (GO:0016020);; cellular component: cell part (GO:0044464);; biological process: cellular process (GO:0009987);; biological process: cellular component organization or biogenesis (GO:0071840)
--	1.49649	1.6153	1.22656	0.286358	0.051264	0.126972	0.00159968	-1.7512	down	[M]	Cell wall/membrane/envelope biogenesis	Molecular Function: protein kinase activity (GO:0004672);; Molecular Function: ATP binding (GO:0005524);; Cellular Component: plasma membrane (GO:0005886);; Cellular Component: plasmodesma (GO:0009506);; Cellular Component: integral component of membrane (GO:0016021);; Biological Process: protein autophosphorylation (GO:0046777);;	K13435|2.1e-97|sly:101268866|K13435 serine/threonine-protein kinase Pto | (RefSeq) Pto; serine/threonine protein kinase Pto	Plant-pathogen interaction (ko04626)	[T]	Signal transduction mechanisms	Protein tyrosine and serine/threonine kinase	Probable receptor-like protein kinase At5g24010 OS=Arabidopsis thaliana OX=3702 GN=At5g24010 PE=1 SV=1	T	Signal transduction mechanisms	hypothetical protein GLYMA_16G179600 [Glycine max]	molecular function: catalytic activity (GO:0003824);; biological process: metabolic process (GO:0008152);; biological process: cellular process (GO:0009987);; molecular function: binding (GO:0005488);; cellular component: cell (GO:0005623);; cellular component: membrane (GO:0016020);; cellular component: cell part (GO:0044464);; cellular component: cell junction (GO:0030054);; cellular component:…
gene-LOC100791755	1.25634	0.848402	1.47397	0.031996	0	0	3.38e-06	-4.68309	down	--	--	Cellular Component: plasma membrane (GO:0005886);; Cellular Component: plasmodesma (GO:0009506);; Cellular Component: integral component of membrane (GO:0016021);;	K01184|9.3e-09|hbr:110656842|K01184 polygalacturonase [EC:3.2.1.15] | (RefSeq) polygalacturonase QRT2-like	Pentose and glucuronate interconversions (ko00040)	--	--	Tetraspanin family	Protein TORNADO 2 OS=Arabidopsis thaliana OX=3702 GN=TRN2 PE=1 SV=1	S	Function unknown	protein TORNADO 2 [Glycine max]	cellular component: cell (GO:0005623);; cellular component: membrane (GO:0016020);; cellular component: cell part (GO:0044464);; cellular component: cell junction (GO:0030054);; cellular component: membrane part (GO:0044425)
gene-LOC100784185	0	0.156536	0	3.83082	5.79385	2.46299	0.00672364	4.3097	up	[M]	Cell wall/membrane/envelope biogenesis	Molecular Function: protein kinase activity (GO:0004672);; Molecular Function: ATP binding (GO:0005524);; Cellular Component: plasma membrane (GO:0005886);; Biological Process: hormone-mediated signaling pathway (GO:0009755);; Cellular Component: integral component of membrane (GO:0016021);;	K13415|7.9e-79|han:110929858|K13415 protein brassinosteroid insensitive 1 [EC:2.7.10.1 2.7.11.1] | (RefSeq) systemin receptor SR160-like	Plant hormone signal transduction (ko04075)	--	--	Protein kinase domain	MDIS1-interacting receptor like kinase 2 OS=Arabidopsis thaliana OX=3702 GN=MIK2 PE=1 SV=3	T	Signal transduction mechanisms	MDIS1-interacting receptor like kinase 2 [Glycine max]	molecular function: catalytic activity (GO:0003824);; biological process: metabolic process (GO:0008152);; biological process: cellular process (GO:0009987);; molecular function: binding (GO:0005488);; cellular component: cell (GO:0005623);; cellular component: membrane (GO:0016020);; cellular component: cell part (GO:0044464);; biological process: signaling (GO:0023052);; biological process: sin…
gene-LOC100789054	3.96148	6.26177	4.5655	6.06639	6.02537	3.40923	0.00017548	1.51995	up	[E]	Amino acid transport and metabolism	Cellular Component: plasma membrane (GO:0005886);; Molecular Function: peptide:proton symporter activity (GO:0015333);; Cellular Component: integral component of membrane (GO:0016021);; Molecular Function: oligopeptide transmembrane transporter activity (GO:0035673);; Molecular Function: peptide transmembrane transporter activity (GO:1904680);;	K14638|0.0e+00|gmx:100789054|K14638 solute carrier family 15 (peptide/histidine transporter), member 3/4 | (RefSeq) protein NRT1/ PTR FAMILY 1.2	--	[E]	Amino acid transport and metabolism	POT family	Protein NRT1/ PTR FAMILY 1.2 OS=Arabidopsis thaliana OX=3702 GN=NPF1.2 PE=1 SV=1	E	Amino acid transport and metabolism	protein NRT1/ PTR FAMILY 1.2 [Glycine max]	cellular component: cell (GO:0005623);; cellular component: membrane (GO:0016020);; cellular component: cell part (GO:0044464);; molecular function: transporter activity (GO:0005215);; biological process: single-organism process (GO:0044699);; biological process: localization (GO:0051179);; cellular component: membrane part (GO:0044425)
gene-LOC100781258	0.941951	0.572577	1.02108	0.762565	0.82445	0.922403	0.00019627	1.44152	up	--		Biological Process: defense response to oomycetes (GO:0002229);; Molecular Function: transmembrane receptor protein serine/threonine kinase activity (GO:0004675);; Molecular Function: ATP binding (GO:0005524);; Cellular Component: plasma membrane (GO:0005886);; Biological Process: defense response (GO:0006952);; Cellular Component: integral component of membrane (GO:0016021);; Molecular Function:…	K22133|2.8e-89|egr:104443802|K22133 oxalate---CoA ligase [EC:6.2.1.8] | (RefSeq) oxalate--CoA ligase	Glyoxylate and dicarboxylate metabolism (ko00630)	--	--	Legume lectin domain	L-type lectin-domain containing receptor kinase IX.1 OS=Arabidopsis thaliana OX=3702 GN=LECRK91 PE=1 SV=1	T	Signal transduction mechanisms	L-type lectin-domain containing receptor kinase IX.1 [Glycine max]	biological process: response to stimulus (GO:0050896);; biological process: multi-organism process (GO:0051704);; molecular function: catalytic activity (GO:0003824);; molecular function: signal transducer activity (GO:0004871);; molecular function: molecular transducer activity (GO:0060089);; biological process: metabolic process (GO:0008152);; biological process: cellular process (GO:0009987);;…
gene-LOC100789469	1.40687	0.491128	1.04587	1.43867	1.44234	0.870635	0.000384172	1.78667	up	--	--	Molecular Function: protein binding (GO:0005515);; Cellular Component: cellular_component (GO:0005575);; Cellular Component: intracellular (GO:0005622);; Cellular Component: cell (GO:0005623);; Cellular Component: cytoplasm (GO:0005737);; Cellular Component: cytosol (GO:0005829);; Cellular Component: plasma membrane (GO:0005886);; Biological Process: lipid metabolic process (GO:0006629);; Biologi…	K21843|0.0e+00|gmx:100789469|K21843 tetratricopeptide repeat protein 7 | (RefSeq) protein NPGR2 isoform X1	--	[T]	Signal transduction mechanisms	Tetratricopeptide repeat	Protein NPGR2 OS=Arabidopsis thaliana OX=3702 GN=NPGR2 PE=1 SV=1	T	Signal transduction mechanisms	protein NPGR2 isoform X1 [Glycine max]	molecular function: binding (GO:0005488);; cellular component: cell (GO:0005623);; cellular component: cell part (GO:0044464);; cellular component: membrane (GO:0016020);; biological process: metabolic process (GO:0008152);; biological process: single-organism process (GO:0044699);; biological process: cellular process (GO:0009987);; biological process: localization (GO:0051179);; biological proc…
gene-LOC100784393	14.718	11.2088	14.2159	11.0714	12.0706	8.8011	9.17e-05	1.15486	up	--	--	Biological Process: immune system process (GO:0002376);; Molecular Function: molecular_function (GO:0003674);; Molecular Function: binding (GO:0005488);; Molecular Function: protein binding (GO:0005515);; Cellular Component: cellular_component (GO:0005575);; Cellular Component: intracellular (GO:0005622);; Cellular Component: cell (GO:0005623);; Cellular Component: cytoplasm (GO:0005737);; Cellul…	K11838|3.5e-20|cic:CICLE_v10027709mg|K11838 ubiquitin carboxyl-terminal hydrolase 7 [EC:3.4.19.12] | (RefSeq) hypothetical protein	--	--	--	MATH domain	TNF receptor-associated factor homolog 1a OS=Arabidopsis thaliana OX=3702 GN=TRAF1A PE=1 SV=1	S	Function unknown	TNF receptor-associated factor homolog 1b isoform X1 [Glycine max]	biological process: immune system process (GO:0002376);; molecular function: binding (GO:0005488);; cellular component: cell (GO:0005623);; cellular component: cell part (GO:0044464);; cellular component: membrane (GO:0016020);; biological process: metabolic process (GO:0008152);; biological process: cellular process (GO:0009987);; biological process: response to stimulus (GO:0050896);; biologica…
gene-LOC100800782	7.35252	6.93618	7.45477	8.27831	12.1377	8.39827	2.1e-08	1.89159	up	--	--	Cellular Component: plasma membrane (GO:0005886);; Molecular Function: kinase activity (GO:0016301);; Molecular Function: kinase inhibitor activity (GO:0019210);;	K14499|7.5e-09|egr:104447903|K14499 BRI1 kinase inhibitor 1 | (RefSeq) BRI1 kinase inhibitor 1	Plant hormone signal transduction (ko04075)	--	--	--	Probable membrane-associated kinase regulator 1 OS=Arabidopsis thaliana OX=3702 GN=MAKR1 PE=1 SV=1	S	Function unknown	probable membrane-associated kinase regulator 1 [Glycine max]	cellular component: cell (GO:0005623);; cellular component: membrane (GO:0016020);; cellular component: cell part (GO:0044464);; molecular function: catalytic activity (GO:0003824);; molecular function: molecular function regulator (GO:0098772);; biological process: biological regulation (GO:0065007)
gene-LOC100819452	1.10738	0.745326	1.30252	0.064509	0	0.078357	0.00019868	-2.7979	down	--	--	Biological Process: amino acid transmembrane transport (GO:0003333);; Cellular Component: plasma membrane (GO:0005886);; Molecular Function: amino acid transmembrane transporter activity (GO:0015171);; Cellular Component: integral component of membrane (GO:0016021);;	K19476|5.4e-88|cic:CICLE_v10026997mg|K19476 vacuolar protein sorting-associated protein IST1 | (RefSeq) hypothetical protein	Endocytosis (ko04144)	[E]	Amino acid transport and metabolism	Transmembrane amino acid transporter protein	Lysine histidine transporter-like 8 OS=Arabidopsis thaliana OX=3702 GN=AATL1 PE=1 SV=1	E	Amino acid transport and metabolism	amino acid transporter protein [Glycine max]	biological process: single-organism process (GO:0044699);; biological process: localization (GO:0051179);; cellular component: cell (GO:0005623);; cellular component: membrane (GO:0016020);; cellular component: cell part (GO:0044464);; molecular function: transporter activity (GO:0005215);; cellular component: membrane part (GO:0044425)
gene-LOC100802385	5.27314	2.60592	5.02299	16.8851	16.1424	11.3092	1.2e-19	3.23086	up	--	--	Cellular Component: plasma membrane (GO:0005886);;	K19366|3.2e-237|gmx:100802385|K19366 spartin | (RefSeq) protein EARLY-RESPONSIVE TO DEHYDRATION 7, chloroplastic	Endocytosis (ko04144)	--	--	Senescence-associated protein	Protein EARLY-RESPONSIVE TO DEHYDRATION 7, chloroplastic OS=Arabidopsis thaliana OX=3702 GN=ERD7 PE=1 SV=1	S	Function unknown	protein EARLY-RESPONSIVE TO DEHYDRATION 7, chloroplastic [Glycine max]	cellular component: cell (GO:0005623);; cellular component: membrane (GO:0016020);; cellular component: cell part (GO:0044464)
gene-LOC100796335	6.17474	11.8637	6.82048	0.188407	0.129227	0.155898	1.11e-24	-4.16477	down	[F]	Nucleotide transport and metabolism	Cellular Component: plasma membrane (GO:0005886);; Cellular Component: integral component of membrane (GO:0016021);; Molecular Function: transmembrane transporter activity (GO:0022857);;	K14611|8.8e-312|lja:Lj2g3v1455090.1|K14611 solute carrier family 23 (nucleobase transporter), member 1 | (RefSeq) Lj2g3v1455090.1; -	--	[F]	Nucleotide transport and metabolism	Permease family	Nucleobase-ascorbate transporter 11 OS=Arabidopsis thaliana OX=3702 GN=NAT11 PE=2 SV=1	F	Nucleotide transport and metabolism	nucleobase-ascorbate transporter 11 [Glycine max]	cellular component: cell (GO:0005623);; cellular component: membrane (GO:0016020);; cellular component: cell part (GO:0044464);; cellular component: membrane part (GO:0044425);; molecular function: transporter activity (GO:0005215);; biological process: localization (GO:0051179)
gene-LOC100807432	3.20439	4.88444	3.01524	0.60476	0.583227	0.496196	0.00140598	-1.24084	down	[T]	Signal transduction mechanisms	Molecular Function: transmembrane receptor protein serine/threonine kinase activity (GO:0004675);; Molecular Function: ATP binding (GO:0005524);; Cellular Component: plasma membrane (GO:0005886);; Biological Process: protein phosphorylation (GO:0006468);; Cellular Component: integral component of membrane (GO:0016021);;	K16224|9.0e-35|boe:106304564|K16224 senescence-induced receptor-like serine/threonine-protein kinase | (RefSeq) senescence-induced receptor-like serine/threonine-protein kinase	MAPK signaling pathway - plant (ko04016);; Plant-pathogen interaction (ko04626)	[T]	Signal transduction mechanisms	Protein kinase domain	Putative receptor-like protein kinase At1g80870 OS=Arabidopsis thaliana OX=3702 GN=At1g80870 PE=3 SV=1	T	Signal transduction mechanisms	putative receptor-like protein kinase At1g80870 [Glycine max]	molecular function: catalytic activity (GO:0003824);; molecular function: signal transducer activity (GO:0004871);; molecular function: molecular transducer activity (GO:0060089);; biological process: metabolic process (GO:0008152);; biological process: cellular process (GO:0009987);; biological process: signaling (GO:0023052);; biological process: single-organism process (GO:0044699);; biologica…
gene-LOC100820483	6.60892	6.57343	7.06841	8.03149	6.79664	7.91245	4.96e-19	1.61569	up	[G]	Carbohydrate transport and metabolism	Cellular Component: vacuole (GO:0005773);; Cellular Component: plasma membrane (GO:0005886);; Cellular Component: integral component of plasma membrane (GO:0005887);; Molecular Function: sucrose:proton symporter activity (GO:0008506);; Cellular Component: membrane (GO:0016020);;	K15378|1.1e-284|gmx:100820483|K15378 solute carrier family 45, member 1/2/4 | (RefSeq) sucrose transport protein SUC4	--	[G]	Carbohydrate transport and metabolism	MFS/sugar transport protein	Sucrose transport protein SUC4 OS=Arabidopsis thaliana OX=3702 GN=SUC4 PE=1 SV=2	G	Carbohydrate transport and metabolism	sucrose transport protein SUC4 [Glycine max]	cellular component: cell (GO:0005623);; cellular component: organelle (GO:0043226);; cellular component: cell part (GO:0044464);; cellular component: membrane (GO:0016020);; cellular component: membrane part (GO:0044425);; molecular function: transporter activity (GO:0005215);; biological process: single-organism process (GO:0044699);; biological process: localization (GO:0051179)
gene-LOC102667134	0.673053	0.671277	0.835833	0	0	0	6.35e-07	-6.32456	down	--		Molecular Function: protein serine/threonine kinase activity (GO:0004674);; Molecular Function: ATP binding (GO:0005524);; Cellular Component: plasma membrane (GO:0005886);; Biological Process: protein phosphorylation (GO:0006468);; Cellular Component: integral component of membrane (GO:0016021);; Molecular Function: ubiquitin protein ligase binding (GO:0031625);; Biological Process: recognition …	K24104|2.3e-74|thj:104799061|K24104 GPN-loop GTPase | (RefSeq) LOW QUALITY PROTEIN: uncharacterized protein LOC104799061	--	--	--	Protein tyrosine and serine/threonine kinase	G-type lectin S-receptor-like serine/threonine-protein kinase At4g27290 OS=Arabidopsis thaliana OX=3702 GN=At4g27290 PE=3 SV=4	G	Carbohydrate transport and metabolism	G-type lectin S-receptor-like serine/threonine-protein kinase At4g27290 [Glycine max]	molecular function: catalytic activity (GO:0003824);; biological process: metabolic process (GO:0008152);; biological process: cellular process (GO:0009987);; molecular function: binding (GO:0005488);; cellular component: cell (GO:0005623);; cellular component: membrane (GO:0016020);; cellular component: cell part (GO:0044464);; cellular component: membrane part (GO:0044425);; biological process:…
gene-LOC100801077	4.95178	4.69149	4.39223	3.27271	3.25692	3.7284	8.53e-06	1.0047	up	[T]	Signal transduction mechanisms	Molecular Function: peroxidase activity (GO:0004601);; Molecular Function: calcium ion binding (GO:0005509);; Cellular Component: plasma membrane (GO:0005886);; Cellular Component: integral component of membrane (GO:0016021);; Molecular Function: NAD(P)H oxidase activity (GO:0016174);; Biological Process: oxidation-reduction process (GO:0055114);;	K13447|0.0e+00|gmx:100801077|K13447 respiratory burst oxidase [EC:1.6.3.- 1.11.1.-] | (RefSeq) respiratory burst oxidase homolog protein A	MAPK signaling pathway - plant (ko04016);; Plant-pathogen interaction (ko04626)	[PQ]	Inorganic ion transport and metabolism;; Secondary metabolites biosynthesis, transport and catabolism	Ferric reductase NAD binding domain	Respiratory burst oxidase homolog protein A OS=Solanum tuberosum OX=4113 GN=RBOHA PE=1 SV=1	--	--	respiratory burst oxidase homolog protein A [Glycine max]	molecular function: catalytic activity (GO:0003824);; molecular function: antioxidant activity (GO:0016209);; biological process: metabolic process (GO:0008152);; biological process: cellular process (GO:0009987);; biological process: single-organism process (GO:0044699);; biological process: response to stimulus (GO:0050896);; biological process: detoxification (GO:0098754);; molecular function:…
gene-LOC100811613	57.4532	28.5806	55.8458	57.5968	29.9684	37.9558	0.00018974	1.24757	up	[GER]	Carbohydrate transport and metabolism;; Amino acid transport and metabolism;; General function prediction only	Cellular Component: plasma membrane (GO:0005886);; Cellular Component: integral component of membrane (GO:0016021);; Molecular Function: transmembrane transporter activity (GO:0022857);;	--	--	--	--	EamA-like transporter family	WAT1-related protein At1g09380 OS=Arabidopsis thaliana OX=3702 GN=At1g09380 PE=2 SV=1	S	Function unknown	WAT1-related protein At1g09380 isoform X1 [Glycine max]	cellular component: cell (GO:0005623);; cellular component: membrane (GO:0016020);; cellular component: cell part (GO:0044464);; cellular component: membrane part (GO:0044425);; molecular function: transporter activity (GO:0005215);; biological process: localization (GO:0051179)
gene-LOC100797749	9.23322	31.2312	8.43951	0	0	0	9.59e-19	-9.66227	down	[DPM]	Cell cycle control, cell division, chromosome partitioning;; Inorganic ion transport and metabolism;; Cell wall/membrane/envelope biogenesis	Molecular Function: ferroxidase activity (GO:0004322);; Molecular Function: copper ion binding (GO:0005507);; Cellular Component: plasma membrane (GO:0005886);; Biological Process: iron ion transport (GO:0006826);; Biological Process: lignin catabolic process (GO:0046274);; Cellular Component: apoplast (GO:0048046);; Molecular Function: hydroquinone:oxygen oxidoreductase activity (GO:0052716);; B…	K05909|0.0e+00|gmx:100797749|K05909 laccase [EC:1.10.3.2] | (RefSeq) laccase-5	--	[Q]	Secondary metabolites biosynthesis, transport and catabolism	Multicopper oxidase	Laccase-5 OS=Arabidopsis thaliana OX=3702 GN=LAC5 PE=2 SV=1	Q	Secondary metabolites biosynthesis, transport and catabolism	laccase-5 [Glycine max]	molecular function: catalytic activity (GO:0003824);; biological process: metabolic process (GO:0008152);; biological process: single-organism process (GO:0044699);; molecular function: binding (GO:0005488);; cellular component: cell (GO:0005623);; cellular component: membrane (GO:0016020);; cellular component: cell part (GO:0044464);; biological process: localization (GO:0051179);; biological pr…
gene-LOC100779230	2.81867	2.80656	2.28646	0	0.022591	0.103734	1.6e-09	-4.12182	down	--	--	Cellular Component: plasma membrane (GO:0005886);; Molecular Function: protein phosphatase 1 binding (GO:0008157);; Cellular Component: integral component of membrane (GO:0016021);; Molecular Function: protein phosphatase regulator activity (GO:0019888);; Biological Process: regulation of protein dephosphorylation (GO:0035304);;	K01184|2.9e-17|bna:106400152|K01184 polygalacturonase [EC:3.2.1.15] | (RefSeq) polygalacturonase	Pentose and glucuronate interconversions (ko00040)	[R]	General function prediction only	Ankyrin repeats (3 copies)	Ankyrin repeat-containing protein At5g02620 OS=Arabidopsis thaliana OX=3702 GN=At5g02620 PE=1 SV=1	S	Function unknown	ankyrin repeat-containing protein At5g02620 [Glycine max]	cellular component: cell (GO:0005623);; cellular component: membrane (GO:0016020);; cellular component: cell part (GO:0044464);; molecular function: binding (GO:0005488);; cellular component: membrane part (GO:0044425);; molecular function: molecular function regulator (GO:0098772);; biological process: biological regulation (GO:0065007)
gene-LOC100777461	2.89893	3.83252	2.94665	14.7378	5.52747	11.7131	3.6e-21	3.0934	up	[T]	Signal transduction mechanisms	Molecular Function: peroxidase activity (GO:0004601);; Cellular Component: plasma membrane (GO:0005886);; Cellular Component: integral component of membrane (GO:0016021);; Molecular Function: NAD(P)H oxidase activity (GO:0016174);; Biological Process: oxidation-reduction process (GO:0055114);;	K13447|0.0e+00|gmx:100777461|K13447 respiratory burst oxidase [EC:1.6.3.- 1.11.1.-] | (RefSeq) respiratory burst oxidase homolog protein A isoform X1	MAPK signaling pathway - plant (ko04016);; Plant-pathogen interaction (ko04626)	[PQ]	Inorganic ion transport and metabolism;; Secondary metabolites biosynthesis, transport and catabolism	Ferric reductase NAD binding domain	Respiratory burst oxidase homolog protein A OS=Solanum tuberosum OX=4113 GN=RBOHA PE=1 SV=1	--	--	respiratory burst oxidase homolog protein A isoform X1 [Glycine max]	molecular function: catalytic activity (GO:0003824);; molecular function: antioxidant activity (GO:0016209);; biological process: metabolic process (GO:0008152);; biological process: cellular process (GO:0009987);; biological process: single-organism process (GO:0044699);; biological process: response to stimulus (GO:0050896);; biological process: detoxification (GO:0098754);; cellular component:…
gene-LOC100793316	1.20273	0.917289	1.15825	0.936539	0.917907	0.793458	0.00115725	1.15161	up	--	--	Molecular Function: protein binding (GO:0005515);; Cellular Component: cellular_component (GO:0005575);; Cellular Component: cell (GO:0005623);; Cellular Component: plasma membrane (GO:0005886);; Biological Process: cell communication (GO:0007154);; Biological Process: signal transduction (GO:0007165);; Biological Process: biological_process (GO:0008150);; Biological Process: response to radiatio…	K01866|4.0e-06|gra:105775527|K01866 tyrosyl-tRNA synthetase [EC:6.1.1.1] | (RefSeq) uncharacterized LOC105775527	Aminoacyl-tRNA biosynthesis (ko00970)	[R]	General function prediction only	Leucine rich repeat	Plant intracellular Ras-group-related LRR protein 4 OS=Arabidopsis thaliana OX=3702 GN=PIRL4 PE=1 SV=1	S	Function unknown	plant intracellular Ras-group-related LRR protein 4 [Glycine max]	molecular function: binding (GO:0005488);; cellular component: cell (GO:0005623);; cellular component: membrane (GO:0016020);; cellular component: cell part (GO:0044464);; biological process: cellular process (GO:0009987);; biological process: biological regulation (GO:0065007);; biological process: response to stimulus (GO:0050896);; biological process: signaling (GO:0023052)
gene-LOC100815570	65.656	75.4841	69.1349	73.024	59.4465	55.4572	1.49e-08	1.28812	up	[DPM]	Cell cycle control, cell division, chromosome partitioning;; Inorganic ion transport and metabolism;; Cell wall/membrane/envelope biogenesis	Molecular Function: ferroxidase activity (GO:0004322);; Molecular Function: copper ion binding (GO:0005507);; Cellular Component: plasma membrane (GO:0005886);; Biological Process: iron ion transport (GO:0006826);; Biological Process: iron ion homeostasis (GO:0055072);;	K19791|1.1e-194|han:110912433|K19791 iron transport multicopper oxidase | (RefSeq) L-ascorbate oxidase homolog	--	[Q]	Secondary metabolites biosynthesis, transport and catabolism	Multicopper oxidase	L-ascorbate oxidase homolog OS=Brassica napus OX=3708 GN=Bp10 PE=2 SV=1	Q	Secondary metabolites biosynthesis, transport and catabolism	L-ascorbate oxidase homolog [Glycine max]	molecular function: catalytic activity (GO:0003824);; biological process: metabolic process (GO:0008152);; biological process: single-organism process (GO:0044699);; molecular function: binding (GO:0005488);; cellular component: cell (GO:0005623);; cellular component: membrane (GO:0016020);; cellular component: cell part (GO:0044464);; biological process: localization (GO:0051179);; biological pr…
gene-LOC100815648	8.08786	8.0424	7.7166	0.36234	0.517649	0.504447	6.99e-16	-2.59216	down	[T]	Signal transduction mechanisms	Molecular Function: protein serine/threonine kinase activity (GO:0004674);; Molecular Function: ATP binding (GO:0005524);; Cellular Component: nucleus (GO:0005634);; Cellular Component: cytoplasm (GO:0005737);; Cellular Component: plasma membrane (GO:0005886);; Biological Process: protein phosphorylation (GO:0006468);;	K08286|9.1e-113|sbi:8057247|K08286 protein-serine/threonine kinase [EC:2.7.11.-] | (RefSeq) protein kinase PINOID	--	[R]	General function prediction only	Protein kinase domain	Protein kinase PINOID OS=Arabidopsis thaliana OX=3702 GN=PID PE=1 SV=1	T	Signal transduction mechanisms	protein kinase PINOID-like [Glycine max]	molecular function: catalytic activity (GO:0003824);; biological process: metabolic process (GO:0008152);; biological process: cellular process (GO:0009987);; molecular function: binding (GO:0005488);; cellular component: cell (GO:0005623);; cellular component: organelle (GO:0043226);; cellular component: cell part (GO:0044464);; cellular component: membrane (GO:0016020)
gene-LOC100815066	10.203	8.07411	11.2471	1.20487	0.506823	0.63481	3.8e-11	-2.17012	down	[M]	Cell wall/membrane/envelope biogenesis	Molecular Function: transmembrane receptor protein serine/threonine kinase activity (GO:0004675);; Molecular Function: ATP binding (GO:0005524);; Cellular Component: plasma membrane (GO:0005886);; Biological Process: protein phosphorylation (GO:0006468);; Cellular Component: integral component of membrane (GO:0016021);;	K13430|2.5e-41|sbi:8056791|K13430 serine/threonine-protein kinase PBS1 [EC:2.7.11.1] | (RefSeq) serine/threonine-protein kinase PBS1	Plant-pathogen interaction (ko04626)	[T]	Signal transduction mechanisms	Protein tyrosine and serine/threonine kinase	Probable leucine-rich repeat receptor-like protein kinase At5g49770 OS=Arabidopsis thaliana OX=3702 GN=At5g49770 PE=1 SV=1	T	Signal transduction mechanisms	probable serine/threonine-protein kinase PBL28 [Glycine max]	molecular function: catalytic activity (GO:0003824);; molecular function: signal transducer activity (GO:0004871);; molecular function: molecular transducer activity (GO:0060089);; biological process: metabolic process (GO:0008152);; biological process: cellular process (GO:0009987);; biological process: signaling (GO:0023052);; biological process: single-organism process (GO:0044699);; biologica…
gene-LOC100795669	6.04384	5.71449	5.53154	19.0414	18.2137	17.2442	2.79e-45	2.98134	up	[S]	Function unknown	Cellular Component: plasma membrane (GO:0005886);; Biological Process: response to iron ion (GO:0010039);; Cellular Component: membrane (GO:0016020);; Cellular Component: integral component of membrane (GO:0016021);; Biological Process: seed development (GO:0048316);; Molecular Function: iron-nicotianamine transmembrane transporter activity (GO:0051980);;	K15363|2.0e-52|bna:111210893|K15363 fanconi-associated nuclease 1 [EC:3.1.21.- 3.1.4.1] | (RefSeq) fanconi-associated nuclease 1 homolog	--	--	--	OPT oligopeptide transporter protein	Metal-nicotianamine transporter YSL3 OS=Arabidopsis thaliana OX=3702 GN=YSL3 PE=2 SV=1	S	Function unknown	metal-nicotianamine transporter YSL3 isoform X2 [Glycine max]	cellular component: cell (GO:0005623);; cellular component: membrane (GO:0016020);; cellular component: cell part (GO:0044464);; biological process: response to stimulus (GO:0050896);; cellular component: membrane part (GO:0044425);; biological process: reproduction (GO:0000003);; biological process: reproductive process (GO:0022414);; biological process: multicellular organismal process (GO:0032…
gene-LOC100787216	2.87369	2.99517	3.99802	4.60909	5.85637	4.54467	1.98e-10	2.07689	up	[T]	Signal transduction mechanisms	Molecular Function: protein serine/threonine kinase activity (GO:0004674);; Molecular Function: ATP binding (GO:0005524);; Cellular Component: nucleus (GO:0005634);; Cellular Component: cytoplasm (GO:0005737);; Cellular Component: plasma membrane (GO:0005886);; Biological Process: protein phosphorylation (GO:0006468);;	K08286|3.0e-279|gmx:100787216|K08286 protein-serine/threonine kinase [EC:2.7.11.-] | (RefSeq) protein kinase PINOID 2	--	[R]	General function prediction only	Protein kinase domain	Protein kinase PINOID 2 OS=Arabidopsis thaliana OX=3702 GN=PID2 PE=1 SV=1	T	Signal transduction mechanisms	protein kinase PINOID 2 [Glycine max]	molecular function: catalytic activity (GO:0003824);; biological process: metabolic process (GO:0008152);; biological process: cellular process (GO:0009987);; molecular function: binding (GO:0005488);; cellular component: cell (GO:0005623);; cellular component: organelle (GO:0043226);; cellular component: cell part (GO:0044464);; cellular component: membrane (GO:0016020)
--	1.10843	1.17678	1.74163	2.00156	2.31405	1.83542	7.31e-12	2.15952	up	--	--	Molecular Function: protein serine/threonine kinase activity (GO:0004674);; Molecular Function: ATP binding (GO:0005524);; Cellular Component: plasma membrane (GO:0005886);; Cellular Component: integral component of membrane (GO:0016021);; Biological Process: protein autophosphorylation (GO:0046777);;	K13418|2.8e-12|smo:SELMODRAFT_167872|K13418 somatic embryogenesis receptor kinase 1 [EC:2.7.10.1 2.7.11.1] | (RefSeq) hypothetical protein	--	[T]	Signal transduction mechanisms	SPARK	Probable receptor-like protein kinase At1g11050 OS=Arabidopsis thaliana OX=3702 GN=At1g11050 PE=2 SV=1	T	Signal transduction mechanisms	LOW QUALITY PROTEIN: hypothetical protein GLYMA_05G168800 [Glycine max]	molecular function: catalytic activity (GO:0003824);; biological process: metabolic process (GO:0008152);; biological process: cellular process (GO:0009987);; molecular function: binding (GO:0005488);; cellular component: cell (GO:0005623);; cellular component: membrane (GO:0016020);; cellular component: cell part (GO:0044464);; cellular component: membrane part (GO:0044425)
gene-LOC100778240	69.9387	148.954	72.6807	7.73785	8.76373	3.45823	4.58e-06	-2.31889	down	--	--	Biological Process: reproduction (GO:0000003);; Biological Process: developmental process involved in reproduction (GO:0003006);; Cellular Component: cellular_component (GO:0005575);; Cellular Component: cell (GO:0005623);; Cellular Component: plasma membrane (GO:0005886);; Biological Process: cell cycle (GO:0007049);; Biological Process: multicellular organism development (GO:0007275);; Biologic…	--	--	--	--	--	--	S	Function unknown	LOW QUALITY PROTEIN: lysine-rich arabinogalactan protein 18 [Glycine max]	biological process: reproduction (GO:0000003);; biological process: reproductive process (GO:0022414);; biological process: developmental process (GO:0032502);; cellular component: cell (GO:0005623);; cellular component: membrane (GO:0016020);; cellular component: cell part (GO:0044464);; biological process: cellular process (GO:0009987);; biological process: single-organism process (GO:0044699);…
gene-LOC100807225	0.297532	0.241848	0.599831	0.371599	0.625838	0.326267	0.00355531	1.69498	up	[O]	Posttranslational modification, protein turnover, chaperones	Molecular Function: protein serine/threonine kinase activity (GO:0004674);; Molecular Function: ATP binding (GO:0005524);; Cellular Component: plasma membrane (GO:0005886);; Cellular Component: integral component of membrane (GO:0016021);;	K00924|3.4e-81|smo:SELMODRAFT_83623|K00924 kinase [EC:2.7.1.-] | (RefSeq) hypothetical protein	--	--	--	Leucine rich repeat	Receptor-like protein kinase 2 OS=Arabidopsis thaliana OX=3702 GN=RCH2 PE=1 SV=1	T	Signal transduction mechanisms	receptor-like protein kinase 2 [Glycine max]	molecular function: catalytic activity (GO:0003824);; biological process: metabolic process (GO:0008152);; biological process: cellular process (GO:0009987);; molecular function: binding (GO:0005488);; cellular component: cell (GO:0005623);; cellular component: membrane (GO:0016020);; cellular component: cell part (GO:0044464);; cellular component: membrane part (GO:0044425)
gene-LOC100784621	7.1702	5.90588	7.76176	5.91697	6.21056	4.6988	4.09e-05	1.1696	up	[P]	Inorganic ion transport and metabolism	Molecular Function: magnesium ion binding (GO:0000287);; Molecular Function: ATP binding (GO:0005524);; Cellular Component: plasma membrane (GO:0005886);; Cellular Component: integral component of membrane (GO:0016021);; Biological Process: phospholipid translocation (GO:0045332);;	K01530|0.0e+00|gmx:100784621|K01530 phospholipid-translocating ATPase [EC:7.6.2.1] | (RefSeq) probable phospholipid-transporting ATPase 4 isoform X2	--	[R]	General function prediction only	Phospholipid-translocating P-type ATPase C-terminal	Probable phospholipid-transporting ATPase 4 OS=Arabidopsis thaliana OX=3702 GN=ALA4 PE=3 SV=2	P	Inorganic ion transport and metabolism	probable phospholipid-transporting ATPase 4 isoform X1 [Glycine max]	molecular function: binding (GO:0005488);; cellular component: cell (GO:0005623);; cellular component: membrane (GO:0016020);; cellular component: cell part (GO:0044464);; cellular component: membrane part (GO:0044425);; biological process: cellular process (GO:0009987);; biological process: single-organism process (GO:0044699);; biological process: localization (GO:0051179);; biological process:…
gene-LOC100776071	0.449747	1.02944	0.730722	1.58109	1.2224	1.95247	1.03e-08	2.47322	up	--	--	Cellular Component: plasma membrane (GO:0005886);;	--	--	--	--	--	Uncharacterized protein At4g15545 OS=Arabidopsis thaliana OX=3702 GN=At4g15545 PE=1 SV=1	--	--	uncharacterized protein At4g15545 [Glycine max]	cellular component: cell (GO:0005623);; cellular component: membrane (GO:0016020);; cellular component: cell part (GO:0044464)
gene-GMLAX11	20.9348	17.4521	20.3748	0.394951	0.485171	0.277672	5.08e-37	-4.12054	down	--	--	Biological Process: amino acid transmembrane transport (GO:0003333);; Cellular Component: plasma membrane (GO:0005886);; Molecular Function: amino acid transmembrane transporter activity (GO:0015171);; Cellular Component: integral component of membrane (GO:0016021);;	K13946|9.6e-283|gmx:100792491|K13946 auxin influx carrier (AUX1 LAX family) | (RefSeq) GMLAX11; auxin influx carrier LAX11	Plant hormone signal transduction (ko04075)	[E]	Amino acid transport and metabolism	Transmembrane amino acid transporter protein	Auxin transporter-like protein 1 OS=Medicago truncatula OX=3880 GN=LAX1 PE=2 SV=1	E	Amino acid transport and metabolism	hypothetical protein GLYMA_11G228300 [Glycine max]	biological process: single-organism process (GO:0044699);; biological process: localization (GO:0051179);; cellular component: cell (GO:0005623);; cellular component: membrane (GO:0016020);; cellular component: cell part (GO:0044464);; molecular function: transporter activity (GO:0005215);; cellular component: membrane part (GO:0044425)
gene-LOC100789174	15.6293	19.9143	17.3494	2.20679	2.79174	3.23314	0.000140811	-1.15085	down	--	--	Biological Process: microtubule cytoskeleton organization (GO:0000226);; Biological Process: cell morphogenesis (GO:0000902);; Biological Process: cell morphogenesis involved in differentiation (GO:0000904);; Molecular Function: molecular_function (GO:0003674);; Molecular Function: binding (GO:0005488);; Molecular Function: protein binding (GO:0005515);; Cellular Component: cellular_component (GO…	--	--	--	--	Filament-like plant protein, long coiled-coil	Filament-like plant protein 4 OS=Arabidopsis thaliana OX=3702 GN=FPP4 PE=1 SV=1	S	Function unknown	filament-like plant protein 4 [Glycine max]	biological process: cellular process (GO:0009987);; biological process: cellular component organization or biogenesis (GO:0071840);; biological process: developmental process (GO:0032502);; biological process: single-organism process (GO:0044699);; molecular function: binding (GO:0005488);; cellular component: cell (GO:0005623);; cellular component: membrane (GO:0016020);; cellular component: cel…
gene-LOC100781955	1.24483	0.768192	1.15107	0	0	0.007389	2.54e-09	-5.53777	down	[T]	Signal transduction mechanisms	Biological Process: defense response to oomycetes (GO:0002229);; Molecular Function: transmembrane receptor protein serine/threonine kinase activity (GO:0004675);; Molecular Function: ATP binding (GO:0005524);; Cellular Component: plasma membrane (GO:0005886);; Biological Process: defense response (GO:0006952);; Biological Process: defense response to bacterium (GO:0042742);;	K13416|4.3e-76|mdm:103416333|K13416 brassinosteroid insensitive 1-associated receptor kinase 1 [EC:2.7.10.1 2.7.11.1] | (RefSeq) BRASSINOSTEROID INSENSITIVE 1-associated receptor kinase 1-like isoform X1	MAPK signaling pathway - plant (ko04016);; Plant hormone signal transduction (ko04075);; Plant-pathogen interaction (ko04626)	[T]	Signal transduction mechanisms	Protein kinase domain	Receptor like protein kinase S.2 OS=Arabidopsis thaliana OX=3702 GN=LECRKS2 PE=2 SV=2	T	Signal transduction mechanisms	receptor like protein kinase S.2 [Glycine max]	biological process: response to stimulus (GO:0050896);; biological process: multi-organism process (GO:0051704);; molecular function: catalytic activity (GO:0003824);; molecular function: signal transducer activity (GO:0004871);; molecular function: molecular transducer activity (GO:0060089);; biological process: metabolic process (GO:0008152);; biological process: cellular process (GO:0009987);;…
gene-LOC100801347	3.67476	7.24289	4.02444	0.187396	0.128303	0	1.16e-06	-3.79399	down	[T]	Signal transduction mechanisms	Molecular Function: protein serine/threonine kinase activity (GO:0004674);; Molecular Function: ATP binding (GO:0005524);; Cellular Component: nucleus (GO:0005634);; Cellular Component: cytoplasm (GO:0005737);; Cellular Component: plasma membrane (GO:0005886);; Biological Process: protein phosphorylation (GO:0006468);;	K08286|2.9e-265|gmx:100801347|K08286 protein-serine/threonine kinase [EC:2.7.11.-] | (RefSeq) serine/threonine-protein kinase D6PKL3	--	[R]	General function prediction only	Protein kinase domain	Protein kinase G11A OS=Oryza sativa subsp. indica OX=39946 GN=OsI_021818 PE=2 SV=1	T	Signal transduction mechanisms	serine/threonine-protein kinase D6PKL3 [Glycine max]	molecular function: catalytic activity (GO:0003824);; biological process: metabolic process (GO:0008152);; biological process: cellular process (GO:0009987);; molecular function: binding (GO:0005488);; cellular component: cell (GO:0005623);; cellular component: organelle (GO:0043226);; cellular component: cell part (GO:0044464);; cellular component: membrane (GO:0016020)
gene-LOC100305414	4.86708	4.51122	4.54464	4.61776	6.16167	4.13438	2.32e-06	1.58312	up	[M]	Cell wall/membrane/envelope biogenesis	Molecular Function: protein kinase activity (GO:0004672);; Molecular Function: ATP binding (GO:0005524);; Cellular Component: plasma membrane (GO:0005886);; Cellular Component: plasmodesma (GO:0009506);; Cellular Component: integral component of membrane (GO:0016021);; Biological Process: protein autophosphorylation (GO:0046777);;	K13435|2.3e-119|spen:107018783|K13435 serine/threonine-protein kinase Pto | (RefSeq) receptor-like protein kinase HERK 1 isoform X2	Plant-pathogen interaction (ko04626)	[T]	Signal transduction mechanisms	Protein tyrosine and serine/threonine kinase	Receptor-like protein kinase HERK 1 OS=Arabidopsis thaliana OX=3702 GN=HERK1 PE=1 SV=1	T	Signal transduction mechanisms	protein kinase precursor [Glycine max]	molecular function: catalytic activity (GO:0003824);; biological process: metabolic process (GO:0008152);; biological process: cellular process (GO:0009987);; molecular function: binding (GO:0005488);; cellular component: cell (GO:0005623);; cellular component: membrane (GO:0016020);; cellular component: cell part (GO:0044464);; cellular component: cell junction (GO:0030054);; cellular component:…
gene-LOC100784348	38.365	31.4556	40.7184	29.4754	34.851	24.9574	8.49e-05	1.18298	up	--	--	Biological Process: response to acid chemical (GO:0001101);; Molecular Function: protein binding (GO:0005515);; Cellular Component: cellular_component (GO:0005575);; Cellular Component: intracellular (GO:0005622);; Cellular Component: cell (GO:0005623);; Cellular Component: nucleus (GO:0005634);; Cellular Component: cytoplasm (GO:0005737);; Cellular Component: plasma membrane (GO:0005886);; Biolo…	K23330|5.6e-21|ccp:CHC_T00004048001|K23330 leucine-zipper-like transcriptional regulator 1 | (RefSeq) hypothetical protein	--	[S]	Function unknown	Armadillo/beta-catenin-like repeat	ARM REPEAT PROTEIN INTERACTING WITH ABF2 OS=Arabidopsis thaliana OX=3702 GN=ARIA PE=1 SV=2	S	Function unknown	ARM REPEAT PROTEIN INTERACTING WITH ABF2 isoform X1 [Glycine max]	biological process: response to stimulus (GO:0050896);; molecular function: binding (GO:0005488);; cellular component: cell (GO:0005623);; cellular component: cell part (GO:0044464);; cellular component: organelle (GO:0043226);; cellular component: membrane (GO:0016020);; biological process: biological regulation (GO:0065007)
gene-LOC100794888	2.82655	3.16998	2.28849	0.270296	0.362398	0.494684	0.000630422	-1.37313	down	[R]	General function prediction only	Biological Process: karyogamy (GO:0000741);; Molecular Function: molecular_function (GO:0003674);; Molecular Function: catalytic activity (GO:0003824);; Molecular Function: ubiquitin-protein transferase activity (GO:0004842);; Cellular Component: cellular_component (GO:0005575);; Cellular Component: cell (GO:0005623);; Cellular Component: plasma membrane (GO:0005886);; Cellular Component: cell-ce…	--	--	--	--	von Willebrand factor type A domain	Probable E3 ubiquitin-protein ligase EDA40 OS=Arabidopsis thaliana OX=3702 GN=EDA40 PE=2 SV=1	O	Posttranslational modification, protein turnover, chaperones	probable E3 ubiquitin-protein ligase EDA40 [Glycine max]	biological process: cellular process (GO:0009987);; biological process: cellular component organization or biogenesis (GO:0071840);; molecular function: catalytic activity (GO:0003824);; cellular component: cell (GO:0005623);; cellular component: membrane (GO:0016020);; cellular component: cell part (GO:0044464);; cellular component: cell junction (GO:0030054);; biological process: metabolic proc…
gene-LOC100793242	77.6856	93.3837	78.4026	4.52293	2.52477	1.58011	1.09e-18	-3.36209	down	[G]	Carbohydrate transport and metabolism	Cellular Component: vacuole (GO:0005773);; Cellular Component: plasma membrane (GO:0005886);; Biological Process: response to water deprivation (GO:0009414);; Cellular Component: plasmodesma (GO:0009506);; Molecular Function: water channel activity (GO:0015250);; Cellular Component: integral component of membrane (GO:0016021);;	K09872|4.6e-163|gmx:100793242|K09872 aquaporin PIP | (RefSeq) uncharacterized protein LOC100793242	--	[G]	Carbohydrate transport and metabolism	Major intrinsic protein	Probable aquaporin PIP1-2 OS=Oryza sativa subsp. japonica OX=39947 GN=PIP1-2 PE=2 SV=3	G	Carbohydrate transport and metabolism	aquaporin PIP1-5 [Glycine max]	cellular component: cell (GO:0005623);; cellular component: organelle (GO:0043226);; cellular component: cell part (GO:0044464);; cellular component: membrane (GO:0016020);; biological process: response to stimulus (GO:0050896);; cellular component: cell junction (GO:0030054);; molecular function: transporter activity (GO:0005215);; biological process: single-organism process (GO:0044699);; biolo…
gene-LOC100795732	25.4832	33.3819	24.5358	3.55815	1.77106	2.24326	5.01e-13	-2.15282	down	[M]	Cell wall/membrane/envelope biogenesis	Molecular Function: protein kinase activity (GO:0004672);; Molecular Function: ATP binding (GO:0005524);; Cellular Component: plasma membrane (GO:0005886);; Biological Process: hormone-mediated signaling pathway (GO:0009755);; Cellular Component: integral component of membrane (GO:0016021);;	K13415|1.1e-80|sbi:8078161|K13415 protein brassinosteroid insensitive 1 [EC:2.7.10.1 2.7.11.1] | (RefSeq) brassinosteroid LRR receptor kinase BRI1	Plant hormone signal transduction (ko04075)	--	--	Protein kinase domain	MDIS1-interacting receptor like kinase 2 OS=Arabidopsis thaliana OX=3702 GN=MIK2 PE=1 SV=3	T	Signal transduction mechanisms	MDIS1-interacting receptor like kinase 2 isoform X1 [Glycine max]	molecular function: catalytic activity (GO:0003824);; biological process: metabolic process (GO:0008152);; biological process: cellular process (GO:0009987);; molecular function: binding (GO:0005488);; cellular component: cell (GO:0005623);; cellular component: membrane (GO:0016020);; cellular component: cell part (GO:0044464);; biological process: signaling (GO:0023052);; biological process: sin…
gene-LOC100811114	10.0795	17.2297	10.6246	0.029215	0.134719	0.339585	3.17e-14	-4.56339	down	--	--	Cellular Component: plasma membrane (GO:0005886);; Cellular Component: integral component of membrane (GO:0016021);; Molecular Function: transmembrane transporter activity (GO:0022857);;	K17500|3.3e-55|nto:104085001|K17500 integrin-linked kinase-associated serine/threonine phosphatase 2C [EC:3.1.3.16] | (RefSeq) WAT1-related protein At3g18200 isoform X1	--	--	--	EamA-like transporter family	WAT1-related protein At4g08300 OS=Arabidopsis thaliana OX=3702 GN=At4g08300 PE=2 SV=1	S	Function unknown	uncharacterized protein LOC100811114 [Glycine max]	cellular component: cell (GO:0005623);; cellular component: membrane (GO:0016020);; cellular component: cell part (GO:0044464);; cellular component: membrane part (GO:0044425);; molecular function: transporter activity (GO:0005215);; biological process: localization (GO:0051179)
gene-LOC100800924	0.979606	1.05946	0.916051	0	0.014225	0.012588	5.61e-10	-4.85206	down	[M]	Cell wall/membrane/envelope biogenesis	Molecular Function: protein kinase activity (GO:0004672);; Molecular Function: ATP binding (GO:0005524);; Cellular Component: plasma membrane (GO:0005886);; Biological Process: hormone-mediated signaling pathway (GO:0009755);; Cellular Component: integral component of membrane (GO:0016021);;	K13415|1.1e-81|sbi:8078161|K13415 protein brassinosteroid insensitive 1 [EC:2.7.10.1 2.7.11.1] | (RefSeq) brassinosteroid LRR receptor kinase BRI1	Plant hormone signal transduction (ko04075)	--	--	Protein kinase domain	MDIS1-interacting receptor like kinase 2 OS=Arabidopsis thaliana OX=3702 GN=MIK2 PE=1 SV=3	T	Signal transduction mechanisms	MDIS1-interacting receptor like kinase 2 [Glycine max]	molecular function: catalytic activity (GO:0003824);; biological process: metabolic process (GO:0008152);; biological process: cellular process (GO:0009987);; molecular function: binding (GO:0005488);; cellular component: cell (GO:0005623);; cellular component: membrane (GO:0016020);; cellular component: cell part (GO:0044464);; biological process: signaling (GO:0023052);; biological process: sin…
gene-LOC100527524	0.440075	0.534991	0.179905	0.462816	0.852953	0.728291	0.000828218	2.12219	up	--	--	Cellular Component: vacuolar membrane (GO:0005774);; Cellular Component: plasma membrane (GO:0005886);; Molecular Function: actin filament binding (GO:0051015);;	--	--	--	--	KIP1-like protein	Protein NETWORKED 3A OS=Arabidopsis thaliana OX=3702 GN=NET3A PE=2 SV=1	S	Function unknown	KIP1 domain-containing protein [Glycine max]	cellular component: cell (GO:0005623);; cellular component: membrane (GO:0016020);; cellular component: organelle (GO:0043226);; cellular component: organelle part (GO:0044422);; cellular component: cell part (GO:0044464);; molecular function: binding (GO:0005488)
gene-LOC100784955	2.30378	2.08985	2.53627	2.43166	2.86296	1.64236	4.54e-05	1.48979	up	[M]	Cell wall/membrane/envelope biogenesis	Molecular Function: protein serine/threonine kinase activity (GO:0004674);; Molecular Function: ATP binding (GO:0005524);; Cellular Component: nucleus (GO:0005634);; Cellular Component: cytoplasm (GO:0005737);; Cellular Component: plasma membrane (GO:0005886);; Biological Process: protein phosphorylation (GO:0006468);;	K08286|7.7e-203|tcc:18598189|K08286 protein-serine/threonine kinase [EC:2.7.11.-] | (RefSeq) serine/threonine-protein kinase KIPK	--	[R]	General function prediction only	Protein kinase domain	Serine/threonine-protein kinase KIPK2 OS=Arabidopsis thaliana OX=3702 GN=KIPK2 PE=1 SV=1	T	Signal transduction mechanisms	serine/threonine-protein kinase D6PKL1 [Glycine max]	molecular function: catalytic activity (GO:0003824);; biological process: metabolic process (GO:0008152);; biological process: cellular process (GO:0009987);; molecular function: binding (GO:0005488);; cellular component: cell (GO:0005623);; cellular component: organelle (GO:0043226);; cellular component: cell part (GO:0044464);; cellular component: membrane (GO:0016020)
gene-LOC100806335	15.8073	24.9041	16.6138	0.175895	0.172537	0.689898	5.99e-17	-4.22605	down	--	--	Biological Process: amino acid transmembrane transport (GO:0003333);; Cellular Component: plasma membrane (GO:0005886);; Molecular Function: amino acid transmembrane transporter activity (GO:0015171);; Cellular Component: integral component of membrane (GO:0016021);;	K14209|9.4e-12|cmax:111478243|K14209 solute carrier family 36 (proton-coupled amino acid transporter) | (RefSeq) amino acid transporter ANT1 isoform X1	--	[E]	Amino acid transport and metabolism	Transmembrane amino acid transporter protein	Amino acid permease 6 OS=Arabidopsis thaliana OX=3702 GN=AAP6 PE=1 SV=1	E	Amino acid transport and metabolism	amino acid permease 6 [Glycine max]	biological process: single-organism process (GO:0044699);; biological process: localization (GO:0051179);; cellular component: cell (GO:0005623);; cellular component: membrane (GO:0016020);; cellular component: cell part (GO:0044464);; molecular function: transporter activity (GO:0005215);; cellular component: membrane part (GO:0044425)
gene-LOC100806650	19.2593	23.3856	19.2873	0.308549	0.153543	0.207725	7.48e-62	-5.00479	down	--		Molecular Function: transmembrane receptor protein serine/threonine kinase activity (GO:0004675);; Molecular Function: ATP binding (GO:0005524);; Cellular Component: plasma membrane (GO:0005886);; Biological Process: protein phosphorylation (GO:0006468);; Cellular Component: integral component of membrane (GO:0016021);;	K13418|2.1e-157|ppp:112278174|K13418 somatic embryogenesis receptor kinase 1 [EC:2.7.10.1 2.7.11.1] | (RefSeq) LRR receptor kinase BAK1-like	--	--	--	Protein kinase domain	Protein NSP-INTERACTING KINASE 1 OS=Arabidopsis thaliana OX=3702 GN=NIK1 PE=1 SV=1	T	Signal transduction mechanisms	protein NSP-INTERACTING KINASE 1 [Glycine max]	molecular function: catalytic activity (GO:0003824);; molecular function: signal transducer activity (GO:0004871);; molecular function: molecular transducer activity (GO:0060089);; biological process: metabolic process (GO:0008152);; biological process: cellular process (GO:0009987);; biological process: signaling (GO:0023052);; biological process: single-organism process (GO:0044699);; biologica…
gene-LOC100789189	2.58445	3.49911	3.68009	0.116458	0	0.151074	9.17e-09	-3.6407	down	[M]	Cell wall/membrane/envelope biogenesis	Molecular Function: transmembrane receptor protein serine/threonine kinase activity (GO:0004675);; Molecular Function: ATP binding (GO:0005524);; Cellular Component: plasma membrane (GO:0005886);; Biological Process: protein phosphorylation (GO:0006468);;	K13430|1.8e-74|nta:107764193|K13430 serine/threonine-protein kinase PBS1 [EC:2.7.11.1] | (RefSeq) serine/threonine-protein kinase PBS1-like	Plant-pathogen interaction (ko04626)	--	--	Protein kinase domain	Putative proline-rich receptor-like protein kinase PERK11 OS=Arabidopsis thaliana OX=3702 GN=PERK11 PE=2 SV=2	T	Signal transduction mechanisms	PTI1-like tyrosine-protein kinase 2 [Glycine max]	molecular function: catalytic activity (GO:0003824);; molecular function: signal transducer activity (GO:0004871);; molecular function: molecular transducer activity (GO:0060089);; biological process: metabolic process (GO:0008152);; biological process: cellular process (GO:0009987);; biological process: signaling (GO:0023052);; biological process: single-organism process (GO:0044699);; biologica…
gene-LOC100813139	1.6267	2.1097	1.36724	0.1206	0.208648	0.047603	0.000544862	-2.1094	down	[T]	Signal transduction mechanisms	Molecular Function: protein serine/threonine kinase activity (GO:0004674);; Molecular Function: ATP binding (GO:0005524);; Cellular Component: plasma membrane (GO:0005886);; Cellular Component: integral component of membrane (GO:0016021);;	K00924|1.7e-69|smo:SELMODRAFT_83623|K00924 kinase [EC:2.7.1.-] | (RefSeq) hypothetical protein	--	--	--	Leucine rich repeat	LRR receptor-like serine/threonine-protein kinase OS=Arabidopsis thaliana OX=3702 GN=RGI3 PE=1 SV=1	T	Signal transduction mechanisms	LRR receptor-like serine/threonine-protein kinase [Glycine max]	molecular function: catalytic activity (GO:0003824);; biological process: metabolic process (GO:0008152);; biological process: cellular process (GO:0009987);; molecular function: binding (GO:0005488);; cellular component: cell (GO:0005623);; cellular component: membrane (GO:0016020);; cellular component: cell part (GO:0044464);; cellular component: membrane part (GO:0044425)
gene-LOC100527623	13.812	5.29673	16.9264	23.0649	9.68622	16.0084	1.33e-05	1.83433	up	[T]	Signal transduction mechanisms	Molecular Function: nucleotide binding (GO:0000166);; Molecular Function: molecular_function (GO:0003674);; Molecular Function: binding (GO:0005488);; Cellular Component: cellular_component (GO:0005575);; Cellular Component: cell (GO:0005623);; Cellular Component: plasma membrane (GO:0005886);; Molecular Function: drug binding (GO:0008144);; Cellular Component: membrane (GO:0016020);; Molecular F…	--	--	--	--	Universal stress protein family	--	T	Signal transduction mechanisms	uncharacterized protein LOC100527623 isoform X1 [Glycine max]	molecular function: binding (GO:0005488);; cellular component: cell (GO:0005623);; cellular component: membrane (GO:0016020);; cellular component: cell part (GO:0044464)
gene-GMSWEET4	1.09016	0.844626	0.759807	4.45441	2.99354	9.42096	2.51e-20	3.9582	up	--	--	Cellular Component: plasma membrane (GO:0005886);; Biological Process: carbohydrate transport (GO:0008643);; Cellular Component: integral component of membrane (GO:0016021);; Molecular Function: sugar transmembrane transporter activity (GO:0051119);;	K15382|7.1e-139|gmx:100790580|K15382 solute carrier family 50 (sugar transporter) | (RefSeq) GMSWEET4; sugar efflux transporter SWEET4	--	[R]	General function prediction only	Sugar efflux transporter for intercellular exchange	Bidirectional sugar transporter SWEET14 OS=Oryza sativa subsp. indica OX=39946 GN=SWEET14 PE=2 SV=1	U	Intracellular trafficking, secretion, and vesicular transport	sugar efflux transporter SWEET4 [Glycine max]	cellular component: cell (GO:0005623);; cellular component: membrane (GO:0016020);; cellular component: cell part (GO:0044464);; biological process: single-organism process (GO:0044699);; biological process: localization (GO:0051179);; cellular component: membrane part (GO:0044425);; molecular function: transporter activity (GO:0005215)
gene-LOC100306316	6.33995	11.2854	6.62701	0	0	0	2.98e-11	-7.7694	down	--	--	Cellular Component: plasma membrane (GO:0005886);; Cellular Component: integral component of membrane (GO:0016021);; Molecular Function: 4 iron, 4 sulfur cluster binding (GO:0051539);;	--	--	--	--	Domain of unknown function (DUF588)	CASP-like protein 2A1 OS=Glycine max OX=3847 PE=2 SV=1	S	Function unknown	CASP-like protein 2A1 [Glycine max]	cellular component: cell (GO:0005623);; cellular component: membrane (GO:0016020);; cellular component: cell part (GO:0044464);; cellular component: membrane part (GO:0044425);; molecular function: binding (GO:0005488)
gene-LOC100811148	2.64388	2.02187	2.82796	0.048876	0.017435	0.087183	7.22e-16	-4.0172	down	[NW]	Cell motility;; Extracellular structures	Molecular Function: protein serine/threonine kinase activity (GO:0004674);; Molecular Function: ATP binding (GO:0005524);; Cellular Component: plasma membrane (GO:0005886);; Biological Process: protein phosphorylation (GO:0006468);; Cellular Component: integral component of membrane (GO:0016021);; Biological Process: recognition of pollen (GO:0048544);;	K24104|3.5e-78|thj:104799061|K24104 GPN-loop GTPase | (RefSeq) LOW QUALITY PROTEIN: uncharacterized protein LOC104799061	--	--	--	Protein tyrosine and serine/threonine kinase	G-type lectin S-receptor-like serine/threonine-protein kinase At1g11300 OS=Arabidopsis thaliana OX=3702 GN=At1g11300 PE=2 SV=1	T	Signal transduction mechanisms	G-type lectin S-receptor-like serine/threonine-protein kinase At1g11300 [Glycine max]	molecular function: catalytic activity (GO:0003824);; biological process: metabolic process (GO:0008152);; biological process: cellular process (GO:0009987);; molecular function: binding (GO:0005488);; cellular component: cell (GO:0005623);; cellular component: membrane (GO:0016020);; cellular component: cell part (GO:0044464);; cellular component: membrane part (GO:0044425);; biological process:…
gene-LOC100819441	3.20838	2.84188	2.17557	0	0	0.071098	1.66e-08	-4.76972	down	--	--	Cellular Component: plasma membrane (GO:0005886);;	--	--	--	--	Domain of unknown function (DUF4228)	Uncharacterized protein At1g66480 OS=Arabidopsis thaliana OX=3702 GN=At1g66480 PE=2 SV=1	S	Function unknown	uncharacterized protein At1g66480 [Glycine max]	cellular component: cell (GO:0005623);; cellular component: membrane (GO:0016020);; cellular component: cell part (GO:0044464)
gene-LOC100819832	11.7338	9.94222	11.0735	8.1101	9.79619	6.57254	0.000816663	1.06527	up	--	--	Biological Process: response to acid chemical (GO:0001101);; Molecular Function: protein binding (GO:0005515);; Cellular Component: cellular_component (GO:0005575);; Cellular Component: intracellular (GO:0005622);; Cellular Component: cell (GO:0005623);; Cellular Component: nucleus (GO:0005634);; Cellular Component: cytoplasm (GO:0005737);; Cellular Component: plasma membrane (GO:0005886);; Biolo…	K23330|7.4e-21|ccp:CHC_T00004048001|K23330 leucine-zipper-like transcriptional regulator 1 | (RefSeq) hypothetical protein	--	[S]	Function unknown	Armadillo/beta-catenin-like repeat	ARM REPEAT PROTEIN INTERACTING WITH ABF2 OS=Arabidopsis thaliana OX=3702 GN=ARIA PE=1 SV=2	S	Function unknown	ARM REPEAT PROTEIN INTERACTING WITH ABF2 isoform X1 [Glycine max]	biological process: response to stimulus (GO:0050896);; molecular function: binding (GO:0005488);; cellular component: cell (GO:0005623);; cellular component: cell part (GO:0044464);; cellular component: organelle (GO:0043226);; cellular component: membrane (GO:0016020);; biological process: biological regulation (GO:0065007)
gene-LOC100305699	136.719	74.4056	137.696	13.9235	8.61958	32.3481	0.00942379	-1.22716	down	--	--	Biological Process: reproduction (GO:0000003);; Biological Process: developmental process involved in reproduction (GO:0003006);; Cellular Component: cellular_component (GO:0005575);; Cellular Component: cell (GO:0005623);; Cellular Component: plasma membrane (GO:0005886);; Biological Process: chemotaxis (GO:0006935);; Biological Process: biological_process (GO:0008150);; Biological Process: cell…	K11584|6.2e-32|dcr:108200982|K11584 serine/threonine-protein phosphatase 2A regulatory subunit B' | (RefSeq) serine/threonine protein phosphatase 2A 57 kDa regulatory subunit B' beta isoform-like	mRNA surveillance pathway (ko03015)	--	--	--	GPI-anchored protein LLG1 OS=Arabidopsis thaliana OX=3702 GN=LLG1 PE=1 SV=1	S	Function unknown	uncharacterized protein LOC100305699 precursor [Glycine max]	biological process: reproduction (GO:0000003);; biological process: reproductive process (GO:0022414);; biological process: developmental process (GO:0032502);; cellular component: cell (GO:0005623);; cellular component: membrane (GO:0016020);; cellular component: cell part (GO:0044464);; biological process: locomotion (GO:0040011);; biological process: response to stimulus (GO:0050896);; biologi…
gene-LOC100779692	11.7632	11.1633	11.136	0	0	0	1.77e-20	-9.73107	down	[T]	Signal transduction mechanisms	Cellular Component: plasma membrane (GO:0005886);; Cellular Component: integral component of membrane (GO:0016021);; Molecular Function: oxidoreductase activity (GO:0016491);; Biological Process: oxidation-reduction process (GO:0055114);;	K00521|0.0e+00|gmx:100779692|K00521 ferric-chelate reductase [EC:1.16.1.7] | (RefSeq) ferric reduction oxidase 2	--	[PQ]	Inorganic ion transport and metabolism;; Secondary metabolites biosynthesis, transport and catabolism	Ferric reductase NAD binding domain	Ferric reduction oxidase 2 OS=Arabidopsis thaliana OX=3702 GN=FRO2 PE=1 SV=2	--	--	ferric reduction oxidase 2 [Glycine max]	cellular component: cell (GO:0005623);; cellular component: membrane (GO:0016020);; cellular component: cell part (GO:0044464);; cellular component: membrane part (GO:0044425);; molecular function: catalytic activity (GO:0003824);; biological process: metabolic process (GO:0008152);; biological process: single-organism process (GO:0044699)
gene-LOC100780817	0.612892	0.136547	0.498654	0.685456	0.545452	0.370787	0.00394024	1.81365	up	[N]	Cell motility	Cellular Component: Golgi apparatus (GO:0005794);; Cellular Component: trans-Golgi network (GO:0005802);; Cellular Component: plasma membrane (GO:0005886);; Biological Process: plant-type primary cell wall biogenesis (GO:0009833);; Cellular Component: integral component of membrane (GO:0016021);; Molecular Function: cellulose synthase activity (GO:0016759);; Molecular Function: cellulose synthase…	K10891|3.7e-164|tcc:18612304|K10891 fanconi anemia group D2 protein | (RefSeq) Fanconi anemia group D2 protein homolog	--	--	--	Cellulose synthase	Cellulose synthase-like protein H1 OS=Oryza sativa subsp. japonica OX=39947 GN=CSLH1 PE=2 SV=2	G	Carbohydrate transport and metabolism	cellulose synthase-like protein H1 isoform X1 [Glycine max]	cellular component: cell (GO:0005623);; cellular component: organelle (GO:0043226);; cellular component: cell part (GO:0044464);; cellular component: organelle part (GO:0044422);; cellular component: membrane (GO:0016020);; biological process: cellular process (GO:0009987);; biological process: single-organism process (GO:0044699);; biological process: cellular component organization or biogenesi…
gene-LOC100788443	0.304279	0.172985	0.408264	0.319611	0.449452	0.20554	0.00759757	1.60984	up	--	--	Cellular Component: plasma membrane (GO:0005886);; Cellular Component: integral component of membrane (GO:0016021);;	K13428|5.1e-08|bna:106371753|K13428 LRR receptor-like serine/threonine-protein kinase EFR [EC:2.7.11.1] | (RefSeq) LRR receptor-like serine/threonine-protein kinase EFR	Plant-pathogen interaction (ko04626)	--	--	Leucine rich repeat	Phytosulfokine receptor 1 OS=Arabidopsis thaliana OX=3702 GN=PSKR1 PE=1 SV=4	S	Function unknown	phytosulfokine receptor 1 [Glycine max]	cellular component: cell (GO:0005623);; cellular component: membrane (GO:0016020);; cellular component: cell part (GO:0044464);; cellular component: membrane part (GO:0044425)
gene-LOC100794163	9.83191	7.6696	11.144	0.551427	0.297376	1.09502	1.09e-08	-2.4239	down	[E]	Amino acid transport and metabolism	Cellular Component: plasma membrane (GO:0005886);; Biological Process: amino acid transport (GO:0006865);; Molecular Function: amino acid transmembrane transporter activity (GO:0015171);; Molecular Function: L-lysine transmembrane transporter activity (GO:0015189);; Cellular Component: integral component of membrane (GO:0016021);;	K03294|0.0e+00|gmx:100794163|K03294 basic amino acid/polyamine antiporter, APA family | (RefSeq) cationic amino acid transporter 1	--	[E]	Amino acid transport and metabolism	Amino acid permease	Cationic amino acid transporter 1 OS=Arabidopsis thaliana OX=3702 GN=CAT1 PE=1 SV=1	E	Amino acid transport and metabolism	cationic amino acid transporter 1 [Glycine max]	cellular component: cell (GO:0005623);; cellular component: membrane (GO:0016020);; cellular component: cell part (GO:0044464);; biological process: single-organism process (GO:0044699);; biological process: localization (GO:0051179);; molecular function: transporter activity (GO:0005215);; cellular component: membrane part (GO:0044425)
gene-LOC100806987	8.74699	9.08173	8.45768	1.20649	1.18036	1.02585	1.97e-09	-1.4646	down	--	--	Cellular Component: plasma membrane (GO:0005886);; Molecular Function: actin filament binding (GO:0051015);;	--	--	--	--	KIP1-like protein	Protein NETWORKED 1D OS=Arabidopsis thaliana OX=3702 GN=NET1D PE=3 SV=1	S	Function unknown	protein NETWORKED 1D isoform X1 [Glycine max]	cellular component: cell (GO:0005623);; cellular component: membrane (GO:0016020);; cellular component: cell part (GO:0044464);; molecular function: binding (GO:0005488)
gene-LOC100798442	6.26213	3.90255	5.94078	10.2682	8.67594	7.49677	1.82e-14	2.17097	up	--	--	Biological Process: reproduction (GO:0000003);; Biological Process: negative regulation of transcription from RNA polymerase II promoter (GO:0000122);; Biological Process: embryonic axis specification (GO:0000578);; Biological Process: cell morphogenesis (GO:0000902);; Biological Process: eye development (GO:0001654);; Biological Process: urogenital system development (GO:0001655);; Biological Pr…	K01866|4.1e-13|gra:105775527|K01866 tyrosyl-tRNA synthetase [EC:6.1.1.1] | (RefSeq) uncharacterized LOC105775527	Aminoacyl-tRNA biosynthesis (ko00970)	[R]	General function prediction only	Leucine rich repeat	Plant intracellular Ras-group-related LRR protein 5 OS=Oryza sativa subsp. japonica OX=39947 GN=IRL5 PE=2 SV=1	S	Function unknown	plant intracellular Ras-group-related LRR protein 5 [Glycine max]	biological process: reproduction (GO:0000003);; biological process: biological regulation (GO:0065007);; biological process: multicellular organismal process (GO:0032501);; biological process: developmental process (GO:0032502);; biological process: single-organism process (GO:0044699);; biological process: cellular process (GO:0009987);; biological process: cellular component organization or bio…
gene-LOC100798862	16.3962	13.0768	15.2484	2.2884	2.95751	1.96062	0.000974173	-1.12077	down	--	--	Cellular Component: cellular_component (GO:0005575);; Cellular Component: cell (GO:0005623);; Cellular Component: plasma membrane (GO:0005886);; Cellular Component: membrane (GO:0016020);; Cellular Component: cell part (GO:0044464);; Cellular Component: cell periphery (GO:0071944);;	--	--	--	--	--	Interactor of constitutive active ROPs 3 OS=Arabidopsis thaliana OX=3702 GN=ICR3 PE=1 SV=1	S	Function unknown	interactor of constitutive active ROPs 3 isoform X2 [Glycine max]	cellular component: cell (GO:0005623);; cellular component: membrane (GO:0016020);; cellular component: cell part (GO:0044464)
gene-LOC100809298	3.23533	1.61582	3.17419	2.84504	1.3781	2.83395	0.00118365	1.16956	up	--		Molecular Function: transmembrane receptor protein serine/threonine kinase activity (GO:0004675);; Molecular Function: ATP binding (GO:0005524);; Cellular Component: plasma membrane (GO:0005886);; Biological Process: protein phosphorylation (GO:0006468);;	K13430|7.9e-241|gmx:100809298|K13430 serine/threonine-protein kinase PBS1 [EC:2.7.11.1] | (RefSeq) probable serine/threonine-protein kinase PBL7 isoform X1	Plant-pathogen interaction (ko04626)	[T]	Signal transduction mechanisms	Protein kinase domain	Serine/threonine-protein kinase PBS1 OS=Arabidopsis thaliana OX=3702 GN=PBS1 PE=1 SV=1	T	Signal transduction mechanisms	probable serine/threonine-protein kinase PBL7 isoform X1 [Glycine max]	molecular function: catalytic activity (GO:0003824);; molecular function: signal transducer activity (GO:0004871);; molecular function: molecular transducer activity (GO:0060089);; biological process: metabolic process (GO:0008152);; biological process: cellular process (GO:0009987);; biological process: signaling (GO:0023052);; biological process: single-organism process (GO:0044699);; biologica…
gene-LOC100794347	3.79677	5.97044	3.33972	0.067632	0.24263	0.179439	8.17e-08	-3.08158	down	[IQR]	Lipid transport and metabolism;; Secondary metabolites biosynthesis, transport and catabolism;; General function prediction only	Molecular Function: molecular_function (GO:0003674);; Molecular Function: catalytic activity (GO:0003824);; Cellular Component: cellular_component (GO:0005575);; Cellular Component: intracellular (GO:0005622);; Cellular Component: cell (GO:0005623);; Cellular Component: cytoplasm (GO:0005737);; Cellular Component: plasma membrane (GO:0005886);; Biological Process: biological_process (GO:0008150);…	K19329|1.7e-76|smo:SELMODRAFT_85319|K19329 WW domain-containing oxidoreductase | (RefSeq) hypothetical protein	--	[Q]	Secondary metabolites biosynthesis, transport and catabolism	short chain dehydrogenase	Short-chain dehydrogenase TIC 32 A, chloroplastic OS=Brassica napus OX=3708 GN=TIC32A PE=2 SV=1	Q	Secondary metabolites biosynthesis, transport and catabolism	short-chain dehydrogenase TIC 32, chloroplastic [Glycine max]	molecular function: catalytic activity (GO:0003824);; cellular component: cell (GO:0005623);; cellular component: cell part (GO:0044464);; cellular component: membrane (GO:0016020);; biological process: metabolic process (GO:0008152);; cellular component: organelle (GO:0043226);; cellular component: organelle part (GO:0044422);; biological process: single-organism process (GO:0044699)
gene-LOC100779472	0.994957	0.713741	0.973986	0.097426	0.102953	0.101371	9.78e-06	-1.63471	down	--	--	Cellular Component: 1,3-beta-D-glucan synthase complex (GO:0000148);; Molecular Function: 1,3-beta-D-glucan synthase activity (GO:0003843);; Cellular Component: plasma membrane (GO:0005886);; Biological Process: (1->3)-beta-D-glucan biosynthetic process (GO:0006075);; Cellular Component: integral component of membrane (GO:0016021);; Molecular Function: glucosyltransferase activity (GO:0046527);;	K11000|0.0e+00|gmx:100779472|K11000 callose synthase [EC:2.4.1.-] | (RefSeq) callose synthase 5	--	[M]	Cell wall/membrane/envelope biogenesis	1,3-beta-glucan synthase component	Callose synthase 5 OS=Arabidopsis thaliana OX=3702 GN=CALS5 PE=1 SV=1	M	Cell wall/membrane/envelope biogenesis	callose synthase 5 [Glycine max]	cellular component: cell (GO:0005623);; cellular component: membrane (GO:0016020);; cellular component: macromolecular complex (GO:0032991);; cellular component: membrane part (GO:0044425);; cellular component: cell part (GO:0044464);; molecular function: catalytic activity (GO:0003824);; biological process: metabolic process (GO:0008152);; biological process: cellular process (GO:0009987);; biol…
gene-LOC100785258	3.32541	3.75604	3.27307	0.056791	0.044774	0.042907	2e-26	-4.53906	down	[ET]	Amino acid transport and metabolism;; Signal transduction mechanisms	Cellular Component: plasma membrane (GO:0005886);; Molecular Function: ligand-gated ion channel activity (GO:0015276);; Cellular Component: integral component of membrane (GO:0016021);; Molecular Function: signaling receptor activity (GO:0038023);;	K05387|0.0e+00|gmx:100785258|K05387 glutamate receptor, ionotropic, plant | (RefSeq) glutamate receptor 3.6 isoform X1	--	[PET]	Inorganic ion transport and metabolism;; Amino acid transport and metabolism;; Signal transduction mechanisms	Receptor family ligand binding region	Glutamate receptor 3.6 OS=Arabidopsis thaliana OX=3702 GN=GLR3.6 PE=2 SV=1	--	--	glutamate receptor 3.6 isoform X1 [Glycine max]	cellular component: cell (GO:0005623);; cellular component: membrane (GO:0016020);; cellular component: cell part (GO:0044464);; molecular function: transporter activity (GO:0005215);; molecular function: molecular transducer activity (GO:0060089);; biological process: localization (GO:0051179);; cellular component: membrane part (GO:0044425);; molecular function: signal transducer activity (GO:0…
gene-LOC100801716	0.042818	0.085616	0	4.8389	2.49301	7.39358	1.54e-40	7.72323	up	[M]	Cell wall/membrane/envelope biogenesis	Molecular Function: calcium ion binding (GO:0005509);; Molecular Function: calmodulin binding (GO:0005516);; Molecular Function: ATP binding (GO:0005524);; Cellular Component: nucleus (GO:0005634);; Cellular Component: cytoplasm (GO:0005737);; Cellular Component: plasma membrane (GO:0005886);; Molecular Function: calcium-dependent protein serine/threonine kinase activity (GO:0009931);; Biological…	K13412|2.3e-309|gmx:100801716|K13412 calcium-dependent protein kinase [EC:2.7.11.1] | (RefSeq) calcium-dependent protein kinase 24	Plant-pathogen interaction (ko04626)	[T]	Signal transduction mechanisms	Protein kinase domain	Calcium-dependent protein kinase 24 OS=Arabidopsis thaliana OX=3702 GN=CPK24 PE=2 SV=1	T	Signal transduction mechanisms	calcium-dependent protein kinase 24 [Glycine max]	molecular function: binding (GO:0005488);; cellular component: cell (GO:0005623);; cellular component: organelle (GO:0043226);; cellular component: cell part (GO:0044464);; cellular component: membrane (GO:0016020);; molecular function: catalytic activity (GO:0003824);; biological process: metabolic process (GO:0008152);; biological process: cellular process (GO:0009987);; biological process: sig…
gene-LOC100804643	3.25765	2.83599	2.91308	0.086444	0	0	5.45e-11	-4.91411	down	--	--	Biological Process: amino acid transmembrane transport (GO:0003333);; Cellular Component: plasma membrane (GO:0005886);; Molecular Function: amino acid transmembrane transporter activity (GO:0015171);; Cellular Component: integral component of membrane (GO:0016021);;	--	--	[E]	Amino acid transport and metabolism	Transmembrane amino acid transporter protein	Amino acid permease 8 OS=Arabidopsis thaliana OX=3702 GN=AAP8 PE=1 SV=1	E	Amino acid transport and metabolism	amino acid permease 8 isoform X1 [Glycine max]	biological process: single-organism process (GO:0044699);; biological process: localization (GO:0051179);; cellular component: cell (GO:0005623);; cellular component: membrane (GO:0016020);; cellular component: cell part (GO:0044464);; molecular function: transporter activity (GO:0005215);; cellular component: membrane part (GO:0044425)
gene-LOC102664273	3.5561	4.10556	4.35201	4.00252	3.53824	3.89441	2.6e-09	1.37762	up	[T]	Signal transduction mechanisms	Biological Process: defense response to oomycetes (GO:0002229);; Molecular Function: transmembrane receptor protein serine/threonine kinase activity (GO:0004675);; Molecular Function: ATP binding (GO:0005524);; Cellular Component: plasma membrane (GO:0005886);; Biological Process: defense response (GO:0006952);; Cellular Component: integral component of membrane (GO:0016021);; Biological Process:…	K12489|2.1e-137|fve:101314822|K12489 Arf-GAP with coiled-coil, ANK repeat and PH domain-containing protein | (RefSeq) ADP-ribosylation factor GTPase-activating protein AGD3	Endocytosis (ko04144)	[T]	Signal transduction mechanisms	Protein kinase domain	Inactive leucine-rich repeat receptor-like protein kinase CORYNE OS=Arabidopsis thaliana OX=3702 GN=CRN PE=1 SV=1	T	Signal transduction mechanisms	inactive leucine-rich repeat receptor-like protein kinase CORYNE isoform X1 [Glycine max]	biological process: response to stimulus (GO:0050896);; biological process: multi-organism process (GO:0051704);; molecular function: catalytic activity (GO:0003824);; molecular function: signal transducer activity (GO:0004871);; molecular function: molecular transducer activity (GO:0060089);; biological process: metabolic process (GO:0008152);; biological process: cellular process (GO:0009987);;…
--	2.42883	1.38344	2.73005	0	0.051924	0.189538	0.000284243	-3.02356	down	--	--	Biological Process: amino acid transmembrane transport (GO:0003333);; Molecular Function: molecular_function (GO:0003674);; Molecular Function: transporter activity (GO:0005215);; Molecular Function: organic acid transmembrane transporter activity (GO:0005342);; Cellular Component: cellular_component (GO:0005575);; Cellular Component: cell (GO:0005623);; Cellular Component: plasma membrane (GO:00…	--	--	--	--	--	--	E	Amino acid transport and metabolism	hypothetical protein glysoja_027878 [Glycine soja]	biological process: single-organism process (GO:0044699);; biological process: localization (GO:0051179);; molecular function: transporter activity (GO:0005215);; cellular component: cell (GO:0005623);; cellular component: membrane (GO:0016020);; cellular component: cell part (GO:0044464);; cellular component: membrane part (GO:0044425)
gene-LOC100286794	3.69032	3.23111	3.70513	0.423216	0.501993	0.437131	1.92e-06	-1.46325	down	[T]	Signal transduction mechanisms	Molecular Function: transmembrane receptor protein serine/threonine kinase activity (GO:0004675);; Molecular Function: ATP binding (GO:0005524);; Cellular Component: plasma membrane (GO:0005886);; Biological Process: protein phosphorylation (GO:0006468);; Cellular Component: integral component of membrane (GO:0016021);;	K00924|3.5e-225|jre:108988162|K00924 kinase [EC:2.7.1.-] | (RefSeq) receptor protein kinase TMK1	--	--	--	Protein tyrosine and serine/threonine kinase	Receptor-like kinase TMK4 OS=Arabidopsis thaliana OX=3702 GN=TMK4 PE=1 SV=1	T	Signal transduction mechanisms	Rhg4-like receptor kinase II precursor [Glycine max]	molecular function: catalytic activity (GO:0003824);; molecular function: signal transducer activity (GO:0004871);; molecular function: molecular transducer activity (GO:0060089);; biological process: metabolic process (GO:0008152);; biological process: cellular process (GO:0009987);; biological process: signaling (GO:0023052);; biological process: single-organism process (GO:0044699);; biologica…
gene-LOC100808347	23.8655	36.154	21.1624	0.523789	0.810669	0.202867	1.44e-14	-4.06247	down	--	--	Biological Process: reproduction (GO:0000003);; Biological Process: developmental process involved in reproduction (GO:0003006);; Cellular Component: cellular_component (GO:0005575);; Cellular Component: cell (GO:0005623);; Cellular Component: plasma membrane (GO:0005886);; Biological Process: cell cycle (GO:0007049);; Biological Process: multicellular organism development (GO:0007275);; Biologic…	--	--	--	--	--	--	S	Function unknown	lysine-rich arabinogalactan protein 18 [Glycine max]	biological process: reproduction (GO:0000003);; biological process: reproductive process (GO:0022414);; biological process: developmental process (GO:0032502);; cellular component: cell (GO:0005623);; cellular component: membrane (GO:0016020);; cellular component: cell part (GO:0044464);; biological process: cellular process (GO:0009987);; biological process: single-organism process (GO:0044699);…
gene-LOC100802303	24.8041	18.6208	31.1865	21.9416	19.1139	16.3332	0.000180344	1.08595	up	--	--	Cellular Component: plasma membrane (GO:0005886);; Biological Process: carbohydrate transport (GO:0008643);; Cellular Component: integral component of membrane (GO:0016021);; Molecular Function: sugar transmembrane transporter activity (GO:0051119);;	K15382|9.1e-131|gmx:100802303|K15382 solute carrier family 50 (sugar transporter) | (RefSeq) bidirectional sugar transporter SWEET4 isoform X2	--	[R]	General function prediction only	Sugar efflux transporter for intercellular exchange	Bidirectional sugar transporter SWEET4 OS=Oryza sativa subsp. indica OX=39946 GN=SWEET4 PE=2 SV=1	U	Intracellular trafficking, secretion, and vesicular transport	bidirectional sugar transporter SWEET4 isoform X1 [Glycine max]	cellular component: cell (GO:0005623);; cellular component: membrane (GO:0016020);; cellular component: cell part (GO:0044464);; biological process: single-organism process (GO:0044699);; biological process: localization (GO:0051179);; cellular component: membrane part (GO:0044425);; molecular function: transporter activity (GO:0005215)
gene-LOC100776222	10.5904	14.0245	10.9219	27.4045	28.2379	20.1219	1.66e-16	2.54313	up	[DPM]	Cell cycle control, cell division, chromosome partitioning;; Inorganic ion transport and metabolism;; Cell wall/membrane/envelope biogenesis	Molecular Function: ferroxidase activity (GO:0004322);; Molecular Function: copper ion binding (GO:0005507);; Cellular Component: plasma membrane (GO:0005886);; Biological Process: iron ion transport (GO:0006826);; Biological Process: iron ion homeostasis (GO:0055072);;	K19791|1.3e-195|lang:109348653|K19791 iron transport multicopper oxidase | (RefSeq) L-ascorbate oxidase homolog	--	[Q]	Secondary metabolites biosynthesis, transport and catabolism	Multicopper oxidase	L-ascorbate oxidase homolog OS=Brassica napus OX=3708 GN=Bp10 PE=2 SV=1	Q	Secondary metabolites biosynthesis, transport and catabolism	L-ascorbate oxidase homolog [Glycine max]	molecular function: catalytic activity (GO:0003824);; biological process: metabolic process (GO:0008152);; biological process: single-organism process (GO:0044699);; molecular function: binding (GO:0005488);; cellular component: cell (GO:0005623);; cellular component: membrane (GO:0016020);; cellular component: cell part (GO:0044464);; biological process: localization (GO:0051179);; biological pr…
gene-LOC100786349	2.78087	2.64209	2.917	0.276604	0.152649	0.634904	0.00401878	-1.4907	down	[M]	Cell wall/membrane/envelope biogenesis	Molecular Function: transmembrane receptor protein serine/threonine kinase activity (GO:0004675);; Molecular Function: ATP binding (GO:0005524);; Cellular Component: plasma membrane (GO:0005886);; Biological Process: protein phosphorylation (GO:0006468);; Cellular Component: integral component of membrane (GO:0016021);;	K01180|1.5e-77|cmax:111487562|K01180 endo-1,3(4)-beta-glucanase [EC:3.2.1.6] | (RefSeq) uncharacterized protein LOC111487562	--	[T]	Signal transduction mechanisms	Protein tyrosine and serine/threonine kinase	Probable receptor-like serine/threonine-protein kinase At4g34500 OS=Arabidopsis thaliana OX=3702 GN=At4g34500 PE=2 SV=1	T	Signal transduction mechanisms	probable receptor-like serine/threonine-protein kinase At4g34500 [Glycine max]	molecular function: catalytic activity (GO:0003824);; molecular function: signal transducer activity (GO:0004871);; molecular function: molecular transducer activity (GO:0060089);; biological process: metabolic process (GO:0008152);; biological process: cellular process (GO:0009987);; biological process: signaling (GO:0023052);; biological process: single-organism process (GO:0044699);; biologica…
gene-LOC100812100	13.8313	36.5455	13.7426	0.110414	0.172966	0.36986	6.58e-18	-4.96908	down	--	--	Cellular Component: plasma membrane (GO:0005886);; Cellular Component: integral component of membrane (GO:0016021);;	K20855|2.3e-12|dzi:111275668|K20855 beta-1,3-galactosyltransferase 1/2/3/4/5/7/8 [EC:2.4.1.-] | (RefSeq) probable beta-1,3-galactosyltransferase 4 isoform X1	--	--	--	Domain of unknown function (DUF588)	CASP-like protein 2B1 OS=Ricinus communis OX=3988 GN=RCOM_0864260 PE=2 SV=1	S	Function unknown	CASP-like protein 2B1 [Glycine soja]	cellular component: cell (GO:0005623);; cellular component: membrane (GO:0016020);; cellular component: cell part (GO:0044464);; cellular component: membrane part (GO:0044425)
gene-LOC100783525	0.859356	0.716944	1.01852	0	0	0.019726	1.02e-05	-4.5052	down	--	--	Biological Process: amino acid transmembrane transport (GO:0003333);; Cellular Component: plasma membrane (GO:0005886);; Molecular Function: amino acid transmembrane transporter activity (GO:0015171);; Cellular Component: integral component of membrane (GO:0016021);;	--	--	[E]	Amino acid transport and metabolism	Transmembrane amino acid transporter protein	Proline transporter 1 OS=Arabidopsis thaliana OX=3702 GN=PROT1 PE=1 SV=1	E	Amino acid transport and metabolism	proline transporter 2 isoform X1 [Glycine max]	biological process: single-organism process (GO:0044699);; biological process: localization (GO:0051179);; cellular component: cell (GO:0005623);; cellular component: membrane (GO:0016020);; cellular component: cell part (GO:0044464);; molecular function: transporter activity (GO:0005215);; cellular component: membrane part (GO:0044425)
gene-LOC100780150	6.72093	7.74219	6.7116	0.525774	0.759542	0.73692	1.96e-09	-1.87298	down	--	--	Biological Process: polysaccharide biosynthetic process (GO:0000271);; Biological Process: cell morphogenesis (GO:0000902);; Biological Process: regulation of immune system process (GO:0002682);; Biological Process: negative regulation of immune system process (GO:0002683);; Molecular Function: molecular_function (GO:0003674);; Molecular Function: catalytic activity (GO:0003824);; Molecular Funct…	--	--	[S]	Function unknown	Armadillo/beta-catenin-like repeat	Protein CELLULOSE SYNTHASE INTERACTIVE 3 OS=Arabidopsis thaliana OX=3702 GN=CSI3 PE=1 SV=1	S	Function unknown	protein CELLULOSE SYNTHASE INTERACTIVE 3 [Glycine max]	biological process: metabolic process (GO:0008152);; biological process: single-organism process (GO:0044699);; biological process: cellular process (GO:0009987);; biological process: developmental process (GO:0032502);; biological process: cellular component organization or biogenesis (GO:0071840);; biological process: biological regulation (GO:0065007);; molecular function: catalytic activity (…
gene-LOC100817104	15.1767	4.56312	14.4254	0.851264	0.288178	0.502643	3.45e-07	-2.83101	down	--	--	Cellular Component: cellular_component (GO:0005575);; Cellular Component: intracellular (GO:0005622);; Cellular Component: cell (GO:0005623);; Cellular Component: cytoplasm (GO:0005737);; Cellular Component: vacuole (GO:0005773);; Cellular Component: plasma membrane (GO:0005886);; Cellular Component: cell-cell junction (GO:0005911);; Cellular Component: plasmodesma (GO:0009506);; Cellular Compone…	--	--	--	--	Remorin, C-terminal region	Remorin OS=Solanum tuberosum OX=4113 PE=1 SV=1	S	Function unknown	remorin [Glycine max]	cellular component: cell (GO:0005623);; cellular component: cell part (GO:0044464);; cellular component: organelle (GO:0043226);; cellular component: membrane (GO:0016020);; cellular component: cell junction (GO:0030054);; cellular component: symplast (GO:0055044)
gene-LOC100795671	7.79501	9.06469	6.8615	1.04247	0.608463	0.74891	9.1e-11	-1.8542	down	[N]	Cell motility	Cellular Component: Golgi apparatus (GO:0005794);; Cellular Component: trans-Golgi network (GO:0005802);; Cellular Component: plasma membrane (GO:0005886);; Biological Process: plant-type primary cell wall biogenesis (GO:0009833);; Cellular Component: integral component of membrane (GO:0016021);; Molecular Function: cellulose synthase activity (GO:0016759);; Molecular Function: cellulose synthase…	K10891|7.4e-165|tcc:18612304|K10891 fanconi anemia group D2 protein | (RefSeq) Fanconi anemia group D2 protein homolog	--	--	--	Cellulose synthase	Cellulose synthase-like protein H1 OS=Oryza sativa subsp. japonica OX=39947 GN=CSLH1 PE=2 SV=2	G	Carbohydrate transport and metabolism	cellulose synthase-like protein H1 [Glycine max]	cellular component: cell (GO:0005623);; cellular component: organelle (GO:0043226);; cellular component: cell part (GO:0044464);; cellular component: organelle part (GO:0044422);; cellular component: membrane (GO:0016020);; biological process: cellular process (GO:0009987);; biological process: single-organism process (GO:0044699);; biological process: cellular component organization or biogenesi…
gene-LOC100789684	3.32867	2.29735	3.36639	3.5172	3.98314	2.66959	7.12e-07	1.65967	up	[T]	Signal transduction mechanisms	Molecular Function: protein kinase activity (GO:0004672);; Molecular Function: ATP binding (GO:0005524);; Cellular Component: plasma membrane (GO:0005886);; Cellular Component: integral component of membrane (GO:0016021);;	K22911|2.8e-49|spen:107031166|K22911 thiamine phosphate phosphatase / amino-HMP aminohydrolase [EC:3.1.3.100 3.5.99.-] | (RefSeq) bifunctional TH2 protein, mitochondrial	Thiamine metabolism (ko00730)	--	--	Leucine rich repeat	Leucine-rich repeat receptor-like tyrosine-protein kinase PXC3 OS=Arabidopsis thaliana OX=3702 GN=PXC3 PE=2 SV=1	T	Signal transduction mechanisms	leucine-rich repeat receptor-like tyrosine-protein kinase PXC3 [Glycine max]	molecular function: catalytic activity (GO:0003824);; biological process: metabolic process (GO:0008152);; biological process: cellular process (GO:0009987);; molecular function: binding (GO:0005488);; cellular component: cell (GO:0005623);; cellular component: membrane (GO:0016020);; cellular component: cell part (GO:0044464);; cellular component: membrane part (GO:0044425)
gene-LOC100818942	13.1082	19.7132	12.5249	1.34172	0.426704	0.547045	7.05e-10	-2.81462	down	--	--	Cellular Component: plasma membrane (GO:0005886);; Cellular Component: integral component of membrane (GO:0016021);; Molecular Function: 4 iron, 4 sulfur cluster binding (GO:0051539);;	--	--	--	--	Domain of unknown function (DUF588)	CASP-like protein 4C1 OS=Ricinus communis OX=3988 GN=RCOM_0464280 PE=2 SV=1	S	Function unknown	CASP-like protein 4C2 [Glycine max]	cellular component: cell (GO:0005623);; cellular component: membrane (GO:0016020);; cellular component: cell part (GO:0044464);; cellular component: membrane part (GO:0044425);; molecular function: binding (GO:0005488)
gene-LOC100800447	12.0371	10.4576	11.5913	12.2305	12.6826	10.7207	5.76e-10	1.53494	up	--	--	Cellular Component: plasma membrane (GO:0005886);; Biological Process: immune response (GO:0006955);; Biological Process: plant-type hypersensitive response (GO:0009626);;	--	--	--	--	MAC/Perforin domain	MACPF domain-containing protein At4g24290 OS=Arabidopsis thaliana OX=3702 GN=At4g24290 PE=2 SV=1	S	Function unknown	MACPF domain-containing protein At4g24290 [Glycine max]	cellular component: cell (GO:0005623);; cellular component: membrane (GO:0016020);; cellular component: cell part (GO:0044464);; biological process: immune system process (GO:0002376);; biological process: response to stimulus (GO:0050896);; biological process: cellular process (GO:0009987);; biological process: single-organism process (GO:0044699)
gene-LOC100784967	2.64081	3.27997	2.05009	0	0.076184	0	2.92e-08	-4.77917	down	--	--	Cellular Component: plasma membrane (GO:0005886);; Molecular Function: kinase inhibitor activity (GO:0019210);;	K14499|6.8e-162|gmx:100784967|K14499 BRI1 kinase inhibitor 1 | (RefSeq) BRI1 kinase inhibitor 1	Plant hormone signal transduction (ko04075)	--	--	--	BRI1 kinase inhibitor 1 OS=Arabidopsis thaliana OX=3702 GN=BKI1 PE=1 SV=1	S	Function unknown	BRI1 kinase inhibitor 1 [Glycine max]	cellular component: cell (GO:0005623);; cellular component: membrane (GO:0016020);; cellular component: cell part (GO:0044464);; molecular function: molecular function regulator (GO:0098772);; biological process: biological regulation (GO:0065007)
gene-LOC100305905	370.758	441.046	386.943	4.43547	3.99136	4.98421	3.49e-124	-5.0081	down	--	--	Biological Process: response to acid chemical (GO:0001101);; Molecular Function: protein binding (GO:0005515);; Cellular Component: cellular_component (GO:0005575);; Cellular Component: intracellular (GO:0005622);; Cellular Component: cell (GO:0005623);; Cellular Component: cytoplasm (GO:0005737);; Cellular Component: vacuole (GO:0005773);; Cellular Component: vacuolar membrane (GO:0005774);; Cel…	--	--	--	--	PLAT/LH2 domain	PLAT domain-containing protein 2 OS=Arabidopsis thaliana OX=3702 GN=PLAT2 PE=2 SV=1	S	Function unknown	PLAT superfamily protein precursor [Glycine max]	biological process: response to stimulus (GO:0050896);; molecular function: binding (GO:0005488);; cellular component: cell (GO:0005623);; cellular component: cell part (GO:0044464);; cellular component: organelle (GO:0043226);; cellular component: membrane (GO:0016020);; cellular component: organelle part (GO:0044422)
gene-LOC100793873	0.759255	1.24148	0.914026	0	0	0	7.02e-09	-7.04123	down	--		Molecular Function: protein serine/threonine kinase activity (GO:0004674);; Molecular Function: ATP binding (GO:0005524);; Cellular Component: plasma membrane (GO:0005886);; Biological Process: hormone-mediated signaling pathway (GO:0009755);; Cellular Component: integral component of membrane (GO:0016021);;	K22911|3.3e-163|spen:107031166|K22911 thiamine phosphate phosphatase / amino-HMP aminohydrolase [EC:3.1.3.100 3.5.99.-] | (RefSeq) bifunctional TH2 protein, mitochondrial	Thiamine metabolism (ko00730)	--	--	Protein kinase domain	Leucine-rich repeat receptor-like protein kinase PXL1 OS=Arabidopsis thaliana OX=3702 GN=PXL1 PE=1 SV=1	T	Signal transduction mechanisms	leucine-rich repeat receptor-like protein kinase PXL1 [Glycine soja]	molecular function: catalytic activity (GO:0003824);; biological process: metabolic process (GO:0008152);; biological process: cellular process (GO:0009987);; molecular function: binding (GO:0005488);; cellular component: cell (GO:0005623);; cellular component: membrane (GO:0016020);; cellular component: cell part (GO:0044464);; biological process: signaling (GO:0023052);; biological process: sin…
gene-LOC100812486	2.00724	1.12668	1.85195	0.157978	0.066696	0.105325	7.32e-08	-2.37812	down	[M]	Cell wall/membrane/envelope biogenesis	Molecular Function: protein kinase activity (GO:0004672);; Molecular Function: ATP binding (GO:0005524);; Cellular Component: plasma membrane (GO:0005886);; Biological Process: hormone-mediated signaling pathway (GO:0009755);; Cellular Component: integral component of membrane (GO:0016021);;	K13415|1.9e-84|han:110929858|K13415 protein brassinosteroid insensitive 1 [EC:2.7.10.1 2.7.11.1] | (RefSeq) systemin receptor SR160-like	Plant hormone signal transduction (ko04075)	--	--	Leucine rich repeat	MDIS1-interacting receptor like kinase 2 OS=Arabidopsis thaliana OX=3702 GN=MIK2 PE=1 SV=3	T	Signal transduction mechanisms	MDIS1-interacting receptor like kinase 2 [Glycine max]	molecular function: catalytic activity (GO:0003824);; biological process: metabolic process (GO:0008152);; biological process: cellular process (GO:0009987);; molecular function: binding (GO:0005488);; cellular component: cell (GO:0005623);; cellular component: membrane (GO:0016020);; cellular component: cell part (GO:0044464);; biological process: signaling (GO:0023052);; biological process: sin…
gene-LOC100815707	6.33595	5.20656	4.9042	4.411	6.23111	3.14768	0.00269841	1.24375	up	--	--	Cellular Component: vacuolar membrane (GO:0005774);; Cellular Component: plasma membrane (GO:0005886);; Molecular Function: actin filament binding (GO:0051015);;	--	--	--	--	KIP1-like protein	Protein NETWORKED 3A OS=Arabidopsis thaliana OX=3702 GN=NET3A PE=2 SV=1	S	Function unknown	protein NETWORKED 3A [Glycine max]	cellular component: cell (GO:0005623);; cellular component: membrane (GO:0016020);; cellular component: organelle (GO:0043226);; cellular component: organelle part (GO:0044422);; cellular component: cell part (GO:0044464);; molecular function: binding (GO:0005488)
gene-LOC100797014	6.91882	7.2455	7.94892	1.00783	0.246793	1.14568	0.000128945	-1.75642	down	[G]	Carbohydrate transport and metabolism	Cellular Component: plasma membrane (GO:0005886);; Molecular Function: water channel activity (GO:0015250);; Cellular Component: integral component of membrane (GO:0016021);;	K09872|3.3e-161|gmx:100797014|K09872 aquaporin PIP | (RefSeq) aquaporin PIP2-2	--	[G]	Carbohydrate transport and metabolism	Major intrinsic protein	Aquaporin PIP2-2 OS=Arabidopsis thaliana OX=3702 GN=PIP2-2 PE=1 SV=2	G	Carbohydrate transport and metabolism	aquaporin PIP2-2 [Glycine max]	cellular component: cell (GO:0005623);; cellular component: membrane (GO:0016020);; cellular component: cell part (GO:0044464);; molecular function: transporter activity (GO:0005215);; biological process: single-organism process (GO:0044699);; biological process: localization (GO:0051179);; cellular component: membrane part (GO:0044425)
gene-LOC100792127	7.03788	6.11722	6.91982	6.12623	10.2192	6.91715	1.46e-05	1.75306	up	--	--	Cellular Component: Golgi membrane (GO:0000139);; Cellular Component: early endosome (GO:0005769);; Cellular Component: Golgi apparatus (GO:0005794);; Cellular Component: plasma membrane (GO:0005886);; Molecular Function: inorganic cation transmembrane transporter activity (GO:0022890);; Cellular Component: early endosome membrane (GO:0031901);; Cellular Component: ER membrane protein complex (GO…	K23566|1.2e-38|gmx:100792127|K23566 membrane magnesium transporter 1 | (RefSeq) uncharacterized protein LOC100792127	--	--	--	Membrane magnesium transporter	Membrane magnesium transporter OS=Arabidopsis thaliana OX=3702 GN=At5g03345 PE=3 SV=1	S	Function unknown	uncharacterized protein LOC100792127 isoform X1 [Glycine max]	cellular component: cell (GO:0005623);; cellular component: membrane (GO:0016020);; cellular component: organelle (GO:0043226);; cellular component: organelle part (GO:0044422);; cellular component: cell part (GO:0044464);; molecular function: transporter activity (GO:0005215);; biological process: localization (GO:0051179);; cellular component: macromolecular complex (GO:0032991);; cellular comp…
gene-LOC100820615	49.3875	43.0837	54.0226	0	0	0	9.54e-32	-11.4637	down	[T]	Signal transduction mechanisms	Molecular Function: ATP binding (GO:0005524);; Cellular Component: plasma membrane (GO:0005886);; Cellular Component: integral component of membrane (GO:0016021);; Molecular Function: ATPase activity (GO:0016887);; Molecular Function: ATPase activity, coupled to transmembrane movement of substances (GO:0042626);; Biological Process: transmembrane transport (GO:0055085);;	K05681|9.6e-65|cme:CYME_CMS467C|K05681 ATP-binding cassette, subfamily G (WHITE), member 2 | (RefSeq) ATP-binding cassette, sub-family G, member 2	ABC transporters (ko02010)	[Q]	Secondary metabolites biosynthesis, transport and catabolism	ABC-2 type transporter	ABC transporter G family member 11 OS=Arabidopsis thaliana OX=3702 GN=ABCG11 PE=1 SV=1	Q	Secondary metabolites biosynthesis, transport and catabolism	ABC transporter G family member 11-like [Glycine max]	molecular function: binding (GO:0005488);; cellular component: cell (GO:0005623);; cellular component: membrane (GO:0016020);; cellular component: cell part (GO:0044464);; cellular component: membrane part (GO:0044425);; molecular function: catalytic activity (GO:0003824);; molecular function: transporter activity (GO:0005215);; biological process: localization (GO:0051179)
gene-LOC100798931	1.40713	2.71728	1.0386	0.12004	0.067179	0.015514	6.59e-05	-2.92843	down	--	--	Cellular Component: plasma membrane (GO:0005886);;	--	--	--	--	--	--	--	--	uncharacterized protein LOC100798931 [Glycine max]	cellular component: cell (GO:0005623);; cellular component: membrane (GO:0016020);; cellular component: cell part (GO:0044464)
gene-LOC100788416	8.63889	6.5891	7.80807	0.944104	0.570543	1.18018	3.24e-09	-1.64616	down	[W]	Extracellular structures	Molecular Function: protein serine/threonine kinase activity (GO:0004674);; Molecular Function: ATP binding (GO:0005524);; Cellular Component: plasma membrane (GO:0005886);; Biological Process: protein phosphorylation (GO:0006468);; Cellular Component: integral component of membrane (GO:0016021);; Biological Process: defense response to bacterium (GO:0042742);;	K24104|1.3e-96|thj:104799061|K24104 GPN-loop GTPase | (RefSeq) LOW QUALITY PROTEIN: uncharacterized protein LOC104799061	--	--	--	Protein tyrosine and serine/threonine kinase	Cysteine-rich receptor-like protein kinase 10 OS=Arabidopsis thaliana OX=3702 GN=CRK10 PE=1 SV=3	T	Signal transduction mechanisms	cysteine-rich receptor-like protein kinase 10 isoform X1 [Glycine max]	molecular function: catalytic activity (GO:0003824);; biological process: metabolic process (GO:0008152);; biological process: cellular process (GO:0009987);; molecular function: binding (GO:0005488);; cellular component: cell (GO:0005623);; cellular component: membrane (GO:0016020);; cellular component: cell part (GO:0044464);; cellular component: membrane part (GO:0044425);; biological process:…
gene-LOC100791643	34.5005	62.4471	35.8028	0	0	0	5.92e-24	-10.4221	down	--	--	Cellular Component: plasma membrane (GO:0005886);; Biological Process: plant-type secondary cell wall biogenesis (GO:0009834);;	--	--	--	--	Fasciclin domain	Fasciclin-like arabinogalactan protein 12 OS=Arabidopsis thaliana OX=3702 GN=FLA12 PE=2 SV=2	S	Function unknown	fasciclin-like arabinogalactan protein 12 [Glycine max]	cellular component: cell (GO:0005623);; cellular component: membrane (GO:0016020);; cellular component: cell part (GO:0044464);; biological process: cellular process (GO:0009987);; biological process: cellular component organization or biogenesis (GO:0071840)
gene-LOC100777347	1.12414	0.659822	1.31877	1.86381	1.99517	0.272152	0.0094137	1.85333	up	--	--	Biological Process: mitotic cell cycle (GO:0000278);; Biological Process: mitotic cytokinesis (GO:0000281);; Biological Process: cell morphogenesis (GO:0000902);; Biological Process: cell morphogenesis involved in differentiation (GO:0000904);; Biological Process: cytokinesis (GO:0000910);; Biological Process: action potential (GO:0001508);; Biological Process: regulation of sodium ion transport …	K19044|1.3e-07|psom:113297792|K19044 E3 ubiquitin-protein ligase XBAT32/33 [EC:2.3.2.27] | (RefSeq) probable E3 ubiquitin-protein ligase XBOS32	--	[R]	General function prediction only	Ankyrin repeats (3 copies)	--	S	Function unknown	ankyrin-3 [Glycine max]	biological process: cellular process (GO:0009987);; biological process: single-organism process (GO:0044699);; biological process: developmental process (GO:0032502);; biological process: cellular component organization or biogenesis (GO:0071840);; biological process: biological regulation (GO:0065007);; biological process: multicellular organismal process (GO:0032501);; molecular function: struc…
gene-LOC100799312	1.39729	1.41342	1.6973	0.117635	0.133865	0.034758	1.52e-05	-2.38778	down	[P]	Inorganic ion transport and metabolism	Molecular Function: magnesium ion binding (GO:0000287);; Molecular Function: ATP binding (GO:0005524);; Cellular Component: plasma membrane (GO:0005886);; Cellular Component: integral component of membrane (GO:0016021);; Biological Process: phospholipid translocation (GO:0045332);;	K01530|0.0e+00|gmx:100799312|K01530 phospholipid-translocating ATPase [EC:7.6.2.1] | (RefSeq) putative phospholipid-transporting ATPase 9	--	[R]	General function prediction only	Phospholipid-translocating P-type ATPase C-terminal	Putative phospholipid-transporting ATPase 9 OS=Arabidopsis thaliana OX=3702 GN=ALA9 PE=3 SV=1	P	Inorganic ion transport and metabolism	putative phospholipid-transporting ATPase 9 [Glycine max]	molecular function: binding (GO:0005488);; cellular component: cell (GO:0005623);; cellular component: membrane (GO:0016020);; cellular component: cell part (GO:0044464);; cellular component: membrane part (GO:0044425);; biological process: cellular process (GO:0009987);; biological process: single-organism process (GO:0044699);; biological process: localization (GO:0051179);; biological process:…
gene-LOC100792281	7.04288	4.40786	5.71872	1.33635	0.289437	0.782218	0.00416056	-1.40035	down	--	--	Cellular Component: plasma membrane (GO:0005886);; Cellular Component: integral component of membrane (GO:0016021);; Molecular Function: transmembrane transporter activity (GO:0022857);;	--	--	--	--	EamA-like transporter family	WAT1-related protein At5g64700 OS=Arabidopsis thaliana OX=3702 GN=At5g64700 PE=2 SV=1	S	Function unknown	WAT1-related protein At5g64700 isoform X1 [Glycine max]	cellular component: cell (GO:0005623);; cellular component: membrane (GO:0016020);; cellular component: cell part (GO:0044464);; cellular component: membrane part (GO:0044425);; molecular function: transporter activity (GO:0005215);; biological process: localization (GO:0051179)
gene-LOC100810813	2.65941	1.81248	3.63212	3.05467	2.12458	4.7127	8.56e-06	1.69646	up	--	--	Cellular Component: plasma membrane (GO:0005886);; Cellular Component: integral component of membrane (GO:0016021);; Molecular Function: 4 iron, 4 sulfur cluster binding (GO:0051539);;	K20855|1.7e-10|dzi:111275668|K20855 beta-1,3-galactosyltransferase 1/2/3/4/5/7/8 [EC:2.4.1.-] | (RefSeq) probable beta-1,3-galactosyltransferase 4 isoform X1	--	--	--	Domain of unknown function (DUF588)	CASP-like protein 2B1 OS=Ricinus communis OX=3988 GN=RCOM_0864260 PE=2 SV=1	S	Function unknown	CASP-like protein 2B1 [Glycine max]	cellular component: cell (GO:0005623);; cellular component: membrane (GO:0016020);; cellular component: cell part (GO:0044464);; cellular component: membrane part (GO:0044425);; molecular function: binding (GO:0005488)
gene-LOC100799070	8.04703	4.50716	9.46884	49.8843	25.1526	39.1692	5.44e-31	3.79772	up	[G]	Carbohydrate transport and metabolism	Cellular Component: plasma membrane (GO:0005886);; Cellular Component: plant-type vacuole membrane (GO:0009705);; Cellular Component: integral component of membrane (GO:0016021);; Molecular Function: potassium ion antiporter activity (GO:0022821);; Biological Process: regulation of stomatal closure (GO:0090333);;	K12818|1.9e-76|smo:SELMODRAFT_429199|K12818 ATP-dependent RNA helicase DHX8/PRP22 [EC:3.6.4.13] | (RefSeq) hypothetical protein	Spliceosome (ko03040)	[R]	General function prediction only	Major Facilitator Superfamily	Protein ZINC INDUCED FACILITATOR-LIKE 1 OS=Arabidopsis thaliana OX=3702 GN=ZIFL1 PE=2 SV=1	S	Function unknown	protein ZINC INDUCED FACILITATOR-LIKE 1 isoform X2 [Glycine max]	cellular component: cell (GO:0005623);; cellular component: membrane (GO:0016020);; cellular component: cell part (GO:0044464);; cellular component: organelle (GO:0043226);; cellular component: organelle part (GO:0044422);; cellular component: membrane part (GO:0044425);; molecular function: transporter activity (GO:0005215);; biological process: cellular process (GO:0009987);; biological process…
gene-LOC100798027	9.69849	13.1025	10.0162	0.205045	0.38159	0.475337	3.12e-18	-3.41939	down	[M]	Cell wall/membrane/envelope biogenesis	Molecular Function: protein serine/threonine kinase activity (GO:0004674);; Molecular Function: calcium ion binding (GO:0005509);; Molecular Function: ATP binding (GO:0005524);; Cellular Component: plasma membrane (GO:0005886);; Biological Process: protein phosphorylation (GO:0006468);; Biological Process: cell surface receptor signaling pathway (GO:0007166);; Cellular Component: integral compone…	K23544|1.0e-129|brp:103842861|K23544 serine incorporator 1/3 | (RefSeq) serine incorporator 3	--	--	--	Protein tyrosine and serine/threonine kinase	Wall-associated receptor kinase 3 OS=Arabidopsis thaliana OX=3702 GN=WAK3 PE=2 SV=2	T	Signal transduction mechanisms	putative wall-associated receptor kinase-like 16 [Glycine max]	molecular function: catalytic activity (GO:0003824);; biological process: metabolic process (GO:0008152);; biological process: cellular process (GO:0009987);; molecular function: binding (GO:0005488);; cellular component: cell (GO:0005623);; cellular component: membrane (GO:0016020);; cellular component: cell part (GO:0044464);; biological process: signaling (GO:0023052);; biological process: sin…
gene-LOC100814600	2.28149	2.29682	2.17685	2.21651	1.61214	6.5103	0.000122638	1.95886	up	--	--	Cellular Component: plasma membrane (GO:0005886);; Cellular Component: integral component of membrane (GO:0016021);; Molecular Function: transmembrane transporter activity (GO:0022857);;	K17500|5.3e-36|nto:104085001|K17500 integrin-linked kinase-associated serine/threonine phosphatase 2C [EC:3.1.3.16] | (RefSeq) WAT1-related protein At3g18200 isoform X1	--	--	--	EamA-like transporter family	WAT1-related protein At5g40240 OS=Arabidopsis thaliana OX=3702 GN=At5g40240 PE=2 SV=1	S	Function unknown	WAT1-related protein At5g40210 [Glycine max]	cellular component: cell (GO:0005623);; cellular component: membrane (GO:0016020);; cellular component: cell part (GO:0044464);; cellular component: membrane part (GO:0044425);; molecular function: transporter activity (GO:0005215);; biological process: localization (GO:0051179)
--	0.06056	0.255966	0	3.51109	1.95598	2.46212	7.28e-16	5.65536	up	--	--	Molecular Function: ATP binding (GO:0005524);; Cellular Component: cytosol (GO:0005829);; Cellular Component: plasma membrane (GO:0005886);; Cellular Component: cytoplasmic side of plasma membrane (GO:0009898);; Molecular Function: ATPase activity (GO:0016887);; Biological Process: negative regulation of cell division (GO:0051782);;	K03609|1.6e-07|gmx:100802499|K03609 septum site-determining protein MinD | (RefSeq) putative septum site-determining protein minD homolog, chloroplastic	--	--	--	--	--	--	--	hypothetical protein GLYMA_09G132300 [Glycine max]	molecular function: binding (GO:0005488);; cellular component: cell (GO:0005623);; cellular component: cell part (GO:0044464);; cellular component: membrane (GO:0016020);; cellular component: membrane part (GO:0044425);; molecular function: catalytic activity (GO:0003824);; biological process: biological regulation (GO:0065007)
gene-LOC100801247	2.05361	1.82814	1.85556	1.24632	1.74785	1.20132	0.0060508	1.03698	up	[T]	Signal transduction mechanisms	Molecular Function: protein kinase activity (GO:0004672);; Molecular Function: ATP binding (GO:0005524);; Cellular Component: plasma membrane (GO:0005886);; Cellular Component: integral component of membrane (GO:0016021);; Molecular Function: carbohydrate binding (GO:0030246);;	K01176|1.2e-71|sbi:8065370|K01176 alpha-amylase [EC:3.2.1.1] | (RefSeq) alpha-amylase isozyme 2A	Starch and sucrose metabolism (ko00500)	--	--	Legume lectin domain	L-type lectin-domain containing receptor kinase S.4 OS=Arabidopsis thaliana OX=3702 GN=LECRKS4 PE=2 SV=1	T	Signal transduction mechanisms	L-type lectin-domain containing receptor kinase S.4 [Glycine max]	molecular function: catalytic activity (GO:0003824);; biological process: metabolic process (GO:0008152);; biological process: cellular process (GO:0009987);; molecular function: binding (GO:0005488);; cellular component: cell (GO:0005623);; cellular component: membrane (GO:0016020);; cellular component: cell part (GO:0044464);; cellular component: membrane part (GO:0044425)
gene-LOC100812840	0.780851	0.617674	1.0831	0.878809	0.628136	0.617648	0.00142748	1.22413	up	--	--	Molecular Function: protein binding (GO:0005515);; Cellular Component: cellular_component (GO:0005575);; Cellular Component: cell (GO:0005623);; Cellular Component: plasma membrane (GO:0005886);; Biological Process: cell communication (GO:0007154);; Biological Process: signal transduction (GO:0007165);; Biological Process: biological_process (GO:0008150);; Biological Process: response to radiatio…	K01866|3.1e-06|gra:105775527|K01866 tyrosyl-tRNA synthetase [EC:6.1.1.1] | (RefSeq) uncharacterized LOC105775527	Aminoacyl-tRNA biosynthesis (ko00970)	[R]	General function prediction only	Leucine rich repeat	Plant intracellular Ras-group-related LRR protein 4 OS=Arabidopsis thaliana OX=3702 GN=PIRL4 PE=1 SV=1	S	Function unknown	plant intracellular Ras-group-related LRR protein 4 [Glycine max]	molecular function: binding (GO:0005488);; cellular component: cell (GO:0005623);; cellular component: membrane (GO:0016020);; cellular component: cell part (GO:0044464);; biological process: cellular process (GO:0009987);; biological process: biological regulation (GO:0065007);; biological process: response to stimulus (GO:0050896);; biological process: signaling (GO:0023052)
gene-LOC100814266	3.19612	1.01533	2.81013	0	0.045403	0.079712	3.02e-05	-3.56917	down	--	--	Molecular Function: nucleotide binding (GO:0000166);; Molecular Function: molecular_function (GO:0003674);; Molecular Function: binding (GO:0005488);; Cellular Component: cellular_component (GO:0005575);; Cellular Component: cell (GO:0005623);; Cellular Component: plasma membrane (GO:0005886);; Molecular Function: drug binding (GO:0008144);; Cellular Component: membrane (GO:0016020);; Molecular F…	--	--	--	--	Universal stress protein family	--	T	Signal transduction mechanisms	uncharacterized protein LOC100814266 isoform X1 [Glycine max]	molecular function: binding (GO:0005488);; cellular component: cell (GO:0005623);; cellular component: membrane (GO:0016020);; cellular component: cell part (GO:0044464)
gene-LOC100781737	13.8706	17.6245	14.7388	0.753251	0.524436	1.33282	1.64e-15	-2.68837	down	--	--	Biological Process: reproduction (GO:0000003);; Biological Process: cell morphogenesis (GO:0000902);; Biological Process: cell morphogenesis involved in differentiation (GO:0000904);; Biological Process: urogenital system development (GO:0001655);; Biological Process: kidney development (GO:0001822);; Biological Process: liver development (GO:0001889);; Biological Process: tissue homeostasis (GO:…	K01087|1.2e-10|ccaj:109795950|K01087 trehalose 6-phosphate phosphatase [EC:3.1.3.12] | (RefSeq) trehalose-phosphate phosphatase A-like	Starch and sucrose metabolism (ko00500)	[Z]	Cytoskeleton	Tetratricopeptide repeat	Protein KINESIN LIGHT CHAIN-RELATED 2 OS=Arabidopsis thaliana OX=3702 GN=KLCR2 PE=1 SV=1	Z	Cytoskeleton	protein KINESIN LIGHT CHAIN-RELATED 2 isoform X1 [Glycine max]	biological process: reproduction (GO:0000003);; biological process: cellular process (GO:0009987);; biological process: developmental process (GO:0032502);; biological process: single-organism process (GO:0044699);; biological process: cellular component organization or biogenesis (GO:0071840);; biological process: multicellular organismal process (GO:0032501);; biological process: biological reg…
gene-LOC100809810	3.39391	3.15087	3.18566	0.22189	0.198264	0.212236	1.46e-11	-2.40956	down	--		Molecular Function: transmembrane receptor protein serine/threonine kinase activity (GO:0004675);; Molecular Function: ATP binding (GO:0005524);; Cellular Component: plasma membrane (GO:0005886);; Biological Process: protein phosphorylation (GO:0006468);; Cellular Component: integral component of membrane (GO:0016021);;	K13430|3.8e-76|pda:103708100|K13430 serine/threonine-protein kinase PBS1 [EC:2.7.11.1] | (RefSeq) serine/threonine-protein kinase PBS1-like	Plant-pathogen interaction (ko04626)	[T]	Signal transduction mechanisms	Protein tyrosine and serine/threonine kinase	Receptor-like serine/threonine-protein kinase ALE2 OS=Arabidopsis thaliana OX=3702 GN=ALE2 PE=1 SV=1	T	Signal transduction mechanisms	probable serine/threonine-protein kinase PBL7 [Glycine max]	molecular function: catalytic activity (GO:0003824);; molecular function: signal transducer activity (GO:0004871);; molecular function: molecular transducer activity (GO:0060089);; biological process: metabolic process (GO:0008152);; biological process: cellular process (GO:0009987);; biological process: signaling (GO:0023052);; biological process: single-organism process (GO:0044699);; biologica…
gene-LOC106795446	4.25454	5.16115	4.68645	0.465829	0.498732	0.671935	5.07e-08	-1.62751	down	[M]	Cell wall/membrane/envelope biogenesis	Molecular Function: protein serine/threonine kinase activity (GO:0004674);; Molecular Function: calcium ion binding (GO:0005509);; Molecular Function: ATP binding (GO:0005524);; Cellular Component: plasma membrane (GO:0005886);; Biological Process: protein phosphorylation (GO:0006468);; Biological Process: cell surface receptor signaling pathway (GO:0007166);; Cellular Component: integral compone…	K23544|1.0e-113|brp:103842861|K23544 serine incorporator 1/3 | (RefSeq) serine incorporator 3	--	--	--	Protein kinase domain	Wall-associated receptor kinase 2 OS=Arabidopsis thaliana OX=3702 GN=WAK2 PE=1 SV=1	T	Signal transduction mechanisms	putative wall-associated receptor kinase-like 16 [Glycine max]	molecular function: catalytic activity (GO:0003824);; biological process: metabolic process (GO:0008152);; biological process: cellular process (GO:0009987);; molecular function: binding (GO:0005488);; cellular component: cell (GO:0005623);; cellular component: membrane (GO:0016020);; cellular component: cell part (GO:0044464);; biological process: signaling (GO:0023052);; biological process: sin…
gene-LOC100792120	5.31114	3.0549	4.71735	6.65035	9.20376	4.0713	1.69e-06	2.09914	up	[T]	Signal transduction mechanisms	Molecular Function: protein serine/threonine kinase activity (GO:0004674);; Molecular Function: ATP binding (GO:0005524);; Cellular Component: nucleus (GO:0005634);; Cellular Component: cytoplasm (GO:0005737);; Cellular Component: plasma membrane (GO:0005886);; Biological Process: protein phosphorylation (GO:0006468);;	K08286|3.4e-278|tcc:18598189|K08286 protein-serine/threonine kinase [EC:2.7.11.-] | (RefSeq) serine/threonine-protein kinase KIPK	--	[R]	General function prediction only	Protein kinase domain	Serine/threonine-protein kinase KIPK2 OS=Arabidopsis thaliana OX=3702 GN=KIPK2 PE=1 SV=1	T	Signal transduction mechanisms	serine/threonine-protein kinase D6PKL1 [Glycine max]	molecular function: catalytic activity (GO:0003824);; biological process: metabolic process (GO:0008152);; biological process: cellular process (GO:0009987);; molecular function: binding (GO:0005488);; cellular component: cell (GO:0005623);; cellular component: organelle (GO:0043226);; cellular component: cell part (GO:0044464);; cellular component: membrane (GO:0016020)
gene-LOC100801286	4.37835	5.67687	4.48696	0.632199	0.74714	0.829978	8.39e-05	-1.24073	down	[I]	Lipid transport and metabolism	Molecular Function: phospholipase D activity (GO:0004630);; Cellular Component: plasma membrane (GO:0005886);; Biological Process: phospholipid catabolic process (GO:0009395);;	K01115|0.0e+00|gmx:100801286|K01115 phospholipase D1/2 [EC:3.1.4.4] | (RefSeq) phospholipase D gamma 1 isoform X1	Glycerophospholipid metabolism (ko00564);; Ether lipid metabolism (ko00565);; Endocytosis (ko04144)	[I]	Lipid transport and metabolism	C2 domain	Phospholipase D beta 1 OS=Arabidopsis thaliana OX=3702 GN=PLDBETA1 PE=1 SV=4	I	Lipid transport and metabolism	phospholipase D beta 1 isoform X2 [Glycine max]	molecular function: catalytic activity (GO:0003824);; cellular component: cell (GO:0005623);; cellular component: membrane (GO:0016020);; cellular component: cell part (GO:0044464);; biological process: metabolic process (GO:0008152);; biological process: cellular process (GO:0009987);; biological process: single-organism process (GO:0044699)
gene-LOC100791112	16.1371	31.6804	18.8735	0	0	0	9.57e-19	-9.4986	down	--	--	Cellular Component: plasma membrane (GO:0005886);; Biological Process: plant-type secondary cell wall biogenesis (GO:0009834);;	--	--	--	--	Fasciclin domain	Fasciclin-like arabinogalactan protein 12 OS=Arabidopsis thaliana OX=3702 GN=FLA12 PE=2 SV=2	--	--	putative fasciclin-like arabinogalactan precursor [Glycine max]	cellular component: cell (GO:0005623);; cellular component: membrane (GO:0016020);; cellular component: cell part (GO:0044464);; biological process: cellular process (GO:0009987);; biological process: cellular component organization or biogenesis (GO:0071840)
gene-LOC100810474	1.77768	1.12101	1.79376	1.15579	1.3888	0.981771	0.00875209	1.07289	up	[E]	Amino acid transport and metabolism	Molecular Function: peptidyltransferase activity (GO:0000048);; Cellular Component: plasma membrane (GO:0005886);; Biological Process: glutathione catabolic process (GO:0006751);; Cellular Component: integral component of membrane (GO:0016021);; Molecular Function: glutathione hydrolase activity (GO:0036374);;	K18592|0.0e+00|gmx:100810474|K18592 gamma-glutamyltranspeptidase / glutathione hydrolase / leukotriene-C4 hydrolase [EC:2.3.2.2 3.4.19.13 3.4.19.14] | (RefSeq) glutathione hydrolase 3	Taurine and hypotaurine metabolism (ko00430);; Cyanoamino acid metabolism (ko00460);; Glutathione metabolism (ko00480);; Arachidonic acid metabolism (ko00590)	[E]	Amino acid transport and metabolism	Gamma-glutamyltranspeptidase	Glutathione hydrolase 3 OS=Arabidopsis thaliana OX=3702 GN=GGT3 PE=2 SV=1	E	Amino acid transport and metabolism	glutathione hydrolase 3 [Glycine max]	molecular function: catalytic activity (GO:0003824);; cellular component: cell (GO:0005623);; cellular component: membrane (GO:0016020);; cellular component: cell part (GO:0044464);; biological process: metabolic process (GO:0008152);; biological process: cellular process (GO:0009987);; cellular component: membrane part (GO:0044425)
--	3.15394	1.38499	3.93417	0.138248	0.021388	0.054103	7.31e-10	-3.62425	down	[T]	Signal transduction mechanisms	Molecular Function: protein serine/threonine kinase activity (GO:0004674);; Molecular Function: ATP binding (GO:0005524);; Cellular Component: plasma membrane (GO:0005886);; Biological Process: protein phosphorylation (GO:0006468);; Cellular Component: integral component of membrane (GO:0016021);;	K24104|7.9e-84|thj:104799061|K24104 GPN-loop GTPase | (RefSeq) LOW QUALITY PROTEIN: uncharacterized protein LOC104799061	--	--	--	Protein tyrosine and serine/threonine kinase	Cysteine-rich receptor-like protein kinase 29 OS=Arabidopsis thaliana OX=3702 GN=CRK29 PE=2 SV=1	T	Signal transduction mechanisms	hypothetical protein GLYMA_20G138700 [Glycine max]	molecular function: catalytic activity (GO:0003824);; biological process: metabolic process (GO:0008152);; biological process: cellular process (GO:0009987);; molecular function: binding (GO:0005488);; cellular component: cell (GO:0005623);; cellular component: membrane (GO:0016020);; cellular component: cell part (GO:0044464);; cellular component: membrane part (GO:0044425)
gene-LOC100798645	1.97434	1.89102	2.026	0.075473	0.031441	0	5.21e-09	-3.97448	down	--	--	Cellular Component: vacuolar membrane (GO:0005774);; Cellular Component: plasma membrane (GO:0005886);; Molecular Function: actin filament binding (GO:0051015);;	--	--	--	--	KIP1-like protein	Protein NETWORKED 3A OS=Arabidopsis thaliana OX=3702 GN=NET3A PE=2 SV=1	S	Function unknown	protein NETWORKED 4B isoform X2 [Glycine max]	cellular component: cell (GO:0005623);; cellular component: membrane (GO:0016020);; cellular component: organelle (GO:0043226);; cellular component: organelle part (GO:0044422);; cellular component: cell part (GO:0044464);; molecular function: binding (GO:0005488)
gene-LOC100817369	107.158	48	113.029	0.199123	0.295677	0.595178	1.14e-45	-6.28739	down	--	--	Cellular Component: plasma membrane (GO:0005886);; Cellular Component: integral component of membrane (GO:0016021);; Molecular Function: transmembrane transporter activity (GO:0022857);;	K17500|1.8e-47|nta:107765414|K17500 integrin-linked kinase-associated serine/threonine phosphatase 2C [EC:3.1.3.16] | (RefSeq) WAT1-related protein At3g18200-like	--	--	--	EamA-like transporter family	WAT1-related protein At4g28040 OS=Arabidopsis thaliana OX=3702 GN=At4g28040 PE=2 SV=1	S	Function unknown	uncharacterized protein LOC100817369 [Glycine max]	cellular component: cell (GO:0005623);; cellular component: membrane (GO:0016020);; cellular component: cell part (GO:0044464);; cellular component: membrane part (GO:0044425);; molecular function: transporter activity (GO:0005215);; biological process: localization (GO:0051179)
gene-LOC100783671	3.05803	3.26673	3.0021	5.5592	6.95175	4.07853	1.83e-10	2.29905	up	--	--	Cellular Component: plasma membrane (GO:0005886);; Cellular Component: membrane (GO:0016020);;	--	--	--	--	--	Probable membrane-associated kinase regulator 2 OS=Arabidopsis thaliana OX=3702 GN=MAKR2 PE=2 SV=1	S	Function unknown	probable membrane-associated kinase regulator 2 [Glycine max]	cellular component: cell (GO:0005623);; cellular component: membrane (GO:0016020);; cellular component: cell part (GO:0044464)
gene-LOC100810557	0.957002	1.4329	0.787547	0.051043	0.079315	0.016048	0.000136398	-2.72864	down	--	--	Molecular Function: protein serine/threonine kinase activity (GO:0004674);; Molecular Function: ATP binding (GO:0005524);; Cellular Component: plasma membrane (GO:0005886);; Biological Process: protein phosphorylation (GO:0006468);; Biological Process: cell surface receptor signaling pathway (GO:0007166);; Cellular Component: integral component of membrane (GO:0016021);; Molecular Function: polys…	K13430|2.4e-29|dzi:111291965|K13430 serine/threonine-protein kinase PBS1 [EC:2.7.11.1] | (RefSeq) serine/threonine-protein kinase PBL27-like isoform X1	Plant-pathogen interaction (ko04626)	[T]	Signal transduction mechanisms	Protein tyrosine and serine/threonine kinase	Probably inactive receptor-like protein kinase At2g46850 OS=Arabidopsis thaliana OX=3702 GN=At2g46850 PE=3 SV=1	T	Signal transduction mechanisms	probably inactive receptor-like protein kinase At2g46850 [Glycine max]	molecular function: catalytic activity (GO:0003824);; biological process: metabolic process (GO:0008152);; biological process: cellular process (GO:0009987);; molecular function: binding (GO:0005488);; cellular component: cell (GO:0005623);; cellular component: membrane (GO:0016020);; cellular component: cell part (GO:0044464);; biological process: signaling (GO:0023052);; biological process: sin…
gene-LOC100795836	14.985	12.6485	15.7309	0.557431	0.576628	0.580532	1.08e-40	-3.14935	down	[P]	Inorganic ion transport and metabolism	Molecular Function: ATP binding (GO:0005524);; Cellular Component: plasma membrane (GO:0005886);; Molecular Function: hydrogen-exporting ATPase activity, phosphorylative mechanism (GO:0008553);; Cellular Component: integral component of membrane (GO:0016021);; Molecular Function: ATPase activity (GO:0016887);; Biological Process: regulation of intracellular pH (GO:0051453);; Biological Process: h…	K01535|0.0e+00|gmx:100795836|K01535 H+-transporting ATPase [EC:7.1.2.1] | (RefSeq) ATPase 10, plasma membrane-type isoform X2	Oxidative phosphorylation (ko00190)	[P]	Inorganic ion transport and metabolism	E1-E2 ATPase	ATPase 10, plasma membrane-type OS=Arabidopsis thaliana OX=3702 GN=AHA10 PE=2 SV=2	P	Inorganic ion transport and metabolism	ATPase 10, plasma membrane-type isoform X1 [Glycine max]	molecular function: binding (GO:0005488);; cellular component: cell (GO:0005623);; cellular component: membrane (GO:0016020);; cellular component: cell part (GO:0044464);; molecular function: catalytic activity (GO:0003824);; molecular function: transporter activity (GO:0005215);; biological process: single-organism process (GO:0044699);; biological process: localization (GO:0051179);; cellular c…
gene-LOC100782076	1.21694	0.744341	1.18909	0.129892	0.153609	0.146702	0.00228565	-1.34462	down	[M]	Cell wall/membrane/envelope biogenesis	Molecular Function: protein serine/threonine kinase activity (GO:0004674);; Molecular Function: ATP binding (GO:0005524);; Cellular Component: plasma membrane (GO:0005886);; Biological Process: hormone-mediated signaling pathway (GO:0009755);; Cellular Component: integral component of membrane (GO:0016021);;	K00924|1.8e-153|jcu:105638229|K00924 kinase [EC:2.7.1.-] | (RefSeq) receptor-like protein kinase HSL1	--	--	--	Protein kinase domain	MDIS1-interacting receptor like kinase 1 OS=Arabidopsis thaliana OX=3702 GN=MIK1 PE=1 SV=1	T	Signal transduction mechanisms	receptor-like protein kinase HSL1 [Glycine max]	molecular function: catalytic activity (GO:0003824);; biological process: metabolic process (GO:0008152);; biological process: cellular process (GO:0009987);; molecular function: binding (GO:0005488);; cellular component: cell (GO:0005623);; cellular component: membrane (GO:0016020);; cellular component: cell part (GO:0044464);; biological process: signaling (GO:0023052);; biological process: sin…
gene-LOC100803531	8.34956	6.57593	8.91107	8.37054	6.16753	6.45558	4.51e-08	1.26652	up	[P]	Inorganic ion transport and metabolism	Cellular Component: plasma membrane (GO:0005886);; Biological Process: cellular cadmium ion homeostasis (GO:0006876);; Biological Process: cellular iron ion homeostasis (GO:0006879);; Biological Process: cellular zinc ion homeostasis (GO:0006882);; Molecular Function: cation transmembrane transporter activity (GO:0008324);; Molecular Function: cadmium ion transmembrane transporter activity (GO:00…	--	--	[P]	Inorganic ion transport and metabolism	Cation efflux family	Metal tolerance protein 10 OS=Arabidopsis thaliana OX=3702 GN=MTP10 PE=2 SV=1	P	Inorganic ion transport and metabolism	metal tolerance protein 10 [Glycine max]	cellular component: cell (GO:0005623);; cellular component: membrane (GO:0016020);; cellular component: cell part (GO:0044464);; biological process: cellular process (GO:0009987);; biological process: single-organism process (GO:0044699);; biological process: biological regulation (GO:0065007);; molecular function: transporter activity (GO:0005215);; biological process: localization (GO:0051179);…
gene-LOC100820255	56.8763	22.3696	55.1996	5.66379	4.13424	4.94098	5.31e-06	-1.6995	down	--	--	Molecular Function: structural molecule activity (GO:0005198);; Cellular Component: plasma membrane (GO:0005886);; Biological Process: intracellular protein transport (GO:0006886);; Cellular Component: clathrin vesicle coat (GO:0030125);; Cellular Component: clathrin coat of trans-Golgi network vesicle (GO:0030130);; Cellular Component: clathrin coat of coated pit (GO:0030132);; Molecular Functio…	K04645|2.4e-48|bna:106370661|K04645 clathrin light chain B | (RefSeq) clathrin light chain 2	Endocytosis (ko04144)	--	--	Clathrin light chain	Clathrin light chain 1 OS=Arabidopsis thaliana OX=3702 GN=At2g20760 PE=2 SV=1	U	Intracellular trafficking, secretion, and vesicular transport	clathrin light chain 1 [Glycine max]	molecular function: structural molecule activity (GO:0005198);; cellular component: cell (GO:0005623);; cellular component: membrane (GO:0016020);; cellular component: cell part (GO:0044464);; biological process: localization (GO:0051179);; cellular component: macromolecular complex (GO:0032991);; cellular component: organelle (GO:0043226);; cellular component: organelle part (GO:0044422);; cellu…
gene-LOC100781944	13.0523	13.3992	13.5776	0.61357	0.694722	0.823705	5.14e-27	-2.736	down	--		Molecular Function: transmembrane receptor protein serine/threonine kinase activity (GO:0004675);; Molecular Function: ATP binding (GO:0005524);; Cellular Component: plasma membrane (GO:0005886);; Biological Process: protein phosphorylation (GO:0006468);; Cellular Component: integral component of membrane (GO:0016021);;	K01180|1.0e-128|cmax:111487562|K01180 endo-1,3(4)-beta-glucanase [EC:3.2.1.6] | (RefSeq) uncharacterized protein LOC111487562	--	[T]	Signal transduction mechanisms	Protein tyrosine and serine/threonine kinase	Proline-rich receptor-like protein kinase PERK1 OS=Arabidopsis thaliana OX=3702 GN=PERK1 PE=1 SV=1	T	Signal transduction mechanisms	proline-rich receptor-like protein kinase PERK1 [Glycine max]	molecular function: catalytic activity (GO:0003824);; molecular function: signal transducer activity (GO:0004871);; molecular function: molecular transducer activity (GO:0060089);; biological process: metabolic process (GO:0008152);; biological process: cellular process (GO:0009987);; biological process: signaling (GO:0023052);; biological process: single-organism process (GO:0044699);; biologica…
gene-LOC100788151	5.98318	3.30636	5.98331	0.017642	0.08701	0.053904	3.92e-19	-4.84022	down	[T]	Signal transduction mechanisms	Molecular Function: protein serine/threonine kinase activity (GO:0004674);; Molecular Function: ATP binding (GO:0005524);; Cellular Component: plasma membrane (GO:0005886);; Cellular Component: integral component of membrane (GO:0016021);; Biological Process: protein autophosphorylation (GO:0046777);;	K13415|2.6e-54|pda:103720660|K13415 protein brassinosteroid insensitive 1 [EC:2.7.10.1 2.7.11.1] | (RefSeq) brassinosteroid LRR receptor kinase BRI1-like	Plant hormone signal transduction (ko04075)	--	--	Protein kinase domain	Leucine-rich repeat receptor-like serine/threonine/tyrosine-protein kinase SOBIR1 OS=Arabidopsis thaliana OX=3702 GN=SOBIR1 PE=1 SV=1	T	Signal transduction mechanisms	leucine-rich repeat receptor-like serine/threonine/tyrosine-protein kinase SOBIR1 [Glycine max]	molecular function: catalytic activity (GO:0003824);; biological process: metabolic process (GO:0008152);; biological process: cellular process (GO:0009987);; molecular function: binding (GO:0005488);; cellular component: cell (GO:0005623);; cellular component: membrane (GO:0016020);; cellular component: cell part (GO:0044464);; cellular component: membrane part (GO:0044425)
gene-LOC100809188	2.30261	1.43162	3.33666	3.1893	3.30352	5.51605	7.37e-09	2.19494	up	[N]	Cell motility	Cellular Component: Golgi apparatus (GO:0005794);; Cellular Component: trans-Golgi network (GO:0005802);; Cellular Component: plasma membrane (GO:0005886);; Biological Process: plant-type primary cell wall biogenesis (GO:0009833);; Cellular Component: integral component of membrane (GO:0016021);; Molecular Function: cellulose synthase activity (GO:0016759);; Molecular Function: cellulose synthase…	K10999|7.0e-107|sot:102599079|K10999 cellulose synthase A [EC:2.4.1.12] | (RefSeq) probable cellulose synthase A catalytic subunit 3 [UDP-forming]	--	--	--	Cellulose synthase	Cellulose synthase-like protein G2 OS=Arabidopsis thaliana OX=3702 GN=CSLG2 PE=2 SV=1	G	Carbohydrate transport and metabolism	cellulose synthase-like protein G2 [Glycine max]	cellular component: cell (GO:0005623);; cellular component: organelle (GO:0043226);; cellular component: cell part (GO:0044464);; cellular component: organelle part (GO:0044422);; cellular component: membrane (GO:0016020);; biological process: cellular process (GO:0009987);; biological process: single-organism process (GO:0044699);; biological process: cellular component organization or biogenesi…
gene-LOC100779180	2.54814	4.43141	3.15286	0	0	0	4.66e-12	-7.97412	down	[DPM]	Cell cycle control, cell division, chromosome partitioning;; Inorganic ion transport and metabolism;; Cell wall/membrane/envelope biogenesis	Molecular Function: ferroxidase activity (GO:0004322);; Molecular Function: copper ion binding (GO:0005507);; Cellular Component: plasma membrane (GO:0005886);; Biological Process: iron ion transport (GO:0006826);; Biological Process: lignin catabolic process (GO:0046274);; Cellular Component: apoplast (GO:0048046);; Molecular Function: hydroquinone:oxygen oxidoreductase activity (GO:0052716);; B…	K05909|0.0e+00|gmx:100779180|K05909 laccase [EC:1.10.3.2] | (RefSeq) laccase-11	--	[Q]	Secondary metabolites biosynthesis, transport and catabolism	Multicopper oxidase	Laccase-11 OS=Arabidopsis thaliana OX=3702 GN=LAC11 PE=2 SV=1	Q	Secondary metabolites biosynthesis, transport and catabolism	laccase-11 [Glycine max]	molecular function: catalytic activity (GO:0003824);; biological process: metabolic process (GO:0008152);; biological process: single-organism process (GO:0044699);; molecular function: binding (GO:0005488);; cellular component: cell (GO:0005623);; cellular component: membrane (GO:0016020);; cellular component: cell part (GO:0044464);; biological process: localization (GO:0051179);; biological pr…
gene-LOC100796094	35.5232	36.3246	33.885	4.92304	4.70806	4.72143	2e-10	-1.40926	down	--	--	Cellular Component: cell wall (GO:0005618);; Cellular Component: plasma membrane (GO:0005886);;	K03097|2.2e-21|aip:107632886|K03097 casein kinase II subunit alpha [EC:2.7.11.1] | (RefSeq) casein kinase II subunit alpha-like isoform X3	Ribosome biogenesis in eukaryotes (ko03008);; Circadian rhythm - plant (ko04712)	--	--	Protein of unknown function (DUF642)	--	S	Function unknown	uncharacterized protein LOC100796094 precursor [Glycine max]	cellular component: cell (GO:0005623);; cellular component: cell part (GO:0044464);; cellular component: membrane (GO:0016020)
gene-LOC100783912	11.1595	8.42059	11.3542	0.707121	0.737477	1.33356	2.86e-08	-1.98689	down	--	--	Cellular Component: plasma membrane (GO:0005886);;	--	--	--	--	Domain of unknown function (DUF4228)	Uncharacterized protein At1g66480 OS=Arabidopsis thaliana OX=3702 GN=At1g66480 PE=2 SV=1	S	Function unknown	uncharacterized protein At1g66480 [Glycine max]	cellular component: cell (GO:0005623);; cellular component: membrane (GO:0016020);; cellular component: cell part (GO:0044464)
gene-LOC100811680	18.8103	22.8438	20.7113	1.84576	2.01308	1.97092	2.03e-13	-1.93602	down	[IR]	Lipid transport and metabolism;; General function prediction only	Molecular Function: NAD+ kinase activity (GO:0003951);; Molecular Function: diacylglycerol kinase activity (GO:0004143);; Molecular Function: ATP binding (GO:0005524);; Cellular Component: plasma membrane (GO:0005886);; Biological Process: defense response (GO:0006952);; Biological Process: protein kinase C-activating G-protein coupled receptor signaling pathway (GO:0007205);;	K00901|2.1e-285|gmx:100811680|K00901 diacylglycerol kinase (ATP) [EC:2.7.1.107] | (RefSeq) diacylglycerol kinase 7	Glycerolipid metabolism (ko00561);; Glycerophospholipid metabolism (ko00564);; Phosphatidylinositol signaling system (ko04070)	[IT]	Lipid transport and metabolism;; Signal transduction mechanisms	Diacylglycerol kinase accessory domain	Diacylglycerol kinase 7 OS=Arabidopsis thaliana OX=3702 GN=DGK7 PE=1 SV=1	--	--	diacylglycerol kinase 7 [Glycine max]	molecular function: catalytic activity (GO:0003824);; biological process: metabolic process (GO:0008152);; biological process: cellular process (GO:0009987);; molecular function: binding (GO:0005488);; cellular component: cell (GO:0005623);; cellular component: membrane (GO:0016020);; cellular component: cell part (GO:0044464);; biological process: response to stimulus (GO:0050896);; biological p…
gene-LOC100305449	1.018	0.409767	0.945152	0.022913	0	0.087456	0.00215298	-2.73559	down	[M]	Cell wall/membrane/envelope biogenesis	Molecular Function: protein kinase activity (GO:0004672);; Molecular Function: ATP binding (GO:0005524);; Cellular Component: plasma membrane (GO:0005886);; Biological Process: hormone-mediated signaling pathway (GO:0009755);; Cellular Component: integral component of membrane (GO:0016021);;	K13415|3.6e-82|han:110929858|K13415 protein brassinosteroid insensitive 1 [EC:2.7.10.1 2.7.11.1] | (RefSeq) systemin receptor SR160-like	Plant hormone signal transduction (ko04075)	--	--	Leucine rich repeat	MDIS1-interacting receptor like kinase 2 OS=Arabidopsis thaliana OX=3702 GN=MIK2 PE=1 SV=3	T	Signal transduction mechanisms	MDIS1-interacting receptor like kinase 2-like [Glycine soja]	molecular function: catalytic activity (GO:0003824);; biological process: metabolic process (GO:0008152);; biological process: cellular process (GO:0009987);; molecular function: binding (GO:0005488);; cellular component: cell (GO:0005623);; cellular component: membrane (GO:0016020);; cellular component: cell part (GO:0044464);; biological process: signaling (GO:0023052);; biological process: sin…
gene-LOC100786714	17.22	26.6212	18.8952	3.39229	3.49434	1.93065	0.00109111	-1.32995	down	[GER]	Carbohydrate transport and metabolism;; Amino acid transport and metabolism;; General function prediction only	Cellular Component: plasma membrane (GO:0005886);; Cellular Component: integral component of membrane (GO:0016021);; Molecular Function: transmembrane transporter activity (GO:0022857);;	K17500|5.9e-105|nto:104085001|K17500 integrin-linked kinase-associated serine/threonine phosphatase 2C [EC:3.1.3.16] | (RefSeq) WAT1-related protein At3g18200 isoform X1	--	--	--	EamA-like transporter family	Protein WALLS ARE THIN 1 OS=Arabidopsis thaliana OX=3702 GN=WAT1 PE=1 SV=1	S	Function unknown	protein WALLS ARE THIN 1 [Glycine max]	cellular component: cell (GO:0005623);; cellular component: membrane (GO:0016020);; cellular component: cell part (GO:0044464);; cellular component: membrane part (GO:0044425);; molecular function: transporter activity (GO:0005215);; biological process: localization (GO:0051179)
gene-LOC100784831	2.31215	1.1515	2.4457	0	0	0	6.06e-11	-7.67737	down	[M]	Cell wall/membrane/envelope biogenesis	Molecular Function: protein kinase activity (GO:0004672);; Molecular Function: ATP binding (GO:0005524);; Cellular Component: plasma membrane (GO:0005886);; Biological Process: hormone-mediated signaling pathway (GO:0009755);; Cellular Component: integral component of membrane (GO:0016021);;	K13415|1.6e-82|han:110929858|K13415 protein brassinosteroid insensitive 1 [EC:2.7.10.1 2.7.11.1] | (RefSeq) systemin receptor SR160-like	Plant hormone signal transduction (ko04075)	--	--	Protein kinase domain	MDIS1-interacting receptor like kinase 2 OS=Arabidopsis thaliana OX=3702 GN=MIK2 PE=1 SV=3	T	Signal transduction mechanisms	MDIS1-interacting receptor like kinase 2 isoform X1 [Glycine max]	molecular function: catalytic activity (GO:0003824);; biological process: metabolic process (GO:0008152);; biological process: cellular process (GO:0009987);; molecular function: binding (GO:0005488);; cellular component: cell (GO:0005623);; cellular component: membrane (GO:0016020);; cellular component: cell part (GO:0044464);; biological process: signaling (GO:0023052);; biological process: sin…
[truncated: 357 more rows]

## Sheet: monolayer-surrounded lipid stor
gene_name	HO40a_FPKM	HO40b_FPKM	HO40c_FPKM	LO40a_FPKM	LO40b_FPKM	LO40c_FPKM	FDR	log2FC	regulated	COG_class	COG_class_annotation	GO_annotation	KEGG_annotation	KEGG_pathway_annotation	KOG_class	KOG_class_annotation	Pfam_annotation	Swiss_Prot_annotation	eggNOG_class	eggNOG_class_annotation	NR_annotation	GO_second_level_annotation
[truncated: 12 more rows]
